# Supplementary material for: Ionogel thin films as a compatibilizing pretreatment for electrospray deposition
Source: Royal Society of Chemistry journal article supplement (doi:10.1039/d5lp00359h), 2026-01-01
Supplement: d5lp00359h1.zip [file A data - aligned.xlsx]

## Sheet: Sheet1
Lateral	Height Data	Height Data	Height Data	Height Data	Height Data	Mean	Standard Deviation
µm	nm	nm	nm	nm	nm	nm	nm
	E1	E2	E3	E4	E5	Statistics On Rows of B"Height Data":F"Height Data"	Statistics On Rows of B"Height Data":F"Height Data"
0	95.6006	110.751	30.8108	76.16	61.6866	75.0019	30.959
1.99867	70.5196	102.178	40.1052	76.3675	81.93	74.2201	22.4901
3.99734	64.5884	89.5784	45.0996	77.397	91.258	73.5843	19.2029
5.996	64.8829	84.518	49.8033	78.4116	96.0686	74.7369	17.9095
7.99467	66.1479	82.4442	54.8091	80.8134	95.2627	75.8954	15.6669
9.99334	68.5944	80.669	60.982	81.6557	96.0165	77.5835	13.4378
11.992	71.6004	80.5365	67.3908	83.8023	90.1794	78.7019	9.21255
13.9907	74.032	81.4512	73.4164	86.5645	84.1421	79.9212	5.94316
15.9893	64.3536	84.2918	78.9385	90.3562	78.4481	79.2777	9.63594
17.988	45.5799	89.1424	77.476	94.8612	73.7486	76.1616	19.1113
19.9867	35.7948	95.5311	81.5957	99.7202	73.4416	77.2167	25.451
21.9853	36.0752	102.58	87.7262	103.961	72.1759	80.5037	27.9867
23.984	37.7268	109.206	92.7348	105.552	64.0262	81.8491	30.3856
25.9827	40.3221	112.745	98.2707	103.912	52.3868	81.5271	32.7984
27.9813	43.6003	103.691	102.669	95.6235	37.3135	76.5794	33.1957
29.98	46.4151	98.2001	97.8136	93.9242	24.4502	72.1607	34.4561
31.9787	38.3918	97.8758	93.1492	90.7258	15.1909	67.0667	37.7578
33.9773	35.5525	98.1513	94.0904	90.7843	7.83277	65.2823	41.0638
35.976	40.7812	96.9596	93.336	89.4516	0	64.1057	42.514
37.9747	47.6204	95.6383	93.1508	88.5294	-6.0124	63.7853	43.6527
39.9734	55.6473	93.2436	93.3855	88.6529	-8.74398	64.4371	43.8376
41.972	62.9704	91.8757	93.5999	89.0148	-10.3382	65.4245	44.1476
43.9707	67.3949	90.5074	94.9804	88.9206	-11.0089	66.1589	44.4354
45.9694	50.0862	89.4153	96.9762	88.8235	-9.05766	63.2487	44.3784
47.968	32.3953	88.4636	99.8089	87.9668	-5.22453	60.682	45.2521
49.9667	20.7221	88.1049	102.984	87.3354	-3.20373	59.1885	47.22
51.9654	16.4885	87.8153	106.595	86.577	-2.88673	58.9179	48.7168
53.964	13.0511	88.5135	110.769	86.4324	-4.50902	58.8514	51.1081
55.9627	10.1474	88.9473	115.32	86.2717	-3.73313	59.3907	52.7585
57.9614	7.00065	90.0254	119.331	86.1944	-4.56577	59.5971	54.9652
59.96	4.67839	90.9818	120.023	85.0873	-8.70452	58.4131	56.9213
61.9587	2.43284	91.6256	120.965	84.7101	-8.93896	58.1589	57.8298
63.9574	0.73418	91.9314	122.103	84.3138	-11.678	57.4808	59.3421
65.956	-0.57511	90.3926	122.77	83.1125	-15.3263	56.0748	60.5482
67.9547	-1.16533	89.9187	123.615	82.9643	-18.471	55.3723	61.768
69.9534	-0.63554	88.4433	125.064	83.854	-23.6438	54.6165	63.5206
71.952	0.30528	88.6593	126.766	84.5261	-29.1972	54.2118	65.6366
73.9507	2.05827	90.3704	128.819	85.7504	-31.5246	55.0947	66.9612
75.9494	4.80631	92.7972	130.56	85.3883	-33.7463	55.961	67.9191
77.948	8.62858	95.7554	132.579	85.6153	-35.5452	57.4065	68.805
79.9467	13.0211	98.6118	133.598	92.289	-39.6935	59.5652	70.8782
81.9454	17.7893	96.3204	134.403	100.598	-37.8997	62.2422	70.4346
83.944	22.3055	93.9934	133.894	110.585	-34.346	65.2865	69.5649
85.9427	25.8747	90.5806	131.404	120.894	-30.2057	67.7097	68.4585
87.9414	19.697	88.2749	121.953	128.139	-26.6214	66.2884	67.473
89.94	5.23866	87.1518	117.041	122.322	-26.9237	60.9659	67.8689
91.9387	2.48299	87.1361	117.429	119.308	-26.1885	60.0336	67.6177
93.9374	1.4327	85.4105	117.075	119.035	-25.9224	59.4062	67.4526
95.936	0	85.6269	118.154	118.07	-20.4515	60.2798	66.1111
97.9347	-1.13677	86.6549	119.483	117.485	-11.6231	62.1725	64.0256
99.9334	-1.49618	88.6862	120.573	107.29	-3.37222	62.3361	60.2055
101.932	-0.85681	88.046	119.186	102.164	0	61.7079	57.7849
103.931	0.76196	87.1628	120.267	99.3959	-5.91697	60.3341	58.6848
105.929	3.8572	87.1527	119.645	98.9871	-11.4594	59.6365	59.314
107.928	8.49384	88.454	119.378	96.5189	-18.1738	58.9343	60.0571
109.927	15.1004	89.6792	118.883	92.7426	-23.711	58.5388	60.0687
111.925	22.6314	91.3887	118.798	93.4669	-25.8867	60.0797	59.8652
113.924	31.0651	93.0609	118.798	97.8555	-21.3123	63.8934	57.7849
115.923	35.9535	92.6345	118.79	104.466	-14.0795	67.5529	55.406
117.921	40.9138	87.9685	119.423	110.741	-5.50827	70.7077	52.3698
119.92	44.327	87.4296	119.593	119.096	2.56609	74.6022	50.6807
121.919	34.6889	88.0742	120.051	128.299	11.2112	76.4648	51.7797
123.917	27.9665	89.8588	120.41	137.74	13.9644	77.9881	55.0274
125.916	30.4475	91.947	120.904	141.538	2.45805	77.459	59.2426
127.915	33.8804	94.686	121.437	142.779	-9.51857	76.6526	63.1633
129.913	37.9628	97.3884	121.869	145.624	-24.923	75.5843	68.9935
131.912	43.6213	101.588	122.585	147.273	-31.9784	76.6177	71.7818
133.911	49.1441	106.7	123.313	145.984	-36.4421	77.7398	73.1918
135.909	54.3873	112.878	124	146.415	-38.9349	79.749	74.5471
137.908	51.7145	120.465	124.834	142.216	-40.5432	79.7372	75.5789
139.907	48.1557	127.335	125.361	140.37	-42.3092	79.7825	77.3242
141.905	42.3062	133.578	125.537	139.724	-43.9301	79.443	79.5127
143.904	42.9775	139.517	126.25	132.545	-45.4314	79.1715	79.9101
145.903	46.3155	146.254	127.714	130.522	-44.681	81.2248	80.4536
147.901	49.8785	151.095	129.505	128.084	-43.0773	83.097	80.3503
149.9	50.5449	147.454	132.083	126.428	-39.8283	83.3363	78.4044
151.899	50.2568	134.312	135.559	123.896	-35.2794	81.7489	74.3676
153.897	50.5391	118.105	139.995	121.454	-27.9387	80.4309	69.44
155.896	50.1343	103.217	145.553	120.735	-17.9055	80.3469	65.1392
157.895	49.5283	94.5047	150.27	120	-6.39704	81.5811	61.4993
159.893	47.0513	89.2932	153.839	119.228	3.92034	82.6665	58.9823
161.892	46.0424	87.096	158.76	119.738	14.6772	85.2628	57.259
163.891	47.4252	86.7726	163.855	125.623	27.5215	90.2394	55.7895
165.889	50.3758	87.8589	169.8	129.842	45.2115	96.6177	53.191
167.888	55.8865	91.4383	173.453	135.839	66.7496	104.673	49.2327
169.887	63.2599	97.8564	172.471	139.324	85.4363	111.67	43.8294
171.885	73.6513	105.432	163.54	140.252	96.1592	115.807	35.8705
173.884	86.1553	114.745	156.638	139.681	109.866	121.417	27.3654
175.883	100.797	118.81	154.508	135.762	121.44	126.263	20.0956
177.881	115.397	120.159	153.331	135.903	130.424	131.043	14.8664
179.88	117.997	125.439	153.618	138.808	139.097	134.992	13.7695
181.879	121.975	126.907	154.158	141.362	149.004	138.681	13.8835
183.877	137.828	124.657	155.788	143.089	159.161	144.104	13.9805
185.876	153.882	127.569	157.863	141.719	163.238	148.854	14.2942
187.875	172.505	138.616	160.979	138.516	163.177	154.759	15.402
189.873	189.775	153.811	164.54	138.411	166.208	162.549	18.8254
191.872	202.326	171.148	168.024	134.422	175.894	170.363	24.2387
193.871	212.439	189.776	173.919	132.114	195.327	180.715	30.456
195.869	222.611	201.379	180.334	137.142	219.27	192.147	35.0499
197.868	233.934	199.537	185.11	144.467	252.743	203.158	42.3948
199.867	245.982	188.692	183.855	150.575	292.252	212.271	56.3543
201.865	258.432	178.944	189.84	156.818	331.001	223.007	71.3097
203.864	278.759	173.264	197.006	165.822	368.723	236.715	86.3459
205.863	307.641	171.716	204.699	174.912	396.044	251.002	98.0627
207.861	341.992	175.355	211.14	189.028	417.813	267.066	107.2
209.86	378.905	180.002	213.337	206.412	442.361	284.204	118.23
211.859	411.557	181.691	215.202	224.417	476.545	301.882	132.755
213.857	446.403	180.538	219.37	243.744	520.267	322.064	151.207
215.856	469.143	182.384	223.344	258.082	578.955	342.381	172.417
217.855	494.06	186.104	226.516	262.775	648.599	363.611	199.19
219.853	526.508	192.484	230.927	259.067	716.839	385.165	227.377
221.852	566.023	200.666	235.443	265.817	774.604	408.511	251.171
223.851	604.928	214.237	239.384	270.952	844.789	434.858	278.709
225.849	645.145	229.551	245.306	276.157	915.14	462.26	305.943
227.848	678.156	252.349	252.21	279.391	974.938	487.409	327.075
229.847	713.243	277.819	260.248	289.365	1031.62	514.459	345.782
231.845	744.815	309.114	268.684	304.382	1081.69	541.738	359.793
233.844	773.386	340.122	278.64	327.151	1136.34	571.128	373.768
235.843	805.942	364.829	290.049	353.223	1193.24	601.457	389.426
237.841	842.078	378.179	301.373	384.634	1252.49	631.751	407.452
239.84	873.857	388.023	314.488	419.19	1312.03	661.519	424.915
241.839	886.271	396.272	332.684	452.256	1372.41	687.98	440.075
243.837	900.27	413.876	357.994	495.618	1420.63	717.677	446.782
245.836	912.687	439.605	392.018	541.342	1451.31	747.392	443.367
247.835	917.463	476.788	428.761	581.035	1472.47	775.303	433.934
249.833	925.624	517.183	471.535	608.408	1495.54	803.659	425.464
251.832	933.019	568.16	526.799	632.758	1513.83	834.912	411.554
253.831	941.158	623.601	595.604	650.786	1532.01	868.632	396.034
255.829	950.224	681.312	675.149	675.309	1549.13	906.225	378.34
257.828	972.081	735.695	756.687	702.122	1558.62	945.042	359
259.827	1005.48	793.437	832.903	729.088	1559.67	984.116	337.632
261.825	1037.51	857.543	916.588	742.926	1565.87	1024.09	320.956
263.824	1074.25	937.137	1007.27	762.99	1569.95	1070.32	302.413
265.823	1110.07	1024.47	1085.01	776.338	1572.4	1113.66	288.539
267.821	1149.42	1117.85	1163.11	786.845	1574.09	1158.26	279.553
269.82	1196.01	1214.86	1247.49	806.356	1574.06	1207.76	272.521
271.819	1237.43	1313.79	1313.56	842.658	1570.96	1255.68	263.178
273.817	1266.54	1412.9	1374.29	888.197	1567.33	1301.85	255.155
275.816	1284.92	1516.72	1439.22	930.68	1566.34	1347.58	256.221
277.815	1306.14	1618.22	1508.27	979.766	1568.37	1396.15	261.258
279.813	1338.85	1716.67	1579.52	1008.75	1572.17	1443.19	278.225
281.812	1376.43	1798.34	1628.89	1029.03	1585.28	1483.59	295.226
283.811	1427.54	1868.64	1683.41	1060.66	1600.2	1528.09	305.738
285.809	1492.79	1927.54	1730.28	1103.1	1612.04	1573.15	307.895
287.808	1550.72	1973.18	1788.05	1142.4	1624.4	1615.75	310.569
289.807	1592.77	2016.43	1843.67	1173.78	1636.73	1652.67	317.008
291.805	1618.08	2066.79	1893.85	1210.75	1652.5	1688.39	323.952
293.804	1633.81	2127.02	1936.39	1260.16	1672.64	1726	329.179
295.803	1637.41	2186.5	1951.4	1316.04	1689.44	1756.16	329.99
297.801	1647.89	2233.76	1959.35	1369.57	1719.66	1786.05	326.89
299.8	1664.83	2284.18	1974.21	1411.88	1754.54	1817.93	329.451
301.799	1688.04	2315.42	2003.02	1451.16	1785.22	1848.57	327.69
303.797	1723.66	2340	2037.11	1493.88	1798.99	1878.73	322.631
305.796	1746.43	2356.86	2082.71	1537.71	1805.36	1905.82	318.483
307.795	1756.36	2373.26	2134.55	1590.51	1795.64	1930.07	316.927
309.793	1770.66	2372.77	2192.72	1640.21	1785.52	1952.38	313.371
311.792	1778.47	2368.02	2242.67	1681.34	1773.83	1968.86	312.75
313.791	1776.12	2356.57	2266.23	1712.51	1762.12	1974.71	309.911
315.789	1784.52	2353.23	2280.65	1746.89	1762.73	1985.6	303.848
317.788	1807.23	2349.92	2300.72	1782.71	1756.29	1999.37	298.6
319.787	1843.29	2355.44	2323.69	1813	1746.94	2016.47	297.203
321.785	1882.04	2372.22	2315.42	1836.84	1743.78	2030.06	291.421
323.784	1918.33	2393.7	2308.03	1860.9	1751.56	2046.5	285.835
325.783	1938.45	2414.18	2313.01	1890.94	1759.5	2063.22	284.191
327.781	1956.3	2423.14	2332.43	1928.25	1764.51	2080.93	282.542
329.78	1977.53	2418.35	2346.44	1968.87	1768.9	2096.02	275.597
331.779	1999.98	2417.86	2366.63	2004.8	1764.67	2110.79	275.252
333.777	2030.66	2426.84	2392.16	2055.84	1768.8	2134.86	275.025
335.776	2060.9	2452.09	2419.76	2099.1	1771.76	2160.72	281.539
337.775	2080	2473.72	2444.11	2128.64	1774.89	2180.27	288.433
339.773	2100.77	2481.12	2467.17	2163.23	1781.03	2198.66	290.316
341.772	2127.79	2491.69	2477.34	2198.54	1791.06	2217.28	288.511
343.771	2141.07	2505.22	2498.11	2232.84	1812.26	2237.9	287.117
345.769	2149	2524.08	2475.22	2254.99	1839.84	2248.63	275.814
347.768	2165.23	2537.01	2466.45	2272.55	1877.69	2263.78	262.005
349.767	2170.45	2556.65	2468.62	2279.73	1923.1	2279.71	250.745
351.765	2169.21	2575.87	2475.19	2285.92	1969.65	2295.17	241.408
353.764	2176.19	2593.84	2482.49	2287.99	2007.97	2309.7	234.484
355.763	2194.5	2615.73	2478.08	2289.47	2035.7	2322.69	229.081
357.761	2218.47	2636.65	2465.18	2292.86	2043.22	2331.28	228.233
359.76	2233.27	2656.75	2473.2	2293.06	2044.91	2340.24	233.851
361.759	2253.85	2675.1	2498.22	2303.2	2043.71	2354.81	241.242
363.757	2268.16	2689.32	2528.07	2319.87	2038.6	2368.8	249.828
365.756	2268.75	2706.53	2544.99	2346.44	2047.89	2382.92	253.77
367.755	2283.64	2729.37	2581.5	2383.07	2049.48	2405.41	263.616
369.753	2300.14	2752.47	2629.73	2413.24	2047.65	2428.65	277.131
371.752	2306.45	2767.24	2656.55	2438.04	2054.39	2444.54	283.027
373.751	2314.28	2785.73	2648.37	2464.92	2068.6	2456.38	281.056
375.75	2321.34	2807.21	2636.55	2491.09	2099.94	2471.23	274.286
377.748	2317.91	2823.73	2639.5	2519.33	2146.33	2489.36	265.663
379.747	2304.53	2849.65	2658.21	2550.97	2185.59	2509.79	267.614
381.746	2281.63	2873.18	2678.19	2586.4	2221.18	2528.12	273.843
383.744	2265.14	2894.84	2710.47	2612.42	2253.56	2547.28	281.756
385.743	2258.51	2910.45	2708.42	2631.81	2284.81	2558.8	281.343
387.742	2270.07	2934.86	2721.3	2649.12	2312.46	2577.56	282.079
389.74	2278.96	2965.18	2729.4	2660.22	2345.6	2595.87	283.472
391.739	2284.6	2997.33	2761.34	2663.49	2387.03	2618.76	287.667
393.738	2287.82	3035.3	2814.24	2669.06	2435.46	2648.38	297.062
395.736	2287.19	3070.89	2888.41	2675.5	2486.3	2681.66	311.47
397.735	2270.88	3109.09	2960.62	2683.66	2530.38	2710.93	334.612
399.734	2262.16	3137.55	3017.88	2702.97	2585.89	2741.29	349.54
401.732	2266.47	3183.35	3048.05	2721.07	2640.96	2771.98	360.809
403.731	2283.6	3230.3	3077.83	2749.08	2681.83	2804.53	369.281
405.73	2302.91	3292.34	3107.56	2781.33	2715.05	2839.84	382.01
407.728	2310.23	3376.13	3129.23	2813.66	2737.03	2873.26	405.436
409.727	2303.54	3476.37	3147.94	2852.79	2752.76	2906.68	439.639
411.726	2300.89	3581.74	3169.62	2895.84	2764.74	2942.57	475.831
413.724	2301.35	3701.74	3179.98	2931.81	2766.3	2976.24	517.055
415.723	2297.21	3808.44	3209.71	2970.74	2771.21	3011.46	557.678
417.722	2297	3886.51	3224.74	3018.2	2777.69	3040.83	585.671
419.72	2284.72	3928.42	3241.92	3071.68	2795.46	3064.44	603.808
421.719	2272.01	3915.34	3254.87	3136.9	2825.93	3081.01	601.873
423.718	2273.67	3881.1	3275.72	3210.46	2849.29	3098.05	591.365
425.716	2282.26	3836.03	3307.32	3286.55	2855.51	3113.53	580.321
427.715	2305.86	3784.07	3358.69	3335.58	2859.98	3128.83	564.464
429.714	2334.28	3716.42	3415.06	3385.84	2864.16	3143.15	546.255
431.712	2364.27	3629.17	3467.66	3440.79	2865.22	3153.42	527.607
433.711	2409.17	3537.44	3521.67	3513.12	2872.35	3170.75	510.85
435.71	2458.72	3446.81	3564.84	3593.89	2880.59	3188.97	500.019
437.708	2488.86	3379.74	3620.26	3691.69	2895.75	3215.26	511.813
439.707	2523.13	3329.82	3669.45	3791.31	2912.63	3245.27	528.53
441.706	2547.82	3282.33	3722.75	3902.94	2930.24	3277.22	557.331
443.704	2562.71	3252.76	3774.39	4010.91	2948.5	3309.85	591.467
445.703	2578.63	3231.41	3823.9	4110.8	2969.74	3342.9	623.861
447.702	2584.44	3219.82	3884.3	4167.7	2988.49	3368.95	649.239
449.7	2578.59	3220.74	3948.95	4195.25	3015.9	3391.89	668.548
451.699	2559.41	3218.16	4008.42	4203.17	3033.1	3404.45	687.281
453.698	2553.03	3218.49	4040.38	4189.96	3048.28	3410.03	690.583
455.696	2553.26	3223.34	4049.9	4159.79	3052.56	3407.77	683.419
457.695	2564.5	3228.97	4033.24	4109.13	3042.43	3395.65	663.125
459.694	2590.68	3229.7	3997.84	4056.55	3027.79	3380.51	634.254
461.692	2620.1	3229.11	3961.44	4039.96	2997.02	3369.53	616.434
463.691	2636.05	3212.88	3920.48	4010.33	2971.1	3350.17	598.66
465.69	2649.38	3195.94	3893.95	3975.88	2946.19	3332.27	583.889
467.688	2661.48	3189.16	3875.97	3947.32	2920.08	3318.8	573.004
469.687	2689.26	3199.96	3872.48	3938.39	2900.43	3320.1	564.783
471.686	2722.98	3207.21	3874.57	3946.63	2885.33	3327.34	560.811
473.684	2756.52	3215.42	3892.21	3957.61	2882.66	3340.89	559.353
475.683	2791.53	3236.03	3910.88	3958.78	2885.85	3356.62	553.463
477.682	2824.13	3264.3	3894.13	3950.7	2882.91	3363.24	538.076
479.68	2862.68	3249.24	3891	3936.58	2868.46	3361.59	528.109
481.679	2897.14	3234.97	3873.37	3923.31	2861.6	3358.08	514.569
483.678	2912.75	3232.62	3872.46	3902	2861.08	3356.18	505.344
485.676	2905.65	3242.06	3871.97	3898.17	2872.08	3357.99	502.527
487.675	2877.48	3240.75	3887.67	3903.47	2890.63	3360	510.181
489.674	2852.44	3239.19	3908.74	3917.62	2923.57	3368.31	518.264
491.672	2845.85	3227.92	3889.28	3933.49	2955.88	3370.49	513.223
493.671	2854.09	3219.92	3876.71	3929.07	2991.71	3374.3	500.254
495.67	2861.25	3225.05	3874.41	3929.41	3027.15	3383.45	490.879
497.668	2868.32	3239	3881.17	3932.81	3048.76	3394.01	486.624
499.667	2855.74	3244.91	3880.46	3926.43	3069.84	3395.48	484.031
501.666	2850.52	3241.16	3873.92	3927.81	3087.31	3396.15	481.673
503.664	2847.12	3210.79	3876.48	3927.02	3099.77	3392.24	483.76
505.663	2828.16	3192.5	3888.72	3928.87	3091.53	3385.95	495.674
507.662	2799.92	3178.97	3902.53	3941.25	3083.61	3381.25	513.027
509.66	2786.7	3179.02	3912.11	3949.68	3076.61	3380.82	522.521
511.659	2790.52	3192.35	3940.06	3942.32	3062.32	3385.52	527.576
513.658	2824.26	3216.44	3977.73	3936.29	3049.11	3400.77	526.704
515.656	2855.57	3237.63	4018.7	3929.65	3048.43	3417.99	526.324
517.655	2865.82	3244.68	4076.17	3917.58	3048.22	3430.49	537.043
519.654	2866.45	3264.88	4136.67	3899.69	3047.69	3443.08	550.033
521.652	2859.98	3294.86	4187.82	3871.61	3048.06	3452.46	560.324
523.651	2837.96	3322.53	4219.21	3843.42	3045.66	3453.76	570.248
525.65	2822.55	3336.49	4208.93	3811.93	3051.9	3446.36	563.907
527.648	2825.43	3364.12	4183.21	3773.58	3062.51	3441.77	545.339
529.647	2840.54	3396.82	4170.3	3750.11	3073.11	3446.17	530.362
531.646	2844.07	3414.26	4160.84	3742.69	3089.67	3450.31	521.829
533.644	2830.24	3400.01	4146.97	3754.19	3104.7	3447.22	520.599
535.643	2834.32	3400.54	4117.89	3773.39	3130.42	3451.31	508.498
537.642	2843.25	3414.86	4097.86	3793.94	3149.16	3459.81	499.354
539.64	2863.26	3448.27	4089.15	3821.73	3155.35	3475.55	493.59
541.639	2872.75	3488.64	4077.79	3843	3161.43	3488.72	489.659
543.638	2879.57	3484.97	4061.76	3853.45	3168.65	3489.68	483.456
545.636	2887.63	3486.55	4041.28	3857.27	3177.72	3490.09	474.123
547.635	2889.47	3447.76	4034.46	3834.6	3185.58	3478.37	466.26
549.634	2884.24	3397.74	4032.73	3820.77	3195.76	3466.25	464.538
551.632	2889.7	3348.94	4037.15	3817.65	3205.62	3459.81	464.572
553.631	2913.99	3314.41	4029.54	3833.29	3212.69	3460.78	459.403
555.63	2927	3279.5	4031.66	3860.09	3223.05	3464.26	463.572
557.628	2931.95	3262.51	4045.79	3898.21	3239.93	3475.68	474.398
559.627	2945.91	3269.05	4068.2	3931.5	3273.54	3497.64	479.752
561.626	2943.47	3291.98	4092.26	3961.55	3296.99	3517.25	489.013
563.624	2942.41	3316.76	4093.74	3981.59	3323.08	3531.52	488.692
565.623	2947.46	3336.25	4092.97	4000.99	3351.09	3545.75	486.423
567.622	2947.24	3359.17	4099.98	4016.99	3372.54	3559.18	487.688
569.62	2918.54	3371.8	4115.51	4018.98	3380.1	3560.99	499.625
571.619	2864.69	3376.99	4140.53	4023.09	3397	3560.46	523.206
573.618	2829.43	3380.57	4182.18	4019.83	3402.72	3562.95	545.244
575.616	2830.73	3381.92	4220.79	4002.88	3385.03	3564.27	553.817
577.615	2855.33	3364.38	4260.14	3980.84	3371.07	3566.35	556.244
579.614	2872.5	3342.57	4286.42	3962.34	3353.36	3563.44	559.495
581.612	2891.12	3323.71	4295.54	3949.98	3349.36	3561.94	556.931
583.611	2909.66	3300.14	4274.89	3939.19	3349.75	3554.73	545.295
585.61	2903.32	3273.15	4238.03	3931.62	3349.25	3539.07	537.019
587.608	2890.51	3250.05	4191.9	3919.85	3354.18	3521.3	526.292
589.607	2891.8	3231.65	4139.77	3910.53	3362.23	3507.2	509.528
591.606	2902.64	3224.9	4086.62	3893.95	3371.08	3495.84	486.922
593.604	2895.94	3228.38	4035.27	3875.26	3392.06	3485.38	468.128
595.603	2864.75	3242.11	3990.46	3859.77	3406.75	3472.77	459.627
597.602	2847.99	3253.57	3948.47	3851.92	3410.25	3462.44	450.506
599.6	2843.09	3252.91	3914.05	3846.6	3414.55	3454.24	441.865
601.599	2838.96	3230.16	3891.41	3851.92	3420.38	3446.57	441.28
603.598	2830.13	3215.67	3877.2	3865.04	3426.62	3442.93	445.59
605.596	2813.23	3204.91	3880.33	3874.09	3441.29	3442.77	455.631
607.595	2799	3186.32	3896.3	3890.5	3454.21	3445.27	470.76
609.594	2789.41	3160.27	3916	3905.32	3469.19	3448.04	486.094
611.592	2786.74	3135.25	3944.65	3928.98	3487.68	3456.66	503.555
613.591	2790.78	3112.82	3962.63	3958.67	3498.92	3464.76	517.469
615.59	2802.75	3100.39	3985.25	3976.69	3500.9	3473.19	525.585
617.588	2829.76	3104.99	3982.94	4006.04	3504.9	3485.73	522.869
619.587	2850.87	3121.06	3958.23	4031.82	3506.53	3493.7	514.203
621.586	2852.45	3147.37	3933.17	4046.09	3513.78	3498.57	507.371
623.584	2860.52	3168.83	3915.38	4049.81	3524.89	3503.89	498.495
625.583	2871.81	3202.05	3911.64	4036.87	3536.67	3511.81	485.212
627.582	2872.08	3242.21	3923.13	4013.27	3545.23	3519.19	475.244
629.58	2871.83	3278.37	3948.9	3981.63	3554.5	3527.04	468.11
631.579	2875.55	3322.25	3974.04	3953.53	3564.39	3537.95	460.673
633.578	2869.7	3372.29	3977.38	3924.31	3587.63	3546.26	452.355
635.576	2870.59	3414.51	3967.79	3911.33	3622.66	3557.38	444.43
637.575	2870.08	3432.76	3961.8	3904.77	3673.88	3568.66	443.023
639.574	2858.91	3448.84	3967.45	3917.16	3720.19	3582.51	452.932
641.572	2857.47	3471.64	3992.79	3941.87	3746.85	3602.13	463.822
643.571	2857.53	3484.95	4017.02	3979.54	3766.05	3621.02	476.397
645.57	2850.56	3455.46	4032.9	4034.41	3773.58	3629.38	496.107
647.568	2840.61	3401.17	4029.57	4097	3779.35	3629.54	518.544
649.567	2834.52	3349.39	4026.25	4163.54	3779.7	3630.68	542.128
651.566	2829.77	3310.21	4023.52	4224.4	3783.53	3634.29	564.423
653.564	2824.65	3293.53	4022.7	4289.56	3788.4	3643.77	586.339
655.563	2837.35	3288.18	4019.71	4352.91	3797.14	3659.06	600.693
657.562	2852.6	3281.01	4014.87	4388.33	3802	3667.76	606.589
659.56	2863.83	3276.55	4013.67	4395.85	3817.12	3673.4	606.479
661.559	2866.74	3282.37	4012.57	4379.51	3828.34	3673.91	600.258
663.558	2875.36	3268.6	4012.27	4344.7	3846.75	3669.53	590.801
665.556	2897.52	3233.69	4017.11	4289.95	3861.18	3659.89	576.185
667.555	2909.88	3206.7	4018.61	4223.31	3865.55	3644.81	560.174
669.554	2908.27	3196.31	4026.75	4168.43	3858.32	3631.62	549.643
671.552	2910.1	3199.85	4025.58	4141.78	3847.41	3624.94	540.562
673.551	2915.36	3217.96	4027.63	4125.25	3838.81	3625	530.882
675.55	2926.71	3222.93	4044.63	4119.46	3817.02	3626.15	526.001
677.548	2930.32	3227.93	4084.02	4122.4	3813.24	3635.58	532.267
679.547	2927.52	3251.34	4115.79	4134.98	3821.52	3650.23	539.097
681.546	2914.64	3261.84	4141.53	4142.46	3823.96	3656.89	548.99
683.544	2882.6	3265.3	4171.45	4139.52	3829.25	3657.63	565.746
685.543	2858.87	3272.23	4187.55	4124.52	3832.98	3655.23	573.601
687.542	2846.27	3265.16	4182.51	4110.96	3839.8	3648.94	575.792
689.54	2857.16	3262.44	4166.13	4093.52	3848.92	3645.63	565.991
691.539	2883.16	3273.74	4155.9	4081.82	3852.92	3649.51	550.727
693.538	2911.68	3289.02	4154.85	4082.14	3855.25	3658.59	538.238
695.536	2927.86	3309.27	4164.69	4084.68	3852.54	3667.81	531.711
697.535	2925.68	3326.89	4181.98	4088.76	3851.06	3674.87	534.295
699.534	2927.71	3338.9	4191.61	4097.49	3844.34	3680.01	535.102
701.532	2915.01	3343.79	4200.55	4115.29	3842.22	3683.37	544.279
703.531	2888.05	3342.44	4198.32	4128.59	3840.92	3679.67	556.084
705.53	2882.11	3344.84	4198.52	4131.37	3847.77	3680.92	558.95
707.528	2901.47	3342.73	4181.19	4127.63	3853.62	3681.33	548.076
709.527	2925.03	3351.48	4161.78	4111.01	3856.84	3681.23	530.817
711.526	2939.24	3377.4	4147.09	4092.2	3858.77	3682.94	514.852
713.524	2955.91	3387.77	4146.21	4065.17	3856.67	3682.35	501.647
715.523	2957.72	3386.23	4147.58	4048.83	3859.68	3680.01	498.734
717.522	2930.26	3355.73	4153.42	4051.86	3857.37	3669.73	514.925
719.52	2904.35	3325.64	4154.99	4067.37	3858.78	3662.23	532.274
721.519	2911	3312.07	4164.27	4103.3	3860.72	3670.27	541.44
723.518	2942.7	3313.66	4170.05	4143.22	3865.37	3687	540.057
725.516	2962.81	3302.07	4185.49	4181.23	3869.19	3700.16	547.199
727.515	2974.62	3292.42	4215.83	4212.12	3883.66	3715.73	559.72
729.514	2964.57	3280.1	4246.39	4240.25	3897.97	3725.86	579.534
731.512	2954.4	3254.06	4273.51	4276.45	3899.26	3731.54	602.23
733.511	2927.45	3226.8	4305.09	4310.15	3891.07	3732.11	630.581
735.51	2900.29	3211.73	4331.64	4351.76	3875.51	3734.18	657.013
737.508	2877.41	3195.52	4348.58	4396.37	3863.93	3736.36	681.361
739.507	2878.15	3182.72	4371.32	4445.06	3839.12	3743.28	699.786
741.506	2873.97	3171.03	4393.18	4492.07	3831.08	3752.27	719.988
743.504	2879.04	3177.66	4401.5	4534.66	3831.99	3764.97	730.05
745.503	2888.97	3204.99	4402.94	4548	3844.79	3777.94	725.711
747.502	2889.85	3222.59	4389.14	4562.81	3861.05	3785.09	723.421
749.5	2871.31	3236.87	4374.04	4573.92	3878.27	3786.88	726.864
751.499	2858.51	3255.16	4359.74	4560.08	3892.86	3785.27	721.425
753.498	2842.53	3266.19	4330.08	4522.69	3904.31	3773.16	709.266
755.496	2827.94	3283.19	4299.66	4466.14	3914.8	3758.35	690.998
757.495	2834.06	3297.59	4271.42	4391.89	3921.21	3743.24	662.687
759.494	2852.22	3300.54	4241.65	4310.88	3916.54	3724.36	630.235
761.492	2880.47	3308.08	4220.23	4255.63	3915.5	3715.98	602.029
763.491	2901.08	3320.37	4202.27	4249.75	3906.13	3715.92	586.965
765.49	2907.97	3324.11	4187.98	4250.71	3895.53	3713.26	580.381
767.488	2934.39	3307.4	4183.43	4259.62	3889.1	3714.79	574.857
769.487	2959.58	3286.25	4182.73	4278.03	3882.79	3717.88	574.1
771.486	2987.38	3268.86	4191.49	4301.42	3870.93	3724.02	575.177
773.484	3013.4	3251.02	4204.62	4328.22	3860.09	3731.47	579.432
775.483	3025.27	3236.06	4212.07	4351.97	3855.97	3736.27	586.415
777.482	3025.86	3229.12	4219.54	4364.6	3854.07	3738.64	592.471
779.48	3025.2	3232.15	4230.62	4366.19	3880.35	3746.9	596.056
781.479	3034.58	3246.98	4222.05	4346.12	3923.34	3754.61	585.872
783.478	3045.09	3282.63	4212.5	4308.03	3985.39	3766.73	568.913
785.476	3033.18	3304.5	4206.71	4268.38	4054.59	3773.47	565.602
787.475	3015.18	3319.94	4189.18	4221.15	4095.32	3768.15	560.662
789.474	3000.04	3309.72	4176.81	4181.92	4124.19	3758.54	562.285
791.472	2990.9	3273.71	4177.2	4153.04	4140.6	3747.09	570.208
793.471	2982.83	3238.94	4193.12	4141.99	4153.69	3742.11	583.611
795.47	2953.53	3202.71	4220.56	4138.98	4167.41	3736.64	608.268
797.468	2923.88	3170.23	4238.54	4133.99	4172.87	3727.9	628.71
799.467	2896.18	3148.11	4256.1	4124.79	4194.06	3723.85	648.395
801.466	2877.86	3131.35	4267.18	4121.17	4207.24	3720.96	662.092
803.464	2880.12	3137.23	4258.76	4116.16	4210.13	3720.48	658.112
805.463	2887.09	3140.47	4241.6	4124.21	4207.34	3720.14	652.411
807.462	2877.13	3148.75	4222.68	4142.17	4208.16	3719.78	653.062
809.46	2876.78	3156.02	4207.12	4168.04	4199.61	3721.51	651.369
811.459	2864.35	3150.75	4188.21	4197.93	4196.59	3719.57	657.829
813.458	2852.08	3155.22	4174.27	4230.82	4191.98	3720.88	663.761
815.456	2857.21	3172.59	4171.24	4258.49	4198.76	3731.66	664.489
817.455	2859.77	3188.56	4180.05	4280.22	4199.36	3741.59	666.217
819.454	2852.44	3205.5	4193.2	4292.96	4206.91	3750.2	671.209
821.452	2855.57	3217.2	4204.23	4303.67	4215.1	3759.15	673.176
823.451	2868.57	3219.56	4212.3	4304.27	4217.55	3764.45	670.221
825.45	2873.63	3224.81	4219.48	4303.17	4217.55	3767.73	668.447
827.448	2874.54	3234.86	4227.73	4291.17	4217.25	3769.11	665.092
829.447	2866.78	3262.66	4240.1	4263.16	4209.79	3768.5	657.799
831.446	2871.7	3292.13	4247.46	4229.24	4199.04	3767.91	643.858
833.444	2887.65	3307.79	4237.93	4183.02	4191.69	3761.62	624.338
835.443	2902.14	3315.84	4228.57	4146.56	4181.52	3754.92	608.224
837.442	2896.44	3329.51	4227.66	4139.47	4175.69	3753.75	605.468
839.44	2891.72	3326.26	4234.12	4154.94	4166.99	3754.81	609.98
841.439	2889.13	3311.98	4230.79	4167.08	4153.23	3750.44	612.509
843.438	2900.98	3298.92	4226.66	4168.69	4136.88	3746.43	607.541
845.436	2918.12	3283.14	4224.82	4157.45	4124.73	3741.65	600.318
847.435	2920.24	3272.15	4215.88	4154.82	4113.73	3735.36	597.703
849.434	2931.71	3270.37	4205.72	4163.49	4118.04	3737.87	594.352
851.432	2935.09	3278.18	4197.68	4174.41	4126.32	3742.34	593.412
853.431	2936.02	3267.38	4202.92	4172.28	4135.18	3742.76	597.291
855.43	2924.75	3251.52	4224.74	4162.35	4144.47	3741.56	608.315
857.428	2903.93	3233.69	4260.94	4146.9	4158.69	3740.83	626.022
859.427	2906.18	3216.26	4286.9	4131.44	4168.83	3741.92	633.592
861.426	2898.22	3205.5	4310.78	4119.67	4177.39	3742.31	643.33
863.424	2904.16	3209.66	4328.48	4119.23	4178.43	3747.99	644.575
865.423	2915.71	3207.87	4335.94	4124.76	4177.96	3752.45	643.593
867.422	2907.32	3209.82	4331.37	4140.8	4180.09	3753.88	647.594
869.42	2889.84	3217.99	4325.33	4165.05	4188.67	3757.38	655.427
871.419	2886.22	3234.94	4315.1	4203.86	4212.22	3770.47	661.115
873.418	2883.89	3236.1	4305.51	4253.31	4237.28	3783.22	672.327
875.416	2905.15	3227.45	4306.6	4301.01	4262.43	3800.53	680.084
877.415	2936.14	3228.37	4314.99	4341.85	4283.74	3821.02	682.572
879.414	2951.27	3240.09	4328.22	4373.01	4306	3839.72	687.269
881.412	2976.53	3245.37	4338.4	4395.96	4332.67	3857.79	688.804
883.411	3026.49	3250.33	4350.87	4406.18	4349.99	3876.77	679.04
885.41	3081.19	3255.19	4360.48	4396.52	4368.41	3892.36	664.061
887.408	3114.25	3257.87	4370.61	4389.27	4390.61	3904.52	657.873
889.407	3139.99	3263.28	4384.05	4378.93	4402.7	3913.79	651.627
891.406	3162.96	3253.49	4387.4	4364.56	4414.54	3916.59	647.678
893.404	3179.2	3240.86	4375.49	4347.67	4420.97	3912.84	642.475
895.403	3181.23	3239.91	4364.31	4337.71	4417.74	3908.18	637.818
897.402	3150.41	3248.56	4356.21	4343.55	4408.05	3901.36	642.11
899.4	3089.36	3267.94	4347.95	4360.89	4401.59	3893.54	655.955
901.399	3035.32	3280.89	4338.48	4370.69	4394.58	3883.99	668.602
903.398	3004.06	3293.45	4318.13	4370.42	4416.37	3880.48	676.658
905.396	2994.69	3300.76	4295.23	4390.73	4465.04	3889.29	688.184
907.395	2981.28	3305	4274.88	4412.21	4562.73	3907.22	714.129
909.394	2946.31	3303.4	4262.65	4418.94	4711.79	3928.62	761.77
911.392	2911.76	3289.02	4252.74	4450.23	4912.8	3963.31	834.089
913.391	2890.41	3280.71	4232.59	4488.96	5175.92	4013.72	925.148
915.39	2861.19	3288.78	4211.04	4542.61	5492.84	4079.29	1041.49
917.388	2838.11	3307.63	4201.35	4592.09	5836.98	4155.23	1169.88
919.387	2838.31	3333.73	4204.59	4628.33	6199.27	4240.84	1301.62
921.386	2846.06	3363.94	4220.78	4647.64	6551.32	4325.95	1430.24
923.384	2843.84	3395.02	4235.3	4651.78	6842.83	4393.75	1540.24
925.383	2846.48	3419.82	4252.49	4642.1	7072.73	4446.72	1626.89
927.382	2847.5	3456.62	4274.84	4619.49	7221.11	4483.91	1679.84
929.38	2860.26	3498.82	4306.8	4582.28	7306.09	4510.85	1703.58
931.379	2870.81	3523.73	4339.24	4543.29	7315.49	4518.51	1700.02
933.378	2872.32	3535.15	4359.76	4500.03	7267.66	4506.98	1677.77
935.376	2853.9	3531.58	4389.07	4453.46	7152.14	4476.03	1635
937.375	2844.94	3507.63	4428.27	4412.67	6960.5	4430.8	1562.6
939.374	2840.79	3486.42	4473.62	4381.17	6708.39	4378.08	1466.1
941.372	2842.94	3480.25	4514.44	4347.83	6392.25	4315.54	1343.46
943.371	2831.56	3484.56	4531.27	4331.46	6064.3	4248.63	1222.22
945.37	2815.33	3492.42	4517.85	4336.51	5743.23	4181.07	1108.76
947.368	2802.62	3503.02	4466.43	4350.04	5470.14	4118.45	1013.9
949.367	2766.58	3503.4	4394.82	4368.8	5253.81	4057.48	950.702
951.366	2738.82	3510.92	4316.59	4397.48	5067.85	4006.33	898.344
953.364	2712.83	3520.78	4249.11	4433	4917.98	3966.74	862.145
955.363	2707.15	3522.42	4210.55	4465.45	4792.56	3939.63	832.233
957.362	2706.26	3527.88	4190.99	4500.4	4678.34	3920.77	808.13
959.36	2716.03	3535.66	4186.05	4518.46	4580.14	3907.27	784.404
961.359	2730.94	3542.25	4187.63	4520.54	4506.46	3897.56	763.259
963.358	2736.84	3546.97	4179.4	4506.94	4431.19	3880.27	742.333
965.356	2745.64	3557.84	4175.17	4478.16	4363.59	3864.08	719.04
967.355	2751.78	3571.97	4185.2	4431.51	4305.13	3849.12	696.605
969.354	2760.3	3590.78	4210.88	4372.92	4251.93	3837.36	674.365
971.352	2751.61	3616.42	4247.17	4305.89	4225.52	3829.32	664.356
973.351	2744.58	3642.53	4265.53	4236.04	4212.15	3820.17	654.485
975.35	2734.82	3657.15	4276.89	4177.63	4206.49	3810.6	649.944
977.348	2720.23	3662.17	4282.46	4140.45	4221.65	3805.39	654.065
979.347	2721.95	3661.67	4287.94	4112.67	4248.15	3806.48	655.326
981.346	2716.29	3653.24	4298.6	4082.52	4276.35	3805.4	661.655
983.344	2711.37	3639.95	4312.82	4049.18	4302.84	3803.23	668.694
985.343	2722.68	3631.09	4322.86	4027.22	4331.9	3807.15	670.23
987.342	2736.06	3637.58	4323.05	4016.95	4358.79	3814.49	668.992
989.34	2761.85	3654.14	4325.25	4006.67	4380.5	3825.68	661.686
991.339	2786.22	3659.47	4310.43	4005.87	4389.44	3830.29	650.63
993.338	2800.51	3653.17	4285.76	4006.52	4392.66	3827.72	641.591
995.336	2817.29	3636.09	4262.7	4017.9	4401.43	3827.08	634.862
997.335	2835.84	3604.92	4246.07	4043.89	4416.83	3829.51	632.901
999.334	2829.6	3564.81	4232.25	4073.63	4445.92	3829.24	646.462
1001.33	2813.69	3527.16	4228.36	4106.86	4499.73	3835.16	672.376
1003.33	2807.24	3498.09	4228.31	4135.66	4565.14	3846.88	697.726
1005.33	2805.29	3489.59	4224.48	4155.73	4627.28	3860.47	717.398
1007.33	2814.38	3495	4233.28	4168.69	4651.82	3872.63	722.384
1009.33	2823.77	3523.69	4258.48	4168.35	4654.19	3885.7	719.06
1011.33	2823.72	3554.72	4295.83	4159.02	4635.73	3893.8	714.578
1013.32	2819.67	3583.46	4345.09	4143.85	4603.22	3899.06	710.525
1015.32	2802.44	3602.74	4393.15	4121.38	4559.32	3895.81	710.6
1017.32	2786.72	3610.03	4398.14	4087.65	4500.52	3876.61	700.841
1019.32	2771.54	3606.5	4383.19	4044.4	4452.62	3851.65	690.574
1021.32	2780.93	3592.75	4349.58	3998.22	4411.21	3826.54	669.486
1023.32	2789.86	3574.18	4304.36	3967.47	4366.14	3800.4	646.976
1025.32	2810.71	3544.05	4257.37	3971.88	4330.61	3782.92	625.104
1027.32	2818.78	3512.1	4211.97	3978.32	4328.14	3769.86	616.763
1029.31	2819.5	3496.65	4185.09	3989.22	4327.25	3763.54	614.174
1031.31	2809.6	3484.83	4157.46	4002.18	4324.72	3755.76	615.309
1033.31	2783.38	3477.61	4126.72	4022.62	4321.26	3746.32	622.707
1035.31	2771.96	3468.31	4099.64	4048.1	4307.13	3739.03	623.861
1037.31	2778.49	3458.45	4081.31	4077.86	4289.39	3737.1	619.717
1039.31	2783.4	3462.32	4070.86	4111.93	4274.91	3740.68	617.682
1041.31	2784.01	3472.87	4078.3	4144.13	4271.18	3750.1	621.426
1043.3	2795.23	3481.47	4104.15	4173.19	4276.08	3766.02	625.235
1045.3	2825.94	3484.71	4136.73	4208.21	4270.07	3785.13	622.112
1047.3	2861.9	3474.27	4179.65	4242.74	4264.08	3804.53	620.798
1049.3	2888.91	3458.39	4226.18	4278.58	4264.14	3823.24	626.535
1051.3	2915.61	3446.13	4263.38	4311.46	4266.09	3840.53	631.015
1053.3	2938.06	3435.62	4282.96	4339.57	4277.87	3854.82	635.105
1055.3	2971.38	3431.26	4281.36	4352.34	4286.04	3864.48	627.458
1057.3	3000.11	3418.07	4264.27	4353.2	4282.06	3863.54	616.332
1059.29	3002.96	3393.35	4236.92	4346.07	4271.82	3850.23	612.316
1061.29	2987.69	3368.75	4204.71	4322.44	4252.59	3827.24	609.034
1063.29	2950.19	3348.67	4170.68	4292.26	4229.95	3798.35	610.42
1065.29	2921.19	3338.85	4140.37	4262.57	4202.94	3773.18	606.949
1067.29	2905.87	3334.5	4116.3	4239.88	4187.97	3756.9	602.272
1069.29	2897.07	3325.14	4107.31	4220.66	4184.33	3746.9	601.202
1071.29	2890.14	3327.14	4106.33	4206.64	4191.98	3744.45	601.84
1073.28	2872.26	3345.6	4118.18	4203.04	4214.64	3750.74	610.464
1075.28	2835.86	3361.82	4109.09	4189.04	4248.19	3748.8	623.744
1077.28	2823.35	3365.05	4101.58	4180.25	4299.74	3753.99	635.951
1079.28	2831.29	3356.58	4107.66	4180.63	4372.45	3769.72	651.474
1081.28	2844.87	3331.85	4119.66	4182.79	4454.93	3786.82	672.348
1083.28	2853.31	3303.78	4123.73	4193.93	4539.47	3802.84	698.07
1085.28	2866.41	3285.36	4130.8	4208.29	4604.99	3819.17	717.416
1087.28	2867.57	3281.17	4147.95	4228.2	4653.63	3835.7	735.752
1089.27	2856.56	3283.74	4159.01	4253.14	4692.19	3848.93	754.133
1091.27	2828.15	3271.35	4171.49	4279.34	4713.49	3852.76	776.575
1093.27	2801.37	3249.11	4182.89	4315.73	4714.2	3852.66	796.117
1095.27	2781.32	3237.65	4187.19	4343.62	4707.76	3851.51	807.798
1097.27	2763.48	3225.06	4177.47	4349.81	4686.9	3840.55	810.568
1099.27	2744.67	3218.04	4153.62	4332.29	4648.84	3819.49	803.028
1101.27	2740.59	3206.37	4124.63	4299.47	4598.69	3793.95	785.387
1103.26	2734.71	3188.98	4102.12	4261.97	4539.49	3765.45	767.098
1105.26	2740.2	3185.55	4090.06	4221.67	4473.72	3742.24	741.601
1107.26	2752.47	3186.84	4086.1	4199.57	4420.93	3729.18	720.293
1109.26	2772.48	3194.91	4094.98	4197.97	4387.54	3729.58	704.934
1111.26	2796.2	3210.13	4118.17	4212.02	4360.12	3739.33	693.159
1113.26	2807.1	3229.97	4136.46	4239.81	4344.61	3751.59	689.618
1115.26	2807.71	3251	4142.13	4283	4344.77	3765.72	694.132
1117.26	2800.14	3262.17	4150.13	4316.3	4348.76	3775.5	702.901
1119.25	2801.71	3261.55	4157.46	4335.77	4355.03	3782.3	708.491
1121.25	2814.98	3257.14	4158.49	4333.19	4353.15	3783.39	703.983
1123.25	2830.6	3263.13	4150.63	4315.49	4349.16	3781.8	692.198
1125.25	2862.96	3268.11	4134.19	4291.71	4344.43	3780.28	672.473
1127.25	2901.95	3272.35	4115.92	4266.47	4333.6	3778.06	648.965
1129.25	2944.63	3269.02	4084.81	4240.48	4322.8	3772.34	624.146
1131.25	2984.18	3252.32	4042.22	4212.32	4311.12	3760.43	601.581
1133.24	3007.7	3236.72	4002.36	4186.87	4295.06	3745.74	584.383
1135.24	3005.22	3226.77	3968.75	4161.53	4280.52	3728.56	575.505
1137.24	2990.79	3218.48	3942.13	4142.92	4269.42	3712.75	572.95
1139.24	2989.69	3219.02	3928.02	4141.24	4272.74	3710.14	572.292
1141.24	2968.64	3216.16	3930.92	4147.87	4277.19	3708.16	582.174
1143.24	2940.26	3216.08	3944.99	4155.64	4302.57	3711.91	600.288
1145.24	2938.71	3210.86	3962.2	4153.09	4329.99	3718.97	609.906
1147.24	2956.12	3209.26	3971.79	4144.27	4328.63	3722.01	603.774
1149.23	3011.38	3218.98	3976.24	4147.8	4314.83	3733.85	581.959
1151.23	3067.49	3216.85	3979.33	4166.71	4300.07	3746.09	565.425
1153.23	3101.19	3201.79	3979.28	4202.22	4292.53	3755.4	564.083
1155.23	3107.07	3188.33	3976.25	4243.28	4298.34	3762.65	575.156
1157.23	3092.8	3187.57	3977.7	4298.14	4307.3	3772.7	593.411
1159.23	3039.96	3189.09	3988.41	4356.18	4328.24	3780.38	627.06
1161.23	2953.15	3198.29	4000.89	4415.05	4344.16	3782.31	669.403
1163.22	2872.67	3212.59	4017.47	4454.99	4351.04	3781.75	704.144
1165.22	2802.71	3218.75	4024.45	4482.35	4355.01	3776.65	733.779
1167.22	2765.92	3215.92	4022.45	4489.87	4353.35	3769.5	747.901
1169.22	2763.43	3204.74	4023.98	4480.35	4335.74	3761.65	745.24
1171.22	2767.63	3195.68	4035.86	4445.93	4311.82	3751.38	733.822
1173.22	2781.14	3198.6	4053.12	4395.85	4285.12	3742.77	713.762
1175.22	2786.17	3197.53	4065.61	4339.18	4248.33	3727.36	694.03
1177.22	2777.51	3199.1	4067.54	4281.72	4229.62	3711.1	681.042
1179.21	2769.82	3201.73	4061.34	4228.37	4223.3	3696.91	670.271
1181.21	2761.74	3194.83	4057.19	4181.29	4214.03	3681.82	662.82
1183.21	2767.78	3180.67	4049.05	4130.39	4196.65	3664.91	649.292
1185.21	2771.3	3171.96	4031.94	4094	4180.86	3650.01	637.467
1187.21	2778.89	3167.68	4010.42	4082.96	4162.12	3640.42	626.625
1189.21	2798.45	3157.33	3997.36	4088.06	4153.46	3638.93	619.128
1191.21	2811.95	3138.49	3995.29	4110.58	4152.28	3641.72	621.948
1193.2	2822.02	3121.51	3998.94	4147.18	4155.29	3648.99	630.298
1195.2	2825.51	3119.56	4007.28	4188.8	4165.42	3661.31	641.116
1197.2	2829.98	3121.93	4025.04	4228.46	4177.12	3676.51	652.096
1199.2	2825.07	3137.03	4052.55	4259.72	4193.29	3693.53	663.917
1201.2	2804.71	3152.61	4081.49	4287.17	4212.47	3707.69	680.776
1203.2	2778.11	3163.54	4102.6	4298.55	4230.4	3714.64	696.108
1205.2	2771.39	3171.04	4131.36	4293.67	4245.09	3722.51	702.712
1207.2	2772.07	3180.2	4146.75	4276.35	4255.08	3726.09	701.377
1209.19	2785.87	3189.82	4161.45	4246.35	4257.2	3728.14	691.712
1211.19	2793	3200.44	4173.26	4203	4258.03	3725.54	681.419
1213.19	2798.13	3202.16	4154.08	4159.31	4254.83	3713.7	668.069
1215.19	2807.75	3205.04	4140.74	4128.34	4250.53	3706.48	656.067
1217.19	2820.7	3208.34	4122.89	4102.2	4244.67	3699.76	642.684
1219.19	2826.19	3204.03	4105.63	4086.93	4243.75	3693.31	636.24
1221.19	2805.14	3202.82	4095.96	4076.42	4247.63	3685.59	641.346
1223.18	2785.26	3201.02	4093.31	4076.29	4263.78	3683.93	651.646
1225.18	2788.23	3195.85	4082.18	4084.03	4284.47	3686.95	655.7
1227.18	2792.81	3192.02	4072.16	4110.54	4308.43	3695.19	662.977
1229.18	2782.44	3199.58	4070.08	4138.04	4325.89	3703.21	673.212
1231.18	2773.1	3215.47	4073.88	4166.75	4344.14	3714.67	682.898
1233.18	2743.1	3223.86	4087.74	4184.63	4362.39	3720.34	700.76
1235.18	2704.71	3223.57	4106.98	4187.14	4378.59	3720.2	720.931
1237.18	2691.01	3223.23	4116.64	4203.57	4371.62	3721.21	728.247
1239.17	2689.67	3224.09	4120.76	4224.78	4364.05	3724.67	731.028
1241.17	2685.29	3228.62	4121.61	4253.13	4353.51	3728.43	734.604
1243.17	2697.2	3228.57	4127.45	4270.92	4350.34	3734.9	733.718
1245.17	2709.14	3229.72	4134.03	4278.2	4359.39	3742.1	733.418
1247.17	2718.84	3226.51	4156.44	4274.92	4368.52	3749.05	734.952
1249.17	2728.57	3216.6	4188.79	4264.68	4374	3754.53	737.316
1251.17	2727.52	3193.52	4224.82	4241.76	4374.69	3752.46	743.745
1253.16	2743	3165.37	4249.32	4212.25	4373.81	3748.75	742.964
1255.16	2751.61	3136.39	4258.07	4177.33	4369.09	3738.5	741.056
1257.16	2777.77	3104.61	4251.47	4133.02	4356.83	3724.74	728.864
1259.16	2796.83	3077.49	4247.47	4083.44	4340.69	3709.18	717.644
1261.16	2792.88	3059.11	4251.81	4048.8	4324.55	3695.43	715.84
1263.16	2798.53	3040.35	4249.55	4037.76	4306.74	3686.59	712.584
1265.16	2815.7	3025.91	4251.78	4029.96	4287.13	3682.1	705.841
1267.16	2825.62	3035.23	4264.72	4037.78	4281.07	3688.89	702.938
1269.15	2834.95	3052.44	4287.09	4047.81	4277.94	3700.05	701.301
1271.15	2856.27	3069.02	4326.58	4062.59	4275.51	3717.99	700.655
1273.15	2888.9	3073.08	4383.12	4079.5	4278.43	3740.61	704.97
1275.15	2929.81	3076.9	4401.11	4104.57	4289.11	3760.3	700.989
1277.15	2992.15	3077.97	4398.66	4128.51	4308.71	3781.2	688.708
1279.15	3066.88	3070.19	4384.75	4136.21	4340.59	3799.72	674.034
1281.15	3142.66	3064.51	4360.35	4147.29	4383.76	3819.72	660.772
1283.14	3215.28	3063.96	4335.53	4170.41	4434.99	3844.03	652.146
1285.14	3273.36	3064.37	4315.7	4193.12	4488.01	3866.91	649.993
1287.14	3322.29	3070.94	4295.44	4219.78	4532.58	3888.2	647.917
1289.14	3367.73	3079.86	4275.08	4234.52	4563.75	3904.19	642.066
1291.14	3402.89	3091.98	4247.95	4241.04	4575.03	3911.78	630.946
1293.14	3414.53	3090.78	4217.7	4240	4570.87	3906.78	623.878
1295.14	3402.48	3081.27	4195.37	4237.31	4540.75	3891.44	618.276
1297.14	3367.63	3077.99	4181.55	4226.98	4506.33	3872.1	614.216
1299.13	3329.42	3081.68	4170.05	4227.01	4461.79	3853.99	608.294
1301.13	3309.93	3084.14	4145.37	4230.46	4423.61	3838.7	599.705
1303.13	3296.49	3096	4124.19	4229.14	4382.68	3825.7	586.219
1305.13	3306.01	3115.62	4108.33	4225.1	4340.5	3819.11	565.354
1307.13	3320.45	3143.17	4098.88	4216.96	4305.55	3817	542.843
1309.13	3312.49	3164.88	4100.32	4200.01	4277.75	3811.09	528.886
1311.13	3300.61	3175.9	4104.41	4168.57	4249.42	3799.78	517.053
1313.12	3270.88	3188.76	4122.18	4141.34	4214.27	3787.49	511.06
1315.12	3243.13	3191.85	4146.32	4115.45	4180.03	3775.36	510.092
1317.12	3214.15	3168.37	4173.49	4102.97	4151.05	3762.01	521.891
1319.12	3177.55	3132.48	4206.42	4096.31	4138.58	3750.27	545.038
1321.12	3146.64	3098.31	4229.68	4101.96	4132.19	3741.76	567.55
1323.12	3133.97	3081.67	4234.16	4116.34	4133.33	3739.89	579.05
1325.12	3138.57	3089.99	4219.5	4135.58	4138.39	3744.41	576.463
1327.12	3168.45	3100.28	4201.49	4149.57	4146.47	3753.25	565.901
1329.11	3245.52	3113.73	4186.43	4155.42	4160.66	3772.35	543.213
1331.11	3364.88	3111.58	4176.39	4157.93	4170.4	3796.23	517.242
1333.11	3509.29	3102.96	4163.14	4157.6	4173.73	3821.34	491.815
1335.11	3669.57	3098.62	4141.7	4151.56	4193.67	3851.02	472.031
1337.11	3778.25	3096.09	4118.05	4140.37	4221.77	3870.91	465.221
1339.11	3873.35	3088.16	4094.93	4125.3	4252.68	3886.88	466.927
1341.11	3922.05	3076.59	4075.48	4106.97	4280.18	3892.25	473.379
1343.1	3923.69	3056.8	4065.31	4095.96	4304.12	3889.17	484.77
1345.1	3869.35	3036.12	4063.29	4080.88	4317.45	3873.42	494.303
1347.1	3763.52	3016.96	4062.67	4067.69	4318.5	3845.87	503.354
1349.1	3635.88	3008.48	4067.3	4061.45	4307.32	3816.08	512.185
1351.1	3488.67	3001.18	4086.9	4040.83	4291.61	3781.84	528.06
1353.1	3348.32	2998.69	4110.17	4018.92	4275.85	3750.39	548.72
1355.1	3291.45	3004.34	4118	4005.89	4272.1	3738.36	556.571
1357.1	3250.6	3016.09	4110.79	4007.97	4271.94	3731.48	560.236
1359.09	3217.06	3032.37	4106.94	4017.65	4273.02	3729.41	563.357
1361.09	3204.49	3044.2	4107.32	4023.08	4278.09	3731.43	564.613
1363.09	3182.74	3056.15	4109.54	4032.4	4283.55	3732.88	569.088
1365.09	3169.29	3060.76	4113.57	4034.34	4288.2	3733.23	573.055
1367.09	3150.22	3059.42	4110.9	4036.41	4291.02	3729.59	578.692
1369.09	3107.24	3062.81	4112.54	4036.45	4287.02	3721.21	588.028
1371.09	3063.17	3075.41	4118.82	4029.59	4281.81	3713.76	595.243
1373.08	3041.74	3103.55	4121.72	4022.36	4274.09	3712.69	591.524
1375.08	3042.59	3129.68	4121.71	4007.86	4268.43	3714.05	581.42
1377.08	3041.35	3140.94	4106.79	3998.96	4257.39	3709.09	572.601
1379.08	3038.82	3146.59	4075.92	3999.05	4253.6	3702.8	565.819
1381.08	3019.33	3143.66	4046.87	4001.23	4242.38	3690.69	565.16
1383.08	2996.78	3133.65	4020.54	4007.84	4231.83	3678.13	568.6
1385.08	2979.73	3117.94	3998.85	4018.53	4220.95	3667.2	573.229
1387.08	2970.33	3101.85	3980.11	4039.94	4223.01	3663.05	581.15
1389.07	2954.5	3080.34	3959.1	4072.29	4232.61	3659.77	596.042
1391.07	2940.79	3054.62	3933.28	4121.98	4253.39	3660.81	617.243
1393.07	2930.77	3024.03	3911.27	4184.09	4273.36	3664.7	642.29
1395.07	2928.18	2994.94	3896.17	4262.37	4284.16	3673.17	668.057
1397.07	2924.01	2985.48	3876.18	4343.77	4288.44	3683.57	689.761
1399.07	2925.59	2986.26	3858.42	4425.65	4281.34	3695.45	706.868
1401.07	2922.17	2996.43	3858.09	4499.56	4268.12	3708.87	722.266
1403.06	2914.3	3009.22	3871.82	4553.91	4254.61	3720.77	734.611
1405.06	2897.63	3024.9	3893.04	4593.29	4247.47	3731.27	746.596
1407.06	2881.86	3034.28	3927.01	4610.41	4262.41	3743.2	758.27
1409.06	2860.75	3043.5	3956.41	4603.19	4285.92	3749.95	766.105
1411.06	2843.56	3060.58	3972.74	4580.41	4309.99	3753.45	766.428
1413.06	2841.26	3068.12	3969.23	4536	4334.23	3749.77	757.95
1415.06	2839.97	3073.23	3960.95	4483.37	4349.2	3741.34	746.185
1417.06	2842.84	3087.09	3957.91	4426.84	4357.69	3734.47	730.035
1419.05	2853.74	3101.42	3941.55	4358.34	4353.55	3721.72	705.511
1421.05	2865.23	3111.62	3927.59	4295.72	4345.37	3709.1	682.972
1423.05	2869.36	3112.68	3923.37	4238.95	4339.26	3696.73	667.808
1425.05	2857.86	3115.31	3929.74	4187.18	4335.32	3685.08	660.248
1427.05	2849.02	3137.23	3939.05	4137.71	4336.67	3679.94	650.564
1429.05	2851.77	3182.1	3952.53	4090.64	4344.86	3684.38	636.143
1431.05	2848.36	3248.99	3968.87	4058.7	4355.68	3696.12	624.4
1433.04	2843.27	3337.94	3990.66	4046.91	4365.02	3716.76	614.562
1435.04	2833.97	3436.26	4011.71	4039.42	4370.56	3738.38	607.085
1437.04	2829.84	3550.86	4041.09	4031.6	4370.28	3764.73	598.76
1439.04	2827.31	3664.26	4059.31	4026.06	4369.29	3789.25	592.96
1441.04	2828.57	3762.74	4082.75	4035.69	4362.98	3814.54	590.858
1443.04	2831.58	3823.17	4104.48	4052.03	4365.79	3835.41	593.391
1445.04	2824.9	3834.49	4125.26	4070.63	4360.2	3843.1	599.079
1447.04	2814.84	3786.55	4147.61	4085.17	4336.24	3834.08	603.037
1449.03	2810.19	3706.44	4159.19	4097.2	4302.2	3815.04	603.51
1451.03	2811.3	3619.61	4157.53	4111.19	4261.32	3792.19	601.507
1453.03	2819.82	3518.91	4153.82	4119.89	4207.97	3764.08	597.342
1455.03	2831.99	3440.07	4155.63	4123.48	4168.23	3743.88	595.306
1457.03	2850.53	3409.95	4160.37	4139.5	4137.15	3739.5	590.367
1459.03	2864.2	3376.5	4176.01	4165.93	4122.07	3740.94	595.117
1461.03	2875.61	3340.6	4192.77	4188.76	4123.05	3744.16	604.093
1463.02	2869.37	3296.88	4176.81	4206.46	4127.62	3735.43	614.995
1465.02	2856.29	3260.54	4163.65	4208.67	4136.64	3725.16	625.735
1467.02	2849.39	3232.29	4158.15	4207.26	4147.7	3718.96	634.062
1469.02	2839.95	3212.49	4161.21	4189.16	4157.11	3711.98	639.84
1471.02	2824.61	3192.39	4167.65	4165.8	4168.54	3703.8	647.898
1473.02	2808.67	3173.53	4159.76	4141.11	4183.77	3693.37	654.104
1475.02	2814.22	3157.14	4146.59	4119.6	4194.84	3686.48	651.686
1477.02	2814.63	3138.04	4137.39	4097.87	4205.3	3678.65	652.371
1479.01	2810.91	3112.58	4123.34	4086.83	4200.17	3666.76	653.653
1481.01	2811.1	3082.61	4106.56	4077.83	4179.06	3651.43	651.357
1483.01	2814.05	3061.22	4096.67	4070.02	4157.03	3639.8	647.682
1485.01	2812.08	3035.29	4094.01	4061.68	4126.84	3625.98	646.353
1487.01	2800.26	3002.92	4086.4	4067.27	4101.07	3611.59	652.191
1489.01	2793.95	2976.29	4063.06	4085.45	4070	3597.75	653.778
1491.01	2790.36	2961.68	4040.34	4099.55	4049.14	3588.21	653.346
1493	2789.71	2955.74	4025.34	4102.74	4035.68	3581.84	650.669
1495	2791.37	2958.99	4015.76	4096.3	4029.69	3578.42	645.416
1497	2789.18	2971.91	4008.64	4088.31	4029.93	3577.59	640.252
1499	2787.38	2990.85	4010.4	4082.7	4033.5	3580.97	636.187
1501	2785.58	3011.04	4018.26	4084	4045.18	3588.81	635.79
1503	2771.69	3030.43	4048.79	4085.48	4064.17	3600.11	644.799
1505	2759.61	3051.23	4102.03	4093.79	4086.62	3618.65	659.229
1507	2747.15	3069.74	4178.42	4110.35	4108.62	3642.86	680.636
1508.99	2718.01	3090.1	4256.04	4122.65	4136.66	3664.69	708.614
1510.99	2701.04	3109.2	4310.51	4130.54	4168.33	3683.92	728.542
1512.99	2694.56	3111.3	4294.39	4142.55	4189.75	3686.51	732.39
1514.99	2696.86	3094.38	4251.7	4155.56	4206.72	3681.04	731.425
1516.99	2695.68	3069.34	4198.62	4155.28	4215.9	3666.96	728.524
1518.99	2695.21	3051.08	4145.87	4153.42	4208.79	3650.88	721.438
1520.99	2694.39	3048.31	4104.11	4144.13	4184.45	3635.08	708.894
1522.98	2703.11	3050.72	4097.01	4132.99	4154.32	3627.63	696.541
1524.98	2721.88	3051.18	4096.39	4118.16	4121.98	3621.92	681.404
1526.98	2725.92	3051.08	4081.89	4102.46	4094.11	3611.09	669.617
1528.98	2728.74	3058	4063.39	4092.33	4081.32	3604.76	659.837
1530.98	2735.17	3066.95	4046.85	4088.81	4076.8	3602.91	651.534
1532.98	2736.61	3074.12	4033.63	4085.44	4082.65	3602.49	647.805
1534.98	2732.84	3073.45	4020.56	4074.86	4099.7	3600.28	648.32
1536.98	2723.47	3073.51	4005.64	4064.83	4131.97	3599.88	653.665
1538.97	2711.42	3074.79	3996	4047.46	4173.39	3600.61	661.671
1540.97	2701.91	3071.85	3994.19	4034.33	4216.94	3603.84	672.698
1542.97	2691.5	3080.66	3986.85	4020.8	4254.05	3606.77	679.956
1544.97	2680.78	3100.77	3981.84	4004.45	4288.39	3611.25	684.987
1546.97	2678.01	3098.64	3978.44	3992.83	4320.63	3613.71	692.337
1548.97	2672.47	3085.72	3967.9	3986.17	4344.54	3611.36	700.529
1550.97	2665.41	3079.49	3960.26	3982.61	4347.07	3606.97	703.286
1552.96	2663.42	3087.14	3953.79	3978.9	4340.92	3604.83	699.604
1554.96	2660.92	3099.08	3950.34	3978.23	4336.8	3605.07	696.66
1556.96	2651.31	3117.82	3954.94	3973.24	4332.19	3605.9	695.291
1558.96	2641.46	3157.79	3967.33	3967.73	4332.93	3613.45	692.964
1560.96	2650.42	3214.42	3994.9	3966.76	4344.92	3634.28	687.361
1562.96	2668.96	3287.81	4025.06	3975.57	4357.77	3663.03	678.303
1564.96	2696.24	3372.47	4050.04	3991.79	4370	3696.11	665.45
1566.96	2723.69	3453.21	4058.96	4005.23	4372.76	3722.77	649.254
1568.95	2749.64	3502.15	4071.32	4029.2	4366.6	3743.78	637.052
1570.95	2765.23	3506.5	4091.27	4058.99	4357.21	3755.84	634.34
1572.95	2766.01	3455.8	4107.54	4088.29	4345.65	3752.66	642.618
1574.95	2755.35	3375.79	4123.45	4113.14	4339.91	3741.53	661.125
1576.95	2735.69	3291.7	4144.41	4129.64	4343.29	3728.94	687.082
1578.95	2740.64	3195.71	4169.4	4138.11	4353.75	3719.52	709.305
1580.95	2750.7	3139.18	4204.87	4132.38	4367.65	3718.95	724.827
1582.94	2758.57	3121.58	4252.59	4113.4	4392.17	3727.66	736.95
1584.94	2764.78	3121.43	4318.31	4089.02	4425.84	3743.88	751.706
1586.94	2773.36	3122.71	4405.2	4063.1	4476	3768.07	774.606
1588.94	2771.87	3130.04	4508.32	4030	4547.2	3797.48	809.134
1590.94	2772.94	3122.67	4623.54	4002.79	4628.45	3830.08	853.637
1592.94	2768.46	3103.65	4735.74	3979.64	4724.87	3862.47	907.296
1594.94	2759.76	3089	4818.86	3955.18	4838.91	3892.34	960.008
1596.94	2744.92	3081.7	4828.4	3938.4	4939.57	3906.6	993.446
1598.93	2729.88	3079.33	4801.72	3930.87	4986.28	3905.62	1004.56
1600.93	2726.01	3082.71	4750.44	3932.11	5006.19	3899.49	999.268
1602.93	2719.11	3088.95	4680.5	3934.32	4999.95	3884.56	983.789
1604.93	2700.9	3096.84	4600.36	3940.05	4972.02	3862.04	963.98
1606.93	2687.35	3092.65	4510.77	3948.45	4927.14	3833.27	939.474
1608.93	2686.02	3080.8	4415.48	3952.62	4857.93	3798.57	905.468
1610.93	2696.4	3061.27	4325.7	3959.32	4791.61	3766.86	872.239
1612.92	2706.24	3048.8	4266.42	3964.83	4744.82	3746.22	849.054
1614.92	2721.21	3048.97	4224	3971.03	4684.43	3729.93	820.75
1616.92	2731.64	3059.29	4171.22	3979.19	4610.27	3710.32	786.808
1618.92	2734.47	3071.03	4134.02	3993.86	4533.26	3693.33	757.74
1620.92	2731.35	3086.77	4109.35	4005.24	4451.58	3676.86	730.971
1622.92	2727.8	3100.64	4107.53	4024.56	4391.32	3670.37	715.781
1624.92	2737.19	3107.92	4111.11	4048.84	4362.7	3673.55	707.802
1626.92	2751.44	3106.8	4115.36	4075.04	4328.74	3675.48	699.491
1628.91	2757.43	3097.23	4122.12	4089.69	4301.7	3673.63	696.487
1630.91	2755.69	3089.01	4130.39	4106.23	4284.69	3673.2	698.848
1632.91	2759.14	3088.4	4146.27	4112.02	4277.13	3676.59	699.739
1634.91	2757.87	3093.64	4156.76	4115.72	4269.94	3678.78	699.876
1636.91	2747.19	3102.07	4170.73	4119.63	4262.99	3680.52	703.226
1638.91	2738.22	3109.86	4196.91	4126.38	4250.44	3684.36	707.77
1640.91	2727.29	3107.69	4230.81	4122.21	4236.88	3684.98	714.864
1642.9	2718.09	3101.03	4247.29	4111.57	4222.55	3680.11	718.143
1644.9	2697.66	3088.33	4222.63	4096.66	4208.84	3662.82	717.865
1646.9	2665.59	3075.32	4180.56	4076.32	4209.53	3641.46	720.291
1648.9	2630.02	3074.6	4130.95	4073.89	4218.23	3625.54	724.969
1650.9	2599.15	3074.74	4088.05	4078.17	4230.71	3614.17	731.648
1652.9	2589.51	3076.17	4060.8	4078.49	4243.89	3609.77	733.295
1654.9	2580.2	3076.12	4053.44	4076.41	4250.02	3607.24	736.425
1656.9	2573.84	3082.3	4052.12	4066.9	4255.77	3606.19	737.1
1658.89	2570.85	3084.79	4055.81	4058.21	4251.81	3604.29	736.049
1660.89	2566.82	3066.81	4065.72	4052.48	4244.35	3599.24	739.692
1662.89	2568.32	3055.84	4076.91	4048.14	4237.74	3597.39	740.848
1664.89	2593.98	3051.49	4079.15	4045.66	4229.91	3600.04	731.084
1666.89	2635.82	3057.2	4068.75	4052.91	4221.42	3607.22	713.273
1668.89	2691.32	3061.73	4062.65	4063.79	4218.57	3619.61	693.775
1670.89	2751	3066.14	4064.87	4074.3	4214.86	3634.23	674.364
1672.88	2803.34	3063.35	4064.08	4095.78	4206.97	3646.7	659.798
1674.88	2856.25	3053.76	4069.25	4126.02	4192.56	3659.57	648.424
1676.88	2910.75	3045.4	4082.55	4156.73	4177.11	3674.51	638.502
1678.88	2956.68	3040.6	4096.62	4193.32	4161.98	3689.84	632.636
1680.88	3001.1	3037.04	4102.84	4235.2	4141.35	3703.51	626.784
1682.88	3026.51	3028.73	4101.86	4276.46	4131.02	3712.92	629.072
1684.88	3023.43	3016.19	4097.25	4314.98	4129.14	3716.2	641.135
1686.88	2991.9	3004.53	4082.35	4347.97	4142.65	3713.88	660.702
1688.87	2938.54	2996.42	4065.73	4367.29	4165.3	3706.66	683.77
1690.87	2874.81	2985.26	4037.75	4372	4186.12	3691.19	705.934
1692.87	2818.68	2979.98	4004.82	4359.52	4197.47	3672.09	718.786
1694.87	2774.43	2980.11	3978.84	4336.25	4197.74	3653.47	723.603
1696.87	2738.37	2994.71	3951.47	4307.88	4183.91	3635.27	719.053
1698.87	2721.72	3018.24	3924	4295.74	4161.58	3624.26	709.1
1700.87	2719.97	3047.91	3908.76	4280.45	4131.66	3617.75	692.583
1702.86	2712.63	3065.83	3901.54	4246.92	4091.16	3603.61	675.16
1704.86	2720.27	3074.11	3899.76	4217.88	4058.23	3594.05	658.01
1706.86	2736.09	3064.22	3910.74	4189.36	4030.99	3586.28	644.614
1708.86	2746.45	3051.99	3912.36	4160.58	4007.01	3575.68	633.124
1710.86	2741.77	3046.89	3907.2	4134.86	3986.59	3563.46	625.641
1712.86	2729.5	3039.96	3909.39	4109.97	3973.32	3552.43	623.553
1714.86	2704.65	3027.77	3909.76	4098.02	3974.31	3542.9	631.84
1716.86	2679.27	3025.7	3902.74	4096.2	3992.46	3539.27	642.462
1718.85	2663.68	3024.71	3900.73	4112.4	4016.88	3543.68	655.474
1720.85	2651.93	3015.22	3909.04	4163.53	4037.05	3555.35	677.296
1722.85	2638.97	3001.84	3928.96	4225.38	4054.1	3569.85	703.98
1724.85	2621.99	2987.34	3963.42	4292.93	4068	3586.74	735.225
1726.85	2612.45	2974.37	4008	4377.72	4073.12	3609.13	768.342
1728.85	2594.12	2957.66	4048.16	4478.74	4070.56	3629.85	808.456
1730.85	2575.24	2933.8	4082.9	4581.67	4066.64	3648.05	851.032
1732.84	2564.32	2914.8	4098.81	4634.47	4059.32	3654.34	874.253
1734.84	2556.95	2909.76	4091.13	4648.41	4061.51	3653.55	880.824
1736.84	2550.37	2922.06	4078.55	4629.3	4068.17	3649.69	874.162
1738.84	2540.69	2942.81	4066.25	4574.53	4083.17	3641.49	858.193
1740.84	2537.9	2964.17	4058.33	4503.55	4107.24	3634.24	838.189
1742.84	2536.44	2985.05	4052.45	4429.58	4132.4	3627.19	818.84
1744.84	2540.28	3006.01	4042.21	4369.54	4167.23	3625.05	803.458
1746.84	2555.92	3028.26	4031.27	4331.47	4191.9	3627.76	788.12
1748.83	2571.05	3050.35	4016.96	4291.51	4205.91	3627.16	770.769
1750.83	2585.96	3070.04	4000.98	4249.44	4208.51	3622.99	751.556
1752.83	2602.32	3098.1	3985.77	4216.25	4201.21	3620.73	730.607
1754.83	2634.98	3124.07	3969.99	4186.76	4194.88	3622.14	705.405
1756.83	2661.46	3129.51	3962.27	4161.13	4192.2	3621.31	688.614
1758.83	2678.25	3122.23	3952.07	4138.98	4200.94	3618.49	680.398
1760.83	2676.28	3120.94	3934.13	4126.54	4209.52	3613.48	678.645
1762.82	2649.02	3116.25	3924.41	4123.64	4218.01	3606.26	689.123
1764.82	2617.33	3103.56	3927.25	4120.35	4224.49	3598.6	703.552
1766.82	2590.84	3081.75	3931.82	4116.48	4232.26	3590.63	718.186
1768.82	2573.68	3063.57	3936.91	4114	4235.62	3584.76	728.293
1770.82	2562.52	3057.42	3955.55	4096.49	4236.32	3581.66	732.615
1772.82	2553.53	3047.62	3971.73	4068.75	4231.3	3574.59	733.731
1774.82	2555.14	3046.19	3991.45	4043.49	4223.81	3572.02	730.338
1776.82	2568.25	3049.59	4008.22	4031.87	4212.71	3574.13	723.304
1778.81	2579.4	3042.64	4026.34	4027.1	4197.89	3574.67	719.497
1780.81	2585.64	3032.5	4053.99	4015.41	4186.75	3574.86	719.507
1782.81	2593.92	3013.64	4097.4	4001.06	4179.83	3577.17	724.198
1784.81	2608.71	3003.63	4153.88	3983.73	4172.27	3584.45	727.776
1786.81	2616.42	2999.11	4208.17	3965.07	4161.68	3590.09	732.57
1788.81	2622.89	3000.05	4260.81	3955.84	4145.32	3596.98	737.446
1790.81	2628.93	2995.97	4290.42	3947.77	4128.72	3598.36	739.082
1792.8	2642.13	2984.99	4301.01	3946.26	4112.52	3597.38	736.496
1794.8	2663.14	2970.73	4277.14	3961.49	4093.59	3593.22	725.651
1796.8	2674.06	2961.37	4235.24	3979.78	4080.94	3586.28	714.727
1798.8	2677.44	2950.78	4197.47	4004.05	4066.07	3579.16	708.496
1800.8	2680.01	2941.43	4171.6	4024.11	4051.43	3573.71	704.807
1802.8	2674.53	2941.02	4151.93	4035.86	4041.46	3568.96	702.746
1804.8	2680.18	2943.13	4123.35	4048.9	4038.41	3566.79	696.358
1806.8	2703.58	2951.08	4098.96	4063.69	4039.29	3571.32	685.11
1808.79	2736.67	2957.59	4081.52	4085.84	4043.42	3581.01	674.677
1810.79	2765.81	2960.61	4070.66	4114.26	4058.26	3593.92	670.911
1812.79	2771.61	2956.5	4066.08	4143.21	4080.02	3603.48	678.784
1814.79	2772.63	2952.11	4066.13	4167.77	4104.36	3612.6	688.752
1816.79	2767.5	2948.77	4061.79	4180.35	4125.35	3616.75	696.742
1818.79	2763.75	2940.24	4045.47	4183.46	4143.89	3615.36	701.445
1820.79	2768.41	2937.89	4036.32	4187.17	4156.94	3617.35	702.451
1822.78	2774.09	2936.69	4038.43	4190.18	4168.44	3621.57	704.174
1824.78	2781.09	2936.83	4052.4	4194.26	4176.06	3628.13	706.421
1826.78	2787.51	2944.59	4065.78	4195.67	4184.77	3635.66	706.589
1828.78	2807.4	2961.96	4076.86	4199.63	4191.98	3647.57	700.247
1830.78	2813.97	2984.78	4090.66	4205.83	4201.19	3659.28	697.849
1832.78	2798.13	3014.34	4090.61	4206.28	4213.62	3664.6	698.202
1834.78	2780.69	3037.53	4080.75	4215.74	4228.16	3668.57	701.6
1836.78	2753.11	3044.7	4069.26	4240.48	4247.09	3670.93	715.815
1838.77	2712.31	3042.37	4063.32	4246.21	4272.35	3667.31	734.952
1840.77	2675.72	3033.41	4063.29	4232.73	4310.87	3663.2	754.267
1842.77	2647.65	3022.98	4072.9	4194.1	4352.66	3658.06	769.116
1844.77	2635.97	3006.83	4086.55	4140.49	4406.03	3655.17	781.748
1846.77	2634.41	3002.82	4097.9	4081.54	4424.94	3648.32	780.646
1848.77	2637.3	3020.39	4096.34	4034.86	4420.59	3641.9	768.568
1850.77	2635.35	3051.31	4066.62	4023.36	4397.6	3634.85	751.442
1852.76	2624.18	3088.69	4034.7	4016.4	4366.52	3626.1	734.877
1854.76	2620.08	3149.78	4007.57	4025	4325.82	3625.65	712.953
1856.76	2627.82	3229.15	3990.68	4030.66	4295.41	3634.74	688.899
1858.76	2636.19	3319.54	3978.62	4032.12	4282.95	3649.89	669.262
1860.76	2648.57	3428.33	3976.93	4030.89	4281.7	3673.28	651.979
1862.76	2661.19	3539.25	3983.74	4037.51	4281.16	3700.57	639.753
1864.76	2678.74	3620.96	3997.34	4036.3	4281.69	3723.01	629.769
1866.76	2692.54	3627.3	4012.1	4039.02	4282.91	3730.77	626.026
1868.75	2696.85	3582.99	4042.4	4036.55	4286.1	3728.98	630.442
1870.75	2712.53	3486.14	4082.77	4042.41	4282.59	3721.29	636.736
1872.75	2731.99	3376.44	4119.53	4057.39	4267.77	3710.63	645.611
1874.75	2739.63	3277.51	4153.56	4079.37	4247.19	3699.45	661.411
1876.75	2746.82	3200.1	4175.52	4102.66	4223.31	3689.68	674.543
1878.75	2755.65	3170.95	4175.08	4107.8	4206.65	3683.23	674.347
1880.75	2774.8	3150.29	4159.06	4113.43	4193.13	3678.14	667.198
1882.74	2792.09	3134.33	4139.05	4113.62	4171.9	3670.2	656.957
1884.74	2811.37	3117.18	4110.57	4104.66	4156.71	3660.1	644.648
1886.74	2817.32	3097.68	4080.62	4095.8	4148.76	3648.04	638.617
1888.74	2807.06	3084.19	4051.72	4092.95	4136.7	3634.53	637.172
1890.74	2768.06	3063.9	4022.64	4086.49	4124.72	3613.16	646.006
1892.74	2734.75	3041.94	3992.64	4086.96	4111.44	3593.54	654.361
1894.74	2725.15	3018.13	3967.41	4083.81	4102.93	3579.49	656.476
1896.74	2729.13	2995.38	3945.69	4072.82	4098.23	3568.25	653.882
1898.73	2734.9	2982.19	3924.44	4060.3	4093.73	3559.11	648.582
1900.73	2733.86	2977.12	3909.17	4040.83	4079.27	3548.05	641.15
1902.73	2729.75	2980.05	3905.28	4025.03	4072.42	3542.5	636.823
1904.73	2722.11	2976.41	3908.59	4008.54	4071.86	3537.5	637.342
1906.73	2715.04	2976.62	3911.98	3996.37	4077.43	3535.49	639.006
1908.73	2705.01	2977.67	3922.11	3986.75	4088.98	3536.1	644.265
1910.73	2701	2978.34	3936.24	3982.87	4101.91	3540.07	649.666
1912.72	2698.52	2979.02	3956.06	3990.87	4106.5	3546.19	655.727
1914.72	2696.87	2979.45	3980.51	4009.57	4098.04	3552.89	661.478
1916.72	2688.35	2983.38	4006.96	4032.69	4073.18	3556.91	666.853
1918.72	2674.36	2993.14	4042.33	4055.05	4043.7	3561.72	674.046
1920.72	2663.53	2997.63	4080.31	4080.55	4012.39	3566.88	683.013
1922.72	2644.84	2998.78	4138.11	4110.26	3987.31	3575.86	701.93
1924.72	2628.89	3000.2	4217.25	4132.79	3985.72	3592.97	727.359
1926.72	2609.12	3000.22	4315.83	4144.44	3993.59	3612.64	759.031
1928.71	2596.74	3002.52	4437.49	4144.47	4012.87	3638.82	794.399
1930.71	2588.85	3009.68	4564.19	4134.27	4036.42	3666.68	829.794
1932.71	2586.65	3008.92	4698.09	4118.58	4055.91	3693.63	868.19
1934.71	2579.71	3002.89	4818.29	4102.56	4066.22	3713.93	906.474
1936.71	2577.32	3000.65	4911.8	4075.56	4065.8	3726.23	933.994
1938.71	2573.58	3002.39	4959.22	4057.21	4061.49	3730.78	947.977
1940.71	2570.68	3004.77	4976.45	4042.18	4055.86	3729.99	952.267
1942.7	2570.5	3001.63	4948.8	4034.01	4041.72	3719.33	942
1944.7	2587.74	2996.66	4882.79	4034.43	4034.68	3707.26	915.751
1946.7	2606.17	2985.83	4791.41	4044.43	4026.43	3690.85	883.52
1948.7	2616.21	2968.45	4676.4	4066.35	4014.4	3668.36	850.175
1950.7	2625.53	2943.77	4547.54	4086.15	4005.95	3641.79	817.078
1952.7	2633.16	2930.93	4426.16	4098.66	4001.07	3618	786.269
1954.7	2642.52	2928.57	4334.86	4102.73	3997.59	3601.25	761.319
1956.7	2639.05	2930.81	4270.07	4105.19	3996.62	3588.35	747.008
1958.69	2644.6	2941.36	4222.85	4109.2	3996.97	3583	733.136
1960.69	2656.56	2961.6	4197.75	4112.21	4002.68	3586.16	720.849
1962.69	2674.01	2983.42	4189.27	4112.89	4010.89	3594.1	710.031
1964.69	2684.4	3001.58	4195.99	4105.2	4012.19	3599.87	702.986
1966.69	2678.76	3015.57	4224.37	4095.66	4012.35	3605.34	706.337
1968.69	2666.61	3029.62	4253.05	4081.83	4017.47	3609.72	712.216
1970.69	2663.17	3042.1	4281.83	4067.63	4033.36	3617.62	717.41
1972.68	2659.25	3047.65	4300.55	4055.36	4060.97	3624.76	724.164
1974.68	2656.45	3051.04	4311.68	4036.93	4103.53	3631.93	731.007
1976.68	2670.33	3059.5	4321.53	4020.95	4167.92	3648.05	735.735
1978.68	2691.74	3071.76	4300.09	4004.69	4251.88	3664.03	735.239
1980.68	2712.89	3082.5	4256.27	3995.39	4344.76	3678.36	735.826
1982.68	2731.77	3093.11	4208.32	3992.88	4449.23	3695.06	743.502
1984.68	2742.77	3102.5	4173.45	3995.95	4558.17	3714.57	761.647
1986.68	2753.05	3104.58	4133.43	4009.27	4663.16	3732.7	783.752
1988.67	2781.69	3103.83	4085.86	4034.4	4764.48	3754.05	802.801
1990.67	2805.66	3095.74	4041.22	4067.14	4845.72	3771.09	822.132
1992.67	2807.48	3074.67	3998.59	4102.55	4903.68	3777.39	845.239
1994.67	2787.79	3049.31	3962.44	4137.55	4943.89	3776.2	870.932
1996.67	2754.7	3025.36	3932.94	4156.57	4963.78	3766.67	892.52
1998.67	2735.73	3003.79	3917.11	4162.14	4969.05	3757.56	904.04
2000.67	2724.18	2995.86	3921.87	4148.36	4954.21	3748.89	902.688
2002.66	2711.03	2996.39	3930.98	4129.22	4921.45	3737.81	893.797
2004.66	2700.44	2995.18	3935.56	4100.93	4860.89	3718.6	874.365
2006.66	2698.42	2999.01	3950.07	4073.54	4782.91	3700.79	846.952
2008.66	2698.71	3010.82	3968.31	4052.04	4686.61	3683.3	813.246
2010.66	2687.61	3035.69	3985.77	4035.95	4590.8	3667.16	782.449
2012.66	2675.25	3077.05	4007.78	4039.52	4512.72	3662.46	758.559
2014.66	2661.79	3137.13	4030.66	4062.48	4447.18	3667.85	739.683
2016.66	2652.28	3204.26	4048.14	4099.99	4399.18	3680.77	726.577
2018.65	2649.94	3264.49	4064.62	4158.85	4358.17	3699.21	719.193
2020.65	2655.79	3313.38	4079.31	4232.14	4321.51	3720.43	716.08
2022.65	2653.74	3345.56	4098.37	4307.13	4287.28	3738.42	721.996
2024.65	2646.65	3370.05	4097.4	4379.87	4256.67	3750.13	730.732
2026.65	2639.85	3398.95	4086.21	4391.91	4238.07	3751	727.831
2028.65	2629.29	3440.92	4081.17	4365.53	4225.25	3748.43	718.666
2030.65	2621.5	3510.07	4082.34	4337.4	4210.79	3752.42	706.908
2032.64	2624.93	3593.53	4085.95	4300.51	4183.55	3757.69	688.091
2034.64	2629.13	3644.68	4095.72	4273.46	4157.58	3760.11	675.754
2036.64	2647.63	3663.27	4106.92	4266.16	4140.18	3764.83	664.773
2038.64	2675.76	3635.68	4103.64	4263.04	4131.09	3761.84	651.895
2040.64	2702.87	3558.2	4091.33	4251.16	4138.93	3748.5	642.688
2042.64	2722.72	3452.74	4074.81	4242.67	4157.94	3730.18	643.493
2044.64	2753.61	3341.42	4062.01	4231.19	4185.36	3714.72	646.52
2046.64	2789.69	3243.78	4054.27	4216.88	4213.81	3703.68	650.654
2048.63	2839.67	3178.6	4047.34	4203.65	4250.63	3703.98	649.893
2050.63	2885.33	3126.42	4040.21	4178.37	4293.15	3704.69	649.801
2052.63	2902.03	3089.84	4041.55	4149.86	4334.52	3703.56	657.768
2054.63	2893.37	3066.92	4040.73	4113.22	4368.05	3696.46	667.931
2056.63	2843.14	3058.36	4035.51	4082.8	4386.11	3681.18	684.468
2058.63	2780.07	3063.93	4040.61	4062.14	4398.68	3669.09	703.808
2060.63	2732.7	3072.47	4051.65	4042.23	4384.69	3656.75	712.334
2062.62	2702.28	3087.14	4061.78	4030.53	4340.68	3644.48	708.21
2064.62	2676.76	3102.57	4063.41	4032.27	4289.18	3632.84	701.959
2066.62	2647.64	3119.22	4059.69	4034.24	4232.68	3618.7	695.799
2068.62	2628.63	3129.11	4051.54	4036.5	4190.59	3607.27	690.696
2070.62	2625.78	3134.36	4043.71	4038.77	4174.77	3603.48	686.588
2072.62	2628.55	3132.91	4029.02	4032.24	4161.97	3596.94	679.807
2074.62	2634.17	3124.05	4018.52	4025.47	4153.42	3591.12	674.8
2076.62	2662.24	3109.15	4019.84	4016.16	4151.68	3591.82	665.921
2078.61	2686.91	3106.11	4021.46	3998.73	4153.32	3593.31	655.784
2080.61	2694.69	3120.21	4027.09	3983.17	4159.77	3596.99	650.44
2082.61	2701.96	3142.93	4037.04	3977.02	4164.64	3604.72	645.609
2084.61	2699.36	3166	4058.78	3981.5	4164.7	3614.07	646.802
2086.61	2692.84	3182.99	4096.74	3985.69	4170.04	3625.66	654.599
2088.61	2685.77	3189.75	4142.85	3996.58	4182.09	3639.41	668.419
2090.61	2673.82	3184.67	4200.54	4013.32	4203.65	3655.2	691.181
2092.6	2665.31	3161.23	4257.88	4027.76	4236	3669.64	718.018
2094.6	2653.98	3128.14	4303.21	4046.55	4287.02	3683.78	749.736
2096.6	2658.68	3105.39	4301.08	4063.49	4345.04	3694.74	766.039
2098.6	2680.4	3092.38	4279.36	4084.18	4410.98	3709.46	774.127
2100.6	2702.28	3076.72	4251.19	4111.5	4483.37	3725.01	785.431
2102.6	2724.95	3063.27	4220.84	4132.27	4558.4	3739.94	797.364
2104.6	2739.83	3049.24	4194.91	4147.68	4645.59	3755.45	816.936
2106.6	2756.22	3038.88	4176.09	4152.38	4727.48	3770.21	835.192
2108.59	2761.87	3034.08	4181.59	4143.34	4813.46	3786.87	859.373
2110.59	2771.31	3046.68	4175.07	4130.69	4891.65	3803.08	875.697
2112.59	2789.45	3063.99	4172.14	4106.73	4962.06	3818.88	886.581
2114.59	2793.48	3083.37	4183.59	4084.76	5030.2	3835.08	903.067
2116.59	2784.85	3107.16	4201.58	4070.76	5082.42	3849.36	918.907
2118.59	2785.63	3117.08	4242.05	4053.03	5095.1	3858.58	923.97
2120.59	2790.93	3122.91	4300.78	4035.75	5069.71	3864.01	918.518
2122.58	2808.17	3123.95	4386.73	4022.57	5029.58	3874.2	910.893
2124.58	2841.69	3113.73	4480.75	4005.77	4971.79	3882.74	899.16
2126.58	2869.2	3092.64	4564.17	3984.02	4909.57	3883.92	891.696
2128.58	2884.53	3071.13	4598.2	3963.54	4834.59	3870.4	877.326
2130.58	2890.68	3052.18	4585.03	3950.21	4741.89	3844	851.823
2132.58	2895	3034.78	4516.27	3945.97	4656.04	3809.61	817.201
2134.58	2878.72	3040.49	4427.31	3947.08	4578.4	3774.4	781.567
2136.58	2831.95	3057.07	4336.1	3954.2	4512.87	3738.44	756.551
2138.57	2785.61	3086	4245.71	3961.08	4462.35	3708.15	734.831
2140.57	2773.21	3121.06	4202.11	3971.98	4411.46	3695.96	711.739
2142.57	2789.46	3149.92	4160.65	3984.1	4358.34	3688.49	681.422
2144.57	2813.16	3157.57	4118	3998.22	4303.48	3678.09	653.101
2146.57	2840.27	3136.13	4083.04	4004.03	4250.09	3662.71	630.849
2148.57	2861.97	3101.63	4054.45	4004.46	4210.04	3646.51	617.354
2150.57	2875.34	3076.29	4018.01	4005.51	4171.91	3629.41	604.427
2152.56	2876.6	3056.05	3986.59	4004.66	4139.78	3612.74	596.437
2154.56	2878.2	3045.66	3970.2	4009.21	4107.58	3602.17	589.577
2156.56	2880.91	3042.1	3963.93	4011.77	4079.19	3595.58	583.066
2158.56	2863.54	3053.2	3971.84	4023.12	4051.85	3592.71	583.642
2160.56	2836.28	3069.45	3989.22	4039.79	4038.74	3594.7	592.031
2162.56	2803.94	3088.22	4011.61	4067.44	4033.91	3601.03	606.595
2164.56	2770.75	3109.77	4040.79	4110.22	4033.83	3613.07	626.488
2166.56	2741.82	3137.59	4071.15	4162.29	4034.61	3629.49	646.719
2168.55	2713.66	3167.57	4107.09	4219.31	4040.6	3649.65	669.903
2170.55	2703.96	3193.57	4139.05	4278.81	4039.95	3671.07	686.973
2172.55	2701.21	3210.49	4158.32	4326.8	4032.91	3685.95	698.208
2174.55	2712.14	3210.13	4161.88	4320.91	4028.38	3686.69	693.119
2176.55	2743.59	3196.54	4159.83	4293.51	4022.44	3683.18	677.208
2178.55	2792.6	3168.02	4156.84	4254.03	4026.69	3679.64	657.016
2180.55	2856.53	3134.83	4153.42	4213.2	4032.66	3678.13	634.052
2182.54	2915.98	3115.97	4153.25	4194.26	4033.26	3682.54	615.434
2184.54	2944.19	3114.04	4155.76	4193.35	4037.02	3688.87	608.006
2186.54	2942.99	3126.14	4167.08	4198.31	4038.74	3694.65	608.987
2188.54	2915.86	3142.38	4189.06	4193.1	4041.46	3696.37	617.388
2190.54	2893.37	3160.63	4202.06	4168.92	4030.73	3691.14	616.951
2192.54	2862.26	3170.35	4203.52	4141.31	4018.96	3679.28	618.511
2194.54	2826.01	3166.2	4190.19	4109.36	4006.36	3659.62	620.958
2196.54	2783.38	3156.02	4153.12	4079.08	3993.93	3633.11	622.325
2198.53	2742.36	3134.38	4115.27	4054.36	3983.14	3605.9	626.679
2200.53	2705.24	3117.82	4072.29	4033.11	3968.45	3579.38	627.967
2202.53	2682.04	3107.91	4038.52	4019.83	3959.26	3561.51	627.502
2204.53	2681.91	3097.26	4012.04	4022.16	3956.25	3553.92	624.488
2206.53	2681.12	3082.86	3990.06	4026.67	3960.97	3548.33	625.084
2208.53	2678.29	3063.04	3966.86	4036.59	3966.99	3542.36	628.714
2210.53	2664.14	3043.67	3954.25	4056.09	3974.92	3538.61	640.425
2212.52	2661.49	3041.27	3947.45	4067.02	3981.01	3539.65	643.966
2214.52	2655.69	3050.29	3933.69	4061.95	3987.16	3537.75	642.1
2216.52	2643.04	3079.21	3924.81	4058.65	3987.48	3538.64	639.171
2218.52	2628.25	3103.97	3922.03	4057.85	3988.42	3540.1	639.649
2220.52	2619.52	3120.83	3923.18	4061.07	3990.33	3542.98	641.11
2222.52	2619.24	3135.46	3934.54	4076.83	3991.01	3551.41	643.828
2224.52	2616.02	3143.91	3945.98	4093.14	3987.56	3557.32	648.118
2226.52	2609.35	3151.93	3953.06	4103.82	3991.44	3561.92	653.189
2228.51	2602.69	3159.03	3960.43	4097.53	3995.36	3563.01	654.977
2230.51	2596.26	3166.39	3972.24	4084.22	3997.48	3563.32	655.707
2232.51	2596.45	3162.27	3987.15	4067.42	3993.66	3561.39	654.714
2234.51	2611.9	3147.06	4005.07	4044.88	3990.2	3559.82	649.553
2236.51	2650.59	3125.43	4014.56	4025.15	3985.36	3560.22	636.357
2238.51	2696.22	3102.83	4020.33	4012.74	3981.36	3562.7	622.393
2240.51	2744.64	3079.77	4026.83	4004.17	3979.67	3567.02	609.615
2242.5	2785.06	3059.03	4033.05	3998.3	3978.04	3570.7	600.328
2244.5	2811.72	3045.92	4037.19	4003.08	3982.78	3576.14	597.007
2246.5	2816.22	3038.77	4049.04	4008.83	3995.24	3581.62	602.618
2248.5	2794.37	3038.35	4070.18	4008.5	4007.99	3583.88	615.953
2250.5	2768.35	3045.84	4082.66	4005.03	4019.74	3584.32	626.637
2252.5	2745.68	3051.98	4099.13	3999.34	4027.43	3584.71	636.457
2254.5	2729.18	3058.15	4123.81	3991.06	4036.25	3587.69	645.909
2256.5	2721.57	3059.04	4148.23	3978.66	4043	3590.1	652.683
2258.49	2724.33	3051.97	4169.46	3967.92	4044.59	3591.65	656.525
2260.49	2727.84	3050.5	4183.1	3961.7	4047.66	3594.16	658.344
2262.49	2734.28	3048.11	4175.01	3956.09	4049.16	3592.53	654.399
2264.49	2740.68	3047.84	4152.08	3959.72	4051.49	3590.36	648.244
2266.49	2747.08	3038.69	4126.84	3974.63	4055.4	3588.53	645.596
2268.49	2741.74	3015.52	4106.93	3995.4	4067.95	3585.51	653.733
2270.49	2730.75	3002.25	4094.26	4007.76	4083.45	3583.69	662.545
2272.49	2724.79	3005.63	4085.47	4023.94	4101.48	3588.26	668.106
2274.48	2715.22	3004.91	4086.54	4038.28	4117.75	3592.54	677.045
2276.48	2723.63	2992.16	4099.48	4035.3	4124.12	3594.94	680.264
2278.48	2737.54	2980.85	4105.61	4030.15	4127.81	3596.39	679.408
2280.48	2756.26	2981.71	4106.71	4025.75	4128.94	3599.88	673.049
2282.48	2773.34	2985.28	4102.42	4021.9	4122.97	3601.18	664.295
2284.48	2782.31	2996.21	4098.52	4024.44	4117.86	3603.87	657.638
2286.48	2769.44	3019.86	4100.58	4033.12	4102.86	3605.17	655.229
2288.47	2748.13	3043.32	4105.01	4043.57	4091.43	3606.29	657.393
2290.47	2733.8	3053.23	4112.81	4061.02	4083.17	3608.8	662.918
2292.47	2724.67	3055.34	4128.3	4072.81	4085.45	3613.31	670.873
2294.47	2720.58	3057.94	4142.29	4075.27	4102.94	3619.8	677.89
2296.47	2717.62	3052.63	4147.13	4072.61	4125.69	3623.13	684.578
2298.47	2713.53	3052.89	4147.66	4061.62	4143.9	3623.92	687.595
2300.47	2709.12	3052.98	4155.95	4043.95	4164.72	3625.35	691.876
2302.47	2699.08	3052.96	4166.96	4012.81	4185.08	3623.38	696.843
2304.46	2681.42	3057.97	4164.83	3979.4	4204.85	3617.7	700.864
2306.46	2654.63	3067.62	4155.73	3954.46	4225.85	3611.66	707.573
2308.46	2623.82	3078.23	4130.23	3946.31	4239.68	3603.65	713.331
2310.46	2610.67	3083.84	4098.92	3938.93	4238.25	3594.12	709.96
2312.46	2611.33	3080.34	4075.41	3944.94	4230.07	3588.42	705.131
2314.46	2612.24	3071	4065.55	3955.14	4218.69	3584.52	703.554
2316.46	2624.06	3052.18	4063.84	3976.07	4201.31	3583.49	701.668
2318.45	2646.46	3022.72	4063.22	4008.51	4190.28	3586.24	702.035
2320.45	2666.74	3003.28	4054.14	4043.37	4179.75	3589.45	700.967
2322.45	2687.27	3000.55	4043.81	4075.64	4166.26	3594.71	695.723
2324.45	2695.37	3006.78	4036.01	4107.65	4161.59	3601.48	695.244
2326.45	2693.95	3005.2	4037.32	4140.93	4167.11	3608.9	703.524
2328.45	2684.19	3006.23	4033.47	4185.89	4173.53	3616.66	715.89
2330.45	2681.57	3017.59	4025.52	4232.4	4181.05	3627.63	724.141
2332.45	2660.9	3034.48	4023.79	4276.48	4185.05	3636.14	737.342
2334.44	2650.19	3057.13	4024.54	4309.55	4185.53	3645.39	743.824
2336.44	2650.78	3085.27	4028.91	4332.81	4181.39	3655.83	743.199
2338.44	2659.88	3116.79	4039.01	4338.88	4180.8	3667.07	736.686
2340.44	2666.3	3136.01	4046.96	4329.42	4187.74	3673.29	731.008
2342.44	2668.58	3152	4054.3	4304.03	4197.63	3675.31	724.412
2344.44	2662.25	3166.01	4058.5	4270.05	4205.84	3672.53	718.967
2346.44	2661.53	3170.46	4056.38	4233.52	4212.33	3666.84	711.947
2348.43	2666.18	3159.34	4056.92	4189.08	4211.53	3656.61	703.551
2350.43	2682.11	3144.11	4059.73	4144.6	4214.77	3649.06	693.576
2352.43	2686.13	3137.4	4057.55	4107.1	4221.93	3642.02	688.045
2354.43	2694.56	3131.04	4048.82	4077.02	4244.8	3639.25	684.983
2356.43	2694.66	3123.46	4044.22	4052.2	4267.08	3636.32	686.832
2358.43	2678.86	3114.37	4046.25	4029.88	4272.19	3628.31	692.118
2360.43	2649.59	3101.14	4055.44	4025.61	4258.88	3618.13	702.351
2362.43	2632.99	3081.13	4056.93	4029.34	4239.24	3607.93	708.124
2364.42	2625.69	3058.23	4058.34	4034.71	4217.98	3598.99	711.291
2366.42	2636.56	3035.33	4072.87	4047.66	4189.57	3596.4	710.391
2368.42	2649.15	3014.69	4086.6	4058.26	4181.14	3597.97	712.599
2370.42	2684.63	2995.88	4104.56	4062.62	4183.7	3606.28	709.221
2372.42	2728.25	2986.82	4118.5	4059.33	4191.27	3616.84	700.704
2374.42	2764.67	2987.64	4117.11	4057.38	4207.53	3626.87	691.891
2376.42	2793.45	2986.31	4111.67	4051.89	4223.87	3633.44	684.976
2378.41	2812.88	2981.16	4105.03	4048.09	4230.1	3635.45	679.909
2380.41	2826.41	2970.3	4097.24	4041.01	4234.46	3633.88	677.035
2382.41	2838.49	2959.25	4094.3	4036.89	4237.99	3633.38	675.853
2384.41	2816.53	2958.62	4097.58	4034.58	4244.39	3630.34	684.157
2386.41	2774.94	2966.31	4102.73	4037.92	4257.13	3627.8	699.063
2388.41	2735.04	2981	4112.77	4050.73	4280.18	3631.94	716.753
2390.41	2715.49	2995.64	4112.96	4048.07	4315.5	3637.53	727.391
2392.41	2711.06	3016.66	4109.94	4055.12	4363.12	3651.18	736.026
2394.4	2701.32	3044.76	4109.57	4066.1	4415.24	3667.4	747.454
2396.4	2683.33	3069.34	4110.43	4079.36	4449.55	3678.4	758.815
2398.4	2662.14	3102.73	4116.92	4086.66	4454.03	3684.49	762.327
2400.4	2646.26	3142.06	4132.76	4093.18	4423.38	3687.53	755.982
2402.4	2630.65	3198.63	4153.3	4101.63	4377.89	3692.42	745.139
2404.4	2621.55	3269.81	4179.83	4110.8	4319.26	3700.25	729.828
2406.4	2614.19	3353.71	4219.67	4117.83	4250.57	3711.2	715.202
2408.39	2611.63	3421.42	4260.73	4121.7	4201.92	3723.48	707.737
2410.39	2623.52	3460.46	4298.48	4117.19	4170.09	3733.95	700.65
2412.39	2636.39	3465.73	4338.63	4107.01	4144.81	3738.52	698.23
2414.39	2662.07	3426.44	4364.57	4095.3	4126.09	3734.89	693.813
2416.39	2706.96	3364.1	4358.31	4080.92	4119.94	3726.05	680.145
2418.39	2770.75	3300.7	4335.57	4061.71	4117.73	3717.29	657.788
2420.39	2839.46	3249.83	4310.3	4051.63	4117.65	3713.77	634.977
2422.39	2908.19	3223.81	4289.45	4039.41	4116.02	3715.37	609.972
2424.38	2966.93	3228.54	4281.86	4026.12	4116.34	3723.96	586.313
2426.38	3000.69	3246.36	4266.71	4019.5	4115.42	3729.74	567.058
2428.38	3011.16	3265.28	4240.64	4013	4115.09	3729.03	552.68
2430.38	2984.83	3276.42	4218.29	4009.6	4109.81	3719.79	552.574
2432.38	2924.69	3273.25	4201.37	4002.48	4099.77	3700.31	566.988
2434.38	2856.06	3264.88	4177.32	3994.39	4091.11	3676.75	584.453
2436.38	2790.36	3247.84	4156.04	3985.38	4079.64	3651.85	602.879
2438.37	2731.03	3224.98	4139.61	3975.49	4082.51	3630.72	623.7
2440.37	2699.06	3209.25	4119.11	3963.5	4094.18	3617.02	634.183
2442.37	2686.05	3185.2	4095.7	3959.3	4100.41	3605.33	638.835
2444.37	2675.83	3157.23	4080.91	3967.96	4102.43	3596.87	645.986
2446.37	2670.45	3131.05	4063.16	3990.18	4106.12	3592.19	653.18
2448.37	2672.28	3116.46	4053.83	4016.75	4105.43	3592.95	657.522
2450.37	2681.86	3105.25	4047.67	4041.31	4103.1	3595.84	658.776
2452.37	2695.22	3092.98	4036.73	4067.43	4095.27	3597.53	657.681
2454.36	2719.02	3096.97	4033.68	4087.58	4083.82	3604.21	649.803
2456.36	2744.08	3093.56	4020.75	4102.47	4072.61	3606.69	640.65
2458.36	2772.43	3087.71	4003.41	4094.62	4057.54	3603.14	625.299
2460.36	2813.45	3083.36	3994.82	4084.36	4049.98	3605.2	607.949
2462.36	2854.62	3071.36	3996.58	4074.64	4058.75	3611.19	597.377
2464.36	2879.93	3060.11	3994.92	4060.06	4075.49	3614.1	592.176
2466.36	2895.03	3042.88	3997.83	4044.1	4096.44	3615.26	593.327
2468.35	2915.96	3025.46	3998.89	4025.31	4120.36	3617.19	593.149
2470.35	2961.14	3005.6	4004.6	4005.22	4145.98	3624.51	588.317
2472.35	3005.66	2989.04	4018.82	3987.39	4175.2	3635.22	586.651
2474.35	3027.3	2990.53	4020.47	3969.56	4200.96	3641.76	584.217
2476.35	3025.1	3000.41	4018.32	3958.69	4221.05	3644.71	585.102
2478.35	3001.56	2999.34	4023.5	3946.23	4233.96	3640.92	594.073
2480.35	2933.63	2992.6	4051.17	3934.88	4243.13	3631.08	619.972
2482.35	2849.7	2995.67	4087.05	3931.3	4246.46	3622.03	650.122
2484.34	2784.31	3007.47	4119.19	3935.06	4240.09	3617.22	672.029
2486.34	2744.82	3021.89	4148.47	3929.43	4214.91	3611.9	680.494
2488.34	2739.07	3033.04	4170.42	3922.78	4176.83	3608.43	675.389
2490.34	2730.64	3045.3	4181.9	3912.25	4128.83	3599.78	666.942
2492.34	2711.62	3058.46	4187	3902.58	4081.07	3588.15	661.312
2494.34	2702.77	3073.76	4192.74	3895.5	4047.53	3582.46	655.62
2496.34	2694.37	3092.87	4190.98	3888.82	4029.67	3579.34	650.48
2498.33	2686.93	3110.66	4185.62	3890.11	4020.93	3578.85	647.151
2500.33	2674.48	3108.11	4170.6	3897.49	4026.53	3575.44	650.295
2502.33	2663.66	3093.24	4139	3894.36	4044.91	3567.03	652.537
2504.33	2654.49	3078.84	4108.77	3893.21	4082.68	3563.6	658.934
2506.33	2636.43	3066.35	4080.06	3899.3	4127.13	3561.85	671.543
2508.33	2620.16	3060.08	4062.53	3911.59	4177.41	3566.35	687.453
2510.33	2604.26	3061.09	4055.56	3934.39	4226.61	3576.38	705.538
2512.33	2592.76	3071.84	4065.61	3964.78	4272.83	3593.56	723.851
2514.32	2580.93	3082.49	4084.54	4002.92	4308.77	3611.93	742.477
2516.32	2574.52	3090.85	4113.41	4044.74	4331.83	3631.07	758.779
2518.32	2581.61	3096.13	4154.22	4084.61	4339.17	3651.15	769.138
2520.32	2592.76	3094.34	4202.63	4113.14	4334.74	3667.52	776.81
2522.32	2615.82	3089.41	4249.61	4141.58	4322.67	3683.82	779.701
2524.32	2647.73	3082.06	4296.75	4167.11	4297.6	3698.25	777.906
2526.32	2681.03	3075.61	4347.65	4182.24	4271	3711.51	775.491
2528.31	2708.65	3061.74	4402.6	4180.16	4234.25	3717.48	774.316
2530.31	2729.34	3050.34	4468.83	4174.64	4195.64	3723.76	778.373
2532.31	2731.64	3046.53	4520.28	4166.85	4155.44	3724.15	784.227
2534.31	2722.99	3041.42	4530.92	4159.4	4135.52	3718.05	787.052
2536.31	2698.76	3032.35	4507.78	4149.31	4130.9	3703.82	788.703
2538.31	2664.39	3027.06	4436.7	4145.62	4134.19	3681.59	783.179
2540.31	2621.42	3033.03	4349.22	4164.47	4149.46	3663.52	781.149
2542.31	2585.05	3042.11	4265.49	4183.66	4165.25	3648.31	779.863
2544.3	2567.91	3048.83	4218.73	4197.11	4180.03	3642.52	780.348
2546.3	2563.43	3049.86	4227.79	4206.48	4188.92	3647.29	786.56
2548.3	2560.68	3043.86	4254.94	4205.2	4187.94	3650.52	793.349
2550.3	2557.17	3041.06	4286.68	4199.68	4188.62	3654.64	800.407
2552.3	2565.65	3041.37	4323.67	4185.69	4191.16	3661.51	802.996
2554.3	2585.31	3047.43	4372.46	4165.11	4198.11	3673.68	803.362
2556.3	2605.61	3055.46	4439.94	4146.96	4207.06	3691.01	808.873
2558.29	2630.41	3057.6	4513.48	4142.77	4223.41	3713.54	819.687
2560.29	2655.91	3063.23	4533.52	4133.18	4242.92	3725.75	816.921
2562.29	2673.53	3058.47	4491.58	4127.67	4271.69	3724.59	805.992
2564.29	2698.09	3051.02	4423.27	4131.64	4314.84	3723.77	792.089
2566.29	2717.07	3057.21	4341.5	4128.21	4363.51	3721.5	776.554
2568.29	2725.21	3063.11	4259.3	4115.38	4412.56	3715.11	766.126
2570.29	2726.83	3061.84	4194.26	4091.82	4436.86	3702.32	757.47
2572.29	2723.75	3052.22	4163.66	4063.52	4429.13	3686.46	750.09
2574.28	2715.65	3050.52	4129.11	4032.98	4404.01	3666.45	737.526
2576.28	2717.57	3048.11	4090.05	4012.69	4361.34	3645.95	718.124
2578.28	2723.86	3040.38	4046.28	4012.16	4311.65	3626.87	698.691
2580.28	2746.86	3025.64	4010.83	4023.66	4252.48	3611.89	676.578
2582.28	2793.1	3004.8	3987.47	4043.9	4198.69	3605.59	653.988
2584.28	2856.01	2977.71	3978.21	4059.6	4160.51	3606.41	634.233
2586.28	2938.91	2950.83	3961.96	4076.89	4141.85	3614.09	614.308
2588.27	3041.56	2935.23	3952.54	4093.22	4135.06	3631.52	592.168
2590.27	3175.5	2931.02	3946.99	4098.6	4136.93	3657.81	563.098
2592.27	3317.5	2926.94	3943.42	4096.17	4150.32	3686.87	538.993
2594.27	3406.52	2923.69	3941.43	4094.81	4171.34	3707.56	530.287
2596.27	3466.27	2931.64	3938.36	4091.84	4193.02	3724.23	523.331
2598.27	3491.66	2944.7	3930.41	4094.71	4217.08	3735.71	520.521
2600.27	3489.84	2952.08	3920.57	4101.11	4254.12	3743.54	526.94
2602.27	3430.35	2957.33	3909.72	4116.36	4309.47	3744.65	548.431
2604.26	3320.74	2971.91	3904.78	4141.73	4387.42	3745.31	585.939
2606.26	3194.22	2989.96	3901.51	4164.72	4495.19	3749.12	639.687
2608.26	3065.1	3012.46	3897.26	4188.32	4631.88	3759	707.846
2610.26	2944.43	3034.04	3897.34	4205.6	4777.78	3771.84	781.788
2612.26	2872.32	3054.65	3909.66	4210.55	4916.54	3792.74	843.077
2614.26	2802.5	3080.29	3928.97	4211.54	5035.64	3811.79	897.928
2616.26	2737.49	3117.39	3952.66	4202.56	5138.02	3829.62	944.214
2618.25	2691.24	3142.81	3987.27	4183.07	5208.79	3842.64	977.072
2620.25	2658.66	3153.48	4023.04	4161.48	5242.97	3847.92	996.461
2622.25	2651.83	3154.92	4053.69	4141.03	5241.7	3848.64	997.715
2624.25	2650.33	3147.87	4076.18	4126.59	5195.22	3839.24	983.476
2626.25	2652.11	3126.07	4096.21	4109.27	5109.18	3818.57	957.529
2628.25	2660.44	3104.3	4101.58	4096.73	4996.89	3791.99	921.114
2630.25	2666.61	3095.13	4101.19	4083.02	4850.11	3759.21	872.731
2632.25	2678.13	3087.66	4087.06	4070.79	4707.26	3726.18	824.263
2634.24	2677.63	3087.59	4063.96	4062.69	4577.37	3693.85	783.246
2636.24	2676.55	3095.6	4042.25	4055.42	4454.79	3664.92	744.943
2638.24	2663.89	3099.75	4019.77	4049.63	4357.28	3638.06	719.576
2640.24	2656.49	3100.13	4009.11	4044.39	4285.92	3619.21	702.419
2642.24	2647.9	3092.61	4013.43	4041.22	4235.06	3606.04	695.1
2644.24	2634.63	3085.84	4033.95	4034.54	4191.93	3596.18	693.495
2646.24	2614.98	3080.52	4052.67	4032.7	4155.51	3587.28	696.427
2648.23	2594.2	3073.25	4075.69	4037.36	4121.38	3580.38	702.955
2650.23	2575.79	3071.35	4095.07	4039.56	4089.76	3574.31	707.696
2652.23	2562.53	3073.12	4109.33	4035.24	4055.11	3567.07	707.901
2654.23	2557.32	3077.42	4124.16	4028.67	4020.32	3561.58	704.994
2656.23	2559.05	3084.52	4139.58	4023.94	3988.78	3559.17	700.532
2658.23	2566.54	3096.64	4148.91	4015.15	3958.31	3557.11	691.785
2660.23	2581.5	3091.21	4148.89	4004.58	3931.63	3551.56	681.802
2662.23	2599.01	3060.92	4145.7	3991.88	3907.01	3540.9	674.677
2664.22	2618.3	3022.28	4137.6	3980.68	3883.38	3528.45	668.232
2666.22	2635.5	2995.61	4129.65	3974.16	3862.6	3519.5	661.936
2668.22	2647.68	2983.46	4129.39	3969.95	3844.52	3515	657.231
2670.22	2658.11	2972.49	4130.65	3977.56	3838.74	3515.51	656.956
2672.22	2651.06	2965.1	4128.16	3989.69	3847.97	3516.39	663.502
2674.22	2626.8	2964.11	4124.93	4006.34	3868.25	3518.09	676.486
2676.22	2601.13	2963.34	4126.68	4025.04	3895.17	3522.27	692.467
2678.21	2589.89	2946.13	4136.26	4041.08	3918.16	3526.31	707.824
2680.21	2586	2924.88	4148.51	4038.11	3945.72	3528.64	719.524
2682.21	2594.51	2918.96	4154.16	4031.84	3971.1	3534.12	721.875
2684.21	2607.23	2916.7	4146.61	4030.76	3989.31	3538.12	719.244
2686.21	2613.87	2912.89	4132.64	4033.42	4003.47	3539.26	717.715
2688.21	2610.41	2916.31	4121.15	4033.66	4020.53	3540.41	718.589
2690.21	2612.69	2932.41	4112.06	4029.73	4037.43	3544.86	714.75
2692.21	2622.75	2954.23	4107.11	4024.44	4056.34	3552.97	708.258
2694.2	2639.51	2975.18	4100.95	4019.4	4073.73	3561.75	699.446
2696.2	2655.91	2990.74	4095.99	4024.55	4087.64	3570.97	693.242
2698.2	2665.67	3015.37	4090.59	4035.36	4097.03	3580.8	687.418
2700.2	2669.95	3028.87	4095.31	4050.06	4104.64	3589.77	687.968
2702.2	2672.47	3033.33	4107	4058.1	4108.88	3595.96	690.508
2704.2	2666.23	3044.22	4113.81	4063.15	4107.84	3599.05	692.321
2706.2	2663.08	3057.28	4119.88	4073.63	4100.66	3602.9	692.385
2708.19	2674.66	3065.77	4126.61	4081.65	4093.23	3608.38	688.094
2710.19	2678.08	3062.38	4118.62	4083.31	4078.72	3604.22	683.851
2712.19	2673.47	3044.23	4100.94	4087.68	4061.14	3593.49	683.475
2714.19	2652.16	3023.18	4084.06	4094.02	4041.99	3579.08	689.686
2716.19	2623.94	3005.9	4071.56	4100.34	4015.45	3563.44	697.186
2718.19	2597.41	2995.69	4058.1	4110.46	3989.11	3550.16	703.525
2720.19	2575.84	3005.05	4050	4120.52	3962.54	3542.79	705.58
2722.19	2568.74	3024.7	4054.57	4126.9	3942.65	3543.51	703.596
2724.18	2582.35	3045.38	4063.65	4115.44	3924.98	3546.36	691.934
2726.18	2615.21	3076.3	4080.08	4108.79	3913.37	3558.75	675.115
2728.18	2634.79	3105.7	4092.25	4089.94	3913.42	3567.22	661.658
2730.18	2649.68	3115.91	4100.81	4066.65	3939.51	3574.51	655.372
2732.18	2660.05	3106.91	4108.02	4042.1	3988.05	3581.03	657.454
2734.18	2673.38	3086.25	4116.47	4018.12	4064.01	3591.65	666.913
2736.18	2681.74	3064.37	4125.63	3996.31	4161.69	3605.95	685.343
2738.17	2682.86	3038.57	4130.27	3979.61	4271.45	3620.55	712.457
2740.17	2666.25	3016.36	4133.33	3966.24	4360.27	3628.49	742.47
2742.17	2638.83	3014.37	4135.5	3951.88	4415.24	3631.16	764.387
2744.17	2613.44	3023.72	4146.23	3943.56	4423.13	3630.01	773.765
2746.17	2588.88	3029.94	4159.94	3940.13	4405.53	3624.88	778.195
2748.17	2570.76	3038.82	4170.5	3933.75	4357.24	3614.21	771.931
2750.17	2566.16	3045.91	4175.74	3916.59	4304.92	3601.86	759.019
2752.17	2568.67	3049.23	4174.42	3895.61	4232.23	3584.03	738.708
2754.16	2577.63	3045.91	4166.52	3877.28	4174.55	3568.38	720.276
2756.16	2600.6	3038.71	4152.63	3863.98	4146.44	3560.47	703.512
2758.16	2622.95	3028.55	4140.33	3865.12	4114.13	3554.22	688.707
2760.16	2651.48	3021.03	4137.27	3892.01	4083.76	3557.11	677.062
2762.16	2685.33	3005.12	4137.45	3931.96	4053.04	3562.58	668.543
2764.16	2712.26	2986.91	4137.21	3989.85	4030.63	3571.37	668.184
2766.16	2735.68	2969.67	4129.13	4058.1	4016.19	3581.75	671.888
2768.15	2753.46	2951.44	4118.5	4121.17	4005.78	3590.07	678.58
2770.15	2748.9	2935.91	4105.9	4189.69	3995.26	3595.13	693.755
2772.15	2734.55	2932.12	4094.15	4247.63	3992.94	3600.28	709.415
2774.15	2724	2944.61	4087.94	4275.45	3996.13	3605.63	715.542
2776.15	2715.19	2962.88	4082.62	4278.94	4006.14	3609.16	715.403
2778.15	2711.27	2982.2	4074.25	4278.72	4021.52	3613.59	713.066
2780.15	2696.16	2993.97	4073.28	4269.66	4035.05	3613.62	715.014
2782.15	2673.69	2997.95	4071.58	4253.52	4046.62	3608.67	719.215
2784.14	2659.77	3000.8	4067.52	4226.32	4044.16	3599.71	716.099
2786.14	2656.16	3008.92	4061.14	4209.12	4021.23	3591.32	707.272
2788.14	2669.61	3021.89	4062.72	4198.63	3998.05	3590.18	694.667
2790.14	2688	3009.62	4070.81	4193.89	3974.19	3587.3	688.089
2792.14	2713.02	2984.57	4086.94	4188.92	3954.07	3585.5	684.424
2794.14	2737.33	2972.65	4099.81	4185.95	3940.56	3587.26	679.352
2796.14	2745.72	2958.14	4112.88	4190.7	3930.32	3587.55	682.291
2798.13	2732.15	2941.4	4128.83	4190.73	3926.96	3584.01	693.029
2800.13	2703.06	2929.77	4146.04	4174.55	3923.49	3575.38	704.201
2802.13	2689.29	2919.2	4157.25	4146.68	3922.29	3566.94	707.227
2804.13	2680.3	2919.11	4146.43	4118.23	3924.31	3557.67	702.29
2806.13	2671.71	2924.62	4130.6	4098.05	3930.24	3551.04	697.23
2808.13	2665.18	2927.13	4125.96	4077.87	3938.75	3546.98	695.039
2810.13	2666.31	2925.38	4125.13	4060.5	3946.4	3544.74	692.721
2812.13	2677.01	2928.15	4125.77	4046.95	3960.75	3547.73	688.472
2814.12	2687.28	2942.72	4129.15	4029.33	3983.64	3554.42	683.044
2816.12	2694.14	2962.96	4140.82	4016.18	4013.78	3565.58	681.428
2818.12	2691.42	2983.24	4155.59	4005.88	4050.51	3577.33	685.513
2820.12	2678.19	2996.98	4168.29	4014.89	4095.57	3590.78	698.859
2822.12	2670.25	3010.66	4183.11	4039.78	4146.65	3610.09	714.752
2824.12	2661.27	3022.7	4187.43	4070.74	4200.77	3628.58	731.097
2826.12	2654.02	3031.53	4189.76	4107.4	4258.64	3648.27	749.246
2828.11	2651.25	3041.23	4182.34	4145.14	4319.73	3667.94	765.436
2830.11	2640.7	3047.85	4171.92	4183.61	4360.88	3680.99	780.86
2832.11	2616.65	3046.73	4169.87	4219.06	4373.23	3685.11	797.299
2834.11	2600.58	3033.69	4174.48	4244.15	4358.03	3682.19	807.054
2836.11	2592.89	3029.76	4185.33	4256.64	4328.72	3678.67	808.289
2838.11	2590.28	3038.49	4194.64	4251.13	4288.84	3672.68	800.077
2840.11	2594.21	3048.71	4199.49	4234.96	4236.17	3662.71	784.722
2842.11	2596.26	3061.32	4201.62	4208.78	4201.66	3653.93	770.986
2844.1	2589.81	3073.59	4208.58	4181.3	4205.32	3651.72	767.936
2846.1	2574.65	3076.06	4229.18	4155.09	4211.53	3649.3	773.248
2848.1	2563.83	3081.03	4256.1	4126.15	4205.39	3646.5	775.558
2850.1	2560.08	3079.75	4295.42	4104.89	4203.81	3648.79	781.554
2852.1	2563.82	3079.21	4363.12	4081.01	4200.85	3657.6	791.054
2854.1	2568.99	3078.67	4455.72	4056.85	4199.77	3672	807.706
2856.1	2575.19	3070.37	4565.47	4033.18	4191.65	3687.17	831.05
2858.09	2580.67	3054.18	4687.69	4015.07	4181.14	3703.75	862.586
2860.09	2585.26	3027.2	4791.17	4007.73	4160.62	3714.4	893.28
2862.09	2584.15	2995.82	4844.95	4002.75	4138.65	3713.26	913.111
2864.09	2583.53	2969.14	4808.39	4008.31	4118.03	3697.48	905.393
2866.09	2579.98	2956.25	4743.38	4010.37	4107.6	3679.52	888.343
2868.09	2568.23	2941.1	4649.7	4006.22	4116.16	3656.28	868.355
2870.09	2563.88	2930.03	4543.31	3998.3	4154.49	3638	847.219
2872.09	2554.59	2937.14	4442.64	3998.86	4226.04	3631.85	834.902
2874.08	2551.71	2943.59	4369.08	4014.09	4345.18	3644.73	842.322
2876.08	2564.83	2939	4310.35	4033.13	4517.2	3672.9	868.243
2878.08	2586.36	2926.74	4259.93	4057.78	4720.69	3710.3	911.172
2880.08	2623.51	2923.54	4225.34	4085.12	4897.11	3750.92	949.491
2882.08	2662.25	2925.95	4199.94	4116.38	4972.13	3775.33	960.381
2884.08	2696.55	2928.95	4174.45	4139.75	4999.34	3787.81	957.814
2886.08	2707.88	2937.27	4147.85	4152.42	4987.6	3786.6	947.593
2888.07	2711.29	2951.26	4119.08	4151.05	4934.09	3773.35	923.756
2890.07	2697.98	2969.67	4090.57	4136.26	4843.65	3747.63	891.191
2892.07	2680.68	2986.12	4062.54	4113.76	4712.15	3711.05	847.808
2894.07	2674.49	3003.13	4039.95	4085.59	4559.22	3672.48	796.245
2896.07	2681.6	3025.44	4024.72	4056	4408.33	3639.22	742.899
2898.07	2688.77	3047.39	4015.53	4033.41	4281.45	3613.31	699.949
2900.07	2682.98	3063.03	4020.28	4025.43	4210.58	3600.46	681.853
2902.07	2676.98	3066.64	4034.95	4029.12	4157.53	3593.05	674.604
2904.06	2658.92	3061.65	4042.23	4048.93	4111.54	3584.65	676.952
2906.06	2624.86	3058.16	4049.31	4078.4	4072.17	3576.58	688.375
2908.06	2592.56	3041.89	4056.98	4123.52	4047.43	3572.47	708.119
2910.06	2556.11	3017.93	4054.17	4179.32	4032.54	3568.02	733.549
2912.06	2524.38	2990.03	4046.96	4247.41	4020.14	3565.78	761.348
2914.06	2502.43	2962.7	4027.93	4325.13	4007.74	3565.19	787.392
2916.06	2497.28	2952.7	4002.08	4396.54	3996.11	3568.94	803.62
2918.05	2506.42	2939.2	3977.16	4460.88	3987.29	3574.19	815.873
2920.05	2522.7	2928.64	3955.26	4480.29	3976.13	3572.6	813.962
2922.05	2529.76	2924.12	3940.43	4474.22	3960.39	3565.79	807.219
2924.05	2547.68	2923.9	3934.08	4437.44	3946.72	3557.96	788.796
2926.05	2560.25	2917.01	3942.02	4380.25	3939.57	3547.82	770.554
2928.05	2569.88	2903.93	3958.71	4305.56	3934.46	3534.51	752.091
2930.05	2584.73	2881.55	3980.88	4234.78	3930.43	3522.47	737.24
2932.05	2601.94	2867.61	4006.3	4199.58	3931.36	3521.36	730.748
2934.04	2614.71	2874.64	4034.95	4189.54	3932.29	3529.23	727.851
2936.04	2626.25	2890.75	4059.16	4179.16	3943.6	3539.78	724.122
2938.04	2625.18	2907.24	4073.3	4173.32	3958.06	3547.42	724.101
2940.04	2609.31	2930.6	4086.04	4172.29	3976.94	3555.04	728.917
2942.04	2596.29	2954.35	4095.69	4176	3992.19	3562.9	732.925
2944.04	2578.33	2971.04	4102.96	4172.78	3984.45	3561.91	735.016
2946.04	2568.42	2985.05	4108.57	4158.51	3961.83	3556.48	730.471
2948.03	2565.27	3004.22	4106.95	4142.56	3939.49	3551.7	721.209
2950.03	2565.22	3016.21	4112.05	4124.34	3923.01	3548.17	714.075
2952.03	2556.09	3029.15	4122.47	4109.26	3915.12	3546.42	712.897
2954.03	2544.37	3045.45	4127.89	4098.26	3905.69	3544.33	711.821
2956.03	2531.43	3057.31	4138.33	4093.56	3896.46	3543.42	714.428
2958.03	2512.62	3063.11	4152.6	4096.22	3889.89	3542.89	722.838
2960.03	2495.85	3045.39	4162.77	4094.56	3884.24	3536.56	732.927
2962.03	2487.44	3013.5	4166.89	4088.71	3886.56	3528.62	741.386
2964.02	2483.08	2984.78	4167.14	4091.83	3893.24	3524.01	749.443
2966.02	2484.87	2962.42	4161.92	4090.95	3900.29	3520.09	752.504
2968.02	2490.96	2947.87	4147.82	4082.3	3909.52	3515.69	749.709
2970.02	2498.72	2951.92	4127.28	4065.41	3907.9	3510.25	738.577
2972.02	2503.79	2972.38	4103.72	4048.19	3907.78	3507.17	724.886
2974.02	2524.49	3007.81	4082.5	4034.45	3909.35	3511.72	704.571
2976.02	2546.24	3062.72	4070.27	4035.22	3907.42	3524.37	684.756
2978.01	2568.42	3133.84	4070.25	4035.78	3906.83	3543.02	665.286
2980.01	2586.09	3227.87	4076.73	4038.8	3912.39	3568.38	647.863
2982.01	2598.94	3339.49	4081.68	4043.78	3937.11	3600.2	634.936
2984.01	2612.28	3443.33	4089.26	4046.64	3981.57	3634.61	628.214
2986.01	2623.52	3520.43	4097.99	4046.65	4039.4	3665.6	628.273
2988.01	2637.11	3557.34	4097.73	4043.36	4101.2	3687.35	629.751
2990.01	2659.04	3542.9	4089.33	4042.63	4162.74	3699.33	630.751
2992.01	2689.21	3498.73	4076.56	4044.54	4176.34	3697.08	622.407
2994	2714.21	3440.07	4067.56	4049.13	4142.42	3682.68	610.443
2996	2729.73	3386.79	4064.54	4063.93	4100.71	3669.14	604.292
2998	2734.89	3336.2	4067.14	4081.03	4049.55	3653.76	603.172
3000	2720.92	3327.28	4072.09	4103.66	4015.39	3647.87	609.262
3002	2695.06	3311.18	4078.66	4125.83	3980.01	3638.15	621.505
3004	2670.11	3281.6	4085.6	4155.18	3967.4	3631.98	640.309
3006	2650.87	3237.95	4097.56	4184.85	3959.32	3626.11	660.917
3007.99	2634.3	3191.39	4112.93	4218.76	3958.13	3623.1	683.938
3009.99	2622.31	3151.11	4125.23	4248.46	3952.16	3619.86	702.814
3011.99	2615.61	3121.59	4136.86	4257.65	3953.41	3617.02	714.509
3013.99	2607.05	3099.62	4149.94	4246.43	3958.17	3612.24	721.831
3015.99	2588	3075.19	4168.09	4205.95	3965	3600.45	728.474
3017.99	2558.79	3063.31	4197.01	4163.56	3976.08	3591.75	739.47
3019.99	2530.9	3045.24	4221.71	4131.21	3987.24	3583.26	752.992
3021.99	2513.82	3023.85	4239.35	4107.25	3986.26	3574.11	762.178
3023.98	2507.49	2991.62	4247.54	4077.15	3976.26	3560.01	765.547
3025.98	2514.79	2961.61	4253.32	4054.94	3964.28	3549.79	764.708
3027.98	2531.89	2939.1	4257.5	4037.18	3947.19	3542.57	759.134
3029.98	2545.02	2925.96	4262.23	4024.99	3936.22	3538.88	755.123
3031.98	2552.67	2923.23	4264.86	4022.12	3923.78	3537.33	751.719
3033.98	2548.04	2922.32	4260.46	4033.64	3912.53	3535.4	752.816
3035.98	2538.52	2935.36	4258.3	4052.11	3904.86	3537.83	754.961
3037.97	2541.59	2955.41	4245.11	4071.18	3891.86	3541.03	748.614
3039.97	2544.96	2970.44	4236.03	4092.37	3875.57	3543.88	744.414
3041.97	2554.56	2974.71	4238.37	4116.5	3857.54	3548.34	743.506
3043.97	2561.85	2970.3	4245.38	4149.3	3841.62	3553.69	748.363
3045.97	2572.26	2958.78	4250.4	4180.5	3843.31	3561.05	754.825
3047.97	2583.31	2948.69	4260.74	4221.84	3854.47	3573.81	765.255
3049.97	2592.97	2939.06	4271.23	4272.92	3860.92	3587.42	778.076
3051.97	2593.42	2920.08	4270.23	4335.38	3870.62	3597.95	796.665
3053.96	2579	2908.46	4249.79	4408.78	3883.97	3606	818.152
3055.96	2559.94	2900.51	4216.84	4485.79	3893.22	3611.26	839.861
3057.96	2550.29	2899.29	4184.84	4575	3896.31	3621.15	861.849
3059.96	2552.71	2898.29	4159.79	4670.29	3885.29	3633.27	883.737
3061.96	2563.49	2910.27	4146.45	4753.34	3866.43	3648	899.771
3063.96	2577.72	2925.77	4139.5	4768.6	3843.22	3650.96	894.775
3065.96	2588.49	2940.83	4134.91	4741.32	3812.56	3643.62	877.79
3067.95	2598	2954.69	4126.92	4685.65	3787.29	3630.51	852.515
3069.95	2595.55	2952.95	4127.74	4604.37	3774.08	3610.94	828.338
3071.95	2590.86	2931.75	4134.29	4501.44	3761.83	3584.03	804.345
3073.95	2587.5	2904.04	4145.05	4405.85	3752.35	3558.96	785.937
3075.95	2583.84	2882.16	4158.8	4356	3743.79	3544.92	780.572
3077.95	2587.95	2857.69	4182.82	4322.92	3740.33	3538.34	780.742
3079.95	2591.82	2848.63	4216.35	4291.9	3733.39	3536.42	780.572
3081.95	2591.03	2861.14	4255.59	4274.75	3734.26	3543.35	782.785
3083.94	2581.74	2882.39	4297.66	4263.34	3732.89	3551.6	788.117
3085.94	2573.4	2898.41	4331.39	4253.19	3738.91	3559.06	793.513
3087.94	2570.2	2907.57	4346.37	4238.32	3747.04	3561.9	793.54
3089.94	2574.42	2916.39	4343.24	4217.49	3756.22	3561.55	785.79
3091.94	2588.1	2929.21	4321.97	4194.32	3760.35	3558.79	769.023
3093.94	2610.55	2949.74	4288.45	4171.06	3767.09	3557.38	745.112
3095.94	2621.38	2970.93	4253.49	4161.73	3776.03	3556.71	727.605
3097.93	2615.61	2996.06	4224.05	4164.82	3782.74	3556.66	718.716
3099.93	2607.64	3021.74	4217.7	4173.6	3792.41	3562.62	717.595
3101.93	2601.37	3056.59	4206.58	4191.63	3809.01	3573.04	715.99
3103.93	2594.73	3091.65	4199.23	4216.77	3832.07	3586.89	717.889
3105.93	2599.76	3119.41	4198.04	4255.67	3863.89	3607.35	722.558
3107.93	2615.16	3127.99	4192.55	4310.2	3902.33	3629.65	730.618
3109.93	2620.7	3114.66	4169.18	4375.68	3944.31	3644.91	746.44
3111.93	2618.01	3084.86	4139.34	4453.54	3976.41	3654.43	770.708
3113.92	2613.28	3059.62	4117.03	4536.19	3993.28	3663.88	797.443
3115.92	2603.68	3052.39	4102.17	4568.44	3996.46	3664.63	809.148
3117.92	2605.78	3054.51	4094.97	4563.72	3992.21	3662.24	805.334
3119.92	2604.72	3043.7	4092.28	4530.33	3987.64	3651.74	797.618
3121.92	2601.08	3024.16	4083.26	4479.58	3974.38	3632.49	786.053
3123.92	2584.89	3010.57	4073.33	4411.28	3964.39	3608.89	773.383
3125.92	2573.84	3000.59	4067.02	4339.37	3951.7	3586.51	758.262
3127.91	2563.76	2983.06	4069.46	4294.91	3934.65	3569.17	752.484
3129.91	2556.02	2962.02	4078.38	4276.25	3910.61	3556.66	753.356
3131.91	2560.32	2935.84	4096.09	4262.35	3887.52	3548.42	754.36
3133.91	2566.33	2903.29	4118.75	4260.99	3861.82	3542.24	760.224
3135.91	2579.61	2873.22	4140.99	4262.52	3831.01	3537.47	764.006
3137.91	2590.59	2859.5	4139.96	4251.74	3807.75	3529.91	758.646
3139.91	2597.81	2847.2	4137.27	4243.21	3788.48	3522.8	754.849
3141.91	2597.4	2842.33	4144.92	4230.5	3775.73	3518.17	753.517
3143.9	2590.05	2842.79	4147.85	4209.26	3771.56	3512.3	750.946
3145.9	2589.37	2838.82	4143.91	4179.73	3781.03	3506.57	745.288
3147.9	2589.79	2829.8	4147.43	4146.34	3802.52	3503.18	742.635
3149.9	2592.66	2822.55	4154.15	4109.21	3823.27	3500.37	739.215
3151.9	2599.43	2818.41	4155.56	4084.67	3836.07	3498.83	734.866
3153.9	2605.56	2819.84	4144.65	4080.13	3846.26	3499.29	730.523
3155.9	2605.79	2823	4129.4	4088.68	3854.12	3500.2	729.044
3157.89	2597.48	2833.08	4120.23	4108.99	3864.87	3504.93	732.784
3159.89	2595.31	2844.27	4112.9	4154.64	3867.27	3514.88	739.326
3161.89	2599.91	2856.43	4096.54	4222.27	3873.23	3529.68	747.792
3163.89	2614.56	2869.74	4078.16	4307.49	3876.33	3549.26	757.798
3165.89	2630.57	2880.88	4068.21	4397.48	3874.42	3570.31	771.851
3167.89	2651.98	2894.23	4073.36	4453.81	3868.45	3588.37	778.028
3169.89	2668.82	2898.67	4082.02	4453.69	3859.23	3592.49	772.499
3171.89	2674.21	2892.25	4087.09	4423.04	3847.35	3584.79	763.655
3173.88	2669.42	2887.25	4094.77	4359.71	3838.17	3569.86	749.687
3175.88	2652.25	2894.47	4110.43	4288.8	3836.19	3556.43	737.782
3177.88	2630.37	2893.99	4134.1	4225.02	3837.66	3544.23	734.078
3179.88	2610.58	2885.11	4163.62	4176.87	3839.77	3535.19	737.726
3181.88	2597.77	2877.28	4185.18	4164.58	3838.16	3532.59	745.316
3183.88	2588.27	2877.44	4213.04	4159.65	3829.58	3533.59	752.56
3185.88	2572.97	2881.12	4235.92	4164.45	3822.64	3535.42	762.118
3187.87	2552.35	2882.1	4255.93	4169.43	3814.02	3534.77	773.299
3189.87	2552.21	2889.76	4265.81	4174.38	3817.88	3540.01	775.402
3191.87	2562.58	2907.11	4268.21	4179.82	3827.21	3548.99	770.982
3193.87	2575.45	2930.51	4278.05	4173.97	3841.02	3559.8	764.381
3195.87	2582.38	2948.65	4290.16	4165.4	3860.03	3569.32	761.368
3197.87	2586.86	2947.4	4296.17	4150.05	3883.02	3572.7	760.906
3199.87	2592.29	2934.35	4292.96	4132.99	3903.18	3571.15	760.033
3201.87	2590.45	2922.64	4286.47	4115.6	3921.87	3567.41	760.491
3203.86	2580.51	2918.01	4270.57	4102.23	3936.1	3561.48	760.248
3205.86	2575.05	2914.04	4244.35	4099.68	3940.77	3554.78	756.941
3207.86	2574.04	2901.88	4215.92	4094.74	3945.19	3546.35	753.138
3209.86	2573.32	2893	4194.12	4095.28	3953.68	3541.88	751.73
3211.86	2563.23	2886.44	4180.95	4105.68	3963.83	3540.02	756.913
3213.86	2546.27	2890.96	4173.59	4120.94	3970.14	3540.38	763.66
3215.86	2528.69	2898.89	4157.5	4140.18	3976.8	3540.41	769.103
3217.85	2514.6	2918.71	4135.36	4153.19	3985.47	3541.47	769.143
3219.85	2512.85	2944.57	4120.47	4169.48	3991.03	3547.68	765.817
3221.85	2514.13	2972.26	4102.42	4184.35	3987.7	3552.17	759.267
3223.85	2519.25	2991.24	4082.51	4188.92	3979.27	3552.24	750.117
3225.85	2523.61	3011.87	4070.72	4188.72	3968.07	3552.6	741.102
3227.85	2518.89	3031.01	4069.12	4194.22	3955.96	3553.84	738.541
3229.85	2513.46	3045.5	4067.38	4193.98	3951.18	3554.3	736.916
3231.85	2505.43	3049.57	4069.11	4196.84	3944.73	3553.14	739.122
3233.84	2503.09	3048.7	4080.38	4204.49	3935.74	3554.48	742.577
3235.84	2508.82	3048.54	4090.03	4209.9	3930.03	3557.46	742.761
3237.84	2518.12	3038.87	4104.1	4211.41	3919.72	3558.44	742.775
3239.84	2533.07	3017.07	4105.54	4215.47	3914.98	3557.22	742.057
3241.84	2540.17	2987.32	4102.57	4228.3	3910.7	3553.81	746.965
3243.84	2537.31	2954.45	4099.95	4255.8	3907.23	3550.95	759.676
3245.84	2524.28	2930.57	4098.38	4289.39	3909.21	3550.37	776.571
3247.83	2515.9	2910.23	4101.77	4310.35	3922.37	3552.12	790.551
3249.83	2509.59	2892.88	4106.65	4325.61	3950.54	3557.05	804.03
3251.83	2498.38	2877.77	4121.75	4329.14	3981.44	3561.7	818.111
3253.83	2482.99	2869.34	4157.69	4317.62	4013.02	3568.13	832.628
3255.83	2462.49	2868.91	4214.32	4306.67	4040.82	3578.64	851.065
3257.83	2457.32	2865.69	4262.97	4298.95	4056.53	3588.29	863.238
3259.83	2461.79	2860.47	4305.33	4288.82	4068.82	3597.05	870.941
3261.83	2460.18	2862.97	4344.03	4290.95	4070.62	3605.75	879.591
3263.82	2457.77	2867.15	4376.66	4314.03	4052.32	3613.59	888.606
3265.82	2473.02	2877.31	4390.09	4320.21	4028.42	3617.81	882.791
3267.82	2493.43	2885.71	4377.12	4307.8	3998.45	3612.5	865.678
3269.82	2516.95	2887.96	4349.18	4278.27	3965.71	3599.62	841.884
3271.82	2546.65	2896.21	4316.96	4253.22	3941.45	3590.9	815.745
3273.82	2580.23	2906.77	4285.62	4224.84	3924.84	3584.46	788.246
3275.82	2603.06	2915.62	4259.74	4198.9	3909.25	3577.31	766.367
3277.81	2622.8	2921.99	4244.39	4172.54	3903.16	3572.98	749.319
3279.81	2645.91	2925	4234.64	4141.01	3896.94	3568.7	732.229
3281.81	2664.41	2922.77	4223.78	4108.98	3892.29	3562.45	717.726
3283.81	2679.78	2923.9	4201.68	4096.09	3888.07	3557.9	704.657
3285.81	2681.69	2930.5	4172.59	4084.74	3885.26	3550.96	693.489
3287.81	2675.33	2936.89	4134.48	4060.73	3879.8	3537.44	680.331
3289.81	2661.36	2939.48	4101.75	4036.95	3878.89	3523.69	672.435
3291.81	2648.5	2939.9	4074.65	4009.42	3881.77	3510.85	665.891
3293.8	2635.93	2941.43	4058.61	3985.52	3886.65	3501.63	662.548
3295.8	2615.73	2944.29	4057.2	3972.29	3901.05	3498.11	668.04
3297.8	2591.39	2937.92	4065.18	3976.71	3909.44	3496.13	681.13
3299.8	2557.34	2918.05	4073.68	3985.98	3911.43	3489.3	700.224
3301.8	2523.12	2892.94	4077.15	4004.47	3909.97	3481.53	720.552
3303.8	2503.67	2874.47	4083.62	4035.71	3900.58	3479.61	736.538
3305.8	2496.1	2861.84	4101.35	4058.94	3886.01	3480.85	747.706
3307.79	2492.59	2867.97	4132.07	4070.02	3869.92	3486.51	754.106
3309.79	2491.65	2888.91	4145.24	4061.28	3851.12	3487.64	749.014
3311.79	2482.59	2912.33	4161.07	4036.14	3850.81	3488.59	746.216
3313.79	2483.34	2945.58	4186.21	4012.02	3860.46	3497.52	742.282
3315.79	2495.59	2989.07	4215.1	3998.78	3874.3	3514.57	736.387
3317.79	2511.15	3044.97	4234.72	3987.93	3891.7	3534.09	726.362
3319.79	2525.12	3103.15	4251.45	3974.57	3906.3	3552.12	715.764
3321.79	2540.19	3172.93	4260.84	3964.28	3923.09	3572.27	702.767
3323.78	2547.47	3228.65	4259.8	3958.14	3933.47	3585.51	692.724
3325.78	2545.26	3281.94	4252.13	3954.28	3938.04	3594.33	685.299
3327.78	2537.06	3335.65	4249.29	3954.41	3935.64	3602.41	681.823
3329.78	2510.39	3340.5	4244.73	3961.19	3923.13	3595.99	690.119
3331.78	2481.26	3310.46	4245.51	3976.02	3908.58	3584.37	704.892
3333.78	2465.32	3246.82	4248.38	3993.2	3888.44	3568.43	718.586
3335.78	2452.43	3166.91	4250.74	4023.09	3866.19	3551.87	735.906
3337.77	2443.25	3105.71	4248.01	4055.8	3851.46	3540.85	750.964
3339.77	2429.74	3072.3	4251.09	4089.85	3843.95	3537.39	766.772
3341.77	2402.51	3071.73	4256.65	4124.7	3853.6	3541.84	785.326
3343.77	2373.64	3071.19	4252.84	4162.33	3872.4	3546.48	804.036
3345.77	2350.48	3074.61	4243.04	4194.36	3897.66	3552.03	818.718
3347.77	2341.52	3086.78	4225.33	4215.63	3928.83	3559.62	824.195
3349.77	2331.36	3095.32	4208.22	4232.12	3964.66	3566.34	830.808
3351.77	2327.35	3101.87	4195.93	4244.46	4000.58	3574.04	835.963
3353.76	2328.94	3102.31	4180.63	4255.57	4014.22	3576.33	836.505
3355.76	2336.31	3087.97	4172.56	4253.95	4005.88	3571.33	832.944
3357.76	2341.25	3054.73	4175.12	4250.3	3997.38	3563.75	834.679
3359.76	2347.1	3017.18	4183.07	4248.12	3987.67	3556.63	838.205
3361.76	2352.75	2993.21	4186.36	4238.06	3990.44	3552.16	839.015
3363.76	2360.31	2971.71	4192.33	4224.32	3990.76	3547.89	838.352
3365.76	2369.69	2953.37	4195.28	4206.75	3989.02	3542.82	835.061
3367.75	2387.97	2938.45	4190.1	4194	3987.49	3539.6	827.593
3369.75	2413.07	2933.29	4164.73	4181.59	3988.94	3536.32	812.63
3371.75	2446.5	2928.61	4138.96	4172.32	4003.28	3537.93	797.297
3373.75	2469.47	2931.54	4119.65	4165.11	4028.02	3542.76	787.583
3375.75	2491.99	2940.73	4103.76	4161.43	4059.57	3551.5	779.543
3377.75	2516.07	2948.77	4097.58	4165.4	4073.87	3560.34	771.839
3379.75	2535.28	2950.74	4098.36	4188.41	4077.77	3570.11	770.317
3381.75	2549.55	2959.49	4105.93	4226.8	4072.49	3582.85	772.059
3383.74	2574.66	2978.16	4117.94	4283.66	4060.27	3602.94	772.245
3385.74	2600.53	2995.45	4126.04	4358.35	4039.1	3623.89	775.594
3387.74	2618.16	3010.61	4131.71	4437.08	4018.57	3643.23	784.325
3389.74	2633.58	3014.23	4134.9	4495.37	3992.75	3654.17	791.276
3391.74	2637.45	3003.96	4145.2	4525.67	3963.24	3655.1	798.849
3393.74	2633.28	2987.76	4155.67	4534.96	3934.75	3649.29	805.021
3395.74	2623.95	2977.09	4168.88	4520.1	3923.46	3642.69	807.218
3397.73	2610.07	2968.53	4183.21	4485.71	3915.57	3632.62	805.855
3399.73	2593.99	2961.6	4192.8	4432.43	3908.06	3617.78	799.576
3401.73	2584.56	2960.21	4197.68	4371.72	3904.47	3603.73	788.329
3403.73	2587.04	2953.63	4199.92	4310.1	3897.17	3589.57	773.92
3405.73	2596.76	2944.88	4214.11	4266.81	3889.17	3582.35	764.772
3407.73	2614.02	2935.2	4244.02	4235.09	3885.22	3582.71	760.274
3409.73	2633.7	2914.48	4285.13	4214.95	3879.02	3585.46	762.896
3411.73	2658.13	2903.62	4333.1	4199.96	3881.54	3595.27	766.26
3413.72	2676.73	2916.15	4387.78	4191.71	3886.75	3611.83	770.116
3415.72	2679.6	2924.77	4450.42	4187.87	3896.62	3627.86	783.576
3417.72	2685.2	2932.94	4491.38	4181.46	3904.42	3639.08	790.496
3419.72	2679.26	2933.01	4506.13	4180.05	3904.19	3640.53	796.002
3421.72	2657.28	2931.59	4476.41	4185.25	3911.49	3632.4	796.537
3423.72	2622.86	2930.96	4422.1	4192.26	3918.56	3617.35	795.147
3425.72	2607.96	2925.91	4366.2	4188.31	3925.37	3602.75	787.009
3427.71	2605.1	2924.86	4317.3	4180.62	3924.33	3590.44	774.921
3429.71	2607.94	2920.64	4287.66	4173.45	3920.93	3582.12	766.294
3431.71	2606.51	2916.61	4270.57	4169.47	3916.44	3575.92	762.438
3433.71	2603.51	2918.06	4263.35	4164.59	3909.04	3571.71	759.66
3435.71	2590.28	2916	4261.67	4162.54	3900.93	3566.28	762.647
3437.71	2574.97	2913.38	4254	4154.91	3892.26	3557.9	763.926
3439.71	2559.39	2906.29	4240.92	4146.96	3881.75	3547.06	764.759
3441.71	2536.79	2894.45	4234.44	4142.02	3869.79	3535.5	770.797
3443.7	2523.38	2878.96	4239.1	4152.26	3857.47	3530.23	780.127
3445.7	2510.25	2875.97	4248.84	4168.76	3848.39	3530.44	789.583
3447.7	2504.63	2868.03	4261.1	4186.84	3839	3531.92	798.594
3449.7	2502.64	2859.61	4268.84	4206.5	3831.05	3533.73	806.069
3451.7	2502.57	2853.56	4268.92	4219.19	3823.97	3533.64	809.4
3453.7	2516.26	2857.93	4266.08	4222.65	3819.06	3536.4	803.784
3455.7	2523.69	2860.93	4271.86	4214.58	3817.45	3537.7	800.259
3457.69	2528.47	2860.54	4278.3	4201.04	3820.59	3537.79	797.75
3459.69	2534.31	2858.87	4271.6	4176.75	3825.67	3533.44	790.162
3461.69	2525.87	2862.55	4255.87	4150.88	3837.94	3526.62	784.364
3463.69	2515.87	2874.58	4238.9	4117.21	3844.8	3518.28	775.21
3465.69	2501.1	2890.29	4227.63	4094.63	3845.73	3511.88	769.968
3467.69	2478.39	2914.18	4222.67	4082.62	3847.23	3509.02	769.534
3469.69	2456.62	2933.15	4216.39	4079	3847.38	3506.51	771.18
3471.69	2441.46	2938.49	4211.33	4071.51	3851.73	3502.9	773.318
3473.68	2428.21	2950.95	4190.32	4066.2	3854.73	3498.08	770.25
3475.68	2419.56	2970.77	4157.95	4061.02	3865.67	3494.99	763.001
3477.68	2410.55	2999.59	4132.97	4056.86	3882.6	3496.51	757.359
3479.68	2405.46	3051.97	4120.98	4058.49	3897.47	3506.87	750.669
3481.68	2399.48	3131.98	4127.26	4065.74	3913.73	3527.64	746.232
3483.68	2404.9	3225.58	4151.42	4089.79	3931.84	3560.71	744.114
3485.68	2420.35	3305.81	4189.91	4134.49	3948.48	3599.81	747.201
3487.67	2439.19	3360.22	4219.33	4188	3960.03	3633.36	751.392
3489.67	2455.84	3368.88	4241.15	4244.75	3964.7	3655.06	759.464
3491.67	2464.88	3339.35	4261.98	4297.77	3972.99	3667.4	774.265
3493.67	2477.43	3285.24	4274.16	4343.58	3980.39	3672.16	788.243
3495.67	2493.54	3229.04	4260	4370.93	3989.32	3668.57	793.701
3497.67	2507.34	3166.48	4237.38	4385.27	4000.91	3659.48	798.089
3499.67	2520.56	3114.08	4215.47	4403.37	4019.28	3654.55	804.12
3501.67	2535.29	3070.46	4202.04	4420.71	4040.89	3653.87	810.848
3503.66	2541.89	3024.08	4203.19	4425.11	4062.26	3651.3	821.044
3505.66	2545.08	2992.21	4222.56	4413.67	4083.63	3651.43	829.545
3507.66	2548.08	2965.33	4245.67	4396.74	4093.53	3649.87	835.488
3509.66	2546.38	2950.27	4276.68	4376.48	4095.8	3649.12	840.66
3511.66	2543.64	2952.85	4315.96	4364.21	4096.05	3654.54	845.945
3513.66	2534.31	2941.84	4372.65	4375.9	4090.03	3662.94	864.319
3515.66	2526.75	2928.16	4444.62	4407.82	4079.75	3677.42	890.138
3517.65	2513.31	2930.85	4510.13	4454.28	4062.68	3694.25	916.032
3519.65	2505.75	2944.4	4579.59	4514.3	4039.55	3716.72	941.783
3521.65	2501.81	2955.78	4621.11	4576.89	4010.11	3733.14	961.456
3523.65	2506.88	2974.45	4633.19	4620.43	3975.98	3742.19	966.341
3525.65	2525.45	2994.36	4601.32	4624.18	3944.06	3737.87	948.205
3527.65	2531.03	3010.88	4522.52	4591.19	3915.52	3714.23	916.182
3529.65	2537.16	3022.46	4428.87	4514.11	3909.02	3682.32	872.843
3531.65	2548.32	3019.83	4325.47	4418.45	3919.87	3646.39	826.19
3533.64	2570.63	3018.56	4253.72	4319.98	3943.55	3621.29	784.086
3535.64	2604.92	3020.06	4228.91	4232.84	3978.19	3612.98	752.447
3537.64	2642.28	3007.3	4202.73	4177.85	4030.76	3612.18	733.236
3539.64	2664.24	2989.11	4177.96	4147.23	4087.81	3613.27	727.911
3541.64	2672.43	2974.35	4157.94	4117.85	4135.35	3611.58	727.532
3543.64	2655.19	2968.09	4147.77	4099.01	4153.75	3604.76	732.73
3545.64	2603.05	2963.02	4137.73	4085.59	4140.57	3585.99	744.285
3547.63	2555.24	2964.83	4128.39	4068.57	4116.82	3566.77	750.884
3549.63	2536.69	2963.47	4126.7	4045.48	4083.45	3551.15	747.239
3551.63	2540.36	2971.4	4111.97	4027.62	4043.15	3538.9	731.55
3553.63	2545.66	3003.23	4095.19	4015.35	4004.08	3532.7	711.712
3555.63	2544.55	3043.06	4088.66	4005.25	3978.45	3532	697.724
3557.63	2535.46	3066.07	4090.09	3992.6	3951.26	3527.1	690.916
3559.63	2530.19	3083.26	4098.91	3982.7	3929.7	3524.95	686.917
3561.63	2520.41	3086.58	4123.01	3972.74	3908.43	3522.23	690.376
3563.62	2510.97	3084.25	4150.91	3971.48	3888.02	3521.13	697.373
3565.62	2504.36	3074.64	4181.69	3974.78	3874.24	3521.94	707.107
3567.62	2495.9	3062.42	4203.16	3980.65	3863.47	3521.12	716.771
3569.62	2481	3057.89	4221.32	3987.2	3855.25	3520.53	727.25
3571.62	2459.92	3050.29	4228.41	3994.73	3858.88	3518.44	739.331
3573.62	2447.27	3026.86	4224.22	3997.52	3862.2	3511.61	747.436
3575.62	2445.08	3000.95	4214.7	4001.76	3857.79	3504.05	750.399
3577.61	2445.63	2987.8	4204.2	4009.27	3851.59	3499.7	750.483
3579.61	2452.64	2979.44	4206.62	4014.73	3845.64	3499.81	750.276
3581.61	2466.47	2977.24	4228.74	4026.66	3840.92	3508.01	752.629
3583.61	2498.94	2982.07	4267.41	4035.96	3837.26	3524.33	751.223
3585.61	2526.23	2988.14	4311.58	4042.49	3847.22	3543.13	754.062
3587.61	2535.99	2982.9	4358.72	4046.6	3858.42	3556.53	765.731
3589.61	2530.69	2968.2	4387.23	4043.12	3866.95	3559.24	778.079
3591.61	2514.61	2947.18	4383.07	4036.33	3876.59	3551.55	786.226
3593.6	2499.64	2929.72	4346.87	4022.6	3889.93	3537.75	784.405
3595.6	2484.86	2916.85	4296.75	4009.31	3908.72	3523.3	779.279
3597.6	2478.58	2909.17	4245.85	4001.16	3936.69	3514.29	772.902
3599.6	2471.03	2913.85	4210.25	3997.17	3965.29	3511.52	769.708
3601.6	2470.35	2926.22	4186.69	4004.03	3984.12	3514.28	766.215
3603.6	2472.55	2933.04	4189.15	4014.77	4002.16	3522.33	769.202
3605.6	2476.08	2942.29	4191.48	4032.04	4009.7	3530.32	770.693
3607.59	2481.81	2947.14	4190.34	4053.43	4005.93	3535.73	770.521
3609.59	2488.3	2944.27	4182.22	4073.81	3997.61	3537.24	769.372
3611.59	2488.48	2931.51	4176.2	4090.73	3982.76	3533.94	771.338
3613.59	2481.84	2908.24	4164.18	4104.42	3964.92	3524.72	775.625
3615.59	2478.89	2881.62	4148.42	4116.02	3941.41	3513.27	777.649
3617.59	2476.36	2863.97	4140.74	4121.94	3913.34	3503.27	777.902
3619.59	2473.19	2861.02	4136.18	4117.2	3881.66	3493.85	773.592
3621.59	2462.68	2870.69	4135.17	4113.07	3857.09	3487.74	771.057
3623.58	2450.12	2882.24	4138.27	4103.99	3835.5	3482.02	769.258
3625.58	2433.51	2893.46	4138.82	4099.34	3820.59	3477.14	770.187
3627.58	2405.18	2901.21	4139.01	4110.42	3814.69	3474.1	780.033
3629.58	2383.58	2903.87	4133.35	4130.85	3819.72	3474.27	790.536
3631.58	2378.84	2899.36	4124.03	4146.64	3825.69	3474.91	795.025
3633.58	2389.8	2887.73	4127.27	4158.31	3827.46	3478.11	796.725
3635.58	2413.41	2878.82	4150.99	4155.87	3840.91	3488	796.242
3637.57	2444.76	2868.4	4189.77	4141.26	3856.81	3500.2	794.789
3639.57	2476.22	2860.15	4239.39	4126.53	3876.35	3515.73	796.427
3641.57	2509.3	2849.6	4294.98	4107.13	3890.98	3530.4	798.961
3643.57	2541.45	2851.65	4356.7	4087.49	3900.32	3547.52	801.127
3645.57	2568.9	2865.69	4415.08	4069.05	3907.18	3565.18	802.347
3647.57	2575.91	2882.16	4453.35	4061.48	3901.57	3574.89	805.141
3649.57	2570.77	2889.43	4484.59	4064.61	3888.18	3579.51	812.948
3651.57	2571.12	2894.85	4510.86	4078.69	3870.69	3585.24	819.578
3653.56	2578.6	2905.95	4500.51	4089.64	3847.12	3584.36	811.706
3655.56	2587.68	2914.52	4466.77	4096.55	3830.3	3579.16	797.399
3657.56	2585.13	2922.23	4418.39	4091.15	3824.67	3568.31	781.95
3659.56	2579.58	2930.65	4367.45	4088.12	3822.8	3557.72	767.663
3661.56	2568.31	2927.62	4329.6	4091.38	3827.61	3548.9	763.052
3663.56	2549.02	2916.92	4317.99	4096.6	3842.61	3544.63	770.845
3665.56	2531.44	2899.6	4320.14	4098.28	3864.05	3542.7	783.035
3667.55	2510.05	2873.33	4317.21	4101.23	3892.37	3538.84	798.192
3669.55	2490.55	2849.57	4303.11	4106.31	3920.14	3533.94	810.156
3671.55	2469.05	2837.13	4285.18	4114.01	3944.47	3529.97	819.884
3673.55	2454.29	2824.17	4273.24	4125.35	3966.23	3528.66	829.532
3675.55	2449.3	2825.56	4262.21	4143.7	3975.48	3531.25	832.971
3677.55	2455.14	2825.05	4249.16	4165.42	3969.8	3532.92	831.656
3679.55	2460.47	2818.37	4244.7	4189.68	3954.79	3533.6	833.168
3681.55	2467.7	2813.99	4250.62	4219.35	3940.07	3538.35	837.173
3683.54	2479.4	2808.85	4260.76	4267.42	3923.59	3548.01	844.824
3685.54	2493.37	2798.29	4262.22	4337.56	3909.94	3560.27	857.04
3687.54	2499.51	2788.52	4255.46	4424.5	3911.29	3575.85	876.497
3689.54	2499.58	2788.92	4244.48	4521.68	3914.94	3593.92	898.975
3691.54	2502.4	2802.27	4228.68	4621.46	3916.95	3614.35	919.123
3693.54	2507.33	2829.34	4217.18	4731.94	3914.01	3639.96	940.832
3695.54	2512.03	2859.55	4210.72	4848.72	3913.23	3668.85	966.777
3697.53	2512.8	2900.95	4210.84	4912.27	3914.21	3690.22	977.737
3699.53	2510.82	2940.9	4225.38	4918.14	3908	3700.65	973.851
3701.53	2501.5	2968.88	4245.75	4872.29	3895.07	3696.7	959.301
3703.53	2496.15	2981.89	4264.97	4778.1	3882.85	3680.79	932.474
3705.53	2498.31	2976.97	4279.62	4662.83	3874.17	3658.38	901.596
3707.53	2513.84	2948.24	4285.8	4540.41	3868.33	3631.32	869.818
3709.53	2531.88	2908.69	4276.59	4418.42	3866.92	3600.5	839.29
3711.53	2554.82	2871.07	4261.96	4336.46	3866.45	3578.15	817.452
3713.52	2578.84	2831.35	4254.48	4303.03	3870.68	3567.68	809.974
3715.52	2599.55	2800.99	4252.19	4271.5	3877.46	3560.34	803.851
3717.52	2610.27	2786.12	4253.86	4240.35	3886.06	3555.33	798.654
3719.52	2618.22	2783.93	4257.16	4210.92	3896.48	3553.34	792.458
3721.52	2622.22	2795.02	4269.61	4180.98	3903.68	3554.3	786.091
3723.52	2619.56	2811.71	4281.61	4153.05	3909.83	3555.15	780.875
3725.52	2614.19	2839.39	4289.95	4126.73	3908.24	3555.7	772.822
3727.51	2613.28	2866.42	4297.19	4099.45	3903.3	3555.93	763.145
3729.51	2615.37	2898.17	4315.82	4079.14	3898.12	3561.32	755.881
3731.51	2617.36	2919.72	4345.8	4064.01	3889.97	3567.37	754.759
3733.51	2608.57	2929.53	4377.26	4049.54	3888.36	3570.65	761.172
3735.51	2590.41	2926.51	4401.45	4032.85	3883.09	3566.86	770.906
3737.51	2566.27	2921.39	4409.91	4020.1	3877.9	3559.12	779.492
3739.51	2541.87	2907.52	4398.55	4012.88	3876	3547.36	785.756
3741.51	2512.23	2891.92	4369.9	4013.25	3874.79	3532.42	790.698
3743.5	2483.63	2879.3	4337.5	4020.03	3873.34	3518.76	794.945
3745.5	2459.17	2878.37	4312.87	4031.72	3870.94	3510.61	798.477
3747.5	2447.97	2886	4307.29	4042.82	3869.55	3510.73	800.958
3749.5	2448.26	2895.97	4301.11	4049.03	3867.02	3512.28	798.149
3751.5	2445.13	2911.98	4296.77	4051.96	3863.02	3513.77	795.119
3753.5	2447.16	2929.26	4291.46	4060.9	3859.17	3517.59	790.996
3755.5	2445.66	2958.06	4274.84	4069.86	3854.94	3520.67	783.312
3757.5	2447.38	2980.67	4250.18	4078.39	3855.12	3522.35	774.375
3759.49	2437.55	2991.58	4227.16	4091.67	3860.37	3521.67	773.568
3761.49	2428.05	2989.44	4205.88	4108.08	3872.72	3520.83	776.936
3763.49	2419.14	2981.97	4181.2	4121.37	3893.3	3519.39	780.954
3765.49	2415.01	2976.7	4159.63	4130.57	3917.87	3519.96	783.642
3767.49	2416.27	2975.99	4133.3	4137.33	3941.58	3520.89	782.484
3769.49	2424.74	2968.33	4113.79	4145.86	3952.19	3520.98	780.228
3771.49	2431.62	2959.46	4104.12	4150.9	3955.03	3520.23	778.981
3773.48	2430.88	2953.9	4095.65	4154.04	3961.24	3519.14	780.18
3775.48	2426.62	2943.19	4092.55	4153.93	3961.9	3515.64	783.11
3777.48	2417.61	2942.96	4096.42	4149.22	3959.37	3513.12	785.689
3779.48	2411.17	2940.74	4111.86	4140.55	3952.02	3511.27	788.461
3781.48	2409.72	2936.18	4126.4	4127.17	3944.14	3508.72	788.861
3783.48	2410.72	2936.96	4126.59	4112.42	3938.41	3505.02	784.743
3785.48	2408.56	2944.25	4124.39	4098.88	3933.68	3501.95	780.495
3787.48	2404.44	2961.82	4121.84	4091.75	3935.05	3502.98	777.168
3789.47	2393.14	2973.83	4107.51	4080.54	3933.3	3497.67	773.921
3791.47	2389.77	2981.25	4086.48	4069.19	3933.68	3492.07	767.692
3793.47	2393.78	2979.59	4067.49	4060.13	3933.92	3486.98	761.214
3795.47	2404.33	2970.72	4049.65	4053.37	3933.51	3482.32	754.209
3797.47	2418.42	2958.29	4044.63	4054.85	3926.95	3480.63	749.693
3799.47	2435.35	2952.73	4053.7	4062.03	3916.42	3484.05	746.251
3801.47	2458.81	2957.34	4071.11	4068.94	3911.38	3493.52	741.187
3803.46	2473.56	2971.12	4096.1	4080.42	3915.71	3507.38	741.293
3805.46	2479.76	2983.61	4124.94	4091.55	3922.53	3520.48	745.732
3807.46	2480.14	2992.38	4146.01	4090.83	3930.44	3527.96	749.263
3809.46	2479.83	2997.54	4146.25	4089.85	3935.92	3529.88	749.058
3811.46	2480.11	2997.41	4151.98	4094.03	3931.8	3531.06	750.393
3813.46	2471.25	2984.04	4150.55	4095.15	3929.42	3526.08	755.473
3815.46	2464.27	2965.05	4147.18	4100.27	3923.39	3520.03	760.812
3817.46	2461.66	2941.75	4143.56	4110.65	3915.4	3514.61	766.216
3819.45	2467.19	2925.69	4157.24	4125.94	3904.19	3516.05	771.746
3821.45	2481.1	2914.08	4170.08	4139.7	3892.11	3519.41	773.232
3823.45	2498.44	2906.52	4182.38	4151.71	3880.61	3523.93	772.609
3825.45	2516.65	2913.41	4188.97	4153.15	3869.17	3528.27	765.613
3827.45	2530.26	2931.42	4186.31	4155.96	3861.61	3533.11	756.682
3829.45	2535.27	2960.37	4177.89	4154.53	3859.42	3537.49	746.994
3831.45	2531.98	2993.04	4166.38	4158.18	3858.06	3541.53	740.087
3833.44	2525.73	3021.49	4151.99	4164.2	3857.03	3544.09	735.218
3835.44	2517.98	3041.08	4145.13	4170.74	3857.72	3546.53	734.54
3837.44	2502.38	3034.95	4148.12	4180.67	3859.49	3545.12	743.965
3839.44	2473.62	3017.09	4153.78	4203.14	3855.99	3540.72	762.711
3841.44	2453.12	3007.68	4155.16	4236.87	3848.47	3540.26	778.439
3843.44	2454.95	2994.57	4146.18	4262.59	3833.5	3538.36	782.712
3845.44	2473.27	2973.93	4137.81	4280.5	3816.65	3536.43	781.112
3847.44	2486.82	2949.51	4132.64	4291.37	3802.16	3532.5	781.36
3849.43	2496.24	2919.97	4128.05	4300.65	3795.13	3528.01	784.639
3851.43	2494.26	2895.82	4123.77	4287.39	3788.78	3518	785.397
3853.43	2475.73	2884.33	4129.98	4271.27	3788.08	3509.88	790.953
3855.43	2449.35	2876.63	4145.82	4254.56	3790.26	3503.32	800.485
3857.43	2423.12	2875.69	4162.25	4242.02	3795.24	3499.66	810.214
3859.43	2410.57	2880.92	4182.05	4250.95	3805.23	3505.94	820.403
3861.43	2403.87	2889.96	4200.33	4254.26	3817.2	3513.13	826.554
3863.42	2411.96	2900.8	4206.11	4261.17	3823.72	3520.75	825.146
3865.42	2416.54	2918.9	4209.99	4261.02	3823.06	3525.9	820.946
3867.42	2424.63	2948.38	4218.83	4258.39	3817.71	3533.59	813.616
3869.42	2427.06	2976.12	4231.68	4252.71	3811.89	3539.89	808.841
3871.42	2421.81	2992.01	4238.07	4247.35	3801.88	3540.22	807.289
3873.42	2419.35	2994.47	4233.71	4238.6	3791.97	3535.62	804.073
3875.42	2420.58	2989.09	4219.24	4236.21	3784.34	3529.89	800.291
3877.42	2432.8	2971.27	4198.73	4236.61	3776.26	3523.14	794.186
3879.41	2434.46	2949.47	4175.48	4233.69	3771.03	3512.83	791.462
3881.41	2432.7	2938.54	4157.31	4232.93	3770.32	3506.36	790.014
3883.41	2429.21	2936.66	4136.33	4229.23	3775.19	3501.32	786.82
3885.41	2430.45	2934.73	4122.55	4223.29	3792.5	3500.7	784.179
3887.41	2420.5	2922.68	4112.66	4213.39	3820.27	3497.9	788.265
3889.41	2404.7	2895.74	4104.92	4194.93	3855.24	3491.11	796.784
3891.41	2388.08	2865.12	4093.28	4172.39	3891.06	3481.99	805.424
3893.4	2379.26	2843.4	4081.39	4141.79	3919.74	3473.11	807.72
3895.4	2378.13	2828.49	4072.63	4108.74	3942.16	3466.03	805.872
3897.4	2378.31	2821.63	4075.98	4089.15	3960.44	3465.1	806.713
3899.4	2387.5	2815.54	4081.54	4077.94	3969.51	3466.41	805.164
3901.4	2398.65	2806.58	4089.12	4073.19	3966.36	3466.78	803.335
3903.4	2419.99	2809.7	4096.63	4073.14	3950.7	3470.03	794.675
3905.4	2450.45	2816.93	4104.57	4074.43	3931.82	3475.64	782.164
3907.4	2486.28	2823.06	4106.88	4080.35	3915.32	3482.38	768.427
3909.39	2523.32	2821.55	4108.64	4091.09	3908.48	3490.61	758.359
3911.39	2552.23	2819.14	4106.98	4098.37	3910.98	3497.54	751.195
3913.39	2565.7	2825.54	4092.86	4093.82	3921.09	3499.8	743.177
3915.39	2568.1	2839.88	4082.96	4085.87	3931.06	3501.57	737.067
3917.39	2551.03	2858.45	4088.77	4075.69	3935	3501.79	738.143
3919.39	2521.58	2880.65	4094.85	4065.72	3929.95	3498.55	741.557
3921.39	2495.02	2902.67	4106.6	4059.89	3915.03	3495.84	745.048
3923.38	2476.86	2917.55	4121.5	4054.48	3893.94	3492.87	747.448
3925.38	2465.96	2924.31	4138.04	4047.72	3866.69	3488.54	748.593
3927.38	2455.27	2918.75	4157.53	4041.64	3836.66	3481.97	752.784
3929.38	2447.53	2905.42	4174.4	4036.46	3800.42	3472.85	756.701
3931.38	2439.92	2897.7	4186.39	4040.39	3775.98	3468.08	761.7
3933.38	2433.22	2892.74	4194.12	4056.25	3761.06	3467.48	768.258
3935.38	2429.31	2889.46	4197.38	4088.77	3747.25	3470.43	776.03
3937.38	2425.15	2892.07	4196.06	4140.91	3741.19	3479.08	786.785
3939.37	2430.36	2891.65	4194.25	4222.89	3739.72	3495.77	802.517
3941.37	2435.81	2893.66	4190.86	4336.52	3739.91	3519.35	826.573
3943.37	2445.72	2886.9	4193.6	4480.73	3742.05	3549.8	862.624
3945.37	2479.92	2870.47	4202.91	4645.93	3747.92	3589.43	903.547
3947.37	2516.58	2856.43	4212.1	4831.71	3754.15	3634.19	953.465
3949.37	2550.35	2845.37	4213.12	5023.4	3763.76	3679.2	1008.54
3951.37	2584.96	2831.21	4216.69	5117.76	3778.62	3705.85	1034.55
3953.36	2607.16	2820.32	4221.01	5142.09	3793.1	3716.74	1040.01
3955.36	2611.22	2818.62	4229.02	5116.09	3809.23	3716.84	1031.74
3957.36	2597	2821.7	4236.11	5041	3818.54	3702.87	1010.9
3959.36	2567.36	2820.55	4245.02	4920.62	3817.74	3674.26	981.555
3961.36	2526.05	2814.01	4253.06	4753.53	3817.79	3632.89	944.763
3963.36	2497.11	2803.15	4259.59	4568.49	3821.19	3589.91	904.541
3965.36	2488.32	2788.96	4267.46	4413.69	3832.94	3558.28	872.75
3967.36	2495.06	2773.76	4275.59	4320.98	3836.7	3540.42	854.118
3969.35	2511.57	2753.74	4285.91	4244.85	3841.14	3527.44	839.489
3971.35	2522.81	2740.97	4300.31	4170.29	3850.76	3517.03	828.009
3973.35	2548.7	2742.13	4311.62	4102.62	3857.96	3512.61	810.642
3975.35	2573.85	2738.1	4320.86	4044.82	3878.5	3511.23	798.675
3977.35	2578.44	2726.14	4327.86	4008.26	3892.55	3506.65	797.762
3979.35	2567.39	2723.26	4334.88	3982.73	3906.91	3503.04	801.355
3981.35	2542.56	2736.97	4331.52	3974.43	3914.9	3500.07	804.292
3983.34	2501.63	2770.05	4322.08	3972.57	3911.94	3495.65	805.962
3985.34	2461.05	2811.59	4305.29	3985	3906.26	3493.84	806.523
3987.34	2428	2846.13	4292.45	4008.13	3898.73	3494.69	809.591
3989.34	2404.65	2875.16	4285.66	4031.22	3890.03	3497.34	812.674
[truncated: 1,004 more rows]
