# Supplementary material for: Ionogel thin films as a compatibilizing pretreatment for electrospray deposition
Source: Royal Society of Chemistry journal article supplement (doi:10.1039/d5lp00359h), 2026-01-01
Supplement: d5lp00359h1.zip [file A data.xlsx]

## Sheet: Sheet1
Lateral	Height Data	Height Data	Height Data	Height Data	Height Data
µm	nm	nm	nm	nm	nm
	E1	E2	E3	E4	E5
0	13.9733	10.3262	4.7812	0.883573	61.6866
1.99867	14.221	10.8007	5.51573	0.434847	81.93
3.99734	13.5892	10.6699	5.16808	0.666939	91.258
5.996	13.2781	10.0686	4.73519	0	96.0686
7.99467	12.0871	9.34618	3.70461	-0.160952	95.2627
9.99334	11.0916	8.30505	4.25475	-1.39822	96.0165
11.992	10.253	7.31241	5.401	-1.84061	90.1794
13.9907	9.47918	6.42648	4.34409	-2.45054	84.1421
15.9893	8.65888	5.58241	5.46183	-3.3463	78.4481
17.988	7.66016	4.80396	6.41428	-3.89102	73.7486
19.9867	6.97762	3.82005	7.79695	-4.68852	73.4416
21.9853	6.17146	2.94284	9.48889	-5.06104	72.1759
23.984	5.5022	2.24053	11.2288	-4.93637	64.0262
25.9827	4.64071	1.73883	12.2745	-5.18606	52.3868
27.9813	4.21155	1.45187	6.81547	-4.94348	37.3135
29.98	3.61633	0.89304	2.25025	-5.01673	24.4502
31.9787	3.21393	0.544579	1.06208	-5.37442	15.1909
33.9773	2.65029	0.168117	0.619214	-5.55022	7.83277
35.976	2.27864	0	0	-5.74707	0
37.9747	1.86391	-0.452878	-0.867349	-5.5725	-6.0124
39.9734	1.77798	-0.433321	-0.855657	-5.01155	-8.74398
41.972	1.01533	-0.821991	-1.94028	-4.95261	-10.3382
43.9707	0.941473	-0.989646	-2.02526	-4.66915	-11.0089
45.9694	0.566605	-0.942266	-2.23026	-4.55923	-9.05766
47.968	0.3823	-0.814942	-2.43182	-4.61736	-5.22453
49.9667	0	-1.14273	-2.30354	-3.96367	-3.20373
51.9654	-0.207149	-1.43172	-2.95506	-4.09317	-2.88673
53.964	-0.729461	-1.80913	-3.06577	-3.67384	-4.50902
55.9627	-0.54582	-1.87368	-2.85939	-2.89102	-3.73313
57.9614	0.548414	-1.99135	-3.2167	-1.74914	-4.56577
59.96	2.74683	-2.17391	-3.1432	0	-8.70452
61.9587	5.53383	-2.28933	-3.52021	2.33257	-8.93896
63.9574	9.99963	-2.58422	-3.56661	5.5124	-11.678
65.956	16.09	-2.65578	-3.27547	9.96659	-15.3263
67.9547	23.6615	-2.60504	-3.38217	15.1232	-18.471
69.9534	32.4706	-2.45948	-2.91545	20.9309	-23.6438
71.952	41.2623	-2.45776	-3.24018	26.6608	-29.1972
73.9507	48.8347	-2.36476	-3.09334	30.487	-31.5246
75.9494	47.8053	-2.42727	-2.69744	26.2953	-33.7463
77.948	34.1517	-2.51775	-2.42313	26.3212	-35.5452
79.9467	20.2463	-2.38405	-2.15792	27.4279	-39.6935
81.9454	20.5947	-2.14689	-1.64957	28.2194	-37.8997
83.944	21.2489	-1.80373	-1.10062	28.6806	-34.346
85.9427	23.2019	-1.78325	0	29.1295	-30.2057
87.9414	24.2195	-2.08291	1.30208	28.8848	-26.6214
89.94	23.8102	-1.9696	3.73854	29.1913	-26.9237
91.9387	30.3467	-2.04725	6.91414	28.9803	-26.1885
93.9374	41.9522	-2.07341	10.8836	29.0791	-25.9224
95.936	57.0144	-2.16425	16.0279	29.7026	-20.4515
97.9347	75.298	-2.31507	22.7461	29.654	-11.6231
99.9334	94.5779	-2.26346	30.8108	31.5702	-3.37222
101.932	105.304	-2.11833	40.1052	31.9916	0
103.931	104.073	-2.20396	45.0996	34.9828	-5.91697
105.929	108.41	-1.97652	49.8033	36.0089	-11.4594
107.928	100.593	-2.09733	54.8091	39.7617	-18.1738
109.927	86.8445	-1.84306	60.982	40.1863	-23.711
111.925	86.2107	-1.53873	67.3908	42.8839	-25.8867
113.924	71.7531	-1.07599	73.4164	36.0568	-21.3123
115.923	45.2172	-0.620879	78.9385	35.1676	-14.0795
117.921	31.0454	-0.196177	77.476	33.9266	-5.50827
119.92	24.9893	0.143285	81.5957	35.1321	2.56609
121.919	20.1898	0.236715	87.7262	36.7345	11.2112
123.917	15.3728	-0.843467	92.7348	40.0426	13.9644
125.916	12.0207	-0.549014	98.2707	46.6845	2.45805
127.915	9.64167	-0.951225	102.669	53.8098	-9.51857
129.913	8.10292	-0.783428	97.8136	66.0316	-24.923
131.912	8.14802	-0.881424	93.1492	80.4132	-31.9784
133.911	9.45175	-0.866631	94.0904	97.529	-36.4421
135.909	11.9593	-0.456094	93.336	116.524	-38.9349
137.908	15.6673	-0.270951	93.1508	134.158	-40.5432
139.907	19.9212	-0.0888349	93.3855	140.064	-42.3092
141.905	24.1647	0	93.5999	119.631	-43.9301
143.904	25.5989	0.368092	94.9804	108.762	-45.4314
145.903	23.8108	0.928723	96.9762	98.5164	-44.681
147.901	20.2979	1.51859	99.8089	93.6694	-43.0773
149.9	19.6996	2.39791	102.984	90.9431	-39.8283
151.899	20.7609	3.2335	106.595	88.5229	-35.2794
153.897	22.6195	4.2695	110.769	86.4161	-27.9387
155.896	26.4043	5.58185	115.32	84.5438	-17.9055
157.895	30.9963	7.36372	119.331	84.1698	-6.39704
159.893	37.3165	10.2173	120.023	83.3998	3.92034
161.892	43.9697	13.3542	120.965	84.3434	14.6772
163.891	50.9298	17.1493	122.103	82.8891	27.5215
165.889	57.0887	20.7386	122.77	83.7687	45.2115
167.888	59.6411	24.4314	123.615	86.1054	66.7496
169.887	43.8341	22.8984	125.064	88.3263	85.4363
171.885	30.7953	21.2572	126.766	91.2248	96.1592
173.884	29.7363	21.5974	128.819	94.3779	109.866
175.883	27.7089	21.3005	130.56	92.1335	121.44
177.881	26.1321	21.5889	132.579	91.9255	130.424
179.88	24.6782	21.815	133.598	94.461	139.097
181.879	23.012	22.2553	134.403	94.871	149.004
183.877	22.3328	22.4313	133.894	97.1998	159.161
185.876	21.5047	22.5336	131.404	101.416	163.238
187.875	20.9683	23.2001	121.953	105.72	163.177
189.873	20.8033	23.862	117.041	110.931	166.208
191.872	20.1108	24.6197	117.429	115.144	175.894
193.871	19.7114	25.3343	117.075	111.441	195.327
195.869	19.3818	26.3601	118.154	103.453	219.27
197.868	19.3464	27.1627	119.483	96.4642	252.743
199.867	19.3633	27.4447	120.573	92.2276	292.252
201.865	19.9701	27.9132	119.186	91.3939	331.001
203.864	20.3658	28.7101	120.267	91.3826	368.723
205.863	20.7858	28.7945	119.645	91.1114	396.044
207.861	21.4978	29.1963	119.378	90.713	417.813
209.86	22.6105	29.3636	118.883	85.9489	442.361
211.859	23.7136	29.878	118.798	79.8474	476.545
213.857	24.8366	30.6003	118.798	77.9329	520.267
215.856	25.1421	31.5011	118.79	77.0525	578.955
217.855	25.9506	32.5747	119.423	76.3195	648.599
219.853	24.8325	33.6745	119.593	76.16	716.839
221.852	25.1773	35.2293	120.051	76.3675	774.604
223.851	25.1885	36.6105	120.41	77.397	844.789
225.849	25.2463	37.8981	120.904	78.4116	915.14
227.848	25.2509	38.0649	121.437	80.8134	974.938
229.847	25.4855	34.3609	121.869	81.6557	1031.62
231.845	25.5636	33.5311	122.585	83.8023	1081.69
233.844	25.8745	33.7039	123.313	86.5645	1136.34
235.843	26.0084	33.4432	124	90.3562	1193.24
237.841	25.9827	33.3952	124.834	94.8612	1252.49
239.84	25.9057	33.3492	125.361	99.7202	1312.03
241.839	26.0486	33.8879	125.537	103.961	1372.41
243.837	26.2625	35.0753	126.25	105.552	1420.63
245.836	27.4708	37.1523	127.714	103.912	1451.31
247.835	29.2526	40.294	129.505	95.6236	1472.47
249.833	31.1897	44.5783	132.083	93.9242	1495.54
251.832	34.2724	50.7068	135.559	90.7258	1513.83
253.831	38.2059	58.6646	139.995	90.7843	1532.01
255.829	43.4777	67.9643	145.553	89.4516	1549.13
257.828	48.82	77.8414	150.27	88.5294	1558.62
259.827	54.0867	87.0723	153.839	88.6529	1559.67
261.825	58.7687	84.9991	158.76	89.0148	1565.87
263.824	60.136	79.3676	163.855	88.9206	1569.95
265.823	45.7396	75.7338	169.8	88.8235	1572.4
267.821	34.614	74.1327	173.453	87.9668	1574.09
269.82	34.7369	73.2008	172.471	87.3354	1574.06
271.819	35.4795	72.5489	163.54	86.577	1570.96
273.817	37.2454	71.6753	156.638	86.4324	1567.33
275.816	40.3564	71.0556	154.508	86.2717	1566.34
277.815	44.7155	70.3747	153.331	86.1944	1568.37
279.813	50.6068	69.6337	153.618	85.0873	1572.17
281.812	51.3898	69.2356	154.158	84.7101	1585.28
283.811	60.7192	68.5518	155.788	84.3138	1600.2
285.809	74.1298	68.088	157.863	83.1125	1612.04
287.808	90.4067	67.7194	160.979	82.9643	1624.4
289.807	107.781	67.3007	164.54	83.854	1636.73
291.805	123.959	66.961	168.024	84.5261	1652.5
293.804	126.647	67.154	173.919	85.7504	1672.64
295.803	116.577	67.5159	180.334	85.3883	1689.44
297.801	95.6006	68.0069	185.11	85.6153	1719.66
299.8	70.5196	69.1219	183.855	92.289	1754.54
301.799	64.5884	70.557	189.84	100.598	1785.22
303.797	64.8829	72.7334	197.006	110.585	1798.99
305.796	66.1479	75.2588	204.699	120.894	1805.36
307.795	68.5944	78.1796	211.14	128.139	1795.64
309.793	71.6004	82.0629	213.337	122.322	1785.52
311.792	74.032	84.3115	215.202	119.308	1773.83
313.791	64.3536	85.6803	219.37	119.035	1762.12
315.789	45.5799	88.5776	223.344	118.07	1762.73
317.788	35.7948	92.6768	226.516	117.485	1756.29
319.787	36.0752	97.6003	230.927	107.29	1746.94
321.785	37.7268	103.839	235.443	102.164	1743.78
323.784	40.3221	111.2	239.384	99.3959	1751.56
325.783	43.6003	119.361	245.306	98.9871	1759.5
327.781	46.4151	127.644	252.21	96.5189	1764.51
329.78	38.3918	130.053	260.248	92.7426	1768.9
331.779	35.5525	131.664	268.684	93.4669	1764.67
333.777	40.7812	132.511	278.64	97.8555	1768.8
335.776	47.6204	131.737	290.049	104.466	1771.76
337.775	55.6473	132.542	301.373	110.741	1774.89
339.773	62.9704	133.114	314.488	119.096	1781.03
341.772	67.3949	132.887	332.684	128.299	1791.06
343.771	50.0862	131.701	357.994	137.74	1812.26
345.769	32.3953	130.945	392.018	141.538	1839.84
347.768	20.7221	129.901	428.761	142.779	1877.69
349.767	16.4885	128.226	471.535	145.624	1923.1
351.765	13.0511	125.713	526.799	147.273	1969.65
353.764	10.1474	122.318	595.604	145.984	2007.97
355.763	7.00065	117.032	675.149	146.415	2035.7
357.761	4.67839	110.751	756.687	142.216	2043.22
359.76	2.43284	102.178	832.903	140.37	2044.91
361.759	0.734177	89.5784	916.588	139.724	2043.71
363.757	-0.575113	84.518	1007.27	132.545	2038.6
365.756	-1.16533	82.4442	1085.01	130.522	2047.89
367.755	-0.635544	80.669	1163.11	128.084	2049.48
369.753	0.305284	80.5365	1247.49	126.428	2047.65
371.752	2.05827	81.4512	1313.56	123.896	2054.39
373.751	4.80631	84.2918	1374.29	121.454	2068.6
375.75	8.62858	89.1424	1439.22	120.735	2099.94
377.748	13.021	95.5311	1508.27	120	2146.33
379.747	17.7893	102.58	1579.52	119.228	2185.59
381.746	22.3055	109.206	1628.89	119.738	2221.18
383.744	25.8747	112.744	1683.41	125.623	2253.56
385.743	19.697	103.691	1730.28	129.842	2284.81
387.742	5.23866	98.2001	1788.05	135.839	2312.46
389.74	2.48299	97.8758	1843.67	139.324	2345.6
391.739	1.4327	98.1512	1893.85	140.252	2387.03
393.738	0	96.9596	1936.39	139.681	2435.46
395.736	-1.13677	95.6383	1951.4	135.762	2486.3
397.735	-1.49618	93.2436	1959.35	135.903	2530.38
399.734	-0.856814	91.8757	1974.21	138.808	2585.89
401.732	0.761961	90.5074	2003.02	141.362	2640.96
403.731	3.8572	89.4153	2037.11	143.089	2681.83
405.73	8.49384	88.4636	2082.71	141.719	2715.05
407.728	15.1004	88.1049	2134.55	138.516	2737.03
409.727	22.6314	87.8153	2192.72	138.411	2752.76
411.726	31.0651	88.5135	2242.67	134.422	2764.74
413.724	35.9535	88.9473	2266.23	132.114	2766.3
415.723	40.9138	90.0254	2280.65	137.142	2771.21
417.722	44.327	90.9818	2300.72	144.467	2777.69
419.72	34.6889	91.6256	2323.69	150.575	2795.46
421.719	27.9665	91.9314	2315.42	156.818	2825.93
423.718	30.4475	90.3926	2308.03	165.823	2849.29
425.716	33.8804	89.9187	2313.01	174.912	2855.51
427.715	37.9628	88.4434	2332.43	189.028	2859.98
429.714	43.6213	88.6593	2346.44	206.412	2864.16
431.712	49.1441	90.3703	2366.63	224.417	2865.22
433.711	54.3873	92.7972	2392.16	243.744	2872.35
435.71	51.7145	95.7554	2419.76	258.082	2880.59
437.708	48.1557	98.6118	2444.11	262.775	2895.75
439.707	42.3062	96.3204	2467.17	259.067	2912.63
441.706	42.9775	93.9934	2477.34	265.817	2930.24
443.704	46.3155	90.5806	2498.11	270.952	2948.5
445.703	49.8785	88.2749	2475.22	276.157	2969.74
447.702	50.5449	87.1518	2466.45	279.391	2988.49
449.7	50.2568	87.1361	2468.62	289.365	3015.9
451.699	50.5391	85.4105	2475.19	304.382	3033.1
453.698	50.1343	85.6269	2482.49	327.151	3048.28
455.696	49.5283	86.6549	2478.08	353.223	3052.56
457.695	47.0513	88.6862	2465.18	384.634	3042.43
459.694	46.0424	88.046	2473.2	419.19	3027.79
461.692	47.4252	87.1628	2498.22	452.256	2997.02
463.691	50.3758	87.1527	2528.07	495.618	2971.1
465.69	55.8865	88.454	2544.99	541.342	2946.19
467.688	63.2599	89.6792	2581.5	581.035	2920.08
469.687	73.6514	91.3887	2629.73	608.408	2900.43
471.686	86.1553	93.0609	2656.55	632.758	2885.33
473.684	100.797	92.6345	2648.37	650.786	2882.66
475.683	115.397	87.9685	2636.55	675.309	2885.85
477.682	117.997	87.4296	2639.5	702.122	2882.91
479.68	121.975	88.0742	2658.21	729.088	2868.46
481.679	137.828	89.8588	2678.19	742.926	2861.6
483.678	153.882	91.947	2710.47	762.99	2861.08
485.676	172.505	94.686	2708.42	776.338	2872.08
487.675	189.775	97.3884	2721.3	786.845	2890.63
489.674	202.326	101.588	2729.4	806.355	2923.57
491.672	212.439	106.7	2761.34	842.658	2955.88
493.671	222.611	112.878	2814.24	888.197	2991.71
495.67	233.934	120.465	2888.41	930.68	3027.15
497.668	245.982	127.335	2960.62	979.766	3048.76
499.667	258.432	133.578	3017.88	1008.75	3069.84
501.666	278.759	139.517	3048.05	1029.03	3087.31
503.664	307.641	146.254	3077.83	1060.66	3099.77
505.663	341.992	151.095	3107.56	1103.1	3091.53
507.662	378.905	147.454	3129.23	1142.4	3083.61
509.66	411.557	134.312	3147.94	1173.78	3076.61
511.659	446.403	118.105	3169.62	1210.75	3062.32
513.658	469.143	103.217	3179.98	1260.16	3049.11
515.656	494.06	94.5047	3209.71	1316.04	3048.43
517.655	526.508	89.2932	3224.74	1369.57	3048.22
519.654	566.023	87.096	3241.92	1411.88	3047.69
521.652	604.928	86.7726	3254.87	1451.16	3048.06
523.651	645.145	87.8589	3275.72	1493.88	3045.66
525.65	678.156	91.4383	3307.32	1537.71	3051.9
527.648	713.243	97.8564	3358.69	1590.51	3062.51
529.647	744.815	105.432	3415.06	1640.21	3073.11
531.646	773.386	114.745	3467.66	1681.34	3089.67
533.644	805.942	118.81	3521.67	1712.51	3104.7
535.643	842.078	120.159	3564.84	1746.89	3130.42
537.642	873.857	125.439	3620.26	1782.71	3149.16
539.64	886.271	126.907	3669.45	1813	3155.35
541.639	900.27	124.657	3722.75	1836.84	3161.43
543.638	912.687	127.569	3774.39	1860.9	3168.65
545.636	917.463	138.616	3823.9	1890.94	3177.72
547.635	925.624	153.811	3884.3	1928.25	3185.58
549.634	933.019	171.148	3948.95	1968.87	3195.76
551.632	941.158	189.776	4008.42	2004.8	3205.62
553.631	950.224	201.379	4040.38	2055.84	3212.69
555.63	972.081	199.537	4049.9	2099.1	3223.05
557.628	1005.48	188.692	4033.24	2128.64	3239.93
559.627	1037.51	178.944	3997.84	2163.23	3273.54
561.626	1074.25	173.264	3961.44	2198.54	3296.99
563.624	1110.07	171.716	3920.48	2232.84	3323.08
565.623	1149.42	175.355	3893.95	2254.99	3351.09
567.622	1196.01	180.002	3875.97	2272.55	3372.54
569.62	1237.43	181.691	3872.48	2279.73	3380.1
571.619	1266.54	180.538	3874.57	2285.92	3397
573.618	1284.92	182.384	3892.21	2287.99	3402.72
575.616	1306.14	186.104	3910.88	2289.47	3385.03
577.615	1338.85	192.484	3894.13	2292.86	3371.07
579.614	1376.43	200.666	3891	2293.06	3353.36
581.612	1427.54	214.237	3873.37	2303.2	3349.36
583.611	1492.79	229.551	3872.46	2319.87	3349.75
585.61	1550.72	252.349	3871.97	2346.44	3349.25
587.608	1592.77	277.819	3887.67	2383.07	3354.18
589.607	1618.08	309.114	3908.74	2413.24	3362.23
591.606	1633.81	340.122	3889.28	2438.04	3371.08
593.604	1637.41	364.829	3876.71	2464.92	3392.06
595.603	1647.89	378.179	3874.41	2491.09	3406.75
597.602	1664.83	388.023	3881.17	2519.33	3410.25
599.6	1688.04	396.272	3880.46	2550.97	3414.55
601.599	1723.66	413.876	3873.92	2586.4	3420.38
603.598	1746.43	439.605	3876.48	2612.42	3426.62
605.596	1756.36	476.788	3888.72	2631.81	3441.29
607.595	1770.66	517.183	3902.53	2649.12	3454.21
609.594	1778.47	568.16	3912.11	2660.22	3469.19
611.592	1776.12	623.601	3940.06	2663.49	3487.68
613.591	1784.52	681.312	3977.73	2669.06	3498.92
615.59	1807.23	735.695	4018.7	2675.5	3500.9
617.588	1843.29	793.437	4076.17	2683.66	3504.9
619.587	1882.04	857.543	4136.67	2702.97	3506.53
621.586	1918.33	937.137	4187.82	2721.07	3513.78
623.584	1938.45	1024.47	4219.21	2749.08	3524.89
625.583	1956.3	1117.85	4208.93	2781.33	3536.67
627.582	1977.53	1214.86	4183.21	2813.66	3545.23
629.58	1999.98	1313.79	4170.3	2852.79	3554.5
631.579	2030.66	1412.9	4160.84	2895.84	3564.39
633.578	2060.9	1516.72	4146.97	2931.81	3587.63
635.576	2080	1618.22	4117.89	2970.74	3622.66
637.575	2100.77	1716.67	4097.86	3018.2	3673.88
639.574	2127.79	1798.34	4089.15	3071.68	3720.19
641.572	2141.07	1868.64	4077.79	3136.9	3746.85
643.571	2149	1927.54	4061.76	3210.46	3766.05
645.57	2165.23	1973.18	4041.28	3286.55	3773.58
647.568	2170.45	2016.43	4034.46	3335.58	3779.35
649.567	2169.21	2066.79	4032.73	3385.84	3779.7
651.566	2176.19	2127.02	4037.15	3440.79	3783.53
653.564	2194.5	2186.5	4029.54	3513.12	3788.4
655.563	2218.47	2233.76	4031.66	3593.89	3797.14
657.562	2233.27	2284.18	4045.79	3691.69	3802
659.56	2253.85	2315.42	4068.2	3791.31	3817.12
661.559	2268.16	2340	4092.26	3902.94	3828.34
663.558	2268.75	2356.86	4093.74	4010.91	3846.75
665.556	2283.64	2373.26	4092.97	4110.8	3861.18
667.555	2300.14	2372.77	4099.98	4167.7	3865.55
669.554	2306.45	2368.02	4115.51	4195.25	3858.32
671.552	2314.28	2356.57	4140.53	4203.17	3847.41
673.551	2321.34	2353.23	4182.18	4189.96	3838.81
675.55	2317.91	2349.92	4220.79	4159.79	3817.02
677.548	2304.53	2355.44	4260.14	4109.13	3813.24
679.547	2281.63	2372.22	4286.42	4056.55	3821.52
681.546	2265.14	2393.7	4295.54	4039.96	3823.96
683.544	2258.51	2414.18	4274.89	4010.33	3829.25
685.543	2270.07	2423.14	4238.03	3975.88	3832.98
687.542	2278.96	2418.35	4191.9	3947.32	3839.8
689.54	2284.6	2417.86	4139.77	3938.39	3848.92
691.539	2287.82	2426.84	4086.62	3946.63	3852.92
693.538	2287.19	2452.09	4035.27	3957.61	3855.25
695.536	2270.88	2473.72	3990.46	3958.78	3852.54
697.535	2262.16	2481.12	3948.47	3950.7	3851.06
699.534	2266.47	2491.69	3914.05	3936.58	3844.34
701.532	2283.6	2505.22	3891.41	3923.31	3842.22
703.531	2302.91	2524.08	3877.2	3902	3840.92
705.53	2310.23	2537.01	3880.33	3898.17	3847.77
707.528	2303.54	2556.65	3896.3	3903.47	3853.62
709.527	2300.89	2575.87	3916	3917.62	3856.84
711.526	2301.35	2593.84	3944.65	3933.49	3858.77
713.524	2297.21	2615.73	3962.63	3929.07	3856.67
715.523	2297	2636.65	3985.25	3929.41	3859.68
717.522	2284.72	2656.75	3982.94	3932.81	3857.37
719.52	2272.01	2675.1	3958.23	3926.43	3858.78
721.519	2273.67	2689.32	3933.17	3927.81	3860.72
723.518	2282.26	2706.53	3915.38	3927.02	3865.37
725.516	2305.86	2729.37	3911.64	3928.87	3869.19
727.515	2334.28	2752.47	3923.13	3941.25	3883.66
729.514	2364.27	2767.24	3948.9	3949.68	3897.97
731.512	2409.17	2785.73	3974.04	3942.32	3899.26
733.511	2458.72	2807.21	3977.38	3936.29	3891.07
735.51	2488.86	2823.73	3967.79	3929.65	3875.51
737.508	2523.13	2849.65	3961.8	3917.58	3863.93
739.507	2547.82	2873.18	3967.45	3899.69	3839.12
741.506	2562.71	2894.84	3992.79	3871.61	3831.08
743.504	2578.63	2910.45	4017.02	3843.42	3831.99
745.503	2584.44	2934.86	4032.9	3811.93	3844.79
747.502	2578.59	2965.18	4029.57	3773.58	3861.05
749.5	2559.41	2997.33	4026.25	3750.11	3878.27
751.499	2553.03	3035.3	4023.52	3742.69	3892.86
753.498	2553.26	3070.89	4022.7	3754.19	3904.31
755.496	2564.5	3109.09	4019.71	3773.39	3914.8
757.495	2590.68	3137.55	4014.87	3793.94	3921.21
759.494	2620.1	3183.35	4013.67	3821.73	3916.54
761.492	2636.05	3230.3	4012.57	3843	3915.5
763.491	2649.38	3292.34	4012.27	3853.45	3906.13
765.49	2661.48	3376.13	4017.11	3857.27	3895.53
767.488	2689.26	3476.37	4018.61	3834.6	3889.1
769.487	2722.98	3581.74	4026.75	3820.77	3882.79
771.486	2756.52	3701.74	4025.58	3817.65	3870.93
773.484	2791.53	3808.44	4027.63	3833.29	3860.09
775.483	2824.13	3886.51	4044.63	3860.09	3855.97
777.482	2862.68	3928.42	4084.02	3898.21	3854.07
779.48	2897.14	3915.34	4115.79	3931.5	3880.35
781.479	2912.75	3881.1	4141.53	3961.55	3923.34
783.478	2905.65	3836.03	4171.45	3981.59	3985.39
785.476	2877.48	3784.07	4187.55	4000.99	4054.59
787.475	2852.44	3716.42	4182.51	4016.99	4095.32
789.474	2845.85	3629.17	4166.13	4018.98	4124.19
791.472	2854.09	3537.44	4155.9	4023.09	4140.6
793.471	2861.25	3446.81	4154.85	4019.83	4153.69
795.47	2868.32	3379.74	4164.69	4002.88	4167.41
797.468	2855.74	3329.82	4181.98	3980.84	4172.87
799.467	2850.52	3282.33	4191.61	3962.34	4194.06
801.466	2847.12	3252.76	4200.55	3949.98	4207.24
803.464	2828.16	3231.41	4198.32	3939.19	4210.13
805.463	2799.92	3219.82	4198.52	3931.62	4207.34
807.462	2786.7	3220.74	4181.19	3919.85	4208.16
809.46	2790.52	3218.16	4161.78	3910.53	4199.61
811.459	2824.26	3218.49	4147.09	3893.95	4196.59
813.458	2855.57	3223.34	4146.21	3875.26	4191.98
815.456	2865.82	3228.97	4147.58	3859.77	4198.76
817.455	2866.45	3229.7	4153.42	3851.92	4199.36
819.454	2859.98	3229.11	4154.99	3846.6	4206.91
821.452	2837.96	3212.88	4164.27	3851.92	4215.1
823.451	2822.55	3195.94	4170.05	3865.04	4217.55
825.45	2825.43	3189.16	4185.49	3874.09	4217.55
827.448	2840.54	3199.96	4215.83	3890.5	4217.25
829.447	2844.07	3207.21	4246.39	3905.32	4209.79
831.446	2830.24	3215.42	4273.51	3928.98	4199.04
833.444	2834.32	3236.03	4305.09	3958.67	4191.69
835.443	2843.25	3264.3	4331.64	3976.69	4181.52
837.442	2863.26	3249.24	4348.58	4006.04	4175.69
839.44	2872.75	3234.97	4371.32	4031.82	4166.99
841.439	2879.57	3232.62	4393.18	4046.09	4153.23
843.438	2887.63	3242.06	4401.5	4049.81	4136.88
845.436	2889.47	3240.75	4402.94	4036.87	4124.73
847.435	2884.24	3239.19	4389.14	4013.27	4113.73
849.434	2889.7	3227.92	4374.04	3981.63	4118.04
851.432	2913.99	3219.92	4359.74	3953.53	4126.32
853.431	2927	3225.05	4330.08	3924.31	4135.18
855.43	2931.95	3239	4299.66	3911.33	4144.47
857.428	2945.91	3244.91	4271.42	3904.77	4158.69
859.427	2943.47	3241.16	4241.65	3917.16	4168.83
861.426	2942.41	3210.79	4220.23	3941.87	4177.39
863.424	2947.46	3192.5	4202.27	3979.54	4178.43
865.423	2947.24	3178.97	4187.98	4034.41	4177.96
867.422	2918.54	3179.02	4183.43	4097	4180.09
869.42	2864.69	3192.35	4182.73	4163.54	4188.67
871.419	2829.43	3216.44	4191.49	4224.4	4212.22
873.418	2830.73	3237.63	4204.62	4289.56	4237.28
875.416	2855.33	3244.68	4212.07	4352.91	4262.43
877.415	2872.5	3264.88	4219.54	4388.33	4283.74
879.414	2891.12	3294.86	4230.62	4395.85	4306
881.412	2909.66	3322.53	4222.05	4379.51	4332.67
883.411	2903.32	3336.49	4212.5	4344.7	4349.99
885.41	2890.51	3364.12	4206.71	4289.95	4368.41
887.408	2891.8	3396.82	4189.18	4223.31	4390.61
889.407	2902.64	3414.26	4176.81	4168.43	4402.7
891.406	2895.94	3400.01	4177.2	4141.78	4414.54
893.404	2864.75	3400.54	4193.12	4125.25	4420.97
895.403	2847.99	3414.86	4220.56	4119.46	4417.74
897.402	2843.09	3448.27	4238.54	4122.4	4408.05
899.4	2838.96	3488.64	4256.1	4134.98	4401.59
901.399	2830.13	3484.97	4267.18	4142.46	4394.58
903.398	2813.23	3486.55	4258.76	4139.52	4416.37
905.396	2799	3447.76	4241.6	4124.52	4465.04
907.395	2789.41	3397.74	4222.68	4110.96	4562.73
909.394	2786.74	3348.94	4207.12	4093.52	4711.79
911.392	2790.78	3314.41	4188.21	4081.82	4912.8
913.391	2802.75	3279.5	4174.27	4082.14	5175.92
915.39	2829.76	3262.51	4171.24	4084.68	5492.84
917.388	2850.87	3269.05	4180.05	4088.76	5836.98
919.387	2852.45	3291.98	4193.2	4097.49	6199.27
921.386	2860.52	3316.76	4204.23	4115.29	6551.32
923.384	2871.81	3336.25	4212.3	4128.59	6842.83
925.383	2872.08	3359.17	4219.48	4131.37	7072.73
927.382	2871.83	3371.8	4227.73	4127.63	7221.11
929.38	2875.55	3376.99	4240.1	4111.01	7306.09
931.379	2869.7	3380.57	4247.46	4092.2	7315.49
933.378	2870.59	3381.92	4237.93	4065.17	7267.66
935.376	2870.08	3364.38	4228.57	4048.83	7152.14
937.375	2858.91	3342.57	4227.66	4051.86	6960.5
939.374	2857.47	3323.71	4234.12	4067.37	6708.39
941.372	2857.53	3300.14	4230.79	4103.3	6392.25
943.371	2850.56	3273.15	4226.66	4143.22	6064.3
945.37	2840.61	3250.05	4224.82	4181.23	5743.23
947.368	2834.52	3231.65	4215.88	4212.12	5470.14
949.367	2829.77	3224.9	4205.72	4240.25	5253.81
951.366	2824.65	3228.38	4197.68	4276.45	5067.85
953.364	2837.35	3242.11	4202.92	4310.15	4917.98
955.363	2852.6	3253.57	4224.74	4351.76	4792.56
957.362	2863.83	3252.91	4260.94	4396.37	4678.34
959.36	2866.74	3230.16	4286.9	4445.06	4580.14
961.359	2875.36	3215.67	4310.78	4492.07	4506.46
963.358	2897.52	3204.91	4328.48	4534.66	4431.19
965.356	2909.88	3186.32	4335.94	4548	4363.59
967.355	2908.27	3160.27	4331.37	4562.81	4305.13
969.354	2910.1	3135.25	4325.33	4573.92	4251.93
971.352	2915.36	3112.82	4315.1	4560.08	4225.52
973.351	2926.71	3100.39	4305.51	4522.69	4212.15
975.35	2930.32	3104.99	4306.6	4466.14	4206.49
977.348	2927.52	3121.06	4314.99	4391.89	4221.65
979.347	2914.64	3147.37	4328.22	4310.88	4248.15
981.346	2882.6	3168.83	4338.4	4255.63	4276.35
983.344	2858.87	3202.05	4350.87	4249.75	4302.84
985.343	2846.27	3242.21	4360.48	4250.71	4331.9
987.342	2857.16	3278.37	4370.61	4259.62	4358.79
989.34	2883.16	3322.25	4384.05	4278.03	4380.5
991.339	2911.68	3372.29	4387.4	4301.42	4389.44
993.338	2927.86	3414.51	4375.49	4328.22	4392.66
995.336	2925.68	3432.76	4364.31	4351.97	4401.43
997.335	2927.71	3448.84	4356.21	4364.6	4416.83
999.334	2915.01	3471.64	4347.95	4366.19	4445.92
1001.33	2888.05	3484.95	4338.48	4346.12	4499.73
1003.33	2882.11	3455.46	4318.13	4308.03	4565.14
1005.33	2901.47	3401.17	4295.23	4268.38	4627.28
1007.33	2925.03	3349.39	4274.88	4221.15	4651.82
1009.33	2939.24	3310.21	4262.65	4181.92	4654.19
1011.33	2955.91	3293.53	4252.74	4153.04	4635.73
1013.32	2957.72	3288.18	4232.59	4141.99	4603.22
1015.32	2930.26	3281.01	4211.04	4138.98	4559.32
1017.32	2904.35	3276.55	4201.35	4133.99	4500.52
1019.32	2911	3282.37	4204.59	4124.79	4452.62
1021.32	2942.7	3268.6	4220.78	4121.17	4411.21
1023.32	2962.81	3233.69	4235.3	4116.16	4366.14
1025.32	2974.62	3206.7	4252.49	4124.21	4330.61
1027.32	2964.57	3196.31	4274.84	4142.17	4328.14
1029.31	2954.4	3199.85	4306.8	4168.04	4327.25
1031.31	2927.45	3217.96	4339.24	4197.93	4324.72
1033.31	2900.29	3222.93	4359.76	4230.82	4321.26
1035.31	2877.41	3227.93	4389.07	4258.49	4307.13
1037.31	2878.15	3251.34	4428.27	4280.22	4289.39
1039.31	2873.97	3261.84	4473.62	4292.96	4274.91
1041.31	2879.04	3265.3	4514.44	4303.67	4271.18
1043.3	2888.97	3272.23	4531.27	4304.27	4276.08
1045.3	2889.85	3265.16	4517.85	4303.17	4270.07
1047.3	2871.31	3262.44	4466.43	4291.17	4264.08
1049.3	2858.51	3273.74	4394.82	4263.16	4264.14
1051.3	2842.53	3289.02	4316.59	4229.24	4266.09
1053.3	2827.94	3309.27	4249.11	4183.02	4277.87
1055.3	2834.06	3326.89	4210.55	4146.56	4286.04
1057.3	2852.22	3338.9	4190.99	4139.47	4282.06
1059.29	2880.47	3343.79	4186.05	4154.94	4271.82
1061.29	2901.08	3342.44	4187.63	4167.08	4252.59
1063.29	2907.97	3344.84	4179.4	4168.69	4229.95
1065.29	2934.39	3342.73	4175.17	4157.45	4202.94
1067.29	2959.58	3351.48	4185.2	4154.82	4187.97
1069.29	2987.38	3377.4	4210.88	4163.49	4184.33
1071.29	3013.4	3387.77	4247.17	4174.41	4191.98
1073.28	3025.27	3386.23	4265.53	4172.28	4214.64
1075.28	3025.86	3355.73	4276.89	4162.35	4248.19
1077.28	3025.2	3325.64	4282.46	4146.9	4299.74
1079.28	3034.58	3312.07	4287.94	4131.44	4372.45
1081.28	3045.09	3313.66	4298.6	4119.67	4454.93
1083.28	3033.18	3302.07	4312.82	4119.23	4539.47
1085.28	3015.18	3292.42	4322.86	4124.76	4604.99
1087.28	3000.04	3280.1	4323.05	4140.8	4653.63
1089.27	2990.9	3254.06	4325.25	4165.05	4692.19
1091.27	2982.83	3226.8	4310.43	4203.86	4713.49
1093.27	2953.53	3211.73	4285.76	4253.31	4714.2
1095.27	2923.88	3195.52	4262.7	4301.01	4707.76
1097.27	2896.18	3182.72	4246.07	4341.85	4686.9
1099.27	2877.86	3171.03	4232.25	4373.01	4648.84
1101.27	2880.12	3177.66	4228.36	4395.96	4598.69
1103.26	2887.09	3204.99	4228.31	4406.18	4539.49
1105.26	2877.13	3222.59	4224.48	4396.52	4473.72
1107.26	2876.78	3236.87	4233.28	4389.27	4420.93
1109.26	2864.35	3255.16	4258.48	4378.93	4387.54
1111.26	2852.08	3266.19	4295.83	4364.56	4360.12
1113.26	2857.21	3283.19	4345.09	4347.67	4344.61
1115.26	2859.77	3297.59	4393.15	4337.71	4344.77
1117.26	2852.44	3300.54	4398.14	4343.55	4348.76
1119.25	2855.57	3308.08	4383.19	4360.89	4355.03
1121.25	2868.57	3320.37	4349.58	4370.69	4353.15
1123.25	2873.63	3324.11	4304.36	4370.42	4349.16
1125.25	2874.54	3307.4	4257.37	4390.73	4344.43
1127.25	2866.78	3286.25	4211.97	4412.21	4333.6
1129.25	2871.7	3268.86	4185.09	4418.94	4322.8
1131.25	2887.65	3251.02	4157.46	4450.23	4311.12
1133.24	2902.14	3236.06	4126.72	4488.96	4295.06
1135.24	2896.44	3229.12	4099.64	4542.61	4280.52
1137.24	2891.72	3232.15	4081.31	4592.09	4269.42
1139.24	2889.13	3246.98	4070.86	4628.33	4272.74
1141.24	2900.98	3282.63	4078.3	4647.64	4277.19
1143.24	2918.12	3304.5	4104.15	4651.78	4302.57
1145.24	2920.24	3319.94	4136.73	4642.1	4329.99
1147.24	2931.71	3309.72	4179.65	4619.49	4328.63
1149.23	2935.09	3273.71	4226.18	4582.28	4314.83
1151.23	2936.02	3238.94	4263.38	4543.29	4300.07
1153.23	2924.75	3202.71	4282.96	4500.03	4292.53
1155.23	2903.93	3170.23	4281.36	4453.46	4298.34
1157.23	2906.18	3148.11	4264.27	4412.67	4307.3
1159.23	2898.22	3131.35	4236.92	4381.17	4328.24
1161.23	2904.16	3137.23	4204.71	4347.83	4344.16
1163.22	2915.71	3140.47	4170.68	4331.46	4351.04
1165.22	2907.32	3148.75	4140.37	4336.51	4355.01
1167.22	2889.84	3156.02	4116.3	4350.04	4353.35
1169.22	2886.22	3150.75	4107.31	4368.8	4335.74
1171.22	2883.89	3155.22	4106.33	4397.48	4311.82
1173.22	2905.15	3172.59	4118.18	4433	4285.12
1175.22	2936.14	3188.56	4109.09	4465.45	4248.33
1177.22	2951.27	3205.5	4101.58	4500.4	4229.62
1179.21	2976.53	3217.2	4107.66	4518.46	4223.3
1181.21	3026.49	3219.56	4119.66	4520.54	4214.03
1183.21	3081.19	3224.81	4123.73	4506.94	4196.65
1185.21	3114.25	3234.86	4130.8	4478.16	4180.86
1187.21	3139.99	3262.66	4147.95	4431.51	4162.12
1189.21	3162.96	3292.13	4159.01	4372.92	4153.46
1191.21	3179.2	3307.79	4171.49	4305.89	4152.28
1193.2	3181.23	3315.84	4182.89	4236.04	4155.29
1195.2	3150.41	3329.51	4187.19	4177.63	4165.42
1197.2	3089.36	3326.26	4177.47	4140.45	4177.12
1199.2	3035.32	3311.98	4153.62	4112.67	4193.29
1201.2	3004.06	3298.92	4124.63	4082.52	4212.47
1203.2	2994.69	3283.14	4102.12	4049.18	4230.4
1205.2	2981.28	3272.15	4090.06	4027.22	4245.09
1207.2	2946.31	3270.37	4086.1	4016.95	4255.08
1209.19	2911.76	3278.18	4094.98	4006.67	4257.2
1211.19	2890.41	3267.38	4118.17	4005.87	4258.03
1213.19	2861.19	3251.52	4136.46	4006.52	4254.83
1215.19	2838.11	3233.69	4142.13	4017.9	4250.53
1217.19	2838.31	3216.26	4150.13	4043.89	4244.67
1219.19	2846.06	3205.5	4157.46	4073.63	4243.75
1221.19	2843.84	3209.66	4158.49	4106.86	4247.63
1223.18	2846.48	3207.87	4150.63	4135.66	4263.78
1225.18	2847.5	3209.82	4134.19	4155.73	4284.47
1227.18	2860.26	3217.99	4115.92	4168.69	4308.43
1229.18	2870.81	3234.94	4084.81	4168.35	4325.89
1231.18	2872.32	3236.1	4042.22	4159.02	4344.14
1233.18	2853.9	3227.45	4002.36	4143.85	4362.39
1235.18	2844.94	3228.37	3968.75	4121.38	4378.59
1237.18	2840.79	3240.09	3942.13	4087.65	4371.62
1239.17	2842.94	3245.37	3928.02	4044.4	4364.05
1241.17	2831.56	3250.33	3930.92	3998.22	4353.51
1243.17	2815.33	3255.19	3944.99	3967.47	4350.34
1245.17	2802.62	3257.87	3962.2	3971.88	4359.39
1247.17	2766.58	3263.28	3971.79	3978.32	4368.52
1249.17	2738.82	3253.49	3976.24	3989.22	4374
1251.17	2712.83	3240.86	3979.33	4002.18	4374.69
1253.16	2707.15	3239.91	3979.28	4022.62	4373.81
1255.16	2706.26	3248.56	3976.25	4048.1	4369.09
1257.16	2716.03	3267.94	3977.7	4077.86	4356.83
1259.16	2730.94	3280.89	3988.41	4111.93	4340.69
1261.16	2736.84	3293.45	4000.89	4144.13	4324.55
1263.16	2745.64	3300.76	4017.47	4173.19	4306.74
1265.16	2751.78	3305	4024.45	4208.21	4287.13
1267.16	2760.3	3303.4	4022.45	4242.74	4281.07
1269.15	2751.61	3289.02	4023.98	4278.58	4277.94
1271.15	2744.58	3280.71	4035.86	4311.46	4275.51
1273.15	2734.82	3288.78	4053.12	4339.57	4278.43
1275.15	2720.23	3307.63	4065.61	4352.34	4289.11
1277.15	2721.95	3333.73	4067.54	4353.2	4308.71
1279.15	2716.29	3363.94	4061.34	4346.07	4340.59
1281.15	2711.37	3395.02	4057.19	4322.44	4383.76
1283.14	2722.68	3419.82	4049.05	4292.26	4434.99
1285.14	2736.06	3456.62	4031.94	4262.57	4488.01
1287.14	2761.85	3498.82	4010.42	4239.88	4532.58
1289.14	2786.22	3523.73	3997.36	4220.66	4563.75
1291.14	2800.51	3535.15	3995.29	4206.64	4575.03
1293.14	2817.29	3531.58	3998.94	4203.04	4570.87
1295.14	2835.84	3507.63	4007.28	4189.04	4540.75
1297.14	2829.6	3486.42	4025.04	4180.25	4506.33
1299.13	2813.69	3480.25	4052.55	4180.63	4461.79
1301.13	2807.24	3484.56	4081.49	4182.79	4423.61
1303.13	2805.29	3492.42	4102.6	4193.93	4382.68
1305.13	2814.38	3503.02	4131.36	4208.29	4340.5
1307.13	2823.77	3503.4	4146.75	4228.2	4305.55
1309.13	2823.72	3510.92	4161.45	4253.14	4277.75
1311.13	2819.67	3520.78	4173.26	4279.34	4249.42
1313.12	2802.44	3522.42	4154.08	4315.73	4214.27
1315.12	2786.72	3527.88	4140.74	4343.62	4180.03
1317.12	2771.54	3535.66	4122.89	4349.81	4151.05
1319.12	2780.93	3542.25	4105.63	4332.29	4138.58
1321.12	2789.86	3546.97	4095.96	4299.47	4132.19
1323.12	2810.71	3557.84	4093.31	4261.97	4133.33
1325.12	2818.78	3571.97	4082.18	4221.67	4138.39
1327.12	2819.5	3590.78	4072.16	4199.57	4146.47
1329.11	2809.6	3616.42	4070.08	4197.97	4160.66
1331.11	2783.38	3642.53	4073.88	4212.02	4170.4
1333.11	2771.96	3657.15	4087.74	4239.81	4173.73
1335.11	2778.49	3662.17	4106.98	4283	4193.67
1337.11	2783.4	3661.67	4116.64	4316.3	4221.77
1339.11	2784.01	3653.24	4120.76	4335.77	4252.68
1341.11	2795.23	3639.95	4121.61	4333.19	4280.18
1343.1	2825.94	3631.09	4127.45	4315.49	4304.12
1345.1	2861.9	3637.58	4134.03	4291.71	4317.45
1347.1	2888.91	3654.14	4156.44	4266.47	4318.5
1349.1	2915.61	3659.47	4188.79	4240.48	4307.32
1351.1	2938.06	3653.17	4224.82	4212.32	4291.61
1353.1	2971.38	3636.09	4249.32	4186.87	4275.85
1355.1	3000.11	3604.92	4258.07	4161.53	4272.1
1357.1	3002.96	3564.81	4251.47	4142.92	4271.94
1359.09	2987.69	3527.16	4247.47	4141.24	4273.02
1361.09	2950.19	3498.09	4251.81	4147.87	4278.09
1363.09	2921.19	3489.59	4249.55	4155.64	4283.55
1365.09	2905.87	3495	4251.78	4153.09	4288.2
1367.09	2897.07	3523.69	4264.72	4144.27	4291.02
1369.09	2890.14	3554.72	4287.09	4147.8	4287.02
1371.09	2872.26	3583.46	4326.58	4166.71	4281.81
1373.08	2835.86	3602.74	4383.12	4202.22	4274.09
1375.08	2823.35	3610.03	4401.11	4243.28	4268.43
1377.08	2831.29	3606.5	4398.66	4298.14	4257.39
1379.08	2844.87	3592.75	4384.75	4356.18	4253.6
1381.08	2853.31	3574.18	4360.35	4415.05	4242.38
1383.08	2866.41	3544.05	4335.53	4454.99	4231.83
1385.08	2867.57	3512.1	4315.7	4482.35	4220.95
1387.08	2856.56	3496.65	4295.44	4489.87	4223.01
1389.07	2828.15	3484.83	4275.08	4480.35	4232.61
1391.07	2801.37	3477.61	4247.95	4445.93	4253.39
1393.07	2781.32	3468.31	4217.7	4395.85	4273.36
1395.07	2763.48	3458.45	4195.37	4339.18	4284.16
1397.07	2744.67	3462.32	4181.55	4281.72	4288.44
1399.07	2740.59	3472.87	4170.05	4228.37	4281.34
1401.07	2734.71	3481.47	4145.37	4181.29	4268.12
1403.06	2740.2	3484.71	4124.19	4130.39	4254.61
1405.06	2752.47	3474.27	4108.33	4094	4247.47
1407.06	2772.48	3458.39	4098.88	4082.96	4262.41
1409.06	2796.2	3446.13	4100.32	4088.06	4285.92
1411.06	2807.1	3435.62	4104.41	4110.58	4309.99
1413.06	2807.71	3431.26	4122.18	4147.18	4334.23
1415.06	2800.14	3418.07	4146.32	4188.8	4349.2
1417.06	2801.71	3393.35	4173.49	4228.46	4357.69
1419.05	2814.98	3368.75	4206.42	4259.72	4353.55
1421.05	2830.6	3348.67	4229.68	4287.17	4345.37
1423.05	2862.96	3338.85	4234.16	4298.55	4339.26
1425.05	2901.95	3334.5	4219.5	4293.67	4335.32
1427.05	2944.63	3325.14	4201.49	4276.35	4336.67
1429.05	2984.18	3327.14	4186.43	4246.35	4344.86
1431.05	3007.7	3345.6	4176.39	4203	4355.68
1433.04	3005.22	3361.82	4163.14	4159.31	4365.02
1435.04	2990.79	3365.05	4141.7	4128.34	4370.56
1437.04	2989.69	3356.58	4118.05	4102.2	4370.28
1439.04	2968.64	3331.85	4094.93	4086.93	4369.29
1441.04	2940.26	3303.78	4075.48	4076.42	4362.98
1443.04	2938.71	3285.36	4065.31	4076.29	4365.79
1445.04	2956.12	3281.17	4063.29	4084.03	4360.2
1447.04	3011.38	3283.74	4062.67	4110.54	4336.24
1449.03	3067.49	3271.35	4067.3	4138.04	4302.2
1451.03	3101.19	3249.11	4086.9	4166.75	4261.32
1453.03	3107.07	3237.65	4110.17	4184.63	4207.97
1455.03	3092.8	3225.06	4118	4187.14	4168.23
1457.03	3039.96	3218.04	4110.79	4203.57	4137.15
1459.03	2953.15	3206.37	4106.94	4224.78	4122.07
1461.03	2872.67	3188.98	4107.32	4253.13	4123.05
1463.02	2802.71	3185.55	4109.54	4270.92	4127.62
1465.02	2765.92	3186.84	4113.57	4278.2	4136.64
1467.02	2763.43	3194.91	4110.9	4274.92	4147.7
1469.02	2767.63	3210.13	4112.54	4264.68	4157.11
1471.02	2781.14	3229.97	4118.82	4241.76	4168.54
1473.02	2786.17	3251	4121.72	4212.25	4183.77
1475.02	2777.51	3262.17	4121.71	4177.33	4194.84
1477.02	2769.82	3261.55	4106.79	4133.02	4205.3
1479.01	2761.74	3257.14	4075.92	4083.44	4200.17
1481.01	2767.78	3263.13	4046.87	4048.8	4179.06
1483.01	2771.3	3268.11	4020.54	4037.76	4157.03
1485.01	2778.89	3272.35	3998.85	4029.96	4126.84
1487.01	2798.45	3269.02	3980.11	4037.78	4101.07
1489.01	2811.95	3252.32	3959.1	4047.81	4070
1491.01	2822.02	3236.72	3933.28	4062.59	4049.14
1493	2825.51	3226.77	3911.27	4079.5	4035.68
1495	2829.98	3218.48	3896.17	4104.57	4029.69
1497	2825.07	3219.02	3876.18	4128.51	4029.93
1499	2804.71	3216.16	3858.42	4136.21	4033.5
1501	2778.11	3216.08	3858.09	4147.29	4045.18
1503	2771.39	3210.86	3871.82	4170.41	4064.17
1505	2772.07	3209.26	3893.04	4193.12	4086.62
1507	2785.87	3218.98	3927.01	4219.78	4108.62
1508.99	2793	3216.85	3956.41	4234.52	4136.66
1510.99	2798.13	3201.79	3972.74	4241.04	4168.33
1512.99	2807.75	3188.33	3969.23	4240	4189.75
1514.99	2820.7	3187.57	3960.95	4237.31	4206.72
1516.99	2826.19	3189.09	3957.91	4226.98	4215.9
1518.99	2805.14	3198.29	3941.55	4227.01	4208.79
1520.99	2785.26	3212.59	3927.59	4230.46	4184.45
1522.98	2788.23	3218.75	3923.37	4229.14	4154.32
1524.98	2792.81	3215.92	3929.74	4225.1	4121.98
1526.98	2782.44	3204.74	3939.05	4216.96	4094.11
1528.98	2773.1	3195.68	3952.53	4200.01	4081.32
1530.98	2743.1	3198.6	3968.87	4168.57	4076.8
1532.98	2704.71	3197.53	3990.66	4141.34	4082.65
1534.98	2691.01	3199.1	4011.71	4115.45	4099.7
1536.98	2689.67	3201.73	4041.09	4102.97	4131.97
1538.97	2685.29	3194.83	4059.31	4096.31	4173.39
1540.97	2697.2	3180.67	4082.75	4101.96	4216.94
1542.97	2709.14	3171.96	4104.48	4116.34	4254.05
1544.97	2718.84	3167.68	4125.26	4135.58	4288.39
1546.97	2728.57	3157.33	4147.61	4149.57	4320.63
1548.97	2727.52	3138.49	4159.19	4155.42	4344.54
1550.97	2743	3121.51	4157.53	4157.93	4347.07
1552.96	2751.61	3119.56	4153.82	4157.6	4340.92
1554.96	2777.77	3121.93	4155.63	4151.56	4336.8
1556.96	2796.83	3137.03	4160.37	4140.37	4332.19
1558.96	2792.88	3152.61	4176.01	4125.3	4332.93
1560.96	2798.53	3163.54	4192.77	4106.97	4344.92
1562.96	2815.7	3171.04	4176.81	4095.96	4357.77
1564.96	2825.62	3180.2	4163.65	4080.88	4370
1566.96	2834.95	3189.82	4158.15	4067.69	4372.76
1568.95	2856.27	3200.44	4161.21	4061.45	4366.6
1570.95	2888.9	3202.16	4167.65	4040.83	4357.21
1572.95	2929.81	3205.04	4159.76	4018.92	4345.65
1574.95	2992.15	3208.34	4146.59	4005.89	4339.91
1576.95	3066.88	3204.03	4137.39	4007.97	4343.29
1578.95	3142.66	3202.82	4123.34	4017.65	4353.75
1580.95	3215.28	3201.02	4106.56	4023.08	4367.65
1582.94	3273.36	3195.85	4096.67	4032.4	4392.17
1584.94	3322.29	3192.02	4094.01	4034.34	4425.84
1586.94	3367.73	3199.58	4086.4	4036.41	4476
1588.94	3402.89	3215.47	4063.06	4036.45	4547.2
1590.94	3414.53	3223.86	4040.34	4029.59	4628.45
1592.94	3402.48	3223.57	4025.34	4022.36	4724.87
1594.94	3367.63	3223.23	4015.76	4007.86	4838.91
1596.94	3329.42	3224.09	4008.64	3998.96	4939.57
1598.93	3309.93	3228.62	4010.4	3999.05	4986.28
1600.93	3296.49	3228.57	4018.26	4001.23	5006.19
1602.93	3306.01	3229.72	4048.79	4007.84	4999.95
1604.93	3320.45	3226.51	4102.03	4018.53	4972.02
1606.93	3312.49	3216.6	4178.42	4039.94	4927.14
1608.93	3300.61	3193.52	4256.04	4072.29	4857.93
1610.93	3270.88	3165.37	4310.51	4121.98	4791.61
1612.92	3243.13	3136.39	4294.39	4184.09	4744.82
1614.92	3214.15	3104.61	4251.7	4262.37	4684.43
1616.92	3177.55	3077.49	4198.62	4343.77	4610.27
1618.92	3146.64	3059.11	4145.87	4425.65	4533.26
1620.92	3133.97	3040.35	4104.11	4499.56	4451.58
1622.92	3138.57	3025.91	4097.01	4553.91	4391.32
1624.92	3168.45	3035.23	4096.39	4593.29	4362.7
1626.92	3245.52	3052.44	4081.89	4610.41	4328.74
1628.91	3364.88	3069.02	4063.39	4603.19	4301.7
1630.91	3509.29	3073.08	4046.85	4580.41	4284.69
1632.91	3669.57	3076.9	4033.63	4536	4277.13
1634.91	3778.25	3077.97	4020.56	4483.37	4269.94
1636.91	3873.35	3070.19	4005.64	4426.84	4262.99
1638.91	3922.05	3064.51	3996	4358.34	4250.44
1640.91	3923.69	3063.96	3994.19	4295.72	4236.88
1642.9	3869.35	3064.37	3986.85	4238.95	4222.55
1644.9	3763.52	3070.94	3981.84	4187.18	4208.84
1646.9	3635.88	3079.86	3978.44	4137.71	4209.53
1648.9	3488.67	3091.98	3967.9	4090.64	4218.23
1650.9	3348.32	3090.78	3960.26	4058.7	4230.71
1652.9	3291.45	3081.27	3953.79	4046.91	4243.89
1654.9	3250.6	3077.99	3950.34	4039.42	4250.02
1656.9	3217.06	3081.68	3954.94	4031.6	4255.77
1658.89	3204.49	3084.14	3967.33	4026.06	4251.81
1660.89	3182.74	3096	3994.9	4035.69	4244.35
1662.89	3169.29	3115.62	4025.06	4052.03	4237.74
1664.89	3150.22	3143.17	4050.04	4070.63	4229.91
1666.89	3107.24	3164.88	4058.96	4085.17	4221.42
1668.89	3063.17	3175.9	4071.32	4097.2	4218.57
1670.89	3041.74	3188.76	4091.27	4111.19	4214.86
1672.88	3042.59	3191.85	4107.54	4119.89	4206.97
1674.88	3041.35	3168.37	4123.45	4123.48	4192.56
1676.88	3038.82	3132.48	4144.41	4139.5	4177.11
1678.88	3019.33	3098.31	4169.4	4165.93	4161.98
1680.88	2996.78	3081.67	4204.87	4188.76	4141.35
1682.88	2979.73	3089.99	4252.59	4206.46	4131.02
1684.88	2970.33	3100.28	4318.31	4208.67	4129.14
1686.88	2954.5	3113.73	4405.2	4207.26	4142.65
1688.87	2940.79	3111.58	4508.32	4189.16	4165.3
1690.87	2930.77	3102.96	4623.54	4165.8	4186.12
1692.87	2928.18	3098.62	4735.74	4141.11	4197.47
1694.87	2924.01	3096.09	4818.86	4119.6	4197.74
1696.87	2925.59	3088.16	4828.4	4097.87	4183.91
1698.87	2922.17	3076.59	4801.72	4086.83	4161.58
1700.87	2914.3	3056.8	4750.44	4077.83	4131.66
1702.86	2897.63	3036.12	4680.5	4070.02	4091.16
1704.86	2881.86	3016.96	4600.36	4061.68	4058.23
1706.86	2860.75	3008.48	4510.77	4067.27	4030.99
1708.86	2843.56	3001.18	4415.48	4085.45	4007.01
1710.86	2841.26	2998.69	4325.7	4099.55	3986.59
1712.86	2839.97	3004.34	4266.42	4102.74	3973.32
1714.86	2842.84	3016.09	4224	4096.3	3974.31
1716.86	2853.74	3032.37	4171.22	4088.31	3992.46
1718.85	2865.23	3044.2	4134.02	4082.7	4016.88
1720.85	2869.36	3056.15	4109.35	4084	4037.05
1722.85	2857.86	3060.76	4107.53	4085.48	4054.1
1724.85	2849.02	3059.42	4111.11	4093.79	4068
1726.85	2851.77	3062.81	4115.36	4110.35	4073.12
1728.85	2848.36	3075.41	4122.12	4122.65	4070.56
1730.85	2843.27	3103.55	4130.39	4130.54	4066.64
1732.84	2833.97	3129.68	4146.27	4142.55	4059.32
1734.84	2829.84	3140.94	4156.76	4155.56	4061.51
1736.84	2827.31	3146.59	4170.73	4155.28	4068.17
1738.84	2828.57	3143.66	4196.91	4153.42	4083.17
1740.84	2831.58	3133.65	4230.81	4144.13	4107.24
1742.84	2824.9	3117.94	4247.29	4132.99	4132.4
1744.84	2814.84	3101.85	4222.63	4118.16	4167.23
1746.84	2810.19	3080.34	4180.56	4102.46	4191.9
1748.83	2811.3	3054.62	4130.95	4092.33	4205.91
1750.83	2819.82	3024.03	4088.05	4088.81	4208.51
1752.83	2831.99	2994.94	4060.8	4085.44	4201.21
1754.83	2850.53	2985.48	4053.44	4074.86	4194.88
1756.83	2864.2	2986.26	4052.12	4064.83	4192.2
1758.83	2875.61	2996.43	4055.81	4047.46	4200.94
1760.83	2869.37	3009.22	4065.72	4034.33	4209.52
1762.82	2856.29	3024.9	4076.91	4020.8	4218.01
1764.82	2849.39	3034.28	4079.15	4004.45	4224.49
1766.82	2839.95	3043.5	4068.75	3992.83	4232.26
1768.82	2824.61	3060.58	4062.65	3986.17	4235.62
1770.82	2808.67	3068.12	4064.87	3982.61	4236.32
1772.82	2814.22	3073.23	4064.08	3978.9	4231.3
1774.82	2814.63	3087.09	4069.25	3978.23	4223.81
1776.82	2810.91	3101.42	4082.55	3973.24	4212.71
1778.81	2811.1	3111.62	4096.62	3967.73	4197.89
1780.81	2814.05	3112.68	4102.84	3966.76	4186.75
1782.81	2812.08	3115.31	4101.86	3975.57	4179.83
1784.81	2800.26	3137.23	4097.25	3991.79	4172.27
1786.81	2793.95	3182.1	4082.35	4005.23	4161.68
1788.81	2790.36	3248.99	4065.73	4029.2	4145.32
1790.81	2789.71	3337.94	4037.75	4058.99	4128.72
1792.8	2791.37	3436.26	4004.82	4088.29	4112.52
1794.8	2789.18	3550.86	3978.84	4113.14	4093.59
1796.8	2787.38	3664.26	3951.47	4129.64	4080.94
1798.8	2785.58	3762.74	3924	4138.11	4066.07
1800.8	2771.69	3823.17	3908.76	4132.37	4051.43
1802.8	2759.61	3834.49	3901.54	4113.4	4041.46
1804.8	2747.15	3786.55	3899.76	4089.02	4038.41
1806.8	2718.01	3706.44	3910.74	4063.1	4039.29
1808.79	2701.04	3619.61	3912.36	4030	4043.42
1810.79	2694.56	3518.91	3907.2	4002.79	4058.26
1812.79	2696.86	3440.07	3909.39	3979.64	4080.02
1814.79	2695.68	3409.95	3909.76	3955.18	4104.36
1816.79	2695.21	3376.5	3902.74	3938.4	4125.35
1818.79	2694.39	3340.6	3900.73	3930.87	4143.89
1820.79	2703.11	3296.88	3909.04	3932.11	4156.94
1822.78	2721.88	3260.54	3928.96	3934.32	4168.44
1824.78	2725.92	3232.29	3963.42	3940.05	4176.06
1826.78	2728.74	3212.49	4008	3948.45	4184.77
1828.78	2735.17	3192.39	4048.16	3952.62	4191.98
1830.78	2736.61	3173.53	4082.9	3959.32	4201.19
1832.78	2732.84	3157.14	4098.81	3964.83	4213.62
1834.78	2723.47	3138.04	4091.13	3971.03	4228.16
1836.78	2711.42	3112.58	4078.55	3979.19	4247.09
1838.77	2701.91	3082.61	4066.25	3993.86	4272.35
1840.77	2691.5	3061.22	4058.33	4005.24	4310.87
1842.77	2680.78	3035.29	4052.45	4024.56	4352.66
1844.77	2678.01	3002.92	4042.21	4048.84	4406.03
1846.77	2672.47	2976.29	4031.27	4075.04	4424.94
1848.77	2665.41	2961.68	4016.96	4089.69	4420.59
1850.77	2663.42	2955.74	4000.98	4106.23	4397.6
1852.76	2660.92	2958.99	3985.77	4112.02	4366.52
1854.76	2651.31	2971.91	3969.99	4115.72	4325.82
1856.76	2641.46	2990.85	3962.27	4119.63	4295.41
1858.76	2650.42	3011.04	3952.07	4126.38	4282.95
1860.76	2668.96	3030.43	3934.13	4122.21	4281.7
1862.76	2696.24	3051.23	3924.41	4111.57	4281.16
1864.76	2723.69	3069.74	3927.25	4096.66	4281.69
1866.76	2749.64	3090.1	3931.82	4076.32	4282.91
1868.75	2765.23	3109.2	3936.91	4073.89	4286.1
1870.75	2766.01	3111.3	3955.55	4078.17	4282.59
1872.75	2755.35	3094.38	3971.73	4078.49	4267.77
1874.75	2735.69	3069.34	3991.45	4076.41	4247.19
1876.75	2740.64	3051.08	4008.22	4066.9	4223.31
1878.75	2750.7	3048.31	4026.34	4058.21	4206.65
1880.75	2758.57	3050.72	4053.99	4052.48	4193.13
1882.74	2764.78	3051.18	4097.4	4048.14	4171.9
1884.74	2773.36	3051.08	4153.88	4045.66	4156.71
1886.74	2771.87	3058	4208.17	4052.91	4148.76
1888.74	2772.94	3066.95	4260.81	4063.79	4136.7
1890.74	2768.46	3074.12	4290.42	4074.3	4124.72
1892.74	2759.76	3073.45	4301.01	4095.78	4111.44
1894.74	2744.92	3073.51	4277.14	4126.02	4102.93
1896.74	2729.88	3074.79	4235.24	4156.73	4098.23
1898.73	2726.01	3071.85	4197.47	4193.32	4093.73
1900.73	2719.11	3080.66	4171.6	4235.2	4079.27
1902.73	2700.9	3100.77	4151.93	4276.46	4072.42
1904.73	2687.35	3098.64	4123.35	4314.98	4071.86
1906.73	2686.02	3085.72	4098.96	4347.97	4077.43
1908.73	2696.4	3079.49	4081.52	4367.29	4088.98
1910.73	2706.24	3087.14	4070.66	4372	4101.91
1912.72	2721.21	3099.08	4066.08	4359.52	4106.5
1914.72	2731.64	3117.82	4066.13	4336.25	4098.04
1916.72	2734.47	3157.79	4061.79	4307.88	4073.18
1918.72	2731.35	3214.42	4045.47	4295.74	4043.7
1920.72	2727.8	3287.81	4036.32	4280.45	4012.39
1922.72	2737.19	3372.47	4038.43	4246.92	3987.31
1924.72	2751.44	3453.21	4052.4	4217.88	3985.72
1926.72	2757.43	3502.15	4065.78	4189.36	3993.59
1928.71	2755.69	3506.5	4076.86	4160.58	4012.87
1930.71	2759.14	3455.8	4090.66	4134.86	4036.42
1932.71	2757.87	3375.79	4090.61	4109.97	4055.91
1934.71	2747.19	3291.7	4080.75	4098.02	4066.22
1936.71	2738.22	3195.71	4069.26	4096.2	4065.8
1938.71	2727.29	3139.18	4063.32	4112.4	4061.49
1940.71	2718.09	3121.58	4063.29	4163.53	4055.86
1942.7	2697.66	3121.43	4072.9	4225.38	4041.72
1944.7	2665.59	3122.71	4086.55	4292.93	4034.68
1946.7	2630.02	3130.04	4097.9	4377.72	4026.43
1948.7	2599.15	3122.67	4096.34	4478.74	4014.4
1950.7	2589.51	3103.65	4066.62	4581.67	4005.95
1952.7	2580.2	3089	4034.7	4634.47	4001.07
1954.7	2573.84	3081.7	4007.57	4648.41	3997.59
1956.7	2570.85	3079.33	3990.68	4629.3	3996.62
1958.69	2566.82	3082.71	3978.62	4574.53	3996.97
1960.69	2568.32	3088.95	3976.93	4503.55	4002.68
1962.69	2593.98	3096.84	3983.74	4429.58	4010.89
1964.69	2635.82	3092.65	3997.34	4369.54	4012.19
1966.69	2691.32	3080.8	4012.1	4331.47	4012.35
1968.69	2751	3061.27	4042.4	4291.51	4017.47
1970.69	2803.34	3048.8	4082.77	4249.44	4033.36
1972.68	2856.25	3048.97	4119.53	4216.25	4060.97
1974.68	2910.75	3059.29	4153.56	4186.76	4103.53
1976.68	2956.68	3071.03	4175.52	4161.13	4167.92
1978.68	3001.1	3086.77	4175.08	4138.98	4251.88
1980.68	3026.51	3100.64	4159.06	4126.54	4344.76
1982.68	3023.43	3107.92	4139.05	4123.64	4449.23
1984.68	2991.9	3106.8	4110.57	4120.35	4558.17
1986.68	2938.54	3097.23	4080.62	4116.48	4663.16
1988.67	2874.81	3089.01	4051.72	4114	4764.48
1990.67	2818.68	3088.4	4022.64	4096.49	4845.72
1992.67	2774.43	3093.64	3992.64	4068.75	4903.68
1994.67	2738.37	3102.07	3967.41	4043.49	4943.89
1996.67	2721.72	3109.86	3945.69	4031.87	4963.78
1998.67	2719.97	3107.69	3924.44	4027.1	4969.05
2000.67	2712.63	3101.03	3909.17	4015.41	4954.21
2002.66	2720.27	3088.33	3905.28	4001.06	4921.45
2004.66	2736.09	3075.32	3908.59	3983.73	4860.89
2006.66	2746.45	3074.6	3911.98	3965.07	4782.91
2008.66	2741.77	3074.74	3922.11	3955.84	4686.61
2010.66	2729.5	3076.17	3936.24	3947.77	4590.8
2012.66	2704.65	3076.12	3956.06	3946.26	4512.72
2014.66	2679.27	3082.3	3980.51	3961.49	4447.18
2016.66	2663.68	3084.79	4006.96	3979.78	4399.18
2018.65	2651.93	3066.81	4042.33	4004.05	4358.17
2020.65	2638.97	3055.84	4080.31	4024.11	4321.51
2022.65	2621.99	3051.49	4138.11	4035.86	4287.28
2024.65	2612.45	3057.2	4217.25	4048.9	4256.67
2026.65	2594.12	3061.73	4315.83	4063.69	4238.07
2028.65	2575.24	3066.14	4437.49	4085.84	4225.25
2030.65	2564.32	3063.35	4564.19	4114.26	4210.79
2032.64	2556.95	3053.76	4698.09	4143.21	4183.55
2034.64	2550.37	3045.4	4818.29	4167.77	4157.58
2036.64	2540.69	3040.6	4911.8	4180.35	4140.18
2038.64	2537.9	3037.04	4959.22	4183.46	4131.09
2040.64	2536.44	3028.73	4976.45	4187.17	4138.93
2042.64	2540.28	3016.19	4948.8	4190.18	4157.94
2044.64	2555.92	3004.53	4882.79	4194.26	4185.36
2046.64	2571.05	2996.42	4791.41	4195.67	4213.81
2048.63	2585.96	2985.26	4676.4	4199.63	4250.63
2050.63	2602.32	2979.98	4547.54	4205.83	4293.15
2052.63	2634.98	2980.11	4426.16	4206.28	4334.52
2054.63	2661.46	2994.71	4334.86	4215.74	4368.05
2056.63	2678.25	3018.24	4270.07	4240.48	4386.11
2058.63	2676.28	3047.91	4222.85	4246.21	4398.68
2060.63	2649.02	3065.83	4197.75	4232.73	4384.69
2062.62	2617.33	3074.11	4189.27	4194.1	4340.68
2064.62	2590.84	3064.22	4195.99	4140.49	4289.18
2066.62	2573.68	3051.99	4224.37	4081.54	4232.68
2068.62	2562.52	3046.89	4253.05	4034.86	4190.59
2070.62	2553.53	3039.96	4281.83	4023.36	4174.77
2072.62	2555.14	3027.77	4300.55	4016.4	4161.97
2074.62	2568.25	3025.7	4311.68	4025	4153.42
2076.62	2579.4	3024.71	4321.53	4030.66	4151.68
2078.61	2585.64	3015.22	4300.09	4032.12	4153.32
2080.61	2593.92	3001.84	4256.27	4030.89	4159.77
2082.61	2608.71	2987.34	4208.32	4037.51	4164.64
2084.61	2616.42	2974.37	4173.45	4036.3	4164.7
2086.61	2622.89	2957.66	4133.43	4039.02	4170.04
2088.61	2628.93	2933.8	4085.86	4036.55	4182.09
2090.61	2642.13	2914.8	4041.22	4042.41	4203.65
2092.6	2663.14	2909.76	3998.59	4057.39	4236
2094.6	2674.06	2922.06	3962.44	4079.37	4287.02
2096.6	2677.44	2942.81	3932.94	4102.66	4345.04
2098.6	2680.01	2964.17	3917.11	4107.8	4410.98
2100.6	2674.53	2985.05	3921.87	4113.43	4483.37
2102.6	2680.18	3006.01	3930.98	4113.62	4558.4
2104.6	2703.58	3028.26	3935.56	4104.66	4645.59
2106.6	2736.67	3050.35	3950.07	4095.8	4727.48
2108.59	2765.81	3070.04	3968.31	4092.95	4813.46
2110.59	2771.61	3098.1	3985.77	4086.49	4891.65
2112.59	2772.63	3124.07	4007.78	4086.96	4962.06
2114.59	2767.5	3129.51	4030.66	4083.81	5030.2
2116.59	2763.75	3122.23	4048.14	4072.82	5082.42
2118.59	2768.41	3120.94	4064.62	4060.3	5095.1
2120.59	2774.09	3116.25	4079.31	4040.83	5069.71
2122.58	2781.09	3103.56	4098.37	4025.03	5029.58
2124.58	2787.51	3081.75	4097.4	4008.54	4971.79
2126.58	2807.4	3063.57	4086.21	3996.37	4909.57
2128.58	2813.97	3057.42	4081.17	3986.75	4834.59
2130.58	2798.13	3047.62	4082.34	3982.87	4741.89
2132.58	2780.69	3046.19	4085.95	3990.87	4656.04
2134.58	2753.11	3049.59	4095.72	4009.57	4578.4
2136.58	2712.31	3042.64	4106.92	4032.69	4512.87
2138.57	2675.72	3032.5	4103.64	4055.05	4462.35
2140.57	2647.65	3013.64	4091.33	4080.55	4411.46
2142.57	2635.97	3003.63	4074.81	4110.26	4358.34
2144.57	2634.41	2999.11	4062.01	4132.79	4303.48
2146.57	2637.3	3000.05	4054.27	4144.44	4250.09
2148.57	2635.35	2995.97	4047.34	4144.47	4210.04
2150.57	2624.18	2984.99	4040.21	4134.27	4171.91
2152.56	2620.08	2970.73	4041.55	4118.58	4139.78
2154.56	2627.82	2961.37	4040.73	4102.56	4107.58
2156.56	2636.19	2950.78	4035.51	4075.56	4079.19
2158.56	2648.57	2941.43	4040.61	4057.21	4051.85
2160.56	2661.19	2941.02	4051.65	4042.18	4038.74
2162.56	2678.74	2943.13	4061.78	4034.01	4033.91
2164.56	2692.54	2951.08	4063.41	4034.43	4033.83
2166.56	2696.85	2957.59	4059.69	4044.43	4034.61
2168.55	2712.53	2960.61	4051.54	4066.35	4040.6
2170.55	2731.99	2956.5	4043.71	4086.15	4039.95
2172.55	2739.63	2952.11	4029.02	4098.66	4032.91
2174.55	2746.82	2948.77	4018.52	4102.73	4028.38
2176.55	2755.65	2940.24	4019.84	4105.19	4022.44
2178.55	2774.8	2937.89	4021.46	4109.2	4026.69
2180.55	2792.09	2936.69	4027.09	4112.21	4032.66
2182.54	2811.37	2936.83	4037.04	4112.89	4033.26
2184.54	2817.32	2944.59	4058.78	4105.2	4037.02
2186.54	2807.06	2961.96	4096.74	4095.66	4038.74
2188.54	2768.06	2984.78	4142.85	4081.83	4041.46
2190.54	2734.75	3014.34	4200.54	4067.63	4030.73
2192.54	2725.15	3037.53	4257.88	4055.36	4018.96
2194.54	2729.13	3044.7	4303.21	4036.93	4006.36
2196.54	2734.9	3042.37	4301.08	4020.95	3993.93
2198.53	2733.86	3033.41	4279.36	4004.69	3983.14
2200.53	2729.75	3022.98	4251.19	3995.39	3968.45
2202.53	2722.11	3006.83	4220.84	3992.88	3959.26
2204.53	2715.04	3002.82	4194.91	3995.95	3956.25
2206.53	2705.01	3020.39	4176.09	4009.27	3960.97
2208.53	2701	3051.31	4181.59	4034.4	3966.99
2210.53	2698.52	3088.69	4175.07	4067.14	3974.92
2212.52	2696.87	3149.78	4172.14	4102.55	3981.01
2214.52	2688.35	3229.15	4183.59	4137.55	3987.16
2216.52	2674.36	3319.54	4201.58	4156.57	3987.48
2218.52	2663.53	3428.33	4242.05	4162.14	3988.42
2220.52	2644.84	3539.25	4300.78	4148.36	3990.33
2222.52	2628.89	3620.96	4386.73	4129.22	3991.01
2224.52	2609.12	3627.3	4480.75	4100.93	3987.56
2226.52	2596.74	3582.99	4564.17	4073.54	3991.44
2228.51	2588.85	3486.14	4598.2	4052.04	3995.36
2230.51	2586.65	3376.44	4585.03	4035.95	3997.48
2232.51	2579.71	3277.51	4516.27	4039.52	3993.66
2234.51	2577.32	3200.1	4427.31	4062.48	3990.2
2236.51	2573.58	3170.95	4336.1	4099.99	3985.36
2238.51	2570.68	3150.29	4245.71	4158.85	3981.36
2240.51	2570.5	3134.33	4202.11	4232.14	3979.67
2242.5	2587.74	3117.18	4160.65	4307.13	3978.04
2244.5	2606.17	3097.68	4118	4379.87	3982.78
2246.5	2616.21	3084.19	4083.04	4391.91	3995.24
2248.5	2625.53	3063.9	4054.45	4365.53	4007.99
2250.5	2633.16	3041.94	4018.01	4337.4	4019.74
2252.5	2642.52	3018.13	3986.59	4300.51	4027.43
2254.5	2639.05	2995.38	3970.2	4273.46	4036.25
2256.5	2644.6	2982.19	3963.93	4266.16	4043
2258.49	2656.56	2977.12	3971.84	4263.04	4044.59
2260.49	2674.01	2980.05	3989.22	4251.16	4047.66
2262.49	2684.4	2976.41	4011.61	4242.67	4049.16
2264.49	2678.76	2976.62	4040.79	4231.19	4051.49
2266.49	2666.61	2977.67	4071.15	4216.88	4055.4
2268.49	2663.17	2978.34	4107.09	4203.65	4067.95
2270.49	2659.25	2979.02	4139.05	4178.37	4083.45
2272.49	2656.45	2979.45	4158.32	4149.86	4101.48
2274.48	2670.33	2983.38	4161.88	4113.22	4117.75
2276.48	2691.74	2993.14	4159.83	4082.8	4124.12
2278.48	2712.89	2997.63	4156.84	4062.14	4127.81
2280.48	2731.77	2998.78	4153.42	4042.23	4128.94
2282.48	2742.77	3000.2	4153.25	4030.53	4122.97
2284.48	2753.05	3000.22	4155.76	4032.27	4117.86
2286.48	2781.69	3002.52	4167.08	4034.24	4102.86
2288.47	2805.66	3009.68	4189.06	4036.5	4091.43
2290.47	2807.48	3008.92	4202.06	4038.77	4083.17
2292.47	2787.79	3002.89	4203.52	4032.24	4085.45
2294.47	2754.7	3000.65	4190.19	4025.47	4102.94
2296.47	2735.73	3002.39	4153.12	4016.16	4125.69
2298.47	2724.18	3004.77	4115.27	3998.73	4143.9
2300.47	2711.03	3001.63	4072.29	3983.17	4164.72
2302.47	2700.44	2996.66	4038.52	3977.02	4185.08
2304.46	2698.42	2985.83	4012.04	3981.5	4204.85
2306.46	2698.71	2968.45	3990.06	3985.69	4225.85
2308.46	2687.61	2943.77	3966.86	3996.58	4239.68
2310.46	2675.25	2930.93	3954.25	4013.32	4238.25
2312.46	2661.79	2928.57	3947.45	4027.76	4230.07
2314.46	2652.28	2930.81	3933.69	4046.55	4218.69
2316.46	2649.94	2941.36	3924.81	4063.49	4201.31
2318.45	2655.79	2961.6	3922.03	4084.18	4190.28
2320.45	2653.74	2983.42	3923.18	4111.5	4179.75
2322.45	2646.65	3001.58	3934.54	4132.27	4166.26
2324.45	2639.85	3015.57	3945.98	4147.68	4161.59
2326.45	2629.29	3029.62	3953.06	4152.38	4167.11
2328.45	2621.5	3042.1	3960.43	4143.34	4173.53
2330.45	2624.93	3047.65	3972.24	4130.69	4181.05
2332.45	2629.13	3051.04	3987.15	4106.73	4185.05
2334.44	2647.63	3059.5	4005.07	4084.76	4185.53
2336.44	2675.76	3071.76	4014.56	4070.76	4181.39
2338.44	2702.87	3082.5	4020.33	4053.03	4180.8
2340.44	2722.72	3093.11	4026.83	4035.75	4187.74
2342.44	2753.61	3102.5	4033.05	4022.57	4197.63
2344.44	2789.69	3104.58	4037.19	4005.77	4205.84
2346.44	2839.67	3103.83	4049.04	3984.02	4212.33
2348.43	2885.33	3095.74	4070.18	3963.54	4211.53
2350.43	2902.03	3074.67	4082.66	3950.21	4214.77
2352.43	2893.37	3049.31	4099.13	3945.97	4221.93
2354.43	2843.14	3025.36	4123.81	3947.08	4244.8
2356.43	2780.07	3003.79	4148.23	3954.2	4267.08
2358.43	2732.7	2995.86	4169.46	3961.08	4272.19
2360.43	2702.28	2996.39	4183.1	3971.98	4258.88
2362.43	2676.76	2995.18	4175.01	3984.1	4239.24
2364.42	2647.64	2999.01	4152.08	3998.22	4217.98
2366.42	2628.63	3010.82	4126.84	4004.03	4189.57
2368.42	2625.78	3035.69	4106.93	4004.46	4181.14
2370.42	2628.55	3077.05	4094.26	4005.51	4183.7
2372.42	2634.17	3137.13	4085.47	4004.66	4191.27
2374.42	2662.24	3204.26	4086.54	4009.21	4207.53
2376.42	2686.91	3264.49	4099.48	4011.77	4223.87
2378.41	2694.69	3313.38	4105.61	4023.12	4230.1
2380.41	2701.96	3345.56	4106.71	4039.79	4234.46
2382.41	2699.36	3370.05	4102.42	4067.44	4237.99
2384.41	2692.84	3398.95	4098.52	4110.22	4244.39
2386.41	2685.77	3440.92	4100.58	4162.29	4257.13
2388.41	2673.82	3510.07	4105.01	4219.31	4280.18
2390.41	2665.31	3593.53	4112.81	4278.81	4315.5
2392.41	2653.98	3644.68	4128.3	4326.8	4363.12
2394.4	2658.68	3663.27	4142.29	4320.91	4415.24
2396.4	2680.4	3635.68	4147.13	4293.51	4449.55
2398.4	2702.28	3558.2	4147.66	4254.03	4454.03
2400.4	2724.95	3452.74	4155.95	4213.2	4423.38
2402.4	2739.83	3341.42	4166.96	4194.26	4377.89
2404.4	2756.22	3243.78	4164.83	4193.35	4319.26
2406.4	2761.87	3178.6	4155.73	4198.31	4250.57
2408.39	2771.31	3126.42	4130.23	4193.1	4201.92
2410.39	2789.45	3089.84	4098.92	4168.92	4170.09
2412.39	2793.48	3066.92	4075.41	4141.31	4144.81
2414.39	2784.85	3058.36	4065.55	4109.36	4126.09
2416.39	2785.63	3063.93	4063.84	4079.08	4119.94
2418.39	2790.93	3072.47	4063.22	4054.36	4117.73
2420.39	2808.17	3087.14	4054.14	4033.11	4117.65
2422.39	2841.69	3102.57	4043.81	4019.83	4116.02
2424.38	2869.2	3119.22	4036.01	4022.16	4116.34
2426.38	2884.53	3129.11	4037.32	4026.67	4115.42
2428.38	2890.68	3134.36	4033.47	4036.59	4115.09
2430.38	2895	3132.91	4025.52	4056.09	4109.81
2432.38	2878.72	3124.05	4023.79	4067.02	4099.77
2434.38	2831.95	3109.15	4024.54	4061.95	4091.11
2436.38	2785.61	3106.11	4028.91	4058.65	4079.64
2438.37	2773.21	3120.21	4039.01	4057.85	4082.51
2440.37	2789.46	3142.93	4046.96	4061.07	4094.18
2442.37	2813.16	3166	4054.3	4076.83	4100.41
2444.37	2840.27	3182.99	4058.5	4093.14	4102.43
2446.37	2861.97	3189.75	4056.38	4103.82	4106.12
2448.37	2875.34	3184.67	4056.92	4097.53	4105.43
2450.37	2876.6	3161.23	4059.73	4084.22	4103.1
2452.37	2878.2	3128.15	4057.55	4067.42	4095.27
2454.36	2880.91	3105.39	4048.82	4044.88	4083.82
2456.36	2863.54	3092.38	4044.22	4025.15	4072.61
2458.36	2836.28	3076.72	4046.25	4012.74	4057.54
2460.36	2803.94	3063.27	4055.44	4004.17	4049.98
2462.36	2770.75	3049.24	4056.93	3998.3	4058.75
2464.36	2741.82	3038.88	4058.34	4003.08	4075.49
2466.36	2713.66	3034.08	4072.87	4008.83	4096.44
2468.35	2703.96	3046.68	4086.6	4008.5	4120.36
2470.35	2701.21	3063.99	4104.56	4005.03	4145.98
2472.35	2712.14	3083.37	4118.5	3999.34	4175.2
2474.35	2743.59	3107.16	4117.11	3991.06	4200.96
2476.35	2792.6	3117.08	4111.67	3978.66	4221.05
2478.35	2856.53	3122.91	4105.03	3967.92	4233.96
2480.35	2915.98	3123.95	4097.24	3961.7	4243.13
2482.35	2944.19	3113.73	4094.3	3956.09	4246.46
2484.34	2942.99	3092.64	4097.58	3959.72	4240.09
2486.34	2915.86	3071.13	4102.73	3974.63	4214.91
2488.34	2893.37	3052.18	4112.77	3995.4	4176.83
2490.34	2862.26	3034.78	4112.96	4007.76	4128.83
2492.34	2826.01	3040.49	4109.94	4023.94	4081.07
2494.34	2783.38	3057.07	4109.57	4038.28	4047.53
2496.34	2742.36	3086	4110.43	4035.3	4029.67
2498.33	2705.24	3121.06	4116.92	4030.15	4020.93
2500.33	2682.04	3149.92	4132.76	4025.75	4026.53
2502.33	2681.91	3157.57	4153.3	4021.9	4044.91
2504.33	2681.12	3136.13	4179.83	4024.44	4082.68
2506.33	2678.29	3101.63	4219.67	4033.12	4127.13
2508.33	2664.14	3076.29	4260.73	4043.57	4177.41
2510.33	2661.49	3056.05	4298.48	4061.02	4226.61
2512.33	2655.69	3045.66	4338.63	4072.81	4272.83
2514.32	2643.04	3042.1	4364.57	4075.27	4308.77
2516.32	2628.25	3053.2	4358.31	4072.61	4331.83
2518.32	2619.52	3069.45	4335.57	4061.62	4339.17
2520.32	2619.24	3088.22	4310.3	4043.95	4334.74
2522.32	2616.02	3109.77	4289.45	4012.81	4322.67
2524.32	2609.35	3137.59	4281.86	3979.4	4297.6
2526.32	2602.69	3167.57	4266.71	3954.46	4271
2528.31	2596.26	3193.57	4240.64	3946.31	4234.25
2530.31	2596.45	3210.49	4218.29	3938.93	4195.64
2532.31	2611.9	3210.13	4201.37	3944.94	4155.44
2534.31	2650.59	3196.54	4177.32	3955.14	4135.52
2536.31	2696.22	3168.02	4156.04	3976.07	4130.9
2538.31	2744.64	3134.83	4139.61	4008.51	4134.19
2540.31	2785.06	3115.97	4119.11	4043.37	4149.46
2542.31	2811.72	3114.04	4095.7	4075.64	4165.25
2544.3	2816.22	3126.14	4080.91	4107.65	4180.03
2546.3	2794.37	3142.38	4063.16	4140.93	4188.92
2548.3	2768.35	3160.63	4053.83	4185.89	4187.94
2550.3	2745.68	3170.35	4047.67	4232.4	4188.62
2552.3	2729.18	3166.2	4036.73	4276.48	4191.16
2554.3	2721.57	3156.02	4033.68	4309.55	4198.11
2556.3	2724.33	3134.38	4020.75	4332.81	4207.06
2558.29	2727.84	3117.82	4003.41	4338.88	4223.41
2560.29	2734.28	3107.91	3994.82	4329.42	4242.92
2562.29	2740.68	3097.26	3996.58	4304.03	4271.69
2564.29	2747.08	3082.86	3994.92	4270.05	4314.84
2566.29	2741.74	3063.04	3997.83	4233.52	4363.51
2568.29	2730.75	3043.67	3998.89	4189.08	4412.56
2570.29	2724.79	3041.27	4004.6	4144.6	4436.86
2572.29	2715.22	3050.29	4018.82	4107.1	4429.13
2574.28	2723.63	3079.21	4020.47	4077.02	4404.01
2576.28	2737.54	3103.97	4018.32	4052.2	4361.34
2578.28	2756.26	3120.83	4023.5	4029.88	4311.65
2580.28	2773.34	3135.46	4051.17	4025.61	4252.48
2582.28	2782.31	3143.91	4087.05	4029.34	4198.69
2584.28	2769.44	3151.93	4119.19	4034.71	4160.51
2586.28	2748.13	3159.03	4148.47	4047.66	4141.85
2588.27	2733.8	3166.39	4170.42	4058.26	4135.06
2590.27	2724.67	3162.27	4181.9	4062.62	4136.93
2592.27	2720.58	3147.06	4187	4059.33	4150.32
2594.27	2717.62	3125.43	4192.74	4057.38	4171.34
2596.27	2713.53	3102.83	4190.98	4051.89	4193.02
2598.27	2709.12	3079.77	4185.62	4048.09	4217.08
2600.27	2699.08	3059.03	4170.6	4041.01	4254.12
2602.27	2681.42	3045.92	4139	4036.89	4309.47
2604.26	2654.63	3038.77	4108.77	4034.58	4387.42
2606.26	2623.82	3038.35	4080.06	4037.92	4495.19
2608.26	2610.67	3045.84	4062.53	4050.73	4631.88
2610.26	2611.33	3051.98	4055.56	4048.07	4777.78
2612.26	2612.24	3058.15	4065.61	4055.12	4916.54
2614.26	2624.06	3059.04	4084.54	4066.1	5035.64
2616.26	2646.46	3051.97	4113.41	4079.36	5138.02
2618.25	2666.74	3050.5	4154.22	4086.66	5208.79
2620.25	2687.27	3048.11	4202.63	4093.18	5242.97
2622.25	2695.37	3047.84	4249.61	4101.63	5241.7
2624.25	2693.95	3038.69	4296.75	4110.8	5195.22
2626.25	2684.19	3015.52	4347.65	4117.83	5109.18
2628.25	2681.57	3002.25	4402.6	4121.7	4996.89
2630.25	2660.9	3005.63	4468.83	4117.19	4850.11
2632.25	2650.19	3004.91	4520.28	4107.01	4707.26
2634.24	2650.78	2992.16	4530.92	4095.3	4577.37
2636.24	2659.88	2980.85	4507.78	4080.92	4454.79
2638.24	2666.3	2981.71	4436.7	4061.71	4357.28
2640.24	2668.58	2985.28	4349.22	4051.63	4285.92
2642.24	2662.25	2996.21	4265.49	4039.41	4235.06
2644.24	2661.53	3019.86	4218.73	4026.12	4191.93
2646.24	2666.18	3043.32	4227.79	4019.5	4155.51
2648.23	2682.11	3053.23	4254.94	4013	4121.38
2650.23	2686.13	3055.34	4286.68	4009.6	4089.76
2652.23	2694.56	3057.94	4323.67	4002.48	4055.11
2654.23	2694.66	3052.63	4372.46	3994.39	4020.32
2656.23	2678.86	3052.89	4439.94	3985.38	3988.78
2658.23	2649.59	3052.98	4513.48	3975.49	3958.31
2660.23	2632.99	3052.96	4533.52	3963.5	3931.63
2662.23	2625.69	3057.97	4491.58	3959.3	3907.01
2664.22	2636.56	3067.62	4423.27	3967.96	3883.38
2666.22	2649.15	3078.23	4341.5	3990.18	3862.6
2668.22	2684.63	3083.84	4259.3	4016.75	3844.52
2670.22	2728.25	3080.34	4194.26	4041.31	3838.74
2672.22	2764.67	3071	4163.66	4067.43	3847.97
2674.22	2793.45	3052.18	4129.11	4087.58	3868.25
2676.22	2812.88	3022.72	4090.05	4102.47	3895.17
2678.21	2826.41	3003.28	4046.28	4094.62	3918.16
2680.21	2838.49	3000.55	4010.83	4084.36	3945.72
2682.21	2816.53	3006.78	3987.47	4074.64	3971.1
2684.21	2774.94	3005.2	3978.21	4060.06	3989.31
2686.21	2735.04	3006.23	3961.96	4044.1	4003.47
2688.21	2715.49	3017.59	3952.54	4025.31	4020.53
2690.21	2711.06	3034.48	3946.99	4005.22	4037.43
2692.21	2701.32	3057.13	3943.42	3987.39	4056.34
2694.2	2683.33	3085.27	3941.43	3969.56	4073.73
2696.2	2662.14	3116.79	3938.36	3958.69	4087.64
2698.2	2646.26	3136.01	3930.41	3946.23	4097.03
2700.2	2630.65	3152	3920.57	3934.88	4104.64
2702.2	2621.55	3166.01	3909.72	3931.3	4108.88
2704.2	2614.19	3170.46	3904.78	3935.06	4107.84
2706.2	2611.63	3159.34	3901.51	3929.43	4100.66
2708.19	2623.52	3144.11	3897.26	3922.78	4093.23
2710.19	2636.39	3137.4	3897.34	3912.25	4078.72
2712.19	2662.07	3131.04	3909.66	3902.58	4061.14
2714.19	2706.96	3123.46	3928.97	3895.5	4041.99
2716.19	2770.75	3114.37	3952.66	3888.82	4015.45
2718.19	2839.46	3101.14	3987.27	3890.11	3989.11
2720.19	2908.19	3081.13	4023.04	3897.49	3962.54
2722.19	2966.93	3058.23	4053.69	3894.36	3942.65
2724.18	3000.69	3035.33	4076.18	3893.21	3924.98
2726.18	3011.16	3014.69	4096.21	3899.3	3913.37
2728.18	2984.83	2995.88	4101.58	3911.59	3913.42
2730.18	2924.69	2986.82	4101.19	3934.39	3939.51
2732.18	2856.06	2987.64	4087.06	3964.78	3988.05
2734.18	2790.36	2986.31	4063.96	4002.92	4064.01
2736.18	2731.03	2981.16	4042.25	4044.74	4161.69
2738.17	2699.06	2970.3	4019.77	4084.61	4271.45
2740.17	2686.05	2959.25	4009.11	4113.14	4360.27
2742.17	2675.83	2958.62	4013.43	4141.58	4415.24
2744.17	2670.45	2966.31	4033.95	4167.11	4423.13
2746.17	2672.28	2981	4052.67	4182.24	4405.53
2748.17	2681.86	2995.64	4075.69	4180.16	4357.24
2750.17	2695.22	3016.66	4095.07	4174.64	4304.92
2752.17	2719.02	3044.76	4109.33	4166.85	4232.23
2754.16	2744.08	3069.34	4124.16	4159.4	4174.55
2756.16	2772.43	3102.73	4139.58	4149.31	4146.44
2758.16	2813.45	3142.06	4148.91	4145.62	4114.13
2760.16	2854.62	3198.63	4148.89	4164.47	4083.76
2762.16	2879.93	3269.81	4145.7	4183.66	4053.04
2764.16	2895.03	3353.71	4137.6	4197.11	4030.63
2766.16	2915.96	3421.42	4129.65	4206.48	4016.19
2768.15	2961.14	3460.46	4129.39	4205.2	4005.78
2770.15	3005.66	3465.73	4130.65	4199.68	3995.26
2772.15	3027.3	3426.44	4128.16	4185.69	3992.94
2774.15	3025.1	3364.1	4124.93	4165.11	3996.13
2776.15	3001.56	3300.7	4126.68	4146.96	4006.14
2778.15	2933.63	3249.83	4136.26	4142.77	4021.52
2780.15	2849.7	3223.81	4148.51	4133.18	4035.05
2782.15	2784.31	3228.54	4154.16	4127.67	4046.62
2784.14	2744.82	3246.36	4146.61	4131.64	4044.16
2786.14	2739.07	3265.28	4132.64	4128.21	4021.23
2788.14	2730.64	3276.42	4121.15	4115.38	3998.05
2790.14	2711.62	3273.25	4112.06	4091.82	3974.19
2792.14	2702.77	3264.88	4107.11	4063.52	3954.07
2794.14	2694.37	3247.84	4100.95	4032.98	3940.56
2796.14	2686.93	3224.98	4095.99	4012.69	3930.32
2798.13	2674.48	3209.25	4090.59	4012.16	3926.96
2800.13	2663.66	3185.2	4095.31	4023.66	3923.49
2802.13	2654.49	3157.23	4107	4043.9	3922.29
2804.13	2636.43	3131.05	4113.81	4059.6	3924.31
2806.13	2620.16	3116.46	4119.88	4076.89	3930.24
2808.13	2604.26	3105.25	4126.61	4093.22	3938.75
2810.13	2592.76	3092.98	4118.62	4098.6	3946.4
2812.13	2580.93	3096.97	4100.94	4096.17	3960.75
2814.12	2574.52	3093.56	4084.06	4094.81	3983.64
2816.12	2581.61	3087.71	4071.56	4091.84	4013.78
2818.12	2592.76	3083.36	4058.1	4094.71	4050.51
2820.12	2615.82	3071.36	4050	4101.11	4095.57
2822.12	2647.73	3060.11	4054.57	4116.36	4146.65
2824.12	2681.03	3042.88	4063.65	4141.73	4200.77
2826.12	2708.65	3025.46	4080.08	4164.72	4258.64
2828.11	2729.34	3005.6	4092.25	4188.32	4319.73
2830.11	2731.64	2989.04	4100.81	4205.6	4360.88
2832.11	2722.99	2990.53	4108.02	4210.55	4373.23
2834.11	2698.76	3000.41	4116.47	4211.54	4358.03
2836.11	2664.39	2999.34	4125.63	4202.56	4328.72
2838.11	2621.42	2992.6	4130.27	4183.07	4288.84
2840.11	2585.05	2995.67	4133.33	4161.48	4236.17
2842.11	2567.91	3007.47	4135.5	4141.03	4201.66
2844.1	2563.43	3021.89	4146.23	4126.59	4205.32
2846.1	2560.68	3033.04	4159.94	4109.27	4211.53
2848.1	2557.17	3045.3	4170.5	4096.73	4205.39
2850.1	2565.65	3058.46	4175.74	4083.02	4203.81
2852.1	2585.31	3073.76	4174.42	4070.79	4200.85
2854.1	2605.61	3092.87	4166.52	4062.69	4199.77
2856.1	2630.41	3110.66	4152.63	4055.42	4191.65
2858.09	2655.91	3108.11	4140.33	4049.63	4181.14
2860.09	2673.53	3093.24	4137.27	4044.39	4160.62
2862.09	2698.09	3078.84	4137.45	4041.22	4138.65
2864.09	2717.07	3066.35	4137.21	4034.54	4118.03
2866.09	2725.21	3060.08	4129.13	4032.7	4107.6
2868.09	2726.83	3061.09	4118.5	4037.36	4116.16
2870.09	2723.75	3071.84	4105.9	4039.56	4154.49
2872.09	2715.65	3082.49	4094.15	4035.24	4226.04
2874.08	2717.57	3090.85	4087.94	4028.67	4345.18
2876.08	2723.86	3096.13	4082.62	4023.94	4517.2
2878.08	2746.86	3094.34	4074.25	4015.15	4720.69
2880.08	2793.1	3089.41	4073.28	4004.58	4897.11
2882.08	2856.01	3082.06	4071.58	3991.88	4972.13
2884.08	2938.91	3075.61	4067.52	3980.68	4999.34
2886.08	3041.56	3061.74	4061.14	3974.16	4987.6
2888.07	3175.5	3050.34	4062.72	3969.95	4934.09
2890.07	3317.5	3046.53	4070.81	3977.56	4843.65
2892.07	3406.52	3041.42	4086.94	3989.69	4712.15
2894.07	3466.27	3032.35	4099.81	4006.34	4559.22
2896.07	3491.66	3027.06	4112.88	4025.04	4408.33
2898.07	3489.84	3033.03	4128.83	4041.08	4281.45
2900.07	3430.35	3042.11	4146.04	4038.11	4210.58
2902.07	3320.74	3048.83	4157.25	4031.84	4157.53
2904.06	3194.22	3049.86	4146.43	4030.76	4111.54
2906.06	3065.1	3043.86	4130.6	4033.42	4072.17
2908.06	2944.43	3041.06	4125.96	4033.66	4047.43
2910.06	2872.32	3041.37	4125.13	4029.73	4032.54
2912.06	2802.5	3047.43	4125.77	4024.44	4020.14
2914.06	2737.49	3055.46	4129.15	4019.4	4007.74
2916.06	2691.24	3057.6	4140.82	4024.55	3996.11
2918.05	2658.66	3063.23	4155.59	4035.36	3987.29
2920.05	2651.83	3058.47	4168.29	4050.06	3976.13
2922.05	2650.33	3051.02	4183.11	4058.1	3960.39
2924.05	2652.11	3057.21	4187.43	4063.15	3946.72
2926.05	2660.44	3063.11	4189.76	4073.63	3939.57
2928.05	2666.61	3061.84	4182.34	4081.65	3934.46
2930.05	2678.13	3052.22	4171.92	4083.31	3930.43
2932.05	2677.63	3050.52	4169.87	4087.68	3931.36
2934.04	2676.55	3048.11	4174.48	4094.02	3932.29
2936.04	2663.89	3040.38	4185.33	4100.34	3943.6
2938.04	2656.49	3025.64	4194.64	4110.46	3958.06
2940.04	2647.9	3004.8	4199.49	4120.52	3976.94
2942.04	2634.63	2977.71	4201.62	4126.9	3992.19
2944.04	2614.98	2950.83	4208.58	4115.44	3984.45
2946.04	2594.2	2935.23	4229.18	4108.79	3961.83
2948.03	2575.79	2931.02	4256.1	4089.94	3939.49
2950.03	2562.53	2926.94	4295.42	4066.65	3923.01
2952.03	2557.32	2923.69	4363.12	4042.1	3915.12
2954.03	2559.05	2931.64	4455.72	4018.12	3905.69
2956.03	2566.54	2944.7	4565.47	3996.31	3896.46
2958.03	2581.5	2952.08	4687.69	3979.61	3889.89
2960.03	2599.01	2957.33	4791.17	3966.24	3884.24
2962.03	2618.3	2971.91	4844.95	3951.88	3886.56
2964.02	2635.5	2989.96	4808.39	3943.56	3893.24
2966.02	2647.68	3012.46	4743.38	3940.13	3900.29
2968.02	2658.11	3034.04	4649.7	3933.75	3909.52
2970.02	2651.06	3054.65	4543.31	3916.59	3907.9
2972.02	2626.8	3080.29	4442.64	3895.61	3907.78
2974.02	2601.13	3117.39	4369.08	3877.28	3909.35
2976.02	2589.89	3142.81	4310.35	3863.98	3907.42
2978.01	2586	3153.48	4259.93	3865.12	3906.83
2980.01	2594.51	3154.92	4225.34	3892.01	3912.39
2982.01	2607.23	3147.87	4199.94	3931.96	3937.11
2984.01	2613.87	3126.07	4174.45	3989.85	3981.57
2986.01	2610.41	3104.3	4147.85	4058.1	4039.4
2988.01	2612.69	3095.13	4119.08	4121.17	4101.2
2990.01	2622.75	3087.66	4090.57	4189.69	4162.74
2992.01	2639.51	3087.59	4062.54	4247.63	4176.34
2994	2655.91	3095.6	4039.95	4275.45	4142.42
2996	2665.67	3099.75	4024.72	4278.94	4100.71
2998	2669.95	3100.13	4015.53	4278.72	4049.55
3000	2672.47	3092.61	4020.28	4269.66	4015.39
3002	2666.23	3085.84	4034.95	4253.52	3980.01
3004	2663.08	3080.52	4042.23	4226.32	3967.4
3006	2674.66	3073.25	4049.31	4209.12	3959.32
3007.99	2678.08	3071.35	4056.98	4198.63	3958.13
3009.99	2673.47	3073.12	4054.17	4193.89	3952.16
3011.99	2652.16	3077.42	4046.96	4188.92	3953.41
3013.99	2623.94	3084.52	4027.93	4185.95	3958.17
3015.99	2597.41	3096.64	4002.08	4190.7	3965
3017.99	2575.84	3091.21	3977.16	4190.73	3976.08
3019.99	2568.74	3060.92	3955.26	4174.55	3987.24
3021.99	2582.35	3022.28	3940.43	4146.68	3986.26
3023.98	2615.21	2995.61	3934.08	4118.23	3976.26
3025.98	2634.79	2983.46	3942.02	4098.05	3964.28
3027.98	2649.68	2972.49	3958.71	4077.87	3947.19
3029.98	2660.05	2965.1	3980.88	4060.5	3936.22
3031.98	2673.38	2964.11	4006.3	4046.95	3923.78
3033.98	2681.74	2963.34	4034.95	4029.33	3912.53
3035.98	2682.86	2946.13	4059.16	4016.18	3904.86
3037.97	2666.25	2924.88	4073.3	4005.88	3891.86
3039.97	2638.83	2918.96	4086.04	4014.89	3875.57
3041.97	2613.44	2916.7	4095.69	4039.78	3857.54
3043.97	2588.88	2912.89	4102.96	4070.74	3841.62
3045.97	2570.76	2916.31	4108.57	4107.4	3843.31
3047.97	2566.16	2932.41	4106.95	4145.14	3854.47
3049.97	2568.67	2954.23	4112.05	4183.61	3860.92
3051.97	2577.63	2975.18	4122.47	4219.06	3870.62
3053.96	2600.6	2990.74	4127.89	4244.15	3883.97
3055.96	2622.95	3015.37	4138.33	4256.64	3893.22
3057.96	2651.48	3028.87	4152.6	4251.13	3896.31
3059.96	2685.33	3033.33	4162.77	4234.96	3885.29
3061.96	2712.26	3044.22	4166.89	4208.78	3866.43
3063.96	2735.68	3057.28	4167.14	4181.3	3843.22
3065.96	2753.46	3065.77	4161.92	4155.09	3812.56
3067.95	2748.9	3062.38	4147.82	4126.15	3787.29
3069.95	2734.55	3044.23	4127.28	4104.89	3774.08
3071.95	2724	3023.18	4103.72	4081.01	3761.83
3073.95	2715.19	3005.9	4082.5	4056.85	3752.35
3075.95	2711.27	2995.69	4070.27	4033.18	3743.79
3077.95	2696.16	3005.05	4070.25	4015.07	3740.33
3079.95	2673.69	3024.7	4076.73	4007.73	3733.39
3081.95	2659.77	3045.38	4081.68	4002.75	3734.26
3083.94	2656.16	3076.3	4089.26	4008.31	3732.89
3085.94	2669.61	3105.7	4097.99	4010.37	3738.91
3087.94	2688	3115.91	4097.73	4006.22	3747.04
3089.94	2713.02	3106.91	4089.33	3998.3	3756.22
3091.94	2737.33	3086.25	4076.56	3998.86	3760.35
3093.94	2745.72	3064.37	4067.56	4014.09	3767.09
3095.94	2732.15	3038.57	4064.54	4033.13	3776.03
3097.93	2703.06	3016.36	4067.14	4057.78	3782.74
3099.93	2689.29	3014.37	4072.09	4085.12	3792.41
3101.93	2680.3	3023.72	4078.66	4116.38	3809.01
3103.93	2671.71	3029.94	4085.6	4139.75	3832.07
3105.93	2665.18	3038.82	4097.56	4152.42	3863.89
3107.93	2666.31	3045.91	4112.93	4151.05	3902.33
3109.93	2677.01	3049.23	4125.23	4136.26	3944.31
3111.93	2687.28	3045.91	4136.86	4113.76	3976.41
3113.92	2694.14	3038.71	4149.94	4085.59	3993.28
3115.92	2691.42	3028.55	4168.09	4056	3996.46
3117.92	2678.19	3021.03	4197.01	4033.41	3992.21
3119.92	2670.25	3005.12	4221.71	4025.43	3987.64
3121.92	2661.27	2986.91	4239.35	4029.12	3974.38
3123.92	2654.02	2969.67	4247.54	4048.93	3964.39
3125.92	2651.25	2951.44	4253.32	4078.4	3951.7
3127.91	2640.7	2935.91	4257.5	4123.52	3934.65
3129.91	2616.65	2932.12	4262.23	4179.32	3910.61
3131.91	2600.58	2944.61	4264.86	4247.41	3887.52
3133.91	2592.89	2962.88	4260.46	4325.13	3861.82
3135.91	2590.28	2982.2	4258.3	4396.54	3831.01
3137.91	2594.21	2993.97	4245.11	4460.88	3807.75
3139.91	2596.26	2997.95	4236.03	4480.29	3788.48
3141.91	2589.81	3000.8	4238.37	4474.22	3775.73
3143.9	2574.65	3008.92	4245.38	4437.44	3771.56
3145.9	2563.83	3021.89	4250.4	4380.25	3781.03
3147.9	2560.08	3009.62	4260.74	4305.56	3802.52
3149.9	2563.82	2984.57	4271.23	4234.78	3823.27
3151.9	2568.99	2972.65	4270.23	4199.58	3836.07
3153.9	2575.19	2958.14	4249.79	4189.54	3846.26
3155.9	2580.67	2941.4	4216.84	4179.16	3854.12
3157.89	2585.26	2929.77	4184.84	4173.32	3864.87
3159.89	2584.15	2919.2	4159.79	4172.29	3867.27
3161.89	2583.53	2919.11	4146.45	4176	3873.23
3163.89	2579.98	2924.62	4139.5	4172.78	3876.33
3165.89	2568.23	2927.13	4134.91	4158.51	3874.42
3167.89	2563.88	2925.38	4126.92	4142.56	3868.45
3169.89	2554.59	2928.15	4127.74	4124.34	3859.23
3171.89	2551.71	2942.72	4134.29	4109.26	3847.35
3173.88	2564.83	2962.96	4145.05	4098.26	3838.17
3175.88	2586.36	2983.24	4158.8	4093.56	3836.19
3177.88	2623.51	2996.98	4182.82	4096.22	3837.66
3179.88	2662.25	3010.66	4216.35	4094.56	3839.77
3181.88	2696.55	3022.7	4255.59	4088.71	3838.16
3183.88	2707.88	3031.53	4297.66	4091.83	3829.58
3185.88	2711.29	3041.23	4331.39	4090.95	3822.64
3187.87	2697.98	3047.85	4346.37	4082.3	3814.02
3189.87	2680.68	3046.73	4343.24	4065.41	3817.88
3191.87	2674.49	3033.69	4321.97	4048.19	3827.21
3193.87	2681.6	3029.76	4288.45	4034.45	3841.02
3195.87	2688.77	3038.49	4253.49	4035.22	3860.03
3197.87	2682.98	3048.71	4224.05	4035.78	3883.02
3199.87	2676.98	3061.32	4217.7	4038.8	3903.18
3201.87	2658.92	3073.59	4206.58	4043.78	3921.87
3203.86	2624.86	3076.06	4199.23	4046.64	3936.1
3205.86	2592.56	3081.03	4198.04	4046.65	3940.77
3207.86	2556.11	3079.75	4192.55	4043.36	3945.19
3209.86	2524.38	3079.21	4169.18	4042.63	3953.68
3211.86	2502.43	3078.67	4139.34	4044.54	3963.83
3213.86	2497.28	3070.37	4117.03	4049.13	3970.14
3215.86	2506.42	3054.18	4102.17	4063.93	3976.8
3217.85	2522.7	3027.2	4094.97	4081.03	3985.47
3219.85	2529.76	2995.82	4092.28	4103.66	3991.03
3221.85	2547.68	2969.14	4083.26	4125.83	3987.7
3223.85	2560.25	2956.25	4073.33	4155.18	3979.27
3225.85	2569.88	2941.1	4067.02	4184.85	3968.07
3227.85	2584.73	2930.03	4069.46	4218.76	3955.96
3229.85	2601.94	2937.14	4078.38	4248.46	3951.18
3231.85	2614.71	2943.59	4096.09	4257.65	3944.73
3233.84	2626.25	2939	4118.75	4246.43	3935.74
3235.84	2625.18	2926.74	4140.99	4205.95	3930.03
3237.84	2609.31	2923.54	4139.96	4163.56	3919.72
3239.84	2596.29	2925.95	4137.27	4131.21	3914.98
3241.84	2578.33	2928.95	4144.92	4107.25	3910.7
3243.84	2568.42	2937.27	4147.85	4077.15	3907.23
3245.84	2565.27	2951.26	4143.91	4054.94	3909.21
3247.83	2565.22	2969.67	4147.43	4037.18	3922.37
3249.83	2556.09	2986.12	4154.15	4024.99	3950.54
3251.83	2544.37	3003.13	4155.56	4022.12	3981.44
3253.83	2531.43	3025.44	4144.65	4033.64	4013.02
3255.83	2512.62	3047.39	4129.4	4052.11	4040.82
3257.83	2495.85	3063.03	4120.23	4071.18	4056.53
3259.83	2487.44	3066.64	4112.9	4092.37	4068.82
3261.83	2483.08	3061.65	4096.54	4116.5	4070.62
3263.82	2484.87	3058.16	4078.16	4149.3	4052.32
3265.82	2490.96	3041.89	4068.21	4180.5	4028.42
3267.82	2498.72	3017.93	4073.36	4221.84	3998.45
3269.82	2503.79	2990.03	4082.02	4272.92	3965.71
3271.82	2524.49	2962.7	4087.09	4335.38	3941.45
3273.82	2546.24	2952.7	4094.77	4408.78	3924.84
3275.82	2568.42	2939.2	4110.43	4485.79	3909.25
3277.81	2586.09	2928.64	4134.1	4575	3903.16
3279.81	2598.94	2924.12	4163.62	4670.29	3896.94
3281.81	2612.28	2923.9	4185.18	4753.34	3892.29
3283.81	2623.52	2917.01	4213.04	4768.6	3888.07
3285.81	2637.11	2903.93	4235.92	4741.32	3885.26
3287.81	2659.04	2881.55	4255.93	4685.65	3879.8
3289.81	2689.21	2867.61	4265.81	4604.37	3878.89
3291.81	2714.21	2874.64	4268.21	4501.44	3881.77
3293.8	2729.73	2890.75	4278.05	4405.85	3886.65
3295.8	2734.89	2907.24	4290.16	4356	3901.05
3297.8	2720.92	2930.6	4296.17	4322.92	3909.44
3299.8	2695.06	2954.35	4292.96	4291.9	3911.43
3301.8	2670.11	2971.04	4286.47	4274.75	3909.97
3303.8	2650.87	2985.05	4270.57	4263.34	3900.58
3305.8	2634.3	3004.22	4244.35	4253.19	3886.01
3307.79	2622.31	3016.21	4215.92	4238.32	3869.92
3309.79	2615.61	3029.15	4194.12	4217.49	3851.12
3311.79	2607.05	3045.45	4180.95	4194.32	3850.81
3313.79	2588	3057.31	4173.59	4171.06	3860.46
3315.79	2558.79	3063.11	4157.5	4161.73	3874.3
3317.79	2530.9	3045.39	4135.36	4164.82	3891.7
3319.79	2513.82	3013.5	4120.47	4173.6	3906.3
3321.79	2507.49	2984.78	4102.42	4191.63	3923.09
3323.78	2514.79	2962.42	4082.51	4216.77	3933.47
3325.78	2531.89	2947.87	4070.72	4255.67	3938.04
3327.78	2545.02	2951.92	4069.12	4310.2	3935.64
3329.78	2552.67	2972.38	4067.38	4375.68	3923.13
3331.78	2548.04	3007.81	4069.11	4453.54	3908.58
3333.78	2538.52	3062.72	4080.38	4536.19	3888.44
3335.78	2541.59	3133.84	4090.03	4568.44	3866.19
3337.77	2544.96	3227.87	4104.1	4563.72	3851.46
3339.77	2554.56	3339.49	4105.54	4530.33	3843.95
3341.77	2561.85	3443.33	4102.57	4479.58	3853.6
3343.77	2572.26	3520.43	4099.95	4411.28	3872.4
3345.77	2583.31	3557.34	4098.38	4339.37	3897.66
3347.77	2592.97	3542.9	4101.77	4294.91	3928.83
3349.77	2593.42	3498.73	4106.65	4276.25	3964.66
3351.77	2579	3440.07	4121.75	4262.35	4000.58
3353.76	2559.94	3386.79	4157.69	4260.99	4014.22
3355.76	2550.29	3336.2	4214.32	4262.52	4005.88
3357.76	2552.71	3327.28	4262.97	4251.74	3997.38
3359.76	2563.49	3311.18	4305.33	4243.21	3987.67
3361.76	2577.72	3281.6	4344.03	4230.5	3990.44
3363.76	2588.49	3237.95	4376.66	4209.26	3990.76
3365.76	2598	3191.39	4390.09	4179.73	3989.02
3367.75	2595.55	3151.11	4377.12	4146.34	3987.49
3369.75	2590.86	3121.59	4349.18	4109.21	3988.94
3371.75	2587.5	3099.62	4316.96	4084.67	4003.28
3373.75	2583.84	3075.19	4285.62	4080.13	4028.02
3375.75	2587.95	3063.31	4259.74	4088.68	4059.57
3377.75	2591.82	3045.24	4244.39	4108.99	4073.87
3379.75	2591.03	3023.85	4234.64	4154.64	4077.77
3381.75	2581.74	2991.62	4223.78	4222.27	4072.49
3383.74	2573.4	2961.61	4201.68	4307.49	4060.27
3385.74	2570.2	2939.1	4172.59	4397.48	4039.1
3387.74	2574.42	2925.96	4134.48	4453.81	4018.57
3389.74	2588.1	2923.23	4101.75	4453.69	3992.75
3391.74	2610.55	2922.32	4074.65	4423.04	3963.24
3393.74	2621.38	2935.36	4058.61	4359.71	3934.75
3395.74	2615.61	2955.41	4057.2	4288.8	3923.46
3397.73	2607.64	2970.44	4065.18	4225.02	3915.57
3399.73	2601.37	2974.71	4073.68	4176.87	3908.06
3401.73	2594.73	2970.3	4077.15	4164.58	3904.47
3403.73	2599.76	2958.78	4083.62	4159.65	3897.17
3405.73	2615.16	2948.69	4101.35	4164.45	3889.17
3407.73	2620.7	2939.06	4132.07	4169.43	3885.22
3409.73	2618.01	2920.08	4145.24	4174.38	3879.02
3411.73	2613.28	2908.46	4161.07	4179.82	3881.54
3413.72	2603.68	2900.51	4186.21	4173.97	3886.75
3415.72	2605.78	2899.29	4215.1	4165.4	3896.62
3417.72	2604.72	2898.29	4234.72	4150.05	3904.42
3419.72	2601.08	2910.27	4251.45	4132.99	3904.19
3421.72	2584.89	2925.77	4260.84	4115.6	3911.49
3423.72	2573.84	2940.83	4259.8	4102.23	3918.56
3425.72	2563.76	2954.69	4252.13	4099.68	3925.37
3427.71	2556.02	2952.95	4249.29	4094.74	3924.33
3429.71	2560.32	2931.75	4244.73	4095.28	3920.93
3431.71	2566.33	2904.04	4245.51	4105.68	3916.44
3433.71	2579.61	2882.16	4248.38	4120.94	3909.04
3435.71	2590.59	2857.69	4250.74	4140.18	3900.93
3437.71	2597.81	2848.63	4248.01	4153.19	3892.26
3439.71	2597.4	2861.14	4251.09	4169.48	3881.75
3441.71	2590.05	2882.39	4256.65	4184.35	3869.79
3443.7	2589.37	2898.41	4252.84	4188.92	3857.47
3445.7	2589.79	2907.57	4243.04	4188.72	3848.39
3447.7	2592.66	2916.39	4225.33	4194.22	3839
3449.7	2599.43	2929.21	4208.22	4193.98	3831.05
3451.7	2605.56	2949.74	4195.93	4196.84	3823.97
3453.7	2605.79	2970.93	4180.63	4204.49	3819.06
3455.7	2597.48	2996.06	4172.56	4209.9	3817.45
3457.69	2595.31	3021.74	4175.12	4211.41	3820.59
3459.69	2599.91	3056.59	4183.07	4215.47	3825.67
3461.69	2614.56	3091.65	4186.36	4228.3	3837.94
3463.69	2630.57	3119.41	4192.33	4255.8	3844.8
3465.69	2651.98	3127.99	4195.28	4289.39	3845.73
3467.69	2668.82	3114.66	4190.1	4310.35	3847.23
3469.69	2674.21	3084.86	4164.73	4325.61	3847.38
3471.69	2669.42	3059.62	4138.96	4329.14	3851.73
3473.68	2652.25	3052.39	4119.65	4317.62	3854.73
3475.68	2630.37	3054.51	4103.76	4306.67	3865.67
3477.68	2610.58	3043.7	4097.58	4298.95	3882.6
3479.68	2597.77	3024.16	4098.36	4288.82	3897.47
3481.68	2588.27	3010.57	4105.93	4290.95	3913.73
3483.68	2572.97	3000.59	4117.94	4314.03	3931.84
3485.68	2552.35	2983.06	4126.04	4320.21	3948.48
3487.67	2552.21	2962.02	4131.71	4307.8	3960.03
3489.67	2562.58	2935.84	4134.9	4278.27	3964.7
3491.67	2575.45	2903.29	4145.2	4253.22	3972.99
3493.67	2582.38	2873.22	4155.67	4224.84	3980.39
3495.67	2586.86	2859.5	4168.88	4198.9	3989.32
3497.67	2592.29	2847.2	4183.21	4172.54	4000.91
3499.67	2590.45	2842.33	4192.8	4141.01	4019.28
3501.67	2580.51	2842.79	4197.68	4108.98	4040.89
3503.66	2575.05	2838.82	4199.92	4096.09	4062.26
3505.66	2574.04	2829.8	4214.11	4084.74	4083.63
3507.66	2573.32	2822.55	4244.02	4060.73	4093.53
3509.66	2563.23	2818.41	4285.13	4036.95	4095.8
3511.66	2546.27	2819.84	4333.1	4009.42	4096.05
3513.66	2528.69	2823	4387.78	3985.52	4090.03
3515.66	2514.6	2833.08	4450.42	3972.29	4079.75
3517.65	2512.85	2844.27	4491.38	3976.71	4062.68
3519.65	2514.13	2856.43	4506.13	3985.98	4039.55
3521.65	2519.25	2869.75	4476.41	4004.47	4010.11
3523.65	2523.61	2880.88	4422.1	4035.71	3975.98
3525.65	2518.89	2894.23	4366.2	4058.94	3944.06
3527.65	2513.46	2898.67	4317.3	4070.02	3915.52
3529.65	2505.43	2892.25	4287.66	4061.28	3909.02
3531.65	2503.09	2887.25	4270.57	4036.14	3919.87
3533.64	2508.82	2894.47	4263.35	4012.02	3943.55
3535.64	2518.12	2893.99	4261.67	3998.78	3978.19
3537.64	2533.07	2885.11	4254	3987.93	4030.76
3539.64	2540.17	2877.28	4240.92	3974.57	4087.81
3541.64	2537.31	2877.44	4234.44	3964.28	4135.35
3543.64	2524.28	2881.12	4239.1	3958.14	4153.75
3545.64	2515.9	2882.1	4248.84	3954.28	4140.57
3547.63	2509.59	2889.76	4261.1	3954.41	4116.82
3549.63	2498.38	2907.11	4268.84	3961.19	4083.45
3551.63	2482.99	2930.51	4268.92	3976.02	4043.15
3553.63	2462.49	2948.65	4266.08	3993.2	4004.08
3555.63	2457.32	2947.4	4271.86	4023.09	3978.45
3557.63	2461.79	2934.35	4278.3	4055.8	3951.26
3559.63	2460.18	2922.64	4271.6	4089.85	3929.7
3561.63	2457.77	2918.01	4255.87	4124.7	3908.43
3563.62	2473.02	2914.04	4238.9	4162.33	3888.02
3565.62	2493.43	2901.88	4227.63	4194.36	3874.24
3567.62	2516.95	2893	4222.67	4215.63	3863.47
3569.62	2546.65	2886.44	4216.39	4232.12	3855.25
3571.62	2580.23	2890.96	4211.33	4244.46	3858.88
3573.62	2603.06	2898.89	4190.32	4255.57	3862.2
3575.62	2622.8	2918.71	4157.95	4253.95	3857.79
3577.61	2645.91	2944.57	4132.97	4250.3	3851.59
3579.61	2664.41	2972.26	4120.98	4248.12	3845.64
3581.61	2679.78	2991.24	4127.26	4238.06	3840.92
3583.61	2681.69	3011.87	4151.42	4224.32	3837.26
3585.61	2675.33	3031.01	4189.91	4206.75	3847.22
3587.61	2661.36	3045.5	4219.33	4194	3858.42
3589.61	2648.5	3049.57	4241.15	4181.59	3866.95
3591.61	2635.93	3048.7	4261.98	4172.32	3876.59
3593.6	2615.73	3048.54	4274.16	4165.11	3889.93
3595.6	2591.39	3038.87	4260	4161.43	3908.72
3597.6	2557.34	3017.07	4237.38	4165.4	3936.69
3599.6	2523.12	2987.32	4215.47	4188.41	3965.29
3601.6	2503.67	2954.45	4202.04	4226.8	3984.12
3603.6	2496.1	2930.57	4203.19	4283.66	4002.16
3605.6	2492.59	2910.23	4222.56	4358.35	4009.7
3607.59	2491.65	2892.88	4245.67	4437.08	4005.93
3609.59	2482.59	2877.77	4276.68	4495.37	3997.61
3611.59	2483.34	2869.34	4315.96	4525.67	3982.76
3613.59	2495.59	2868.91	4372.65	4534.96	3964.92
3615.59	2511.15	2865.69	4444.62	4520.1	3941.41
3617.59	2525.12	2860.47	4510.13	4485.71	3913.34
3619.59	2540.19	2862.97	4579.59	4432.43	3881.66
3621.59	2547.47	2867.15	4621.11	4371.72	3857.09
3623.58	2545.26	2877.31	4633.19	4310.1	3835.5
3625.58	2537.06	2885.71	4601.32	4266.81	3820.59
3627.58	2510.39	2887.96	4522.52	4235.09	3814.69
3629.58	2481.26	2896.21	4428.87	4214.95	3819.72
3631.58	2465.32	2906.77	4325.47	4199.96	3825.69
3633.58	2452.43	2915.62	4253.72	4191.71	3827.46
3635.58	2443.25	2921.99	4228.91	4187.87	3840.91
3637.57	2429.74	2925	4202.73	4181.46	3856.81
3639.57	2402.51	2922.77	4177.96	4180.05	3876.35
3641.57	2373.64	2923.9	4157.94	4185.25	3890.98
3643.57	2350.48	2930.5	4147.77	4192.26	3900.32
3645.57	2341.52	2936.89	4137.73	4188.31	3907.18
3647.57	2331.36	2939.48	4128.39	4180.62	3901.57
3649.57	2327.35	2939.9	4126.7	4173.45	3888.18
3651.57	2328.94	2941.43	4111.97	4169.47	3870.69
3653.56	2336.31	2944.29	4095.19	4164.59	3847.12
3655.56	2341.25	2937.92	4088.66	4162.54	3830.3
3657.56	2347.1	2918.05	4090.09	4154.91	3824.67
3659.56	2352.75	2892.94	4098.91	4146.96	3822.8
3661.56	2360.31	2874.47	4123.01	4142.02	3827.61
3663.56	2369.69	2861.84	4150.91	4152.26	3842.61
3665.56	2387.97	2867.97	4181.69	4168.76	3864.05
3667.55	2413.07	2888.91	4203.16	4186.84	3892.37
3669.55	2446.5	2912.33	4221.32	4206.5	3920.14
3671.55	2469.47	2945.58	4228.41	4219.19	3944.47
3673.55	2491.99	2989.07	4224.22	4222.65	3966.23
3675.55	2516.07	3044.97	4214.7	4214.58	3975.48
3677.55	2535.28	3103.15	4204.2	4201.04	3969.8
3679.55	2549.55	3172.93	4206.62	4176.75	3954.79
3681.55	2574.66	3228.65	4228.74	4150.88	3940.07
3683.54	2600.53	3281.94	4267.41	4117.21	3923.59
3685.54	2618.16	3335.65	4311.58	4094.63	3909.94
3687.54	2633.58	3340.5	4358.72	4082.62	3911.29
3689.54	2637.45	3310.46	4387.23	4079	3914.94
3691.54	2633.28	3246.82	4383.07	4071.51	3916.95
3693.54	2623.95	3166.91	4346.87	4066.2	3914.01
3695.54	2610.07	3105.71	4296.75	4061.02	3913.23
3697.53	2593.99	3072.3	4245.85	4056.86	3914.21
3699.53	2584.56	3071.73	4210.25	4058.49	3908
3701.53	2587.04	3071.19	4186.69	4065.74	3895.07
3703.53	2596.76	3074.61	4189.15	4089.79	3882.85
3705.53	2614.02	3086.78	4191.48	4134.49	3874.17
3707.53	2633.7	3095.32	4190.34	4188	3868.33
3709.53	2658.13	3101.87	4182.22	4244.75	3866.92
3711.53	2676.73	3102.31	4176.2	4297.77	3866.45
3713.52	2679.6	3087.97	4164.18	4343.58	3870.68
3715.52	2685.2	3054.73	4148.42	4370.93	3877.46
3717.52	2679.26	3017.18	4140.74	4385.27	3886.06
3719.52	2657.28	2993.21	4136.18	4403.37	3896.48
3721.52	2622.86	2971.71	4135.17	4420.71	3903.68
3723.52	2607.96	2953.37	4138.27	4425.11	3909.83
3725.52	2605.1	2938.45	4138.82	4413.67	3908.24
3727.51	2607.94	2933.29	4139.01	4396.74	3903.3
3729.51	2606.51	2928.61	4133.35	4376.48	3898.12
3731.51	2603.51	2931.54	4124.03	4364.21	3889.97
3733.51	2590.28	2940.73	4127.27	4375.9	3888.36
3735.51	2574.97	2948.77	4150.99	4407.82	3883.09
3737.51	2559.39	2950.74	4189.77	4454.28	3877.9
3739.51	2536.79	2959.49	4239.39	4514.3	3876
3741.51	2523.38	2978.16	4294.98	4576.89	3874.79
3743.5	2510.25	2995.45	4356.7	4620.43	3873.34
3745.5	2504.63	3010.61	4415.08	4624.18	3870.94
3747.5	2502.64	3014.23	4453.35	4591.19	3869.55
3749.5	2502.57	3003.96	4484.59	4514.11	3867.02
3751.5	2516.26	2987.76	4510.86	4418.45	3863.02
3753.5	2523.69	2977.09	4500.51	4319.98	3859.17
3755.5	2528.47	2968.53	4466.77	4232.84	3854.94
3757.5	2534.31	2961.6	4418.39	4177.85	3855.12
3759.49	2525.87	2960.21	4367.45	4147.23	3860.37
3761.49	2515.87	2953.63	4329.6	4117.85	3872.72
3763.49	2501.1	2944.88	4317.99	4099.01	3893.3
3765.49	2478.39	2935.2	4320.14	4085.59	3917.87
3767.49	2456.62	2914.48	4317.21	4068.57	3941.58
3769.49	2441.46	2903.62	4303.11	4045.48	3952.19
3771.49	2428.21	2916.15	4285.18	4027.62	3955.03
3773.48	2419.56	2924.77	4273.24	4015.35	3961.24
3775.48	2410.55	2932.94	4262.21	4005.25	3961.9
3777.48	2405.46	2933.01	4249.16	3992.6	3959.37
3779.48	2399.48	2931.59	4244.7	3982.7	3952.02
3781.48	2404.9	2930.96	4250.62	3972.74	3944.14
3783.48	2420.35	2925.91	4260.76	3971.48	3938.41
3785.48	2439.19	2924.86	4262.22	3974.78	3933.68
3787.48	2455.84	2920.64	4255.46	3980.65	3935.05
3789.47	2464.88	2916.61	4244.48	3987.2	3933.3
3791.47	2477.43	2918.06	4228.68	3994.73	3933.68
3793.47	2493.54	2916	4217.18	3997.52	3933.92
3795.47	2507.34	2913.38	4210.72	4001.76	3933.51
3797.47	2520.56	2906.29	4210.84	4009.27	3926.95
3799.47	2535.29	2894.45	4225.38	4014.73	3916.42
3801.47	2541.89	2878.96	4245.75	4026.66	3911.38
3803.46	2545.08	2875.97	4264.97	4035.96	3915.71
3805.46	2548.08	2868.03	4279.62	4042.49	3922.53
3807.46	2546.38	2859.61	4285.8	4046.6	3930.44
3809.46	2543.64	2853.56	4276.59	4043.12	3935.92
3811.46	2534.31	2857.93	4261.96	4036.33	3931.8
3813.46	2526.75	2860.93	4254.48	4022.6	3929.42
3815.46	2513.31	2860.54	4252.19	4009.31	3923.39
3817.46	2505.75	2858.87	4253.86	4001.16	3915.4
3819.45	2501.81	2862.55	4257.16	3997.17	3904.19
3821.45	2506.88	2874.58	4269.61	4004.03	3892.11
3823.45	2525.45	2890.29	4281.61	4014.77	3880.61
3825.45	2531.03	2914.18	4289.95	4032.04	3869.17
3827.45	2537.16	2933.15	4297.19	4053.43	3861.61
3829.45	2548.32	2938.49	4315.82	4073.81	3859.42
3831.45	2570.63	2950.95	4345.8	4090.73	3858.06
3833.44	2604.92	2970.77	4377.26	4104.42	3857.03
3835.44	2642.28	2999.59	4401.45	4116.02	3857.72
3837.44	2664.24	3051.97	4409.91	4121.94	3859.49
3839.44	2672.43	3131.98	4398.55	4117.2	3855.99
3841.44	2655.19	3225.58	4369.9	4113.07	3848.47
3843.44	2603.05	3305.81	4337.5	4103.99	3833.5
3845.44	2555.24	3360.22	4312.87	4099.34	3816.65
3847.44	2536.69	3368.88	4307.29	4110.42	3802.16
3849.43	2540.36	3339.35	4301.11	4130.85	3795.13
3851.43	2545.66	3285.24	4296.77	4146.64	3788.78
3853.43	2544.55	3229.04	4291.46	4158.31	3788.08
3855.43	2535.46	3166.48	4274.84	4155.87	3790.26
3857.43	2530.19	3114.08	4250.18	4141.26	3795.24
3859.43	2520.41	3070.46	4227.16	4126.53	3805.23
3861.43	2510.97	3024.08	4205.88	4107.13	3817.2
3863.42	2504.36	2992.21	4181.2	4087.49	3823.72
3865.42	2495.9	2965.33	4159.63	4069.05	3823.06
3867.42	2481	2950.27	4133.3	4061.48	3817.71
3869.42	2459.92	2952.85	4113.79	4064.61	3811.89
3871.42	2447.27	2941.84	4104.12	4078.69	3801.88
3873.42	2445.08	2928.16	4095.65	4089.64	3791.97
3875.42	2445.63	2930.85	4092.55	4096.55	3784.34
3877.42	2452.64	2944.4	4096.42	4091.15	3776.26
3879.41	2466.47	2955.78	4111.86	4088.12	3771.03
3881.41	2498.94	2974.45	4126.4	4091.38	3770.32
3883.41	2526.23	2994.36	4126.59	4096.6	3775.19
3885.41	2535.99	3010.88	4124.39	4098.28	3792.5
3887.41	2530.69	3022.46	4121.84	4101.23	3820.27
3889.41	2514.61	3019.83	4107.51	4106.31	3855.24
3891.41	2499.64	3018.56	4086.48	4114.01	3891.06
3893.4	2484.86	3020.06	4067.49	4125.35	3919.74
3895.4	2478.58	3007.3	4049.65	4143.7	3942.16
3897.4	2471.03	2989.11	4044.63	4165.42	3960.44
3899.4	2470.35	2974.35	4053.7	4189.68	3969.51
3901.4	2472.55	2968.09	4071.11	4219.35	3966.36
3903.4	2476.08	2963.02	4096.1	4267.42	3950.7
3905.4	2481.81	2964.83	4124.94	4337.56	3931.82
3907.4	2488.3	2963.47	4146.01	4424.5	3915.32
3909.39	2488.48	2971.4	4146.25	4521.68	3908.48
3911.39	2481.84	3003.23	4151.98	4621.46	3910.98
3913.39	2478.89	3043.06	4150.55	4731.94	3921.09
3915.39	2476.36	3066.07	4147.18	4848.72	3931.06
3917.39	2473.19	3083.26	4143.56	4912.27	3935
3919.39	2462.68	3086.58	4157.24	4918.14	3929.95
3921.39	2450.12	3084.25	4170.08	4872.29	3915.03
3923.38	2433.51	3074.64	4182.38	4778.1	3893.94
3925.38	2405.18	3062.42	4188.97	4662.83	3866.69
3927.38	2383.58	3057.89	4186.31	4540.41	3836.66
3929.38	2378.84	3050.29	4177.89	4418.42	3800.42
3931.38	2389.8	3026.86	4166.38	4336.46	3775.98
3933.38	2413.41	3000.95	4151.99	4303.03	3761.06
3935.38	2444.76	2987.8	4145.13	4271.5	3747.25
3937.38	2476.22	2979.44	4148.12	4240.35	3741.19
3939.37	2509.3	2977.24	4153.78	4210.92	3739.72
3941.37	2541.45	2982.07	4155.16	4180.98	3739.91
3943.37	2568.9	2988.14	4146.18	4153.05	3742.05
3945.37	2575.91	2982.9	4137.81	4126.73	3747.92
3947.37	2570.77	2968.2	4132.64	4099.45	3754.15
3949.37	2571.12	2947.18	4128.05	4079.14	3763.76
3951.37	2578.6	2929.72	4123.77	4064.01	3778.62
3953.36	2587.68	2916.85	4129.98	4049.54	3793.1
3955.36	2585.13	2909.17	4145.82	4032.85	3809.23
3957.36	2579.58	2913.85	4162.25	4020.1	3818.54
3959.36	2568.31	2926.22	4182.05	4012.88	3817.74
3961.36	2549.02	2933.04	4200.33	4013.25	3817.79
3963.36	2531.44	2942.29	4206.11	4020.03	3821.19
3965.36	2510.05	2947.14	4209.99	4031.72	3832.94
3967.36	2490.55	2944.27	4218.83	4042.82	3836.7
3969.35	2469.05	2931.51	4231.68	4049.03	3841.14
3971.35	2454.29	2908.24	4238.07	4051.96	3850.76
3973.35	2449.3	2881.62	4233.71	4060.9	3857.96
3975.35	2455.14	2863.97	4219.24	4069.86	3878.5
3977.35	2460.47	2861.02	4198.73	4078.39	3892.55
3979.35	2467.7	2870.69	4175.48	4091.67	3906.91
3981.35	2479.4	2882.24	4157.31	4108.08	3914.9
3983.34	2493.37	2893.46	4136.33	4121.37	3911.94
3985.34	2499.51	2901.21	4122.55	4130.57	3906.26
3987.34	2499.58	2903.87	4112.66	4137.33	3898.73
3989.34	2502.4	2899.36	4104.92	4145.86	3890.03
[truncated: 1,004 more rows]
