# Supplementary material for: Ionogel thin films as a compatibilizing pretreatment for electrospray deposition
Source: Royal Society of Chemistry journal article supplement (doi:10.1039/d5lp00359h), 2026-01-01
Supplement: d5lp00359h1.zip [file B data - aligned.xlsx]

## Sheet: Sheet1
Lateral	Height Data	Height Data	Height Data	Height Data	Height Data	Mean	Standard Deviation
µm	nm	nm	nm	nm	nm	nm	nm
correct	D1	D2	D3	D4	D5	Statistics On Rows of B"Height Data":F"Height Data"	Statistics On Rows of B"Height Data":F"Height Data"
0	0	0	150.518	102.491	132.576	77.1171	72.4593
1.99867	20.394	20.9171	152.512	122.08	167.726	96.7257	71.3608
3.99734	45.0519	37.2856	144.986	137.559	188.125	110.602	66.3153
5.996	72.5593	63.0137	117.683	149.467	201.952	120.935	57.1916
7.99467	88.4126	69.8858	97.97	154.763	222.695	126.745	62.2933
9.99334	86.0347	84.1977	92.9	152.127	230.392	129.13	63.1893
11.992	74.6664	106.306	93.9234	118.642	219.872	122.682	56.7072
13.9907	69.7622	151.616	105.81	78.2401	203.22	121.73	55.6311
15.9893	67.3409	195.839	110.748	59.1658	215.249	129.668	72.3117
17.988	74.8799	218.08	116.563	65.2812	243.233	143.607	82.2514
19.9867	105.719	245.521	105.817	85.0329	250.858	158.59	82.2517
21.9853	155.949	256.552	108.253	88.8859	248.062	171.541	77.7218
23.984	201.495	232.489	122.771	78.2933	231.215	173.252	69.3394
25.9827	228.14	193.869	151.282	69.6683	187.714	166.135	60.4275
27.9813	249.398	152.59	183.956	70.3475	155.081	162.274	64.5303
29.98	252.996	105.103	217.374	79.1961	144.44	159.822	73.6969
31.9787	236.022	88.0058	252.742	102.404	138.635	163.562	76.279
33.9773	186.107	88.3994	265.639	102.582	138.46	156.237	71.8642
35.976	135.08	100.19	280.574	94.9698	120.774	146.317	76.7592
37.9747	117.756	123.504	295.208	101.786	103.59	148.369	82.6018
39.9734	120.789	146.76	298.214	101.94	92.5884	152.058	84.2849
41.972	137.149	160.88	304.479	101.472	96.417	160.079	84.9493
43.9707	135.587	156.797	298.762	116.951	109.599	163.539	77.7688
45.9694	123.517	145.625	306.593	141.919	130.619	169.655	77.0574
47.968	126.929	106.106	287.559	160.477	158.609	167.936	70.6345
49.9667	128.085	71.4269	258.802	170.81	187.623	163.349	69.7306
51.9654	126.738	65.5409	250.161	203.792	210.63	171.373	74.1494
53.964	106.221	77.1528	248.38	245.293	220.699	179.549	81.5711
55.9627	58.168	92.7885	230.182	265.249	210.02	171.281	90.4926
57.9614	6.52016	111.839	202.898	277.855	211.45	162.112	105.155
59.96	-36.8284	123.563	191.492	281.913	217.062	155.44	121.527
61.9587	-67.7625	141.64	186.782	255.182	212.053	145.579	126.154
63.9574	-86.815	159.422	194.486	229.34	227.054	144.698	132.515
65.956	-98.8813	169.816	183.807	217.611	226.671	139.805	135.469
67.9547	-97.5269	188.287	181.99	190.548	212.615	135.183	130.6
69.9534	-72.4277	204.193	182.994	179.535	195.809	138.021	118.06
71.952	-30.7201	204.125	172.94	177.612	188.157	142.423	97.5279
73.9507	13.1356	197.584	176.299	174.486	170.351	146.371	75.2256
75.9494	61.9235	194.658	175.59	179.739	144.278	151.238	53.1887
77.948	109.354	185.406	193.533	179.451	126.355	158.82	38.2044
79.9467	135.011	152.565	210.574	174.563	135.368	161.616	31.7933
81.9454	142.712	99.691	219.928	185.261	149.078	159.334	45.5046
83.944	132.304	70.9523	237.851	199.799	164.508	161.083	63.9447
85.9427	126.811	60.5305	261.916	214.831	169.923	166.802	77.8718
87.9414	128.822	75.2805	284.674	222.36	174.837	177.195	81.1229
89.94	111.79	106.992	297.134	242.828	177.456	187.24	82.7572
91.9387	82.1141	137.925	301.535	254.02	172.387	189.596	88.3165
93.9374	47.4177	166.867	279.542	264.066	152.939	182.166	94.121
95.936	10.1572	185.746	251.843	271.981	124.501	168.845	106.018
97.9347	-17.478	206.192	256.333	260.507	107.84	162.679	118.003
99.9334	-16.1561	215.048	273.73	226.2	101.326	160.03	117.069
101.932	-7.5177	204.605	296.506	196.131	119.711	161.887	113.574
103.931	0	181.083	320.581	184.789	152.43	167.777	114.237
105.929	-5.28443	174.664	334.893	193.648	186.762	176.937	120.971
107.928	-12.5741	178.12	343.506	211.913	215.6	187.313	128.297
109.927	-10.7775	207.75	332.627	225.026	228.561	196.637	125.959
111.925	-15.0568	219.704	299.003	238.091	230.594	194.467	121.113
113.924	-24.6052	219.188	276.873	259.907	242.862	194.845	124.517
115.923	-15.0616	207.259	289.195	273.151	248.651	200.639	124.475
117.921	19.7519	210.049	322.622	285.807	260.821	219.81	119.086
119.92	65.3678	220.715	345.492	291.143	257.239	235.991	105.865
121.919	127.626	244.793	351.035	281.762	251.54	251.351	80.9517
123.917	206.82	257.099	357.38	273.229	259.244	270.754	54.5816
125.916	309.182	253.314	345.394	274.677	254.072	287.328	39.5988
127.915	369.885	237.157	341.193	271.887	251.842	294.393	58.0569
129.913	395.437	224.293	337.081	263.204	251.449	294.293	70.2906
131.912	412.289	211.918	318.392	254.049	238.951	287.12	80.1789
133.911	422.633	193.281	313.422	246.468	231.669	281.495	90.0423
135.909	397.162	168	310.243	215.971	220.759	262.427	91.1738
137.908	347.533	153.994	290.015	185.817	189.007	233.273	81.8105
139.907	313.661	147.979	280.938	176.862	142.785	212.445	79.389
141.905	296.973	153.114	300.652	183.346	95.0631	205.83	90.6257
143.904	298.809	148.201	320.899	198.767	76.5429	208.644	102.387
145.903	304.026	159.862	337.366	227.155	77.121	221.106	105.961
147.901	299.392	178.641	351.425	259.783	85.7495	234.998	104.603
149.9	286.279	184.663	356.207	284.402	102.69	242.848	99.3644
151.899	246.48	193.411	372.135	306.164	126.602	248.958	95.5348
153.897	195.206	195.175	373.281	315.554	152.947	246.433	93.3536
155.896	149.068	182.871	373.175	302.329	167.428	234.974	97.8433
157.895	124.484	172.977	380.348	290.376	184.905	230.618	103.28
159.893	123.443	174.354	406.885	257.598	202.163	232.888	108.667
161.892	143.714	205.004	414.735	224.467	214.789	240.542	102.352
163.891	167.993	252.386	403.966	221.69	214.268	252.06	90.1295
165.889	176.033	290.853	364.408	228.803	199.414	251.902	76.1898
167.888	188.277	317.344	310.601	240.31	181.775	247.661	64.6888
169.887	189.643	326.751	276.566	256.416	167.301	243.335	64.9956
171.885	208.668	317.936	250.528	276.015	170.101	244.65	57.5357
173.884	247.857	279.776	256.217	284.529	174.099	248.496	44.3615
175.883	278.893	239.809	258.466	286.703	178.6	248.494	43.1393
177.881	310.398	211.048	265.152	298.648	180.314	253.112	56.0561
179.88	328.359	180.382	267.125	308.012	174.092	251.594	71.405
181.879	341.812	165.33	273.429	313.381	153.995	249.59	85.7037
183.877	342.002	157.591	283.293	309.278	121.947	242.822	97.1674
185.876	312.307	168.317	299.667	327.921	101.703	241.983	100.95
187.875	253.034	201.075	307.859	361.781	81.6357	241.077	107.464
189.873	203.422	250.606	309.43	388.833	76.7051	245.799	117.174
191.872	164.67	295.899	286.719	400.111	76.0624	244.692	125.88
193.871	136.267	347.997	254.612	407.706	79.0468	245.126	138.327
195.869	118.875	394.838	243.314	386.25	81.6708	244.99	145.765
197.868	101.813	419.264	249.968	351.632	82.7308	241.082	148.762
199.867	92.517	431.732	276.896	340.23	87.5003	245.775	152.487
201.865	99.8967	420.375	307.499	343.647	108.055	255.895	144.576
203.864	123.59	384.464	317.553	348.882	135.7	262.038	123.229
205.863	144.728	354.882	324.743	367.243	152.959	268.911	110.729
207.861	183.27	334.794	339.987	390.764	166.855	283.134	101.216
209.86	221.33	335.656	356.506	406.2	183.015	300.541	94.3607
211.859	243.224	338.813	373.777	400.967	189.67	309.29	89.5943
213.857	256.471	344.919	378.093	383.79	190.442	310.743	84.3473
215.856	273.463	381.686	398.541	356.235	209.53	323.891	79.9695
217.855	286.16	426.632	407.718	341.931	208.173	334.123	89.7204
219.853	310.623	473.126	400.267	358.964	187.699	346.136	106.753
221.852	336.325	528.685	397.423	398.689	183.511	368.926	125.162
223.851	332.885	560.302	365.453	435.772	185.517	375.986	137.653
225.849	322.48	555.328	319.166	460.153	168.746	365.175	148.073
227.848	319.639	524.751	291.389	484.444	165.839	357.212	147.161
229.847	308.629	472.965	283.304	489.8	166.707	344.281	136.251
231.845	320.529	424.558	267.493	474.799	160.457	329.567	125.149
233.844	323.223	372.293	259.786	473.766	172.368	320.287	113.808
235.843	331.675	342.945	259.68	489.924	183.572	321.559	113.772
237.841	329.044	307.982	249.136	494.186	179.148	311.899	117.367
239.84	302.696	266.489	239.043	485.744	173.51	293.496	117.404
241.839	273.086	252.624	256.859	453.644	190.414	285.325	99.2076
243.837	268.884	240.058	287.829	395.101	218.146	282.004	68.6191
245.836	280.213	235.844	319.146	352.049	238.212	285.093	50.7194
247.835	294.137	229.153	338.449	330.553	247.782	288.015	48.6672
249.833	316.377	238.15	371.384	334.179	247.506	301.519	57.231
251.832	301.536	242.8	425.739	349.907	234.79	310.954	79.4161
253.831	280.48	252.792	468.58	369.995	212.43	316.855	102.684
255.829	246.411	269.701	509.386	385.064	209.353	323.983	122.688
257.828	217.688	278.945	560.288	408.726	195.394	332.208	152.107
259.827	194.03	265.619	594.406	436.164	170.078	332.059	179.839
261.825	192.945	232.754	628.527	465.073	168.52	337.564	200.869
263.824	206.666	209.633	646.148	521.503	171.503	351.091	217.497
265.823	229.147	206.485	643.274	592.001	175.172	369.216	228.306
267.821	261.871	213.766	651.539	658.012	171.549	391.347	242.601
269.82	305.544	225.996	701.208	724.133	169.098	425.196	266.988
271.819	327.781	252.275	763.835	779.678	197.009	464.116	284.702
273.817	339.934	279.138	824.072	844.546	230.061	503.55	304.524
275.816	334.738	308.579	874.035	921.278	259.329	539.592	328.411
277.815	322.701	339.311	918.081	991.816	281.737	570.729	352.334
279.813	322.896	367.645	962.62	1055.66	291.142	599.993	375.928
281.812	318.559	379.553	994.142	1124.51	286.734	620.699	404.43
283.811	327.529	367.657	1026.53	1183.93	301.212	641.373	427.74
285.809	321.483	356.012	1070.35	1227.97	338.647	662.891	447.548
287.808	317.267	333.008	1124.62	1267.87	376.621	683.876	470.961
289.807	332.224	320.322	1175.7	1320.16	419.717	713.626	491.919
291.805	355.358	304.555	1231.24	1362.83	466.255	744.048	510.306
293.804	401.748	276.866	1275.94	1384.46	500.418	767.888	520.813
295.803	454.353	264.949	1324.98	1397.61	554.721	799.323	524.083
297.801	500.517	274.125	1387.43	1417.24	629.057	841.674	527.454
299.8	529.876	306.434	1441.48	1455.81	699.445	886.611	531.689
301.799	559.46	350.236	1511.15	1468.38	775.249	932.896	530.312
303.797	590.024	405.018	1582.34	1481.79	845.013	980.835	528.086
305.796	629.875	461.641	1641.2	1501.24	905.333	1027.86	523.04
307.795	667.169	515.288	1682.64	1517.05	965.39	1069.51	513.834
309.793	711.067	552.656	1725.59	1565.98	1004.94	1112.05	516.639
311.792	747.861	597.454	1765.13	1630.47	1051.39	1158.46	520.965
313.791	777.765	662.008	1793.32	1690.51	1107.95	1206.31	516.87
315.789	799.97	740.217	1820.86	1750.24	1153.81	1253.02	511.795
317.788	839.978	822.835	1841.59	1798.66	1206.16	1301.84	497.511
319.787	904.379	904.558	1860.64	1854.01	1259.2	1356.56	479.53
321.785	993.261	998.162	1868.68	1919.91	1288.59	1413.72	455.07
323.784	1092.84	1081.58	1901.3	1977.24	1326.65	1475.92	434.974
325.783	1218.42	1140.39	1951.49	2052.15	1386.97	1549.88	423.571
327.781	1337.71	1179.89	2009.83	2138.15	1432.48	1619.61	426.907
329.78	1396.96	1211.68	2054.94	2215.85	1463.78	1668.64	439.673
331.779	1443.53	1214.06	2106.23	2295.1	1510.63	1713.91	462.592
333.777	1479.55	1194.32	2178.45	2353.33	1545.78	1750.29	492.75
335.776	1504.73	1190.53	2250.03	2399.76	1589.92	1786.99	515.794
337.775	1498.95	1213.31	2314.78	2429.81	1640.02	1819.37	529.202
339.773	1472.29	1253.35	2374.13	2447.25	1692.08	1847.82	537.349
341.772	1466.82	1299.22	2420.16	2434.81	1767.68	1877.74	529.197
343.771	1486.08	1346.36	2458.9	2428.1	1844.71	1912.83	517.528
345.769	1512.62	1402.63	2490.44	2447.74	1921.12	1954.91	507.801
347.768	1557.73	1467.81	2540.45	2494.46	1982.33	2008.56	503.825
349.767	1616.74	1533.66	2597.06	2542.78	2039.73	2065.99	498.812
351.765	1672.56	1606.76	2659.07	2590.28	2106.11	2126.96	493.793
353.764	1720.16	1682.82	2718.43	2626.56	2172.01	2184	486.814
355.763	1774.81	1764.66	2785.87	2665.48	2220.78	2242.32	480.026
357.761	1830.86	1860.29	2853.87	2698.94	2268.56	2302.51	469.126
359.76	1890.91	1968.89	2921.61	2718.37	2298.29	2359.61	452.95
361.759	1955.54	2085.32	2994.65	2745.45	2340.45	2424.28	438.781
363.757	2020.89	2182.14	3053.99	2763.49	2392.73	2482.65	423.354
365.756	2088.13	2279.63	3104.46	2804.22	2429.26	2541.14	410.082
367.755	2155.52	2347.16	3145.59	2860.33	2450.22	2591.76	402.81
369.753	2246.43	2388.43	3169.42	2907.94	2463.65	2635.17	387.701
371.752	2360.52	2404.09	3203.19	2949.64	2470.49	2677.59	376.992
373.751	2483.56	2403.08	3227.61	2975.48	2488.8	2715.7	364.911
375.75	2630.31	2412.7	3235.14	2980.49	2521.72	2756.07	342.241
377.748	2807.29	2417.66	3226.28	2986.12	2554.79	2798.43	325.08
379.747	2987.33	2409.66	3218.16	2972.22	2588.53	2835.18	328.064
381.746	3123.47	2421.42	3233.35	2964.97	2615.78	2871.8	343.19
383.744	3220.8	2454.6	3268.87	2971.08	2640.43	2911.16	356.78
385.743	3290.27	2487.33	3307.64	2962.13	2670.99	2943.67	365.908
387.742	3347.16	2533.37	3330.02	2971.81	2691.04	2974.68	367.5
389.74	3381.27	2590.59	3358.15	3012.33	2704.59	3009.38	363.397
391.739	3392.44	2650.85	3382.5	3057.47	2716.36	3039.93	352.847
393.738	3370.56	2703.66	3395.29	3093.6	2701.45	3052.91	341.057
395.736	3343.86	2759.89	3395.62	3121.08	2680.1	3060.11	328.382
397.735	3325.35	2804.62	3359.47	3148.49	2673.25	3062.24	309.308
399.734	3321.79	2851.02	3308.11	3181.45	2671.47	3066.77	291.224
401.732	3384.29	2888.2	3281.99	3196.87	2676.83	3085.64	294.202
403.731	3451.04	2908.3	3262.99	3194.55	2683.42	3100.06	303.735
405.73	3465.1	2913.16	3229.45	3162.22	2682.58	3090.5	301.091
407.728	3437.05	2933.79	3203.32	3128.52	2703.09	3081.16	277.706
409.727	3391.47	2955.43	3196.07	3117.47	2730.57	3078.2	249.745
411.726	3329.21	2972.77	3197.5	3124.8	2746.85	3074.23	223.741
413.724	3281.93	2984.22	3199.93	3139.2	2767.97	3074.65	203.134
415.723	3271.92	2994.09	3186.1	3160	2823.08	3087.04	178.63
417.722	3287.73	3001.14	3157.71	3182.43	2890.35	3103.87	157.336
419.72	3301.95	3019.89	3144.42	3218.06	2945.66	3125.99	144.528
421.719	3325.32	3048.73	3163.22	3263.23	2991.12	3158.32	140.43
423.718	3348.58	3080.48	3197.3	3290.07	3025.74	3188.44	136.18
425.716	3373.06	3112.61	3228.05	3310.93	3049.51	3214.83	134.373
427.715	3402.39	3143.94	3253.26	3305.97	3043.57	3229.82	139.816
429.714	3450.72	3165.08	3284.33	3272.74	3040.33	3242.64	152.386
431.712	3513.39	3185.8	3307.8	3244.21	3065.57	3263.35	165.824
433.711	3587.87	3191.83	3309.33	3211.71	3094.12	3278.97	188.828
435.71	3660.74	3183.28	3306.57	3193.5	3113.86	3291.59	217.624
437.708	3710.02	3158.14	3322.4	3191.87	3105.17	3297.52	244.114
439.707	3724.79	3144.32	3332.39	3211.28	3080.84	3298.72	255.747
441.706	3708.84	3134.52	3320.05	3247.08	3056.78	3293.46	253.317
443.704	3676.56	3129.8	3302.46	3291.89	3030.27	3286.19	246.293
445.703	3640.24	3129.34	3303.82	3330.96	3010.6	3282.99	238.834
447.702	3584.37	3141.44	3293.54	3373.82	2970.17	3272.67	232.676
449.7	3544.75	3172.33	3287.83	3409.73	2926.74	3268.28	235.946
451.699	3532.82	3199.01	3286.47	3469.52	2895.4	3276.64	252.141
453.698	3500.42	3235.23	3304.31	3540.03	2882.64	3292.52	262.636
455.696	3459.27	3276	3321.59	3591.06	2880.54	3305.69	267.818
457.695	3433.35	3301.96	3333.05	3618.54	2874.29	3312.24	274.235
459.694	3411.9	3329.78	3322.12	3615.04	2877.35	3311.24	269.793
461.692	3376.73	3352.07	3287.11	3583.1	2877.53	3295.31	258.493
463.691	3337.38	3351.05	3262.7	3531.21	2864.47	3269.36	246.902
465.69	3318.97	3345.92	3250.56	3481.53	2867.39	3252.87	231.253
467.688	3317.17	3344.42	3250.03	3437.92	2896.89	3249.28	208.223
469.687	3311.3	3335.27	3256.11	3412.28	2929.11	3248.81	187.328
471.686	3294.53	3322.16	3290.22	3406.64	2965.19	3255.75	169.037
473.684	3296.44	3297.12	3320.26	3410.76	2984.72	3261.86	161.885
475.683	3334.37	3280.15	3346.52	3432.87	2989.81	3276.74	169.491
477.682	3390.86	3257.72	3364.3	3450.78	2998.01	3292.33	178.756
479.68	3476.9	3258.62	3398.32	3489.27	3010.7	3326.76	199.127
481.679	3565.54	3275.52	3432.89	3573.37	3016.06	3372.68	233.299
483.678	3662.09	3306.13	3451	3705.1	3011.3	3427.12	283.109
485.676	3714.21	3368.15	3468.12	3887.28	3025.01	3492.56	331.515
487.675	3755.94	3434	3482.83	4123.99	3047.98	3568.95	400.023
489.674	3783.18	3523.22	3504.12	4418.78	3059	3657.66	498.773
491.672	3795.55	3611.28	3522.42	4803.49	3053.95	3757.34	645.593
493.671	3786.33	3673.77	3529.99	5173.82	3043.8	3841.54	796.811
495.67	3750.18	3725	3519.45	5472.3	3045.06	3902.4	922.076
497.668	3716.82	3764.62	3497.09	5704.73	3023.82	3941.42	1028.39
499.667	3691.95	3789.94	3473.55	5878.42	3003.76	3967.52	1110.39
501.666	3692.85	3788.19	3450.3	5957.88	3000.15	3977.87	1148.03
503.664	3702.23	3784.09	3456.96	5968.04	3008.19	3983.9	1149.54
505.663	3694.5	3791.01	3481.95	5878.64	3008.64	3970.95	1108.29
507.662	3684.02	3791.89	3498.17	5681.87	2985.95	3928.38	1027.9
509.66	3704.99	3759.46	3507.52	5395.5	2960.3	3865.55	911.789
511.659	3752.35	3715.9	3540	5035.76	2958.43	3800.49	760.308
513.658	3751.95	3685.99	3588.27	4624.33	2962.58	3722.63	593.925
515.656	3737.71	3648.44	3642.37	4247.36	2962.16	3647.61	457.628
517.655	3709.86	3592.08	3706.32	3991.41	2953.02	3590.54	385.609
519.654	3677.92	3531.93	3756.1	3808.55	2970.75	3549.05	339.683
521.652	3638.57	3508.83	3801.86	3651.44	3008.56	3521.85	305.148
523.651	3612.25	3522.18	3843.63	3532.5	3049.25	3511.96	289.26
525.65	3607.1	3538.19	3887.57	3464.64	3086.1	3516.72	289.094
527.648	3583.91	3553.41	3930.34	3430.15	3101.44	3519.85	298.684
529.647	3570.02	3574.45	3985.54	3405.41	3127.66	3532.62	311.633
531.646	3567.9	3601.33	4029.93	3384.04	3155.61	3547.76	322.627
533.644	3556.25	3623.37	4056.34	3354.62	3177.67	3553.65	331.113
535.643	3539.3	3672.37	4062.87	3303.29	3210.6	3557.69	336.854
537.642	3546.67	3771.25	4030.96	3242.57	3277.81	3573.85	333.928
539.64	3573.04	3864.47	3979.39	3218.63	3348.52	3596.81	325.286
541.639	3630.49	3920.24	3935.67	3219.06	3404.43	3621.98	315.08
543.638	3703.1	3955.69	3899.43	3227.61	3463.71	3649.91	304.793
545.636	3796.25	3963.95	3888.59	3216.85	3529.78	3679.08	306.07
547.635	3886.6	3943.42	3867.84	3192.35	3576.54	3693.35	314.237
549.634	3957.62	3892.18	3824.19	3172.81	3599.95	3689.35	318.629
551.632	4025.82	3841.64	3786.77	3161.84	3610.83	3685.38	327.968
553.631	4074.96	3789.89	3735.85	3176.5	3581.26	3671.69	329.434
555.63	4077.29	3765.76	3681.05	3195.96	3532.97	3650.61	322.798
557.628	4044.2	3742.44	3646.87	3210.3	3503.53	3629.47	306.852
559.627	3977.58	3737.46	3627.61	3208	3481.72	3606.47	287.085
561.626	3888.83	3731.45	3636.48	3215.14	3460.6	3586.5	259.168
563.624	3797.54	3734.73	3663.19	3250.95	3453.74	3580.03	224.945
565.623	3720.26	3730.86	3700.9	3302.28	3447.26	3580.31	194.802
567.622	3721.54	3715.41	3770.45	3350.59	3467.3	3605.06	184.958
569.62	3728.15	3689.01	3858.39	3409.36	3499.72	3636.92	180.755
571.619	3741.55	3682.76	3968.57	3452.33	3528.02	3674.65	201.157
573.618	3771.49	3703.04	4106.24	3481.36	3530.77	3718.58	247.419
575.616	3806.49	3745.12	4266.57	3511.26	3513.67	3768.62	308.695
577.615	3858.23	3801.19	4451.82	3514.01	3473.59	3819.77	391.996
579.614	3894.08	3860.83	4641.37	3502.31	3428.52	3865.42	481.059
581.612	3923.39	3915.75	4837.5	3447.45	3371.08	3899.03	584.005
583.611	3944.93	3961	5021.71	3369.79	3318.13	3923.11	685.746
585.61	3975.84	4006.2	5163.99	3310.99	3290.05	3949.41	761.819
587.608	4010.2	4050.21	5278.69	3269.88	3285.27	3978.85	818.436
589.607	4034.85	4077.41	5356.04	3261.72	3300.58	4006.12	848.545
591.606	4046.22	4104.87	5388.84	3278.35	3313.71	4026.4	855.905
593.604	4044.53	4160.25	5373.12	3311.46	3350.77	4048.02	836.237
595.603	4037.4	4266.53	5291.23	3362.04	3393.92	4070.22	788.887
597.602	4016.67	4369.58	5147.04	3443.06	3424.86	4080.24	717.868
599.6	3999.19	4466.61	4963.87	3542.35	3438.63	4082.13	639.851
601.599	3974.02	4532.09	4778.95	3656.82	3434.52	4075.28	570.034
603.598	3950.68	4573.53	4603.38	3782.44	3397.94	4061.59	521.123
605.596	3940.54	4590.77	4469.22	3888.86	3342.99	4046.48	501.482
607.595	3945.81	4585.01	4366.44	3958.15	3306.22	4032.33	489.209
609.594	3966.41	4535.6	4307.35	3978.87	3263.26	4010.3	480.926
611.592	3978.33	4465.99	4285.51	3969.35	3227.38	3985.31	473.27
613.591	4000.72	4406.57	4318.87	3936.76	3222.23	3977.03	467.244
615.59	4032.22	4356.15	4372.72	3901.63	3222.03	3976.95	468.791
617.588	4039.15	4333.55	4404.88	3843.7	3221.29	3968.51	475.019
619.587	4041.16	4288.54	4423.56	3754.46	3241.6	3949.86	470.969
621.586	4057.39	4245	4420.19	3656.3	3273.45	3930.47	464.142
623.584	4078.59	4214.53	4409	3578.4	3323.58	3920.82	453.716
625.583	4127.37	4162.08	4373.68	3527.66	3384.38	3915.03	432.473
627.582	4184.58	4091.32	4336.43	3485.93	3444.53	3908.56	414.306
629.58	4251	4037.48	4340.77	3419.27	3501.19	3909.94	426.038
631.579	4328.94	3995.65	4387.66	3355.41	3558.53	3925.24	458.518
633.578	4426.29	3968.14	4536.32	3330.03	3590.96	3970.35	520.131
635.576	4527.29	3969.93	4731.23	3315.21	3603.45	4029.42	599.062
637.575	4642.25	3958.39	4912.69	3297.87	3578.56	4077.95	686.917
639.574	4798.19	3922.03	5119.03	3291.29	3521.35	4130.38	797.152
641.572	4977.45	3909.18	5354.48	3286.84	3461.89	4197.97	922.021
643.571	5120.4	3896.51	5636.44	3284.01	3382.72	4264.02	1059.37
645.57	5237.37	3864.57	5946.76	3291.6	3314.87	4331.03	1200.27
647.568	5345.61	3830.27	6246.46	3307.67	3246.97	4395.39	1337.05
649.567	5424.09	3819.37	6551.42	3310.6	3234.83	4468.06	1460.8
651.566	5478.14	3820.16	6830.73	3324.92	3229.62	4536.72	1568.37
653.564	5489.86	3815.84	7094.11	3348.69	3206.44	4590.99	1668.44
655.563	5463.13	3823.87	7329.39	3406.73	3181.68	4640.96	1748.15
657.562	5390.42	3857.99	7537.26	3476.02	3149.59	4682.26	1812.18
659.56	5290.49	3893.66	7722.56	3550.35	3133.54	4718.12	1864.71
661.559	5157.72	3915.7	7876.05	3622.13	3134.88	4741.29	1904.91
663.558	5028.07	3946.41	7995.38	3693.36	3160.66	4764.77	1929.83
665.556	4911.24	3993.54	8080.73	3739.71	3208.22	4786.69	1941.84
667.555	4780.15	4052.43	8120.99	3766.95	3267.37	4797.58	1936.77
669.554	4649.51	4095.4	8098.87	3765.78	3362.61	4794.44	1906.39
671.552	4536.85	4127.36	8036.58	3741.92	3463.83	4781.31	1864.15
673.551	4413.63	4138.04	7924.03	3710.08	3557.76	4748.71	1807.27
675.55	4280.22	4155.03	7746.19	3679.1	3638.32	4699.77	1726.4
677.548	4175.05	4155.31	7514.04	3637.67	3689.77	4634.37	1629.31
679.547	4100.95	4155.87	7227.73	3605.48	3716.45	4561.29	1509.43
681.546	4068.28	4184.63	6908.4	3595.91	3707.67	4492.98	1372.15
683.544	4074.34	4232.98	6583.38	3593.09	3659.1	4428.58	1234.61
685.543	4082.39	4289.51	6273.78	3606.26	3597.78	4369.95	1106.03
687.542	4075.66	4329.34	5986.99	3617.65	3535.88	4309.11	993.25
689.54	4069.8	4352	5715.55	3616.84	3469.07	4244.65	894.608
691.539	4058.1	4363.03	5490.17	3628.09	3406.09	4189.09	816.706
693.538	4033.79	4378.79	5326.75	3624.48	3357.48	4144.26	767.249
695.536	3982.81	4428.04	5135.63	3604.56	3316.51	4093.51	716.412
697.535	3921.63	4504.51	4924.61	3575.91	3249.44	4035.22	680.546
699.534	3871.62	4608.63	4729.71	3548.2	3162.38	3984.11	675.251
701.532	3836.4	4708.63	4565.48	3542.05	3090.95	3948.7	684.035
703.531	3850.26	4801.24	4448.66	3541.5	3024.97	3933.33	707.881
705.53	3896.04	4878.65	4314.62	3539.64	2966.88	3919.16	729.455
707.528	3931.32	4920.95	4159.55	3532.3	2930.73	3894.97	739.129
709.527	3971.32	4945.09	4025.1	3521.69	2917.67	3876.17	744.683
711.526	3989.2	4945.23	3912.94	3513.39	2912.96	3854.74	743.996
713.524	3974.73	4934.42	3841.3	3495.58	2915.5	3832.31	739.754
715.523	3948.55	4882.04	3810.43	3495.9	2931.05	3813.59	714.075
717.522	3905.44	4817.57	3811.95	3505.43	2944.48	3796.97	682.889
719.52	3865.57	4772.9	3835.85	3496.46	2941.86	3782.53	666.919
721.519	3827.96	4730.71	3874.93	3480.92	2955	3773.9	649.049
723.518	3806.86	4728.71	3938.96	3488.16	2964.89	3785.52	647.2
725.516	3801.24	4740.88	3987.11	3493.35	2976.59	3799.84	650.443
727.515	3826.32	4739.88	4022.67	3508.83	3001.92	3819.92	642.916
729.514	3889.74	4715.19	4043.95	3536.09	3013.72	3839.74	629.511
731.512	3976.09	4674.24	4046.17	3569.09	2997.31	3852.58	620.426
733.511	4046.41	4617.03	4017.88	3613.83	2982.54	3855.54	604.816
735.51	4098.76	4575.97	3990.06	3620.81	2989.78	3855.08	591.799
737.508	4150.39	4543.04	3990.54	3597.05	3009.39	3858.08	583.217
739.507	4193	4546.73	3994.71	3537.4	3026.74	3859.72	591.403
741.506	4231.53	4604.92	3963.81	3473.1	3036.83	3862.04	618.668
743.504	4271.13	4722.77	3919.09	3410.82	3040.02	3872.76	668.992
745.503	4298.02	4858.4	3874	3368.14	3046.25	3888.96	722.632
747.502	4294.62	4994.96	3858.67	3355.32	3044.84	3909.68	771.99
749.5	4291.64	5072.31	3838.21	3342	3035.34	3915.9	804.558
751.499	4299.77	5114.38	3800.55	3346.48	3037.92	3919.82	820.369
753.498	4296.59	5117.73	3725.87	3373.45	3050.32	3912.79	816.835
755.496	4268.32	5082.75	3640.55	3399.48	3086.2	3895.46	792.871
757.495	4215.58	4995.73	3588.53	3428.62	3128.19	3871.33	743.471
759.494	4137.61	4859.64	3567.75	3487.99	3162.57	3843.11	668.041
761.492	4059.7	4712.9	3566.32	3572.52	3191.59	3820.61	586.347
763.491	4001.58	4554.28	3575.35	3646.53	3239.95	3803.54	499.294
765.49	3974.47	4441.78	3579.9	3705.82	3306.92	3801.78	430.915
767.488	3998.24	4380.25	3586.63	3752.43	3371.56	3817.82	389.152
769.487	4043.05	4342.82	3571.23	3763.8	3448.05	3833.79	362.469
771.486	4132.35	4375.41	3555.87	3741.29	3530.85	3867.15	372.322
773.484	4271.65	4394.59	3562.17	3689.83	3613.03	3906.25	394.712
775.483	4467.6	4412.36	3571.69	3613.36	3678.18	3948.64	450.558
777.482	4706.28	4416.09	3603.6	3555.21	3739.64	4004.16	523.126
779.48	4997.55	4407.63	3654.8	3525.65	3782.72	4073.67	617.558
781.479	5212.73	4381.04	3750.49	3542.25	3810.68	4139.44	675.706
783.478	5294.78	4358.53	3854.84	3580.71	3850.53	4187.88	679.656
785.476	5280.71	4352.05	3922.93	3622.24	3891.64	4213.91	651.107
787.475	5203.71	4362.41	3976.42	3662.73	3916.63	4224.38	602.036
789.474	5232.08	4394.19	4017.4	3692.35	3924.17	4252.04	603.425
791.472	5250.31	4407.57	4046.71	3703.16	3894.99	4260.55	610.591
793.471	5278.5	4396.68	4044.48	3716.1	3847.08	4256.57	626.246
795.47	5275.27	4352.88	4034.25	3717.97	3800.56	4236.19	630.951
797.468	5233.51	4270.76	4044.48	3718.19	3765.78	4206.54	615.997
799.467	5146.53	4163.75	4043.44	3722.23	3731.72	4161.53	583.502
801.466	5052.24	4055.68	4013.69	3745.86	3698.24	4113.14	548.208
803.464	4969.25	3947.62	3958.97	3787.41	3641.16	4060.88	524.239
805.463	4889.75	3914.33	3912.86	3867.54	3543.5	4025.6	507.261
807.462	4789.24	3908.91	3861.32	3974.68	3441.77	3995.18	490.553
809.46	4673.93	3894.11	3820.65	4057	3360.54	3961.25	474.924
811.459	4563.41	3887.04	3774.32	4111.63	3303.02	3927.88	461.89
813.458	4475.79	3890.01	3767.17	4130.1	3288.03	3910.22	440.512
815.456	4452.08	3892.19	3813.09	4118.19	3269.53	3909.02	435.058
817.455	4482.16	3880.92	3869.5	4062.24	3228.61	3904.69	451.99
819.454	4552.9	3851.94	3921.13	3953.83	3180.31	3892.02	487.229
821.452	4657.8	3829.77	3982.4	3824.63	3156.91	3890.3	534.645
823.451	4801.24	3827.24	4030.98	3688.71	3133.17	3896.27	605.658
825.45	4913.36	3842.78	4055.31	3553.68	3097.97	3892.62	674.022
827.448	4977.44	3867.75	4054.13	3441.95	3068.86	3882.02	721.918
829.447	5012.93	3883.91	4017.77	3398.3	3032.6	3869.1	750.345
831.446	4976.02	3880.05	3949.91	3364.01	3000.99	3834.19	747.425
833.444	4902.14	3873.03	3845.57	3348.62	2996.49	3793.17	719.595
835.443	4774.39	3853.3	3745.97	3327.63	3015.41	3743.34	666.682
837.442	4621.34	3847.62	3663.26	3323.42	3045.96	3700.32	600.332
839.44	4465.15	3858.88	3616.48	3329.96	3088.04	3671.7	530.35
841.439	4338.82	3878.54	3597.53	3328.13	3159.02	3660.41	467.325
843.438	4253.93	3884.98	3578.27	3333.78	3217.64	3653.72	421.886
845.436	4216.78	3887.4	3560.41	3350.93	3261.08	3655.32	395.66
847.435	4177.5	3873.98	3576.67	3347.3	3288.9	3652.87	372.754
849.434	4142.83	3850.87	3627.99	3350.8	3305.98	3655.7	350.508
851.432	4088.47	3861.32	3684.68	3362.78	3290.84	3657.62	335.158
853.431	4019.21	3901.72	3733.21	3386.05	3271.07	3662.25	323.695
855.43	3965.92	3985.21	3786.6	3440.52	3277.85	3691.22	318.084
857.428	3925.01	4097.95	3825.97	3540.34	3287.01	3735.25	321.987
859.427	3894.64	4258.98	3842.79	3685.76	3315.74	3799.58	342.421
861.426	3886.27	4443.14	3836.63	3883.36	3378.34	3885.55	377.678
863.424	3868.22	4635.28	3808.31	4123.07	3442.54	3975.49	441.754
865.423	3838.62	4823.32	3735.66	4408.53	3477.87	4056.8	547.075
867.422	3808.21	4993.01	3650.39	4669.69	3485.61	4121.38	667.923
869.42	3801.44	5171.83	3584.97	4922.83	3467.18	4189.65	796.956
871.419	3821.08	5349	3545.21	5093.32	3403.64	4242.45	910.458
873.418	3846.41	5531.76	3520.7	5211.06	3330.58	4288.1	1012.35
875.416	3855.92	5717.88	3520.48	5281.34	3280.34	4331.19	1096.94
877.415	3879.11	5893.77	3558.24	5302.04	3247.19	4376.07	1156.61
879.414	3928.02	6067.84	3603.44	5258.57	3232.71	4418.12	1197.61
881.412	3960.9	6232.49	3650.33	5135.79	3255.83	4447.07	1219.86
883.411	3981.71	6365.41	3708.88	4963.33	3295.51	4462.97	1228.1
885.41	3986.04	6466.43	3760.77	4771.46	3327.85	4462.51	1236.73
887.408	3965.22	6518.42	3798.42	4571.08	3341.79	4438.98	1242.99
889.407	3910.58	6533.4	3813.86	4377.94	3320.72	4391.3	1254.94
891.406	3831.67	6506.35	3794.89	4221.8	3274.02	4325.75	1264.7
893.404	3774.73	6466.46	3750.14	4109.44	3192.73	4258.7	1277.27
895.403	3742.5	6406.51	3669.63	4099.6	3112.34	4206.12	1279.86
897.402	3732.01	6341.07	3586.96	4181.2	3050.62	4178.37	1274.57
899.4	3734.59	6271.32	3532.64	4354.24	3007.42	4180.04	1264.55
901.399	3749.55	6178.38	3517.26	4609.16	2988.42	4208.55	1246.8
903.398	3757.75	6092.63	3516.05	4922.24	2985.19	4254.77	1247.78
905.396	3759.16	5994.45	3520.71	5242.91	2998.31	4303.11	1260.4
907.395	3750	5889.72	3547.45	5541.22	3007.72	4347.22	1284.08
909.394	3765.96	5792.31	3583.65	5801.58	3012.33	4391.17	1313.07
911.392	3805.85	5712.78	3630.31	5995.34	3006.49	4430.15	1337.09
913.391	3841.56	5670.8	3675.67	6160.73	3000.4	4469.83	1368.04
915.39	3870.77	5609.37	3708.14	6298.07	3032.61	4503.79	1382.02
917.388	3912.09	5533.62	3731.97	6410.96	3092.02	4536.13	1381.26
919.387	3950.12	5441.93	3762.26	6461.63	3174.65	4558.12	1352.91
921.386	3982.17	5297.62	3788.65	6457.13	3274.35	4559.99	1296.62
923.384	4022.71	5114.13	3814.68	6383.86	3372.13	4541.5	1213.16
925.383	4075.06	4928.15	3817.58	6206.24	3497.75	4504.95	1089.18
927.382	4135.2	4733.62	3807.78	5939.74	3633.59	4449.99	932.446
929.38	4176.76	4570.61	3777.7	5607.77	3764.72	4379.51	762.624
931.379	4211.5	4438.89	3763.33	5215.78	3893.3	4304.56	574.259
933.378	4248.87	4311.17	3780.84	4883.91	3973.11	4239.58	418.876
935.376	4270.35	4224.15	3811.55	4599.97	4026.97	4186.6	293.874
937.375	4290.48	4173.65	3845.18	4379.98	4043.44	4146.55	210.592
939.374	4295.26	4136.77	3861.56	4256.86	4015	4113.09	178.399
941.372	4282.19	4099.66	3868.25	4189.28	3933.68	4074.61	172.707
943.371	4248.77	4103.94	3850.37	4151.64	3836.34	4038.21	185.445
945.37	4210.98	4152.63	3804.21	4145.54	3744.1	4011.49	219.176
947.368	4163.91	4212.44	3764.74	4141.85	3680.2	3992.63	249.733
949.367	4120.55	4286.14	3758.64	4143.39	3638.46	3989.43	276.305
951.366	4082.6	4386.57	3782.51	4156.17	3573.41	3996.25	320.101
953.364	4025.25	4495.58	3799.8	4144.88	3486.15	3990.33	377.785
955.363	3973.7	4623.02	3809.39	4110.76	3403.09	3983.99	445.105
957.362	3921.96	4705.32	3791.46	4050.83	3346.92	3963.3	492.294
959.36	3899.14	4758.78	3754.06	3990.98	3311.95	3942.98	525.274
961.359	3879.83	4778.57	3719.85	3934.03	3305.76	3923.61	537.641
963.358	3865.14	4774.93	3714.31	3888.99	3330.48	3914.77	530.234
965.356	3849.81	4723.83	3691.45	3875.99	3376.48	3903.51	499.824
967.355	3818.37	4628.16	3668.78	3901.44	3422.34	3887.82	452.148
969.354	3800.75	4520.51	3661.66	3967.21	3486.86	3887.4	395.631
971.352	3793.4	4400.24	3656.45	4037.62	3547.35	3887.01	340.357
973.351	3788.68	4285.58	3647.72	4113.37	3604.47	3887.96	298.685
975.35	3791.93	4177.26	3647.72	4185.72	3655.04	3891.53	270.869
977.348	3797.92	4097.44	3649.42	4245.36	3672.59	3892.55	265.945
979.347	3819.56	4047.76	3635.54	4295.42	3661.32	3891.92	278.944
981.346	3855.83	3992.04	3628.39	4324.07	3615.54	3883.17	293.06
983.344	3909.27	3933.1	3624.64	4345.18	3527.3	3867.9	319.742
985.343	3965.08	3880.58	3615.15	4342.55	3433.57	3847.39	348.323
987.342	4031.08	3857.5	3594.07	4309.01	3350.38	3828.41	372.936
989.34	4087.89	3852.64	3584.98	4261.92	3287.95	3815.08	389.33
991.339	4141.76	3844.3	3588.58	4185.19	3262.42	3804.45	387.532
993.338	4197.42	3840.54	3588.25	4099.16	3252.01	3795.48	385.394
995.336	4268.28	3848.89	3560.06	4004.48	3254.95	3787.33	392.855
997.335	4404.28	3888.93	3529.07	3933.99	3279.69	3807.19	428.626
999.334	4591.89	3936.08	3486.85	3888.82	3316.36	3844	493.909
1001.33	4804.74	3996.76	3421.48	3831.2	3364.01	3883.64	580.428
1003.33	5050.03	4060.33	3366.16	3767.08	3422.52	3933.22	684.363
1005.33	5290.85	4097.73	3335.71	3696.42	3487.46	3981.64	785.86
1007.33	5492.93	4093.62	3322.53	3643.13	3575.79	4025.6	866.114
1009.33	5686.74	4067.01	3306.6	3610.78	3726.43	4079.51	938.765
1011.33	5888.47	4013.33	3295.44	3571.26	3944.73	4142.65	1018.33
1013.32	6073.73	3970.03	3298.31	3534.13	4219.95	4219.23	1097.58
1015.32	6243	3956.67	3298.87	3511.99	4549.67	4312.04	1180.88
1017.32	6361.62	3963.43	3291.38	3493	4933.58	4408.6	1262.39
1019.32	6427.95	3974.19	3299.59	3473.29	5305.4	4496.08	1335.77
1021.32	6433.94	3998.52	3340.79	3459.53	5624.36	4571.43	1383.53
1023.32	6374.06	4018.07	3400.07	3452.84	5890.29	4627.07	1405.61
1025.32	6271.94	4021.35	3448.35	3445.04	6103.9	4658.12	1417.33
1027.32	6149.93	4008.87	3491.55	3429.27	6275.16	4670.96	1425.83
1029.31	6047.49	4003.79	3542.21	3416.59	6390.14	4680.04	1426.77
1031.31	5953.46	4032.76	3577.27	3402.08	6445.34	4682.18	1414.76
1033.31	5818.9	4083.2	3577.61	3372.25	6425.34	4655.46	1380.39
1035.31	5656.24	4169.14	3548.93	3365.37	6314.52	4610.84	1310.47
1037.31	5482.6	4290.51	3484.59	3367.95	6123.62	4549.85	1219.19
1039.31	5319.77	4439.16	3417.65	3369.82	5866.89	4482.66	1117.07
1041.31	5174.48	4564.92	3373.25	3377.47	5541.21	4406.27	1003.62
1043.3	5072.04	4642.9	3344.02	3387.91	5154.63	4320.3	892.715
1045.3	5013.42	4695.49	3321.48	3394.76	4781.8	4241.39	815.06
1047.3	4927.75	4709.65	3295.71	3410	4466.68	4161.96	757.478
1049.3	4820.34	4688.27	3289.65	3415.86	4235.76	4089.98	708.449
1051.3	4689.82	4619.27	3303.36	3394.68	4056.23	4012.67	654.491
1053.3	4549.34	4517.05	3322.02	3366.66	3912.64	3933.54	594.864
1055.3	4398.18	4411.92	3357.86	3360.72	3801.52	3866.04	524.146
1057.3	4268.3	4299	3388.73	3363.39	3700.85	3804.05	457.664
1059.29	4218.81	4223.22	3443.2	3373.04	3610.44	3773.74	417.312
1061.29	4164.15	4217.39	3524.74	3384.82	3526.14	3763.45	394.741
1063.29	4116.19	4202.42	3601.76	3403.78	3450.06	3754.84	377.649
1065.29	4100.95	4191.58	3666.58	3460.88	3381.94	3760.39	368.657
1067.29	4099.23	4182.41	3708.04	3558.39	3350.88	3779.79	354.358
1069.29	4114.46	4174.91	3727.48	3676.13	3366.9	3811.98	334.253
1071.29	4137.6	4162.4	3732.07	3820.26	3417.6	3853.98	309.028
1073.28	4158.84	4132.08	3711.49	3954.14	3475.56	3886.42	290.928
1075.28	4157.91	4082.82	3675.91	4085.97	3530.56	3906.64	283.289
1077.28	4153.11	4055.73	3606.62	4226.01	3575.02	3923.3	309.666
1079.28	4132.5	4029.79	3544	4362.32	3615.26	3936.77	348.457
1081.28	4084.19	4012.18	3498.89	4463.12	3640.53	3939.78	382.071
1083.28	4006.61	4002.13	3440.58	4532.42	3654.87	3927.32	415.082
1085.28	3931.19	4030.37	3406.16	4630.54	3690.43	3937.74	456.162
1087.28	3860.57	4072.36	3404.2	4687.68	3730.49	3951.06	477.815
1089.27	3819.39	4116.75	3414.47	4704.55	3741.39	3959.31	485.821
1091.27	3828.21	4175.28	3420.55	4668.61	3726.61	3963.85	477.298
1093.27	3839.01	4244.31	3438.17	4589.79	3668.35	3955.93	460.812
1095.27	3838.85	4333.08	3453.08	4478.76	3575.28	3935.81	454.158
1097.27	3846.4	4454.42	3455.04	4334.95	3485.57	3915.28	465.834
1099.27	3863.83	4589.7	3442.83	4173.07	3390.86	3892.06	504.845
1101.27	3874.68	4702.3	3430.32	3993.69	3304.91	3861.18	552.338
1103.26	3865.77	4783.57	3420.97	3849.11	3244.88	3832.86	595.941
1105.26	3866.1	4839.08	3397.03	3722.36	3204.78	3805.87	633.755
1107.26	3871.58	4872.53	3375.58	3615.76	3177.67	3782.62	662.438
1109.26	3872.32	4889.17	3353.68	3523.11	3166.75	3761	682.057
1111.26	3857.36	4867.58	3315.09	3461.24	3171.48	3734.55	683.105
1113.26	3815.65	4808.17	3282.28	3418.08	3169.57	3698.75	666.469
1115.26	3772.23	4691.49	3276.14	3388.87	3167.57	3659.26	620.469
1117.26	3740.32	4553.47	3288.95	3361.04	3150.49	3618.85	566.334
1119.25	3729.55	4438.11	3285.08	3340.16	3143.69	3587.32	522.81
1121.25	3755.69	4353.04	3274.26	3295.62	3154.53	3566.63	495.716
1123.25	3771.51	4371.58	3276.6	3249.41	3179.74	3569.77	506.04
1125.25	3777.6	4439.39	3279.28	3218.23	3188.53	3580.6	536.69
1127.25	3782.69	4544.24	3281.83	3198.21	3212.9	3603.97	578.231
1129.25	3820.05	4655.64	3283.27	3174.69	3264.46	3639.62	622.241
1131.25	3880.79	4795.22	3300.21	3159.82	3328.09	3692.83	674.886
1133.24	3940.98	4972.2	3324.56	3155.99	3387.43	3756.23	740.838
1135.24	4020.7	5191.23	3366.47	3182.71	3443.44	3840.91	817.312
1137.24	4085.98	5425.77	3406.44	3248.88	3508.56	3935.13	891.232
1139.24	4133.97	5667.77	3447.41	3362.64	3559.75	4034.31	961.63
1141.24	4165.96	5856.46	3482.92	3562.18	3601.16	4133.74	1000.34
1143.24	4177.55	6045.84	3543.56	3838.38	3617.13	4244.49	1036.72
1145.24	4163.53	6193.83	3596.49	4176.86	3595.98	4345.34	1072.46
1147.24	4129.22	6310.34	3639.41	4583.56	3529.95	4438.5	1127.44
1149.23	4116.87	6398.16	3658.92	5015.04	3437.41	4525.28	1209.17
1151.23	4145.68	6449.6	3657.98	5397.33	3337.51	4597.62	1298.5
1153.23	4222.06	6447.89	3641.03	5718.33	3227.97	4651.46	1378.14
1155.23	4296.23	6392.27	3627.46	5977.86	3120.99	4682.96	1440.65
1157.23	4357.2	6303.36	3610.73	6196.41	3036.13	4700.76	1490.17
1159.23	4420.82	6177.52	3600.34	6368.65	2983.01	4710.07	1516.76
1161.23	4480.15	6018.77	3607.28	6489.14	2956.26	4710.32	1518.44
1163.22	4522.91	5816.49	3600.81	6561.02	2945.17	4689.28	1502.36
1165.22	4546.87	5596.27	3568.1	6561.67	2955.23	4645.63	1466.56
1167.22	4551.78	5357.8	3518.33	6474.02	2972.61	4574.91	1405.68
1169.22	4525.3	5148.7	3484.81	6305.8	2984.91	4489.9	1323.63
1171.22	4461.44	5004.65	3452.35	6061.49	3013.62	4398.71	1219.63
1173.22	4371.8	4986.06	3422.72	5767.08	3049.46	4319.42	1113.52
1175.22	4286.18	4983.25	3404.66	5414.61	3093.9	4236.52	993.169
1177.22	4203.36	4993.79	3388.79	5041.53	3130.29	4151.55	884.432
1179.21	4125.93	5016.82	3382.45	4713.96	3153.88	4078.61	810.234
1181.21	4074.69	5052.85	3366.37	4447.08	3162.69	4020.73	776.914
1183.21	4041.24	5090.1	3336.03	4229.42	3159.42	3971.24	772.326
1185.21	4027.68	5134.48	3327.07	4083.05	3145.08	3943.47	784.609
1187.21	4019.19	5211.11	3347.13	3977.83	3130.4	3937.13	810.914
1189.21	4004.1	5270.67	3368.38	3898.26	3139.08	3936.1	828.355
1191.21	4005.32	5274.66	3394.83	3845.56	3152.23	3934.52	823.43
1193.2	4010.92	5240.14	3420.33	3789.25	3163.46	3924.82	804.679
1195.2	3999.64	5160.19	3419.17	3737.11	3174.74	3898.17	771.642
1197.2	3986.52	5060.52	3409.85	3686.77	3183.99	3865.53	732.589
1199.2	3967.92	4937.71	3396	3642.63	3183.38	3825.53	686.936
1201.2	3955.23	4814.06	3389.3	3633.26	3169.79	3792.33	641.436
1203.2	3983.02	4703.83	3384.75	3654.36	3153.75	3775.94	603.903
1205.2	4034.77	4605.06	3390.98	3679.51	3143.46	3770.76	572.676
1207.2	4102.65	4565.66	3397.03	3708.27	3130.58	3780.84	568.973
1209.19	4157.62	4568.95	3390.82	3764.36	3112.82	3798.91	583.115
1211.19	4178.37	4575.27	3370.85	3863.03	3111.42	3819.79	592.567
1213.19	4182.45	4569.45	3381.73	3962.27	3100.16	3839.21	596.173
1215.19	4175.15	4538.65	3410.08	4072.98	3092.36	3857.84	590.957
1217.19	4175.61	4485.4	3446.55	4174.85	3091.97	3874.88	580.854
1219.19	4170.02	4407.01	3489.6	4206.91	3091.39	3872.99	557.402
1221.19	4211.73	4334.48	3534.15	4164.39	3079.41	3864.83	537.793
1223.18	4220.07	4273.79	3576.69	4081.06	3072.71	3844.86	512.028
1225.18	4183.3	4247.14	3640.87	3952.45	3062.29	3817.21	484.292
1227.18	4122.11	4240.18	3753.82	3821.99	3045.89	3796.8	466.037
1229.18	4047.77	4264.63	3877.45	3705.2	3044.08	3787.83	464.47
1231.18	3987.99	4327.01	4009.38	3643.49	3037.79	3801.13	490.504
1233.18	3966.85	4406.41	4091.84	3610.47	3039.9	3823.09	522.435
1235.18	3988.22	4480.75	4131.31	3564.84	3039.56	3840.94	555.386
1237.18	4023.76	4559.72	4117.93	3536.31	3050.79	3857.7	579.337
1239.17	4065.93	4643.38	4067.11	3522.11	3063.81	3872.47	601.309
1241.17	4121.18	4736.26	3968.51	3508.33	3072.49	3881.35	630.354
1243.17	4189.29	4828.57	3861.73	3491.97	3076.21	3889.56	669.321
1245.17	4298.74	4923.06	3774.22	3474.96	3076.59	3909.51	721.05
1247.17	4452.76	5016.49	3741.05	3464.73	3089.6	3952.93	776.138
1249.17	4676.53	5118.54	3755.57	3453.42	3118.88	4024.59	842.713
1251.17	4972.78	5244.56	3746.53	3440.84	3135.46	4108.03	943.555
1253.16	5343.68	5357.58	3727.46	3451.98	3141.42	4204.42	1066.69
1255.16	5698.51	5462.18	3692.33	3492.56	3146.59	4298.43	1189.33
1257.16	6085.96	5524.9	3643.82	3547.27	3155.92	4391.57	1318.54
1259.16	6477.48	5540.07	3562.76	3600.03	3161.23	4468.31	1454.98
1261.16	6843.73	5508.88	3477.48	3640.26	3171.77	4528.42	1585.54
1263.16	7186.23	5429.76	3414.19	3673.16	3192.77	4579.22	1704.44
1265.16	7458.06	5310.44	3367.92	3701.54	3216.39	4610.87	1796.68
1267.16	7674.52	5200.99	3382.58	3694.43	3237.37	4637.98	1868.53
1269.15	7886.08	5121.18	3425.8	3669.84	3257.46	4672.07	1942.32
1271.15	8095.45	5124.23	3481.58	3618.88	3276.13	4719.25	2024.1
1273.15	8285.82	5160.12	3535.91	3564.75	3294.44	4768.21	2101.55
1275.15	8440.28	5181.66	3591.08	3500.45	3302.21	4803.14	2167.43
1277.15	8573.58	5188.25	3625.93	3454.74	3283.58	4825.22	2229.08
1279.15	8680.23	5182.97	3635.76	3403.83	3237.02	4827.96	2288.37
1281.15	8747.34	5146.79	3619.45	3367.71	3193.71	4815	2330.55
1283.14	8770.8	5093.77	3584.75	3345.74	3163.62	4791.74	2351.74
1285.14	8741.54	5033.5	3565.27	3339.19	3150.35	4765.97	2343.31
1287.14	8659.03	4929.09	3547.94	3336.34	3134.92	4721.46	2310.86
1289.14	8538.12	4808.37	3544.44	3338.01	3111.23	4668.04	2261.21
1291.14	8356.08	4717.28	3558.81	3338.16	3106.24	4615.31	2181.08
1293.14	8107.44	4651.91	3574.66	3365.27	3104.51	4560.76	2068.18
1295.14	7806.62	4668.82	3569	3415.3	3127.02	4517.35	1929.32
1297.14	7480.81	4676.58	3559.36	3483.88	3176.8	4475.48	1773.52
1299.13	7129.37	4680.16	3558.27	3573.94	3258.46	4440.04	1597.96
1301.13	6734.26	4674.17	3557.58	3668.7	3356.47	4398.24	1401.55
1303.13	6313.71	4666.39	3532.53	3770.84	3485.22	4353.74	1194.54
1305.13	5879.87	4630.99	3483.49	3863.15	3615.79	4294.66	991.345
1307.13	5491.08	4582.99	3439.71	3954.47	3735.8	4240.81	815.328
1309.13	5157.9	4543.73	3415.25	4036.64	3821.28	4194.96	674.824
1311.13	4900.78	4547.82	3412.12	4098.06	3867.9	4165.34	580.412
1313.12	4668.39	4590.18	3398.38	4158.28	3888.46	4140.74	523.323
1315.12	4464.55	4644.97	3394.2	4194.5	3869.45	4113.54	497.296
1317.12	4296.83	4669.13	3383.52	4195.53	3825.06	4074.01	489.218
1319.12	4175.89	4679.5	3365.37	4149.09	3750.72	4024.11	494.187
1321.12	4086.72	4672.86	3318.06	4073.18	3641.22	3958.41	512.525
1323.12	4042.19	4665.44	3272.98	3951.98	3521.01	3890.72	535.065
1325.12	4037.59	4667.17	3256.97	3801.76	3404.68	3833.64	559.897
1327.12	4042.31	4684.5	3250.97	3640.01	3298.55	3783.27	595.426
1329.11	4045.42	4694.27	3244.56	3510.71	3239.84	3746.96	622.871
1331.11	4048.34	4657.61	3251.66	3432.96	3210.71	3720.26	622.098
1333.11	4043.02	4583.63	3252.14	3363.79	3202.73	3689.06	603.895
1335.11	4020.57	4475.36	3261.9	3313.77	3205.5	3655.42	565.609
1337.11	3977.56	4363.72	3291.01	3294.29	3209.79	3627.27	515.581
1339.11	3942.04	4238.91	3341.3	3304.78	3227.68	3610.94	452.025
1341.11	3942.24	4143.16	3398.5	3334.4	3227	3609.06	406.82
1343.1	3978.92	4073.78	3424.45	3352.17	3208.16	3607.49	391.644
1345.1	4005.96	4058.35	3429.21	3373.93	3201.94	3613.88	391.36
1347.1	4019.52	4071.72	3416.09	3397.48	3199.39	3620.84	397.388
1349.1	4005.56	4090.29	3399.79	3427.32	3207.22	3626.04	395.493
1351.1	3959.34	4146.24	3413.06	3448.34	3212.85	3635.96	396.504
1353.1	3880.05	4220.21	3450.25	3478.61	3212.66	3648.36	399.557
1355.1	3799.58	4316.8	3503.92	3526.49	3220	3673.36	414.055
1357.1	3744.82	4437.77	3548.07	3572.36	3239.53	3708.51	446.473
1359.09	3730.26	4573.98	3581.23	3611.65	3248.44	3749.11	494.599
1361.09	3753.18	4678.53	3624.71	3664.63	3251.54	3794.52	530.026
1363.09	3771.44	4762.3	3654.65	3724.48	3233.07	3829.19	563.653
1365.09	3795.9	4827.42	3652.41	3769.77	3206.01	3850.3	595.502
1367.09	3805.47	4886.05	3638.56	3782.1	3193.4	3861.11	623.541
1369.09	3800.16	4917.67	3602.07	3760.67	3184.15	3852.94	643.264
1371.09	3780.25	4922.12	3566.03	3703.31	3172.9	3828.92	654.352
1373.08	3738.67	4930.05	3558.18	3634.81	3158.48	3804.04	666.711
1375.08	3697.79	4902.87	3567.02	3574.71	3143.17	3777.11	663.441
1377.08	3680.8	4849.11	3564.78	3519.97	3155.85	3754.1	642.844
1379.08	3703.47	4789.92	3551.92	3520.58	3167.85	3746.75	615.287
1381.08	3735.24	4763.27	3514.88	3525.57	3180.17	3743.82	603.552
1383.08	3749.92	4707.41	3462.13	3516.51	3209.68	3729.13	579.609
1385.08	3775.9	4602.98	3434.46	3482.46	3246.11	3708.38	534.937
1387.08	3808.9	4469.13	3418.15	3440.09	3267.5	3680.76	483.638
1389.07	3819.3	4334.74	3428.67	3409.16	3272.37	3652.85	432.171
1391.07	3817.3	4195.96	3457.43	3366.12	3285.66	3624.49	378.558
1393.07	3810.61	4114.25	3486.17	3337.23	3308.89	3611.43	344.57
1395.07	3799.5	4080.75	3498.57	3328.83	3327.03	3606.93	327.494
1397.07	3807.87	4051.65	3490.38	3341.31	3328.98	3604.04	316.032
1399.07	3818.8	4019.15	3449.45	3340.85	3300.27	3585.7	317.095
1401.07	3823.99	3972.46	3401.44	3333.23	3254.65	3557.15	319.991
1403.06	3821.4	3899.81	3363.01	3339.67	3226.82	3530.14	307.286
1405.06	3842.75	3834.05	3329.6	3321.3	3202.56	3506.05	307.538
1407.06	3892.68	3792.91	3302.47	3300.35	3174.16	3492.51	325.868
1409.06	3986.18	3762.16	3291.72	3273.55	3157.95	3494.31	359.373
1411.06	4090.56	3728.15	3287.9	3244.96	3131.82	3496.68	401.98
1413.06	4185.98	3701.12	3274.11	3238.21	3102.13	3500.31	444.094
1415.06	4264.49	3701.67	3255.13	3229.68	3073.75	3504.95	484.696
1417.06	4306.15	3726.91	3238.48	3228.7	3054.76	3511	510.144
1419.05	4298.99	3762.39	3229.47	3242.16	3036.74	3513.95	514.915
1421.05	4254.82	3834.55	3237.56	3257.61	3009.32	3518.77	511.935
1423.05	4167.22	3930.65	3233.29	3257.37	2998.83	3517.47	502.566
1425.05	4044.85	4045.53	3225.16	3249.09	3013.55	3515.64	492.029
1427.05	3905.45	4149.45	3228.25	3226.74	3025.11	3507	489.889
1429.05	3787.28	4214.78	3246.59	3217.2	3036.58	3500.49	487.954
1431.05	3690.13	4254.37	3294.75	3198.7	3030.19	3493.63	489.554
1433.04	3642.05	4267.89	3324.21	3200.96	3019.67	3490.96	490.02
1435.04	3602.69	4269.77	3312.31	3215.03	3035.88	3487.14	483.247
1437.04	3601.38	4231.39	3285.98	3221.88	3047.02	3477.53	466.646
1439.04	3618.46	4177.04	3277.29	3223.51	3063.68	3471.99	442.976
1441.04	3643.46	4151.03	3312.42	3223.76	3089.84	3484.1	425.113
1443.04	3652.25	4152.34	3384.05	3234.87	3133.87	3511.48	408.002
1445.04	3657.9	4220.94	3461.31	3259.06	3188.13	3557.47	413.818
1447.04	3664.29	4314.54	3559.3	3314.77	3244.68	3619.52	424.87
1449.03	3646.97	4427.77	3648.88	3420.44	3280.34	3684.88	443.903
1451.03	3600.5	4572.44	3716.85	3564.78	3292.44	3749.4	485.675
1453.03	3540.82	4738.54	3760.84	3768.78	3278.71	3817.54	552.438
1455.03	3486.91	4908.72	3778.4	4026.33	3230.03	3886.08	645.521
1457.03	3467.86	5057.65	3777.61	4340.46	3171.99	3963.11	749.327
1459.03	3465.39	5210.67	3735.7	4728.35	3132.5	4054.52	878.858
1461.03	3483.39	5334.62	3671.25	5159.41	3108.11	4151.36	1022.42
1463.02	3499.04	5423.06	3624.3	5578.12	3117.14	4248.33	1159.61
1465.02	3542.65	5465.19	3587.21	5960.15	3136.82	4338.4	1278.77
1467.02	3608.17	5451.21	3573.26	6290.21	3165.59	4417.69	1370.28
1469.02	3662.96	5379.06	3551.9	6572.52	3187.69	4470.82	1447.89
1471.02	3724.71	5240.48	3532.25	6802.49	3215.64	4503.11	1503.07
1473.02	3797.07	5059.92	3484.37	6973.53	3255.84	4514.14	1541.46
1475.02	3862.37	4859.07	3426.02	7084.47	3298.8	4506.15	1566.14
1477.02	3900.91	4647.69	3384.11	7128.38	3340.88	4480.39	1571.3
1479.01	3926.91	4475.08	3346.16	7086.22	3378.92	4442.66	1548.33
1481.01	3925.64	4321.65	3323.51	6951.35	3425.4	4389.51	1487.34
1483.01	3900.12	4208.87	3285.57	6726.46	3456.33	4315.47	1396.03
1485.01	3844.22	4161.55	3260.13	6427.75	3454.92	4229.72	1277.21
1487.01	3785.63	4128.31	3264.38	6063.03	3425.14	4133.3	1129.3
1489.01	3729.04	4094.21	3275.28	5648.51	3361.46	4021.7	965.721
1491.01	3712.12	4085.65	3295.11	5225.38	3301.14	3923.88	798.133
1493	3703.95	4128.06	3321.38	4893.22	3259.85	3861.29	673.432
1495	3693.13	4192.1	3379.2	4625.38	3238.07	3825.58	577.926
1497	3698.57	4248.34	3452.33	4410.48	3222.89	3806.52	509.339
1499	3732.68	4294.33	3537.72	4274.76	3207.97	3809.49	472.527
1501	3756.16	4307.53	3645.11	4149.14	3196.58	3810.9	438.438
1503	3786.79	4277.44	3776.55	4016.45	3192.75	3810	401.182
1505	3813.59	4223.72	3912.74	3895.53	3189.17	3806.95	378.955
1507	3860.91	4138.24	4046.71	3815.53	3161.65	3804.61	382.951
1508.99	3907.51	4058.31	4140.95	3764.77	3124.95	3799.3	403.563
1510.99	3954.17	4001.36	4201.21	3753.52	3110.4	3804.13	419.199
1512.99	4011.05	3974.97	4224.57	3740.92	3111.63	3812.63	427.774
1514.99	4055.68	3968.79	4221.85	3720.79	3108.06	3815.03	434.666
1516.99	4073.36	3992.71	4168.22	3701.29	3096.27	3806.37	433.653
1518.99	4080.1	4050.27	4076.09	3685.67	3087.56	3795.94	429.499
1520.99	4079.18	4106.99	3989.11	3669.38	3091.28	3787.19	426.165
1522.98	4056.67	4171.47	3904.83	3641.22	3085.2	3771.88	432.161
1524.98	3997.15	4234.95	3872.33	3590.14	3077.22	3754.36	444.219
1526.98	3935.6	4309.38	3873.82	3538.42	3059.29	3743.3	470.19
1528.98	3886.78	4374.28	3883.21	3506.98	3039.63	3738.18	497.283
1530.98	3851.17	4431.47	3887.97	3480.34	3014.82	3733.15	525.705
1532.98	3825.43	4463.82	3878.13	3474.76	3002.91	3729.01	539.291
1534.98	3819.02	4464.27	3888.11	3482.98	2994.8	3729.84	541.666
1536.98	3827.5	4423.8	3916.51	3489.77	2975.84	3726.68	536.671
1538.97	3835.12	4359.7	3930.58	3504.45	2957.56	3717.48	523.104
1540.97	3829.73	4279.85	3919.37	3539.4	2947.9	3703.25	498.137
1542.97	3807.2	4168.45	3877.06	3534.68	2948.14	3667.11	460.841
1544.97	3764.15	4056.56	3817.76	3516.84	2950.92	3621.25	420.943
1546.97	3716.51	3965.01	3748.16	3473.59	2970.94	3574.84	379.896
1548.97	3659.78	3891.28	3686.94	3437.18	2981.01	3531.24	347.132
1550.97	3616.31	3851.28	3633.2	3413.29	2988.36	3500.49	325.561
1552.96	3561.97	3805.67	3627.56	3395.97	2994.65	3477.16	307.06
1554.96	3498.93	3756.73	3611.45	3408.73	3009.41	3457.05	282.009
1556.96	3461.96	3738.45	3595.1	3444.02	3023.68	3452.64	267.462
1558.96	3469.37	3731.11	3572.77	3479.58	3045.79	3459.72	254.094
1560.96	3504.6	3747.25	3535.93	3533.26	3072.42	3478.69	247.038
1562.96	3540.85	3759.45	3520.33	3590.18	3101.19	3502.4	243.183
1564.96	3571.79	3780.66	3537.19	3656.49	3121.31	3533.49	248.796
1566.96	3606.05	3832.27	3592.91	3720.5	3126.26	3575.6	269.262
1568.95	3651.01	3900.86	3674.47	3769.68	3112.76	3621.76	301.039
1570.95	3689.49	3978.35	3737.78	3807.77	3065.28	3655.73	347.745
1572.95	3718.28	4042.15	3753.47	3829.99	3022.41	3673.26	384.94
1574.95	3762.86	4090.27	3747.36	3822.75	3000.93	3684.83	406.549
1576.95	3809.71	4126.11	3719.42	3798.34	2990.43	3688.8	420.275
1578.95	3844.64	4144.77	3685.42	3765.59	2994.8	3687.04	424.183
1580.95	3874.74	4150.09	3682.28	3739.2	3009.69	3691.2	421.637
1582.94	3894.84	4167.16	3710.73	3726.2	3032.64	3706.32	418.979
1584.94	3916.4	4186.41	3777.5	3733.73	3056.17	3734.04	418.118
1586.94	3944.83	4211.57	3807.56	3734.53	3063.92	3752.48	425.803
1588.94	3956.4	4242.53	3819.25	3733.34	3073.2	3764.94	432.203
1590.94	3945.57	4270.42	3820.02	3719.14	3107.28	3772.49	425.883
1592.94	3901.43	4301.63	3795.42	3672.57	3117.46	3757.7	428.689
1594.94	3845.15	4359.34	3741.82	3598.5	3120.2	3733	446.815
1596.94	3786.39	4403.74	3701.07	3532.56	3135.85	3711.92	460.517
1598.93	3722.29	4430.91	3692.58	3473.82	3136.34	3691.19	475.2
1600.93	3653.07	4437.54	3702.89	3410.06	3116.05	3663.92	491.103
1602.93	3610.95	4425.99	3717.49	3362.26	3098.93	3643.12	498.617
1604.93	3570.13	4378.59	3702.45	3320.5	3075.19	3609.37	492.62
1606.93	3524.39	4312.99	3682.63	3298.45	3058.08	3575.31	474.99
1608.93	3494.8	4254.58	3676.37	3305.83	3042.19	3554.75	456.298
1610.93	3499.96	4190.59	3662.06	3335.28	3004.82	3538.54	438.203
1612.92	3519.52	4150.19	3650.85	3379.54	2974.64	3534.95	427.285
1614.92	3534.62	4105.48	3647.2	3431.31	2948.3	3533.38	416.231
1616.92	3543.27	4032.03	3642.43	3468.69	2917.95	3520.88	400.872
1618.92	3556.63	3943.68	3646.91	3479.39	2911.5	3507.62	376.865
1620.92	3557.57	3869.91	3632.16	3477.21	2913.81	3490.13	353.999
1622.92	3537.18	3803.28	3596.7	3448.97	2925.06	3462.24	327.394
1624.92	3530.55	3775.68	3565.76	3389.36	2933.92	3439.05	314.393
1626.92	3539.23	3775.3	3561.36	3344.44	2924.65	3429	320.59
1628.91	3531.51	3769.85	3570.62	3316.57	2920.78	3421.87	323.037
1630.91	3514.84	3772.82	3623.3	3316.25	2931.95	3431.83	325.217
1632.91	3520.12	3778.09	3699.65	3336.33	2936.17	3454.07	336.059
1634.91	3547.77	3777.93	3777.79	3358.34	2967.1	3485.79	339.018
1636.91	3599.16	3749.7	3859.22	3383.81	3020.05	3522.39	332.628
1638.91	3650.07	3696.8	3943.58	3401.96	3084.07	3555.29	326.087
1640.91	3680.92	3630.28	4010.47	3422.68	3168.5	3582.57	313.076
1642.9	3707.06	3574.21	4075.72	3446.97	3269.07	3614.61	304.264
1644.9	3727.09	3546.44	4148.56	3470.38	3384.75	3655.45	303.192
1646.9	3764.2	3537.01	4169.39	3496.59	3501.62	3693.76	287.9
1648.9	3808.65	3546.98	4154.04	3533.94	3611.41	3731	260.763
1650.9	3871.59	3585.17	4101.24	3552.95	3711.1	3764.41	226.177
1652.9	3941.65	3635.35	4041.5	3564.94	3789.18	3794.52	200.449
1654.9	3994.14	3706.47	3986.91	3565.02	3846.23	3819.75	184.914
1656.9	4042.39	3784.16	3968.52	3537.41	3867.66	3840.03	195.527
1658.89	4081.7	3824.55	3989.72	3495.6	3852.5	3848.81	223.301
1660.89	4130.27	3844.59	4019.44	3463.21	3821.07	3855.72	253.757
1662.89	4177.56	3843.35	4042.03	3435.45	3765.97	3852.87	284.202
1664.89	4213.41	3846.87	4049.8	3416.47	3689.86	3843.28	310.387
1666.89	4216.28	3845.13	4035.82	3391.58	3612.7	3820.3	328.164
1668.89	4186.21	3844.64	4004.06	3358.74	3523.36	3783.4	340.093
1670.89	4109.96	3830.03	3993.01	3329.16	3441.76	3740.78	341.586
1672.88	4009.19	3819.83	4011.41	3326.05	3361.58	3705.61	339.538
1674.88	3905.7	3797.36	4043.39	3321.23	3321.13	3677.76	336.987
1676.88	3824.48	3788.44	4004.44	3334.53	3286.51	3647.68	318.927
1678.88	3771.47	3806.72	3942.61	3358.51	3267.06	3629.27	297.657
1680.88	3738.93	3859.41	3828.04	3404.35	3236.91	3613.53	277.395
1682.88	3738.97	3925.75	3689.62	3467.69	3189.57	3602.32	282.572
1684.88	3756.58	4019.18	3562.66	3509.8	3152.56	3600.16	320.141
1686.88	3778.72	4156.32	3505.45	3534.11	3129.76	3620.87	378.701
1688.87	3809.56	4330.18	3480.45	3546.3	3118.64	3657.03	449.918
1690.87	3862.33	4468.7	3472.65	3531.09	3101.63	3687.28	513.495
1692.87	3927.16	4587.07	3487.98	3484.53	3097.57	3716.86	568.196
1694.87	3990	4683.41	3502.08	3440.85	3110.14	3745.3	611.393
1696.87	4031.61	4759.37	3515.51	3415.5	3126.3	3769.66	642.667
1698.87	4062.61	4797.87	3520.43	3408.5	3148.98	3787.68	655.594
1700.87	4065.93	4779.1	3506.06	3390.08	3182.82	3784.8	644.893
1702.86	4035.64	4724.02	3468.32	3383.39	3200.03	3762.28	621.645
1704.86	3972.67	4662.58	3437.02	3415.74	3203.35	3738.27	589.534
1706.86	3909.03	4590.07	3433.54	3450.4	3207.76	3718.16	549.972
1708.86	3851.65	4493.66	3432.39	3493.26	3179.45	3690.08	509.344
1710.86	3818.54	4390.41	3445.54	3562.29	3131.35	3669.63	472.542
1712.86	3799.57	4293.51	3459.12	3641.54	3103.45	3659.44	439.109
1714.86	3793.71	4199.34	3484.51	3711.66	3081.89	3654.22	411.179
1716.86	3797.96	4132.19	3499.61	3780.33	3082.49	3658.51	392.336
1718.85	3811.5	4089.34	3520.06	3840.66	3100.61	3672.43	378.038
1720.85	3812.65	4049.21	3561.48	3874.78	3138.21	3687.27	353.262
1722.85	3815.66	3992.11	3587.01	3884.13	3168.13	3689.41	326.993
1724.85	3818.29	3924.19	3597.55	3883.57	3194.39	3683.6	301.142
1726.85	3850.37	3875.46	3602.21	3869.67	3223.41	3684.22	281.8
1728.85	3926.7	3833.77	3603.58	3849.84	3231.42	3689.06	282.846
1730.85	4015.26	3845.61	3614.4	3808.91	3223.09	3701.45	302.99
1732.84	4076.95	3867.94	3640.79	3780.66	3230.01	3719.27	315.967
1734.84	4095.45	3874.82	3662.16	3772.45	3235.29	3728.03	318.451
1736.84	4054.92	3878.72	3652.94	3778.99	3245.08	3722.13	304.496
1738.84	3976.86	3867.72	3632.6	3779.11	3247.22	3700.7	283.105
1740.84	3874.02	3836.98	3626.33	3777.08	3215.56	3665.99	268.938
1742.84	3755.29	3799.36	3613.23	3782.44	3159.49	3621.96	268.774
1744.84	3633.67	3781.2	3565.08	3766.73	3108.52	3571.04	274.017
1746.84	3593.29	3767.03	3503.29	3744.06	3048.06	3531.15	291.11
1748.83	3579.53	3760.63	3456.19	3701.92	2993.99	3498.45	305.36
1750.83	3595.36	3742.55	3404.46	3630.31	2951.53	3464.84	311.719
1752.83	3629.24	3729.51	3351.09	3560.93	2926.43	3439.44	318.555
1754.83	3683.29	3734.86	3305.32	3501.85	2923.06	3429.68	329.692
1756.83	3743.96	3744.09	3273	3472.67	2922.22	3431.19	346.958
1758.83	3804.47	3738.85	3248.1	3472.21	2944.2	3441.57	355.603
1760.83	3861.54	3745.66	3221.2	3465.4	2965.51	3451.86	368.809
1762.82	3916.41	3775.12	3198.58	3481.86	2983.47	3471.09	388.232
1764.82	4002.44	3807.16	3177.38	3526.45	3010.71	3504.83	415.591
1766.82	4075.84	3846.77	3166.03	3564.95	3036.98	3538.12	440.092
1768.82	4123.18	3873.55	3182.58	3588.71	3048.41	3563.29	452.886
1770.82	4165.64	3891.33	3199.86	3582.76	3042.4	3576.4	467.271
1772.82	4196.44	3922.46	3248.85	3543.96	3043.16	3590.97	473.24
1774.82	4205.7	3949.23	3306.41	3497.1	3042.5	3600.19	473.399
1776.82	4179.88	3959.46	3347.36	3447.73	3019.08	3590.7	471.571
1778.81	4144.44	3950.11	3376	3399.31	2982.69	3570.51	470.684
1780.81	4088.51	3907.37	3374.92	3360.46	2968.08	3539.87	453.434
1782.81	4019.52	3863.77	3344.51	3341.26	2967.05	3507.22	428.773
1784.81	3936.05	3847.78	3299	3323.72	2973.46	3476	405.256
1786.81	3856.58	3847.44	3271.18	3310.5	2984.97	3454.14	384.341
1788.81	3807.14	3910.04	3253.59	3290.08	3006.6	3453.49	387.259
1790.81	3748.82	3991.86	3260.06	3253.87	3022.23	3455.37	400.092
1792.8	3699.65	4082.17	3285.58	3237.14	3036.88	3468.28	419.316
1794.8	3655.29	4172.6	3342.5	3237.21	3060.36	3493.59	436.877
1796.8	3651.12	4254.92	3407.94	3223.74	3072.53	3522.05	463.097
1798.8	3654.81	4328.94	3471.46	3217.16	3088.48	3552.17	486.741
1800.8	3641.21	4393.28	3536.96	3230.79	3128.05	3586.06	498.26
1802.8	3615.05	4422.33	3596.57	3257.41	3177.11	3613.69	492.882
1804.8	3584.95	4405.05	3636.19	3291.64	3210.59	3625.68	472.512
1806.8	3554.19	4342.94	3642.79	3317.54	3213.99	3614.29	442.624
1808.79	3516.42	4229.89	3636.3	3344.97	3185.67	3582.65	400.083
1810.79	3495.9	4097.91	3616.97	3350.97	3137.24	3539.8	359.542
1812.79	3495.06	3971.35	3604.14	3336.08	3099.11	3501.15	324.272
1814.79	3511.67	3872.04	3626.55	3337.51	3065.73	3482.7	303.339
1816.79	3540.15	3788.98	3654.22	3345.72	3076.62	3481.14	278.468
1818.79	3578.07	3741.9	3685.72	3322.74	3084.43	3482.57	274.637
1820.79	3637.14	3690.95	3728.54	3283.16	3096.28	3487.22	281.38
1822.78	3701.71	3671.76	3828.97	3258.61	3112.64	3514.74	310.5
1824.78	3752.15	3680.9	3983.16	3244.25	3110.55	3554.2	364.74
1826.78	3777.7	3703.47	4234.15	3236.97	3103.51	3611.16	453.351
1828.78	3788.18	3714.66	4544.55	3221.11	3108.84	3675.47	569.438
1830.78	3784.48	3736.98	4811.78	3219.29	3134	3737.31	668.774
1832.78	3778.28	3767.05	5028.58	3232.46	3156.74	3792.62	749.43
1834.78	3775.4	3801.19	5166.91	3238.33	3179.6	3832.28	800.659
1836.78	3804.89	3829.98	5251.39	3233.87	3189.73	3861.97	833.845
1838.77	3877.36	3861.54	5274.47	3231.16	3193.14	3887.53	842.228
1840.77	3997.74	3885.69	5232.02	3224.05	3169.38	3901.78	832.874
1842.77	4175.32	3913.15	5104.64	3220.56	3131.23	3908.98	803.022
1844.77	4396.37	3934.89	4907.75	3226.51	3088.46	3910.8	770.513
1846.77	4661.02	3938.53	4668.76	3221.62	3061.24	3910.23	764.007
1848.77	4975.16	3950.41	4392.43	3214.95	3042.74	3915.14	806.85
1850.77	5321.97	3987.93	4107.69	3236.09	3026.7	3936.08	904.127
1852.76	5664.24	4030.32	3885.45	3279.9	3006.2	3973.22	1035.17
1854.76	5968.35	4067.84	3741.33	3359.97	3006.28	4028.75	1155.3
1856.76	6214.41	4103.45	3613.67	3439.76	2997.13	4073.68	1260.56
1858.76	6432.38	4116.3	3517.11	3518.31	2981.54	4113.13	1357.25
1860.76	6650.67	4142.92	3458.26	3587.37	2979.79	4163.8	1450.59
1862.76	6845.29	4197.5	3399.38	3636.33	2970.07	4209.71	1538.55
1864.76	7028.88	4256.06	3370.15	3667.08	2963.92	4257.22	1619.4
1866.76	7193.16	4254.43	3343.01	3686.01	2946.26	4284.57	1695.34
1868.75	7324.3	4200.69	3304.31	3680.74	2918.67	4285.74	1763.39
1870.75	7407.82	4129.49	3287.17	3659.94	2902.61	4277.4	1807.85
1872.75	7423.65	4080.16	3304.57	3592.99	2902.38	4260.75	1819.47
1874.75	7376.42	4086.71	3316.13	3491.15	2912.42	4236.56	1805.36
1876.75	7274.44	4134.42	3314.02	3401.51	2931.64	4211.21	1766.86
1878.75	7126.39	4196.85	3286.32	3338.99	2970.53	4183.82	1706.62
1880.75	6930.78	4212.91	3263.47	3327.3	3022.73	4151.44	1617.88
1882.74	6710.99	4257.17	3236.23	3325	3076.43	4121.16	1519.39
1884.74	6448.92	4303.35	3182.46	3342.33	3139.46	4083.3	1404.99
1886.74	6132.99	4356.96	3136.54	3355.23	3196.85	4035.71	1272.5
1888.74	5762.44	4397.84	3093.99	3362.47	3255.47	3974.44	1122.81
1890.74	5382.69	4458.08	3087.08	3344.56	3310.72	3916.63	977.887
1892.74	5096.2	4511.51	3078.73	3312.23	3386.66	3877.07	878.304
1894.74	4937.17	4522.58	3088.57	3273.14	3448.54	3854	822.79
1896.74	4790.52	4498.15	3122.91	3239.44	3494.74	3829.15	763.24
1898.73	4640.38	4459.09	3154.64	3236.25	3532.98	3804.67	697.52
1900.73	4494.21	4384.83	3195.3	3243.36	3538.58	3771.26	625.235
1902.73	4366.39	4268.07	3231.78	3255.39	3536.53	3731.63	548.955
1904.73	4260.88	4145.4	3272.12	3280.79	3561.43	3704.12	471.938
1906.73	4174.13	4049.41	3313.41	3304.56	3608.91	3690.08	406.359
1908.73	4114.5	4017.12	3346.69	3342.71	3639.33	3692.07	363.395
1910.73	4088.49	4047.51	3354.76	3384.6	3646	3704.27	351.133
1912.72	4048.84	4093.63	3371	3417.68	3615.19	3709.27	343.271
1914.72	4005.66	4142.52	3410.48	3451.77	3552.89	3712.66	337.465
1916.72	3958.12	4137.15	3432.63	3476.32	3478.16	3696.48	327.26
1918.72	3933.04	4080.61	3467.12	3483.53	3390.44	3670.95	312.998
1920.72	3925.37	4100.41	3511.83	3466	3310.29	3662.78	334
1922.72	3909.7	4105.41	3551.53	3460.88	3244.24	3654.35	348.156
1924.72	3903.66	4085.51	3594.22	3478.01	3215.41	3655.36	344.755
1926.72	3903.53	4050.05	3674.45	3496.97	3197.26	3664.45	336.254
1928.71	3911.15	3999.56	3777.77	3528.7	3177.71	3678.98	331.773
1930.71	3904.66	3963.16	3924.54	3552.67	3158.01	3700.61	345.333
1932.71	3883.91	3931.2	4064.75	3595.62	3138.93	3722.88	368.575
1934.71	3842.43	3926.01	4135.46	3678.7	3125.9	3741.7	381.555
1936.71	3799.63	3902.35	4163.7	3767.85	3138.73	3754.45	377.72
1938.71	3760	3857.63	4146.36	3844.52	3166.44	3754.99	359.91
1940.71	3743.04	3805.21	4076.82	3900.03	3184.5	3741.92	336.112
1942.7	3722.81	3777.92	3942.73	3935.97	3182.86	3712.46	311.388
1944.7	3693.39	3770.13	3784.34	3924.7	3165.78	3667.67	292.715
1946.7	3662.13	3803.04	3638.17	3867.43	3120.35	3618.23	294.307
1948.7	3615.6	3850.72	3551.5	3789.93	3058.06	3573.16	312.898
1950.7	3587.04	3899.61	3491.45	3700.95	2984.44	3532.7	342.118
1952.7	3554.09	3971.96	3433.06	3618.55	2932.19	3501.97	376.363
1954.7	3540.62	4096.62	3389.28	3565.09	2892.67	3496.85	430.96
1956.7	3550.56	4229.79	3375.4	3515.89	2896.91	3513.71	477.941
1958.69	3559.24	4339	3382.55	3491.89	2904.84	3535.5	517.013
1960.69	3545.94	4431.27	3379.89	3482.62	2929.9	3553.93	546.482
1962.69	3534.53	4471.19	3361.29	3480.77	2944.28	3558.41	560.31
1964.69	3518.44	4482.43	3353.95	3468.77	2961.98	3557.11	561.463
1966.69	3501.63	4451.75	3348.83	3462.19	2970.06	3546.89	547.711
1968.69	3507.79	4383.89	3339.66	3469.28	2965.79	3533.28	521.489
1970.69	3530.46	4271.43	3362.31	3478.77	2969.88	3522.57	472.736
1972.68	3545.51	4156.34	3373.2	3485.91	2978.04	3507.8	424.637
1974.68	3568.04	4055.24	3381.75	3483.81	2982.86	3494.34	385.499
1976.68	3590.16	3999.69	3405.6	3485.19	3001.84	3496.5	358.835
1978.68	3603.63	3961.55	3430.21	3479.36	3055.2	3505.99	326.622
1980.68	3603.56	3930.03	3442.74	3453.57	3110.74	3508.13	296.769
1982.68	3619.5	3902	3461.11	3442.5	3160.77	3517.18	271.248
1984.68	3655.32	3886.13	3478.79	3423.97	3195.18	3527.88	259.076
1986.68	3700.14	3876.6	3490.67	3383.26	3201.26	3530.39	264.683
1988.67	3743.05	3857.41	3490.03	3352.26	3186.62	3525.87	275.5
1990.67	3783.84	3819.08	3464.4	3343.48	3144.33	3511.03	288.982
1992.67	3819.91	3788.73	3447.38	3356.13	3107.57	3503.94	301.288
1994.67	3851.5	3798.28	3455.51	3385.83	3085.09	3515.24	315.643
1996.67	3891.74	3831.92	3476.73	3432.09	3068.88	3540.27	334.12
1998.67	3948.91	3875.56	3493.19	3479.23	3042.81	3567.94	363.655
2000.67	4014.5	3937.99	3485.55	3487.06	3029.77	3590.97	398.954
2002.66	4053.89	3998.23	3455.84	3485.61	3002.61	3599.24	434.55
2004.66	4064.3	4028.44	3418.56	3458.58	2983.94	3590.76	455.841
2006.66	4046.26	4068.4	3396.24	3436.34	2990.82	3587.61	462.923
2008.66	4003.73	4103.98	3379.63	3399.82	3011.83	3579.8	460.85
2010.66	3916.33	4124.15	3370.88	3375.25	3012.36	3559.79	451.401
2012.66	3810.52	4147.94	3375.37	3356.89	3021.33	3542.41	439.432
2014.66	3706.84	4140.44	3369.25	3320.89	3043.33	3516.15	421.118
2016.66	3620.03	4124.47	3345.5	3291.34	3064.19	3489.11	406.547
2018.65	3611.35	4134.55	3327.97	3267.61	3065.81	3481.46	413.962
2020.65	3612.01	4159.92	3341.63	3275.11	3054.3	3488.59	424.763
2022.65	3615.01	4182.01	3355.47	3289.81	3015.82	3491.62	440.883
2024.65	3641.14	4193.15	3344.67	3312.05	2983.49	3494.9	454.556
2026.65	3682.73	4182.66	3334.01	3325.77	2977.11	3500.46	455.723
2028.65	3712.75	4186.83	3334.89	3330.35	2990.81	3511.13	455.984
2030.65	3712.89	4212.68	3323.01	3326.2	3012.02	3517.36	461.352
2032.64	3693.49	4199.1	3321.17	3305.04	3026.79	3509.12	452.679
2034.64	3668.77	4152.28	3319.8	3255.46	3040.16	3487.29	434.99
2036.64	3661.34	4069.24	3295.57	3210.99	3033.02	3454.03	413.187
2038.64	3665.75	3980.93	3259.98	3193.99	3008.71	3421.87	393.976
2040.64	3684.64	3878.52	3233.46	3192.63	2978.02	3393.45	373.695
2042.64	3696.88	3795.39	3233.05	3204.32	2923.77	3370.68	365.077
2044.64	3712.06	3710.54	3273.59	3235.41	2880.47	3362.41	353.459
2046.64	3703.03	3657.9	3343.07	3268.14	2868.84	3368.19	337.656
2048.63	3696.52	3618.43	3439.32	3290.28	2877.67	3384.44	324.36
2050.63	3723.64	3587.23	3555.95	3311.59	2899.73	3415.63	324.416
2052.63	3778.3	3590.85	3677.2	3304.19	2933.93	3456.89	341.537
2054.63	3832.69	3614.27	3798.49	3290.84	2982.01	3503.66	362.223
2056.63	3871.66	3625.28	3879.16	3288.46	3042.31	3541.37	368.528
2058.63	3893.88	3645.8	3938.52	3270.88	3100.56	3569.93	372.928
2060.63	3895.38	3677.28	3957.2	3257.64	3155.28	3588.56	365.767
2062.62	3878.86	3715.57	3937.39	3236.92	3236.81	3601.11	342.301
2064.62	3847.37	3765.39	3867.03	3215.33	3336.07	3606.24	307.119
2066.62	3822.89	3860.89	3769.65	3212.53	3436.18	3620.43	283.466
2068.62	3803.11	3989.95	3673.18	3229.97	3532.04	3645.65	287.135
2070.62	3793.2	4138.57	3579.4	3254.71	3618.39	3676.85	323.201
2072.62	3781.54	4240.24	3555.69	3262.28	3691.93	3706.34	357.351
2074.62	3803.42	4327.79	3537.19	3280.49	3742.41	3738.26	387.876
2076.62	3830.3	4419.06	3511.88	3309.44	3788.69	3771.87	419.52
2078.61	3857.36	4497.66	3482.77	3336.66	3826.21	3800.13	448.895
2080.61	3875.52	4589.56	3469.6	3366.54	3823.71	3824.99	480.521
2082.61	3875.76	4669.57	3481.49	3401.73	3798.8	3845.47	502.896
2084.61	3849.69	4762.17	3517.89	3421.89	3761.56	3862.64	532.131
2086.61	3795.25	4908.52	3551.63	3423.34	3710.2	3877.79	593.762
2088.61	3734.11	5096.65	3575.52	3412.61	3658.48	3895.47	682.01
2090.61	3658.66	5318.12	3577.35	3379.82	3614.49	3909.69	794.521
2092.6	3581.78	5468.01	3566.3	3329.11	3562.39	3901.52	881.925
2094.6	3495.95	5595.4	3529.5	3274.4	3508.64	3880.78	964.054
2096.6	3437.19	5691.77	3490.58	3244.58	3460.82	3864.99	1025.74
2098.6	3416.59	5755.66	3462.03	3246.97	3426.45	3861.54	1062.11
2100.6	3415.89	5773.98	3443.26	3263.27	3379.77	3855.23	1074.8
2102.6	3419.29	5744.04	3432.15	3287.16	3306.23	3837.77	1067.62
2104.6	3433.24	5652.33	3425.8	3302.07	3218.88	3806.47	1035.75
2106.6	3463.47	5516.62	3433.52	3332.51	3143.89	3778	979.919
2108.59	3515.51	5362.09	3460.82	3379.9	3074.87	3758.64	912.393
2110.59	3570.81	5185.27	3467.8	3419.06	3016.9	3731.97	839.208
2112.59	3614.58	5011.47	3468.45	3449.63	2991.38	3707.1	765.741
2114.59	3643.16	4856	3443.77	3481.36	2986.83	3682.22	700.012
2116.59	3651.62	4707.95	3402.09	3493.14	2999.61	3650.88	638.028
2118.59	3629.27	4548.03	3381.55	3491.3	3036.27	3617.28	564.68
2120.59	3604.72	4386.94	3368.37	3460.68	3072.6	3578.66	491.994
2122.58	3607.38	4220.8	3364.99	3400.95	3101.76	3539.18	421.32
2124.58	3599.04	4061	3345.34	3348.25	3123.1	3495.35	358.269
2126.58	3574.5	3935.93	3290.75	3293.85	3145.28	3448.06	313.929
2128.58	3550.86	3860.44	3231.25	3251.57	3166.74	3412.17	291.094
2130.58	3551.41	3805.84	3194.17	3216.64	3185.19	3390.65	278.084
2132.58	3574.76	3777.67	3169.46	3204.78	3190.48	3383.43	277.021
2134.58	3589.96	3757.72	3133.88	3201.13	3181.35	3372.81	282.196
2136.58	3591.54	3755.74	3107.18	3227.37	3178.08	3371.98	284.654
2138.57	3597.63	3794.2	3078.16	3284.3	3188.85	3388.63	298.062
2140.57	3612.43	3852.17	3083.27	3372.33	3223.33	3428.71	307.311
2142.57	3604.43	3904.6	3101.54	3489.37	3278.35	3475.66	308.08
2144.57	3576.71	3942.98	3113.61	3603.94	3333.79	3514.21	311.783
2146.57	3524.83	3952.86	3123.03	3701.61	3381.63	3536.79	314.52
2148.57	3467.01	3942.33	3162.85	3783.2	3425.65	3556.21	308.362
2150.57	3435.56	3935.44	3195.59	3848.32	3465.7	3576.12	308.201
2152.56	3432.5	3916.61	3242.11	3883.41	3491.7	3593.27	295.047
2154.56	3453.43	3872.18	3268.01	3880.94	3507.03	3596.32	270.78
2156.56	3487.22	3800.22	3283.01	3852.19	3541.7	3592.87	234.539
2158.56	3564.24	3736.35	3314.9	3783.67	3589.62	3597.76	183.692
2160.56	3686.53	3694.97	3354.94	3686.76	3666.35	3617.91	147.385
2162.56	3842.46	3671.56	3390.79	3595.89	3723.61	3644.86	168.013
2164.56	4048.29	3686.7	3411.21	3523.33	3752.7	3684.44	243.754
2166.56	4273.98	3732.96	3434.22	3472.88	3763.06	3735.42	335.582
2168.55	4467.06	3780.9	3451.27	3479.93	3730.56	3781.94	410.054
2170.55	4557.37	3815.13	3459.54	3517.17	3649.16	3799.68	445.114
2172.55	4621.53	3825.94	3470.83	3564.15	3544.54	3805.4	475.572
2174.55	4652.16	3822.6	3493.48	3612	3416.13	3799.28	500.833
2176.55	4648.63	3799.35	3501.88	3686.98	3285.23	3784.42	520.958
2178.55	4581.02	3785.24	3506.69	3770.44	3160.18	3760.71	524.111
2180.55	4470.52	3804.82	3480.61	3858.4	3038.36	3730.54	527.021
2182.54	4346.38	3845.63	3456.01	3945.39	2940.52	3706.79	532.762
2184.54	4205.39	3882.91	3464.64	4010.91	2870.79	3686.93	530.958
2186.54	4049.06	3914	3495.55	4052.74	2821.89	3666.65	524.257
2188.54	3978.43	3920.2	3530.12	4080.66	2801.04	3662.09	524.576
2190.54	3927.3	3920.25	3580.62	4072.87	2798.04	3659.82	514.517
2192.54	3873.53	3906.05	3606.61	4030.57	2804.97	3644.34	494.003
2194.54	3811.26	3864.03	3611.85	3997.56	2812.7	3619.48	471.826
2196.54	3763.45	3810.16	3589.87	3978.29	2812	3590.75	456.785
2198.53	3713.83	3777.48	3535.45	3952.05	2793.34	3554.43	450.801
2200.53	3669	3765.02	3473.51	3907.54	2771.31	3517.27	445.837
2202.53	3640.13	3799.95	3406.51	3868.75	2754.4	3493.95	450.017
2204.53	3618.67	3839.52	3351.21	3833.41	2740.07	3476.58	457.55
2206.53	3585.74	3900.2	3309.17	3801.09	2730.56	3465.35	469.204
2208.53	3543.14	3966.37	3289.09	3782.2	2731.91	3462.54	481.253
2210.53	3519.56	3999.52	3276.17	3794.48	2741.25	3466.2	489.06
2212.52	3516.34	3991.9	3275.21	3791.14	2752.58	3465.43	482.231
2214.52	3533.13	3966.62	3267.25	3753.9	2758.6	3455.9	468.353
2216.52	3547.27	3927.17	3264.22	3703.03	2774.38	3443.21	444.948
2218.52	3567.2	3911.18	3289.29	3654.52	2789.04	3442.24	427.389
2220.52	3593.98	3935.4	3317.71	3601.36	2803	3450.29	422.895
2222.52	3663.82	4008.49	3347.88	3526.64	2813.4	3472.05	440.669
2224.52	3772.04	4089.38	3366.99	3461.38	2832.13	3504.38	470.772
2226.52	3922.95	4197.48	3396.72	3416.65	2857.51	3558.26	519.326
2228.51	4161.01	4311.26	3410.32	3387.78	2894.54	3632.98	590.311
2230.51	4470.61	4397.79	3413.47	3367.6	2939.13	3717.72	680.202
2232.51	4834.7	4470.01	3429.71	3331.85	2997.59	3812.77	793.542
2234.51	5222.69	4525.73	3436.22	3301.89	3052.19	3907.74	926.332
2236.51	5513.19	4544.52	3453.43	3284.38	3080.58	3975.22	1029.48
2238.51	5675.46	4513.24	3472.7	3265.97	3090.24	4003.52	1085.7
2240.51	5767.79	4438.97	3490.61	3253.67	3097.82	4009.77	1112.17
2242.5	5803.02	4328.05	3527.35	3260.39	3086	4000.96	1114.04
2244.5	5760.14	4210.92	3575.21	3262.06	3036.95	3969.06	1094.33
2246.5	5622.98	4097.19	3617.8	3265.97	2985.1	3917.81	1039.79
2248.5	5387.07	4060.04	3653.13	3292.03	2955.12	3869.48	942.829
2250.5	5095.81	4097.37	3660.83	3319.94	2932.08	3821.21	831.926
2252.5	4783.74	4190.28	3654.66	3353.79	2906.93	3777.88	730.654
2254.5	4484.9	4306.62	3663.38	3374.29	2880.82	3742	662.141
2256.5	4341.29	4439.14	3669.63	3389.06	2866.62	3741.15	659.782
2258.49	4228.54	4507.54	3672.62	3378.26	2856.78	3728.75	660.045
2260.49	4134.12	4569.13	3715.55	3348.9	2870.39	3727.62	661.777
2262.49	4040.04	4619.15	3807.19	3343.39	2914.09	3744.77	653.213
2264.49	3976.13	4665.04	3916.32	3354.19	2963.73	3775.08	649.584
2266.49	3926.79	4696.57	3987.82	3370.59	3004.28	3797.21	646.668
2268.49	3927.48	4740.61	4045.98	3391.57	3037.56	3828.64	652.98
2270.49	3929.65	4843.53	4072.56	3403.85	3063.26	3862.57	681.943
2272.49	3923.3	5003.55	4068.68	3387.44	3088.9	3894.38	736.083
2274.48	3895.86	5237.14	4026.64	3354.19	3094.18	3921.6	828.993
2276.48	3853.38	5503.82	3962.5	3298.13	3067.59	3937.09	952.183
2278.48	3796.03	5718.8	3900.82	3240.36	3043.19	3939.84	1058.32
2280.48	3748.14	5915.51	3838.28	3199.01	3024.19	3945.03	1155.15
2282.48	3707.64	6097.01	3798.5	3161.4	3006.95	3954.3	1245.24
2284.48	3698.52	6219.25	3739.26	3134.79	3018.8	3962.13	1302.7
2286.48	3701.83	6294.68	3680.17	3149.18	3022.65	3969.71	1335.22
2288.47	3710.62	6314.73	3598.21	3182.89	3016.46	3964.58	1344.61
2290.47	3711.91	6285.67	3520.11	3227.83	3001.09	3949.32	1334.05
2292.47	3725.12	6170.4	3431.59	3298.61	2997.29	3924.6	1282.41
2294.47	3716.16	5983.93	3334.29	3381.5	2987.94	3880.77	1203.69
2296.47	3687.61	5765.42	3256.65	3459.74	2957.39	3825.36	1117.28
2298.47	3652.55	5504.46	3192.86	3537.46	2936.59	3764.79	1012.89
2300.47	3626.2	5227.39	3144.28	3592.11	2934.3	3704.85	900.696
2302.47	3606.81	4947.23	3123.46	3626.39	2923.68	3645.51	788.971
2304.46	3626.89	4706.35	3120.81	3644.43	2914.47	3602.59	693.945
2306.46	3648.94	4495.51	3153.02	3618.88	2919.27	3567.13	604.665
2308.46	3674.03	4311.09	3211.91	3573.5	2933.71	3540.85	521.751
2310.46	3682.51	4157.68	3285.19	3511.6	2956.56	3518.71	448.806
2312.46	3682.06	4029.98	3353	3452.72	2974.56	3498.47	391.774
2314.46	3691.5	3897.93	3424.28	3410.63	3007.71	3486.41	335.473
2316.46	3702.16	3797.21	3483.84	3379.48	3043.36	3481.21	296.116
2318.45	3717.61	3730.94	3546.05	3362.77	3074.7	3486.42	274.59
2320.45	3731.51	3699.57	3592.88	3370.09	3084.91	3495.79	269.789
2322.45	3727.83	3714.3	3642.69	3374.79	3093.6	3510.64	273.16
2324.45	3710.18	3746.53	3667.45	3384.25	3079.16	3517.51	283.708
2326.45	3658.98	3782.93	3682.48	3407.99	3050.45	3516.57	294.879
2328.45	3590.18	3817.56	3733.1	3436.99	3024.48	3520.46	312.771
2330.45	3528.61	3847.84	3791.11	3471.86	3005.31	3528.94	334.618
2332.45	3479.07	3855.92	3857.97	3506.12	2988.3	3537.48	357.11
2334.44	3438.01	3845.57	3924.29	3525.75	2975.59	3541.84	377.557
2336.44	3437.86	3823.23	3962.59	3538.18	2967.27	3545.82	386.357
2338.44	3481.45	3794.42	3999.42	3517.15	2968.28	3552.14	389.19
2340.44	3546.95	3765.46	4024.49	3489.48	2973.63	3560	389.53
2342.44	3642.21	3768.09	4016.71	3493.54	2979.35	3579.98	386.724
2344.44	3760.38	3796.99	3967.61	3511.24	2982.52	3603.75	383.65
2346.44	3923.75	3850.59	3882.71	3518.98	2990.66	3633.34	393.647
2348.43	4096.96	3906.67	3797.36	3514.18	3007.18	3664.47	423.671
2350.43	4280.79	3941.41	3698.93	3483.21	3007.32	3682.33	479.8
2352.43	4414.27	3944.12	3611.77	3461.89	2988.44	3684.1	533.694
2354.43	4476.97	3921.37	3536.4	3472.69	2959.11	3673.31	564.909
2356.43	4517.93	3878.1	3489.98	3504	2921.83	3662.37	587.734
2358.43	4530.65	3847.98	3429.61	3533.38	2882.27	3644.78	605.431
2360.43	4515.43	3818.14	3377.15	3547.1	2857.83	3623.13	609.549
2362.43	4450.3	3815.38	3348.21	3535.98	2829.79	3595.93	597.921
2364.42	4354.17	3837.38	3332.53	3495.66	2810.44	3566.03	575.583
2366.42	4252.6	3863.76	3326.3	3427.6	2806.17	3535.29	549.847
2368.42	4151.85	3897.31	3317.23	3372.58	2815.24	3510.84	524.575
2370.42	4088.35	3933.99	3333.53	3353.56	2813.37	3504.56	513.572
2372.42	4041.05	3949.77	3369.96	3360.93	2811.17	3506.57	501.387
2374.42	3982.38	3961.87	3446.51	3374.92	2821.35	3517.41	480.515
2376.42	3929.25	3960.74	3553.3	3384.78	2826.69	3530.95	464.009
2378.41	3872.95	3956.67	3683.86	3414.66	2837.17	3553.06	451.109
2380.41	3801.45	3974.94	3831.91	3465.73	2860.23	3586.85	447.039
2382.41	3730.37	4046.24	3994.34	3519.46	2891.82	3636.45	467.173
2384.41	3684.47	4174.47	4119.54	3562.37	2923.35	3692.84	505.779
2386.41	3656.07	4324.22	4188.91	3585.51	2940.66	3739.07	550.61
2388.41	3627.29	4481.18	4206.94	3590.35	2962.6	3773.67	591.855
2390.41	3627.37	4601.25	4174.64	3562.77	2979.27	3789.06	620.773
2392.41	3646.65	4680.06	4091.48	3510.19	2991.96	3784.07	636.127
2394.4	3682.69	4734.51	3959.75	3461.15	2992.94	3766.21	646.732
2396.4	3754.58	4762.31	3825.13	3421.29	2989.81	3750.62	655.053
2398.4	3852.23	4747.77	3701.16	3390.66	2997.63	3737.89	652.463
2400.4	3934.11	4686.67	3655.1	3362.2	2997.52	3727.12	639.19
2402.4	3982.59	4606.5	3612.88	3343.2	2977.53	3704.54	624.173
2404.4	3994.1	4539.81	3546.98	3312.9	2972.98	3673.35	610.335
2406.4	3980.1	4494.45	3491.65	3285.18	2981.97	3646.67	597.167
2408.39	3964.66	4464.99	3453.29	3254.64	2965.2	3620.56	596.414
2410.39	3940.53	4406.96	3414.36	3227.83	2944.05	3586.75	585.131
2412.39	3925.25	4319.16	3397.36	3213.76	2898.96	3550.9	568.467
2414.39	3908.95	4235.57	3417.12	3200.88	2852.22	3522.95	552.638
2416.39	3899.71	4180.89	3460.36	3208.76	2815.73	3513.09	542.479
2418.39	3895.25	4155.69	3547.15	3221.82	2779.6	3519.9	543.773
2420.39	3880.58	4121.35	3679.12	3236.93	2741.59	3531.91	548.247
2422.39	3860.36	4063.01	3832.07	3239.55	2724.81	3543.96	551.406
2424.38	3803.87	3979.85	4023.28	3247.4	2717.62	3554.4	560.702
2426.38	3730.37	3902.07	4225.51	3265.47	2722.78	3569.24	586.558
2428.38	3671.13	3827.56	4410.6	3279.26	2733.34	3584.38	625.834
2430.38	3629.88	3773.79	4587.96	3322.27	2744.49	3611.68	673.705
2432.38	3598.84	3730.07	4701.73	3363.68	2764	3631.66	703.646
2434.38	3578.17	3695.55	4741.37	3405.06	2776.49	3639.33	710.768
2436.38	3556.84	3671.03	4736.22	3440.56	2783.26	3637.58	704.154
2438.37	3546.92	3643.78	4672.18	3468.51	2798.31	3625.94	672.856
2440.37	3524.19	3644.06	4582.09	3527.81	2801.81	3615.99	635.064
2442.37	3491.32	3639.9	4471.37	3617.06	2796.33	3603.2	595.569
2444.37	3463.46	3628.36	4324.55	3709.34	2792.39	3583.62	549.378
2446.37	3430.3	3641.37	4159.64	3801.88	2785.1	3563.66	510.37
2448.37	3396.29	3683.02	4031.75	3855.96	2784.93	3550.39	487.943
2450.37	3354.94	3752.37	3944.47	3876.38	2789.94	3543.62	479.222
2452.37	3329.3	3829.93	3911.11	3861.83	2793.27	3545.09	481.46
2454.36	3330.2	3905.11	3896.55	3799.18	2801.44	3546.5	478.771
2456.36	3343.29	3970.86	3879.17	3703.27	2813.52	3542.02	472.701
2458.36	3360.3	4024.09	3880.8	3624.24	2815.59	3541	478.185
2460.36	3386.46	4063.83	3872.75	3574.73	2800.38	3539.63	489.116
2462.36	3434.34	4115.39	3861.1	3575.68	2767.01	3550.7	510.774
2464.36	3495.51	4159.75	3831.21	3600.96	2717.26	3560.94	536.025
2466.36	3561.81	4188.3	3803.4	3636	2667.95	3571.49	560.107
2468.35	3633.6	4183.76	3810.36	3709.3	2635.35	3594.48	576.302
2470.35	3713.59	4159.17	3847.07	3831.29	2614.19	3633.06	592.973
2472.35	3793.68	4150.14	3926.5	4005.88	2605.14	3696.27	623.478
2474.35	3861.78	4124.37	3997.81	4221.89	2617.35	3764.64	655.47
2476.35	3930.82	4102.52	4061.61	4462.1	2643.99	3840.21	697.089
2478.35	3955.66	4111.09	4112.21	4691.15	2672.37	3908.5	745.873
2480.35	3952.68	4125.05	4141.72	4899.15	2692.65	3962.25	798.197
2482.35	3929.38	4146.16	4134.25	5065.78	2720.02	3999.12	839.435
2484.34	3908.48	4162.68	4109.35	5199.23	2755.01	4026.95	870.532
2486.34	3927.84	4169.26	4093.64	5287.84	2793	4054.32	886.459
2488.34	4010.86	4205.49	4058.72	5316.36	2835.19	4085.33	880.195
2490.34	4144.18	4271.62	3993.69	5275.34	2874.25	4111.82	855.263
2492.34	4309.25	4358.57	3915.2	5170.28	2900.74	4130.81	825.193
2494.34	4489.35	4407.01	3844.97	5023.55	2913.84	4135.74	800.692
2496.34	4663.81	4433.33	3777.94	4849.75	2908.8	4126.73	792.184
2498.33	4726.82	4437.02	3728.57	4633.66	2867.06	4078.63	782.157
2500.33	4756.6	4424.3	3673.91	4428.81	2816.94	4020.11	781.071
2502.33	4747.13	4419.47	3602.39	4244.71	2792.89	3961.32	774.883
2504.33	4700.36	4404.02	3503.13	4080.27	2792.24	3896	760.207
2506.33	4579.26	4396.6	3409.68	3943.38	2804.8	3826.75	728.515
2508.33	4398.48	4362.09	3345.42	3846.16	2813.18	3753.07	679.281
2510.33	4193.25	4296.67	3319.68	3761.58	2804.54	3675.14	621.793
2512.33	3974.34	4206.57	3332.52	3692.76	2786.11	3598.46	559.155
2514.32	3786.25	4122.66	3353.01	3644.95	2770.64	3535.5	509.393
2516.32	3711.22	4044.26	3361.92	3632.48	2743.2	3498.61	487.388
2518.32	3686.3	3991.41	3356.67	3637.08	2724.73	3479.24	478.125
2520.32	3678.81	3926.26	3333.41	3661.63	2717.37	3463.5	467.277
2522.32	3685.23	3857	3286.79	3684.11	2711.5	3444.93	460.349
2524.32	3717.79	3808.85	3241.89	3698.99	2720.07	3437.52	457.66
2526.32	3769.35	3777.91	3214.13	3694.34	2730.74	3437.29	458.633
2528.31	3822.3	3757.93	3206.29	3665.51	2743.92	3439.19	457.502
2530.31	3894.19	3737.89	3203.35	3606.51	2758.03	3439.99	459.302
2532.31	3961.49	3731.97	3185.83	3542.31	2760.99	3436.52	472.563
2534.31	4023.99	3719.81	3177.33	3488.32	2755.25	3432.94	489.721
2536.31	4055.29	3714.58	3174.25	3438.73	2762.92	3429.15	495.592
2538.31	4072.47	3694.14	3169.79	3390.58	2790.67	3423.53	489.983
2540.31	4067.56	3677.64	3189.27	3360.43	2805.79	3420.14	479.518
2542.31	4032.89	3680.78	3217.39	3341.09	2834.69	3421.37	456.481
2544.3	3954.98	3672.75	3277.9	3344.19	2881.11	3426.19	408.115
2546.3	3860.84	3678.97	3344.17	3365.06	2923.18	3434.44	359.154
2548.3	3787.73	3690.83	3413.57	3390.68	2947.95	3446.15	327.449
2550.3	3735.61	3689.53	3486.95	3399.22	2967.66	3455.8	306.34
2552.3	3744.91	3705.96	3547.57	3418.34	2962.06	3475.77	315.346
2554.3	3738.05	3719.89	3619.14	3451.84	2933.15	3492.42	332.628
2556.3	3715.88	3727.39	3682.47	3488.38	2897.15	3502.25	351.831
2558.29	3665.3	3760.17	3738.61	3512.97	2872.28	3509.87	369.346
2560.29	3601.65	3791.6	3779.46	3527.6	2866.84	3513.43	378.883
2562.29	3551.65	3818.92	3809.15	3509.08	2863.39	3510.44	388.831
2564.29	3512.19	3850	3859.64	3481.82	2847.63	3510.26	411.516
2566.29	3500.32	3902.05	3919.06	3446.58	2837.67	3521.14	440.613
2568.29	3515.42	3969.2	3963.53	3399.08	2825.18	3534.48	472.987
2570.29	3557.87	4033.2	3977.77	3380.81	2799.54	3549.84	502.084
2572.29	3622.3	4105.57	3955.22	3376.53	2763.06	3564.54	530.659
2574.28	3689.88	4220.94	3886.96	3374.25	2728.96	3580.2	566.504
2576.28	3765.62	4369.57	3759.64	3377.42	2696.05	3593.66	614.737
2578.28	3852.26	4582.73	3604.84	3394.23	2670.26	3620.86	695.342
2580.28	3972.4	4863.23	3464.46	3401.13	2655.41	3671.33	815.347
2582.28	4139.97	5219.29	3352.27	3392.62	2646.85	3750.2	976.44
2584.28	4335.37	5587.59	3299.6	3390.68	2636.86	3850.02	1144.6
2586.28	4518.85	5868.05	3242.63	3387.81	2632.25	3929.92	1279.98
2588.27	4677.3	6066.64	3218.54	3391.79	2641.29	3999.11	1374.45
2590.27	4823.65	6234.67	3236.66	3382.17	2662.07	4067.85	1449.45
2592.27	4923.17	6327.3	3268.04	3349.12	2702.53	4114.03	1487.14
2594.27	4978.82	6288.03	3295.93	3316.52	2755.88	4127.04	1468.26
2596.27	4989.23	6147.85	3318.78	3308.64	2805.5	4114	1404.96
2598.27	4951.46	5932.62	3335.61	3312.34	2842.66	4074.94	1310.15
2600.27	4842.69	5662.12	3329.44	3311.38	2862.04	4001.53	1192.85
2602.27	4683.34	5348.95	3317.54	3335.71	2873.3	3911.77	1051.69
2604.26	4501.52	5048.92	3330.03	3368.42	2869.44	3823.67	911.348
2606.26	4310.72	4868.42	3342.4	3399.76	2863.7	3757	812.306
2608.26	4134.69	4698.81	3332.02	3438.3	2851.42	3691.05	726.321
2610.26	3996.64	4547.81	3320.54	3460.15	2833.07	3631.64	658.88
2612.26	3904.99	4409.38	3347.12	3476.57	2814.52	3590.51	600.799
2614.26	3827.54	4286.49	3389.79	3467.49	2804.12	3555.09	549.577
2616.26	3769.17	4175.87	3422.69	3453.04	2790.23	3522.2	509.594
2618.25	3711.13	4121.32	3454.16	3466.76	2773.89	3505.45	490.129
2620.25	3665.44	4114.23	3490.97	3486.51	2766.42	3504.71	485.524
2622.25	3636.7	4101.67	3532.94	3529.57	2754.18	3511.01	484.327
2624.25	3616.68	4093.13	3557.46	3597.4	2734.23	3519.78	490.577
2626.25	3599.25	4073.81	3574.47	3688.88	2707.27	3528.74	501.155
2628.25	3566.81	4041.75	3562.96	3770.47	2690.31	3526.46	506.747
2630.25	3548.77	4017.9	3547.48	3830.87	2681.4	3525.28	512.161
2632.25	3548.62	3994.64	3571.26	3866.65	2680.93	3532.42	512.875
2634.24	3564.62	3972.3	3638.96	3877.16	2687.6	3548.13	509.219
2636.24	3588.37	3932.13	3735.31	3847.41	2697.87	3560.22	498.971
2638.24	3611.19	3880.49	3870.85	3783.76	2727.65	3574.79	485.732
2640.24	3634.62	3850.14	4009.64	3709.12	2782.21	3597.15	477.551
2642.24	3642.47	3849.08	4147.12	3624.92	2870.99	3626.92	472.13
2644.24	3624.9	3840.84	4291.04	3545.27	2978.29	3656.07	476.96
2646.24	3587.13	3827.38	4421.86	3475.87	3104.89	3683.43	488.127
2648.23	3540.58	3805.15	4534.08	3439.97	3207.16	3705.39	510.521
2650.23	3500.31	3795.89	4595.56	3424.55	3289.24	3721.11	522.845
2652.23	3462.24	3791.13	4607.76	3414.47	3344.79	3724.08	522.891
2654.23	3466.3	3805.18	4563.3	3399.17	3373.23	3721.44	501.484
2656.23	3480.44	3802.34	4453.09	3382.37	3361.92	3696.03	458.512
2658.23	3485.9	3805.82	4267.39	3360.81	3324.41	3648.87	394.337
2660.23	3487.59	3821.81	4044.7	3344.49	3275.11	3594.74	327.986
2662.23	3499.67	3827.79	3820.52	3330.65	3236.44	3543.01	273.44
2664.22	3510.38	3852.3	3633.2	3322.96	3207.67	3505.3	254.277
2666.22	3509.16	3892.45	3503.49	3321.01	3214.1	3488.04	258.445
2668.22	3502.99	3927.14	3390.11	3320.45	3255.3	3479.2	266.686
2670.22	3504.27	3946.63	3314.27	3343.14	3288.76	3479.42	274.363
2672.22	3498.59	3970.17	3251.96	3352.44	3346.4	3483.91	285.772
2674.22	3492.41	4010.96	3202.27	3361.08	3438.62	3501.07	305.304
2676.22	3496.03	4043.41	3151.43	3377.8	3530.92	3519.92	328.144
2678.21	3497.74	4057.64	3121.43	3369.04	3618.25	3532.82	346.42
2680.21	3498.47	4083.93	3098.02	3342.96	3685.21	3541.72	371.761
2682.21	3500.69	4116.74	3080.25	3321.91	3714.31	3546.78	394.732
2684.21	3486.33	4181.95	3100.26	3303.18	3704.98	3555.34	415.476
2686.21	3452.96	4248.24	3135.06	3278.2	3655.61	3554.02	434.187
2688.21	3415.49	4303.41	3160.3	3232.13	3545.87	3531.44	457.415
2690.21	3375.96	4344.82	3196.68	3200.34	3401.56	3503.87	479.718
2692.21	3343.14	4361.39	3222.52	3181.79	3256.88	3473.14	500.088
2694.2	3340.46	4353.4	3244.94	3191.29	3109.99	3448.02	513.004
2696.2	3343.34	4310.14	3298.64	3211.67	3012.97	3435.35	505.185
2698.2	3345.52	4224.7	3378.68	3223.93	2962.18	3427	475.027
2700.2	3359.12	4123.02	3432.49	3219.23	2939.69	3414.71	438.455
2702.2	3360.58	4022.77	3467.99	3198.43	2929.24	3395.8	405.02
2704.2	3358.74	3931.9	3481.79	3194.74	2930.12	3379.46	371.521
2706.2	3344.47	3890.16	3462.35	3196.46	2922.95	3363.28	356.893
2708.19	3339.28	3882.21	3408.56	3215.04	2919.59	3352.94	350.076
2710.19	3346.89	3873.79	3355.98	3235.92	2909.29	3344.38	346.946
2712.19	3368.2	3882.3	3332.34	3251.67	2893.95	3345.69	354.101
2714.19	3375.87	3910	3316.07	3274.36	2886.16	3352.49	366.15
2716.19	3392.53	3943.59	3282.9	3294.93	2871.16	3357.03	384.295
2718.19	3426.62	3967.51	3270.27	3301.44	2853.36	3363.84	400.499
2720.19	3457.08	3964.36	3267.38	3308.8	2829.94	3365.51	408.255
2722.19	3487.42	3937.5	3276.45	3310.05	2798.78	3362.04	410.541
2724.18	3518	3892.19	3283.27	3311.94	2759.9	3353.06	411.178
2726.18	3560.19	3856.8	3284.2	3320.58	2714.99	3347.35	421.137
2728.18	3585.87	3814.94	3294.58	3318.81	2674.27	3337.69	427.697
2730.18	3610.05	3798.64	3290.06	3328.06	2642.56	3333.87	439.362
2732.18	3642.71	3790.03	3255.1	3327.13	2630.66	3329.13	448.358
2734.18	3676.83	3796.87	3224.36	3303.87	2634.6	3327.3	456.52
2736.18	3699.39	3834.56	3216.98	3294.49	2652.27	3339.54	464.736
2738.17	3697.45	3879.37	3199.63	3313.31	2674.28	3352.81	469.43
2740.17	3670.58	3920.92	3186.96	3325.74	2696.03	3360.04	469.857
2742.17	3633.91	3964.18	3208.75	3330.89	2713.56	3370.26	469.346
2744.17	3596.41	4023.65	3255.66	3362.49	2726.93	3393.03	475.013
2746.17	3572.81	4086.68	3288.61	3388.72	2740.77	3415.52	486.649
2748.17	3567.63	4151.57	3304.15	3414.77	2756.32	3438.89	502.277
2750.17	3554.45	4227.93	3300.55	3456.97	2775.55	3463.09	522.612
2752.17	3555.63	4294.75	3303.36	3505.66	2807.5	3493.38	536.832
2754.16	3576.66	4366.74	3313.22	3574.25	2860	3538.17	547.686
2756.16	3601.49	4430.32	3319.4	3627.42	2922.75	3580.28	553.546
2758.16	3655.73	4470.77	3358.67	3658.55	2979.29	3624.6	548.924
2760.16	3760.93	4467.8	3398.07	3668.14	3022.85	3663.56	533.221
2762.16	3890.83	4435.95	3439.45	3648.82	3042.56	3691.52	519.713
2764.16	4011.51	4358.91	3458.22	3631.71	3036.23	3699.32	508.651
2766.16	4102.91	4254.72	3463.5	3599.18	3002.47	3684.56	505.345
2768.15	4155.61	4161.31	3472.26	3549.09	2946.98	3657.05	513.039
2770.15	4144.36	4087.58	3475.68	3515.66	2882.07	3621.07	517.166
2772.15	4095.76	4036.9	3490.39	3506.88	2842.93	3594.57	507.529
2774.15	4007.59	3997.8	3495.32	3504.27	2830.94	3567.18	482.33
2776.15	3911.51	3966.47	3472.23	3490.27	2839.14	3535.92	452.239
2778.15	3818.14	3939.88	3411.65	3453.22	2865.98	3497.77	420.315
2780.15	3739.88	3903.45	3301.7	3407.96	2923.76	3455.35	384.12
2782.15	3689.68	3841.12	3178.47	3393.71	2994.67	3419.53	350.001
2784.14	3655.91	3779.86	3080.74	3404.68	3067.15	3397.67	324.998
2786.14	3604.93	3760.15	3015.48	3431.18	3140.57	3390.46	311.201
2788.14	3544	3776.14	2974.44	3477.42	3201.43	3394.69	311.691
2790.14	3497.04	3802.35	2958.9	3534.85	3244.51	3407.53	319.352
2792.14	3464.88	3824.36	2961.68	3598.96	3276.7	3425.32	327.111
2794.14	3454.49	3873.27	2956.69	3674.55	3270.99	3446	355.288
2796.14	3457.33	3942.42	2966.72	3740.59	3242.38	3469.88	387.835
2798.13	3481.98	4021.48	2992.87	3795.29	3202.32	3498.79	419.895
2800.13	3524.21	4126.59	3024.59	3849.42	3149.14	3534.79	463.239
2802.13	3567.98	4209.53	3082.29	3880.56	3074.72	3563.02	497.082
2804.13	3606.48	4295.17	3145.47	3884.18	3006.34	3587.53	529.696
2806.13	3658.31	4390.45	3202.19	3854.83	2946.55	3610.47	565.212
2808.13	3697.53	4486.99	3272.41	3793.54	2893.77	3628.85	599.089
2810.13	3714.98	4578.33	3367.37	3722.26	2845.37	3645.66	632.149
2812.13	3708.4	4695.89	3484.01	3650.53	2809.34	3669.63	676.322
2814.12	3675.32	4836.82	3602.56	3603.04	2779.16	3699.38	734.814
2816.12	3639.47	4961.84	3714.19	3579.42	2752.53	3729.49	791.198
2818.12	3595.7	5035.52	3788.71	3576.73	2739.15	3747.16	826.085
2820.12	3557.81	5060.48	3795.66	3590.22	2758.21	3752.47	831.492
2822.12	3527.94	5051.55	3766.57	3589.73	2811.09	3749.37	814.072
2824.12	3514.44	4999.82	3691.7	3566.98	2880.08	3730.61	776.098
2826.12	3495.6	4931.76	3605.04	3535.19	2958.32	3705.18	732.317
2828.11	3484.91	4838.96	3534.49	3492.28	3050.99	3680.33	676.999
2830.11	3478.18	4701.95	3489.45	3460.13	3123.39	3650.62	607.302
2832.11	3479.81	4562.35	3438.42	3429.53	3167.23	3615.47	543.56
2834.11	3468.38	4435.56	3387.93	3390.89	3181.53	3572.86	493.866
2836.11	3452.66	4339.2	3374.36	3378.77	3164.97	3541.99	458.368
2838.11	3474.48	4282.18	3356.51	3379.32	3104.98	3519.49	447.705
2840.11	3540.94	4266.13	3339.15	3369.58	3014.22	3506	465.647
2842.11	3616.03	4275.15	3352.71	3365.08	2930.7	3507.94	494.47
2844.1	3698.83	4300.27	3381.41	3364.8	2854.33	3519.93	530.848
2846.1	3812.42	4344.4	3413.43	3379.42	2811.29	3552.19	568.627
2848.1	3921.78	4396.92	3434.93	3399.01	2802.81	3591.09	600.287
2850.1	3988.47	4490.72	3444.54	3432.84	2828.9	3637.09	629.309
2852.1	4027.66	4661.11	3453.64	3469.44	2854.47	3693.26	681.843
2854.1	4032.07	4877.36	3460.8	3493.46	2877.08	3748.15	751.985
2856.1	3996.46	5087.11	3490.57	3504.89	2897	3795.21	820.578
2858.09	3914.84	5218.4	3533.39	3536.12	2912.64	3823.08	858.854
2860.09	3817.21	5292.37	3566.03	3568.59	2923.05	3833.45	880.227
2862.09	3745.09	5318.39	3582.46	3603.63	2944.43	3838.8	883.018
2864.09	3719.99	5283.71	3572.79	3673.53	2970.77	3844.16	859.255
2866.09	3735.53	5186.35	3567.33	3747.72	2993.26	3846.04	809.819
2868.09	3778.64	5018.31	3552.86	3823.91	3009.1	3836.57	735.734
2870.09	3844.32	4819.04	3530.75	3884.9	3008.9	3817.58	660.379
2872.09	3887.66	4615.8	3503.31	3917.86	2990.07	3782.94	597.843
2874.08	3917.8	4447.64	3492.15	3925.92	2946.25	3745.95	560.855
2876.08	3940.97	4381.18	3480.38	3906.02	2903.31	3722.37	557.89
2878.08	3956.06	4314.68	3474.98	3844.49	2848.98	3687.84	556.42
2880.08	3942.76	4262.29	3471.67	3752.62	2812.23	3648.32	548.813
2882.08	3910.94	4197.76	3463.55	3670.18	2801.14	3608.71	528.05
2884.08	3884.94	4121.28	3484.22	3589.12	2797.79	3575.47	501.742
2886.08	3863.67	4074.3	3509.03	3550.85	2798.44	3559.26	484.605
2888.07	3844.19	4055.67	3511.19	3551.41	2800.9	3552.67	475.624
2890.07	3802.89	4065.27	3496.2	3594.78	2797.82	3551.39	474.373
2892.07	3759.01	4097.28	3452.89	3637.97	2788.08	3547.05	484.986
2894.07	3703.12	4150.88	3373.87	3659.46	2777.95	3533.06	505.501
2896.07	3644.53	4236.42	3297.36	3658.49	2771.61	3521.68	537.957
2898.07	3621.49	4355.24	3244.72	3634.95	2762.34	3523.75	585.423
2900.07	3629.83	4502.37	3224.61	3577.86	2743.39	3535.61	646.071
2902.07	3679.57	4683.8	3217.32	3513.5	2720.74	3562.99	724.761
2904.06	3741.93	4933.73	3222.71	3466.48	2702.25	3613.42	831.297
2906.06	3795.76	5214.6	3227.22	3433.33	2687.21	3671.62	951.253
2908.06	3804.15	5410.85	3237.46	3421.2	2673.67	3709.47	1034.7
2910.06	3802.56	5523.16	3282.06	3413.42	2672.11	3738.66	1077.07
2912.06	3793.1	5598.64	3338.57	3393.32	2691.32	3762.99	1099.52
2914.06	3753.18	5633.52	3400	3375.42	2716.74	3775.77	1103.94
2916.06	3676.88	5623.18	3457.95	3359.5	2737.08	3770.92	1092.67
2918.05	3604.27	5539.02	3507.41	3325.19	2765.7	3748.32	1052.38
2920.05	3543.64	5407.07	3551.87	3290.41	2804.14	3719.43	991.077
2922.05	3510.99	5249.67	3619.37	3274.18	2846.24	3700.09	915.686
2924.05	3507.31	5060.75	3674.21	3254.53	2883.3	3676.02	829.456
2926.05	3496.6	4859.76	3721.13	3244.85	2912.66	3647	741.599
2928.05	3467.11	4656.28	3764.97	3244.76	2930.57	3612.74	658.429
2930.05	3424.04	4458.32	3833.79	3263.93	2934.05	3582.82	586.792
2932.05	3370.55	4269.21	3939.95	3274.68	2925.03	3555.88	540.31
2934.04	3318.24	4087.5	4074.21	3274.89	2900.88	3531.14	527.422
2936.04	3274.7	3965.1	4239.38	3268.14	2871.81	3523.82	561.092
2938.04	3257.97	3893.97	4402.4	3264.51	2853.72	3534.51	611.414
2940.04	3245.87	3826.22	4556.89	3283.65	2836.97	3549.92	663.698
2942.04	3254.41	3749.87	4707.62	3309.41	2821.41	3568.54	716.663
2944.04	3273.37	3681.37	4813.6	3348.65	2811.89	3585.77	753.23
2946.04	3308.61	3613.35	4878.47	3382.42	2806.57	3597.88	774.016
2948.03	3348.9	3553.99	4883.81	3428.46	2793.37	3601.71	773.531
2950.03	3393.17	3522.25	4840.19	3491.47	2789.02	3607.22	751.018
2952.03	3426.55	3515.05	4742.76	3532.22	2786.28	3600.57	708.858
2954.03	3441.77	3514.68	4594.05	3548.75	2788.4	3577.53	647.928
2956.03	3442.57	3518.81	4416.24	3543.07	2782.72	3540.68	581.208
2958.03	3439.37	3536.49	4243.98	3507.15	2766.57	3498.71	523.565
2960.03	3461.96	3556.77	4096.49	3471.22	2743.31	3465.95	481.686
2962.03	3486.35	3589.9	3952.89	3448.48	2729.31	3441.38	445.202
2964.02	3508.96	3615.35	3811.97	3442.43	2721.63	3420.07	414.712
2966.02	3540.91	3642.47	3703.63	3472.57	2716.53	3415.22	400.646
2968.02	3572.85	3697.7	3634.57	3502.35	2714.44	3424.38	403.429
2970.02	3582.85	3757.01	3593.87	3514.59	2707.11	3431.08	414.387
2972.02	3568.28	3817.52	3579.09	3510.41	2695.26	3434.11	429.461
2974.02	3531.45	3861.99	3558.15	3484.54	2695.1	3426.24	434.83
2976.02	3485.21	3899.32	3524.3	3427.59	2692.78	3405.84	439.54
2978.01	3457.29	3950.27	3477.46	3363.37	2690.81	3387.84	451.565
2980.01	3461.51	3993.71	3424.79	3327.05	2687.68	3378.95	465.671
2982.01	3483.39	4041.3	3393.83	3313.9	2690.02	3384.49	481.805
2984.01	3493.91	4100.15	3388.18	3307.95	2706.17	3399.27	497.254
2986.01	3495.21	4140.65	3387.57	3301.21	2722.18	3409.36	506.593
2988.01	3513.38	4182.31	3380.59	3303.79	2735.19	3423.05	518.126
2990.01	3525.4	4201.52	3363.97	3303.4	2745.18	3427.89	522.896
2992.01	3531.35	4200.78	3325.83	3285.99	2750.36	3418.86	523.75
2994	3517.34	4219.73	3303.29	3264.02	2748.19	3410.51	533.356
2996	3508.33	4254.92	3291.29	3271.71	2736.6	3412.57	550.05
2998	3502.63	4271.27	3285.5	3290.59	2734.16	3416.83	556.024
3000	3513.11	4263.51	3288.08	3296.82	2738.39	3419.98	551.667
3002	3520.74	4221.78	3290.19	3313.69	2746.8	3418.64	532.527
3004	3526	4162.25	3300.96	3323.93	2748.32	3412.29	509.025
3006	3541.71	4112.64	3317.88	3308.03	2750.47	3406.14	491.13
3007.99	3541.31	4065.27	3315.61	3281.19	2755.92	3391.86	473.892
3009.99	3532.45	4014.25	3303.78	3269.94	2757.84	3375.65	455.639
3011.99	3532.19	3984.58	3262.76	3292.32	2762.99	3366.97	444.399
3013.99	3529.38	3964.8	3198.81	3329.44	2774.35	3359.36	437.141
3015.99	3524.65	3960.8	3138.15	3370.06	2775.47	3353.83	441.267
3017.99	3507.34	3971.6	3096.91	3399.07	2778.87	3350.76	448.271
3019.99	3470.14	3996.57	3088.4	3409.37	2780.77	3349.05	455.101
3021.99	3436.47	4022.15	3090.03	3393.87	2775.75	3343.65	463.229
3023.98	3414.37	4045.57	3090.89	3381.28	2768.1	3340.04	472.808
3025.98	3413.3	4057.94	3109.86	3386.55	2761.08	3345.75	477.211
3027.98	3415.15	4050.93	3152.93	3361.26	2757.04	3347.46	470.659
3029.98	3443.21	4025.75	3218.47	3309.21	2743.7	3348.07	461.486
3031.98	3485.75	4025.59	3289.69	3269.21	2736.87	3361.42	463.76
3033.98	3569.66	4065.52	3362.78	3237.13	2737.09	3394.44	484.488
3035.98	3676.63	4121.37	3439.7	3218.17	2731.34	3437.44	517.6
3037.97	3769.64	4153.39	3509.07	3205.68	2730.21	3473.6	542.086
3039.97	3887.47	4161.5	3567.19	3216.6	2740.67	3514.69	558.581
3041.97	4043.34	4150.27	3627.21	3225.62	2761.89	3561.66	577.782
3043.97	4245.3	4102.49	3689.87	3220.31	2795.59	3610.71	605.733
3045.97	4492.2	4030.91	3731.28	3217.89	2846.21	3663.7	650.549
3047.97	4820.16	3968.04	3755.35	3235.55	2887.22	3733.26	741.697
3049.97	5223.97	3899.65	3761.36	3257.67	2910.73	3810.68	883.668
3051.97	5702.67	3829.23	3774.08	3271.9	2925.56	3900.69	1074.07
3053.96	6267.99	3757.66	3768.17	3266.6	2903.78	3992.84	1322.46
3055.96	6882.13	3698.64	3720.66	3263.72	2865.43	4086.12	1602.17
3057.96	7473.8	3672.74	3652.72	3281.2	2835.83	4183.26	1870.76
3059.96	8036.25	3660.03	3573.34	3300.01	2830.46	4280.02	2124.54
3061.96	8503.46	3641.04	3480.22	3327.58	2819.09	4354.28	2339.84
3063.96	8927.73	3623.21	3379.78	3351.45	2815.12	4419.46	2537.42
3065.96	9345.47	3599.52	3293.43	3368.88	2818.53	4485.17	2731.8
3067.95	9785.36	3578.52	3235.74	3390.83	2826.77	4563.44	2932.25
3069.95	10217.6	3578.92	3211.94	3413.23	2836.68	4651.67	3123.73
3071.95	10619.6	3576.52	3187.72	3431.58	2853.81	4733.84	3301.59
3073.95	10988.4	3569.07	3156.8	3480.32	2870.92	4813.1	3463.15
3075.95	11316.5	3576.97	3151.48	3545.83	2883.86	4894.93	3601.32
3077.95	11486.4	3596.64	3157.78	3620.13	2882.29	4948.65	3667.83
3079.95	11629.8	3589.29	3186.69	3704.82	2856.69	4993.45	3725.02
3081.95	11705.5	3580.38	3213.04	3775.34	2831.87	5021.23	3754.03
3083.94	11691.3	3577.24	3231.05	3814.9	2805.23	5023.94	3746.5
3085.94	11572.4	3571.51	3221.37	3813.28	2771.83	4990.08	3700.44
3087.94	11366.2	3551.91	3181.36	3775.51	2750.7	4925.13	3621.57
3089.94	11099.3	3534.6	3126.1	3697.28	2737.87	4839.03	3519.41
3091.94	10742.2	3535.32	3086.63	3613.94	2736.79	4742.97	3372.39
3093.94	10297.1	3562.35	3051.4	3537.53	2747.85	4639.25	3181.33
3095.94	9823.3	3607.68	3041.56	3456.67	2779.96	4541.84	2970.65
3097.93	9271.35	3667.44	3044.41	3380.65	2824.18	4437.61	2721.19
3099.93	8669.48	3716.69	3062.21	3323.09	2865.43	4327.38	2448.13
3101.93	7962.07	3755.23	3071.57	3292.44	2897.16	4195.7	2129.87
3103.93	7337.4	3782.67	3071.71	3271.39	2915.74	4075.78	1852.36
3105.93	6681.1	3790.82	3089.16	3262.37	2915.41	3947.77	1562.73
3107.93	6082.46	3809.12	3097.25	3260.05	2887.1	3827.2	1306.21
3109.93	5563.46	3815.01	3114.51	3264.06	2858.88	3723.18	1086.67
3111.93	5187.94	3795.8	3135.94	3263.6	2836.78	3644.01	930.217
3113.92	4964.71	3757.44	3133.82	3289.41	2821.76	3593.43	837.626
3115.92	4798.34	3734.61	3125.2	3321.95	2812.22	3558.46	769.553
3117.92	4640.58	3720.19	3154.4	3354.95	2811.93	3536.41	699.409
3119.92	4497.88	3724.77	3200.16	3382.69	2818.64	3524.83	634.65
3121.92	4377.2	3738.76	3246.97	3391.43	2824.35	3515.74	582.573
3123.92	4242.46	3745.34	3284.06	3408.56	2837.56	3503.6	525.641
3125.92	4112.29	3777.81	3306.55	3446.59	2842.7	3497.19	480.717
3127.91	4024.45	3863.91	3316.74	3487.8	2857	3509.98	462.106
3129.91	3978.16	3986.64	3346.48	3524.13	2873.53	3541.79	467.265
3131.91	3969.52	4155.54	3380.74	3550.58	2887.82	3588.84	500.568
3133.91	4009.21	4369.15	3413.77	3554.72	2883.5	3646.07	569.767
3135.91	4120.25	4617.94	3454.76	3538.9	2856.53	3717.68	673.648
3137.91	4287.03	4848.17	3482.82	3536.54	2823.9	3795.69	783.99
3139.91	4507.59	5065.65	3522.92	3549.76	2803.24	3889.83	893.745
3141.91	4794.71	5269.39	3596.08	3566.83	2782.3	4001.86	1009.51
3143.9	5162.89	5441.61	3678.94	3583.11	2774.53	4128.22	1132.14
3145.9	5513.58	5568.88	3747.1	3614.03	2769.08	4242.53	1243.61
3147.9	5845.1	5651.72	3774.49	3644.67	2754.16	4334.03	1351.29
3149.9	6171.36	5650.55	3778.57	3647.77	2734.62	4396.58	1451.47
3151.9	6452.18	5591.21	3750.61	3617.77	2726.39	4427.63	1537.95
3153.9	6674.63	5471.58	3681.25	3550.84	2732.48	4422.16	1607.65
3155.9	6873.15	5322.18	3568.87	3450.18	2745.33	4391.94	1680.58
3157.89	7024.9	5147.33	3452.12	3356.76	2771.25	4350.47	1737.52
3159.89	7109.04	4918.6	3346.73	3296.02	2798.66	4293.81	1763.8
3161.89	7139.03	4660.84	3236.99	3307.05	2820.86	4232.95	1765.76
3163.89	7105.89	4396.6	3164.2	3328.68	2834.8	4166.03	1744.48
3165.89	7019.89	4143.56	3123.03	3359.44	2844.95	4098.17	1703.36
3167.89	6868.73	3957.75	3100.49	3389.63	2878.52	4039.02	1632.72
3169.89	6668.59	3805.33	3098.62	3422.02	2931.44	3985.2	1536.76
3171.89	6414.23	3692.08	3105	3462.74	2987.97	3932.4	1415.48
3173.88	6081.55	3610	3107.91	3492.11	3062.46	3870.81	1258.4
3175.88	5706.17	3557.78	3113.85	3521.03	3122.46	3804.26	1083.95
3177.88	5307.36	3519.64	3139.33	3575.43	3165.78	3741.51	897.605
3179.88	4895.74	3518.2	3145.84	3647.15	3210.94	3683.57	708.971
3181.88	4554.21	3526.49	3136.6	3721.67	3231.58	3634.11	564.666
3183.88	4300.06	3551.81	3116.59	3815.78	3220.39	3600.93	478.736
3185.88	4109.02	3574.08	3080.98	3892.51	3172.31	3565.78	444.91
3187.87	3969.97	3602.15	3066.43	3935.15	3090.13	3532.77	439.107
3189.87	3876.14	3623.59	3058.3	3934.12	3004.56	3499.34	443.221
3191.87	3812.79	3634.22	3035.49	3895.75	2930.51	3461.75	448.679
3193.87	3763.55	3634.95	3020.48	3811.17	2871.78	3420.39	440.852
3195.87	3744.04	3653.5	3014.88	3710.47	2843.77	3393.33	429.1
3197.87	3739.14	3698.93	3007.93	3626.33	2822.1	3378.89	430.425
3199.87	3738.7	3751.05	3022.21	3565.84	2800.44	3375.65	437.232
3201.87	3751.81	3813.76	3022.16	3523.85	2788.95	3380.11	454.003
3203.86	3798.79	3868.13	3012.27	3479.97	2793.6	3390.55	474.916
3205.86	3864.68	3918.83	3016.61	3430.09	2799.74	3405.99	498.282
3207.86	3942.86	3944.04	3035.94	3374.07	2809.89	3421.36	517.162
3209.86	4028.91	3947.06	3053.2	3315.77	2826.72	3434.33	535.005
3211.86	4112.24	3930.88	3069.94	3270.25	2836.25	3443.91	552.961
3213.86	4179.07	3883.84	3075.88	3232.1	2839.95	3442.17	565.477
3215.86	4188.11	3809.28	3093.53	3200.1	2838.81	3425.97	555.443
3217.85	4147.51	3746.93	3140.24	3175.12	2825.76	3407.11	530.727
3219.85	4064.97	3690.51	3212.76	3154	2807.42	3385.93	493.031
3221.85	3972.87	3663.6	3304.76	3151.48	2793.06	3377.15	456.689
3223.85	3895.43	3622.09	3397.44	3153.05	2776.12	3368.83	430.154
3225.85	3861.51	3575.19	3480.65	3175.89	2771.47	3372.94	415.87
3227.85	3857.23	3544.88	3536.23	3206.89	2776.08	3384.26	410.468
3229.85	3833.32	3543.79	3569.23	3238.07	2782.88	3393.46	401.226
3231.85	3806.26	3597.4	3561.04	3255.76	2768.86	3397.86	402.823
3233.84	3802.2	3687.39	3529.63	3264.35	2758.79	3408.47	415.437
3235.84	3811.82	3790.12	3452.36	3252.58	2745	3410.37	440.1
3237.84	3813.12	3900.01	3359.82	3248.58	2728.81	3410.07	473.079
3239.84	3792.01	3998.57	3265.94	3246.29	2718.57	3404.27	504.433
3241.84	3754.53	4049.75	3181.43	3247.08	2707.07	3387.97	524.036
3243.84	3708.69	4033.26	3110.88	3231.8	2706.91	3358.31	519.584
3245.84	3669.37	3985.29	3081.4	3223.43	2717.5	3335.4	498.182
3247.83	3639.65	3898.1	3097.2	3201.8	2740.65	3315.48	457.037
3249.83	3655.34	3811.68	3140.94	3174.77	2760.27	3308.6	424.263
3251.83	3672.39	3752.84	3215.74	3156.96	2768.33	3313.25	404.069
3253.83	3675.77	3741.47	3305.76	3144.96	2764.77	3326.54	400.974
3255.83	3698.33	3776.26	3390.86	3154.59	2758.22	3355.65	416.213
3257.83	3745.24	3817.73	3467.51	3174.65	2757.37	3392.5	436.383
3259.83	3794.73	3848.78	3537.17	3202.3	2754.43	3427.48	455.004
3261.83	3821.22	3882.15	3589.27	3227.65	2757.63	3455.58	467.069
3263.82	3849.42	3905.99	3621.4	3256.62	2775.27	3481.74	470.229
3265.82	3886.68	3913.03	3643.82	3284.65	2800.39	3505.71	468.098
3267.82	3914.42	3890.63	3650.66	3324.24	2842.9	3524.57	449.082
3269.82	3940.91	3865.96	3611.91	3371.43	2889.66	3535.97	425.271
3271.82	3979.37	3857.95	3526.52	3422.09	2937.78	3544.74	409.506
3273.82	4033.76	3851.85	3423.78	3479.17	2983.35	3554.38	408.378
3275.82	4045.86	3860.63	3313.19	3503.58	3011.17	3546.89	415.6
3277.81	4013.16	3904.33	3231.31	3512.61	3014.23	3535.13	426.901
3279.81	3944.87	3973.44	3213.16	3494.43	2987.23	3522.62	437.244
3281.81	3865.79	4046.33	3199.94	3478.98	2937.28	3505.66	458.052
3283.81	3777.75	4113.12	3187.63	3460.92	2892.22	3486.33	479.744
3285.81	3726.34	4166.17	3157.32	3443.36	2845.17	3467.67	509.714
3287.81	3744.06	4188.68	3111.22	3435.5	2793.32	3454.56	542.731
3289.81	3748.44	4190.3	3048.2	3428.69	2765.33	3436.19	562.768
3291.81	3757.12	4155.91	3008.42	3400.14	2751.49	3414.62	563.863
3293.8	3777.48	4104.71	2998.27	3373.65	2748.32	3400.48	553.597
3295.8	3793.48	4058.55	2981.06	3365.77	2738.77	3387.53	548.101
3297.8	3798.39	4011.99	2957.71	3366.25	2731.36	3373.14	541.636
3299.8	3831.88	3990.4	2956.55	3373.01	2706.7	3371.71	549.802
3301.8	3884.74	3964.91	2956.93	3372.46	2685.68	3372.94	560.749
3303.8	3936.66	3914.39	2968.15	3355.79	2671.57	3369.31	562.796
3305.8	3970.44	3869.15	3007.39	3335.31	2671.4	3370.73	554.619
3307.79	3974.83	3844.51	3058.18	3343.74	2685.45	3381.34	537.787
3309.79	3950.35	3837.48	3102.64	3361.39	2701.94	3390.76	517.458
3311.79	3899.04	3831.73	3164.31	3397.22	2722.1	3402.88	487.466
3313.79	3848.71	3811.77	3267.9	3424.07	2730.73	3416.64	457.018
3315.79	3789.38	3787.64	3373.25	3440.26	2755.09	3429.12	423.052
3317.79	3770.11	3728.02	3428.81	3433.35	2786.31	3429.32	393.332
3319.79	3746.49	3656.06	3452.36	3418.27	2813.6	3417.35	364.37
3321.79	3712.01	3609.44	3446.83	3399.9	2826.11	3398.86	343.784
3323.78	3691.63	3582.53	3411.69	3406.81	2820.73	3382.68	336.38
3325.78	3675.1	3585.14	3327.86	3415.99	2811.5	3363.12	337.248
3327.78	3685.35	3598.35	3232.03	3422.79	2820.18	3351.74	344.255
3329.78	3692.73	3623.07	3146.65	3420.65	2822.43	3341.11	359.273
3331.78	3709.92	3641.77	3084.8	3423.87	2815.36	3335.14	379.209
3333.78	3745.52	3652.33	3080.67	3419.82	2822.64	3344.19	388.326
3335.78	3785.1	3670.07	3088.56	3415.85	2822.59	3356.44	400.749
3337.77	3843.23	3695.97	3085.57	3415.71	2804.71	3369.04	427.999
3339.77	3909.89	3717.56	3091.01	3422.72	2785.22	3385.28	456.533
3341.77	3985.96	3753.14	3105.44	3428.95	2766.92	3408.08	488.908
3343.77	4099.28	3779.73	3147.05	3427.82	2752.52	3441.28	526.466
3345.77	4245.31	3818.61	3195.46	3415.12	2727.59	3480.42	581.303
3347.77	4417.53	3859.07	3240.61	3379.89	2723.38	3524.1	642.794
3349.77	4602.26	3888.39	3281.79	3328.69	2719.87	3564.2	712.528
3351.77	4807.23	3932.01	3303.32	3275.06	2724.77	3608.48	794.811
3353.76	5045.8	3959.59	3329.85	3250.67	2742.87	3665.76	884.264
3355.76	5323.59	3982.55	3372.34	3258.53	2760.73	3739.55	986.475
3357.76	5618.89	4011.15	3385.1	3285.33	2776.02	3815.3	1099.7
3359.76	5915	4020.92	3362.74	3305.81	2789.19	3878.73	1219.45
3361.76	6199.94	4009.29	3327.21	3339.45	2807.99	3936.77	1335.07
3363.76	6473.51	4002.94	3277.66	3388.69	2826.91	3993.94	1448.25
3365.76	6733.18	3995.92	3230.87	3449.51	2841.86	4050.27	1556.72
3367.75	6967.15	3962.85	3179.16	3521.1	2843.9	4094.83	1658.32
3369.75	7180.54	3908.13	3162.31	3571.06	2828.85	4130.18	1753.35
3371.75	7354.62	3867.14	3128.44	3603.07	2808.63	4152.38	1836.54
3373.75	7496.8	3845.69	3075.51	3606.38	2788.36	4162.55	1910.3
3375.75	7610.12	3837.77	3033.24	3576.85	2775.85	4166.76	1970.56
3377.75	7687.96	3841.7	2993.72	3536.82	2776.98	4167.44	2013.01
3379.75	7722.73	3841.39	2977.46	3483.33	2786.9	4162.36	2033.24
3381.75	7713.37	3837.46	2958.81	3423.93	2811.4	4149	2033.06
3383.74	7649.54	3812.98	2952.39	3387.91	2823.9	4125.35	2008.17
3385.74	7534.47	3782.59	2971.62	3344.6	2829.34	4092.52	1959.24
3387.74	7359.97	3778.99	3010.77	3311.21	2833.12	4058.81	1879.87
3389.74	7127.8	3789.43	3069.27	3310.13	2839.67	4027.26	1768.64
3391.74	6836.11	3832.48	3149.57	3303.71	2838.26	3992.03	1630.11
3393.74	6537.08	3872.87	3234.58	3281.09	2819.21	3948.97	1494.73
3395.74	6239.03	3912.26	3322.64	3269.75	2783.02	3905.34	1364.67
3397.73	5921.12	3937.97	3409.49	3274.31	2745.69	3857.72	1229.02
3399.73	5595.13	3951.35	3473.85	3283.53	2702.51	3801.27	1098.07
3401.73	5282.03	3933.87	3505.94	3298.14	2668.01	3737.6	976.551
3403.73	5008.19	3892.25	3507.17	3301.94	2639.78	3669.86	875.142
3405.73	4766.52	3863.45	3475.61	3310.23	2614.37	3606.04	790.71
3407.73	4570.42	3834.72	3390.46	3320.31	2596.12	3542.41	726.315
3409.73	4433.02	3803.22	3282.9	3329.77	2592.96	3488.37	682.022
3411.73	4319.98	3763.91	3188.99	3338.17	2609.98	3444.21	640.606
3413.72	4223.42	3715.8	3105.68	3340.7	2622.08	3401.54	606.844
3415.72	4155.62	3662.89	3056.62	3353.89	2634.09	3372.62	579.432
3417.72	4095.32	3621.61	3018.55	3366.8	2658.42	3352.14	551.742
3419.72	4043.02	3618.82	2989.82	3359.15	2690.7	3340.3	528.335
3421.72	4011.54	3649.76	2989.62	3331.04	2722.56	3340.91	512.591
3423.72	3972.22	3695.75	3006.67	3318.09	2742.64	3347.07	498.608
3425.72	3924.01	3728.05	3014.11	3322.64	2767.85	3351.33	480.85
3427.71	3885.02	3748.64	3033.5	3342.56	2792.47	3360.44	462.516
3429.71	3881.74	3761.85	3055.41	3360.35	2794.4	3370.75	459.838
3431.71	3904.96	3754.74	3063.22	3380.31	2781.71	3376.99	467.511
3433.71	3921.08	3719.83	3056.64	3389.69	2782.11	3373.87	466.42
3435.71	3936.3	3684.87	3061.91	3397.42	2778.31	3371.76	465.186
3437.71	3951.44	3629.6	3059.52	3405.69	2774.39	3364.13	463.063
3439.71	3964.14	3572.24	3072.76	3384.45	2764.24	3351.56	460.354
3441.71	3972.86	3526.83	3112.36	3343.99	2758.69	3342.95	454.184
3443.7	3955.39	3533.96	3155.99	3305.03	2753.09	3340.69	446.056
3445.7	3927.33	3553.02	3191.96	3270.07	2754.89	3339.45	435.747
3447.7	3908.92	3570.32	3218.27	3237.57	2753.59	3337.73	431.822
3449.7	3905.42	3586.99	3225.03	3203.32	2736.16	3331.38	440.696
3451.7	3894.72	3601.52	3196.93	3180.97	2706.39	3316.11	452.898
3453.7	3902.23	3606.29	3172.16	3179.2	2682.86	3308.55	465.814
3455.7	3969.69	3636.12	3179.98	3178.34	2655.59	3323.94	500.763
3457.69	4079.23	3722.81	3169.39	3174.3	2633.73	3355.89	558.374
3459.69	4258.45	3837.35	3137.57	3187.77	2609.65	3406.16	645.485
3461.69	4502.1	3971.37	3124.7	3202.19	2588.98	3477.87	755.555
3463.69	4820.93	4115.21	3101.25	3204.45	2570.44	3562.46	896.419
3465.69	5116.41	4267.33	3076.9	3194.31	2550.83	3641.15	1033.84
3467.69	5419.59	4404.8	3071.94	3189	2536.27	3724.32	1168.4
3469.69	5620.74	4502.33	3072.38	3189.42	2543.53	3785.68	1253.82
3471.69	5613.02	4555.63	3090.79	3192.74	2545.87	3799.61	1255.25
3473.68	5541.32	4575.92	3097.53	3184.3	2539.39	3787.69	1234.42
3475.68	5493.19	4569.36	3109.21	3185.85	2536.56	3778.83	1215.24
3477.68	5483.8	4567.71	3153.25	3185.47	2541.44	3786.33	1204.53
3479.68	5465.87	4554.47	3212.87	3185.99	2542.53	3792.35	1188.17
3481.68	5393.04	4579.5	3269.48	3197.89	2549.5	3797.88	1156.84
3483.68	5255.52	4600.51	3311.21	3220.34	2558.55	3789.22	1103.96
3485.68	5067.13	4599.07	3370.69	3231.55	2563.63	3766.41	1033.75
3487.67	4866.25	4582.13	3426.46	3223.98	2573.01	3734.37	962.277
3489.67	4665.25	4589.28	3461.46	3211.08	2582.02	3701.82	903.928
3491.67	4473.66	4617.37	3469.7	3214.68	2595.29	3674.14	858.155
3493.67	4284.07	4643.05	3469.06	3215.26	2609.74	3644.24	820.352
3495.67	4165.62	4632.21	3480.59	3210.2	2621.65	3622.05	791.571
3497.67	4061.44	4596.34	3470.66	3214.69	2630.51	3594.73	760.03
3499.67	3987.87	4526.15	3459.11	3209.07	2648.78	3566.2	721.105
3501.67	3908.87	4445.15	3453.29	3211.56	2674.68	3538.71	674.447
3503.66	3828.2	4387.6	3429	3225.27	2708.34	3515.68	632.764
3505.66	3739.85	4360.21	3398.41	3241.96	2737.2	3495.52	603.355
3507.66	3664.07	4359.13	3335.95	3248.12	2766.14	3474.68	589.647
3509.66	3639.39	4385.7	3252.39	3257.22	2793.9	3465.72	595.158
3511.66	3645.3	4426.44	3179.73	3276.62	2814.73	3468.56	611.665
3513.66	3653.69	4471.89	3107.29	3292.62	2832.1	3471.52	633.929
3515.66	3670.34	4513.02	3088.17	3293.33	2841.34	3481.24	651.849
3517.65	3680.62	4540.21	3098.78	3312.48	2854.64	3497.34	657.126
3519.65	3682.64	4549.01	3111.04	3351.9	2877.72	3514.46	650.615
3521.65	3686.84	4559.14	3121.2	3390.14	2892.33	3529.93	647.502
3523.65	3666.51	4597.9	3135.86	3418.39	2915.45	3546.82	652.514
3525.65	3641.08	4646.13	3157.73	3439.58	2933.92	3563.69	662.284
3527.65	3636.02	4704.66	3169.58	3465.71	2947.1	3584.62	680.067
3529.65	3647.25	4791.78	3174.29	3478.74	2958.15	3610.04	712.384
3531.65	3678.53	4904.84	3177.86	3471.39	2959.33	3638.39	759.377
3533.64	3703.95	5068.24	3202.14	3476.01	2941.76	3678.42	828.062
3535.64	3710.1	5292.27	3223.04	3504.58	2911.99	3728.4	924.397
3537.64	3716.87	5617.43	3239.22	3532.35	2883.7	3797.91	1064.86
3539.64	3723.29	5977.52	3248.14	3559.71	2855.16	3872.77	1222.29
3541.64	3712.74	6330.9	3260.41	3572.46	2817.44	3938.79	1380.68
3543.64	3685.61	6698.74	3256.7	3552.58	2774.22	3993.57	1552.18
3545.64	3638.07	7047.01	3239.77	3526.77	2743.92	4039.11	1716.63
3547.63	3602.88	7358.9	3199.65	3527.79	2726.3	4083.11	1863.55
3549.63	3573.07	7637.25	3176.7	3525.98	2702.58	4123.12	1995.11
3551.63	3555.34	7872.2	3186.43	3504.12	2671.84	4157.99	2105.87
3553.63	3551.92	8051.91	3204	3479.1	2650.74	4187.53	2189.08
3555.63	3568.07	8178.82	3206.89	3451.11	2631.79	4207.34	2249.24
3557.63	3586.59	8244.82	3203.62	3421.71	2625.37	4216.42	2281.09
3559.63	3620.26	8247.07	3225.72	3413.18	2618.54	4224.96	2279.31
3561.63	3679.29	8162.54	3248.07	3392.08	2614.57	4219.31	2238.5
3563.62	3746.83	8002.7	3244.16	3353.77	2616.5	4192.79	2168.11
3565.62	3800.15	7772.07	3212.63	3340.13	2607.41	4146.48	2070.98
3567.62	3818.1	7472.49	3139.53	3334.94	2610.58	4075.13	1947.84
3569.62	3919.06	7119.85	3055.84	3330.84	2606.95	4006.51	1804.14
3571.62	3988.96	6739.86	2992.94	3341.05	2609.77	3934.52	1648.23
3573.62	4069.77	6344.59	2956.14	3360.95	2609.28	3868.15	1487.21
3575.62	4167.32	5972.71	2926.11	3369.36	2605.4	3808.18	1344.57
3577.61	4267.13	5642.32	2897.74	3374.48	2605.17	3757.37	1227.4
3579.61	4369.35	5337.13	2883.62	3390.25	2623.05	3720.68	1123.42
3581.61	4502.62	5097.92	2859.45	3398.95	2645.86	3700.96	1061.45
3583.61	4650.84	4933.28	2852.97	3407.65	2662.37	3701.42	1037.38
3585.61	4792.19	4794.74	2854.97	3419.65	2671.6	3706.63	1029.73
3587.61	4890.64	4660.86	2875.42	3422.28	2681.97	3706.23	1016.63
3589.61	4901.72	4511	2883.06	3429.88	2692.04	3683.54	981.94
3591.61	4874.85	4369.99	2895.12	3437.16	2703.98	3656.22	939.223
3593.6	4893.2	4253.26	2914.56	3440.46	2718.93	3644.08	916.646
3595.6	4898.15	4171.34	2916.77	3464.41	2737.79	3637.69	899.042
3597.6	4826.34	4126.29	2904.3	3502.82	2743.72	3620.69	866.805
3599.6	4686.95	4114.51	2868.64	3525.81	2749.57	3589.09	822.984
3601.6	4487.63	4130.56	2847.93	3539.03	2763.66	3553.76	762.804
3603.6	4246.16	4156.04	2842.25	3526.33	2768.53	3507.86	699.144
3605.6	4184.05	4181.2	2840.91	3500.73	2780.38	3497.46	686.329
3607.59	4044.61	4192.09	2829.33	3493.41	2811.18	3474.12	651.259
3609.59	3980.47	4186.34	2816.27	3476.08	2817.95	3455.42	637.424
3611.59	3913.52	4167.5	2830.7	3471.07	2825.44	3441.65	613.057
3613.59	3854.52	4164.48	2836.86	3478.96	2827.42	3432.45	599.368
3615.59	3834.22	4172.81	2843.92	3474.39	2807.37	3426.54	601.709
3617.59	3849.81	4197.87	2875.27	3480.7	2771.34	3435	614.385
3619.59	3889.37	4225.45	2922.56	3475.08	2730.48	3448.59	630.653
3621.59	3945.3	4233.93	2969.03	3455.49	2685.73	3457.9	647.117
3623.58	4003.96	4224.67	3009.19	3402.27	2653.62	3458.74	659.055
3625.58	4050.92	4183.82	3049.54	3332.35	2647.88	3452.9	655.203
3627.58	4084.23	4141.76	3075.46	3287.73	2658.29	3449.5	646.954
3629.58	4093.53	4112.94	3093.16	3261.49	2681.07	3448.44	633.982
3631.58	4078.83	4082.98	3110.18	3246.94	2698.57	3443.5	615.88
3633.58	4073.63	4040.15	3098.6	3250.56	2706.52	3433.89	602.478
3635.58	4063.43	3991.62	3075.49	3277.89	2709.67	3423.62	588.245
3637.57	4050.93	3960.1	3059.34	3314.44	2710.78	3419.12	577.494
3639.57	4043.03	3942.08	3032.37	3356.63	2695.66	3413.95	578.68
3641.57	4047.46	3931.75	2994.23	3392.8	2692.49	3411.75	584.497
3643.57	4050.99	3921.74	2960.55	3444.82	2708.92	3417.4	584.637
3645.57	4059.03	3917.01	2957.54	3505.91	2717.37	3431.37	585.163
3647.57	4039.01	3883.62	2959.19	3562.56	2732.46	3435.37	570.597
3649.57	3992.59	3851.75	2969.24	3604.23	2737.97	3431.16	551.347
3651.57	3947.96	3845.25	2973.37	3627.63	2737.3	3426.3	540.381
3653.56	3892.91	3819.34	2960.83	3626.47	2740.2	3407.95	523.923
3655.56	3854.81	3793.73	2953.28	3611.79	2727.07	3388.14	514.396
3657.56	3817.73	3760.05	2932.25	3589.16	2726.67	3365.17	501.5
3659.56	3777.72	3716.25	2908.52	3569.17	2723.42	3339.02	487.858
3661.56	3732.71	3688.77	2904.71	3571.08	2719.85	3323.42	474.853
3663.56	3695.49	3665.37	2919.23	3583.38	2704.81	3313.66	465.972
3665.56	3662.89	3658.45	2932.71	3611.7	2675.02	3308.15	469.708
3667.55	3634.56	3662.45	2937.82	3658.03	2665.15	3311.6	475.662
3669.55	3593.25	3675.62	2920.1	3715.61	2663.55	3313.63	486.9
3671.55	3541.8	3696.83	2907.72	3795.5	2669.9	3322.35	502.461
3673.55	3523.27	3729.19	2924.57	3857.33	2671.6	3341.19	517.691
3675.55	3550.13	3759.84	2962.62	3889.79	2677.51	3367.98	524.426
3677.55	3608.69	3777.19	3008.53	3896.18	2689.7	3396.06	521.948
3679.55	3683.5	3776.8	3064.78	3860.76	2718.21	3420.81	502.418
3681.55	3792.9	3785.24	3102.36	3791.7	2742.89	3443.02	491.766
3683.54	3956.73	3782.73	3119.27	3708.48	2755.43	3464.53	506.226
3685.54	4145.38	3801.48	3115.03	3618.64	2735.98	3483.3	559.469
3687.54	4345.13	3846.51	3106.88	3529.82	2714.95	3508.66	633.578
3689.54	4563.87	3926.85	3101.77	3452.19	2713.32	3551.6	721.188
3691.54	4799.84	4018.59	3074.72	3395.08	2695.61	3596.77	829.248
3693.54	5038.32	4120.75	3017.05	3348.96	2685.4	3642.1	944.779
3695.54	5248.38	4211.54	2945.23	3307.47	2680.17	3678.56	1051.27
3697.53	5443.55	4280.26	2882.87	3274.7	2686.08	3713.49	1145.91
3699.53	5594.83	4315.26	2827.54	3253.42	2690.47	3736.31	1218.82
3701.53	5713.09	4312.64	2797.93	3254.56	2696.29	3754.9	1268.1
3703.53	5773.24	4279.66	2782.06	3276.91	2685.45	3759.47	1291.08
3705.53	5776.29	4201.33	2773.85	3316.63	2676.63	3748.95	1284.75
3707.53	5700.2	4105.93	2778.11	3359.03	2695.4	3727.73	1238.66
3709.53	5541.74	4017.44	2773.38	3399.5	2710.97	3688.61	1163.96
3711.53	5318.99	3943.03	2779.83	3423.12	2719.82	3636.96	1065.88
3713.52	5034.43	3925.72	2781.05	3442.99	2727.44	3582.33	951.157
3715.52	4718.97	3914.78	2787.08	3453.72	2714.87	3517.88	834.141
3717.52	4463.38	3891.06	2819.76	3458.56	2690.41	3464.63	740.717
3719.52	4273.59	3861.57	2855.74	3444.38	2685.91	3424.24	667.343
3721.52	4154.44	3833.23	2918.42	3439.6	2687.6	3406.66	611.891
3723.52	4103.29	3782.76	2997.96	3423.99	2693.66	3400.33	570.58
3725.52	4071.34	3734.87	3081.13	3387.41	2700.44	3395.04	537.106
3727.51	4073.04	3688.38	3161.94	3339.42	2698.47	3392.25	521.615
3729.51	4094.78	3657.1	3263.03	3313.72	2684.88	3402.7	521.148
3731.51	4116.89	3623.85	3351.7	3296.21	2659.2	3409.57	530.441
3733.51	4134.02	3609.65	3420.63	3284.61	2630.5	3415.88	544.828
3735.51	4140.35	3600.26	3460.85	3251.1	2596.84	3409.88	560.952
3737.51	4146.75	3615.21	3467.95	3214.63	2569.57	3402.82	577.168
3739.51	4184.81	3618.29	3427.86	3207.17	2550.09	3397.64	596.628
3741.51	4215.03	3605.78	3347.83	3227.79	2548.66	3389.02	604.81
3743.5	4219.15	3609.55	3267.3	3242.43	2564.4	3380.57	602.848
3745.5	4186.6	3623.73	3179.83	3269.16	2583.51	3368.56	590.782
3747.5	4119.66	3662.77	3096.25	3283.29	2607.18	3353.83	572.442
3749.5	4050.51	3725.91	3008.7	3289.67	2642.81	3343.52	559.476
3751.5	3974.3	3821.74	2968.82	3292.33	2694.13	3350.26	545.683
3753.5	3945.96	3934.61	2950.51	3271.16	2747.66	3369.98	553.075
3755.5	3958.24	4085.5	2965.46	3248.71	2797.07	3411	582.272
3757.5	3957.6	4196.57	2982.72	3250.6	2821.19	3441.74	605.844
3759.49	3953.52	4307.47	3000.04	3262.58	2821.94	3469.11	636.2
3761.49	3948.93	4382.05	2999.54	3281.85	2800.46	3482.57	664.346
3763.49	3937.21	4415.14	2996.62	3278.84	2779.95	3481.55	679.654
3765.49	3956.03	4414.3	2979.75	3256.09	2760.81	3473.39	692.264
3767.49	4006.36	4384.52	2942.67	3243.8	2759.2	3467.31	699.727
3769.49	4089.46	4357.38	2896.92	3233.05	2741.96	3463.75	722.079
3771.49	4169.45	4315.39	2859.54	3207.69	2703.24	3451.06	746.911
3773.48	4257.26	4303.04	2820.35	3197.2	2661.47	3447.86	784.455
3775.48	4336.26	4306.98	2787.82	3208.01	2621.48	3452.11	822.092
3777.48	4388.42	4297.43	2770.74	3220.86	2590.51	3453.59	844.291
3779.48	4381.82	4265.84	2754.11	3236.43	2569.14	3441.47	842.512
3781.48	4330.14	4217.02	2732.67	3267.88	2557.01	3420.94	822.175
3783.48	4233.44	4186.39	2721.21	3296.46	2552.42	3397.98	791.023
3785.48	4114.67	4162.06	2713.46	3316.76	2571.32	3375.65	750.585
3787.48	3977.15	4184.71	2694.42	3312.38	2600.11	3353.76	721.72
3789.47	3866.45	4211	2671.43	3311.57	2620.68	3336.23	707.269
3791.47	3836.1	4223.37	2681.25	3336.53	2635.59	3342.57	699.391
3793.47	3828.87	4232.79	2716.63	3377.94	2637.68	3358.78	692.381
3795.47	3854.46	4213.5	2759.97	3425.4	2636.04	3377.88	681.872
3797.47	3885.23	4176.99	2813.04	3476.71	2647.19	3399.83	662.628
3799.47	3909.62	4161.35	2874	3515.64	2658.36	3423.79	647.423
3801.47	3921.47	4144.98	2937.83	3534.82	2667.78	3441.38	629.74
3803.46	3920.65	4121.85	3004.77	3525.94	2669.84	3448.61	609.411
3805.46	3906.65	4104.13	3051.68	3500.71	2673.76	3447.39	591.643
3807.46	3913.51	4043.56	3086.22	3457.2	2684.85	3437.07	566.603
3809.46	3926.61	3955.15	3111.31	3417.3	2711.95	3424.46	533.753
3811.46	3925.5	3863.67	3122.88	3389.32	2746.84	3409.64	498.545
3813.46	3909.44	3759.55	3105.27	3343.42	2792.92	3382.12	459.842
3815.46	3859.41	3695.13	3082.61	3296.67	2834.38	3353.64	423.895
3817.46	3808.71	3654.62	3071.61	3280.85	2893.78	3341.92	385.128
3819.45	3781.28	3604.45	3053.2	3270.65	2972.57	3336.43	348.806
3821.45	3766.58	3577	3049.93	3268.39	3061.55	3344.69	318.135
3823.45	3751.14	3581.59	3071.69	3273.6	3145.56	3364.72	290.926
3825.45	3770.28	3601.14	3087.59	3276.44	3215.08	3390.11	284.665
3827.45	3822.61	3636.83	3105.44	3287.99	3258.27	3422.23	296.487
3829.45	3885.9	3667.51	3112.54	3299.55	3263.08	3445.71	319.641
3831.45	3955.83	3694.34	3096.49	3313	3225.86	3457.1	356.821
3833.44	4007.95	3701.08	3075.71	3324.66	3152.64	3452.41	393.24
3835.44	4034.86	3709.16	3068.45	3323.69	3060.35	3439.3	424.858
3837.44	4041.39	3705.55	3069.21	3325.91	2963.32	3421.08	449.476
3839.44	4032.07	3681.53	3087.85	3316.45	2877.59	3399.1	462.627
3841.44	4023.6	3662.19	3106.97	3296.98	2810.42	3380.03	474.263
3843.44	4009.94	3656	3112.28	3262.63	2775.65	3363.3	480.183
3845.44	3972.41	3665.56	3127.19	3244.2	2765.23	3354.92	471.605
3847.44	3921.22	3668.05	3159.96	3220.74	2774.98	3348.99	450.252
3849.43	3879.23	3661.7	3178.61	3191.4	2792.64	3340.72	430.697
3851.43	3846.3	3664.58	3169.86	3190.89	2821.24	3338.57	412.907
3853.43	3837.23	3676.37	3144.07	3201.7	2863.57	3344.59	401.488
3855.43	3842.58	3675.04	3101.49	3212.33	2902.75	3346.84	396.54
3857.43	3860.47	3649.52	3061.4	3227.83	2937.55	3347.35	393.255
3859.43	3869.06	3619.98	3037.09	3255.26	2974.45	3351.17	384.131
3861.43	3868.81	3610.92	3026.43	3283.84	3003.03	3358.61	376.274
3863.42	3848.99	3611.42	3019.71	3307.14	3007.14	3358.88	369.265
3865.42	3802.2	3626.71	3015.88	3311.61	2998.34	3350.95	359.801
3867.42	3739.83	3645.7	3023.17	3302.24	2993.98	3340.98	344.547
3869.42	3683.19	3661.81	3034.25	3290.83	3001.43	3334.3	328.52
3871.42	3634.3	3679.06	3020.49	3270.31	3001.27	3321.09	324.605
3873.42	3609.34	3706.37	2992.19	3239.67	2988.58	3307.23	337.619
3875.42	3608.37	3765.26	2986.52	3204.79	2976.23	3308.23	361.724
3877.42	3601.76	3828.88	2973.94	3195.71	2942.29	3308.52	392.288
3879.41	3593.3	3887.98	2958.8	3204.07	2912.96	3311.42	420.271
3881.41	3587.96	3946.93	2966.43	3223.87	2885.45	3322.13	443.821
3883.41	3592.32	3981.68	3000.42	3258.33	2872.84	3341.12	451.561
3885.41	3615.5	4000.88	3053.23	3296.3	2878.25	3368.83	448.853
3887.41	3666.99	4003.36	3114.83	3335.13	2880.89	3400.24	444.502
3889.41	3737.29	3986.14	3190.29	3375.02	2884.05	3434.56	436.508
3891.41	3817.76	3921.95	3246.34	3418.02	2888.1	3458.43	423.042
3893.4	3856.86	3836.78	3283.68	3432.27	2889.81	3459.88	405.103
3895.4	3858.76	3760.94	3309.33	3441.77	2916.63	3457.49	376.77
3897.4	3836.87	3685.83	3299.05	3438.4	2947.61	3441.55	346.5
3899.4	3798.87	3625.43	3269.69	3444.15	2976.96	3423.02	318.263
3901.4	3773.28	3582.72	3238.03	3434.53	2998.81	3405.47	300.397
3903.4	3770.7	3571.77	3178.6	3405.11	3017.9	3388.82	300.56
3905.4	3749.06	3578.88	3107.29	3372.95	3021.68	3365.97	307.24
3907.4	3711.93	3613.98	3043.17	3344.96	3026.87	3348.18	315.929
3909.39	3691.9	3649.39	2984.37	3313.35	3025.81	3332.96	333.62
3911.39	3673.45	3695.21	2935.78	3290.25	3001.44	3319.23	359.061
3913.39	3677.54	3744.45	2901.11	3275.64	2964.21	3312.59	391.07
3915.39	3669.59	3779.28	2871.13	3266.32	2926.18	3302.5	415.655
3917.39	3668.04	3800.25	2856.02	3260.12	2889.08	3294.7	433.914
3919.39	3665.84	3824.72	2866.78	3256.64	2850.89	3292.97	447.263
3921.39	3664.78	3844.51	2868.57	3271.91	2835.15	3296.98	456.21
3923.38	3667.46	3855.56	2865.5	3300.32	2819.3	3301.63	464.629
3925.38	3668.49	3878	2897.95	3302.14	2795.06	3308.33	470.677
3927.38	3649.02	3882.17	2929.25	3298.12	2770.79	3305.87	468.532
3929.38	3617.97	3877.15	2951.22	3308.26	2740.9	3299.1	465.972
3931.38	3596.64	3861.4	2970.74	3310.39	2713.35	3290.5	462.437
3933.38	3573.29	3845	2967.91	3301.76	2693.58	3276.31	460.144
3935.38	3548.73	3838.43	2967.11	3300.23	2659.53	3262.81	465.26
3937.38	3508.11	3824.11	2985.24	3286.78	2632.53	3247.35	460.682
3939.37	3461.95	3808.28	3021.5	3285.19	2627.02	3240.79	446.578
3941.37	3441.44	3802.56	3056.99	3279.69	2638.93	3243.92	433.973
3943.37	3427.65	3800.13	3088.24	3273.74	2658.69	3249.69	421.478
3945.37	3422.66	3809.37	3080.03	3277.91	2686.36	3255.27	415.31
3947.37	3415.91	3853.52	3033.71	3294.79	2707.5	3261.08	428.438
3949.37	3429.86	3899.17	2963.07	3327.29	2725.42	3268.96	451.514
3951.37	3479.22	3940.65	2900.97	3364.91	2726.1	3282.37	483.164
3953.36	3551.37	3959.11	2830.23	3412.57	2726.57	3295.97	514.711
3955.36	3639.53	3976.99	2806.65	3454.29	2722.93	3320.08	541.246
3957.36	3756.28	4007.73	2801.91	3503.63	2726.94	3359.3	572.156
3959.36	3927.79	4005.19	2807.65	3551.98	2721.89	3402.9	607.985
3961.36	4154.39	3963.26	2804.21	3592.08	2718.19	3446.43	658.086
3963.36	4421.84	3909.54	2801.89	3630.61	2702.92	3493.36	734.345
3965.36	4688.64	3868.29	2801.97	3673.15	2678.24	3542.06	826.466
3967.36	4957.19	3823.95	2800.78	3715.06	2666.92	3592.78	923.916
3969.35	5141.8	3789.66	2786.8	3751.27	2654.64	3624.84	998.486
3971.35	5243.62	3745.16	2796.76	3779.5	2658.4	3644.69	1034
3973.35	5302.76	3719.74	2817.44	3791.6	2664.16	3659.14	1051.33
3975.35	5298.01	3712.76	2822.77	3778.68	2666.62	3655.77	1047.33
3977.35	5216.25	3720.37	2828.43	3755.83	2664.88	3637.15	1014.14
3979.35	5045.88	3729.97	2843.4	3726.61	2671.09	3603.39	943.231
3981.35	4810.18	3755	2863.05	3697.96	2682.77	3561.79	847.832
3983.34	4556.43	3798.21	2900.3	3677.73	2690.16	3524.57	749.838
3985.34	4308.9	3843.18	2951.72	3665.64	2696.23	3493.13	660.673
3987.34	4137.49	3886.04	3002.76	3646.68	2702.78	3475.15	603.46
3989.34	4080.98	3921.67	3043.84	3612.75	2701.71	3472.19	585.137
[truncated: 1,004 more rows]
