# Supplementary material for: Ionogel thin films as a compatibilizing pretreatment for electrospray deposition
Source: Royal Society of Chemistry journal article supplement (doi:10.1039/d5lp00359h), 2026-01-01
Supplement: d5lp00359h1.zip [file B data.xlsx]

## Sheet: Sheet1
Lateral	Height Data	Height Data	Height Data	Height Data	Height Data
µm	nm	nm	nm	nm	nm
correct	D1	D2	D3	D4	D5
0	-84.8852	-103.357	-65.8712	-108.985	25.9574
1.99867	-28.0632	-64.4515	-50.2861	-90.305	-7.69451
3.99734	-2.55156	-25.0027	-45.3967	-73.8998	-6.53967
5.996	20.0619	0.570761	-45.0568	-78.3995	-4.90399
7.99467	15.0926	-0.57688	-48.5278	-66.2593	-17.2745
9.99334	5.96535	22.4005	-42.9837	-45.5186	-4.20991
11.992	11.8902	31.6693	-44.9351	-50.829	9.70831
13.9907	23.6798	33.2637	-51.7829	-60.8989	6.4774
15.9893	14.612	13.4928	-54.7165	-48.2429	-23.3006
17.988	-11.2517	-11.9959	-43.6555	-36.1815	-50.3075
19.9867	-29.5811	-19.8443	-23.7294	-26.1436	-51.6866
21.9853	-33.2066	-31.7253	-15.3552	-24.6303	-42.0194
23.984	-21.1457	-45.0624	-18.3464	-28.1388	-27.278
25.9827	-1.14458	-53.0942	-6.97419	-55.5004	-6.64988
27.9813	16.2315	-64.3243	-3.68257	-92.9581	18.0051
29.98	39.186	-59.9319	-0.852174	-116.425	44.7454
31.9787	50.9117	-50.0683	21.017	-121.415	54.3183
33.9773	69.6842	-52.2287	47.8208	-118.676	46.0973
35.976	95.8008	-66.9839	66.4295	-114.489	36.2174
37.9747	109.97	-86.9209	72.0849	-117.476	32.7649
39.9734	108.531	-86.7766	61.4223	-113.68	20.2733
41.972	83.5513	-66.0846	33.4617	-102.333	-3.56469
43.9707	61.0445	-38.414	0	-109.149	-25.0814
45.9694	42.6743	-26.2483	-33.3502	-130.819	-35.4333
47.968	13.3199	-11.1054	-64.1072	-149.559	-25.2382
49.9667	-5.67635	-7.08007	-69.2	-149.234	-5.65974
51.9654	-9.66403	-23.1341	-53.5532	-144.812	17.8125
53.964	0	-35.6	-27.5075	-126.585	43.1582
55.9627	20.394	-32.7619	-13.1707	-112.325	47.3676
57.9614	45.0519	-35.1107	-9.32865	-99.9229	44.3172
59.96	72.5593	-31.8981	-4.70797	-67.1179	49.2407
61.9587	88.4126	-37.1856	-0.455881	-22.2218	43.8031
63.9574	86.0347	-34.779	6.54142	18.1374	41.176
65.956	74.6664	-2.54124	4.49113	34.5872	29.4744
67.9547	69.7622	31.5861	-6.62394	45.1142	10.045
69.9534	67.3409	69.8957	-7.51534	45.7582	-1.8388
71.952	74.8799	107.785	-13.4071	11.9115	-1.13935
73.9507	105.719	124.266	-15.9252	-36.1238	-2.80965
75.9494	155.949	126.08	-12.52	-66.5393	0.109946
77.948	201.495	114.226	-10.2287	-83.8734	-1.44118
79.9467	228.14	91.4211	0.787639	-85.2992	-13.0626
81.9454	249.398	74.5409	5.40332	-99.7858	-12.4352
83.944	252.996	58.5734	23.3697	-104.747	3.89393
85.9427	236.022	32.8975	41.6216	-93.6894	20.8505
87.9414	186.107	6.7494	45.6723	-74.2267	22.985
89.94	135.08	-2.46783	23.7118	-62.1213	-1.98194
91.9387	117.756	-8.96567	5.51945	-43.9129	-21.5138
93.9374	120.789	-7.47004	12.3677	-40.2991	-24.6225
95.936	137.149	10.9244	11.5865	-43.9	-47.5391
97.9347	135.587	19.6303	8.99713	-37.1649	-73.7794
99.9334	123.517	22.1567	-0.530365	-34.395	-84.7934
101.932	126.929	11.2513	-4.55153	-24.0774	-86.332
103.931	128.085	-0.904521	1.84493	-18.4963	-83.1072
105.929	126.738	1.16513	-0.793163	-17.1206	-75.6912
107.928	106.221	3.32525	-9.55033	-11.2052	-61.0089
109.927	58.168	-3.88911	-7.55431	-2.1212	-37.0692
111.925	6.52016	0	1.27184	3.82381	-6.92436
113.924	-36.8284	-7.06011	-3.43196	4.16761	30.101
115.923	-67.7625	0.695206	0.554842	-9.29007	69.6663
117.921	-86.815	30.0534	0.804912	-48.7504	95.2481
119.92	-98.8813	69.8194	0	-80.0664	114.145
121.919	-97.5269	114.477	20.4198	-114.139	128.18
123.917	-72.4277	152.033	26.6354	-142.759	124.222
125.916	-30.7201	192.029	38.701	-140.849	121.608
127.915	13.1356	216.262	82.6699	-142.446	106.241
129.913	61.9235	213.226	123.37	-139.603	83.2304
131.912	109.354	213.959	158.763	-132.976	81.2783
133.911	135.011	200.967	178.832	-110.906	69.7259
135.909	142.712	158.2	175.774	-83.6365	44.5943
137.908	132.304	120.889	136.937	-60.1155	12.5937
139.907	126.811	97.9218	94.8673	-53.5525	-4.48739
141.905	128.822	93.0144	83.0087	-56.3374	-7.48779
143.904	111.79	82.7965	79.6704	-57.4954	-1.42001
145.903	82.1141	54.5891	63.0802	-47.9632	8.95051
147.901	47.4177	16.9238	55.2776	-45.5271	15.79
149.9	10.1572	-9.93662	73.8471	-59.2402	5.33425
151.899	-17.478	-20.5988	104.597	-67.043	-1.2251
153.897	-16.1561	-21.9622	136.275	-73.0787	3.93106
155.896	-7.5177	-21.1218	161.335	-55.1093	-0.268428
157.895	0	-20.434	162.351	-27.8186	-11.9707
159.893	-5.28443	-11.6594	137.463	1.04936	-2.56753
161.892	-12.5741	0	104.769	7.89563	8.87405
163.891	-10.7775	20.9171	87.8543	0	33.5009
165.889	-15.0568	37.2856	80.4038	-8.74393	48.2647
167.888	-24.6052	63.0137	87.5415	-4.79865	55.4449
169.887	-15.0616	69.8858	85.136	14.1587	76.3291
171.885	19.7519	84.1977	64.8198	28.37	92.7778
173.884	65.3678	106.306	26.3321	46.3346	79.9168
175.883	127.626	151.616	12.0704	61.4738	68.8927
177.881	206.82	195.839	4.36442	72.0247	58.8422
179.88	309.182	218.08	17.4705	83.2023	53.3089
181.879	369.885	245.521	23.0863	90.176	68.7965
183.877	395.437	256.552	21.7547	93.3207	62.1699
185.876	412.289	232.489	33.2896	90.5382	42.1719
187.875	422.633	193.869	48.879	97.0758	44.8912
189.873	397.162	152.59	59.0902	73.7252	58.3205
191.872	347.533	105.103	57.4586	43.4233	80.1187
193.871	313.661	88.0058	64.0722	29.6198	97.3539
195.869	296.973	88.3994	66.0603	16.9329	96.3254
197.868	298.809	100.19	76.1887	12.9959	107.811
199.867	304.026	123.504	73.7546	0.180746	116.018
201.865	299.392	146.76	81.4243	-6.20503	116.92
203.864	286.279	160.88	91.3287	-21.1522	95.3402
205.863	246.48	156.797	72.8096	-28.8299	63.1607
207.861	195.206	145.625	41.4194	-35.2401	57.7234
209.86	149.068	106.106	27.4197	-45.2169	68.1775
211.859	124.484	71.4269	13.6326	-48.973	88.8328
213.857	123.443	65.5409	18.6964	-60.6293	105.565
215.856	143.714	77.1528	28.2358	-69.362	114.158
217.855	167.993	92.7885	32.7749	-68.7783	106.278
219.853	176.033	111.839	41.5405	-46.4309	97.533
221.852	188.277	123.563	64.8626	-29.6076	110.043
223.851	189.643	141.64	71.2846	-6.22371	119.264
225.849	208.668	159.422	82.8732	16.5809	147.569
227.848	247.857	169.816	89.2297	25.5672	168.399
229.847	278.893	188.287	96.3904	31.6163	172.12
231.845	310.398	204.193	129.364	32.4119	168.517
233.844	328.359	204.125	161.084	16.6246	168.258
235.843	341.812	197.584	178.066	5.14319	171.713
237.841	342.002	194.658	187.259	-8.46829	158.211
239.84	312.307	185.406	209.729	3.74912	160.712
241.839	253.034	152.565	216.57	14.1264	144.016
243.837	203.422	99.691	229.992	13.1376	111.071
245.836	164.67	70.9523	233.223	16.9417	96.6417
247.835	136.267	60.5305	225.933	16.367	77.6366
249.833	118.875	75.2805	217.538	15.2482	64.9407
251.832	101.813	106.992	223.658	7.95084	58.4524
253.831	92.517	137.925	215.19	-12.6825	44.6701
255.829	99.8967	166.867	181.275	-26.0132	41.1653
257.828	123.59	185.746	151.725	-19.2702	51.531
259.827	144.728	206.192	121.254	-5.11432	55.627
261.825	183.27	215.048	116.604	12.83	69.7646
263.824	221.33	204.605	129.891	26.2491	78.7505
265.823	243.224	181.083	147.824	16.4978	86.7805
267.821	256.471	174.664	154.844	0	100.383
269.82	273.463	178.12	173.68	7.16599	91.3721
271.819	286.16	207.75	174.971	25.9842	77.3168
273.817	310.623	219.704	153.915	39.4863	71.8906
275.816	336.325	219.188	148.034	49.171	54.7468
277.815	332.885	207.259	147.934	44.516	50.6359
279.813	322.48	210.049	122.884	51.0459	60.5804
281.812	319.639	220.715	111.039	61.9141	86.1729
283.811	308.629	244.793	129.484	85.1371	112.712
285.809	320.529	257.099	137.79	102.329	127.827
287.808	323.223	253.314	141.238	118.832	129.828
289.807	331.675	237.157	137.187	124.628	104.838
291.805	329.044	224.293	126.534	132.326	73.8285
293.804	302.696	211.918	134.357	119.824	59.8709
295.803	273.086	193.281	147.679	112.82	51.4707
297.801	268.884	168	151.376	96.4661	61.1461
299.8	280.213	153.994	150.518	84.8906	72.3269
301.799	294.137	147.979	152.512	65.4407	85.5952
303.797	316.377	153.114	144.986	47.3272	95.0158
305.796	301.536	148.201	117.683	25.507	96.8767
307.795	280.48	159.862	97.97	8.66284	86.1995
309.793	246.411	178.641	92.9	-16.5754	74.8235
311.792	217.688	184.663	93.9234	-33.2443	53.954
313.791	194.03	193.411	105.81	-45.6391	25.9657
315.789	192.945	195.175	110.748	-44.1114	9.51331
317.788	206.666	182.871	116.563	-47.1633	0
319.787	229.147	172.977	105.817	-56.5434	9.32347
321.785	261.871	174.354	108.253	-62.8034	24.0077
323.784	305.544	205.004	122.771	-71.9432	42.7715
325.783	327.781	252.386	151.282	-52.0336	54.549
327.781	339.934	290.853	183.956	-21.6537	53.3567
329.78	334.738	317.344	217.374	14.1914	43.3201
331.779	322.701	326.751	252.742	41.3468	48.7213
333.777	322.896	317.936	265.639	61.6269	34.6187
335.776	318.559	279.776	280.574	67.0827	12.7016
337.775	327.529	239.809	295.208	68.9097	0
339.773	321.483	211.048	298.214	80.596	6.43433
341.772	317.267	180.382	304.479	107.75	26.6293
343.771	332.224	165.33	298.762	130.1	51.8099
345.769	355.358	157.591	306.593	151.598	68.4183
347.768	401.748	168.317	287.559	173.391	75.8348
349.767	454.353	201.075	258.802	188.175	95.8066
351.765	500.517	250.606	250.161	171.368	129.238
353.764	529.876	295.899	248.38	146.821	141.303
355.763	559.46	347.997	230.182	152.54	147.77
357.761	590.024	394.838	202.898	174.086	146.225
359.76	629.875	419.264	191.492	182.031	135.288
361.759	667.169	431.732	186.782	189.813	116.541
363.757	711.067	420.375	194.486	194.918	99.4487
365.756	747.861	384.464	183.807	196.799	109.526
367.755	777.765	354.882	181.99	169.074	123.533
369.753	799.97	334.794	182.994	130.32	130.476
371.752	839.978	335.656	172.94	97.6281	120.379
373.751	904.379	338.813	176.299	70.1268	120.723
375.75	993.261	344.919	175.59	73.044	113.696
377.748	1092.84	381.686	193.533	91.6793	99.0325
379.747	1218.42	426.632	210.574	95.0726	88.9735
381.746	1337.71	473.126	219.928	93.557	70.2373
383.744	1396.96	528.685	237.851	83.4541	51.4614
385.743	1443.53	560.302	261.916	80.3238	58.2242
387.742	1479.55	555.328	284.674	76.7226	81.6339
389.74	1504.73	524.751	297.134	81.5455	112.284
391.739	1498.95	472.965	301.535	85.4645	148.123
393.738	1472.29	424.558	279.542	102.491	172.668
395.736	1466.82	372.293	251.843	122.08	181.528
397.735	1486.08	342.945	256.333	137.559	170.105
399.734	1512.62	307.982	273.73	149.467	147.815
401.732	1557.73	266.489	296.506	154.763	143.702
403.731	1616.74	252.624	320.581	152.127	134.942
405.73	1672.56	240.058	334.893	118.642	132.052
407.728	1720.16	235.844	343.506	78.2401	123.441
409.727	1774.81	229.153	332.627	59.1658	109.731
411.726	1830.86	238.15	299.003	65.2812	86.2835
413.724	1890.91	242.8	276.873	85.0329	81.5089
415.723	1955.54	252.792	289.195	88.8859	90.9281
417.722	2020.89	269.701	322.622	78.2932	93.7291
419.72	2088.13	278.945	345.492	69.6683	81.9339
421.719	2155.52	265.619	351.035	70.3476	62.8963
423.718	2246.43	232.754	357.38	79.1961	71.2125
425.716	2360.52	209.633	345.394	102.404	91.9172
427.715	2483.56	206.485	341.193	102.582	110.278
429.714	2630.31	213.766	337.081	94.9698	122.27
431.712	2807.29	225.996	318.392	101.786	127.013
433.711	2987.33	252.275	313.422	101.94	111.82
435.71	3123.47	279.138	310.243	101.472	105.553
437.708	3220.8	308.579	290.015	116.951	105.981
439.707	3290.27	339.311	280.938	141.919	84.5588
441.706	3347.16	367.645	300.652	160.477	46.1216
443.704	3381.27	379.553	320.899	170.81	28.9422
445.703	3392.44	367.657	337.366	203.792	34.9431
447.702	3370.56	356.012	351.425	245.293	59.1485
449.7	3343.86	333.008	356.207	265.249	92.4739
451.699	3325.35	320.322	372.135	277.855	132.576
453.698	3321.79	304.555	373.281	281.913	167.726
455.696	3384.29	276.866	373.175	255.182	188.125
457.695	3451.04	264.949	380.348	229.34	201.952
459.694	3465.1	274.125	406.885	217.611	222.695
461.692	3437.05	306.434	414.735	190.548	230.392
463.691	3391.47	350.236	403.966	179.535	219.872
465.69	3329.21	405.018	364.408	177.612	203.22
467.688	3281.93	461.641	310.601	174.486	215.249
469.687	3271.92	515.288	276.566	179.739	243.233
471.686	3287.73	552.656	250.528	179.451	250.858
473.684	3301.95	597.454	256.217	174.563	248.062
475.683	3325.32	662.008	258.466	185.261	231.215
477.682	3348.58	740.217	265.152	199.799	187.714
479.68	3373.06	822.835	267.125	214.831	155.081
481.679	3402.39	904.558	273.429	222.36	144.44
483.678	3450.72	998.162	283.293	242.828	138.635
485.676	3513.39	1081.58	299.667	254.02	138.46
487.675	3587.87	1140.39	307.859	264.066	120.774
489.674	3660.74	1179.89	309.43	271.981	103.59
491.672	3710.02	1211.68	286.719	260.507	92.5884
493.671	3724.79	1214.06	254.612	226.2	96.417
495.67	3708.84	1194.32	243.314	196.131	109.599
497.668	3676.56	1190.53	249.968	184.789	130.619
499.667	3640.24	1213.31	276.896	193.648	158.609
501.666	3584.37	1253.35	307.499	211.913	187.623
503.664	3544.75	1299.22	317.553	225.026	210.63
505.663	3532.82	1346.36	324.743	238.091	220.699
507.662	3500.42	1402.63	339.987	259.907	210.02
509.66	3459.27	1467.81	356.506	273.151	211.45
511.659	3433.35	1533.66	373.777	285.807	217.062
513.658	3411.9	1606.76	378.093	291.143	212.053
515.656	3376.73	1682.82	398.541	281.762	227.054
517.655	3337.38	1764.66	407.718	273.229	226.671
519.654	3318.97	1860.29	400.267	274.677	212.615
521.652	3317.17	1968.89	397.423	271.887	195.809
523.651	3311.3	2085.32	365.453	263.204	188.157
525.65	3294.53	2182.14	319.166	254.049	170.351
527.648	3296.44	2279.63	291.389	246.468	144.278
529.647	3334.37	2347.16	283.304	215.971	126.355
531.646	3390.86	2388.43	267.493	185.817	135.368
533.644	3476.9	2404.09	259.786	176.862	149.078
535.643	3565.54	2403.08	259.68	183.346	164.508
537.642	3662.09	2412.7	249.136	198.767	169.923
539.64	3714.21	2417.66	239.043	227.155	174.837
541.639	3755.94	2409.66	256.859	259.783	177.456
543.638	3783.18	2421.42	287.829	284.402	172.387
545.636	3795.55	2454.6	319.146	306.164	152.939
547.635	3786.33	2487.33	338.449	315.554	124.501
549.634	3750.18	2533.37	371.384	302.329	107.84
551.632	3716.82	2590.59	425.739	290.376	101.326
553.631	3691.95	2650.85	468.58	257.598	119.711
555.63	3692.85	2703.66	509.386	224.467	152.43
557.628	3702.23	2759.89	560.288	221.69	186.762
559.627	3694.5	2804.62	594.406	228.803	215.6
561.626	3684.02	2851.02	628.527	240.31	228.561
563.624	3704.99	2888.2	646.148	256.416	230.594
565.623	3752.35	2908.3	643.274	276.015	242.862
567.622	3751.95	2913.16	651.539	284.529	248.651
569.62	3737.71	2933.79	701.208	286.703	260.821
571.619	3709.86	2955.43	763.835	298.648	257.239
573.618	3677.92	2972.77	824.072	308.012	251.54
575.616	3638.57	2984.22	874.035	313.381	259.244
577.615	3612.25	2994.09	918.081	309.278	254.072
579.614	3607.1	3001.14	962.62	327.921	251.842
581.612	3583.91	3019.89	994.142	361.781	251.449
583.611	3570.02	3048.73	1026.53	388.833	238.951
585.61	3567.9	3080.48	1070.35	400.111	231.669
587.608	3556.25	3112.61	1124.62	407.706	220.759
589.607	3539.3	3143.94	1175.7	386.25	189.007
591.606	3546.67	3165.08	1231.24	351.632	142.785
593.604	3573.04	3185.8	1275.94	340.23	95.0631
595.603	3630.49	3191.83	1324.98	343.647	76.5429
597.602	3703.1	3183.28	1387.43	348.882	77.121
599.6	3796.25	3158.14	1441.48	367.243	85.7495
601.599	3886.6	3144.32	1511.15	390.764	102.69
603.598	3957.62	3134.52	1582.34	406.2	126.602
605.596	4025.82	3129.8	1641.2	400.967	152.947
607.595	4074.96	3129.34	1682.64	383.79	167.428
609.594	4077.29	3141.44	1725.59	356.235	184.905
611.592	4044.2	3172.33	1765.13	341.931	202.163
613.591	3977.58	3199.01	1793.32	358.964	214.789
615.59	3888.83	3235.23	1820.86	398.689	214.268
617.588	3797.54	3276	1841.59	435.772	199.414
619.587	3720.26	3301.96	1860.64	460.153	181.775
621.586	3721.54	3329.78	1868.68	484.444	167.301
623.584	3728.15	3352.07	1901.3	489.8	170.101
625.583	3741.55	3351.05	1951.49	474.799	174.099
627.582	3771.49	3345.92	2009.83	473.766	178.6
629.58	3806.49	3344.42	2054.94	489.924	180.314
631.579	3858.23	3335.27	2106.23	494.186	174.092
633.578	3894.08	3322.16	2178.45	485.744	153.995
635.576	3923.39	3297.12	2250.03	453.644	121.947
637.575	3944.93	3280.15	2314.78	395.102	101.703
639.574	3975.84	3257.72	2374.13	352.049	81.6357
641.572	4010.2	3258.62	2420.16	330.553	76.7051
643.571	4034.85	3275.52	2458.9	334.179	76.0624
645.57	4046.22	3306.13	2490.44	349.907	79.0468
647.568	4044.53	3368.15	2540.45	369.995	81.6708
649.567	4037.4	3434	2597.06	385.064	82.7308
651.566	4016.67	3523.22	2659.07	408.726	87.5003
653.564	3999.19	3611.28	2718.43	436.164	108.055
655.563	3974.02	3673.77	2785.87	465.073	135.7
657.562	3950.68	3725	2853.87	521.503	152.959
659.56	3940.54	3764.62	2921.61	592.001	166.855
661.559	3945.81	3789.94	2994.65	658.012	183.015
663.558	3966.41	3788.19	3053.99	724.133	189.67
665.556	3978.33	3784.09	3104.46	779.678	190.442
667.555	4000.72	3791.01	3145.59	844.546	209.53
669.554	4032.22	3791.89	3169.42	921.278	208.173
671.552	4039.15	3759.46	3203.19	991.816	187.699
673.551	4041.16	3715.9	3227.61	1055.66	183.511
675.55	4057.39	3685.99	3235.14	1124.51	185.517
677.548	4078.59	3648.44	3226.28	1183.93	168.746
679.547	4127.37	3592.08	3218.16	1227.97	165.839
681.546	4184.58	3531.93	3233.35	1267.87	166.707
683.544	4251	3508.83	3268.87	1320.16	160.457
685.543	4328.94	3522.18	3307.64	1362.83	172.368
687.542	4426.29	3538.19	3330.02	1384.46	183.572
689.54	4527.29	3553.41	3358.15	1397.61	179.148
691.539	4642.25	3574.45	3382.5	1417.24	173.51
693.538	4798.19	3601.33	3395.29	1455.81	190.414
695.536	4977.45	3623.37	3395.62	1468.38	218.146
697.535	5120.4	3672.37	3359.47	1481.79	238.212
699.534	5237.37	3771.25	3308.11	1501.24	247.782
701.532	5345.61	3864.47	3281.99	1517.05	247.506
703.531	5424.09	3920.24	3262.99	1565.98	234.79
705.53	5478.14	3955.69	3229.45	1630.47	212.43
707.528	5489.86	3963.95	3203.32	1690.51	209.353
709.527	5463.13	3943.42	3196.07	1750.24	195.394
711.526	5390.42	3892.18	3197.5	1798.66	170.078
713.524	5290.49	3841.64	3199.93	1854.01	168.52
715.523	5157.72	3789.89	3186.1	1919.91	171.503
717.522	5028.07	3765.76	3157.71	1977.24	175.172
719.52	4911.24	3742.44	3144.42	2052.15	171.549
721.519	4780.15	3737.46	3163.22	2138.15	169.098
723.518	4649.51	3731.45	3197.3	2215.85	197.009
725.516	4536.85	3734.73	3228.05	2295.1	230.061
727.515	4413.63	3730.86	3253.26	2353.33	259.329
729.514	4280.22	3715.41	3284.33	2399.76	281.737
731.512	4175.05	3689.01	3307.8	2429.81	291.142
733.511	4100.95	3682.76	3309.33	2447.25	286.734
735.51	4068.28	3703.04	3306.57	2434.81	301.212
737.508	4074.34	3745.12	3322.4	2428.1	338.647
739.507	4082.39	3801.19	3332.39	2447.74	376.621
741.506	4075.66	3860.83	3320.05	2494.46	419.717
743.504	4069.8	3915.75	3302.46	2542.78	466.255
745.503	4058.1	3961	3303.82	2590.28	500.418
747.502	4033.79	4006.2	3293.54	2626.56	554.721
749.5	3982.81	4050.21	3287.83	2665.48	629.057
751.499	3921.63	4077.41	3286.47	2698.94	699.445
753.498	3871.62	4104.87	3304.31	2718.37	775.249
755.496	3836.4	4160.25	3321.59	2745.45	845.013
757.495	3850.26	4266.53	3333.05	2763.49	905.333
759.494	3896.04	4369.58	3322.12	2804.22	965.39
761.492	3931.32	4466.61	3287.11	2860.33	1004.94
763.491	3971.32	4532.09	3262.7	2907.94	1051.39
765.49	3989.2	4573.53	3250.56	2949.64	1107.95
767.488	3974.73	4590.77	3250.03	2975.48	1153.81
769.487	3948.55	4585.01	3256.11	2980.49	1206.16
771.486	3905.44	4535.6	3290.22	2986.12	1259.2
773.484	3865.57	4465.99	3320.26	2972.22	1288.59
775.483	3827.96	4406.57	3346.52	2964.97	1326.65
777.482	3806.86	4356.15	3364.3	2971.08	1386.97
779.48	3801.24	4333.55	3398.32	2962.13	1432.48
781.479	3826.32	4288.54	3432.89	2971.81	1463.78
783.478	3889.74	4245	3451	3012.33	1510.63
785.476	3976.09	4214.53	3468.12	3057.47	1545.78
787.475	4046.41	4162.08	3482.83	3093.6	1589.92
789.474	4098.76	4091.32	3504.12	3121.08	1640.02
791.472	4150.39	4037.48	3522.42	3148.49	1692.08
793.471	4193	3995.65	3529.99	3181.45	1767.68
795.47	4231.53	3968.14	3519.45	3196.87	1844.71
797.468	4271.13	3969.93	3497.09	3194.55	1921.12
799.467	4298.02	3958.39	3473.55	3162.22	1982.33
801.466	4294.62	3922.03	3450.3	3128.52	2039.73
803.464	4291.64	3909.18	3456.96	3117.47	2106.11
805.463	4299.77	3896.51	3481.95	3124.8	2172.01
807.462	4296.59	3864.57	3498.17	3139.2	2220.78
809.46	4268.32	3830.27	3507.52	3160	2268.56
811.459	4215.58	3819.37	3540	3182.43	2298.29
813.458	4137.61	3820.16	3588.27	3218.06	2340.45
815.456	4059.7	3815.84	3642.37	3263.23	2392.73
817.455	4001.58	3823.87	3706.32	3290.07	2429.26
819.454	3974.47	3857.99	3756.1	3310.93	2450.22
821.452	3998.24	3893.66	3801.86	3305.97	2463.65
823.451	4043.05	3915.7	3843.63	3272.74	2470.49
825.45	4132.35	3946.41	3887.57	3244.21	2488.8
827.448	4271.65	3993.54	3930.34	3211.71	2521.72
829.447	4467.6	4052.43	3985.54	3193.5	2554.79
831.446	4706.28	4095.4	4029.93	3191.87	2588.53
833.444	4997.55	4127.36	4056.34	3211.28	2615.78
835.443	5212.73	4138.04	4062.87	3247.08	2640.43
837.442	5294.78	4155.03	4030.96	3291.89	2670.99
839.44	5280.71	4155.31	3979.39	3330.96	2691.04
841.439	5203.71	4155.87	3935.67	3373.82	2704.59
843.438	5232.08	4184.63	3899.43	3409.73	2716.36
845.436	5250.31	4232.98	3888.59	3469.52	2701.45
847.435	5278.5	4289.51	3867.84	3540.03	2680.1
849.434	5275.27	4329.34	3824.19	3591.06	2673.25
851.432	5233.51	4352	3786.77	3618.54	2671.47
853.431	5146.53	4363.03	3735.85	3615.04	2676.83
855.43	5052.24	4378.79	3681.05	3583.1	2683.42
857.428	4969.25	4428.04	3646.87	3531.21	2682.58
859.427	4889.75	4504.51	3627.61	3481.53	2703.09
861.426	4789.24	4608.63	3636.48	3437.92	2730.57
863.424	4673.93	4708.63	3663.19	3412.28	2746.85
865.423	4563.41	4801.24	3700.9	3406.64	2767.97
867.422	4475.79	4878.65	3770.45	3410.76	2823.08
869.42	4452.08	4920.95	3858.39	3432.87	2890.35
871.419	4482.16	4945.09	3968.57	3450.78	2945.66
873.418	4552.9	4945.23	4106.24	3489.27	2991.12
875.416	4657.8	4934.42	4266.57	3573.37	3025.74
877.415	4801.24	4882.04	4451.82	3705.1	3049.51
879.414	4913.36	4817.57	4641.37	3887.28	3043.57
881.412	4977.44	4772.9	4837.5	4123.99	3040.33
883.411	5012.93	4730.71	5021.71	4418.78	3065.57
885.41	4976.02	4728.71	5163.99	4803.49	3094.12
887.408	4902.14	4740.88	5278.69	5173.82	3113.86
889.407	4774.39	4739.88	5356.04	5472.3	3105.17
891.406	4621.34	4715.19	5388.84	5704.73	3080.84
893.404	4465.15	4674.24	5373.12	5878.42	3056.78
895.403	4338.82	4617.03	5291.23	5957.88	3030.27
897.402	4253.93	4575.97	5147.04	5968.04	3010.6
899.4	4216.78	4543.04	4963.87	5878.64	2970.17
901.399	4177.5	4546.73	4778.95	5681.87	2926.74
903.398	4142.83	4604.92	4603.38	5395.5	2895.4
905.396	4088.47	4722.77	4469.22	5035.76	2882.64
907.395	4019.21	4858.4	4366.44	4624.33	2880.54
909.394	3965.92	4994.96	4307.35	4247.36	2874.29
911.392	3925.01	5072.31	4285.51	3991.41	2877.35
913.391	3894.64	5114.38	4318.87	3808.55	2877.53
915.39	3886.27	5117.73	4372.72	3651.44	2864.47
917.388	3868.22	5082.75	4404.88	3532.5	2867.39
919.387	3838.62	4995.73	4423.56	3464.64	2896.89
921.386	3808.21	4859.64	4420.19	3430.15	2929.11
923.384	3801.44	4712.9	4409	3405.41	2965.19
925.383	3821.08	4554.28	4373.68	3384.04	2984.72
927.382	3846.41	4441.78	4336.43	3354.62	2989.81
929.38	3855.92	4380.25	4340.77	3303.29	2998.01
931.379	3879.11	4342.82	4387.66	3242.57	3010.7
933.378	3928.02	4375.41	4536.32	3218.63	3016.06
935.376	3960.9	4394.59	4731.23	3219.06	3011.3
937.375	3981.71	4412.36	4912.69	3227.61	3025.01
939.374	3986.04	4416.09	5119.03	3216.85	3047.98
941.372	3965.22	4407.63	5354.48	3192.35	3059
943.371	3910.58	4381.04	5636.44	3172.81	3053.95
945.37	3831.67	4358.53	5946.76	3161.84	3043.8
947.368	3774.73	4352.05	6246.46	3176.5	3045.06
949.367	3742.5	4362.41	6551.42	3195.96	3023.82
951.366	3732.01	4394.19	6830.73	3210.3	3003.76
953.364	3734.59	4407.57	7094.11	3208	3000.15
955.363	3749.55	4396.68	7329.39	3215.14	3008.19
957.362	3757.75	4352.88	7537.26	3250.95	3008.64
959.36	3759.16	4270.76	7722.56	3302.28	2985.95
961.359	3750	4163.75	7876.05	3350.59	2960.3
963.358	3765.96	4055.68	7995.38	3409.36	2958.43
965.356	3805.85	3947.62	8080.73	3452.33	2962.58
967.355	3841.56	3914.33	8120.99	3481.36	2962.16
969.354	3870.77	3908.91	8098.87	3511.26	2953.02
971.352	3912.09	3894.11	8036.58	3514.01	2970.75
973.351	3950.12	3887.04	7924.03	3502.31	3008.56
975.35	3982.17	3890.01	7746.19	3447.45	3049.25
977.348	4022.71	3892.19	7514.04	3369.79	3086.1
979.347	4075.06	3880.92	7227.73	3310.99	3101.44
981.346	4135.2	3851.94	6908.4	3269.88	3127.66
983.344	4176.76	3829.77	6583.38	3261.72	3155.61
985.343	4211.5	3827.24	6273.78	3278.35	3177.67
987.342	4248.87	3842.78	5986.99	3311.46	3210.6
989.34	4270.35	3867.75	5715.55	3362.04	3277.81
991.339	4290.48	3883.91	5490.17	3443.06	3348.52
993.338	4295.26	3880.05	5326.75	3542.35	3404.43
995.336	4282.19	3873.03	5135.63	3656.82	3463.71
997.335	4248.77	3853.3	4924.61	3782.44	3529.78
999.334	4210.98	3847.62	4729.71	3888.86	3576.54
1001.33	4163.91	3858.88	4565.48	3958.15	3599.95
1003.33	4120.55	3878.54	4448.66	3978.87	3610.83
1005.33	4082.6	3884.98	4314.62	3969.35	3581.26
1007.33	4025.25	3887.4	4159.55	3936.76	3532.97
1009.33	3973.7	3873.98	4025.1	3901.63	3503.53
1011.33	3921.96	3850.87	3912.94	3843.7	3481.72
1013.32	3899.14	3861.32	3841.3	3754.46	3460.6
1015.32	3879.83	3901.72	3810.43	3656.3	3453.74
1017.32	3865.14	3985.21	3811.95	3578.4	3447.26
1019.32	3849.81	4097.95	3835.85	3527.66	3467.3
1021.32	3818.37	4258.98	3874.93	3485.93	3499.72
1023.32	3800.75	4443.14	3938.96	3419.27	3528.02
1025.32	3793.4	4635.28	3987.11	3355.41	3530.77
1027.32	3788.68	4823.32	4022.67	3330.03	3513.67
1029.31	3791.93	4993.01	4043.95	3315.21	3473.59
1031.31	3797.92	5171.83	4046.17	3297.87	3428.52
1033.31	3819.56	5349	4017.88	3291.29	3371.08
1035.31	3855.83	5531.76	3990.06	3286.84	3318.13
1037.31	3909.27	5717.88	3990.54	3284.01	3290.05
1039.31	3965.08	5893.77	3994.71	3291.6	3285.27
1041.31	4031.08	6067.84	3963.81	3307.67	3300.58
1043.3	4087.89	6232.49	3919.09	3310.6	3313.71
1045.3	4141.76	6365.41	3874	3324.92	3350.77
1047.3	4197.42	6466.43	3858.67	3348.69	3393.92
1049.3	4268.28	6518.42	3838.21	3406.73	3424.86
1051.3	4404.28	6533.4	3800.55	3476.02	3438.63
1053.3	4591.89	6506.35	3725.87	3550.35	3434.52
1055.3	4804.74	6466.46	3640.55	3622.13	3397.94
1057.3	5050.03	6406.51	3588.53	3693.36	3342.99
1059.29	5290.85	6341.07	3567.75	3739.71	3306.22
1061.29	5492.93	6271.32	3566.32	3766.95	3263.26
1063.29	5686.74	6178.38	3575.35	3765.78	3227.38
1065.29	5888.47	6092.63	3579.9	3741.92	3222.23
1067.29	6073.73	5994.45	3586.63	3710.08	3222.03
1069.29	6243	5889.72	3571.23	3679.1	3221.29
1071.29	6361.62	5792.31	3555.87	3637.67	3241.6
1073.28	6427.95	5712.78	3562.17	3605.48	3273.45
1075.28	6433.94	5670.8	3571.69	3595.91	3323.58
1077.28	6374.06	5609.37	3603.6	3593.09	3384.38
1079.28	6271.94	5533.62	3654.8	3606.26	3444.53
1081.28	6149.93	5441.93	3750.49	3617.65	3501.19
1083.28	6047.49	5297.62	3854.84	3616.84	3558.53
1085.28	5953.46	5114.13	3922.93	3628.09	3590.96
1087.28	5818.9	4928.15	3976.42	3624.48	3603.45
1089.27	5656.24	4733.62	4017.4	3604.56	3578.56
1091.27	5482.6	4570.61	4046.71	3575.91	3521.35
1093.27	5319.77	4438.89	4044.48	3548.2	3461.89
1095.27	5174.48	4311.17	4034.25	3542.05	3382.72
1097.27	5072.04	4224.15	4044.48	3541.5	3314.87
1099.27	5013.42	4173.65	4043.44	3539.64	3246.97
1101.27	4927.75	4136.77	4013.69	3532.3	3234.83
1103.26	4820.34	4099.66	3958.97	3521.69	3229.62
1105.26	4689.82	4103.94	3912.86	3513.39	3206.44
1107.26	4549.34	4152.63	3861.32	3495.58	3181.68
1109.26	4398.18	4212.44	3820.65	3495.9	3149.59
1111.26	4268.3	4286.14	3774.32	3505.43	3133.54
1113.26	4218.81	4386.57	3767.17	3496.46	3134.88
1115.26	4164.15	4495.58	3813.09	3480.92	3160.66
1117.26	4116.19	4623.02	3869.5	3488.16	3208.22
1119.25	4100.95	4705.32	3921.13	3493.35	3267.37
1121.25	4099.23	4758.78	3982.4	3508.83	3362.61
1123.25	4114.46	4778.57	4030.98	3536.09	3463.83
1125.25	4137.6	4774.93	4055.31	3569.09	3557.76
1127.25	4158.84	4723.83	4054.13	3613.83	3638.32
1129.25	4157.91	4628.16	4017.77	3620.81	3689.77
1131.25	4153.11	4520.51	3949.91	3597.05	3716.45
1133.24	4132.5	4400.24	3845.57	3537.4	3707.67
1135.24	4084.19	4285.58	3745.97	3473.1	3659.1
1137.24	4006.61	4177.26	3663.26	3410.82	3597.78
1139.24	3931.19	4097.44	3616.48	3368.14	3535.88
1141.24	3860.57	4047.76	3597.53	3355.32	3469.07
1143.24	3819.39	3992.04	3578.27	3342	3406.09
1145.24	3828.21	3933.1	3560.41	3346.48	3357.48
1147.24	3839.01	3880.58	3576.67	3373.45	3316.51
1149.23	3838.85	3857.5	3627.99	3399.48	3249.44
1151.23	3846.4	3852.64	3684.68	3428.62	3162.38
1153.23	3863.83	3844.3	3733.21	3487.99	3090.95
1155.23	3874.68	3840.54	3786.6	3572.52	3024.97
1157.23	3865.77	3848.89	3825.97	3646.53	2966.88
1159.23	3866.1	3888.93	3842.79	3705.82	2930.73
1161.23	3871.58	3936.08	3836.63	3752.43	2917.67
1163.22	3872.32	3996.76	3808.31	3763.8	2912.96
1165.22	3857.36	4060.33	3735.66	3741.29	2915.5
1167.22	3815.65	4097.73	3650.39	3689.83	2931.05
1169.22	3772.23	4093.62	3584.97	3613.36	2944.48
1171.22	3740.32	4067.01	3545.21	3555.21	2941.86
1173.22	3729.55	4013.33	3520.7	3525.65	2955
1175.22	3755.69	3970.03	3520.48	3542.25	2964.89
1177.22	3771.51	3956.67	3558.24	3580.71	2976.59
1179.21	3777.6	3963.43	3603.44	3622.24	3001.92
1181.21	3782.69	3974.19	3650.33	3662.73	3013.72
1183.21	3820.05	3998.52	3708.88	3692.35	2997.31
1185.21	3880.79	4018.07	3760.77	3703.16	2982.54
1187.21	3940.98	4021.35	3798.42	3716.1	2989.78
1189.21	4020.7	4008.87	3813.86	3717.97	3009.39
1191.21	4085.98	4003.79	3794.89	3718.19	3026.74
1193.2	4133.97	4032.76	3750.14	3722.23	3036.83
1195.2	4165.96	4083.2	3669.63	3745.86	3040.02
1197.2	4177.55	4169.14	3586.96	3787.41	3046.25
1199.2	4163.53	4290.51	3532.64	3867.54	3044.84
1201.2	4129.22	4439.16	3517.26	3974.68	3035.34
1203.2	4116.87	4564.92	3516.05	4057	3037.92
1205.2	4145.68	4642.9	3520.71	4111.63	3050.32
1207.2	4222.06	4695.49	3547.45	4130.1	3086.2
1209.19	4296.23	4709.65	3583.65	4118.19	3128.19
1211.19	4357.2	4688.27	3630.31	4062.24	3162.57
1213.19	4420.82	4619.27	3675.67	3953.83	3191.59
1215.19	4480.15	4517.05	3708.14	3824.63	3239.95
1217.19	4522.91	4411.92	3731.97	3688.71	3306.92
1219.19	4546.87	4299	3762.26	3553.68	3371.56
1221.19	4551.78	4223.22	3788.65	3441.95	3448.05
1223.18	4525.3	4217.39	3814.68	3398.3	3530.85
1225.18	4461.44	4202.42	3817.58	3364.01	3613.03
1227.18	4371.8	4191.58	3807.78	3348.62	3678.18
1229.18	4286.18	4182.41	3777.7	3327.63	3739.64
1231.18	4203.36	4174.91	3763.33	3323.42	3782.72
1233.18	4125.93	4162.4	3780.84	3329.96	3810.68
1235.18	4074.69	4132.08	3811.55	3328.13	3850.53
1237.18	4041.24	4082.82	3845.18	3333.78	3891.64
1239.17	4027.68	4055.73	3861.56	3350.93	3916.63
1241.17	4019.19	4029.79	3868.25	3347.3	3924.17
1243.17	4004.1	4012.18	3850.37	3350.8	3894.99
1245.17	4005.32	4002.13	3804.21	3362.78	3847.08
1247.17	4010.92	4030.37	3764.74	3386.05	3800.56
1249.17	3999.64	4072.36	3758.64	3440.52	3765.78
1251.17	3986.52	4116.75	3782.51	3540.34	3731.72
1253.16	3967.92	4175.28	3799.8	3685.76	3698.24
1255.16	3955.23	4244.31	3809.39	3883.36	3641.16
1257.16	3983.02	4333.08	3791.46	4123.07	3543.5
1259.16	4034.77	4454.42	3754.06	4408.53	3441.77
1261.16	4102.65	4589.7	3719.85	4669.69	3360.54
1263.16	4157.62	4702.3	3714.31	4922.83	3303.02
1265.16	4178.37	4783.57	3691.45	5093.32	3288.03
1267.16	4182.45	4839.08	3668.78	5211.06	3269.53
1269.15	4175.15	4872.53	3661.66	5281.34	3228.61
1271.15	4175.61	4889.17	3656.45	5302.04	3180.31
1273.15	4170.02	4867.58	3647.72	5258.57	3156.91
1275.15	4211.73	4808.17	3647.72	5135.79	3133.17
1277.15	4220.07	4691.49	3649.42	4963.33	3097.97
1279.15	4183.3	4553.47	3635.54	4771.46	3068.86
1281.15	4122.11	4438.11	3628.39	4571.08	3032.6
1283.14	4047.77	4353.04	3624.64	4377.94	3000.99
1285.14	3987.99	4371.58	3615.15	4221.8	2996.49
1287.14	3966.85	4439.39	3594.07	4109.44	3015.41
1289.14	3988.22	4544.24	3584.98	4099.6	3045.96
1291.14	4023.76	4655.64	3588.58	4181.2	3088.04
1293.14	4065.93	4795.22	3588.25	4354.24	3159.02
1295.14	4121.18	4972.2	3560.06	4609.16	3217.64
1297.14	4189.29	5191.23	3529.07	4922.24	3261.08
1299.13	4298.74	5425.77	3486.85	5242.91	3288.9
1301.13	4452.76	5667.77	3421.48	5541.22	3305.98
1303.13	4676.53	5856.46	3366.16	5801.58	3290.84
1305.13	4972.78	6045.84	3335.71	5995.34	3271.07
1307.13	5343.68	6193.83	3322.53	6160.73	3277.85
1309.13	5698.51	6310.34	3306.6	6298.07	3287.01
1311.13	6085.96	6398.16	3295.44	6410.96	3315.74
1313.12	6477.48	6449.6	3298.31	6461.63	3378.34
1315.12	6843.73	6447.89	3298.87	6457.13	3442.54
1317.12	7186.23	6392.27	3291.38	6383.86	3477.87
1319.12	7458.06	6303.36	3299.59	6206.24	3485.61
1321.12	7674.52	6177.52	3340.79	5939.74	3467.18
1323.12	7886.08	6018.77	3400.07	5607.77	3403.64
1325.12	8095.45	5816.49	3448.35	5215.78	3330.58
1327.12	8285.82	5596.27	3491.55	4883.91	3280.34
1329.11	8440.28	5357.8	3542.21	4599.97	3247.19
1331.11	8573.58	5148.7	3577.27	4379.98	3232.71
1333.11	8680.23	5004.65	3577.61	4256.86	3255.83
1335.11	8747.34	4986.06	3548.93	4189.28	3295.51
1337.11	8770.8	4983.25	3484.59	4151.64	3327.85
1339.11	8741.54	4993.79	3417.65	4145.54	3341.79
1341.11	8659.03	5016.82	3373.25	4141.85	3320.72
1343.1	8538.12	5052.85	3344.02	4143.39	3274.02
1345.1	8356.08	5090.1	3321.48	4156.17	3192.73
1347.1	8107.44	5134.48	3295.71	4144.88	3112.34
1349.1	7806.62	5211.11	3289.65	4110.76	3050.62
1351.1	7480.81	5270.67	3303.36	4050.83	3007.42
1353.1	7129.37	5274.66	3322.02	3990.98	2988.42
1355.1	6734.26	5240.14	3357.86	3934.03	2985.19
1357.1	6313.71	5160.19	3388.73	3888.99	2998.31
1359.09	5879.87	5060.52	3443.2	3875.99	3007.72
1361.09	5491.08	4937.71	3524.74	3901.44	3012.33
1363.09	5157.9	4814.06	3601.76	3967.21	3006.49
1365.09	4900.78	4703.83	3666.58	4037.62	3000.4
1367.09	4668.39	4605.06	3708.04	4113.37	3032.61
1369.09	4464.55	4565.66	3727.48	4185.72	3092.02
1371.09	4296.83	4568.95	3732.07	4245.36	3174.65
1373.08	4175.89	4575.27	3711.49	4295.42	3274.35
1375.08	4086.72	4569.45	3675.91	4324.07	3372.13
1377.08	4042.19	4538.65	3606.62	4345.18	3497.75
1379.08	4037.59	4485.4	3544	4342.55	3633.59
1381.08	4042.31	4407.01	3498.89	4309.01	3764.72
1383.08	4045.42	4334.48	3440.58	4261.92	3893.3
1385.08	4048.34	4273.79	3406.16	4185.19	3973.11
1387.08	4043.02	4247.14	3404.2	4099.16	4026.97
1389.07	4020.57	4240.18	3414.47	4004.48	4043.44
1391.07	3977.56	4264.63	3420.55	3933.99	4015
1393.07	3942.04	4327.01	3438.17	3888.82	3933.68
1395.07	3942.24	4406.41	3453.08	3831.2	3836.34
1397.07	3978.92	4480.75	3455.04	3767.08	3744.1
1399.07	4005.96	4559.72	3442.83	3696.42	3680.2
1401.07	4019.52	4643.38	3430.32	3643.13	3638.46
1403.06	4005.56	4736.26	3420.97	3610.78	3573.41
1405.06	3959.34	4828.57	3397.03	3571.26	3486.15
1407.06	3880.05	4923.06	3375.58	3534.13	3403.09
1409.06	3799.58	5016.49	3353.68	3511.99	3346.92
1411.06	3744.82	5118.54	3315.09	3493	3311.95
1413.06	3730.26	5244.56	3282.28	3473.29	3305.76
1415.06	3753.18	5357.58	3276.14	3459.53	3330.48
1417.06	3771.44	5462.18	3288.95	3452.84	3376.48
1419.05	3795.9	5524.9	3285.08	3445.04	3422.34
1421.05	3805.47	5540.07	3274.26	3429.27	3486.86
1423.05	3800.16	5508.88	3276.6	3416.59	3547.35
1425.05	3780.25	5429.76	3279.28	3402.08	3604.47
1427.05	3738.67	5310.44	3281.83	3372.25	3655.04
1429.05	3697.79	5200.99	3283.27	3365.37	3672.59
1431.05	3680.8	5121.18	3300.21	3367.95	3661.32
1433.04	3703.47	5124.23	3324.56	3369.82	3615.54
1435.04	3735.24	5160.12	3366.47	3377.47	3527.3
1437.04	3749.92	5181.66	3406.44	3387.91	3433.57
1439.04	3775.9	5188.25	3447.41	3394.76	3350.38
1441.04	3808.9	5182.97	3482.92	3410	3287.95
1443.04	3819.3	5146.79	3543.56	3415.86	3262.42
1445.04	3817.3	5093.77	3596.49	3394.68	3252.01
1447.04	3810.61	5033.5	3639.41	3366.66	3254.95
1449.03	3799.5	4929.09	3658.92	3360.72	3279.69
1451.03	3807.87	4808.37	3657.98	3363.39	3316.36
1453.03	3818.8	4717.28	3641.03	3373.04	3364.01
1455.03	3823.99	4651.91	3627.46	3384.82	3422.52
1457.03	3821.4	4668.82	3610.73	3403.78	3487.46
1459.03	3842.75	4676.58	3600.34	3460.88	3575.79
1461.03	3892.68	4680.16	3607.28	3558.39	3726.43
1463.02	3986.18	4674.17	3600.81	3676.13	3944.73
1465.02	4090.56	4666.39	3568.1	3820.26	4219.95
1467.02	4185.98	4630.99	3518.33	3954.14	4549.67
1469.02	4264.49	4582.99	3484.81	4085.97	4933.58
1471.02	4306.15	4543.73	3452.35	4226.01	5305.4
1473.02	4298.99	4547.82	3422.72	4362.32	5624.36
1475.02	4254.82	4590.18	3404.66	4463.12	5890.29
1477.02	4167.22	4644.97	3388.79	4532.42	6103.9
1479.01	4044.85	4669.13	3382.45	4630.54	6275.16
1481.01	3905.45	4679.5	3366.37	4687.68	6390.14
1483.01	3787.28	4672.86	3336.03	4704.55	6445.34
1485.01	3690.13	4665.44	3327.07	4668.61	6425.34
1487.01	3642.05	4667.17	3347.13	4589.79	6314.52
1489.01	3602.69	4684.5	3368.38	4478.76	6123.62
1491.01	3601.38	4694.27	3394.83	4334.95	5866.89
1493	3618.46	4657.61	3420.33	4173.07	5541.21
1495	3643.46	4583.63	3419.17	3993.69	5154.63
1497	3652.25	4475.36	3409.85	3849.11	4781.8
1499	3657.9	4363.72	3396	3722.36	4466.68
1501	3664.29	4238.91	3389.3	3615.76	4235.76
1503	3646.97	4143.16	3384.75	3523.11	4056.23
1505	3600.5	4073.78	3390.98	3461.24	3912.64
1507	3540.82	4058.35	3397.03	3418.08	3801.52
1508.99	3486.91	4071.72	3390.82	3388.87	3700.85
1510.99	3467.86	4090.29	3370.85	3361.04	3610.44
1512.99	3465.39	4146.24	3381.73	3340.16	3526.14
1514.99	3483.39	4220.21	3410.08	3295.62	3450.06
1516.99	3499.04	4316.8	3446.55	3249.41	3381.94
1518.99	3542.65	4437.77	3489.6	3218.23	3350.88
1520.99	3608.17	4573.98	3534.15	3198.21	3366.9
1522.98	3662.96	4678.53	3576.69	3174.69	3417.6
1524.98	3724.71	4762.3	3640.87	3159.82	3475.56
1526.98	3797.07	4827.42	3753.82	3155.99	3530.56
1528.98	3862.37	4886.05	3877.45	3182.71	3575.02
1530.98	3900.91	4917.67	4009.38	3248.88	3615.26
1532.98	3926.91	4922.12	4091.84	3362.64	3640.53
1534.98	3925.64	4930.05	4131.31	3562.18	3654.87
1536.98	3900.12	4902.87	4117.93	3838.38	3690.43
1538.97	3844.22	4849.11	4067.11	4176.86	3730.49
1540.97	3785.63	4789.92	3968.51	4583.56	3741.39
1542.97	3729.04	4763.27	3861.73	5015.04	3726.61
1544.97	3712.12	4707.41	3774.22	5397.33	3668.35
1546.97	3703.95	4602.98	3741.05	5718.33	3575.28
1548.97	3693.13	4469.13	3755.57	5977.86	3485.57
1550.97	3698.57	4334.74	3746.53	6196.41	3390.86
1552.96	3732.68	4195.96	3727.46	6368.65	3304.91
1554.96	3756.16	4114.25	3692.33	6489.14	3244.88
1556.96	3786.79	4080.75	3643.82	6561.02	3204.78
1558.96	3813.59	4051.65	3562.76	6561.67	3177.67
1560.96	3860.91	4019.15	3477.48	6474.02	3166.75
1562.96	3907.51	3972.46	3414.19	6305.8	3171.48
1564.96	3954.17	3899.81	3367.92	6061.49	3169.57
1566.96	4011.05	3834.05	3382.58	5767.08	3167.57
1568.95	4055.68	3792.91	3425.8	5414.61	3150.49
1570.95	4073.36	3762.16	3481.58	5041.53	3143.69
1572.95	4080.1	3728.15	3535.91	4713.96	3154.53
1574.95	4079.18	3701.12	3591.08	4447.08	3179.74
1576.95	4056.67	3701.67	3625.93	4229.42	3188.53
1578.95	3997.15	3726.91	3635.76	4083.05	3212.9
1580.95	3935.6	3762.39	3619.45	3977.83	3264.46
1582.94	3886.78	3834.55	3584.75	3898.26	3328.09
1584.94	3851.17	3930.65	3565.27	3845.56	3387.43
1586.94	3825.43	4045.53	3547.94	3789.25	3443.44
1588.94	3819.02	4149.45	3544.44	3737.11	3508.56
1590.94	3827.5	4214.78	3558.81	3686.77	3559.75
1592.94	3835.12	4254.37	3574.66	3642.63	3601.16
1594.94	3829.73	4267.89	3569	3633.26	3617.13
1596.94	3807.2	4269.77	3559.36	3654.36	3595.98
1598.93	3764.15	4231.39	3558.27	3679.51	3529.95
1600.93	3716.51	4177.04	3557.58	3708.27	3437.41
1602.93	3659.78	4151.03	3532.53	3764.36	3337.51
1604.93	3616.31	4152.34	3483.49	3863.03	3227.97
1606.93	3561.97	4220.94	3439.71	3962.27	3120.99
1608.93	3498.93	4314.54	3415.25	4072.98	3036.13
1610.93	3461.96	4427.77	3412.12	4174.85	2983.01
1612.92	3469.37	4572.44	3398.38	4206.91	2956.26
1614.92	3504.6	4738.54	3394.2	4164.39	2945.17
1616.92	3540.85	4908.72	3383.52	4081.06	2955.23
1618.92	3571.79	5057.65	3365.37	3952.45	2972.61
1620.92	3606.05	5210.67	3318.06	3821.99	2984.91
1622.92	3651.01	5334.62	3272.98	3705.2	3013.62
1624.92	3689.49	5423.06	3256.97	3643.49	3049.46
1626.92	3718.28	5465.19	3250.97	3610.47	3093.9
1628.91	3762.86	5451.21	3244.56	3564.84	3130.29
1630.91	3809.71	5379.06	3251.66	3536.31	3153.88
1632.91	3844.64	5240.48	3252.14	3522.11	3162.69
1634.91	3874.74	5059.92	3261.9	3508.33	3159.42
1636.91	3894.84	4859.07	3291.01	3491.97	3145.08
1638.91	3916.4	4647.69	3341.3	3474.96	3130.4
1640.91	3944.83	4475.08	3398.5	3464.73	3139.08
1642.9	3956.4	4321.65	3424.45	3453.42	3152.23
1644.9	3945.57	4208.87	3429.21	3440.84	3163.46
1646.9	3901.43	4161.55	3416.09	3451.98	3174.74
1648.9	3845.15	4128.31	3399.79	3492.56	3183.99
1650.9	3786.39	4094.21	3413.06	3547.27	3183.38
1652.9	3722.29	4085.65	3450.25	3600.03	3169.79
1654.9	3653.07	4128.06	3503.92	3640.26	3153.75
1656.9	3610.95	4192.1	3548.07	3673.16	3143.46
1658.89	3570.13	4248.34	3581.23	3701.54	3130.58
1660.89	3524.39	4294.33	3624.71	3694.43	3112.82
1662.89	3494.8	4307.53	3654.65	3669.84	3111.42
1664.89	3499.96	4277.44	3652.41	3618.88	3100.16
1666.89	3519.52	4223.72	3638.56	3564.75	3092.36
1668.89	3534.62	4138.24	3602.07	3500.45	3091.97
1670.89	3543.27	4058.31	3566.03	3454.74	3091.39
1672.88	3556.63	4001.36	3558.18	3403.83	3079.41
1674.88	3557.57	3974.97	3567.02	3367.71	3072.71
1676.88	3537.18	3968.79	3564.78	3345.74	3062.29
1678.88	3530.55	3992.71	3551.92	3339.19	3045.89
1680.88	3539.23	4050.27	3514.88	3336.34	3044.08
1682.88	3531.51	4106.99	3462.13	3338.01	3037.79
1684.88	3514.84	4171.47	3434.46	3338.16	3039.9
1686.88	3520.12	4234.95	3418.15	3365.27	3039.56
1688.87	3547.77	4309.38	3428.67	3415.3	3050.79
1690.87	3599.16	4374.28	3457.43	3483.88	3063.81
1692.87	3650.07	4431.47	3486.17	3573.94	3072.49
1694.87	3680.92	4463.82	3498.57	3668.7	3076.21
1696.87	3707.06	4464.27	3490.38	3770.84	3076.59
1698.87	3727.09	4423.8	3449.45	3863.15	3089.6
1700.87	3764.2	4359.7	3401.44	3954.47	3118.88
1702.86	3808.65	4279.85	3363.01	4036.64	3135.46
1704.86	3871.59	4168.45	3329.6	4098.06	3141.42
1706.86	3941.65	4056.56	3302.47	4158.28	3146.59
1708.86	3994.14	3965.01	3291.72	4194.5	3155.92
1710.86	4042.39	3891.28	3287.9	4195.53	3161.23
1712.86	4081.7	3851.28	3274.11	4149.09	3171.77
1714.86	4130.27	3805.67	3255.13	4073.18	3192.77
1716.86	4177.56	3756.73	3238.48	3951.98	3216.39
1718.85	4213.41	3738.45	3229.47	3801.76	3237.37
1720.85	4216.28	3731.11	3237.56	3640.01	3257.46
1722.85	4186.21	3747.25	3233.29	3510.71	3276.13
1724.85	4109.96	3759.45	3225.16	3432.96	3294.44
1726.85	4009.19	3780.66	3228.25	3363.79	3302.21
1728.85	3905.7	3832.27	3246.59	3313.77	3283.58
1730.85	3824.48	3900.86	3294.75	3294.29	3237.02
1732.84	3771.47	3978.35	3324.21	3304.78	3193.71
1734.84	3738.93	4042.15	3312.31	3334.4	3163.62
1736.84	3738.97	4090.27	3285.98	3352.17	3150.35
1738.84	3756.58	4126.11	3277.29	3373.93	3134.92
1740.84	3778.72	4144.77	3312.42	3397.48	3111.23
1742.84	3809.56	4150.09	3384.05	3427.32	3106.24
1744.84	3862.33	4167.16	3461.31	3448.34	3104.51
1746.84	3927.16	4186.41	3559.3	3478.61	3127.02
1748.83	3990	4211.57	3648.88	3526.49	3176.8
1750.83	4031.61	4242.53	3716.85	3572.36	3258.46
1752.83	4062.61	4270.42	3760.84	3611.65	3356.47
1754.83	4065.93	4301.63	3778.4	3664.63	3485.22
1756.83	4035.64	4359.34	3777.61	3724.48	3615.79
1758.83	3972.67	4403.74	3735.7	3769.77	3735.8
1760.83	3909.03	4430.91	3671.25	3782.1	3821.28
1762.82	3851.65	4437.54	3624.3	3760.67	3867.9
1764.82	3818.54	4425.99	3587.21	3703.31	3888.46
1766.82	3799.57	4378.59	3573.26	3634.81	3869.45
1768.82	3793.71	4312.99	3551.9	3574.71	3825.06
1770.82	3797.96	4254.58	3532.25	3519.97	3750.72
1772.82	3811.5	4190.59	3484.37	3520.58	3641.22
1774.82	3812.65	4150.19	3426.02	3525.57	3521.01
1776.82	3815.66	4105.48	3384.11	3516.51	3404.68
1778.81	3818.29	4032.03	3346.16	3482.46	3298.55
1780.81	3850.37	3943.68	3323.51	3440.09	3239.84
1782.81	3926.7	3869.91	3285.57	3409.16	3210.71
1784.81	4015.26	3803.28	3260.13	3366.12	3202.73
1786.81	4076.95	3775.68	3264.38	3337.23	3205.5
1788.81	4095.45	3775.3	3275.28	3328.83	3209.79
1790.81	4054.92	3769.85	3295.11	3341.31	3227.68
1792.8	3976.86	3772.82	3321.38	3340.85	3227
1794.8	3874.02	3778.09	3379.2	3333.23	3208.16
1796.8	3755.29	3777.93	3452.33	3339.67	3201.94
1798.8	3633.67	3749.7	3537.72	3321.3	3199.39
1800.8	3593.29	3696.8	3645.11	3300.35	3207.22
1802.8	3579.53	3630.28	3776.55	3273.55	3212.85
1804.8	3595.36	3574.21	3912.74	3244.96	3212.66
1806.8	3629.24	3546.44	4046.71	3238.21	3220
1808.79	3683.29	3537.01	4140.95	3229.68	3239.53
1810.79	3743.96	3546.98	4201.21	3228.7	3248.44
1812.79	3804.47	3585.17	4224.57	3242.16	3251.54
1814.79	3861.54	3635.35	4221.85	3257.61	3233.07
1816.79	3916.41	3706.47	4168.22	3257.37	3206.01
1818.79	4002.44	3784.16	4076.09	3249.09	3193.4
1820.79	4075.84	3824.55	3989.11	3226.74	3184.15
1822.78	4123.18	3844.59	3904.83	3217.2	3172.9
1824.78	4165.64	3843.35	3872.33	3198.7	3158.48
1826.78	4196.44	3846.87	3873.82	3200.96	3143.17
1828.78	4205.7	3845.13	3883.21	3215.03	3155.85
1830.78	4179.88	3844.64	3887.97	3221.88	3167.85
1832.78	4144.44	3830.03	3878.13	3223.51	3180.17
1834.78	4088.51	3819.83	3888.11	3223.76	3209.68
1836.78	4019.52	3797.36	3916.51	3234.87	3246.11
1838.77	3936.05	3788.44	3930.58	3259.06	3267.5
1840.77	3856.58	3806.72	3919.37	3314.77	3272.37
1842.77	3807.14	3859.41	3877.06	3420.44	3285.66
1844.77	3748.82	3925.75	3817.76	3564.78	3308.89
1846.77	3699.65	4019.18	3748.16	3768.78	3327.03
1848.77	3655.29	4156.32	3686.94	4026.33	3328.98
1850.77	3651.12	4330.18	3633.2	4340.46	3300.27
1852.76	3654.81	4468.7	3627.56	4728.35	3254.65
1854.76	3641.21	4587.07	3611.45	5159.41	3226.82
1856.76	3615.05	4683.41	3595.1	5578.12	3202.56
1858.76	3584.95	4759.37	3572.77	5960.15	3174.16
1860.76	3554.19	4797.87	3535.93	6290.21	3157.95
1862.76	3516.42	4779.1	3520.33	6572.52	3131.82
1864.76	3495.9	4724.02	3537.19	6802.49	3102.13
1866.76	3495.06	4662.58	3592.91	6973.53	3073.75
1868.75	3511.67	4590.07	3674.47	7084.47	3054.76
1870.75	3540.15	4493.66	3737.78	7128.38	3036.74
1872.75	3578.07	4390.41	3753.47	7086.22	3009.32
1874.75	3637.14	4293.51	3747.36	6951.35	2998.83
1876.75	3701.71	4199.34	3719.42	6726.46	3013.55
1878.75	3752.15	4132.19	3685.42	6427.75	3025.11
1880.75	3777.7	4089.34	3682.28	6063.03	3036.58
1882.74	3788.18	4049.21	3710.73	5648.51	3030.19
1884.74	3784.48	3992.11	3777.5	5225.38	3019.67
1886.74	3778.28	3924.19	3807.56	4893.22	3035.88
1888.74	3775.4	3875.46	3819.25	4625.38	3047.02
1890.74	3804.89	3833.77	3820.02	4410.48	3063.68
1892.74	3877.36	3845.61	3795.42	4274.76	3089.84
1894.74	3997.74	3867.94	3741.82	4149.14	3133.87
1896.74	4175.32	3874.82	3701.07	4016.45	3188.13
1898.73	4396.37	3878.72	3692.58	3895.53	3244.68
1900.73	4661.02	3867.72	3702.89	3815.53	3280.34
1902.73	4975.16	3836.98	3717.49	3764.77	3292.44
1904.73	5321.97	3799.36	3702.45	3753.52	3278.71
1906.73	5664.24	3781.2	3682.63	3740.92	3230.03
1908.73	5968.35	3767.03	3676.37	3720.79	3171.99
1910.73	6214.41	3760.63	3662.06	3701.29	3132.5
1912.72	6432.38	3742.55	3650.85	3685.67	3108.11
1914.72	6650.67	3729.51	3647.2	3669.38	3117.14
1916.72	6845.29	3734.86	3642.43	3641.22	3136.82
1918.72	7028.88	3744.09	3646.91	3590.14	3165.59
1920.72	7193.16	3738.85	3632.16	3538.42	3187.69
1922.72	7324.3	3745.66	3596.7	3506.98	3215.64
1924.72	7407.82	3775.12	3565.76	3480.34	3255.84
1926.72	7423.65	3807.16	3561.36	3474.76	3298.8
1928.71	7376.42	3846.77	3570.62	3482.98	3340.88
1930.71	7274.44	3873.55	3623.3	3489.77	3378.92
1932.71	7126.39	3891.33	3699.65	3504.45	3425.4
1934.71	6930.78	3922.46	3777.79	3539.4	3456.33
1936.71	6710.99	3949.23	3859.22	3534.68	3454.92
1938.71	6448.92	3959.46	3943.58	3516.84	3425.14
1940.71	6132.99	3950.11	4010.47	3473.59	3361.46
1942.7	5762.44	3907.37	4075.72	3437.18	3301.14
1944.7	5382.69	3863.77	4148.56	3413.29	3259.85
1946.7	5096.2	3847.78	4169.39	3395.97	3238.07
1948.7	4937.17	3847.44	4154.04	3408.73	3222.89
1950.7	4790.52	3910.04	4101.24	3444.02	3207.97
1952.7	4640.38	3991.86	4041.5	3479.58	3196.58
1954.7	4494.21	4082.17	3986.91	3533.26	3192.75
1956.7	4366.39	4172.6	3968.52	3590.18	3189.17
1958.69	4260.88	4254.92	3989.72	3656.49	3161.65
1960.69	4174.13	4328.94	4019.44	3720.5	3124.95
1962.69	4114.5	4393.28	4042.03	3769.68	3110.4
1964.69	4088.49	4422.33	4049.8	3807.77	3111.63
1966.69	4048.84	4405.05	4035.82	3829.99	3108.06
1968.69	4005.66	4342.94	4004.06	3822.75	3096.27
1970.69	3958.12	4229.89	3993.01	3798.34	3087.56
1972.68	3933.04	4097.91	4011.41	3765.59	3091.28
1974.68	3925.37	3971.35	4043.39	3739.2	3085.2
1976.68	3909.7	3872.04	4004.44	3726.2	3077.22
1978.68	3903.66	3788.98	3942.61	3733.73	3059.29
1980.68	3903.53	3741.9	3828.04	3734.53	3039.63
1982.68	3911.15	3690.95	3689.62	3733.34	3014.82
1984.68	3904.66	3671.76	3562.66	3719.14	3002.91
1986.68	3883.91	3680.9	3505.45	3672.57	2994.8
1988.67	3842.43	3703.47	3480.45	3598.5	2975.84
1990.67	3799.63	3714.66	3472.65	3532.56	2957.56
1992.67	3760	3736.98	3487.98	3473.82	2947.9
1994.67	3743.04	3767.05	3502.08	3410.06	2948.14
1996.67	3722.81	3801.19	3515.51	3362.26	2950.92
1998.67	3693.39	3829.98	3520.43	3320.5	2970.94
2000.67	3662.13	3861.54	3506.06	3298.45	2981.01
2002.66	3615.6	3885.69	3468.32	3305.83	2988.36
2004.66	3587.04	3913.15	3437.02	3335.28	2994.65
2006.66	3554.09	3934.89	3433.54	3379.54	3009.41
2008.66	3540.62	3938.53	3432.39	3431.31	3023.68
2010.66	3550.56	3950.41	3445.54	3468.69	3045.79
2012.66	3559.24	3987.93	3459.12	3479.39	3072.42
2014.66	3545.94	4030.32	3484.51	3477.21	3101.19
2016.66	3534.53	4067.84	3499.61	3448.97	3121.31
2018.65	3518.44	4103.45	3520.06	3389.36	3126.26
2020.65	3501.63	4116.3	3561.48	3344.44	3112.76
2022.65	3507.79	4142.92	3587.01	3316.57	3065.28
2024.65	3530.46	4197.5	3597.55	3316.25	3022.41
2026.65	3545.51	4256.06	3602.21	3336.33	3000.93
2028.65	3568.04	4254.43	3603.58	3358.34	2990.43
2030.65	3590.16	4200.69	3614.4	3383.81	2994.8
2032.64	3603.63	4129.49	3640.79	3401.96	3009.69
2034.64	3603.56	4080.16	3662.16	3422.68	3032.64
2036.64	3619.5	4086.71	3652.94	3446.97	3056.17
2038.64	3655.32	4134.42	3632.6	3470.38	3063.92
2040.64	3700.14	4196.85	3626.33	3496.59	3073.2
2042.64	3743.05	4212.91	3613.23	3533.94	3107.28
2044.64	3783.84	4257.17	3565.08	3552.95	3117.46
2046.64	3819.91	4303.35	3503.29	3564.94	3120.2
2048.63	3851.5	4356.96	3456.19	3565.02	3135.85
2050.63	3891.74	4397.84	3404.46	3537.41	3136.34
2052.63	3948.91	4458.08	3351.09	3495.6	3116.05
2054.63	4014.5	4511.51	3305.32	3463.21	3098.93
2056.63	4053.89	4522.58	3273	3435.45	3075.19
2058.63	4064.3	4498.15	3248.1	3416.47	3058.08
2060.63	4046.26	4459.09	3221.2	3391.58	3042.19
2062.62	4003.73	4384.83	3198.58	3358.74	3004.82
2064.62	3916.33	4268.07	3177.38	3329.16	2974.64
2066.62	3810.52	4145.4	3166.03	3326.05	2948.3
2068.62	3706.84	4049.41	3182.58	3321.23	2917.95
2070.62	3620.03	4017.12	3199.86	3334.53	2911.5
2072.62	3611.35	4047.51	3248.85	3358.51	2913.81
2074.62	3612.01	4093.63	3306.41	3404.35	2925.06
2076.62	3615.01	4142.52	3347.36	3467.69	2933.92
2078.61	3641.14	4137.15	3376	3509.8	2924.65
2080.61	3682.73	4080.61	3374.92	3534.11	2920.78
2082.61	3712.75	4100.41	3344.51	3546.3	2931.95
2084.61	3712.89	4105.41	3299	3531.09	2936.17
2086.61	3693.49	4085.51	3271.18	3484.53	2967.1
2088.61	3668.77	4050.05	3253.59	3440.85	3020.05
2090.61	3661.34	3999.56	3260.06	3415.5	3084.07
2092.6	3665.75	3963.16	3285.58	3408.5	3168.5
2094.6	3684.64	3931.2	3342.5	3390.08	3269.07
2096.6	3696.88	3926.01	3407.94	3383.39	3384.75
2098.6	3712.06	3902.35	3471.46	3415.74	3501.62
2100.6	3703.03	3857.63	3536.96	3450.4	3611.41
2102.6	3696.52	3805.21	3596.57	3493.26	3711.1
2104.6	3723.64	3777.92	3636.19	3562.29	3789.18
2106.6	3778.3	3770.13	3642.79	3641.54	3846.23
2108.59	3832.69	3803.04	3636.3	3711.66	3867.66
2110.59	3871.66	3850.72	3616.97	3780.33	3852.5
2112.59	3893.88	3899.61	3604.14	3840.66	3821.07
2114.59	3895.38	3971.96	3626.55	3874.78	3765.97
2116.59	3878.86	4096.62	3654.22	3884.13	3689.86
2118.59	3847.37	4229.79	3685.72	3883.57	3612.7
2120.59	3822.89	4339	3728.54	3869.67	3523.36
2122.58	3803.11	4431.27	3828.97	3849.84	3441.76
2124.58	3793.2	4471.19	3983.16	3808.91	3361.58
2126.58	3781.54	4482.43	4234.15	3780.66	3321.13
2128.58	3803.42	4451.75	4544.55	3772.45	3286.51
2130.58	3830.3	4383.89	4811.78	3778.99	3267.06
2132.58	3857.36	4271.43	5028.58	3779.11	3236.91
2134.58	3875.52	4156.34	5166.91	3777.08	3189.57
2136.58	3875.76	4055.24	5251.39	3782.44	3152.56
2138.57	3849.69	3999.69	5274.47	3766.73	3129.76
2140.57	3795.25	3961.55	5232.02	3744.06	3118.64
2142.57	3734.11	3930.03	5104.64	3701.92	3101.63
2144.57	3658.66	3902	4907.75	3630.31	3097.57
2146.57	3581.78	3886.13	4668.76	3560.93	3110.14
2148.57	3495.95	3876.6	4392.43	3501.85	3126.3
2150.57	3437.19	3857.41	4107.69	3472.67	3148.98
2152.56	3416.59	3819.08	3885.45	3472.21	3182.82
2154.56	3415.89	3788.73	3741.33	3465.4	3200.03
2156.56	3419.29	3798.28	3613.67	3481.86	3203.35
2158.56	3433.24	3831.92	3517.11	3526.45	3207.76
2160.56	3463.47	3875.56	3458.26	3564.95	3179.45
2162.56	3515.51	3937.99	3399.38	3588.71	3131.35
2164.56	3570.81	3998.23	3370.15	3582.76	3103.45
2166.56	3614.58	4028.44	3343.01	3543.96	3081.89
2168.55	3643.16	4068.4	3304.31	3497.1	3082.49
2170.55	3651.62	4103.98	3287.17	3447.73	3100.61
2172.55	3629.27	4124.15	3304.57	3399.31	3138.21
2174.55	3604.72	4147.94	3316.13	3360.46	3168.13
2176.55	3607.38	4140.44	3314.02	3341.26	3194.39
2178.55	3599.04	4124.47	3286.32	3323.72	3223.41
2180.55	3574.5	4134.55	3263.47	3310.5	3231.42
2182.54	3550.86	4159.92	3236.23	3290.08	3223.09
2184.54	3551.41	4182.01	3182.46	3253.87	3230.01
2186.54	3574.76	4193.15	3136.54	3237.14	3235.29
2188.54	3589.96	4182.66	3093.99	3237.21	3245.08
2190.54	3591.54	4186.83	3087.08	3223.74	3247.22
2192.54	3597.63	4212.68	3078.73	3217.16	3215.56
2194.54	3612.43	4199.1	3088.57	3230.79	3159.49
2196.54	3604.43	4152.28	3122.91	3257.41	3108.52
2198.53	3576.71	4069.24	3154.64	3291.64	3048.06
2200.53	3524.83	3980.93	3195.3	3317.54	2993.99
2202.53	3467.01	3878.52	3231.78	3344.97	2951.53
2204.53	3435.56	3795.39	3272.12	3350.97	2926.43
2206.53	3432.5	3710.54	3313.41	3336.08	2923.06
2208.53	3453.43	3657.9	3346.69	3337.51	2922.22
2210.53	3487.22	3618.43	3354.76	3345.72	2944.2
2212.52	3564.24	3587.23	3371	3322.74	2965.51
2214.52	3686.53	3590.85	3410.48	3283.16	2983.47
2216.52	3842.46	3614.27	3432.63	3258.61	3010.71
2218.52	4048.29	3625.28	3467.12	3244.25	3036.98
2220.52	4273.98	3645.8	3511.83	3236.97	3048.41
2222.52	4467.06	3677.28	3551.53	3221.11	3042.4
2224.52	4557.37	3715.57	3594.22	3219.29	3043.16
2226.52	4621.53	3765.39	3674.45	3232.46	3042.5
2228.51	4652.16	3860.89	3777.77	3238.33	3019.08
2230.51	4648.63	3989.95	3924.54	3233.87	2982.69
2232.51	4581.02	4138.57	4064.75	3231.16	2968.08
2234.51	4470.52	4240.24	4135.46	3224.05	2967.05
2236.51	4346.38	4327.79	4163.7	3220.56	2973.46
2238.51	4205.39	4419.06	4146.36	3226.51	2984.97
2240.51	4049.06	4497.66	4076.82	3221.62	3006.6
2242.5	3978.43	4589.56	3942.73	3214.95	3022.23
2244.5	3927.3	4669.57	3784.34	3236.09	3036.88
2246.5	3873.53	4762.17	3638.17	3279.9	3060.36
2248.5	3811.26	4908.52	3551.5	3359.97	3072.53
2250.5	3763.45	5096.65	3491.45	3439.76	3088.48
2252.5	3713.83	5318.12	3433.06	3518.31	3128.05
2254.5	3669	5468.01	3389.28	3587.37	3177.11
2256.5	3640.13	5595.4	3375.4	3636.33	3210.59
2258.49	3618.67	5691.77	3382.55	3667.08	3213.99
2260.49	3585.74	5755.66	3379.89	3686.01	3185.67
2262.49	3543.14	5773.98	3361.29	3680.74	3137.24
2264.49	3519.56	5744.04	3353.95	3659.94	3099.11
2266.49	3516.34	5652.33	3348.83	3592.99	3065.73
2268.49	3533.13	5516.62	3339.66	3491.15	3076.62
2270.49	3547.27	5362.09	3362.31	3401.51	3084.43
2272.49	3567.2	5185.27	3373.2	3338.99	3096.28
2274.48	3593.98	5011.47	3381.75	3327.3	3112.64
2276.48	3663.82	4856	3405.6	3325	3110.55
2278.48	3772.04	4707.95	3430.21	3342.33	3103.51
2280.48	3922.95	4548.03	3442.74	3355.23	3108.84
2282.48	4161.01	4386.94	3461.11	3362.47	3134
2284.48	4470.61	4220.8	3478.79	3344.56	3156.74
2286.48	4834.7	4061	3490.67	3312.23	3179.6
2288.47	5222.69	3935.93	3490.03	3273.14	3189.73
2290.47	5513.19	3860.44	3464.4	3239.44	3193.14
2292.47	5675.46	3805.84	3447.38	3236.25	3169.38
2294.47	5767.79	3777.67	3455.51	3243.36	3131.23
2296.47	5803.02	3757.72	3476.73	3255.39	3088.46
2298.47	5760.14	3755.74	3493.19	3280.79	3061.24
2300.47	5622.98	3794.2	3485.55	3304.56	3042.74
2302.47	5387.07	3852.17	3455.84	3342.71	3026.7
2304.46	5095.81	3904.6	3418.56	3384.6	3006.2
2306.46	4783.74	3942.98	3396.24	3417.68	3006.28
2308.46	4484.9	3952.86	3379.63	3451.77	2997.13
2310.46	4341.29	3942.33	3370.88	3476.32	2981.54
2312.46	4228.54	3935.44	3375.37	3483.53	2979.79
2314.46	4134.12	3916.61	3369.25	3466	2970.07
2316.46	4040.04	3872.18	3345.5	3460.88	2963.92
2318.45	3976.13	3800.22	3327.97	3478.01	2946.26
2320.45	3926.79	3736.35	3341.63	3496.97	2918.67
2322.45	3927.48	3694.97	3355.47	3528.7	2902.61
2324.45	3929.65	3671.56	3344.67	3552.67	2902.38
2326.45	3923.3	3686.7	3334.01	3595.62	2912.42
2328.45	3895.86	3732.96	3334.89	3678.7	2931.64
2330.45	3853.38	3780.9	3323.01	3767.85	2970.53
2332.45	3796.03	3815.13	3321.17	3844.52	3022.73
2334.44	3748.14	3825.94	3319.8	3900.03	3076.43
2336.44	3707.64	3822.6	3295.57	3935.97	3139.46
2338.44	3698.52	3799.35	3259.98	3924.7	3196.85
2340.44	3701.83	3785.24	3233.46	3867.43	3255.47
2342.44	3710.62	3804.82	3233.05	3789.93	3310.72
2344.44	3711.91	3845.63	3273.59	3700.95	3386.66
2346.44	3725.12	3882.91	3343.07	3618.55	3448.54
2348.43	3716.16	3914	3439.32	3565.09	3494.74
2350.43	3687.61	3920.2	3555.95	3515.89	3532.98
2352.43	3652.55	3920.25	3677.2	3491.89	3538.58
2354.43	3626.2	3906.05	3798.49	3482.62	3536.53
2356.43	3606.81	3864.03	3879.16	3480.77	3561.43
2358.43	3626.89	3810.16	3938.52	3468.77	3608.91
2360.43	3648.94	3777.48	3957.2	3462.19	3639.33
2362.43	3674.03	3765.02	3937.39	3469.28	3646
2364.42	3682.51	3799.95	3867.03	3478.77	3615.19
2366.42	3682.06	3839.52	3769.65	3485.91	3552.89
2368.42	3691.5	3900.2	3673.18	3483.81	3478.16
2370.42	3702.16	3966.37	3579.4	3485.19	3390.44
2372.42	3717.61	3999.52	3555.69	3479.36	3310.29
2374.42	3731.51	3991.9	3537.19	3453.57	3244.24
2376.42	3727.83	3966.62	3511.88	3442.5	3215.41
2378.41	3710.18	3927.17	3482.77	3423.97	3197.26
2380.41	3658.98	3911.18	3469.6	3383.26	3177.71
2382.41	3590.18	3935.4	3481.49	3352.26	3158.01
2384.41	3528.61	4008.49	3517.89	3343.48	3138.93
2386.41	3479.07	4089.38	3551.63	3356.13	3125.9
2388.41	3438.01	4197.48	3575.52	3385.83	3138.73
2390.41	3437.86	4311.26	3577.35	3432.09	3166.44
2392.41	3481.45	4397.79	3566.3	3479.23	3184.5
2394.4	3546.95	4470.01	3529.5	3487.06	3182.86
2396.4	3642.21	4525.73	3490.58	3485.61	3165.78
2398.4	3760.38	4544.52	3462.03	3458.58	3120.35
2400.4	3923.75	4513.24	3443.26	3436.34	3058.06
2402.4	4096.96	4438.97	3432.15	3399.82	2984.44
2404.4	4280.79	4328.05	3425.8	3375.25	2932.19
2406.4	4414.27	4210.92	3433.52	3356.89	2892.67
2408.39	4476.97	4097.19	3460.82	3320.89	2896.91
2410.39	4517.93	4060.04	3467.8	3291.34	2904.84
2412.39	4530.65	4097.37	3468.45	3267.61	2929.9
2414.39	4515.43	4190.28	3443.77	3275.11	2944.28
2416.39	4450.3	4306.62	3402.09	3289.81	2961.98
2418.39	4354.17	4439.14	3381.55	3312.05	2970.06
2420.39	4252.6	4507.54	3368.37	3325.77	2965.79
2422.39	4151.85	4569.13	3364.99	3330.35	2969.88
2424.38	4088.35	4619.15	3345.34	3326.2	2978.04
2426.38	4041.05	4665.04	3290.75	3305.04	2982.86
2428.38	3982.38	4696.57	3231.25	3255.46	3001.84
2430.38	3929.25	4740.61	3194.17	3210.99	3055.2
2432.38	3872.95	4843.53	3169.46	3193.99	3110.74
2434.38	3801.45	5003.55	3133.88	3192.63	3160.77
2436.38	3730.37	5237.14	3107.18	3204.32	3195.18
2438.37	3684.47	5503.82	3078.16	3235.41	3201.26
2440.37	3656.07	5718.8	3083.27	3268.14	3186.62
2442.37	3627.29	5915.51	3101.54	3290.28	3144.33
2444.37	3627.37	6097.01	3113.61	3311.59	3107.57
2446.37	3646.65	6219.25	3123.03	3304.19	3085.09
2448.37	3682.69	6294.68	3162.85	3290.84	3068.88
2450.37	3754.58	6314.73	3195.59	3288.46	3042.81
2452.37	3852.23	6285.67	3242.11	3270.88	3029.77
2454.36	3934.11	6170.4	3268.01	3257.64	3002.61
2456.36	3982.59	5983.93	3283.01	3236.92	2983.94
2458.36	3994.1	5765.42	3314.9	3215.33	2990.82
2460.36	3980.1	5504.46	3354.94	3212.53	3011.83
2462.36	3964.66	5227.39	3390.79	3229.97	3012.36
2464.36	3940.53	4947.23	3411.21	3254.71	3021.33
2466.36	3925.25	4706.35	3434.22	3262.28	3043.33
2468.35	3908.95	4495.51	3451.27	3280.49	3064.19
2470.35	3899.71	4311.09	3459.54	3309.44	3065.81
2472.35	3895.25	4157.68	3470.83	3336.66	3054.3
2474.35	3880.58	4029.98	3493.48	3366.54	3015.82
2476.35	3860.36	3897.93	3501.88	3401.73	2983.49
2478.35	3803.87	3797.21	3506.69	3421.89	2977.11
2480.35	3730.37	3730.94	3480.61	3423.34	2990.81
2482.35	3671.13	3699.57	3456.01	3412.61	3012.02
2484.34	3629.88	3714.3	3464.64	3379.82	3026.79
2486.34	3598.84	3746.53	3495.55	3329.11	3040.16
2488.34	3578.17	3782.93	3530.12	3274.4	3033.02
2490.34	3556.84	3817.56	3580.62	3244.58	3008.71
2492.34	3546.92	3847.84	3606.61	3246.98	2978.02
2494.34	3524.19	3855.92	3611.85	3263.27	2923.77
2496.34	3491.32	3845.57	3589.87	3287.16	2880.47
2498.33	3463.46	3823.23	3535.45	3302.07	2868.84
2500.33	3430.3	3794.42	3473.51	3332.51	2877.67
2502.33	3396.29	3765.46	3406.51	3379.9	2899.73
2504.33	3354.94	3768.09	3351.21	3419.06	2933.93
2506.33	3329.3	3796.99	3309.17	3449.63	2982.01
2508.33	3330.2	3850.59	3289.09	3481.36	3042.31
2510.33	3343.29	3906.67	3276.17	3493.14	3100.56
2512.33	3360.3	3941.41	3275.21	3491.3	3155.28
2514.32	3386.46	3944.12	3267.25	3460.68	3236.81
2516.32	3434.34	3921.37	3264.22	3400.95	3336.07
2518.32	3495.51	3878.1	3289.29	3348.25	3436.18
2520.32	3561.81	3847.98	3317.71	3293.85	3532.04
2522.32	3633.6	3818.14	3347.88	3251.57	3618.39
2524.32	3713.59	3815.38	3366.99	3216.64	3691.93
2526.32	3793.68	3837.38	3396.72	3204.78	3742.41
2528.31	3861.78	3863.76	3410.32	3201.13	3788.69
2530.31	3930.82	3897.31	3413.47	3227.37	3826.21
2532.31	3955.66	3933.99	3429.71	3284.3	3823.71
2534.31	3952.68	3949.77	3436.22	3372.33	3798.8
2536.31	3929.38	3961.87	3453.43	3489.37	3761.56
2538.31	3908.48	3960.74	3472.7	3603.94	3710.2
2540.31	3927.84	3956.67	3490.61	3701.61	3658.48
2542.31	4010.86	3974.94	3527.35	3783.2	3614.49
2544.3	4144.18	4046.24	3575.21	3848.32	3562.39
2546.3	4309.25	4174.47	3617.8	3883.41	3508.64
2548.3	4489.35	4324.22	3653.13	3880.94	3460.82
2550.3	4663.81	4481.18	3660.83	3852.19	3426.45
2552.3	4726.82	4601.25	3654.66	3783.67	3379.77
2554.3	4756.6	4680.06	3663.38	3686.76	3306.23
2556.3	4747.13	4734.51	3669.63	3595.89	3218.88
2558.29	4700.36	4762.31	3672.62	3523.33	3143.89
2560.29	4579.26	4747.77	3715.55	3472.88	3074.87
2562.29	4398.48	4686.67	3807.19	3479.93	3016.9
2564.29	4193.25	4606.5	3916.32	3517.17	2991.38
2566.29	3974.34	4539.81	3987.82	3564.15	2986.83
2568.29	3786.25	4494.45	4045.98	3612	2999.61
2570.29	3711.22	4464.99	4072.56	3686.98	3036.27
2572.29	3686.3	4406.96	4068.68	3770.44	3072.6
2574.28	3678.81	4319.16	4026.64	3858.4	3101.76
2576.28	3685.23	4235.57	3962.5	3945.39	3123.1
2578.28	3717.79	4180.89	3900.82	4010.91	3145.28
2580.28	3769.35	4155.69	3838.28	4052.74	3166.74
2582.28	3822.3	4121.35	3798.5	4080.66	3185.19
2584.28	3894.19	4063.01	3739.26	4072.87	3190.48
2586.28	3961.49	3979.85	3680.17	4030.57	3181.35
2588.27	4023.99	3902.07	3598.21	3997.56	3178.08
2590.27	4055.29	3827.56	3520.11	3978.29	3188.85
2592.27	4072.47	3773.79	3431.59	3952.05	3223.33
2594.27	4067.56	3730.07	3334.29	3907.54	3278.35
2596.27	4032.89	3695.55	3256.65	3868.75	3333.79
2598.27	3954.98	3671.03	3192.86	3833.41	3381.63
2600.27	3860.84	3643.78	3144.28	3801.09	3425.65
2602.27	3787.73	3644.06	3123.46	3782.2	3465.7
2604.26	3735.61	3639.9	3120.81	3794.48	3491.7
2606.26	3744.91	3628.36	3153.02	3791.14	3507.03
2608.26	3738.05	3641.37	3211.91	3753.9	3541.7
2610.26	3715.88	3683.02	3285.19	3703.03	3589.62
2612.26	3665.3	3752.37	3353	3654.52	3666.35
2614.26	3601.65	3829.93	3424.28	3601.36	3723.61
2616.26	3551.65	3905.11	3483.84	3526.64	3752.7
2618.25	3512.19	3970.86	3546.05	3461.38	3763.06
2620.25	3500.32	4024.09	3592.88	3416.65	3730.56
2622.25	3515.42	4063.83	3642.69	3387.78	3649.16
2624.25	3557.87	4115.39	3667.45	3367.6	3544.54
2626.25	3622.3	4159.75	3682.48	3331.85	3416.13
2628.25	3689.88	4188.3	3733.1	3301.89	3285.23
2630.25	3765.62	4183.76	3791.11	3284.38	3160.18
2632.25	3852.26	4159.17	3857.97	3265.97	3038.36
2634.24	3972.4	4150.14	3924.29	3253.67	2940.52
2636.24	4139.97	4124.37	3962.59	3260.39	2870.79
2638.24	4335.37	4102.52	3999.42	3262.06	2821.89
2640.24	4518.85	4111.09	4024.49	3265.97	2801.04
2642.24	4677.3	4125.05	4016.71	3292.03	2798.04
2644.24	4823.65	4146.16	3967.61	3319.94	2804.97
2646.24	4923.17	4162.68	3882.71	3353.79	2812.7
2648.23	4978.82	4169.26	3797.36	3374.29	2812
2650.23	4989.23	4205.49	3698.93	3389.06	2793.34
2652.23	4951.46	4271.62	3611.77	3378.26	2771.31
2654.23	4842.69	4358.57	3536.4	3348.9	2754.4
2656.23	4683.34	4407.01	3489.98	3343.39	2740.07
2658.23	4501.52	4433.33	3429.61	3354.19	2730.56
2660.23	4310.72	4437.02	3377.15	3370.59	2731.91
2662.23	4134.69	4424.3	3348.21	3391.57	2741.25
2664.22	3996.64	4419.47	3332.53	3403.85	2752.58
2666.22	3904.99	4404.02	3326.3	3387.44	2758.6
2668.22	3827.54	4396.6	3317.23	3354.19	2774.38
2670.22	3769.17	4362.09	3333.53	3298.13	2789.04
2672.22	3711.13	4296.67	3369.96	3240.36	2803
2674.22	3665.44	4206.57	3446.51	3199.01	2813.4
2676.22	3636.7	4122.66	3553.3	3161.4	2832.13
2678.21	3616.68	4044.26	3683.86	3134.79	2857.51
2680.21	3599.25	3991.41	3831.91	3149.18	2894.54
2682.21	3566.81	3926.26	3994.34	3182.89	2939.13
2684.21	3548.77	3857	4119.54	3227.83	2997.59
2686.21	3548.62	3808.85	4188.91	3298.61	3052.19
2688.21	3564.62	3777.91	4206.94	3381.5	3080.58
2690.21	3588.37	3757.93	4174.64	3459.74	3090.24
2692.21	3611.19	3737.89	4091.48	3537.46	3097.82
2694.2	3634.62	3731.97	3959.75	3592.11	3086
2696.2	3642.47	3719.81	3825.13	3626.39	3036.95
2698.2	3624.9	3714.58	3701.16	3644.43	2985.1
2700.2	3587.13	3694.14	3655.1	3618.88	2955.12
2702.2	3540.58	3677.64	3612.88	3573.5	2932.08
2704.2	3500.31	3680.78	3546.98	3511.6	2906.93
2706.2	3462.24	3672.75	3491.65	3452.72	2880.82
2708.19	3466.3	3678.97	3453.29	3410.63	2866.62
2710.19	3480.44	3690.83	3414.36	3379.48	2856.78
2712.19	3485.9	3689.53	3397.36	3362.77	2870.39
2714.19	3487.59	3705.96	3417.12	3370.09	2914.09
2716.19	3499.67	3719.89	3460.36	3374.79	2963.73
2718.19	3510.38	3727.39	3547.15	3384.25	3004.28
2720.19	3509.16	3760.17	3679.12	3407.99	3037.56
2722.19	3502.99	3791.6	3832.07	3436.99	3063.26
2724.18	3504.27	3818.92	4023.28	3471.86	3088.9
2726.18	3498.59	3850	4225.51	3506.12	3094.18
2728.18	3492.41	3902.05	4410.6	3525.75	3067.59
2730.18	3496.03	3969.2	4587.96	3538.18	3043.19
2732.18	3497.74	4033.2	4701.73	3517.15	3024.19
2734.18	3498.47	4105.57	4741.37	3489.48	3006.95
2736.18	3500.69	4220.94	4736.22	3493.54	3018.8
2738.17	3486.33	4369.57	4672.18	3511.24	3022.65
2740.17	3452.96	4582.73	4582.09	3518.98	3016.46
2742.17	3415.49	4863.23	4471.37	3514.18	3001.09
2744.17	3375.96	5219.29	4324.55	3483.21	2997.29
2746.17	3343.14	5587.59	4159.64	3461.89	2987.94
2748.17	3340.46	5868.05	4031.75	3472.69	2957.39
2750.17	3343.34	6066.64	3944.47	3504	2936.59
2752.17	3345.52	6234.67	3911.11	3533.38	2934.3
2754.16	3359.12	6327.3	3896.55	3547.1	2923.68
2756.16	3360.58	6288.03	3879.17	3535.98	2914.47
2758.16	3358.74	6147.85	3880.8	3495.66	2919.27
2760.16	3344.47	5932.62	3872.75	3427.6	2933.71
2762.16	3339.28	5662.12	3861.1	3372.58	2956.56
2764.16	3346.89	5348.95	3831.21	3353.56	2974.56
2766.16	3368.2	5048.92	3803.4	3360.93	3007.71
2768.15	3375.87	4868.42	3810.36	3374.92	3043.36
2770.15	3392.53	4698.81	3847.07	3384.78	3074.7
2772.15	3426.62	4547.81	3926.5	3414.66	3084.91
2774.15	3457.08	4409.38	3997.81	3465.73	3093.6
2776.15	3487.42	4286.49	4061.61	3519.46	3079.16
2778.15	3518	4175.87	4112.21	3562.37	3050.45
2780.15	3560.19	4121.32	4141.72	3585.51	3024.48
2782.15	3585.87	4114.23	4134.25	3590.35	3005.31
2784.14	3610.05	4101.67	4109.35	3562.77	2988.3
2786.14	3642.71	4093.13	4093.64	3510.19	2975.59
2788.14	3676.83	4073.81	4058.72	3461.15	2967.27
2790.14	3699.39	4041.75	3993.69	3421.29	2968.28
2792.14	3697.45	4017.9	3915.2	3390.66	2973.63
2794.14	3670.58	3994.64	3844.97	3362.2	2979.35
2796.14	3633.91	3972.3	3777.94	3343.2	2982.52
2798.13	3596.41	3932.13	3728.57	3312.9	2990.66
2800.13	3572.81	3880.49	3673.91	3285.18	3007.18
2802.13	3567.63	3850.14	3602.39	3254.64	3007.32
2804.13	3554.45	3849.08	3503.13	3227.83	2988.44
2806.13	3555.63	3840.84	3409.68	3213.76	2959.11
2808.13	3576.66	3827.38	3345.42	3200.88	2921.83
2810.13	3601.49	3805.15	3319.68	3208.76	2882.27
2812.13	3655.73	3795.89	3332.52	3221.82	2857.83
2814.12	3760.93	3791.13	3353.01	3236.93	2829.79
2816.12	3890.83	3805.18	3361.92	3239.55	2810.44
2818.12	4011.51	3802.34	3356.67	3247.4	2806.17
2820.12	4102.91	3805.82	3333.41	3265.47	2815.24
2822.12	4155.61	3821.81	3286.79	3279.26	2813.37
2824.12	4144.36	3827.79	3241.89	3322.27	2811.17
2826.12	4095.76	3852.3	3214.13	3363.68	2821.35
2828.11	4007.59	3892.45	3206.29	3405.06	2826.69
2830.11	3911.51	3927.14	3203.35	3440.56	2837.17
2832.11	3818.14	3946.63	3185.83	3468.51	2860.23
2834.11	3739.88	3970.17	3177.33	3527.81	2891.82
2836.11	3689.68	4010.96	3174.25	3617.06	2923.35
2838.11	3655.91	4043.41	3169.79	3709.34	2940.66
2840.11	3604.93	4057.64	3189.27	3801.88	2962.6
2842.11	3544	4083.93	3217.39	3855.96	2979.27
2844.1	3497.04	4116.74	3277.9	3876.38	2991.96
2846.1	3464.88	4181.95	3344.17	3861.83	2992.94
2848.1	3454.49	4248.24	3413.57	3799.18	2989.81
2850.1	3457.33	4303.41	3486.95	3703.27	2997.63
2852.1	3481.98	4344.82	3547.57	3624.24	2997.52
2854.1	3524.21	4361.39	3619.14	3574.73	2977.53
2856.1	3567.98	4353.4	3682.47	3575.68	2972.98
2858.09	3606.48	4310.14	3738.61	3600.96	2981.97
2860.09	3658.31	4224.7	3779.46	3636	2965.2
2862.09	3697.53	4123.02	3809.15	3709.3	2944.05
2864.09	3714.98	4022.77	3859.64	3831.29	2898.96
2866.09	3708.4	3931.9	3919.06	4005.88	2852.22
2868.09	3675.32	3890.16	3963.53	4221.89	2815.73
2870.09	3639.47	3882.21	3977.77	4462.1	2779.6
2872.09	3595.7	3873.79	3955.22	4691.15	2741.59
2874.08	3557.81	3882.3	3886.96	4899.15	2724.81
2876.08	3527.94	3910	3759.64	5065.78	2717.62
2878.08	3514.44	3943.59	3604.84	5199.23	2722.78
2880.08	3495.6	3967.51	3464.46	5287.84	2733.34
2882.08	3484.91	3964.36	3352.27	5316.36	2744.49
2884.08	3478.18	3937.5	3299.6	5275.34	2764
2886.08	3479.81	3892.19	3242.63	5170.28	2776.49
2888.07	3468.38	3856.8	3218.54	5023.55	2783.26
2890.07	3452.66	3814.94	3236.66	4849.75	2798.31
2892.07	3474.48	3798.64	3268.04	4633.66	2801.81
2894.07	3540.94	3790.03	3295.93	4428.81	2796.33
2896.07	3616.03	3796.87	3318.78	4244.71	2792.39
2898.07	3698.83	3834.56	3335.61	4080.27	2785.1
2900.07	3812.42	3879.37	3329.44	3943.38	2784.93
2902.07	3921.78	3920.92	3317.54	3846.16	2789.94
2904.06	3988.47	3964.18	3330.03	3761.58	2793.27
2906.06	4027.66	4023.65	3342.4	3692.76	2801.44
2908.06	4032.07	4086.68	3332.02	3644.95	2813.52
2910.06	3996.46	4151.57	3320.54	3632.48	2815.59
2912.06	3914.84	4227.93	3347.12	3637.08	2800.38
2914.06	3817.21	4294.75	3389.79	3661.63	2767.01
2916.06	3745.09	4366.74	3422.69	3684.11	2717.26
2918.05	3719.99	4430.32	3454.16	3698.99	2667.95
2920.05	3735.53	4470.77	3490.97	3694.34	2635.35
2922.05	3778.64	4467.8	3532.94	3665.51	2614.19
2924.05	3844.32	4435.95	3557.46	3606.51	2605.14
2926.05	3887.66	4358.91	3574.47	3542.31	2617.35
2928.05	3917.8	4254.72	3562.96	3488.32	2643.99
2930.05	3940.97	4161.31	3547.48	3438.73	2672.37
2932.05	3956.06	4087.58	3571.26	3390.58	2692.65
2934.04	3942.76	4036.9	3638.96	3360.43	2720.02
2936.04	3910.94	3997.8	3735.31	3341.09	2755.01
2938.04	3884.94	3966.47	3870.85	3344.19	2793
2940.04	3863.67	3939.88	4009.64	3365.06	2835.19
2942.04	3844.19	3903.45	4147.12	3390.68	2874.25
2944.04	3802.89	3841.12	4291.04	3399.22	2900.74
2946.04	3759.01	3779.86	4421.86	3418.34	2913.84
2948.03	3703.12	3760.15	4534.08	3451.84	2908.8
2950.03	3644.53	3776.14	4595.56	3488.38	2867.06
2952.03	3621.49	3802.35	4607.76	3512.97	2816.94
2954.03	3629.83	3824.36	4563.3	3527.6	2792.89
2956.03	3679.57	3873.27	4453.09	3509.08	2792.24
2958.03	3741.93	3942.42	4267.39	3481.82	2804.8
2960.03	3795.76	4021.48	4044.7	3446.58	2813.18
2962.03	3804.15	4126.59	3820.52	3399.08	2804.54
2964.02	3802.56	4209.53	3633.2	3380.81	2786.11
2966.02	3793.1	4295.17	3503.49	3376.53	2770.64
2968.02	3753.18	4390.45	3390.11	3374.25	2743.2
2970.02	3676.88	4486.99	3314.27	3377.42	2724.73
2972.02	3604.27	4578.33	3251.96	3394.23	2717.37
2974.02	3543.64	4695.89	3202.27	3401.13	2711.5
2976.02	3510.99	4836.82	3151.43	3392.62	2720.07
2978.01	3507.31	4961.84	3121.43	3390.68	2730.74
2980.01	3496.6	5035.52	3098.02	3387.81	2743.92
2982.01	3467.11	5060.48	3080.25	3391.79	2758.03
2984.01	3424.04	5051.55	3100.26	3382.17	2760.99
2986.01	3370.55	4999.82	3135.06	3349.12	2755.25
2988.01	3318.24	4931.76	3160.3	3316.52	2762.92
2990.01	3274.7	4838.96	3196.68	3308.64	2790.67
2992.01	3257.97	4701.95	3222.52	3312.34	2805.79
2994	3245.87	4562.35	3244.94	3311.38	2834.69
2996	3254.41	4435.56	3298.64	3335.71	2881.11
2998	3273.37	4339.2	3378.68	3368.42	2923.18
3000	3308.61	4282.18	3432.49	3399.76	2947.95
3002	3348.9	4266.13	3467.99	3438.3	2967.66
3004	3393.17	4275.15	3481.79	3460.15	2962.06
3006	3426.55	4300.27	3462.35	3476.57	2933.15
3007.99	3441.77	4344.4	3408.56	3467.49	2897.15
3009.99	3442.57	4396.92	3355.98	3453.04	2872.28
3011.99	3439.37	4490.72	3332.34	3466.76	2866.84
3013.99	3461.96	4661.11	3316.07	3486.51	2863.39
3015.99	3486.35	4877.36	3282.9	3529.57	2847.63
3017.99	3508.96	5087.11	3270.27	3597.4	2837.67
3019.99	3540.91	5218.4	3267.38	3688.88	2825.18
3021.99	3572.85	5292.37	3276.45	3770.47	2799.54
3023.98	3582.85	5318.39	3283.27	3830.87	2763.06
3025.98	3568.28	5283.71	3284.2	3866.65	2728.96
3027.98	3531.45	5186.35	3294.58	3877.16	2696.05
3029.98	3485.21	5018.31	3290.06	3847.41	2670.26
3031.98	3457.29	4819.04	3255.1	3783.76	2655.41
3033.98	3461.51	4615.8	3224.36	3709.12	2646.85
3035.98	3483.39	4447.64	3216.98	3624.92	2636.86
3037.97	3493.91	4381.18	3199.63	3545.27	2632.25
3039.97	3495.21	4314.68	3186.96	3475.87	2641.29
3041.97	3513.38	4262.29	3208.75	3439.97	2662.07
3043.97	3525.4	4197.76	3255.66	3424.55	2702.53
3045.97	3531.35	4121.28	3288.61	3414.47	2755.88
3047.97	3517.34	4074.3	3304.15	3399.17	2805.5
3049.97	3508.33	4055.67	3300.55	3382.37	2842.66
3051.97	3502.63	4065.27	3303.36	3360.81	2862.04
3053.96	3513.11	4097.28	3313.22	3344.49	2873.3
3055.96	3520.74	4150.88	3319.4	3330.65	2869.44
3057.96	3526	4236.42	3358.67	3322.96	2863.7
3059.96	3541.71	4355.24	3398.07	3321.01	2851.42
3061.96	3541.31	4502.37	3439.45	3320.45	2833.07
3063.96	3532.45	4683.8	3458.22	3343.14	2814.52
3065.96	3532.19	4933.73	3463.5	3352.44	2804.12
3067.95	3529.38	5214.6	3472.26	3361.08	2790.23
3069.95	3524.65	5410.85	3475.68	3377.8	2773.89
3071.95	3507.34	5523.16	3490.39	3369.04	2766.42
3073.95	3470.14	5598.64	3495.32	3342.96	2754.18
3075.95	3436.47	5633.52	3472.23	3321.91	2734.23
3077.95	3414.37	5623.18	3411.65	3303.18	2707.27
3079.95	3413.3	5539.02	3301.7	3278.2	2690.31
3081.95	3415.15	5407.07	3178.47	3232.13	2681.4
3083.94	3443.21	5249.67	3080.74	3200.34	2680.93
3085.94	3485.75	5060.75	3015.48	3181.79	2687.6
3087.94	3569.66	4859.76	2974.44	3191.29	2697.87
3089.94	3676.63	4656.28	2958.9	3211.67	2727.65
3091.94	3769.64	4458.32	2961.68	3223.93	2782.21
3093.94	3887.47	4269.21	2956.69	3219.23	2870.99
3095.94	4043.34	4087.5	2966.72	3198.43	2978.29
3097.93	4245.3	3965.1	2992.87	3194.74	3104.89
3099.93	4492.2	3893.97	3024.59	3196.46	3207.16
3101.93	4820.16	3826.22	3082.29	3215.04	3289.24
3103.93	5223.97	3749.87	3145.47	3235.92	3344.79
3105.93	5702.67	3681.37	3202.19	3251.67	3373.23
3107.93	6267.99	3613.35	3272.41	3274.36	3361.92
3109.93	6882.13	3553.99	3367.37	3294.93	3324.41
3111.93	7473.8	3522.25	3484.01	3301.44	3275.11
3113.92	8036.25	3515.05	3602.56	3308.8	3236.44
3115.92	8503.46	3514.68	3714.19	3310.05	3207.67
3117.92	8927.73	3518.81	3788.71	3311.94	3214.1
3119.92	9345.47	3536.49	3795.66	3320.58	3255.3
3121.92	9785.36	3556.77	3766.57	3318.81	3288.76
3123.92	10217.6	3589.9	3691.7	3328.06	3346.4
3125.92	10619.6	3615.35	3605.04	3327.13	3438.62
3127.91	10988.4	3642.47	3534.49	3303.87	3530.92
3129.91	11316.5	3697.7	3489.45	3294.49	3618.25
3131.91	11486.4	3757.01	3438.42	3313.31	3685.21
3133.91	11629.8	3817.52	3387.93	3325.74	3714.31
3135.91	11705.5	3861.99	3374.36	3330.89	3704.98
3137.91	11691.3	3899.32	3356.51	3362.49	3655.61
3139.91	11572.4	3950.27	3339.15	3388.72	3545.87
3141.91	11366.2	3993.71	3352.71	3414.77	3401.56
3143.9	11099.3	4041.3	3381.41	3456.97	3256.88
3145.9	10742.2	4100.15	3413.43	3505.66	3109.99
3147.9	10297.1	4140.65	3434.93	3574.25	3012.97
3149.9	9823.3	4182.31	3444.54	3627.42	2962.18
3151.9	9271.35	4201.52	3453.64	3658.55	2939.69
3153.9	8669.48	4200.78	3460.8	3668.14	2929.24
3155.9	7962.07	4219.73	3490.57	3648.82	2930.12
3157.89	7337.4	4254.92	3533.39	3631.71	2922.95
3159.89	6681.1	4271.27	3566.03	3599.18	2919.59
3161.89	6082.46	4263.51	3582.46	3549.09	2909.29
3163.89	5563.46	4221.78	3572.79	3515.66	2893.95
3165.89	5187.94	4162.25	3567.33	3506.88	2886.16
3167.89	4964.71	4112.64	3552.86	3504.27	2871.16
3169.89	4798.34	4065.27	3530.75	3490.27	2853.36
3171.89	4640.58	4014.25	3503.31	3453.22	2829.94
3173.88	4497.88	3984.58	3492.15	3407.96	2798.78
3175.88	4377.2	3964.8	3480.38	3393.71	2759.9
3177.88	4242.46	3960.8	3474.98	3404.68	2714.99
3179.88	4112.29	3971.6	3471.67	3431.18	2674.27
3181.88	4024.45	3996.57	3463.55	3477.42	2642.56
3183.88	3978.16	4022.15	3484.22	3534.85	2630.66
3185.88	3969.52	4045.57	3509.03	3598.96	2634.6
3187.87	4009.21	4057.94	3511.19	3674.55	2652.27
3189.87	4120.25	4050.93	3496.2	3740.59	2674.28
3191.87	4287.03	4025.75	3452.89	3795.29	2696.03
3193.87	4507.59	4025.59	3373.87	3849.42	2713.56
3195.87	4794.71	4065.52	3297.36	3880.56	2726.93
3197.87	5162.89	4121.37	3244.72	3884.18	2740.77
3199.87	5513.58	4153.39	3224.61	3854.83	2756.32
3201.87	5845.1	4161.5	3217.32	3793.54	2775.55
3203.86	6171.36	4150.27	3222.71	3722.26	2807.5
3205.86	6452.18	4102.49	3227.22	3650.53	2860
3207.86	6674.63	4030.91	3237.46	3603.04	2922.75
3209.86	6873.15	3968.04	3282.06	3579.42	2979.29
3211.86	7024.9	3899.65	3338.57	3576.73	3022.85
3213.86	7109.04	3829.23	3400	3590.22	3042.56
3215.86	7139.03	3757.66	3457.95	3589.73	3036.23
3217.85	7105.89	3698.64	3507.41	3566.98	3002.47
3219.85	7019.89	3672.74	3551.87	3535.19	2946.98
3221.85	6868.73	3660.03	3619.37	3492.28	2882.07
3223.85	6668.59	3641.04	3674.21	3460.13	2842.93
3225.85	6414.23	3623.21	3721.13	3429.53	2830.94
3227.85	6081.55	3599.52	3764.97	3390.89	2839.14
3229.85	5706.17	3578.52	3833.79	3378.77	2865.98
3231.85	5307.36	3578.92	3939.95	3379.32	2923.76
3233.84	4895.74	3576.52	4074.21	3369.58	2994.67
3235.84	4554.21	3569.07	4239.38	3365.08	3067.15
3237.84	4300.06	3576.97	4402.4	3364.8	3140.57
3239.84	4109.02	3596.64	4556.89	3379.42	3201.43
3241.84	3969.97	3589.29	4707.62	3399.01	3244.51
3243.84	3876.14	3580.38	4813.6	3432.84	3276.7
3245.84	3812.79	3577.24	4878.47	3469.44	3270.99
3247.83	3763.55	3571.51	4883.81	3493.46	3242.38
3249.83	3744.04	3551.91	4840.19	3504.89	3202.32
3251.83	3739.14	3534.6	4742.76	3536.12	3149.14
3253.83	3738.7	3535.32	4594.05	3568.59	3074.72
3255.83	3751.81	3562.35	4416.24	3603.63	3006.34
3257.83	3798.79	3607.68	4243.98	3673.53	2946.55
3259.83	3864.68	3667.44	4096.49	3747.72	2893.77
3261.83	3942.86	3716.69	3952.89	3823.91	2845.37
3263.82	4028.91	3755.23	3811.97	3884.9	2809.34
3265.82	4112.24	3782.67	3703.63	3917.86	2779.16
3267.82	4179.07	3790.82	3634.57	3925.92	2752.53
3269.82	4188.11	3809.12	3593.87	3906.02	2739.15
3271.82	4147.51	3815.01	3579.09	3844.49	2758.21
3273.82	4064.97	3795.8	3558.15	3752.62	2811.09
3275.82	3972.87	3757.44	3524.3	3670.18	2880.08
3277.81	3895.43	3734.61	3477.46	3589.12	2958.32
3279.81	3861.51	3720.19	3424.79	3550.85	3050.99
3281.81	3857.23	3724.77	3393.83	3551.41	3123.39
3283.81	3833.32	3738.76	3388.18	3594.78	3167.23
3285.81	3806.26	3745.34	3387.57	3637.97	3181.53
3287.81	3802.2	3777.81	3380.59	3659.46	3164.97
3289.81	3811.82	3863.91	3363.97	3658.49	3104.98
3291.81	3813.12	3986.64	3325.83	3634.95	3014.22
3293.8	3792.01	4155.54	3303.29	3577.86	2930.7
3295.8	3754.53	4369.15	3291.29	3513.5	2854.33
3297.8	3708.69	4617.94	3285.5	3466.48	2811.29
3299.8	3669.37	4848.17	3288.08	3433.33	2802.81
3301.8	3639.65	5065.65	3290.19	3421.2	2828.9
3303.8	3655.34	5269.39	3300.96	3413.42	2854.47
3305.8	3672.39	5441.61	3317.88	3393.32	2877.08
3307.79	3675.77	5568.88	3315.61	3375.42	2897
3309.79	3698.33	5651.72	3303.78	3359.5	2912.64
3311.79	3745.24	5650.55	3262.76	3325.19	2923.05
3313.79	3794.73	5591.21	3198.81	3290.41	2944.43
3315.79	3821.22	5471.58	3138.15	3274.18	2970.77
3317.79	3849.42	5322.18	3096.91	3254.53	2993.26
3319.79	3886.68	5147.33	3088.4	3244.85	3009.1
3321.79	3914.42	4918.6	3090.03	3244.76	3008.9
3323.78	3940.91	4660.84	3090.89	3263.93	2990.07
3325.78	3979.37	4396.6	3109.86	3274.68	2946.25
3327.78	4033.76	4143.56	3152.93	3274.89	2903.31
3329.78	4045.86	3957.75	3218.47	3268.14	2848.98
3331.78	4013.16	3805.33	3289.69	3264.51	2812.23
3333.78	3944.87	3692.08	3362.78	3283.65	2801.14
3335.78	3865.79	3610	3439.7	3309.41	2797.79
3337.77	3777.75	3557.78	3509.07	3348.65	2798.44
3339.77	3726.34	3519.64	3567.19	3382.42	2800.9
3341.77	3744.06	3518.2	3627.21	3428.46	2797.82
3343.77	3748.44	3526.49	3689.87	3491.47	2788.08
3345.77	3757.12	3551.81	3731.28	3532.22	2777.95
3347.77	3777.48	3574.08	3755.35	3548.75	2771.61
3349.77	3793.48	3602.15	3761.36	3543.07	2762.34
3351.77	3798.39	3623.59	3774.08	3507.15	2743.39
3353.76	3831.88	3634.22	3768.17	3471.22	2720.74
3355.76	3884.74	3634.95	3720.66	3448.48	2702.25
3357.76	3936.66	3653.5	3652.72	3442.43	2687.21
3359.76	3970.44	3698.93	3573.34	3472.57	2673.67
3361.76	3974.83	3751.05	3480.22	3502.35	2672.11
3363.76	3950.35	3813.76	3379.78	3514.59	2691.32
3365.76	3899.04	3868.13	3293.43	3510.41	2716.74
3367.75	3848.71	3918.83	3235.74	3484.54	2737.08
3369.75	3789.38	3944.04	3211.94	3427.59	2765.7
3371.75	3770.11	3947.06	3187.72	3363.37	2804.14
3373.75	3746.49	3930.88	3156.8	3327.05	2846.24
3375.75	3712.01	3883.84	3151.48	3313.9	2883.3
3377.75	3691.63	3809.28	3157.78	3307.95	2912.66
3379.75	3675.1	3746.93	3186.69	3301.21	2930.57
3381.75	3685.35	3690.51	3213.04	3303.79	2934.05
3383.74	3692.73	3663.6	3231.05	3303.4	2925.03
3385.74	3709.92	3622.09	3221.37	3285.99	2900.88
3387.74	3745.52	3575.19	3181.36	3264.02	2871.81
3389.74	3785.1	3544.88	3126.1	3271.71	2853.72
3391.74	3843.23	3543.79	3086.63	3290.59	2836.97
3393.74	3909.89	3597.4	3051.4	3296.82	2821.41
3395.74	3985.96	3687.39	3041.56	3313.69	2811.89
3397.73	4099.28	3790.12	3044.41	3323.93	2806.57
3399.73	4245.31	3900.01	3062.21	3308.03	2793.37
3401.73	4417.53	3998.57	3071.57	3281.19	2789.02
3403.73	4602.26	4049.75	3071.71	3269.94	2786.28
3405.73	4807.23	4033.26	3089.16	3292.32	2788.4
3407.73	5045.8	3985.29	3097.25	3329.44	2782.72
3409.73	5323.59	3898.1	3114.51	3370.06	2766.57
3411.73	5618.89	3811.68	3135.94	3399.07	2743.31
3413.72	5915	3752.84	3133.82	3409.37	2729.31
3415.72	6199.94	3741.47	3125.2	3393.87	2721.63
3417.72	6473.51	3776.26	3154.4	3381.28	2716.53
3419.72	6733.18	3817.73	3200.16	3386.55	2714.44
3421.72	6967.15	3848.78	3246.97	3361.26	2707.11
3423.72	7180.54	3882.15	3284.06	3309.21	2695.26
3425.72	7354.62	3905.99	3306.55	3269.21	2695.1
3427.71	7496.8	3913.03	3316.74	3237.13	2692.78
3429.71	7610.12	3890.63	3346.48	3218.17	2690.81
3431.71	7687.96	3865.96	3380.74	3205.68	2687.68
3433.71	7722.73	3857.95	3413.77	3216.6	2690.02
3435.71	7713.37	3851.85	3454.76	3225.62	2706.17
3437.71	7649.54	3860.63	3482.82	3220.31	2722.18
3439.71	7534.47	3904.33	3522.92	3217.89	2735.19
3441.71	7359.97	3973.44	3596.08	3235.55	2745.18
3443.7	7127.8	4046.33	3678.94	3257.67	2750.36
3445.7	6836.11	4113.12	3747.1	3271.9	2748.19
3447.7	6537.08	4166.17	3774.49	3266.6	2736.6
3449.7	6239.03	4188.68	3778.57	3263.72	2734.16
3451.7	5921.12	4190.3	3750.61	3281.2	2738.39
3453.7	5595.13	4155.91	3681.25	3300.01	2746.8
3455.7	5282.03	4104.71	3568.87	3327.58	2748.32
3457.69	5008.19	4058.55	3452.12	3351.45	2750.47
3459.69	4766.52	4011.99	3346.73	3368.88	2755.92
3461.69	4570.42	3990.4	3236.99	3390.83	2757.84
3463.69	4433.02	3964.91	3164.2	3413.23	2762.99
3465.69	4319.98	3914.39	3123.03	3431.58	2774.35
3467.69	4223.42	3869.15	3100.49	3480.32	2775.47
3469.69	4155.62	3844.51	3098.62	3545.83	2778.87
3471.69	4095.32	3837.48	3105	3620.13	2780.77
3473.68	4043.02	3831.73	3107.91	3704.82	2775.75
3475.68	4011.54	3811.77	3113.85	3775.34	2768.1
3477.68	3972.22	3787.64	3139.33	3814.9	2761.08
3479.68	3924.01	3728.02	3145.84	3813.28	2757.04
3481.68	3885.02	3656.06	3136.6	3775.51	2743.7
3483.68	3881.74	3609.44	3116.59	3697.28	2736.87
3485.68	3904.96	3582.53	3080.98	3613.94	2737.09
3487.67	3921.08	3585.14	3066.43	3537.53	2731.34
3489.67	3936.3	3598.35	3058.3	3456.67	2730.21
3491.67	3951.44	3623.07	3035.49	3380.65	2740.67
3493.67	3964.14	3641.77	3020.48	3323.09	2761.89
3495.67	3972.86	3652.33	3014.88	3292.44	2795.59
3497.67	3955.39	3670.07	3007.93	3271.39	2846.21
3499.67	3927.33	3695.97	3022.21	3262.37	2887.22
3501.67	3908.92	3717.56	3022.16	3260.05	2910.73
3503.66	3905.42	3753.14	3012.27	3264.06	2925.56
3505.66	3894.72	3779.73	3016.61	3263.6	2903.78
3507.66	3902.23	3818.61	3035.94	3289.41	2865.43
3509.66	3969.69	3859.07	3053.2	3321.95	2835.83
3511.66	4079.23	3888.39	3069.94	3354.95	2830.46
3513.66	4258.45	3932.01	3075.88	3382.69	2819.09
3515.66	4502.1	3959.59	3093.53	3391.43	2815.12
3517.65	4820.93	3982.55	3140.24	3408.56	2818.53
3519.65	5116.41	4011.15	3212.76	3446.59	2826.77
3521.65	5419.59	4020.92	3304.76	3487.8	2836.68
3523.65	5620.74	4009.29	3397.44	3524.13	2853.81
3525.65	5613.02	4002.94	3480.65	3550.58	2870.92
3527.65	5541.32	3995.92	3536.23	3554.72	2883.86
3529.65	5493.19	3962.85	3569.23	3538.9	2882.29
3531.65	5483.8	3908.13	3561.04	3536.54	2856.69
3533.64	5465.87	3867.14	3529.63	3549.76	2831.87
3535.64	5393.04	3845.69	3452.36	3566.83	2805.23
3537.64	5255.52	3837.77	3359.82	3583.11	2771.83
3539.64	5067.13	3841.7	3265.94	3614.03	2750.7
3541.64	4866.25	3841.39	3181.43	3644.67	2737.87
3543.64	4665.25	3837.46	3110.88	3647.77	2736.79
3545.64	4473.66	3812.98	3081.4	3617.77	2747.85
3547.63	4284.07	3782.59	3097.2	3550.84	2779.96
3549.63	4165.62	3778.99	3140.94	3450.18	2824.18
3551.63	4061.44	3789.43	3215.74	3356.76	2865.43
3553.63	3987.87	3832.48	3305.76	3296.02	2897.16
3555.63	3908.87	3872.87	3390.86	3307.05	2915.74
3557.63	3828.2	3912.26	3467.51	3328.68	2915.41
3559.63	3739.85	3937.97	3537.17	3359.44	2887.1
3561.63	3664.07	3951.35	3589.27	3389.63	2858.88
3563.62	3639.39	3933.87	3621.4	3422.02	2836.78
3565.62	3645.3	3892.25	3643.82	3462.74	2821.76
3567.62	3653.69	3863.45	3650.66	3492.11	2812.22
3569.62	3670.34	3834.72	3611.91	3521.03	2811.93
3571.62	3680.62	3803.22	3526.52	3575.43	2818.64
3573.62	3682.64	3763.91	3423.78	3647.15	2824.35
3575.62	3686.84	3715.8	3313.19	3721.67	2837.56
3577.61	3666.51	3662.89	3231.31	3815.78	2842.7
3579.61	3641.08	3621.61	3213.16	3892.51	2857
3581.61	3636.02	3618.82	3199.94	3935.15	2873.53
3583.61	3647.25	3649.76	3187.63	3934.12	2887.82
3585.61	3678.53	3695.75	3157.32	3895.75	2883.5
3587.61	3703.95	3728.05	3111.22	3811.17	2856.53
3589.61	3710.1	3748.64	3048.2	3710.47	2823.9
3591.61	3716.87	3761.85	3008.42	3626.33	2803.24
3593.6	3723.29	3754.74	2998.27	3565.84	2782.3
3595.6	3712.74	3719.83	2981.06	3523.85	2774.53
3597.6	3685.61	3684.87	2957.71	3479.97	2769.08
3599.6	3638.07	3629.6	2956.55	3430.09	2754.16
3601.6	3602.88	3572.24	2956.93	3374.07	2734.62
3603.6	3573.07	3526.83	2968.15	3315.77	2726.39
3605.6	3555.34	3533.96	3007.39	3270.25	2732.48
3607.59	3551.92	3553.02	3058.18	3232.1	2745.33
3609.59	3568.07	3570.32	3102.64	3200.1	2771.25
3611.59	3586.59	3586.99	3164.31	3175.12	2798.66
3613.59	3620.26	3601.52	3267.9	3154	2820.86
3615.59	3679.29	3606.29	3373.25	3151.48	2834.8
3617.59	3746.83	3636.12	3428.81	3153.05	2844.95
3619.59	3800.15	3722.81	3452.36	3175.89	2878.52
3621.59	3818.1	3837.35	3446.83	3206.89	2931.44
3623.58	3919.06	3971.37	3411.69	3238.07	2987.97
3625.58	3988.96	4115.21	3327.86	3255.76	3062.46
3627.58	4069.77	4267.33	3232.03	3264.35	3122.46
3629.58	4167.32	4404.8	3146.65	3252.58	3165.78
3631.58	4267.13	4502.33	3084.8	3248.58	3210.94
3633.58	4369.35	4555.63	3080.67	3246.29	3231.58
3635.58	4502.62	4575.92	3088.56	3247.08	3220.39
3637.57	4650.84	4569.36	3085.57	3231.8	3172.31
3639.57	4792.19	4567.71	3091.01	3223.43	3090.13
3641.57	4890.64	4554.47	3105.44	3201.8	3004.56
3643.57	4901.72	4579.5	3147.05	3174.77	2930.51
3645.57	4874.85	4600.51	3195.46	3156.96	2871.78
3647.57	4893.2	4599.07	3240.61	3144.96	2843.77
3649.57	4898.15	4582.13	3281.79	3154.59	2822.1
3651.57	4826.34	4589.28	3303.32	3174.65	2800.44
3653.56	4686.95	4617.37	3329.85	3202.3	2788.95
3655.56	4487.63	4643.05	3372.34	3227.65	2793.6
3657.56	4246.16	4632.21	3385.1	3256.62	2799.74
3659.56	4184.05	4596.34	3362.74	3284.65	2809.89
3661.56	4044.61	4526.15	3327.21	3324.24	2826.72
3663.56	3980.47	4445.15	3277.66	3371.43	2836.25
3665.56	3913.52	4387.6	3230.87	3422.09	2839.95
3667.55	3854.52	4360.21	3179.16	3479.17	2838.81
3669.55	3834.22	4359.13	3162.31	3503.58	2825.76
3671.55	3849.81	4385.7	3128.44	3512.61	2807.42
3673.55	3889.37	4426.44	3075.51	3494.43	2793.06
3675.55	3945.3	4471.89	3033.24	3478.98	2776.12
3677.55	4003.96	4513.02	2993.72	3460.92	2771.47
3679.55	4050.92	4540.21	2977.46	3443.36	2776.08
3681.55	4084.23	4549.01	2958.81	3435.5	2782.88
3683.54	4093.53	4559.14	2952.39	3428.69	2768.86
3685.54	4078.83	4597.9	2971.62	3400.14	2758.79
3687.54	4073.63	4646.13	3010.77	3373.65	2745
3689.54	4063.43	4704.66	3069.27	3365.77	2728.81
3691.54	4050.93	4791.78	3149.57	3366.25	2718.57
3693.54	4043.03	4904.84	3234.58	3373.01	2707.07
3695.54	4047.46	5068.24	3322.64	3372.46	2706.91
3697.53	4050.99	5292.27	3409.49	3355.79	2717.5
3699.53	4059.03	5617.43	3473.85	3335.31	2740.65
3701.53	4039.01	5977.52	3505.94	3343.74	2760.27
3703.53	3992.59	6330.9	3507.17	3361.39	2768.33
3705.53	3947.96	6698.74	3475.61	3397.22	2764.77
3707.53	3892.91	7047.01	3390.46	3424.07	2758.22
3709.53	3854.81	7358.9	3282.9	3440.26	2757.37
3711.53	3817.73	7637.25	3188.99	3433.35	2754.43
3713.52	3777.72	7872.2	3105.68	3418.27	2757.63
3715.52	3732.71	8051.91	3056.62	3399.9	2775.27
3717.52	3695.49	8178.82	3018.55	3406.81	2800.39
3719.52	3662.89	8244.82	2989.82	3415.99	2842.9
3721.52	3634.56	8247.07	2989.62	3422.79	2889.66
3723.52	3593.25	8162.54	3006.67	3420.65	2937.78
3725.52	3541.8	8002.7	3014.11	3423.87	2983.35
3727.51	3523.27	7772.07	3033.5	3419.82	3011.17
3729.51	3550.13	7472.49	3055.41	3415.85	3014.23
3731.51	3608.69	7119.85	3063.22	3415.71	2987.23
3733.51	3683.5	6739.86	3056.64	3422.72	2937.28
3735.51	3792.9	6344.59	3061.91	3428.95	2892.22
3737.51	3956.73	5972.71	3059.52	3427.82	2845.17
3739.51	4145.38	5642.32	3072.76	3415.12	2793.32
3741.51	4345.13	5337.13	3112.36	3379.89	2765.33
3743.5	4563.87	5097.92	3155.99	3328.69	2751.49
3745.5	4799.84	4933.28	3191.96	3275.06	2748.32
3747.5	5038.32	4794.74	3218.27	3250.67	2738.77
3749.5	5248.38	4660.86	3225.03	3258.53	2731.36
3751.5	5443.55	4511	3196.93	3285.33	2706.7
3753.5	5594.83	4369.99	3172.16	3305.81	2685.68
3755.5	5713.09	4253.26	3179.98	3339.45	2671.57
3757.5	5773.24	4171.34	3169.39	3388.69	2671.4
3759.49	5776.29	4126.29	3137.57	3449.51	2685.45
3761.49	5700.2	4114.51	3124.7	3521.1	2701.94
3763.49	5541.74	4130.56	3101.25	3571.06	2722.1
3765.49	5318.99	4156.04	3076.9	3603.07	2730.73
3767.49	5034.43	4181.2	3071.94	3606.38	2755.09
3769.49	4718.97	4192.09	3072.38	3576.85	2786.31
3771.49	4463.38	4186.34	3090.79	3536.82	2813.6
3773.48	4273.59	4167.5	3097.53	3483.33	2826.11
3775.48	4154.44	4164.48	3109.21	3423.93	2820.73
3777.48	4103.29	4172.81	3153.25	3387.91	2811.5
3779.48	4071.34	4197.87	3212.87	3344.6	2820.18
3781.48	4073.04	4225.45	3269.48	3311.21	2822.43
3783.48	4094.78	4233.93	3311.21	3310.13	2815.36
3785.48	4116.89	4224.67	3370.69	3303.71	2822.64
3787.48	4134.02	4183.82	3426.46	3281.09	2822.59
3789.47	4140.35	4141.76	3461.46	3269.75	2804.71
3791.47	4146.75	4112.94	3469.7	3274.31	2785.22
3793.47	4184.81	4082.98	3469.06	3283.53	2766.92
3795.47	4215.03	4040.15	3480.59	3298.14	2752.52
3797.47	4219.15	3991.62	3470.66	3301.94	2727.59
3799.47	4186.6	3960.1	3459.11	3310.23	2723.38
3801.47	4119.66	3942.08	3453.29	3320.31	2719.87
3803.46	4050.51	3931.75	3429	3329.77	2724.77
3805.46	3974.3	3921.74	3398.41	3338.17	2742.87
3807.46	3945.96	3917.01	3335.95	3340.7	2760.73
3809.46	3958.24	3883.62	3252.39	3353.89	2776.02
3811.46	3957.6	3851.75	3179.73	3366.8	2789.19
3813.46	3953.52	3845.25	3107.29	3359.15	2807.99
3815.46	3948.93	3819.34	3088.17	3331.04	2826.91
3817.46	3937.21	3793.73	3098.78	3318.09	2841.86
3819.45	3956.03	3760.05	3111.04	3322.64	2843.9
3821.45	4006.36	3716.25	3121.2	3342.56	2828.85
3823.45	4089.46	3688.77	3135.86	3360.35	2808.63
3825.45	4169.45	3665.37	3157.73	3380.31	2788.36
3827.45	4257.26	3658.45	3169.58	3389.69	2775.85
3829.45	4336.26	3662.45	3174.29	3397.42	2776.98
3831.45	4388.42	3675.62	3177.86	3405.69	2786.9
3833.44	4381.82	3696.83	3202.14	3384.45	2811.4
3835.44	4330.14	3729.19	3223.04	3343.99	2823.9
3837.44	4233.44	3759.84	3239.22	3305.03	2829.34
3839.44	4114.67	3777.19	3248.14	3270.07	2833.12
3841.44	3977.15	3776.8	3260.41	3237.57	2839.67
3843.44	3866.45	3785.24	3256.7	3203.32	2838.26
3845.44	3836.1	3782.73	3239.77	3180.97	2819.21
3847.44	3828.87	3801.48	3199.65	3179.2	2783.02
3849.43	3854.46	3846.51	3176.7	3178.34	2745.69
3851.43	3885.23	3926.85	3186.43	3174.3	2702.51
3853.43	3909.62	4018.59	3204	3187.77	2668.01
3855.43	3921.47	4120.75	3206.89	3202.19	2639.78
3857.43	3920.65	4211.54	3203.62	3204.45	2614.37
3859.43	3906.65	4280.26	3225.72	3194.31	2596.12
3861.43	3913.51	4315.26	3248.07	3189	2592.96
3863.42	3926.61	4312.64	3244.16	3189.42	2609.98
3865.42	3925.5	4279.66	3212.63	3192.74	2622.08
3867.42	3909.44	4201.33	3139.53	3184.3	2634.09
3869.42	3859.41	4105.93	3055.84	3185.85	2658.42
3871.42	3808.71	4017.44	2992.94	3185.47	2690.7
3873.42	3781.28	3943.03	2956.14	3185.99	2722.56
3875.42	3766.58	3925.72	2926.11	3197.89	2742.64
3877.42	3751.14	3914.78	2897.74	3220.34	2767.85
3879.41	3770.28	3891.06	2883.62	3231.55	2792.47
3881.41	3822.61	3861.57	2859.45	3223.98	2794.4
3883.41	3885.9	3833.23	2852.97	3211.08	2781.71
3885.41	3955.83	3782.76	2854.97	3214.68	2782.11
3887.41	4007.95	3734.87	2875.42	3215.26	2778.31
3889.41	4034.86	3688.38	2883.06	3210.2	2774.39
3891.41	4041.39	3657.1	2895.12	3214.69	2764.24
3893.4	4032.07	3623.85	2914.56	3209.07	2758.69
3895.4	4023.6	3609.65	2916.77	3211.56	2753.09
3897.4	4009.94	3600.26	2904.3	3225.27	2754.89
3899.4	3972.41	3615.21	2868.64	3241.96	2753.59
3901.4	3921.22	3618.29	2847.93	3248.12	2736.16
3903.4	3879.23	3605.78	2842.25	3257.22	2706.39
3905.4	3846.3	3609.55	2840.91	3276.62	2682.86
3907.4	3837.23	3623.73	2829.33	3292.62	2655.59
3909.39	3842.58	3662.77	2816.27	3293.33	2633.73
3911.39	3860.47	3725.91	2830.7	3312.48	2609.65
3913.39	3869.06	3821.74	2836.86	3351.9	2588.98
3915.39	3868.81	3934.61	2843.92	3390.14	2570.44
3917.39	3848.99	4085.5	2875.27	3418.39	2550.83
3919.39	3802.2	4196.57	2922.56	3439.58	2536.27
3921.39	3739.83	4307.47	2969.03	3465.71	2543.53
3923.38	3683.19	4382.05	3009.19	3478.74	2545.87
3925.38	3634.3	4415.14	3049.54	3471.39	2539.39
3927.38	3609.34	4414.3	3075.46	3476.01	2536.56
3929.38	3608.37	4384.52	3093.16	3504.58	2541.44
3931.38	3601.76	4357.38	3110.18	3532.35	2542.53
3933.38	3593.3	4315.39	3098.6	3559.71	2549.5
3935.38	3587.96	4303.04	3075.49	3572.46	2558.55
3937.38	3592.32	4306.98	3059.34	3552.58	2563.63
3939.37	3615.5	4297.43	3032.37	3526.77	2573.01
3941.37	3666.99	4265.84	2994.23	3527.79	2582.02
3943.37	3737.29	4217.02	2960.55	3525.98	2595.29
3945.37	3817.76	4186.39	2957.54	3504.12	2609.74
3947.37	3856.86	4162.06	2959.19	3479.1	2621.65
3949.37	3858.76	4184.71	2969.24	3451.11	2630.51
3951.37	3836.87	4211	2973.37	3421.71	2648.78
3953.36	3798.87	4223.37	2960.83	3413.18	2674.68
3955.36	3773.28	4232.79	2953.28	3392.08	2708.34
3957.36	3770.7	4213.5	2932.25	3353.77	2737.2
3959.36	3749.06	4176.99	2908.52	3340.13	2766.14
3961.36	3711.93	4161.35	2904.71	3334.94	2793.9
3963.36	3691.9	4144.98	2919.23	3330.84	2814.73
3965.36	3673.45	4121.85	2932.71	3341.05	2832.1
3967.36	3677.54	4104.13	2937.82	3360.95	2841.34
3969.35	3669.59	4043.56	2920.1	3369.36	2854.64
3971.35	3668.04	3955.15	2907.72	3374.48	2877.72
3973.35	3665.84	3863.67	2924.57	3390.25	2892.33
3975.35	3664.78	3759.55	2962.62	3398.95	2915.45
3977.35	3667.46	3695.13	3008.53	3407.65	2933.92
3979.35	3668.49	3654.62	3064.78	3419.65	2947.1
3981.35	3649.02	3604.45	3102.36	3422.28	2958.15
3983.34	3617.97	3577	3119.27	3429.88	2959.33
3985.34	3596.64	3581.59	3115.03	3437.16	2941.76
3987.34	3573.29	3601.14	3106.88	3440.46	2911.99
3989.34	3548.73	3636.83	3101.77	3464.41	2883.7
[truncated: 1,004 more rows]
