# Supplementary material for: Ionogel thin films as a compatibilizing pretreatment for electrospray deposition
Source: Royal Society of Chemistry journal article supplement (doi:10.1039/d5lp00359h), 2026-01-01
Supplement: d5lp00359h1.zip [file C data - aligned.xlsx]

## Sheet: Sheet1
Lateral	Height Data	Height Data	Mean	Standard Deviation
µm	nm	nm	nm	nm
	3.1	3.2	Statistics On Rows of B"Height Data":C"Height Data"	Statistics On Rows of B"Height Data":C"Height Data"
0	10.4432	10.8897	10.6664	0.315696
1.33274	10.6092	13.8476	12.2284	2.28988
2.66548	11.3569	17.4571	14.407	4.31346
3.99822	12.0515	22.348	17.1997	7.28071
5.33096	12.8987	27.488	20.1933	10.3162
6.66371	12.9827	32.2346	22.6086	13.6132
7.99645	12.8978	36.6775	24.7876	16.8148
9.32919	12.9305	35.8298	24.3802	16.1922
10.6619	13.1485	29.1	21.1243	11.2794
11.9947	13.7578	32.8471	23.3024	13.4982
13.3274	14.9794	43.306	29.1427	20.0299
14.6602	15.7857	59.2273	37.5065	30.7179
15.9929	16.7819	81.4723	49.1271	45.7431
17.3256	19.1154	109.052	64.0836	63.5947
18.6584	21.4843	141.318	81.4014	84.7355
19.9911	24.4264	176.347	100.387	107.424
21.3239	28.2217	203.383	115.802	123.858
22.6566	32.3554	208.219	120.287	124.354
23.9893	35.5583	195.292	115.425	112.949
25.3221	35.4384	178.967	107.203	101.49
26.6548	25.8838	176.138	101.011	106.246
27.9876	19.1892	198.466	108.827	126.768
29.3203	18.2485	224.273	121.261	145.681
30.653	17.6757	230.457	124.066	150.459
31.9858	16.5902	224.224	120.407	146.819
33.3185	16.5744	214.263	115.419	139.787
34.6513	15.9532	216.193	116.073	141.591
35.984	15.9058	249.984	132.945	165.518
37.3167	15.9264	312.632	164.279	209.802
38.6495	16.9248	389.147	203.036	263.201
39.9822	18.6159	467.153	242.884	317.163
41.315	21.5863	522.85	272.218	354.447
42.6477	25.5009	552.927	289.214	372.946
43.9805	30.2525	559.401	294.827	374.165
45.3132	35.6545	542.041	288.848	358.069
46.6459	42.1574	504.786	273.472	327.128
47.9787	48.7389	455.999	252.369	287.976
49.3114	54.2292	406.444	230.337	249.054
50.6442	52.8894	367.897	210.393	222.744
51.9769	40.0763	349.799	194.938	219.007
53.3096	30.6094	358.282	194.446	231.7
54.6424	31.7466	377.201	204.474	244.273
55.9751	33.9139	387.181	210.547	249.797
57.3079	38.5808	392.112	215.346	249.984
58.6406	45.6143	397.569	221.591	248.869
59.9733	56.4722	407.157	231.815	247.972
61.3061	71.7918	409.343	240.567	238.685
62.6388	91.057	395.924	243.49	215.573
63.9716	114.282	372.889	243.585	182.863
65.3043	138.885	351.606	245.245	150.416
66.6371	157.399	348.634	253.016	135.223
67.9698	158.233	373.433	265.833	152.169
69.3025	151.382	418.033	284.707	188.55
70.6353	149.944	471.946	310.945	227.69
71.968	168.492	513.159	340.826	243.717
73.3008	190.578	536.485	363.531	244.593
74.6335	198.77	538.939	368.854	240.536
75.9662	183.583	520.303	351.943	238.097
77.299	152.025	481.709	316.867	233.122
78.6317	114.131	420.707	267.419	216.782
79.9645	83.3417	345.483	214.412	185.362
81.2972	72.1169	271.829	171.973	141.218
82.6299	64.2918	218.147	141.22	108.792
83.9627	55.9492	204.343	130.146	104.93
85.2954	48.714	210.708	129.711	114.547
86.6282	43.4031	233.872	138.637	134.682
87.9609	38.6185	278.242	158.43	169.44
89.2936	35.7323	344.9	190.316	218.615
90.6264	34.5451	433.388	233.966	282.024
91.9591	35.5152	537.327	286.421	354.834
93.2919	39.0351	625.857	332.446	414.946
94.6246	46.4631	695.964	371.213	459.266
95.9574	57.6555	748.231	402.943	488.31
97.2901	73.6752	784.02	428.848	502.29
98.6228	93.0036	804.954	448.979	503.425
99.9556	115.004	812.174	463.589	492.974
101.288	136.697	787.626	462.162	460.276
102.621	150.25	731.319	440.784	410.878
103.954	144.193	649.858	397.026	357.559
105.287	124.118	556.53	340.324	305.761
106.619	99.9611	467.397	283.679	259.816
107.952	91.7043	404.04	247.872	220.855
109.285	105.407	385.566	245.487	198.102
110.618	125.549	404.075	264.812	196.948
111.95	153.905	431.476	292.691	196.272
113.283	189.52	450.238	319.879	184.355
114.616	228.94	462.04	345.49	164.827
115.948	267.135	476.678	371.906	148.169
117.281	278.649	502.87	390.76	158.548
118.614	265.137	535.231	400.184	190.985
119.947	231.036	555.407	393.222	229.365
121.279	190.42	561.348	375.884	262.286
122.612	159.772	552.291	356.031	277.553
123.945	157.135	530.477	343.806	263.993
125.278	165.543	500.943	333.243	237.164
126.61	169.953	469.74	319.847	211.982
127.943	181.993	443.944	312.969	185.228
129.276	206.642	426.367	316.505	155.369
130.609	233.678	411.615	322.647	125.821
131.941	245.471	390.9	318.186	102.833
133.274	238.209	351.523	294.866	80.1252
134.607	219.589	299.066	259.328	56.1992
135.94	199.251	246.648	222.949	33.5145
137.272	192.509	208.7	200.605	11.4486
138.605	216.872	201.083	208.978	11.1643
139.938	259.184	220.262	239.723	27.5225
141.271	314.911	255.853	285.382	41.7601
142.603	367.217	309.003	338.11	41.1632
143.936	415.969	379.488	397.728	25.7958
145.269	463.785	457.023	460.404	4.78122
146.602	503.564	521.474	512.519	12.6642
147.934	524.163	569.775	546.969	32.2525
149.267	525.304	606.994	566.149	57.7636
150.6	509.198	636.306	572.752	89.8792
151.932	484.504	667.945	576.224	129.713
153.265	462.51	709.465	585.988	174.624
154.598	457.904	770.194	614.049	220.822
155.931	486.48	832.342	659.411	244.561
157.263	549.998	873.391	711.694	228.674
158.596	594.329	890.035	742.182	209.096
159.929	607.838	881.859	744.848	193.762
161.262	589.234	850.868	720.051	185.003
162.594	541.206	804.485	672.846	186.167
163.927	470.742	753.3	612.021	199.799
165.26	387.135	712.879	550.007	230.336
166.593	304.204	702.842	503.523	281.88
167.925	235.708	742.31	489.009	358.222
169.258	198.011	842.4	520.205	455.652
170.591	178.086	947.008	562.547	543.71
171.924	164.76	1043.28	604.02	621.208
173.256	158.146	1124.4	641.275	683.247
174.589	161.429	1186.91	674.167	725.122
175.922	173.109	1230.55	701.831	747.726
177.255	193.855	1255.41	724.63	750.63
178.587	215.139	1265.52	740.332	742.735
179.92	235.294	1266.21	750.753	728.969
181.253	263.196	1264.22	763.706	707.829
182.586	303.347	1262.79	783.068	678.429
183.918	327.512	1263.45	795.481	661.808
185.251	326.743	1264.33	795.537	662.974
186.584	308.639	1258.36	783.499	671.554
187.916	284.745	1246.39	765.568	679.987
189.249	273.265	1234.62	753.944	679.783
190.582	293.248	1230.41	761.828	662.672
191.915	331.729	1242.57	787.152	644.065
193.247	360.007	1278.97	819.489	649.805
194.58	364.412	1340.85	852.63	690.444
195.913	352.809	1397.1	874.954	738.423
197.246	335.445	1444.32	889.88	784.09
198.578	325.282	1479.23	902.258	815.967
199.911	333.875	1502.24	918.057	826.159
201.244	355.556	1512.07	933.813	817.779
202.577	393.117	1514.76	953.941	793.125
203.909	433.666	1512.84	973.252	763.089
205.242	467.432	1512.13	989.781	738.713
206.575	493.11	1515.24	1004.17	722.753
207.908	506.341	1522.76	1014.55	718.716
209.24	496.823	1529.66	1013.24	730.323
210.573	462.562	1534.27	998.419	757.815
211.906	408.767	1534.92	971.846	796.314
213.239	343.712	1537.61	940.663	844.217
214.571	280.507	1546.68	913.593	895.32
215.904	235.986	1569.44	902.715	942.898
217.237	224.439	1607.5	915.97	977.972
218.57	226.044	1662.57	944.307	1015.78
219.902	235.474	1722.61	979.041	1051.56
221.235	250.348	1779.49	1014.92	1081.27
222.568	257.542	1830.11	1043.83	1111.98
223.9	255.14	1874.33	1064.73	1144.94
225.233	248.835	1910.35	1079.59	1174.87
226.566	246.09	1938.63	1092.36	1196.8
227.899	253.86	1962.1	1107.98	1207.91
229.231	281.163	1981.71	1131.43	1202.47
230.564	326.904	1996.64	1161.77	1180.68
231.897	382.725	2006.87	1194.8	1148.45
233.23	436.039	2013.58	1224.81	1115.49
234.562	476.282	2016.57	1246.43	1089.15
235.895	503.036	2019.54	1261.29	1072.33
237.228	523.27	2024.64	1273.96	1061.63
238.561	543.121	2032.93	1288.03	1053.45
239.893	558.074	2044.32	1301.2	1050.93
241.226	540.368	2060.54	1300.45	1074.92
242.559	488.699	2080.27	1284.48	1125.41
243.892	414.488	2101.95	1258.22	1193.21
245.224	331.495	2122.91	1227.2	1266.72
246.557	260.122	2142.68	1201.4	1331.17
247.89	222.648	2158.07	1190.36	1368.55
249.223	215.773	2167.45	1191.61	1380.05
250.555	218.462	2167.06	1192.76	1377.86
251.888	233.618	2157.1	1195.36	1360.11
253.221	260.392	2135.77	1198.08	1326.09
254.554	298.019	2104.81	1201.42	1277.6
255.886	337.191	2065.66	1201.42	1222.21
257.219	366.929	2023.66	1195.29	1171.48
258.552	388.741	1985.28	1187.01	1128.92
259.884	404.828	1959.6	1182.21	1099.39
261.217	415.614	1953.9	1184.76	1087.73
262.55	426.655	1974.68	1200.67	1094.62
263.883	435.021	2023.57	1229.3	1123.28
265.215	440.478	2096.55	1268.51	1171.02
266.548	447.857	2177.61	1312.73	1223.12
267.881	467.559	2253.95	1360.75	1263.17
269.214	505.619	2320.2	1412.91	1283.1
270.546	547.062	2373.1	1460.08	1291.21
271.879	584.92	2409.33	1497.12	1290.05
273.212	610.386	2424.66	1517.52	1282.89
274.545	626.799	2416.37	1521.59	1265.42
275.877	639	2384.45	1511.72	1234.22
277.21	649.507	2333.19	1491.35	1190.55
278.543	664.942	2268.95	1466.94	1134.2
279.876	690.548	2205.36	1447.95	1071.13
281.208	727.337	2156.49	1441.91	1010.56
282.541	761.87	2139.46	1450.67	974.106
283.874	786.836	2167.99	1477.41	976.621
285.207	793.676	2252.16	1522.92	1031.31
286.539	778.352	2377.98	1578.16	1131.1
287.872	741.731	2515.45	1628.59	1254.21
289.205	692.815	2653.13	1672.97	1386.15
290.538	641.961	2788.72	1715.34	1517.99
291.87	602.487	2916.55	1759.52	1636.29
293.203	587.45	3030.25	1808.85	1727.32
294.536	589.849	3123.15	1856.5	1791.31
295.869	583.22	3188.85	1886.03	1842.46
297.201	573.573	3223.63	1898.6	1873.87
298.534	573.356	3224.66	1899.01	1874.75
299.867	593.977	3189.51	1891.74	1835.32
301.199	623.789	3119.94	1871.87	1765.05
302.532	649.599	3017.61	1833.61	1674.44
303.865	668.263	2886.85	1777.56	1568.78
305.198	681.063	2736.44	1708.75	1453.37
306.53	689.319	2577.55	1633.43	1335.18
307.863	685.497	2423.94	1554.72	1229.27
309.196	668.756	2289.5	1479.13	1146.04
310.529	644.21	2189.37	1416.79	1092.59
311.861	620.388	2135.69	1378.04	1071.48
313.194	605.839	2130.79	1368.31	1078.3
314.527	608.877	2161.46	1385.17	1097.84
315.86	610.209	2223.43	1416.82	1140.72
317.192	600.617	2306	1453.31	1205.89
318.525	577.22	2405.76	1491.49	1292.97
319.858	547.569	2516.27	1531.92	1392.08
321.191	519.824	2638.57	1579.2	1498.18
322.523	505.599	2771.25	1638.43	1602.06
323.856	506.656	2913.1	1709.88	1701.61
325.189	492.403	3059.61	1776.01	1815.29
326.522	459.382	3206.11	1832.74	1942.23
327.854	416.757	3343.8	1880.28	2069.73
329.187	374.507	3465.17	1919.84	2185.43
330.52	347.602	3565.31	1956.46	2275.27
331.853	331.641	3638.09	1984.86	2338.01
333.185	327.661	3678.49	2003.08	2369.4
334.518	345.337	3682.28	2013.81	2359.57
335.851	383.867	3647.13	2015.5	2307.47
337.183	417.068	3572.86	1994.96	2231.48
338.516	434.409	3462.6	1948.51	2141.26
339.849	443.484	3323.65	1883.57	2036.59
341.182	453.818	3166.1	1809.96	1917.87
342.514	476.105	3006.31	1741.21	1789.13
343.847	517.178	2867.28	1692.23	1661.77
345.18	572.275	2773.82	1673.05	1556.73
346.513	610.023	2751.18	1680.6	1514.03
347.845	620.767	2823.5	1722.13	1557.57
349.178	607.257	2999.18	1803.22	1691.34
350.511	580.594	3205.13	1892.86	1855.83
351.844	551.353	3424.04	1987.7	2031.3
353.176	535.411	3644.35	2089.88	2198.35
354.509	538.774	3865.88	2202.33	2352.62
355.842	543.59	4078.79	2311.19	2499.76
357.175	526.506	4281.17	2403.84	2654.95
358.507	496.101	4469.49	2482.79	2809.61
359.84	458.829	4645.19	2552.01	2960.2
361.173	423.37	4808.32	2615.85	3100.63
362.506	401.259	4959.73	2680.49	3223.32
363.838	408.353	5102.01	2755.18	3318.92
365.171	450.643	5238.4	2844.52	3385.46
366.504	490.791	5370.9	2930.85	3450.76
367.837	512.529	5500.19	3006.36	3526.81
369.169	521.09	5620.96	3071.03	3606.16
370.502	517.139	5722.82	3119.98	3680.97
371.835	509.148	5794.04	3151.59	3736.98
373.167	498.138	5825.91	3162.02	3767.3
374.5	483.406	5811.31	3147.36	3767.4
375.833	475.198	5743.02	3109.11	3724.91
377.166	489.117	5615.07	3052.09	3624.6
378.498	539.825	5424.07	2981.95	3453.68
379.831	602.572	5169.94	2886.26	3229.62
381.164	644.723	4860.1	2752.41	2980.72
382.497	671.842	4505.46	2588.65	2710.78
383.829	686.27	4120.19	2403.23	2428.15
385.162	688.906	3725.76	2207.34	2147.38
386.495	680.44	3352.32	2016.38	1889.31
387.828	660.575	3032.54	1846.56	1677.23
389.16	636.953	2800	1718.48	1529.5
390.493	616.509	2687.96	1652.23	1464.74
391.826	606.555	2722.91	1664.73	1496.49
393.159	606.778	2863.86	1735.32	1596
394.491	625.911	3046.99	1836.45	1711.96
395.824	660.515	3225.52	1943.02	1813.73
397.157	691.714	3389.94	2040.83	1907.93
398.49	716.423	3546.07	2131.25	2000.86
399.822	733.615	3692.16	2212.89	2092.01
401.155	734.338	3824.74	2279.54	2185.24
402.488	718.525	3936.68	2327.6	2275.58
403.821	688.156	4027.02	2357.59	2360.94
405.153	649.722	4084.76	2367.24	2428.94
406.486	610.394	4104.22	2357.31	2470.51
407.819	578.146	4080.8	2329.47	2476.75
409.151	563.531	4014.44	2288.99	2440.16
410.484	563.407	3906.46	2234.94	2363.9
411.817	558.482	3759.29	2158.88	2263.31
413.15	553.3	3577.75	2065.53	2138.61
414.482	560.532	3365.88	1963.21	1983.68
415.815	589.823	3132.61	1861.21	1798.02
417.148	618.317	2891.73	1755.02	1607.54
418.481	626.047	2659.78	1642.91	1438.07
419.813	620.98	2455.9	1538.44	1297.49
421.146	609.329	2298.12	1453.72	1194.15
422.479	597.415	2189.74	1393.58	1125.94
423.812	586.251	2131.31	1358.78	1092.52
425.144	575.619	2141.56	1358.59	1107.29
426.477	568.531	2242.74	1405.63	1183.84
427.81	569.488	2452.27	1510.88	1331.33
429.143	577.9	2764.92	1671.41	1546.46
430.475	592.92	3083.98	1838.45	1761.45
431.808	616.334	3401.02	2008.68	1969.07
433.141	639.806	3712.3	2176.05	2172.58
434.474	653.662	4007.96	2330.81	2371.85
435.806	655.245	4279.99	2467.62	2563.08
437.139	644.155	4526.17	2585.16	2745
438.472	626.963	4743.27	2685.12	2910.67
439.805	611.714	4927.36	2769.54	3051.62
441.137	610.933	5079.13	2845.03	3159.49
442.47	633.918	5200.73	2917.32	3229.22
443.803	660.736	5293.53	2977.13	3275.88
445.135	670.702	5360.35	3015.53	3316.08
446.468	669.342	5399.71	3034.52	3344.87
447.801	662.823	5411.99	3037.4	3358.17
449.134	658.875	5397.28	3028.08	3350.56
450.466	659.367	5354.85	3007.11	3320.21
451.799	659.525	5284.05	2971.79	3270.03
453.132	663.471	5184.34	2923.91	3196.74
454.465	678.294	5049.79	2864.04	3091.12
455.797	704.95	4872.73	2788.84	2947.07
457.13	735.149	4650.63	2692.89	2768.66
458.463	765.788	4385.77	2575.78	2559.72
459.796	797.734	4081.5	2439.62	2321.98
461.128	825.092	3748.34	2286.71	2067.05
462.461	845.885	3399.23	2122.56	1805.49
463.794	855.567	3055.63	1955.6	1555.68
465.127	855.964	2743.22	1799.59	1334.49
466.459	839.034	2486.14	1662.59	1164.68
467.792	806.234	2305.15	1555.69	1059.89
469.125	763.443	2219.88	1491.66	1029.85
470.458	722.88	2216.45	1469.66	1056.11
471.79	698.82	2253.79	1476.3	1099.53
473.123	705.177	2304.73	1504.95	1131.06
474.456	734.569	2359.12	1546.85	1148.73
475.789	748.04	2413.52	1580.78	1177.67
477.121	745.695	2465.9	1605.8	1216.37
478.454	731.692	2517.77	1624.73	1262.95
479.787	712.215	2575.7	1643.96	1317.68
481.12	693.081	2648.84	1670.96	1382.93
482.452	679.466	2750.72	1715.09	1464.6
483.785	672.626	2892.18	1782.4	1569.46
485.118	670.21	3082.77	1876.49	1705.94
486.45	664.596	3322.2	1993.4	1879.21
487.783	655.774	3584.09	2119.93	2070.63
489.116	648.807	3854.03	2251.42	2266.43
490.449	651.646	4122.73	2387.19	2454.43
491.781	670.871	4384.48	2527.68	2625.92
493.114	710.186	4630.54	2670.36	2772.11
494.447	760.551	4855.72	2808.14	2895.72
495.78	808.802	5057.53	2933.16	3004.3
497.112	849.516	5234.85	3042.18	3100.9
498.445	877.976	5384.15	3131.06	3186.34
499.778	894.004	5505.05	3199.52	3260.5
501.111	897.159	5599.62	3248.39	3325.14
502.443	893.005	5668.42	3280.71	3376.73
503.776	884.977	5709.92	3297.45	3411.75
505.109	876.365	5725.71	3301.04	3429.01
506.442	866.044	5714.79	3290.42	3428.58
507.774	855.69	5673.73	3264.71	3406.87
509.107	843.589	5598.82	3221.2	3362.46
510.44	828.987	5485.47	3157.23	3292.63
511.773	812.02	5325.68	3068.85	3191.64
513.105	795.645	5114.69	2955.17	3054.03
514.438	784.642	4848.66	2816.65	2873.69
515.771	790.109	4526.19	2658.15	2641.81
517.104	822.546	4154.31	2488.43	2355.91
518.436	881.536	3748.13	2314.84	2026.99
519.769	925.318	3328.55	2126.94	1699.34
521.102	944.592	2923.98	1934.29	1399.64
522.434	938.52	2574.46	1756.49	1156.78
523.767	908.721	2323.03	1615.88	1000.07
525.1	861.871	2209.09	1535.48	952.626
526.433	804.295	2263.81	1534.05	1032.03
527.765	745.98	2477.01	1611.5	1224.02
529.098	696.624	2731.95	1714.29	1439.2
530.431	666.109	3007.59	1836.85	1655.67
531.764	653.826	3291.99	1972.91	1865.46
533.096	650.614	3574.98	2112.8	2067.84
534.429	650.125	3851.85	2250.99	2263.96
535.762	646.786	4116.4	2381.59	2453.39
537.095	643.561	4360.44	2502	2628.23
538.427	644.657	4580.66	2612.66	2783.17
539.76	649.574	4773.79	2711.68	2916.26
541.093	657.325	4937.26	2797.29	3026.37
542.426	670.294	5065.54	2867.92	3107.91
543.758	692.177	5154.72	2923.45	3155.5
545.091	718.074	5202.79	2960.43	3171.17
546.424	740.741	5211.16	2975.95	3161.07
547.757	760.446	5183.06	2971.75	3127.26
549.089	781.267	5122.49	2951.88	3069.71
550.422	806.781	5035.14	2920.96	2989.9
551.755	838.097	4928.93	2883.51	2892.66
553.088	870.714	4813.06	2841.89	2787.66
554.42	899.845	4697.67	2798.76	2685.47
555.753	922.649	4592.25	2757.45	2594.8
557.086	939.389	4503.85	2721.62	2520.46
558.418	951.327	4432.9	2692.12	2461.85
559.751	959.953	4372.22	2666.09	2412.84
561.084	964.912	4316.68	2640.8	2370.06
562.417	965.192	4257.37	2611.28	2327.92
563.749	962.716	4189.74	2576.23	2281.85
565.082	962.65	4109.39	2536.02	2225.08
566.415	970.782	4012.31	2491.55	2150.68
567.748	990.199	3898.01	2444.1	2056.13
569.08	1020.28	3768.45	2394.37	1943.25
570.413	1046.88	3626.44	2336.66	1824.02
571.746	1060.07	3480.24	2270.16	1711.32
573.079	1057.56	3334.5	2196.03	1610.04
574.411	1039.8	3196.26	2118.03	1524.85
575.744	1007.74	3068.41	2038.08	1457.12
577.077	965.468	2952.83	1959.15	1405.28
578.41	916.719	2837.35	1877.04	1358.09
579.742	867.928	2712.33	1790.13	1304.19
581.075	824.331	2578.4	1701.37	1240.32
582.408	791.771	2442.57	1617.17	1167.29
583.741	773.883	2310.17	1542.02	1086.32
585.073	766.81	2186.41	1476.61	1003.81
586.406	751.654	2079.37	1415.51	938.84
587.739	732.026	1993.71	1362.87	892.143
589.072	717.148	1929.42	1323.29	857.208
590.404	716.074	1883.54	1299.81	825.525
591.737	732.05	1842.54	1287.3	785.238
593.07	756.549	1801.45	1279	738.856
594.402	784.481	1763.09	1273.78	691.979
595.735	813.855	1734.1	1273.98	650.71
597.068	842.424	1722.37	1282.4	622.215
598.401	869.533	1729.4	1299.47	608.018
599.733	894.447	1747.36	1320.9	603.097
601.066	916.465	1770.42	1343.44	603.835
602.399	931.849	1800.36	1366.1	614.13
603.732	936.871	1840.89	1388.88	639.238
605.064	931.02	1895.11	1413.06	681.713
606.397	916.555	1961.67	1439.11	739.005
607.73	896.002	2043.76	1469.88	811.585
609.063	872.315	2140.59	1506.45	896.808
610.395	850.043	2240.35	1545.2	983.094
611.728	831.591	2332.62	1582.11	1061.39
613.061	820.54	2413.05	1616.8	1126.08
614.394	818.732	2477.71	1648.22	1173.07
615.726	823.29	2524.46	1673.87	1202.91
617.059	829.984	2552.68	1691.33	1218.13
618.392	837.854	2562.52	1700.19	1219.52
619.725	845.142	2554.57	1699.86	1208.75
621.057	856.887	2531.58	1694.23	1184.19
622.39	880.528	2495.01	1687.77	1141.61
623.723	922.009	2444.63	1683.32	1076.66
625.056	983.129	2380.25	1681.69	987.913
626.388	1038.86	2305.21	1672.04	895.445
627.721	1082.16	2222.96	1652.56	806.665
629.054	1108.09	2144.19	1626.14	732.633
630.386	1114.99	2083.67	1599.33	684.961
631.719	1105.22	2055.13	1580.17	671.687
633.052	1083.74	2073.05	1578.39	699.548
634.385	1056.82	2144.45	1600.63	769.074
635.717	1030.16	2270	1650.08	876.694
637.05	1009.86	2435.56	1722.71	1008.13
638.383	1001.94	2626.42	1814.18	1148.68
639.716	1014.06	2835.94	1925	1288.26
641.048	1040.8	3059.04	2049.92	1427.11
642.381	1072.92	3289.45	2181.19	1567.33
643.714	1108.22	3517.5	2312.86	1703.62
645.047	1150.43	3731.41	2440.92	1825.03
646.379	1202.78	3925.76	2564.27	1925.44
647.712	1265.22	4094.27	2679.74	2000.44
649.045	1332.16	4231.27	2781.71	2049.98
650.378	1387.38	4329.12	2858.25	2080.12
651.71	1420.27	4383.84	2902.06	2095.56
653.043	1426.44	4388.99	2907.72	2094.84
654.376	1405.06	4341.83	2873.45	2076.61
655.709	1360.73	4239.73	2800.23	2035.76
657.041	1300.58	4083.66	2692.12	1967.94
658.374	1233.52	3876.75	2555.14	1869.04
659.707	1172.3	3630.79	2401.54	1738.41
661.04	1127.57	3360.61	2244.09	1578.99
662.372	1103.58	3088.38	2095.98	1403.47
663.705	1097.03	2844.37	1970.7	1235.55
665.038	1095.69	2662.63	1879.16	1107.99
666.371	1091.7	2574.59	1833.15	1048.57
667.703	1085.63	2609.19	1847.41	1077.32
669.036	1080.38	2777.83	1929.1	1200.28
670.369	1076.08	2982.84	2029.46	1348.28
671.701	1071.66	3217.26	2144.46	1517.17
673.034	1065.77	3476.11	2270.94	1704.37
674.367	1053.74	3750.36	2402.05	1906.8
675.7	1035.52	4033.95	2534.73	2120.21
677.032	1013.91	4320.99	2667.45	2338.46
678.365	994.563	4601.99	2798.28	2550.84
679.698	981.656	4869.98	2925.82	2749.46
681.031	977.173	5122.31	3049.74	2931.06
682.363	978.465	5355.27	3166.87	3094.87
683.696	983.495	5563.62	3273.56	3238.64
685.029	994.144	5744.45	3369.3	3358.97
686.362	1009.57	5896.35	3452.96	3455.48
687.694	1030.44	6016.05	3523.24	3525.36
689.027	1060.98	6099.25	3580.11	3562.59
690.36	1105.8	6146.43	3626.11	3564.27
691.693	1163.46	6157.21	3660.33	3531.12
693.025	1217.34	6131.97	3674.65	3475.17
694.358	1262.6	6073.8	3668.2	3402.03
695.691	1298.56	5986.06	3642.31	3314.57
697.024	1325.01	5868.73	3596.87	3212.9
698.356	1344.02	5724.46	3534.24	3097.44
699.689	1357.37	5555.41	3456.39	2968.46
701.022	1366.98	5362.23	3364.61	2825.07
702.355	1375.51	5144.23	3259.87	2664.88
703.687	1381.51	4900.23	3140.87	2488.11
705.02	1383.46	4623.73	3003.59	2291.21
706.353	1379.18	4311.33	2845.25	2073.34
707.685	1368.31	3964.25	2666.28	1835.6
709.018	1350.99	3584.55	2467.77	1579.36
710.351	1329.13	3177.29	2253.21	1306.85
711.684	1301.53	2751.86	2026.69	1025.54
713.016	1265.83	2326.51	1796.17	750.013
714.349	1224.24	1923.06	1573.65	494.135
715.682	1180.74	1565.22	1372.98	271.866
717.015	1141.74	1277.44	1209.59	95.956
718.347	1114.77	1081.78	1098.27	23.3249
719.68	1106.42	979.419	1042.92	89.8025
721.013	1117.91	939.322	1028.62	126.284
722.346	1143.07	955.975	1049.52	132.294
723.678	1173.11	1021.9	1097.51	106.92
725.011	1203.31	1124.45	1163.88	55.7595
726.344	1228.22	1269.77	1248.99	29.387
727.677	1245.46	1462.15	1353.81	153.223
729.009	1253.18	1659.51	1456.35	287.319
730.342	1250.35	1852.5	1551.43	425.788
731.675	1237.75	2037.63	1637.69	565.598
733.008	1217.77	2210.79	1714.28	702.176
734.34	1192.99	2371.05	1782.02	833.01
735.673	1167.77	2516.2	1841.98	953.479
737.006	1147.43	2643.36	1895.4	1057.78
738.339	1134.08	2750.82	1942.45	1143.21
739.671	1126.35	2836.97	1981.66	1209.6
741.004	1123.95	2897.38	2010.67	1254
742.337	1128.19	2926.1	2027.14	1271.32
743.669	1140.2	2919.9	2030.05	1258.44
745.002	1158.28	2877.17	2017.73	1215.44
746.335	1184.18	2797.8	1990.99	1141
747.668	1221.31	2685.29	1953.3	1035.19
749	1274.8	2549.1	1911.95	901.066
750.333	1347.55	2402.25	1874.9	745.783
751.666	1430.8	2263.5	1847.15	588.806
752.999	1514.53	2150.24	1832.38	449.518
754.331	1594.54	2077.65	1836.1	341.61
755.664	1665.95	2052.18	1859.06	273.11
756.997	1724.5	2069.89	1897.2	244.228
758.33	1768.04	2108.76	1938.4	240.925
759.662	1790.02	2160.71	1975.37	262.117
760.995	1783.37	2221.96	2002.66	310.125
762.328	1745.66	2287.46	2016.56	383.11
763.661	1681.18	2352.02	2016.6	474.355
764.993	1596.66	2410.38	2003.52	575.388
766.326	1505.38	2453.37	1979.37	670.329
767.659	1421.78	2474.67	1948.22	744.505
768.992	1361.44	2474.81	1918.13	787.265
770.324	1337.74	2462.6	1900.17	795.395
771.657	1355.5	2450.71	1903.1	774.432
772.99	1393.61	2456.64	1925.13	751.674
774.323	1439.67	2497.78	1968.73	748.198
775.655	1479.69	2588.83	2034.26	784.28
776.988	1505.19	2734.61	2119.9	869.331
778.321	1513.2	2909.27	2211.23	987.164
779.653	1503.59	3097.39	2300.49	1126.99
780.986	1476.84	3293.8	2385.32	1284.79
782.319	1437.42	3495.56	2466.49	1455.32
783.652	1389.74	3699.36	2544.55	1633.14
784.984	1340.7	3898.2	2619.45	1808.43
786.317	1295.45	4084.4	2689.93	1972.09
787.65	1262.27	4252.7	2757.49	2114.56
788.983	1250.18	4402.75	2826.47	2229.2
790.315	1265.52	4534.06	2899.79	2311.21
791.648	1306.52	4644.26	2975.39	2360.14
792.981	1358.16	4735.17	3046.67	2387.91
794.314	1415.68	4807.16	3111.42	2398.14
795.646	1481.42	4858.96	3170.19	2388.28
796.979	1560.37	4890.6	3225.48	2354.83
798.312	1654.24	4903.21	3278.73	2297.37
799.645	1758.65	4897.14	3327.89	2219.24
800.977	1853.46	4874.05	3363.75	2135.88
802.31	1924.9	4837.11	3381	2059.24
803.643	1965.22	4787.73	3376.47	1995.81
804.976	1972.8	4726.94	3349.87	1947.47
806.308	1948.79	4656.44	3302.61	1914.6
807.641	1898.43	4577.68	3238.05	1894.52
808.974	1830.76	4488.4	3159.58	1879.23
810.307	1760.09	4384.41	3072.25	1855.68
811.639	1700.18	4263.02	2981.6	1812.2
812.972	1665.77	4124.43	2895.1	1738.54
814.305	1669.87	3972.81	2821.34	1628.43
815.637	1697.59	3814.95	2756.27	1497.2
816.97	1712.18	3660.04	2686.11	1377.35
818.303	1710.86	3520.76	2615.81	1279.8
819.636	1694.47	3413.23	2553.85	1215.35
820.968	1666.68	3353.6	2510.14	1192.84
822.301	1634.92	3354.19	2494.56	1215.71
823.634	1606.8	3423.66	2515.23	1284.72
824.967	1591.5	3548.93	2570.22	1384.12
826.299	1594.61	3699.75	2647.18	1488.56
827.632	1624.86	3863.83	2744.34	1583.19
828.965	1685.52	4031.96	2858.74	1659.18
830.298	1774.02	4198.2	2986.11	1714.16
831.63	1890.79	4361.13	3125.96	1746.8
832.963	2036.64	4516.86	3276.75	1753.78
834.296	2196.71	4660.38	3428.54	1742.07
835.629	2349.42	4785.68	3567.55	1722.7
836.961	2485.11	4887.44	3686.28	1698.71
838.294	2596.69	4959.19	3777.94	1670.54
839.627	2678.16	4994.95	3836.56	1638.22
840.96	2727.7	4991.14	3859.42	1600.49
842.292	2741.37	4944.88	3843.12	1558.12
843.625	2720.25	4853.55	3786.9	1508.47
844.958	2668.44	4719.09	3693.77	1450.03
846.291	2592.45	4546.44	3569.45	1381.68
847.623	2499.23	4343.53	3421.38	1304.12
848.956	2399.84	4118.55	3259.19	1215.31
850.289	2305.18	3880.57	3092.88	1113.97
851.622	2222.55	3648.13	2935.34	1008.04
852.954	2157.83	3441.95	2799.89	908.006
854.287	2108.59	3265.23	2686.91	817.868
855.62	2066.05	3120.28	2593.16	745.452
856.952	2026.37	3011.08	2518.73	696.299
858.285	1987.94	2944.83	2466.39	676.625
859.618	1949.6	2928.19	2438.9	691.967
860.951	1911.8	2982.86	2447.33	757.35
862.283	1874.97	3092.82	2483.89	861.149
863.616	1843.7	3213.22	2528.46	968.401
864.949	1823.46	3336.82	2580.14	1070.11
866.282	1821.8	3466.91	2644.35	1163.27
867.614	1844	3603.09	2723.54	1243.86
868.947	1891.59	3740.04	2815.82	1307.05
870.28	1967.08	3874.61	2920.85	1348.83
871.613	2076.84	4000.89	3038.87	1360.5
872.945	2215.33	4113.99	3164.66	1342.56
874.278	2360.77	4209.4	3285.09	1307.18
875.611	2511.12	4286.81	3398.96	1255.61
876.944	2661.43	4342.66	3502.05	1188.81
878.276	2803.56	4374.07	3588.81	1110.52
879.609	2930.4	4380.41	3655.4	1025.31
880.942	3034.45	4364.9	3699.68	940.768
882.275	3108.04	4331.2	3719.62	864.908
883.607	3145.47	4286.53	3716	806.853
884.94	3145.35	4238.62	3691.99	773.057
886.273	3107.21	4193.12	3650.16	767.851
887.606	3034.7	4154.27	3594.49	791.656
888.938	2938.12	4126.24	3532.18	840.132
890.271	2829.65	4110.55	3470.1	905.732
891.604	2725.4	4109.85	3417.63	978.947
892.936	2641.53	4125.41	3383.47	1049.26
894.269	2587.75	4150.21	3368.98	1104.83
895.602	2566.16	4174.5	3370.33	1137.27
896.935	2576.85	4190.37	3383.61	1140.93
898.267	2608.76	4193.01	3400.88	1120.23
899.6	2643.01	4175.84	3409.42	1083.88
900.933	2668.69	4128.44	3398.56	1032.2
902.266	2678.97	4042.52	3360.74	964.176
903.598	2668.68	3915.85	3292.26	881.888
904.931	2635.07	3753.17	3194.12	790.619
906.264	2577.65	3563.93	3070.79	697.401
907.597	2498.83	3363.51	2931.17	611.417
908.929	2403.75	3173.51	2788.63	544.302
910.262	2301.29	3019.51	2660.4	507.857
911.595	2199.35	2926.51	2562.93	514.177
912.928	2105.63	2921.21	2513.42	576.699
914.26	2023.39	3000.57	2511.98	690.974
915.593	1956.23	3096.86	2526.55	806.547
916.926	1908.43	3205.07	2556.75	916.865
918.259	1888.07	3314.55	2601.31	1008.67
919.591	1899.39	3418.69	2659.04	1074.31
920.924	1946.4	3512.7	2729.55	1107.54
922.257	2015.34	3588.33	2801.83	1112.27
923.59	2080.4	3637.69	2859.04	1101.17
924.922	2135.58	3657.16	2896.37	1075.92
926.255	2177.95	3643.14	2910.54	1036.04
927.588	2207.75	3596.48	2902.11	981.982
928.92	2224.21	3522.23	2873.22	917.836
930.253	2227.87	3430.79	2829.33	850.591
931.586	2219.17	3337.21	2778.19	790.572
932.919	2197.24	3262.97	2730.1	753.589
934.251	2160.61	3227.45	2694.03	754.369
935.584	2108.54	3247.61	2678.07	805.446
936.917	2042.32	3330.26	2686.29	910.713
938.25	1969.03	3411.43	2690.23	1019.93
939.582	1898.19	3481.54	2689.86	1119.59
940.915	1845.05	3538.39	2691.72	1197.37
942.248	1820.6	3578.21	2699.4	1242.82
943.581	1835.81	3602.1	2718.96	1248.96
944.913	1880.58	3610.55	2745.56	1223.27
946.246	1916.32	3605.29	2760.8	1194.28
947.579	1938.24	3587.73	2762.99	1166.37
948.912	1949.98	3557.37	2753.68	1136.6
950.244	1951.28	3516.42	2733.85	1106.73
951.577	1949.67	3465.09	2707.38	1071.56
952.91	1951.14	3400.19	2675.66	1024.63
954.243	1965.55	3323.1	2644.33	959.932
955.575	1996.69	3237.36	2617.03	877.288
956.908	2049.52	3148.17	2598.85	776.865
958.241	2123.41	3064.73	2594.07	665.616
959.574	2216.44	2995.64	2606.04	550.978
960.906	2321.42	2949.21	2635.31	443.911
962.239	2425.25	2931.1	2678.18	357.688
963.572	2516.96	2937.77	2727.37	297.558
964.904	2592.69	2959.22	2775.96	259.176
966.237	2648.67	2989.7	2819.18	241.147
967.57	2683.57	3020.05	2851.81	237.923
968.903	2698.19	3039.32	2868.76	241.214
970.235	2694.89	3043.81	2869.35	246.72
971.568	2678.88	3033.31	2856.1	250.617
972.901	2653.46	3007.34	2830.4	250.235
974.234	2623.76	2968.39	2796.07	243.693
975.566	2594.51	2920.43	2757.47	230.455
976.899	2568.38	2870.72	2719.55	213.787
978.232	2545.39	2824.66	2685.03	197.477
979.565	2522.21	2789.57	2655.89	189.051
980.897	2490.99	2771.95	2631.47	198.67
982.23	2448.96	2776.6	2612.78	231.679
983.563	2396.69	2800.02	2598.36	285.2
984.896	2336.52	2823.43	2579.97	344.299
986.228	2271.24	2832.52	2551.88	396.883
987.561	2206.69	2827.64	2517.17	439.075
988.894	2146.59	2810.04	2478.31	469.128
990.227	2089.1	2783.97	2436.54	491.349
991.559	2034.29	2755.45	2394.87	509.935
992.892	1985.81	2731.95	2358.88	527.604
994.225	1948.21	2719.3	2333.76	545.242
995.558	1927.76	2721.58	2324.67	561.314
996.89	1928.91	2740.19	2334.55	573.662
998.223	1953.2	2772.23	2362.72	579.141
999.556	1996.56	2808.36	2402.46	574.032
1000.89	2052.9	2848.5	2450.7	562.575
1002.22	2115.68	2897	2506.34	552.473
1003.55	2171.9	2959.25	2565.58	556.735
1004.89	2209.99	3042.3	2626.15	588.532
1006.22	2224.14	3149.78	2686.96	654.528
1007.55	2213.96	3276.74	2745.35	751.503
1008.88	2181.4	3408.65	2795.02	867.798
1010.22	2132.15	3534.25	2833.2	991.436
1011.55	2073.43	3644.26	2858.84	1110.75
1012.88	2015.9	3733.06	2874.48	1214.21
1014.22	1971.43	3795.22	2883.32	1289.61
1015.55	1951.42	3827.58	2889.5	1326.65
1016.88	1961.03	3828.53	2894.78	1320.52
1018.21	1998.96	3798.93	2898.95	1272.77
1019.55	2054.85	3738.34	2896.6	1190.41
1020.88	2112.99	3646.18	2879.58	1084.13
1022.21	2166.17	3521.1	2843.64	958.083
1023.55	2210.28	3362.82	2786.55	814.965
1024.88	2242.32	3168.82	2705.57	655.13
1026.21	2262.43	2938.7	2600.56	478.195
1027.54	2272.96	2677.7	2475.33	286.199
1028.88	2277.08	2396.87	2336.98	84.7089
1030.21	2280.04	2115.65	2197.84	116.238
1031.54	2287.32	1856.4	2071.86	304.708
1032.87	2303.85	1645.42	1974.64	465.58
1034.21	2328.69	1512.16	1920.42	577.375
1035.54	2358.72	1483.93	1921.33	618.568
1036.87	2389.54	1558.15	1973.84	587.882
1038.21	2417.18	1713.24	2065.21	497.759
1039.54	2437.43	1898.68	2168.06	380.954
1040.87	2447.1	2097.48	2272.29	247.217
1042.2	2443.06	2301.73	2372.39	99.9411
1043.54	2423.71	2502.42	2463.07	55.6615
1044.87	2388.64	2694.17	2541.41	216.043
1046.2	2338.06	2874.2	2606.13	379.106
1047.53	2274.78	3040.1	2657.44	541.165
1048.87	2204.89	3189.62	2697.26	696.312
1050.2	2136.35	3316.96	2726.66	834.818
1051.53	2076.8	3418.82	2747.81	948.951
1052.87	2034.95	3489.71	2762.33	1028.67
1054.2	2017.41	3523	2770.2	1064.61
1055.53	2022.29	3512.43	2767.36	1053.69
1056.86	2044.19	3453.09	2748.64	996.241
1058.2	2072.41	3341.94	2707.17	897.689
1059.53	2093.74	3181.49	2637.62	769.157
1060.86	2104.15	2978.04	2541.1	617.938
1062.19	2101.66	2744.65	2423.15	454.662
1063.53	2085.48	2500.79	2293.13	293.667
1064.86	2055.93	2270.9	2163.42	152.005
1066.19	2015.21	2080.42	2047.82	46.1078
1067.53	1965.97	1956.37	1961.17	6.78966
1068.86	1911.55	1926.14	1918.84	10.3222
1070.19	1854.87	1956.23	1905.55	71.6719
1071.52	1798.4	2018.63	1908.52	155.725
1072.86	1743.49	2115.84	1929.66	263.285
1074.19	1691.55	2237.9	1964.72	386.324
1075.52	1646.09	2377.38	2011.73	517.099
1076.85	1612.96	2522.12	2067.54	642.875
1078.19	1601.27	2669.15	2135.21	755.108
1079.52	1618.09	2811.85	2214.97	844.113
1080.85	1665.74	2947.8	2306.77	906.557
1082.19	1735.69	3071.69	2403.69	944.693
1083.52	1817.68	3178.33	2498.01	962.125
1084.85	1895.47	3261.44	2578.45	965.891
1086.18	1960.31	3315.64	2637.98	958.364
1087.52	2008.2	3337.37	2672.79	939.864
1088.85	2038.95	3323.01	2680.98	907.966
1090.18	2054.63	3271.55	2663.09	860.49
1091.51	2058.9	3183.39	2621.15	795.139
1092.85	2056.23	3061.54	2558.89	710.862
1094.18	2053.56	2912.78	2483.17	607.561
1095.51	2059.59	2749.19	2404.39	487.618
1096.85	2082.64	2586.35	2334.49	356.181
1098.18	2130.2	2444.77	2287.48	222.435
1099.51	2203.04	2342.82	2272.93	98.8366
1100.84	2293.19	2295.07	2294.13	1.32854
1102.18	2393.92	2310.48	2352.2	59.0013
1103.51	2498.88	2389.68	2444.28	77.2109
1104.84	2599.51	2512.64	2556.07	61.4233
1106.18	2681.93	2639.96	2660.94	29.6773
1107.51	2738.24	2761.41	2749.82	16.3802
1108.84	2764.22	2874.24	2819.23	77.7908
1110.17	2757.99	2977.2	2867.59	155.007
1111.51	2720.76	3069.93	2895.34	246.895
1112.84	2659.35	3151.69	2905.52	348.14
1114.17	2584.3	3225.45	2904.87	453.362
1115.5	2508.69	3293.85	2901.27	555.191
1116.84	2449.39	3354.34	2901.86	639.895
1118.17	2424.83	3397.29	2911.06	687.637
1119.5	2453.52	3413.19	2933.35	678.591
1120.84	2549.89	3396.51	2973.2	598.651
1122.17	2725.15	3343.29	3034.22	437.093
1123.5	2921.39	3253.41	3087.4	234.768
1124.83	3108.44	3130.45	3119.45	15.5637
1126.17	3277.83	2980.12	3128.97	210.518
1127.5	3422.76	2812.09	3117.42	431.813
1128.83	3537.89	2639.13	3088.51	635.519
1130.16	3615.01	2474.13	3044.57	806.726
1131.5	3647.65	2332.34	2990	930.063
1132.83	3631.84	2225.91	2928.88	994.148
1134.16	3565.44	2155.66	2860.55	996.858
1135.5	3449.31	2112.67	2780.99	945.149
1136.83	3289.92	2091.5	2690.71	847.408
1138.16	3098.28	2079.82	2589.05	720.162
1139.49	2891.67	2065.89	2478.78	583.912
1140.83	2689.54	2045.58	2367.56	455.342
1142.16	2513.34	2016.27	2264.81	351.48
1143.49	2380.57	1977.56	2179.07	284.972
1144.82	2309.16	1930.11	2119.63	268.024
1146.16	2273.97	1874.18	2074.07	282.691
1147.49	2246.29	1816.56	2031.42	303.868
1148.82	2234.93	1766.72	2000.82	331.073
1150.16	2237.31	1734.06	1985.68	355.85
1151.49	2257.34	1728.69	1993.02	373.812
1152.82	2292.39	1756.28	2024.34	379.087
1154.15	2333.72	1803.18	2068.45	375.144
1155.49	2376.54	1856.7	2116.62	367.582
1156.82	2418.57	1920.14	2169.35	352.443
1158.15	2459.26	1995.7	2227.48	327.788
1159.48	2496.13	2084.59	2290.36	291.005
1160.82	2525.15	2184.47	2354.81	240.895
1162.15	2539.71	2288.87	2414.29	177.377
1163.48	2534.58	2390.55	2462.57	101.846
1164.82	2505.74	2484.67	2495.2	14.8949
1166.15	2452.94	2563.1	2508.02	77.896
1167.48	2379.34	2619.18	2499.26	169.592
1168.81	2291.53	2648.68	2470.11	252.544
1170.15	2200.95	2651.73	2426.34	318.751
1171.48	2122.01	2629.51	2375.76	358.855
1172.81	2070.18	2589.35	2329.77	367.108
1174.14	2062.7	2542.59	2302.65	339.334
1175.48	2113.73	2503.04	2308.38	275.28
1176.81	2225.18	2489.77	2357.47	187.094
1178.14	2366.89	2519.79	2443.34	108.118
1179.48	2508.11	2601.14	2554.62	65.7811
1180.81	2639.23	2714.08	2676.65	52.9262
1182.14	2753.47	2836.08	2794.77	58.4188
1183.47	2845.33	2959.19	2902.26	80.507
1184.81	2908.53	3077.91	2993.22	119.768
1186.14	2941.15	3186.55	3063.85	173.518
1187.47	2943.27	3279.87	3111.57	238.016
1188.8	2916.68	3354.12	3135.4	309.319
1190.14	2863.42	3406.11	3134.76	383.744
1191.47	2788.15	3431.45	3109.8	454.88
1192.8	2694.82	3429.06	3061.94	519.184
1194.14	2588.17	3397.27	2992.72	572.12
1195.47	2473.37	3333.97	2903.67	608.535
1196.8	2356.34	3236.5	2796.42	622.37
1198.13	2241.23	3104.27	2672.75	610.268
1199.47	2132.18	2939.1	2535.64	570.576
1200.8	2030.49	2751.01	2390.75	509.483
1202.13	1936.48	2551.9	2244.19	435.165
1203.47	1846.55	2357.2	2101.87	361.089
1204.8	1755.86	2188.4	1972.13	305.849
1206.13	1659.93	2069.49	1864.71	289.608
1207.46	1560.79	2019.9	1790.35	324.639
1208.8	1464.33	2050.57	1757.45	414.536
1210.13	1379.31	2088.3	1733.8	501.337
1211.46	1314.45	2117.23	1715.84	567.647
1212.79	1282.96	2130.38	1706.67	599.222
1214.13	1285.73	2128.13	1706.93	595.667
1215.46	1312.69	2107.19	1709.94	561.796
1216.79	1367.07	2067.35	1717.21	495.173
1218.13	1445	2010.94	1727.97	400.181
1219.46	1531.99	1939.15	1735.57	287.907
1220.79	1613.05	1858.44	1735.74	173.522
1222.12	1684.66	1776.44	1730.55	64.9039
1223.46	1744.05	1704.36	1724.2	28.0612
1224.79	1792	1652.61	1722.31	98.5632
1226.12	1829.66	1624.78	1727.22	144.872
1227.45	1858.9	1608.34	1733.62	177.175
1228.79	1879.62	1610.51	1745.07	190.289
1230.12	1895.47	1637.48	1766.47	182.43
1231.45	1909.64	1676.92	1793.28	164.557
1232.79	1926.88	1707.33	1817.1	155.248
1234.12	1949.42	1727.7	1838.56	156.779
1235.45	1977.35	1735.24	1856.29	171.193
1236.78	2002.81	1731.16	1866.99	192.082
1238.12	2020.54	1715.35	1867.95	215.802
1239.45	2026.31	1688.32	1857.32	238.993
1240.78	2020.14	1648.34	1834.24	262.903
1242.11	2005.75	1593.5	1799.62	291.501
1243.45	1992.96	1517.01	1754.98	336.554
1244.78	1995.36	1417.7	1706.53	408.466
1246.11	2029.81	1301.5	1665.65	514.994
1247.45	2113.29	1179.59	1646.44	660.223
1248.78	2258.3	1067.53	1662.92	841.998
1250.11	2463.24	983.725	1723.48	1046.18
1251.44	2684.51	944.441	1814.48	1230.42
1252.78	2904.12	962.329	1933.23	1373.06
1254.11	3114.39	1041.83	2078.11	1465.52
1255.44	3311.89	1153.1	2232.5	1526.49
1256.77	3491.24	1288.94	2390.09	1557.26
1258.11	3646.87	1455.15	2551.01	1549.78
1259.44	3775.88	1656.89	2716.39	1498.35
1260.77	3875.66	1899.35	2887.51	1397.46
1262.11	3941.33	2176.84	3059.08	1247.68
1263.44	3971.52	2449.75	3210.64	1076.05
1264.77	3967.29	2704.73	3336.01	892.765
1266.1	3929.96	2935.07	3432.51	703.492
1267.44	3862.03	3133.89	3497.96	514.873
1268.77	3764.44	3291.65	3528.04	334.313
1270.1	3636.78	3400.81	3518.79	166.861
1271.43	3482.1	3459.05	3470.57	16.2977
1272.77	3304.26	3465.32	3384.79	113.884
1274.1	3111.78	3420.67	3266.23	218.42
1275.43	2910.75	3328.95	3119.85	295.709
1276.77	2712.58	3195.81	2954.2	341.693
1278.1	2524.12	3030.52	2777.32	358.079
1279.43	2348.47	2849.56	2599.01	354.322
1280.76	2185.01	2672.31	2428.66	344.57
1282.1	2037.24	2522.2	2279.72	342.918
1283.43	1908.26	2426.36	2167.31	366.349
1284.76	1796.04	2408.49	2102.26	433.071
1286.1	1704.6	2480.17	2092.38	548.415
1287.43	1645.09	2560.06	2102.58	646.987
1288.76	1626.48	2629.03	2127.75	708.915
1290.09	1654.3	2684.1	2169.2	728.179
1291.43	1700.81	2722.52	2211.67	722.458
1292.76	1757.85	2741.15	2249.5	695.298
1294.09	1815.26	2738.03	2276.65	652.497
1295.42	1859.23	2712.41	2285.82	603.29
1296.76	1887.39	2668.55	2277.97	552.359
1298.09	1898.3	2611.45	2254.87	504.273
1299.42	1895.64	2550.73	2223.18	463.217
1300.76	1883.68	2493.81	2188.74	431.433
1302.09	1871.79	2445.78	2158.78	405.868
1303.42	1871.25	2404.82	2138.04	377.286
1304.75	1895.55	2366.46	2131.01	332.98
1306.09	1956.69	2325.8	2141.25	261.005
1307.42	2048.78	2281.67	2165.22	164.683
1308.75	2137.16	2231.82	2184.49	66.9388
1310.08	2216	2175.92	2195.96	28.3379
1311.42	2279.91	2116.43	2198.17	115.597
1312.75	2329.43	2056.68	2193.06	192.866
1314.08	2363.98	1995.39	2179.68	260.635
1315.42	2382.31	1935.02	2158.67	316.281
1316.75	2385.21	1880.51	2132.86	356.877
1318.08	2375.83	1836.89	2106.36	381.091
1319.41	2355.18	1808.65	2081.91	386.458
1320.75	2326.86	1799.52	2063.19	372.884
1322.08	2293.07	1809.7	2051.39	341.791
1323.41	2255.44	1832.52	2043.98	299.051
1324.74	2215.16	1868.19	2041.67	245.342
1326.08	2171.41	1918.76	2045.09	178.647
1327.41	2123.86	1983.8	2053.83	99.037
1328.74	2068.42	2060.1	2064.26	5.8784
1330.08	2002.65	2145.91	2074.28	101.303
1331.41	1922.81	2240.21	2081.51	224.437
1332.74	1830.86	2342.92	2086.89	362.083
1334.07	1733.53	2457.1	2095.32	511.638
1335.41	1641.39	2587.3	2114.35	668.857
1336.74	1567.75	2734.52	2151.14	825.032
1338.07	1528.32	2901.98	2215.15	971.33
1339.4	1535.08	3090.44	2312.76	1099.81
1340.74	1597.18	3297.82	2447.5	1202.53
1342.07	1696.57	3515.93	2606.25	1286.48
1343.4	1787.75	3735.07	2761.41	1376.96
1344.74	1863.93	3946.29	2905.11	1472.45
1346.07	1921.15	4139.52	3030.33	1568.62
1347.4	1961.01	4306.34	3133.67	1658.4
1348.73	1982.59	4442.75	3212.67	1739.6
1350.07	1986.88	4543.78	3265.33	1808
1351.4	1977.9	4602.84	3290.37	1856.11
1352.73	1958.47	4612.72	3285.6	1876.84
1354.06	1930.74	4571.45	3251.09	1867.26
1355.4	1894.99	4475.91	3185.45	1824.98
1356.73	1848.7	4325.58	3087.14	1751.42
1358.06	1787.42	4123.79	2955.61	1652.07
1359.4	1710.89	3879.98	2795.43	1533.78
1360.73	1623.16	3607.49	2615.32	1403.14
1362.06	1535.32	3327.89	2431.6	1267.53
1363.39	1463.52	3065.23	2264.38	1132.58
1364.73	1428.93	2843.85	2136.39	1000.5
1366.06	1455.47	2692.49	2073.98	874.706
1367.39	1563.37	2633.87	2098.62	756.956
1368.73	1753.72	2682.99	2218.35	657.095
1370.06	1965.21	2837.53	2401.37	616.826
1371.39	2183.62	3022.31	2602.96	593.045
1372.72	2405.37	3213.25	2809.31	571.258
1374.06	2625.52	3405.32	3015.42	551.398
1375.39	2836.56	3586.25	3211.41	530.106
1376.72	3033.17	3750.39	3391.78	507.146
1378.05	3209.85	3891.57	3550.71	482.049
1379.39	3359.85	4007.8	3683.83	458.171
1380.72	3476.56	4093.1	3784.83	435.96
1382.05	3557.15	4144.51	3850.83	415.328
1383.39	3599.57	4157.95	3878.76	394.839
1384.72	3601.02	4131.56	3866.29	375.151
1386.05	3560.4	4064.45	3812.43	356.42
1387.38	3478.8	3956.86	3717.83	338.038
1388.72	3354.97	3809.63	3582.3	321.493
1390.05	3192.97	3628.34	3410.65	307.85
1391.38	3000.1	3421	3210.55	297.62
1392.71	2786.77	3195.71	2991.24	289.167
1394.05	2567.98	2964.32	2766.15	280.257
1395.38	2364.13	2741.28	2552.71	266.689
1396.71	2192.26	2539.67	2365.96	245.652
1398.05	2070.25	2369.02	2219.64	211.262
1399.38	2013.87	2237.34	2125.61	158.017
1400.71	2002.9	2145.85	2074.38	101.076
1402.04	2018.28	2091.08	2054.68	51.4731
1403.38	2059.32	2062.29	2060.8	2.09809
1404.71	2114.6	2045.31	2079.95	48.9959
1406.04	2171.27	2027.39	2099.33	101.739
1407.37	2220.92	2005.3	2113.11	152.469
1408.71	2259.12	1980.21	2119.67	197.219
1410.04	2285.58	1954.79	2120.19	233.91
1411.37	2303.35	1933.7	2118.53	261.377
1412.71	2316.99	1924.37	2120.68	277.629
1414.04	2329.89	1929.21	2129.55	283.326
1415.37	2348.96	1945.84	2147.4	285.051
1416.7	2379.35	1969.76	2174.55	289.623
1418.04	2424.54	1999.21	2211.88	300.753
1419.37	2485.98	2026.78	2256.38	324.7
1420.7	2559.3	2046.71	2303	362.455
1422.03	2636.75	2052.6	2344.67	413.061
1423.37	2714.31	2041.69	2378	475.607
1424.7	2790.59	2013.57	2402.08	549.438
1426.03	2864.68	1973.15	2418.92	630.406
1427.37	2937	1925.32	2431.16	715.365
1428.7	3006.41	1876.89	2441.65	798.69
1430.03	3072.13	1835.65	2453.89	874.323
1431.36	3130.83	1806.96	2468.89	936.116
1432.7	3172.99	1792.67	2482.83	976.034
1434.03	3186.38	1795.05	2490.71	983.824
1435.36	3164.53	1813.3	2488.91	955.468
1436.69	3103.13	1840.29	2471.71	892.965
1438.03	2999.56	1866.89	2433.23	800.922
1439.36	2855.8	1893.73	2374.76	680.289
1440.69	2674.41	1927.54	2300.98	528.121
1442.03	2464.57	1975.79	2220.18	345.621
1443.36	2240.97	2047.95	2144.46	136.488
1444.69	2023.42	2149.43	2086.42	89.0985
1446.02	1834.44	2284.01	2059.22	317.896
1447.36	1702.26	2438.75	2070.5	520.774
1448.69	1651.33	2585.68	2118.51	660.687
1450.02	1691.68	2714.97	2203.33	723.573
1451.35	1774.55	2823.66	2299.11	741.83
1452.69	1890.38	2905.81	2398.1	718.019
1454.02	2035.32	2958.79	2497.06	652.99
1455.35	2180.41	2980.77	2580.59	565.939
1456.69	2310.92	2972.34	2641.63	467.691
1458.02	2418.5	2934.62	2676.56	364.95
1459.35	2498.67	2871.95	2685.31	263.947
1460.68	2550.56	2788.58	2669.57	168.309
1462.02	2573.5	2690.59	2632.05	82.7954
1463.35	2567.78	2586.28	2577.03	13.0858
1464.68	2538.24	2486.2	2512.22	36.7984
1466.02	2489.52	2394.91	2442.22	66.8979
1467.35	2428.13	2315.44	2371.78	79.6799
1468.68	2361.27	2251.61	2306.44	77.545
1470.01	2297.13	2209.06	2253.1	62.2785
1471.35	2243.45	2190.74	2217.09	37.2702
1472.68	2207.19	2190.01	2198.6	12.149
1474.01	2184.32	2191.64	2187.98	5.17186
1475.34	2148.94	2189.26	2169.1	28.5136
1476.68	2093.95	2180.83	2137.39	61.4307
1478.01	2019.46	2159.72	2089.59	99.1793
1479.34	1926.92	2124.01	2025.46	139.361
1480.68	1822.74	2074.35	1948.54	177.912
1482.01	1718.62	2016.67	1867.65	210.75
1483.34	1631.69	1958.46	1795.07	231.067
1484.67	1582.94	1913.72	1748.33	233.897
1486.01	1594.04	1894.35	1744.2	212.353
1487.34	1684.33	1912.24	1798.29	161.157
1488.67	1865.47	1974.77	1920.12	77.2872
1490	2063.43	2088.47	2075.95	17.7054
1491.34	2254.85	2252.02	2253.43	1.99985
1492.67	2429.26	2451.17	2440.21	15.4926
1494	2586.23	2657.74	2621.98	50.5663
1495.34	2722.53	2862	2792.27	98.6225
1496.67	2837.06	3057.28	2947.17	155.714
1498	2926.67	3235.94	3081.31	218.689
1499.33	2991.48	3392.62	3192.05	283.651
1500.67	3030.93	3524.49	3277.71	349
1502	3045.3	3626.01	3335.65	410.623
1503.33	3035.06	3692.39	3363.72	464.804
1504.66	3004.45	3720.85	3362.65	506.574
1506	2958.15	3709.55	3333.85	531.322
1507.33	2905.2	3656.66	3280.93	531.364
1508.66	2856.53	3564.53	3210.53	500.625
1510	2825.94	3436.98	3131.46	432.069
1511.33	2828.95	3279.78	3054.37	318.787
1512.66	2878.82	3104.07	2991.45	159.274
1513.99	2983.12	2922.51	2952.81	42.859
1515.33	3125.38	2747.86	2936.62	266.952
1516.66	3269.31	2593.25	2931.28	478.047
1517.99	3410.15	2473.46	2941.81	662.336
1519.32	3546.31	2393.62	2969.97	815.077
1520.66	3674.37	2347.05	3010.71	938.556
1521.99	3792.07	2316.54	3054.3	1043.35
1523.32	3897.85	2291.46	3094.66	1135.89
1524.66	3989.6	2269.92	3129.76	1216
1525.99	4063.8	2249.23	3156.52	1283.1
1527.32	4117.83	2227.75	3172.79	1336.49
1528.65	4148.43	2206.62	3177.52	1373.07
1529.99	4152.35	2187.27	3169.81	1389.52
1531.32	4127.01	2169.53	3148.27	1384.15
1532.65	4071.81	2155	3113.4	1355.39
1533.98	3986.29	2145.54	3065.91	1301.61
1535.32	3874.39	2142.86	3008.63	1224.37
1536.65	3742.25	2149.09	2945.67	1126.54
1537.98	3596.19	2158.86	2877.53	1016.35
1539.32	3443.62	2170.95	2807.28	899.917
1540.65	3293.66	2192.15	2742.91	778.89
1541.98	3149.58	2231.75	2690.66	649.008
1543.31	3008.49	2298.87	2653.68	501.781
1544.65	2872.95	2393.96	2633.46	338.695
1545.98	2751.71	2516.36	2634.03	166.416
1547.31	2651.92	2664.31	2658.12	8.76424
1548.65	2582.88	2832.64	2707.76	176.604
1549.98	2552.38	3014.17	2783.27	326.532
1551.31	2563.22	3197.98	2880.6	448.844
1552.64	2601.17	3374.35	2987.76	546.727
1553.98	2650.52	3537.12	3093.82	626.919
1555.31	2706.49	3681.8	3194.15	689.651
1556.64	2767.29	3802.23	3284.76	731.813
1557.97	2833	3892.71	3362.85	749.327
1559.31	2901.7	3950.68	3426.19	741.742
1560.64	2969.06	3971.66	3470.36	708.949
1561.97	3029.12	3953.48	3491.3	653.623
1563.31	3072.48	3896.37	3484.42	582.576
1564.64	3090.61	3803.54	3447.08	504.115
1565.97	3077.78	3678.99	3378.38	425.124
1567.3	3030.87	3533.31	3282.09	355.282
1568.64	2947.94	3378.68	3163.31	304.579
1569.97	2829.03	3229.86	3029.44	283.43
1571.3	2679.7	3108.75	2894.22	303.386
1572.63	2505.17	3036.86	2771.02	375.96
1573.97	2316.72	3030.19	2673.45	504.495
1575.3	2125.6	3102.62	2614.11	690.863
1576.63	1946.22	3220.07	2583.14	900.743
1577.97	1797.08	3331.05	2564.06	1084.68
1579.3	1701.41	3433.59	2567.5	1224.84
1580.63	1683.63	3519.43	2601.53	1298.11
1581.96	1764.27	3583.12	2673.7	1286.12
1583.3	1956.99	3616.68	2786.84	1173.58
1584.63	2219.4	3614.11	2916.76	986.209
1585.96	2491	3568.98	3029.99	762.25
1587.29	2771.71	3481.12	3126.41	501.629
1588.63	3051.01	3350.36	3200.69	211.668
1589.96	3323	3182.34	3252.67	99.4633
1591.29	3578.42	2985.56	3281.99	419.217
1592.63	3817.08	2773.93	3295.51	737.619
1593.96	4031.06	2564.85	3297.96	1036.77
1595.29	4219.21	2377.19	3298.2	1302.5
1596.62	4382.68	2228.42	3305.55	1523.3
1597.96	4523.11	2133.24	3328.18	1689.89
1599.29	4639.99	2097.29	3368.64	1797.96
1600.62	4736.69	2076.01	3406.35	1881.39
1601.95	4816.17	2060.45	3438.31	1948.59
1603.29	4880.76	2047.44	3464.1	2003.46
1604.62	4930.91	2036.06	3483.48	2046.97
1605.95	4963.17	2018.57	3490.87	2082.15
1607.29	4972.93	1990.93	3481.93	2108.59
1608.62	4954.04	1950.27	3452.16	2123.98
1609.95	4905.74	1899.95	3402.84	2125.41
1611.28	4825.71	1846.03	3335.87	2106.95
1612.62	4714.02	1798.77	3256.4	2061.4
1613.95	4571.9	1769.7	3170.8	1981.45
1615.28	4399.45	1773.97	3086.71	1856.5
1616.61	4198.1	1821.37	3009.73	1680.6
1617.95	3970.94	1907.37	2939.15	1459.17
1619.28	3724.67	2026.73	2875.7	1200.62
1620.61	3467.09	2171.22	2819.15	916.314
1621.95	3211.5	2315.65	2763.57	633.462
1623.28	2975.56	2455.37	2715.46	367.834
1624.61	2780.3	2585.23	2682.76	137.929
1625.94	2642.61	2702.29	2672.45	42.2022
1627.28	2574.59	2801.09	2687.84	160.161
1628.61	2572.03	2878.17	2725.1	216.473
1629.94	2602.16	2927.22	2764.69	229.85
1631.27	2638.75	2946.36	2792.55	217.514
1632.61	2675.35	2933.3	2804.33	182.398
1633.94	2707.67	2887.94	2797.81	127.473
1635.27	2734.19	2808.73	2771.46	52.7121
1636.61	2754.34	2698.99	2726.66	39.1383
1637.94	2766.74	2562.59	2664.67	144.356
1639.27	2768.36	2406.1	2587.23	256.153
1640.6	2759.68	2238.55	2499.12	368.499
1641.94	2739.51	2070.35	2404.93	473.164
1643.27	2708.72	1913.27	2310.99	562.467
1644.6	2666.45	1787.44	2226.95	621.553
1645.94	2614.2	1710.87	2162.54	638.749
1647.27	2554.11	1695.05	2124.58	607.448
1648.6	2491	1734.29	2112.65	535.071
1649.93	2427.36	1777.29	2102.33	459.666
1651.27	2367.31	1820.06	2093.69	386.97
1652.6	2316.67	1861.89	2089.28	321.571
1653.93	2280.08	1903.53	2091.8	266.259
1655.26	2263.15	1940.15	2101.65	228.396
1656.6	2269.02	1973.52	2121.27	208.955
1657.93	2301.03	2001.27	2151.15	211.965
1659.26	2352.78	2024.79	2188.78	231.923
1660.6	2414.45	2041.93	2228.19	263.411
1661.93	2477.82	2052.98	2265.4	300.408
1663.26	2538.97	2055.59	2297.28	341.803
1664.59	2593.65	2047.29	2320.47	386.332
1665.93	2642.18	2027.44	2334.81	434.688
1667.26	2680.69	1999.7	2340.19	481.532
1668.59	2705.86	1972.92	2339.39	518.27
1669.92	2714.71	1956.68	2335.69	536.008
1671.26	2703.92	1962.04	2332.98	524.585
1672.59	2670.43	1996.02	2333.22	476.879
1673.92	2617.73	2066.45	2342.09	389.817
1675.26	2549.71	2162.51	2356.11	273.785
1676.59	2476.72	2253.7	2365.21	157.696
1677.92	2414.28	2334.78	2374.53	56.219
1679.25	2382.11	2399.47	2390.79	12.2767
1680.59	2402.52	2443.4	2422.96	28.9014
1681.92	2500.67	2462.9	2481.79	26.7061
1683.25	2700.11	2454.36	2577.23	173.77
1684.58	2988.8	2416.21	2702.51	404.882
1685.92	3289.34	2351.79	2820.57	662.952
1687.25	3588.86	2265.21	2927.03	935.961
1688.58	3883.19	2163.92	3023.56	1215.71
1689.92	4168.22	2056.79	3112.5	1493.01
1691.25	4438.02	1954.81	3196.42	1755.89
1692.58	4686.98	1871.55	3279.26	1990.81
1693.91	4912.39	1822.23	3367.31	2185.07
1695.25	5112.92	1815.23	3464.07	2331.82
1696.58	5285.82	1849.4	3567.61	2429.92
1697.91	5428.88	1906.5	3667.69	2490.7
1699.24	5542.16	1956.79	3749.48	2535.24
1700.58	5625.05	1992.82	3808.94	2568.37
1701.91	5676.87	2014.28	3845.58	2589.84
1703.24	5697.97	2018.28	3858.12	2601.94
1704.58	5690.68	2007.8	3849.24	2604.19
1705.91	5654.71	1986.15	3820.43	2594.06
1707.24	5589.51	1957.52	3773.52	2568.2
1708.57	5495	1923.71	3709.36	2525.28
1709.91	5372.73	1891.17	3631.95	2461.83
1711.24	5223.09	1867.12	3545.1	2373.03
1712.57	5050.89	1859.2	3455.05	2256.86
1713.9	4856.97	1869.06	3363.01	2112.77
1715.24	4643.78	1896.48	3270.13	1942.64
1716.57	4415.69	1931.05	3173.37	1756.91
1717.9	4179.06	1963.09	3071.08	1566.93
1719.24	3939.36	1989.6	2964.48	1378.69
1720.57	3703.79	2011.6	2857.7	1196.57
1721.9	3480.3	2026.5	2753.4	1027.99
1723.23	3271.64	2030.94	2651.29	877.304
1724.57	3086.61	2025.64	2556.12	750.219
1725.9	2938.57	2009.85	2474.21	656.706
1727.23	2839.57	1986.42	2413	603.272
1728.57	2800.26	1955.86	2378.06	597.076
1729.9	2829.44	1925.88	2377.66	638.918
1731.23	2934.11	1900.1	2417.1	731.162
1732.56	3094.36	1888.75	2491.56	852.498
1733.9	3273.52	1902.33	2587.93	969.573
1735.23	3451.54	1946.2	2698.87	1064.43
1736.56	3615.83	2015.8	2815.81	1131.39
1737.89	3762.41	2083.35	2922.88	1187.27
1739.23	3886.23	2143.1	3014.66	1232.58
1740.56	3984.84	2192.59	3088.72	1267.32
1741.89	4054.03	2227.71	3140.87	1291.41
1743.23	4091.71	2243.98	3167.84	1306.54
1744.56	4094.93	2238.92	3166.92	1312.4
1745.89	4060.9	2212.53	3136.71	1306.99
1747.22	3989.82	2162.14	3075.98	1292.37
1748.56	3884.24	2091.43	2987.84	1267.71
1749.89	3748.41	2008.9	2878.66	1230.02
1751.22	3589.08	1929.03	2759.05	1173.83
1752.55	3418.01	1870.67	2644.34	1094.14
1753.89	3250.62	1854.16	2552.39	987.447
1755.22	3106.82	1900.35	2503.59	853.103
1756.55	3005.87	2021.83	2513.85	695.821
1757.89	2962.37	2217.61	2589.99	526.622
1759.22	2982.99	2482.98	2732.99	353.565
1760.55	3009.33	2777.22	2893.27	164.126
1761.88	3030.56	3078.91	3054.74	34.1903
1763.22	3041.93	3381.55	3211.74	240.149
1764.55	3046.48	3681.94	3364.21	449.334
1765.88	3042.83	3972.09	3507.46	657.09
1767.21	3034.92	4244.45	3639.69	855.265
1768.55	3023.79	4495.87	3759.83	1040.91
1769.88	3010.98	4722.79	3866.89	1210.43
1771.21	2993.06	4920.07	3956.57	1362.6
1772.55	2965.17	5085.5	4025.34	1499.3
1773.88	2924.97	5218.92	4071.94	1622.07
1775.21	2871.38	5318.71	4095.05	1730.52
1776.54	2806.75	5384.25	4095.5	1822.57
1777.88	2733.73	5415.18	4074.46	1896.07
1779.21	2657.05	5413.18	4035.12	1948.88
1780.54	2578.62	5379.43	3979.03	1980.47
1781.87	2503.7	5316.23	3909.97	1988.76
1783.21	2435.07	5223.76	3829.41	1971.91
1784.54	2379.15	5104.67	3741.91	1927.23
1785.87	2343.74	4956.63	3650.18	1847.59
1787.21	2336.15	4773.97	3555.06	1723.79
1788.54	2360.23	4553.89	3457.06	1551.15
1789.87	2421.31	4301.34	3361.32	1329.38
1791.2	2522.61	4027.76	3275.19	1064.3
1792.54	2660.75	3749.93	3205.34	770.167
1793.87	2806.59	3490.76	3148.67	483.788
1795.2	2936.97	3278.87	3107.92	241.766
1796.53	3046.47	3147.58	3097.03	71.4943
1797.87	3127.35	3122.97	3125.16	3.09813
1799.2	3173.1	3226.98	3200.04	38.0937
1800.53	3176.97	3430.32	3303.65	179.15
1801.87	3135.61	3653.86	3394.74	366.463
1803.2	3048.18	3886.24	3467.21	592.598
1804.53	2919.48	4123.31	3521.39	851.238
1805.86	2760.67	4353.47	3557.07	1126.28
1807.2	2588.34	4570.64	3579.49	1401.7
1808.53	2426.26	4768.82	3597.54	1656.45
1809.86	2303.01	4941.12	3622.06	1865.42
1811.2	2245.34	5084.62	3664.98	2007.67
1812.53	2280.48	5198.76	3739.62	2063.53
1813.86	2425.07	5284.87	3854.97	2022.18
1815.19	2617.52	5345.12	3981.32	1928.7
1816.53	2845.68	5379.58	4112.63	1791.73
1817.86	3099.67	5390.83	4245.25	1620.09
1819.19	3372.04	5379.77	4375.91	1419.68
1820.52	3657.27	5347.73	4502.5	1195.34
1821.86	3951.45	5296.18	4623.82	950.868
1823.19	4246.98	5227.28	4737.13	693.177
1824.52	4536.29	5141.4	4838.85	427.877
1825.86	4816.04	5033.75	4924.9	153.945
1827.19	5081.1	4893.51	4987.31	132.646
1828.52	5327.4	4719.14	5023.27	430.103
1829.85	5552.61	4516.62	5034.62	732.55
1831.19	5757.6	4293.63	5025.61	1035.18
1832.52	5942.38	4057.55	4999.96	1332.77
1833.85	6106.78	3811.77	4959.28	1622.81
1835.18	6251.93	3556.98	4904.46	1905.62
1836.52	6379.07	3295.65	4837.36	2180.31
1837.85	6486.98	3032.27	4759.62	2442.85
1839.18	6574.79	2778.88	4676.83	2684.11
1840.52	6640.74	2550.97	4595.85	2891.9
1841.85	6683.57	2361.83	4522.7	3055.93
1843.18	6700.6	2225.32	4462.96	3164.5
1844.51	6689.49	2151.79	4420.64	3208.64
1845.85	6647.93	2122.01	4384.97	3200.31
1847.18	6571.93	2097	4334.46	3164.25
1848.51	6457.69	2075.36	4266.53	3098.78
1849.84	6301.46	2058.77	4180.12	3000.04
1851.18	6101.86	2050.5	4076.18	2864.74
1852.51	5860.09	2047.58	3953.83	2695.85
1853.84	5577.8	2046.37	3812.09	2497.1
1855.18	5258.5	2041.72	3650.11	2274.6
1856.51	4908.93	2031.32	3470.13	2034.78
1857.84	4541.2	2012.33	3276.77	1788.18
1859.17	4171.3	1983.75	3077.53	1546.83
1860.51	3815.48	1942.66	2879.07	1324.28
1861.84	3495.33	1899.55	2697.44	1128.39
1863.17	3233	1870.14	2551.57	963.687
1864.5	3045.62	1873.13	2459.37	829.077
1865.84	2926.62	1924.88	2425.75	708.335
1867.17	2855.95	2038.93	2447.44	577.726
1868.5	2827.37	2205.39	2516.38	439.806
1869.84	2834.21	2370.37	2602.29	327.981
1871.17	2860.01	2520.8	2690.41	239.856
1872.5	2885.5	2652.97	2769.24	164.426
1873.83	2897.53	2756.46	2826.99	99.7515
1875.17	2886.62	2825.72	2856.17	43.0602
1876.5	2842.9	2859.03	2850.96	11.4067
1877.83	2760.15	2848.76	2804.45	62.6624
1879.16	2636.42	2792.66	2714.54	110.48
1880.5	2475.89	2692.48	2584.19	153.148
1881.83	2289.25	2556.51	2422.88	188.986
1883.16	2096.95	2396.5	2246.73	211.814
1884.5	1924.61	2227.31	2075.96	214.041
1885.83	1801.63	2066.49	1934.06	187.281
1887.16	1759.34	1940.32	1849.83	127.976
1888.49	1822.37	1878.12	1850.25	39.4202
1889.83	1995.62	1904.51	1950.06	64.426
1891.16	2193.67	2036.68	2115.17	111.006
1892.49	2394.71	2292.69	2343.7	72.1392
1893.82	2590.05	2624.48	2607.27	24.3458
1895.16	2775.22	2991.8	2883.51	153.147
1896.49	2940.77	3381.92	3161.34	311.943
1897.82	3082.98	3781.96	3432.47	494.258
1899.16	3200.99	4184.06	3692.52	695.131
1900.49	3294.47	4587.4	3940.93	914.239
1901.82	3363.59	4988.58	4176.09	1149.04
1903.15	3415.34	5381.07	4398.2	1389.98
1904.49	3456.23	5760.7	4608.47	1629.5
1905.82	3494.4	6127.42	4810.91	1861.82
1907.15	3540.14	6476.05	5008.1	2076.01
1908.49	3597.85	6801.74	5199.79	2265.49
1909.82	3670.49	7101.89	5386.19	2426.36
1911.15	3753.85	7374.36	5564.1	2560.09
1912.48	3845.44	7617.15	5731.3	2667.01
1913.82	3942.72	7826.85	5884.79	2746.49
1915.15	4041.64	8003.48	6022.56	2801.44
1916.48	4137.41	8143.37	6140.39	2832.64
1917.81	4221.07	8244.39	6232.73	2844.92
1919.15	4286.63	8304.34	6295.49	2840.94
1920.48	4325.2	8323.2	6324.2	2827.02
1921.81	4330.75	8299	6314.88	2805.98
1923.15	4297.15	8233.3	6265.22	2783.28
1924.48	4220.09	8125.78	6172.94	2761.74
1925.81	4096.14	7979.29	6037.72	2745.8
1927.14	3926.09	7796.94	5861.51	2737.1
1928.48	3713.41	7584.98	5649.2	2737.61
1929.81	3468.62	7347.48	5408.05	2742.76
1931.14	3207.99	7091.25	5149.62	2745.88
1932.47	2950.5	6822.47	4886.49	2737.89
1933.81	2714.84	6543.01	4628.92	2706.92
1935.14	2520.64	6249.83	4385.24	2636.94
1936.47	2383.68	5936.92	4160.3	2512.52
1937.81	2295.99	5599.25	3947.62	2335.76
1939.14	2215.87	5232.27	3724.07	2132.92
1940.47	2136.45	4836.64	3486.54	1909.32
1941.8	2068.92	4418.88	3243.9	1661.67
1943.14	2022.63	3986.22	3004.43	1388.47
1944.47	2013.24	3547.89	2780.56	1085.16
1945.8	2054.31	3115.97	2585.14	750.703
1947.13	2157.49	2706	2431.74	387.854
1948.47	2285.38	2333.52	2309.45	34.0388
1949.8	2408.55	2011.65	2210.1	280.653
1951.13	2521.42	1752.45	2136.93	543.746
1952.47	2616.17	1565.63	2090.9	742.844
1953.8	2688.92	1436.4	2062.66	885.665
1955.13	2730.55	1357.03	2043.79	971.223
1956.46	2736.66	1329.26	2032.96	995.183
1957.8	2706.2	1353.81	2030.01	956.284
1959.13	2643.66	1394.51	2019.09	883.285
1960.46	2558.53	1430.95	1994.74	797.321
1961.79	2466.1	1470.65	1968.38	703.893
1963.13	2387.32	1526.81	1957.06	608.472
1964.46	2344.77	1615.98	1980.38	515.331
1965.79	2361.83	1754.32	2058.07	429.57
1967.13	2455.68	1958.64	2207.16	351.46
1968.46	2618.67	2218.47	2418.57	282.986
1969.79	2780.55	2511.59	2646.07	190.182
1971.12	2933.72	2804.11	2868.92	91.647
1972.46	3071.74	3087.17	3079.46	10.9137
1973.79	3187.34	3353.65	3270.5	117.597
1975.12	3272.64	3597.14	3434.89	229.456
1976.45	3321.67	3808.48	3565.08	344.23
1977.79	3330.19	3984.38	3657.29	462.588
1979.12	3292.16	4121.92	3707.04	586.728
1980.45	3205.61	4216.69	3711.15	714.937
1981.79	3074.21	4265.72	3669.96	842.524
1983.12	2905.8	4270.02	3587.91	964.646
1984.45	2712.14	4235.78	3473.96	1077.38
1985.78	2512.14	4168.73	3340.44	1171.39
1987.12	2323.25	4080.9	3202.08	1242.85
1988.45	2164.17	3983.1	3073.63	1286.18
1989.78	2053.01	3886.2	2969.6	1296.26
1991.12	2001.64	3796.71	2899.17	1269.31
1992.45	1980.61	3714.88	2847.74	1226.32
1993.78	1970.89	3641.33	2806.11	1181.18
1995.11	1965.18	3573.7	2769.44	1137.4
1996.45	1961.24	3506.83	2734.03	1092.89
1997.78	1959.14	3434.46	2696.8	1043.21
1999.11	1959.27	3351.51	2655.39	984.461
2000.44	1960.29	3258.84	2609.56	918.211
2001.78	1964.37	3161.55	2562.96	846.534
2003.11	1972.29	3063.92	2518.11	771.899
2004.44	1983.68	2970.59	2477.14	697.849
2005.78	1997.38	2891.78	2444.58	632.434
2007.11	2012.81	2830.93	2421.87	578.498
2008.44	2031.25	2794.08	2412.67	539.406
2009.77	2053.95	2788.06	2421.01	519.098
2011.11	2081.85	2813.79	2447.82	517.557
2012.44	2113.05	2874.99	2494.02	538.768
2013.77	2137.55	2971.37	2554.46	589.601
2015.1	2148.86	3090.25	2619.55	665.662
2016.44	2144.15	3220.41	2682.28	761.029
2017.77	2125.46	3354.52	2739.99	869.075
2019.1	2097.35	3484.49	2790.92	980.858
2020.44	2067.09	3602.14	2834.62	1085.45
2021.77	2039.85	3702.69	2871.27	1175.8
2023.1	2022.97	3779.08	2901.02	1241.76
2024.43	2018.7	3823.36	2921.03	1276.09
2025.77	2022.52	3828.15	2925.34	1276.78
2027.1	2034.68	3788.86	2911.77	1240.39
2028.43	2056.09	3701.61	2878.85	1163.56
2029.76	2088.33	3566.13	2827.23	1044.96
2031.1	2133.13	3388.73	2760.93	887.842
2032.43	2199.74	3180.82	2690.28	693.724
2033.76	2298.35	2960.67	2629.51	468.329
2035.1	2442.02	2755.86	2598.94	221.921
2036.43	2641.42	2595.17	2618.3	32.7004
2037.76	2897.47	2507.31	2702.39	275.878
2039.09	3187.48	2521.04	2854.26	471.247
2040.43	3498.11	2657.14	3077.62	594.66
2041.76	3822.88	2844.83	3333.86	691.584
2043.09	4154.68	3042.86	3598.77	786.171
2044.42	4484.46	3248.01	3866.24	874.298
2045.76	4809.01	3450.22	4129.62	960.805
2047.09	5119.43	3645.3	4382.37	1042.37
2048.42	5408.43	3832.39	4620.41	1114.43
2049.76	5670.69	4007.67	4839.18	1175.93
2051.09	5902.39	4174.21	5038.3	1222.01
2052.42	6096.74	4334.35	5215.55	1246.2
2053.75	6249.31	4490.51	5369.91	1243.66
2055.09	6357.53	4644.79	5501.16	1211.09
2056.42	6415.81	4802.73	5609.27	1140.61
2057.75	6417.94	4962.99	5690.47	1028.81
2059.08	6360.29	5118.5	5739.39	878.082
2060.42	6237.96	5260.93	5749.44	690.861
2061.75	6049.83	5388.54	5719.19	467.606
2063.08	5798.07	5497.53	5647.8	212.51
2064.42	5484.34	5583.44	5533.89	70.0783
2065.75	5114.51	5645.41	5379.96	375.406
2067.08	4699.98	5679.91	5189.95	692.915
2068.41	4255.7	5684.52	4970.11	1010.32
2069.75	3797.97	5657.37	4727.67	1314.79
2071.08	3352.35	5598.44	4475.39	1588.23
2072.41	2950.92	5507.15	4229.03	1807.53
2073.75	2624.18	5385.58	4004.88	1952.6
2075.08	2391.15	5240.37	3815.76	2014.7
2076.41	2265.34	5079.8	3672.57	1990.12
2077.74	2243.6	4915.14	3579.37	1889.07
2079.08	2310.83	4761.18	3536.01	1732.66
2080.41	2398.14	4629.38	3513.76	1577.72
2081.74	2482.26	4529.56	3505.91	1447.65
2083.07	2553.83	4467.67	3510.75	1353.29
2084.41	2611.57	4410.98	3511.27	1272.37
2085.74	2652.35	4343.98	3498.16	1196.17
2087.07	2671.14	4259.33	3465.23	1123.03
2088.41	2668	4150.61	3409.3	1048.36
2089.74	2643.99	4011.9	3327.94	967.263
2091.07	2601.03	3841.43	3221.23	877.091
2092.4	2545.48	3642.31	3093.9	775.579
2093.74	2485.19	3420.91	2953.05	661.654
2095.07	2425.35	3188.29	2806.82	539.479
2096.4	2372.65	2959.42	2666.03	414.91
2097.73	2328.24	2752.04	2540.14	299.67
2099.07	2282.01	2582.06	2432.04	212.169
2100.4	2225.57	2458.95	2342.26	165.029
2101.73	2156.24	2378.84	2267.54	157.398
2103.07	2077.25	2321.82	2199.54	172.935
2104.4	1995.58	2273.72	2134.65	196.669
2105.73	1920.47	2230.76	2075.62	219.414
2107.06	1863.96	2195.8	2029.88	234.649
2108.4	1835.55	2174.24	2004.89	239.488
2109.73	1843.24	2171.98	2007.61	232.456
2111.06	1889.45	2190.05	2039.75	212.558
2112.39	1964.89	2225.56	2095.23	184.318
2113.73	2041.77	2275.12	2158.45	164.998
2115.06	2112.75	2338.17	2225.46	159.392
2116.39	2170.86	2410.75	2290.8	169.628
2117.73	2215.88	2483.86	2349.87	189.493
2119.06	2246.97	2543.48	2395.22	209.67
2120.39	2266.98	2584.74	2425.86	224.692
2121.72	2279.34	2604.87	2442.11	230.181
2123.06	2293.26	2602.7	2447.98	218.809
2124.39	2314.04	2580.71	2447.38	188.565
2125.72	2346.22	2542.53	2444.38	138.811
2127.05	2390.65	2495.83	2443.24	74.3738
2128.39	2439.52	2452.34	2445.93	9.06924
2129.72	2486.37	2424.29	2455.33	43.9006
2131.05	2529.52	2417.98	2473.75	78.8723
2132.39	2565.84	2431.76	2498.8	94.8047
2133.72	2592.34	2456.29	2524.31	96.1991
2135.05	2608.65	2489.28	2548.97	84.4068
2136.38	2609.92	2527.14	2568.53	58.5345
2137.72	2592.55	2568.84	2580.69	16.7684
2139.05	2553.28	2616.71	2584.99	44.8475
2140.38	2494.84	2676.93	2585.88	128.758
2141.71	2419.53	2756.72	2588.12	238.425
2143.05	2333.76	2866.57	2600.16	376.751
2144.38	2245.03	3012.46	2628.75	542.659
2145.71	2161.89	3184.18	2673.04	722.868
2147.05	2089.11	3353.92	2721.51	894.354
2148.38	2030.02	3514.66	2772.34	1049.8
2149.71	1986.07	3664.14	2825.1	1186.57
2151.04	1954.74	3795.99	2875.37	1301.96
2152.38	1923.52	3903.5	2913.51	1400.06
2153.71	1880.16	3981.94	2931.05	1486.18
2155.04	1817.09	4030.22	2923.66	1564.92
2156.37	1733.32	4047.52	2890.42	1636.39
2157.71	1635.39	4035.15	2835.27	1696.89
2159.04	1537.58	3993.74	2765.66	1736.76
2160.37	1458.94	3926.25	2692.59	1744.65
2161.71	1424.42	3836.06	2630.24	1705.29
2163.04	1457.84	3726.9	2592.37	1604.47
2164.37	1584.1	3603.26	2593.68	1427.77
2165.7	1812.39	3471.02	2641.7	1172.82
2167.04	2061.11	3337.5	2699.3	902.54
2168.37	2317.29	3208.66	2762.97	630.287
2169.7	2565.67	3090.65	2828.16	371.213
2171.04	2800.91	2991.48	2896.2	134.755
2172.37	3015.88	2913.54	2964.71	72.365
2173.7	3204.38	2860.32	3032.35	243.285
2175.03	3361.11	2838.86	3099.98	369.288
2176.37	3482.33	2857.39	3169.86	441.897
2177.7	3568.24	2921.09	3244.66	457.601
2179.03	3617.95	3009.11	3313.53	430.511
2180.36	3632.46	3081.46	3356.96	389.617
2181.7	3615.03	3133.13	3374.08	340.754
2183.03	3568.66	3163.34	3366	286.604
2184.36	3500.38	3167.5	3333.94	235.383
2185.7	3415.01	3145.25	3280.13	190.749
2187.03	3318.08	3100.44	3209.26	153.899
2188.36	3213.89	3039.34	3126.62	123.427
2189.69	3106.65	2973.1	3039.87	94.4286
2191.03	2999.68	2918.25	2958.96	57.581
2192.36	2898.87	2890.41	2894.64	5.98247
2193.69	2812.5	2902.86	2857.68	63.8932
2195.02	2754.33	2965.81	2860.07	149.536
2196.36	2739.42	3078.37	2908.9	239.674
2197.69	2780.86	3212.14	2996.5	304.963
2199.02	2883.88	3344.58	3114.23	325.761
2200.36	3052.58	3471.73	3262.15	296.385
2201.69	3244.82	3593.4	3419.11	246.48
2203.02	3424.7	3713.45	3569.07	204.179
2204.35	3581.77	3838.83	3710.3	181.768
2205.69	3722.83	3975.61	3849.22	178.743
2207.02	3834.49	4133.92	3984.21	211.732
2208.35	3916.14	4322.07	4119.1	287.033
2209.68	3977.1	4542.14	4259.62	399.544
2211.02	4014.83	4784.22	4399.52	544.035
2212.35	4029.61	5033.58	4531.6	709.914
2213.68	4036.72	5281.77	4659.24	880.383
2215.02	4019.13	5520.91	4770.02	1061.92
2216.35	3971.48	5745.63	4858.56	1254.52
2217.68	3893.46	5953.98	4923.72	1457.01
2219.01	3782.15	6142.26	4962.2	1668.85
2220.35	3635.65	6306.93	4971.29	1888.88
2221.68	3457.64	6446.77	4952.2	2113.64
2223.01	3251.87	6560.11	4905.99	2339.28
2224.34	3026.4	6643.88	4835.14	2557.94
2225.68	2789.68	6695.76	4742.72	2762.02
2227.01	2556.93	6711.8	4634.37	2937.93
2228.34	2346.92	6690.93	4518.93	3071.68
2229.68	2173.87	6631.5	4402.69	3152.02
2231.01	2049.12	6531.21	4290.16	3169.31
2232.34	1978.64	6387.58	4183.11	3117.59
2233.67	1915.38	6199.99	4057.68	3029.67
2235.01	1853.52	5967.03	3910.27	2908.69
2236.34	1799.77	5688.61	3744.19	2749.82
2237.67	1753.23	5367.19	3560.21	2555.46
2239	1719.12	5010.69	3364.9	2327.5
2240.34	1707.63	4632.59	3170.11	2068.26
2241.67	1726.95	4247.46	2987.2	1782.27
2243	1782.03	3872.59	2827.31	1478.25
2244.34	1881.63	3525.33	2703.48	1162.28
2245.67	2024.28	3220.43	2622.36	845.805
2247	2177.91	2962.75	2570.33	554.968
2248.33	2314.41	2741.57	2527.99	302.046
2249.67	2434.64	2557.32	2495.98	86.7456
2251	2548.09	2423.81	2485.95	87.8784
2252.33	2653.34	2353.57	2503.45	211.969
2253.67	2744.46	2356.32	2550.39	274.457
2255	2824.41	2439.03	2631.72	272.504
2256.33	2895.43	2577.15	2736.29	225.058
2257.66	2962.5	2725.12	2843.81	167.852
2259	3027.94	2875.49	2951.71	107.804
2260.33	3092.2	3026.76	3059.48	46.277
2261.66	3158.13	3182.28	3170.2	17.0769
2262.99	3226.59	3341.13	3283.86	80.989
2264.33	3294.15	3506.47	3400.31	150.135
2265.66	3360.25	3682.49	3521.37	227.853
2266.99	3422.44	3871.55	3647	317.574
2268.33	3475.75	4075.04	3775.39	423.76
2269.66	3519.86	4283.99	3901.92	540.323
2270.99	3551.31	4488.01	4019.66	662.352
2272.32	3566.57	4681.34	4123.96	788.263
2273.66	3565.91	4857.95	4211.93	913.609
2274.99	3546.93	5012.99	4279.96	1036.66
2276.32	3504.6	5143.73	4324.17	1159.04
2277.65	3434.59	5245.01	4339.8	1280.16
2278.99	3329.77	5312.8	4321.29	1402.21
2280.32	3183.63	5346.9	4265.26	1529.66
2281.65	2992.02	5346.5	4169.26	1664.87
2282.99	2757.33	5309.97	4033.65	1804.99
2284.32	2487.22	5239.76	3863.49	1946.34
2285.65	2197.4	5139.37	3668.38	2080.29
2286.98	1914.76	5016.99	3465.87	2193.6
2288.32	1670.25	4881.83	3276.04	2270.93
2289.65	1495.38	4748.39	3121.88	2300.23
2290.98	1425.77	4628.72	3027.25	2264.83
2292.31	1477.31	4540.56	3008.94	2166.04
2293.65	1627.18	4500.13	3063.66	2031.48
2294.98	1887.98	4521.42	3204.7	1862.12
2296.31	2217.75	4606.75	3412.25	1689.27
2297.65	2558.97	4744.04	3651.5	1545.08
2298.98	2911.23	4906.52	3908.87	1410.88
2300.31	3271.48	5086.72	4179.1	1283.57
2301.64	3632.67	5278.07	4455.37	1163.47
2302.98	3991.02	5475.15	4733.09	1049.43
2304.31	4344.36	5670.75	5007.56	937.899
2305.64	4686.67	5860.03	5273.35	829.695
2306.97	5009.92	6033.59	5521.76	723.845
2308.31	5309.54	6178.67	5744.1	614.568
2309.64	5582.35	6285.14	5933.75	496.946
2310.97	5825.52	6346.93	6086.23	368.692
2312.31	6036.74	6357.69	6197.21	226.942
2313.64	6218.19	6313.1	6265.65	67.108
2314.97	6368.98	6211.29	6290.14	111.503
2316.3	6490.87	6052.1	6271.49	310.254
2317.64	6585.65	5836.41	6211.03	529.788
2318.97	6656.68	5564.49	6110.59	772.29
2320.3	6705.47	5239.43	5972.45	1036.65
2321.63	6733.06	4867.12	5800.09	1319.42
2322.97	6739.78	4458.5	5599.14	1613.11
2324.3	6723.74	4025.39	5374.56	1908.02
2325.63	6683.4	3584.41	5133.9	2191.32
2326.97	6616.37	3157.43	4886.9	2445.85
2328.3	6520.15	2770.13	4645.14	2651.67
2329.63	6393.2	2447.34	4420.27	2790.14
2330.96	6234.3	2217.23	4225.77	2840.5
2332.3	6042.49	2104.3	4073.4	2784.72
2333.63	5817.62	2094.74	3956.18	2632.48
2334.96	5563.32	2096.39	3829.85	2451.49
2336.29	5287.37	2096.71	3692.04	2256.13
2337.63	4998.18	2082.95	3540.57	2061.38
2338.96	4708.54	2051.9	3380.22	1878.53
2340.29	4435.43	2002.69	3219.06	1720.2
2341.63	4196.27	1938.12	3067.19	1596.75
2342.96	4006.02	1867.83	2936.93	1511.93
2344.29	3878.32	1804.37	2841.35	1466.5
2345.62	3816.34	1762.01	2789.18	1452.63
2346.96	3785.2	1756.68	2770.94	1434.38
2348.29	3761.88	1803.02	2782.45	1385.12
2349.62	3737.35	1889.6	2813.48	1306.55
2350.96	3706.7	1970.89	2838.8	1227.4
2352.29	3665.43	2044.71	2855.07	1146.02
2353.62	3610.11	2117.56	2863.83	1055.39
2354.95	3538.22	2199.21	2868.71	946.829
2356.29	3449.72	2296.58	2873.15	815.393
2357.62	3345.44	2420.44	2882.94	654.075
2358.95	3227.51	2582.12	2904.82	456.357
2360.28	3101.1	2786.44	2943.77	222.497
2361.62	2969.91	2995.61	2982.76	18.1755
2362.95	2838.69	3187.56	3013.12	246.684
2364.28	2710.74	3359.58	3035.16	458.797
2365.62	2589.35	3501.2	3045.27	644.775
2366.95	2472.82	3606.78	3039.8	801.83
2368.28	2366.35	3674.01	3020.18	924.654
2369.61	2272.96	3700.73	2986.84	1009.58
2370.95	2197.12	3682.54	2939.83	1050.35
2372.28	2146.57	3621.02	2883.79	1042.6
2373.61	2130.18	3518.69	2824.44	981.827
2374.94	2153.48	3378.47	2765.98	866.196
2376.28	2212.44	3208.18	2710.31	704.098
2377.61	2286.92	3018.31	2652.61	517.171
2378.94	2370.89	2820.51	2595.7	317.931
2380.28	2462.88	2630.72	2546.8	118.678
2381.61	2561.4	2467.04	2514.22	66.7265
2382.94	2666.73	2344.03	2505.38	228.181
2384.27	2774.86	2272.16	2523.51	355.467
2385.61	2881.82	2243.9	2562.86	451.077
2386.94	2983.71	2235.87	2609.79	528.8
2388.27	3074.79	2248.58	2661.69	584.223
2389.6	3146.99	2286.5	2716.75	608.459
2390.94	3194.33	2351.39	2772.86	596.047
2392.27	3211.1	2444.76	2827.93	541.882
2393.6	3192.72	2568.72	2880.72	441.234
2394.94	3133.37	2724.79	2929.08	288.909
2396.27	3034.27	2895.5	2964.88	98.122
2397.6	2898.58	3062.25	2980.42	115.734
2398.93	2732.97	3221.33	2977.15	345.328
2400.27	2547.76	3365.22	2956.49	578.032
2401.6	2355.12	3487.41	2921.27	800.655
2402.93	2172.3	3582.65	2877.48	997.271
2404.26	2023.18	3643.64	2833.41	1145.84
2405.6	1925.65	3665.69	2795.67	1230.39
2406.93	1895.96	3646.15	2771.06	1237.57
2408.26	1904.87	3588.26	2746.57	1190.33
2409.6	1896.15	3497.66	2696.9	1132.44
2410.93	1866.9	3390.08	2628.49	1077.05
2412.26	1820.6	3284.64	2552.62	1035.24
2413.59	1760.36	3203.68	2482.02	1020.58
2414.93	1699.12	3171.72	2435.42	1041.28
2416.26	1653.08	3210.22	2431.65	1101.07
2417.59	1646.85	3324.8	2485.83	1186.49
2418.92	1701.81	3446.52	2574.16	1233.7
2420.26	1837.14	3552.71	2694.93	1213.09
2421.59	2018.77	3638	2828.38	1144.97
2422.92	2212.35	3695.25	2953.8	1048.57
2424.26	2410.42	3719.48	3064.95	925.644
2425.59	2608.42	3711.86	3160.14	780.247
2426.92	2802.59	3679.96	3241.27	620.397
2428.25	2986.84	3631.37	3309.11	455.747
2429.59	3159.33	3577.34	3368.33	295.577
2430.92	3319.04	3529.64	3424.34	148.919
2432.25	3467.1	3497.62	3482.36	21.5854
2433.59	3604.87	3487.75	3546.31	82.8214
2434.92	3737.56	3500.65	3619.11	167.516
2436.25	3870	3508.68	3689.34	255.49
2437.58	4006.53	3497.48	3752.01	359.953
2438.92	4139.4	3464.2	3801.8	477.438
2440.25	4255.39	3409.72	3832.55	597.981
2441.58	4349.09	3343.8	3846.44	710.844
2442.91	4417.27	3277.12	3847.2	806.21
2444.25	4457.6	3227.51	3842.56	869.803
2445.58	4470.42	3218.13	3844.28	885.503
2446.91	4455.85	3273.29	3864.57	836.2
2448.25	4415.46	3414.61	3915.03	707.709
2449.58	4351.79	3660.65	4006.22	488.711
2450.91	4266.94	3935.63	4101.28	234.279
2452.24	4159.52	4209.83	4184.67	35.5754
2453.58	4029.74	4482.23	4255.99	319.958
2454.91	3877.18	4746.72	4311.95	614.859
2456.24	3705.98	4995.39	4350.68	911.753
2457.57	3521.61	5224.12	4372.86	1203.86
2458.91	3332.24	5426	4379.12	1480.51
2460.24	3148.85	5595.59	4372.22	1730.11
2461.57	2982.22	5730.39	4356.31	1943.25
2462.91	2841.84	5829.01	4335.43	2112.25
2464.24	2730.22	5887.16	4308.69	2232.3
2465.57	2648.09	5901.64	4274.87	2300.61
2466.9	2596.88	5869.45	4233.17	2314.06
2468.24	2578.93	5788.68	4183.8	2269.63
2469.57	2592.09	5658.25	4125.17	2168.1
2470.9	2638.7	5479.07	4058.88	2008.45
2472.23	2725.85	5254.02	3989.93	1787.69
2473.57	2857.68	4989.5	3923.59	1507.43
2474.9	3031.37	4693.69	3862.53	1175.44
2476.23	3236.21	4377.26	3806.74	806.841
2477.57	3452.44	4053.33	3752.88	424.893
2478.9	3670.42	3730.62	3700.52	42.5666
2480.23	3881.53	3418.93	3650.23	327.106
2481.56	4077.63	3116.78	3597.21	679.426
2482.9	4250.23	2811.46	3530.84	1017.37
2484.23	4395.32	2505.36	3450.34	1336.4
2485.56	4507.79	2210.92	3359.35	1624.13
2486.89	4583.11	1942.74	3262.92	1867.02
2488.23	4615.58	1722.2	3168.89	2045.93
2489.56	4603.7	1574	3088.85	2142.32
2490.89	4545.14	1523.31	3034.23	2136.75
2492.23	4440.59	1591.64	3016.11	2014.51
2493.56	4292.78	1775.51	3034.14	1779.98
2494.89	4106.64	2048.9	3077.77	1455.05
2496.22	3889.79	2368.79	3129.29	1075.51
2497.56	3650.97	2715.37	3183.17	661.571
2498.89	3397.88	3071.36	3234.62	230.884
2500.22	3138.84	3433.26	3286.05	208.189
2501.55	2882.78	3793.31	3338.04	643.843
2502.89	2637.41	4143.14	3390.27	1064.71
2504.22	2408.27	4477.44	3442.85	1463.12
2505.55	2205.24	4795.24	3500.24	1831.41
2506.89	2046.03	5092.43	3569.23	2154.13
2508.22	1947.57	5364.28	3655.92	2415.97
2509.55	1925.93	5608.53	3767.23	2603.99
2510.88	1993.03	5822.74	3907.88	2708.01
2512.22	2104.27	6002.32	4053.3	2756.34
2513.55	2214.23	6145.51	4179.87	2779.83
2514.88	2321.7	6250.42	4286.06	2778.03
2516.22	2413.57	6314.85	4364.21	2758.62
2517.55	2489.82	6336.42	4413.12	2719.96
2518.88	2542.35	6316.92	4429.64	2669.02
2520.21	2569.7	6256.75	4413.22	2607.13
2521.55	2568.36	6157.63	4363	2538
2522.88	2543.19	6022.86	4283.03	2460.5
2524.21	2497.02	5854.66	4175.84	2374.21
2525.54	2440.01	5653.08	4046.54	2271.98
2526.88	2380.55	5421.41	3900.98	2150.21
2528.21	2331.11	5162.63	3746.87	2002.19
2529.54	2298.27	4877.12	3587.69	1823.52
2530.88	2287.2	4565.6	3426.4	1611.08
2532.21	2295.98	4233.25	3264.61	1369.85
2533.54	2323.42	3885.95	3104.69	1104.87
2534.87	2358.52	3533.23	2945.88	830.652
2536.21	2395.27	3191.55	2793.41	563.057
2537.54	2429.63	2883.82	2656.73	321.16
2538.87	2460.83	2631.89	2546.36	120.96
2540.2	2486.87	2460.33	2473.6	18.7639
2541.54	2506.96	2395.5	2451.23	78.8149
2542.87	2521.84	2451.89	2486.86	49.4602
2544.2	2530.69	2583.45	2557.07	37.3127
2545.54	2534.69	2733.24	2633.97	140.399
2546.87	2534.75	2887.53	2711.14	249.456
2548.2	2532.35	3035.99	2784.17	356.127
2549.53	2526.26	3174.96	2850.61	458.697
2550.87	2514.79	3294.92	2904.86	551.635
2552.2	2493.65	3386.71	2940.18	631.488
2553.53	2461.78	3448.26	2955.02	697.544
2554.86	2418.02	3479.59	2948.8	750.639
2556.2	2366.38	3483.08	2924.73	789.626
2557.53	2310.22	3465.64	2887.93	817.009
2558.86	2257.92	3436.69	2847.3	833.52
2560.2	2219.13	3407.1	2813.11	840.017
2561.53	2204.83	3388.51	2796.67	836.987
2562.86	2221.4	3393.18	2807.29	828.572
2564.19	2276.48	3429.28	2852.88	815.157
2565.53	2371.04	3499.66	2935.35	798.058
2566.86	2491.91	3591.8	3041.85	777.742
2568.19	2601.96	3682.76	3142.36	764.239
2569.52	2687.96	3764.2	3226.08	761.017
2570.86	2744.47	3828.63	3286.55	766.619
2572.19	2765.47	3870.63	3318.05	781.467
2573.52	2747.11	3886.12	3316.62	805.398
2574.86	2684.02	3872.93	3278.47	840.683
2576.19	2577.82	3829.73	3203.77	885.236
2577.52	2432.65	3756.54	3094.59	936.135
2578.85	2256.77	3655.37	2956.07	988.96
2580.19	2063.4	3530.22	2796.81	1037.2
2581.52	1870.24	3385.79	2628.02	1071.65
2582.85	1696.92	3227.77	2462.34	1082.48
2584.18	1565.96	3059.47	2312.71	1056.07
2585.52	1496.52	2882.84	2189.68	980.276
2586.85	1502.79	2698.17	2100.48	845.258
2588.18	1594	2505.29	2049.64	644.383
2589.52	1724.69	2307.69	2016.19	412.243
2590.85	1858.14	2114.57	1986.35	181.324
2592.18	1991.14	1940.66	1965.9	35.6929
2593.51	2117.64	1801.12	1959.38	223.813
2594.85	2231.91	1719.59	1975.75	362.267
2596.18	2328.55	1719.71	2024.13	430.519
2597.51	2404.48	1819.48	2111.98	413.657
2598.84	2454.12	1989.52	2221.82	328.525
2600.18	2476.65	2197.22	2336.93	197.59
2601.51	2471.71	2431.15	2451.43	28.6768
2602.84	2442.73	2688.81	2565.77	174.005
2604.18	2398.3	2965.25	2681.78	400.896
2605.51	2351.83	3255.42	2803.63	638.936
2606.84	2319.44	3557.47	2938.46	875.42
2608.17	2320.43	3864.54	3092.48	1091.85
2609.51	2372.78	4167.45	3270.11	1269.02
2610.84	2485.2	4457.96	3471.58	1394.95
2612.17	2614.47	4731.78	3673.13	1497.16
2613.51	2736.91	4982.6	3859.75	1587.94
2614.84	2849.02	5205.77	4027.4	1666.47
2616.17	2950.96	5395.57	4173.27	1728.6
2617.5	3041.74	5548.98	4295.36	1772.89
2618.84	3118.25	5663.04	4390.64	1799.44
2620.17	3181.37	5736.88	4459.13	1807.01
2621.5	3229.98	5769.82	4499.9	1795.94
2622.83	3264.92	5764.35	4514.63	1767.36
2624.17	3286.29	5722.32	4504.31	1722.53
2625.5	3295.58	5646.63	4471.1	1662.44
2626.83	3292.23	5539.04	4415.64	1588.74
2628.17	3280.56	5402.89	4341.72	1500.71
2629.5	3263.09	5241.23	4252.16	1398.76
2630.83	3245.95	5055.08	4150.51	1279.25
2632.16	3232.61	4843.35	4037.98	1138.96
2633.5	3227.5	4605.27	3916.39	974.228
2634.83	3227.03	4340.54	3783.79	787.369
2636.16	3228.69	4049.3	3639	580.262
2637.49	3227.4	3734.44	3480.92	358.532
2638.83	3217.74	3403.38	3310.56	131.266
2640.16	3194.86	3067.98	3131.42	89.719
2641.49	3158.14	2739.32	2948.73	296.15
2642.83	3104.64	2430.65	2767.65	476.585
2644.16	3034.77	2157.56	2596.17	620.278
2645.49	2949.61	1929.63	2439.62	721.236
2646.82	2850.68	1746.26	2298.47	780.944
2648.16	2740.41	1617.97	2179.19	793.685
2649.49	2621.56	1564.2	2092.88	747.667
2650.82	2497.55	1602.05	2049.8	633.214
2652.15	2368.21	1734.13	2051.17	448.364
2653.49	2237.87	1882.68	2060.27	251.156
2654.82	2109.22	2032.54	2070.88	54.2177
2656.15	1986.72	2179.37	2083.04	136.224
2657.49	1874.48	2314.38	2094.43	311.061
2658.82	1778.65	2433.46	2106.06	463.021
2660.15	1701.36	2531.81	2116.59	587.217
[truncated: 2,504 more rows]
