# Supplementary material for: Ionogel thin films as a compatibilizing pretreatment for electrospray deposition
Source: Royal Society of Chemistry journal article supplement (doi:10.1039/d5lp00359h), 2026-01-01
Supplement: d5lp00359h1.zip [file C data.xlsx]

## Sheet: Sheet1
Lateral	Height Data	Height Data
µm	nm	nm
	3.1	3.2
0	-4.9307	-5.96465
1.33274	-5.09711	-6.04222
2.66548	-5.3622	-5.63843
3.99822	-5.19855	-5.32239
5.33096	-4.73509	-5.13363
6.66371	-4.43455	-4.42578
7.99645	-4.17125	-3.60701
9.32919	-3.61154	-3.2584
10.6619	-2.95559	-3.00692
11.9947	-2.60115	-2.77697
13.3274	-2.41628	-2.49266
14.6602	-2.14088	-2.34724
15.9929	-2.01039	-1.96195
17.3256	-1.88891	-1.70544
18.6584	-1.50793	-1.58563
19.9911	-1.35985	-1.35459
21.3239	-1.0765	-1.39033
22.6566	-0.782053	-1.32266
23.9893	-0.487419	-1.1467
25.3221	-0.582455	-0.866263
26.6548	-0.320017	-1.24803
27.9876	-0.441469	-1.296
29.3203	-0.198214	-1.48438
30.653	-0.205388	-1.30331
31.9858	0.157241	-1.37219
33.3185	-0.114257	-1.2024
34.6513	0.0960768	-1.42359
35.984	0.0528843	-1.5449
37.3167	0.12237	-1.80435
38.6495	0.0559673	-1.56488
39.9822	0.353906	-1.82012
41.315	0.138722	-1.57747
42.6477	-0.101433	-1.82601
43.9805	0.031376	-1.94482
45.3132	0.303043	-1.90752
46.6459	-0.0503815	-1.57184
47.9787	0.0894054	-1.69029
49.3114	0.240416	-1.52424
50.6442	0.263817	-1.06519
51.9769	0.147405	-0.95771
53.3096	0.14128	-0.854324
54.6424	0.127922	-1.01225
55.9751	0.109828	-0.801603
57.3079	0.0919789	-0.962477
58.6406	0.0791406	-0.745776
59.9733	0.0757538	-0.641972
61.3061	0.0828211	-0.410122
62.6388	0.476545	-0.684181
63.9716	0.242671	-0.465578
65.3043	0.361831	-0.613368
66.6371	0.218089	-0.379167
67.9698	0.181619	-0.378519
69.3025	0.00848238	-0.24308
70.6353	0.200513	-0.346619
71.968	0.256455	-0.0664655
73.3008	0.154696	-0.283088
74.6335	-0.11429	0.109811
75.9662	-0.16745	0.103081
77.299	-0.615815	0.034554
78.6317	-0.443944	-0.608181
79.9645	-0.501962	-0.560989
81.2972	-0.420837	-0.786837
82.6299	-0.698298	-1.28206
83.9627	-0.454838	-1.26612
85.2954	-0.303106	-1.08139
86.6282	-0.260891	-1.23625
87.9609	-0.213504	-0.994347
89.2936	-0.418347	-0.733687
90.6264	-0.124752	-0.983751
91.9591	0.0443685	-1.25899
93.2919	-0.060503	-1.41491
94.6246	-0.323926	-1.17957
95.9574	-0.229773	-1.1741
97.2901	-0.512284	-1.03696
98.6228	-0.290025	-1.14784
99.9556	-0.299065	-1.13642
101.288	-0.0496643	-1.37195
102.621	-0.171879	-1.09651
103.954	-0.302712	-1.05023
105.287	-0.180306	-0.869467
106.619	-0.0482205	-1.18011
107.952	-0.167497	-0.972474
109.285	0.0834794	-1.09498
110.618	-0.171203	-0.540938
111.95	-0.0655408	-0.429764
113.283	-0.0890326	-0.289108
114.616	0	0
115.948	-0.179664	0.298153
117.281	-0.134145	0.200984
118.614	-0.234666	0.312955
119.947	-0.361942	0.257513
121.279	-0.384127	0.150259
122.612	-0.5441	-0.128949
123.945	-0.7099	-0.18999
125.278	-0.739435	-0.38597
126.61	-0.616929	-0.327749
127.943	-0.463578	-0.249525
129.276	-0.536179	-0.530555
130.609	-0.337323	-0.418604
131.941	-0.363816	-0.0256783
133.274	-0.249606	-0.123184
134.607	0.00728413	-0.111626
135.94	0.145701	-0.36464
137.272	0.150573	-0.379234
138.605	0.0178251	-0.138962
139.938	0.132347	-0.527937
141.271	0.00402256	-0.177386
142.603	0.383819	-0.453077
143.936	0.521125	-0.372363
145.269	0.513076	-0.423146
146.602	0.221829	-0.609231
147.934	0.402865	-0.67018
149.267	0.189678	-0.587334
150.6	0.324854	-0.730209
151.932	0.0648404	-0.59788
153.265	0.15816	-0.310469
154.598	-0.258012	-0.13636
155.931	-0.0509863	-0.480173
157.263	-0.0737643	-0.22268
158.596	-0.0857672	-0.351655
159.929	0.0424941	-0.629005
161.262	-0.0658351	-0.660319
162.594	-0.0414825	-0.420095
163.927	0.118745	-0.53008
165.26	0.280789	-0.496416
166.593	0.300976	-0.435188
167.925	0.039471	-0.0987705
169.258	0	0
170.591	-0.0498978	-0.0386318
171.924	-0.231648	-0.220998
173.256	-0.0366185	-0.163072
174.589	0.0404453	-0.100381
175.922	-0.141434	-0.158302
177.255	-0.0840165	-0.0828628
178.587	-0.152822	0.00877872
179.92	-0.223808	0.115323
181.253	-0.162744	-0.145758
182.586	-0.213319	0.227494
183.918	0.00198471	0.366311
185.251	-0.141261	0.495858
186.584	0.102033	0.10529
187.916	0.112069	0.202708
189.249	0.253488	0.0649882
190.582	0.276581	0.195589
191.915	0.302135	0.477615
193.247	0.207787	0.77307
194.58	0.627205	0.429976
195.913	0.561917	0.438881
197.246	0.747043	0.448017
198.578	0.565777	0.461693
199.911	0.773305	0.489712
201.244	1.01341	0.672107
202.577	1.028	0.648268
203.909	1.31253	0.681891
205.242	1.49077	1.04939
206.575	1.41898	1.51092
207.908	1.84206	1.92002
209.24	1.8813	2.49137
210.573	1.6382	2.55191
211.906	1.74916	2.8023
213.239	1.73628	2.84648
214.571	1.72973	2.5377
215.904	1.74125	2.00931
217.237	2.1577	1.17666
218.57	2.22564	1.73755
219.902	2.29972	1.99601
221.235	2.2524	1.92575
222.568	2.5864	2.02422
223.9	2.55064	2.30398
225.233	2.7595	2.38679
226.566	2.72042	2.64095
227.899	2.55828	2.9443
229.231	2.79285	3.16553
230.564	3.06416	3.1714
231.897	3.23289	3.71586
233.23	3.40555	3.79571
234.562	3.56739	4.00636
235.895	3.57844	4.46509
237.228	3.30317	4.77256
238.561	3.50254	4.14095
239.893	3.31921	4.32665
241.226	3.37839	4.38111
242.559	3.19424	3.93862
243.892	3.52356	3.77925
245.224	3.74903	4.45478
246.557	3.72541	4.97027
247.89	3.57218	5.52847
249.223	3.42821	5.58803
250.555	3.69275	5.36954
251.888	4.00234	5.00998
253.221	4.21403	5.29723
254.554	4.43208	6.0134
255.886	4.38922	5.88731
257.219	4.19786	6.14466
258.552	4.49356	6.55033
259.884	4.53297	6.36282
261.217	4.4259	6.50055
262.55	4.42594	7.07949
263.883	4.29381	7.8674
265.215	4.41265	9.03293
266.548	4.66784	10.8897
267.881	4.42612	13.8476
269.214	4.56103	17.4571
270.546	4.59358	22.348
271.879	4.65195	27.488
273.212	4.74327	32.2346
274.545	4.9977	36.6775
275.877	5.28682	35.8298
277.21	5.5963	29.1
278.543	5.40628	32.8471
279.876	5.70839	43.306
281.208	5.3831	59.2273
282.541	6.04919	81.4723
283.874	6.08329	109.052
285.207	5.56394	141.318
286.539	6.00118	176.347
287.872	5.66414	203.383
289.205	5.4112	208.219
290.538	5.65065	195.292
291.87	5.27276	178.967
293.203	5.53052	176.138
294.536	5.31805	198.466
295.869	5.62551	224.273
297.201	6.08049	230.457
298.534	5.51743	224.224
299.867	5.91638	214.263
301.199	5.66886	216.193
302.532	5.25267	249.984
303.865	5.57045	312.632
305.198	5.26956	389.147
306.53	5.34876	467.153
307.863	5.33702	522.85
309.196	5.24205	552.927
310.529	5.70528	559.401
311.861	5.85479	542.041
313.194	6.29159	504.786
314.527	6.37506	455.999
315.86	6.33086	406.444
317.192	6.66185	367.897
318.525	6.6182	349.799
319.858	6.56125	358.282
321.191	7.12857	377.201
322.523	6.68606	387.181
323.856	6.96503	392.112
325.189	6.98872	397.569
326.522	6.99447	407.157
327.854	6.86084	409.343
329.187	6.84787	395.924
330.52	6.97209	372.889
331.853	6.98643	351.606
333.185	7.01193	348.634
334.518	7.42589	373.433
335.851	7.34309	418.033
337.183	7.11632	471.946
338.516	7.26044	513.159
339.849	7.41704	536.485
341.182	7.33116	538.939
342.514	7.5065	520.303
343.847	7.58204	481.709
345.18	7.55814	420.707
346.513	7.69344	345.483
347.845	8.12147	271.829
349.178	8.45627	218.147
350.511	8.29027	204.343
351.844	8.73741	210.708
353.176	8.54915	233.872
354.509	8.58442	278.242
355.842	8.61338	344.9
357.175	8.7731	433.388
358.507	8.70079	537.327
359.84	8.9137	625.857
361.173	9.065	695.964
362.506	9.42193	748.231
363.838	9.75355	784.02
365.171	10.4432	804.954
366.504	10.6092	812.174
367.837	11.3569	787.626
369.169	12.0515	731.319
370.502	12.8987	649.858
371.835	12.9827	556.53
373.167	12.8978	467.397
374.5	12.9305	404.04
375.833	13.1485	385.566
377.166	13.7578	404.075
378.498	14.9794	431.476
379.831	15.7857	450.238
381.164	16.7819	462.04
382.497	19.1154	476.678
383.829	21.4843	502.87
385.162	24.4264	535.231
386.495	28.2217	555.407
387.828	32.3554	561.348
389.16	35.5583	552.291
390.493	35.4384	530.477
391.826	25.8838	500.943
393.159	19.1892	469.74
394.491	18.2485	443.944
395.824	17.6757	426.367
397.157	16.5902	411.615
398.49	16.5744	390.9
399.822	15.9532	351.523
401.155	15.9058	299.066
402.488	15.9264	246.648
403.821	16.9248	208.7
405.153	18.6159	201.083
406.486	21.5863	220.262
407.819	25.5009	255.853
409.151	30.2525	309.003
410.484	35.6545	379.488
411.817	42.1574	457.023
413.15	48.7389	521.474
414.482	54.2292	569.775
415.815	52.8894	606.994
417.148	40.0763	636.306
418.481	30.6094	667.945
419.813	31.7466	709.465
421.146	33.9139	770.194
422.479	38.5808	832.342
423.812	45.6143	873.391
425.144	56.4722	890.035
426.477	71.7918	881.859
427.81	91.057	850.868
429.143	114.282	804.485
430.475	138.885	753.3
431.808	157.399	712.879
433.141	158.233	702.842
434.474	151.382	742.31
435.806	149.944	842.4
437.139	168.492	947.008
438.472	190.578	1043.28
439.805	198.77	1124.4
441.137	183.583	1186.91
442.47	152.025	1230.55
443.803	114.131	1255.41
445.135	83.3417	1265.52
446.468	72.1169	1266.21
447.801	64.2918	1264.22
449.134	55.9492	1262.79
450.466	48.714	1263.45
451.799	43.4031	1264.33
453.132	38.6185	1258.36
454.465	35.7323	1246.39
455.797	34.5451	1234.62
457.13	35.5152	1230.41
458.463	39.0351	1242.57
459.796	46.4631	1278.97
461.128	57.6555	1340.85
462.461	73.6752	1397.1
463.794	93.0036	1444.32
465.127	115.004	1479.23
466.459	136.697	1502.24
467.792	150.25	1512.07
469.125	144.193	1514.76
470.458	124.118	1512.84
471.79	99.9611	1512.13
473.123	91.7043	1515.24
474.456	105.407	1522.76
475.789	125.549	1529.66
477.121	153.905	1534.27
478.454	189.52	1534.92
479.787	228.94	1537.61
481.12	267.135	1546.68
482.452	278.649	1569.44
483.785	265.137	1607.5
485.118	231.036	1662.57
486.45	190.42	1722.61
487.783	159.772	1779.49
489.116	157.135	1830.11
490.449	165.543	1874.33
491.781	169.953	1910.35
493.114	181.993	1938.63
494.447	206.642	1962.1
495.78	233.678	1981.71
497.112	245.471	1996.64
498.445	238.209	2006.87
499.778	219.589	2013.58
501.111	199.251	2016.57
502.443	192.509	2019.54
503.776	216.872	2024.64
505.109	259.184	2032.93
506.442	314.911	2044.32
507.774	367.217	2060.54
509.107	415.969	2080.27
510.44	463.785	2101.95
511.773	503.564	2122.91
513.105	524.163	2142.68
514.438	525.304	2158.07
515.771	509.198	2167.45
517.104	484.504	2167.06
518.436	462.51	2157.1
519.769	457.904	2135.77
521.102	486.48	2104.81
522.434	549.998	2065.66
523.767	594.329	2023.66
525.1	607.838	1985.28
526.433	589.234	1959.6
527.765	541.206	1953.9
529.098	470.742	1974.68
530.431	387.135	2023.57
531.764	304.204	2096.55
533.096	235.708	2177.61
534.429	198.011	2253.95
535.762	178.086	2320.2
537.095	164.76	2373.1
538.427	158.146	2409.33
539.76	161.429	2424.66
541.093	173.109	2416.37
542.426	193.855	2384.45
543.758	215.139	2333.19
545.091	235.294	2268.95
546.424	263.196	2205.36
547.757	303.347	2156.49
549.089	327.512	2139.46
550.422	326.743	2167.99
551.755	308.639	2252.16
553.088	284.745	2377.98
554.42	273.265	2515.45
555.753	293.248	2653.13
557.086	331.729	2788.72
558.418	360.007	2916.55
559.751	364.412	3030.25
561.084	352.809	3123.15
562.417	335.445	3188.85
563.749	325.282	3223.63
565.082	333.875	3224.66
566.415	355.556	3189.51
567.748	393.117	3119.94
569.08	433.666	3017.61
570.413	467.432	2886.85
571.746	493.11	2736.44
573.079	506.341	2577.55
574.411	496.823	2423.94
575.744	462.562	2289.5
577.077	408.767	2189.37
578.41	343.712	2135.69
579.742	280.507	2130.79
581.075	235.986	2161.46
582.408	224.439	2223.43
583.741	226.044	2306
585.073	235.474	2405.76
586.406	250.348	2516.27
587.739	257.542	2638.57
589.072	255.14	2771.25
590.404	248.835	2913.1
591.737	246.09	3059.61
593.07	253.86	3206.11
594.402	281.163	3343.8
595.735	326.904	3465.17
597.068	382.725	3565.31
598.401	436.039	3638.09
599.733	476.282	3678.49
601.066	503.036	3682.28
602.399	523.27	3647.13
603.732	543.121	3572.86
605.064	558.074	3462.6
606.397	540.368	3323.65
607.73	488.699	3166.1
609.063	414.488	3006.31
610.395	331.495	2867.28
611.728	260.122	2773.82
613.061	222.648	2751.18
614.394	215.773	2823.5
615.726	218.462	2999.18
617.059	233.618	3205.13
618.392	260.392	3424.04
619.725	298.019	3644.35
621.057	337.191	3865.88
622.39	366.929	4078.79
623.723	388.741	4281.17
625.056	404.828	4469.49
626.388	415.614	4645.19
627.721	426.655	4808.32
629.054	435.021	4959.73
630.386	440.478	5102.01
631.719	447.857	5238.4
633.052	467.559	5370.9
634.385	505.619	5500.19
635.717	547.062	5620.96
637.05	584.92	5722.82
638.383	610.386	5794.04
639.716	626.799	5825.91
641.048	639	5811.31
642.381	649.507	5743.02
643.714	664.942	5615.07
645.047	690.548	5424.07
646.379	727.337	5169.94
647.712	761.87	4860.1
649.045	786.836	4505.46
650.378	793.676	4120.19
651.71	778.352	3725.76
653.043	741.731	3352.32
654.376	692.815	3032.54
655.709	641.961	2800
657.041	602.487	2687.96
658.374	587.45	2722.91
659.707	589.849	2863.86
661.04	583.22	3046.99
662.372	573.573	3225.52
663.705	573.356	3389.94
665.038	593.977	3546.07
666.371	623.789	3692.16
667.703	649.599	3824.74
669.036	668.263	3936.68
670.369	681.063	4027.02
671.701	689.319	4084.76
673.034	685.497	4104.22
674.367	668.756	4080.8
675.7	644.21	4014.44
677.032	620.388	3906.46
678.365	605.839	3759.29
679.698	608.877	3577.75
681.031	610.209	3365.88
682.363	600.617	3132.61
683.696	577.22	2891.73
685.029	547.569	2659.78
686.362	519.824	2455.9
687.694	505.599	2298.12
689.027	506.656	2189.74
690.36	492.403	2131.31
691.693	459.382	2141.56
693.025	416.757	2242.74
694.358	374.507	2452.27
695.691	347.602	2764.92
697.024	331.641	3083.98
698.356	327.661	3401.02
699.689	345.337	3712.3
701.022	383.867	4007.96
702.355	417.068	4279.99
703.687	434.409	4526.17
705.02	443.484	4743.27
706.353	453.818	4927.36
707.685	476.105	5079.13
709.018	517.178	5200.73
710.351	572.275	5293.53
711.684	610.023	5360.35
713.016	620.767	5399.71
714.349	607.257	5411.99
715.682	580.594	5397.28
717.015	551.353	5354.85
718.347	535.411	5284.05
719.68	538.774	5184.34
721.013	543.59	5049.79
722.346	526.506	4872.73
723.678	496.101	4650.63
725.011	458.829	4385.77
726.344	423.37	4081.5
727.677	401.259	3748.34
729.009	408.353	3399.23
730.342	450.643	3055.63
731.675	490.791	2743.22
733.008	512.529	2486.14
734.34	521.09	2305.15
735.673	517.139	2219.88
737.006	509.148	2216.45
738.339	498.138	2253.79
739.671	483.406	2304.73
741.004	475.198	2359.12
742.337	489.117	2413.52
743.669	539.825	2465.9
745.002	602.572	2517.77
746.335	644.723	2575.7
747.668	671.842	2648.84
749	686.27	2750.72
750.333	688.906	2892.18
751.666	680.44	3082.77
752.999	660.575	3322.2
754.331	636.953	3584.09
755.664	616.509	3854.03
756.997	606.555	4122.73
758.33	606.778	4384.48
759.662	625.911	4630.54
760.995	660.515	4855.72
762.328	691.714	5057.53
763.661	716.423	5234.85
764.993	733.615	5384.15
766.326	734.338	5505.05
767.659	718.525	5599.62
768.992	688.156	5668.42
770.324	649.722	5709.92
771.657	610.394	5725.71
772.99	578.146	5714.79
774.323	563.531	5673.73
775.655	563.407	5598.82
776.988	558.482	5485.47
778.321	553.3	5325.68
779.653	560.532	5114.69
780.986	589.823	4848.66
782.319	618.317	4526.19
783.652	626.047	4154.31
784.984	620.98	3748.13
786.317	609.329	3328.55
787.65	597.415	2923.98
788.983	586.251	2574.46
790.315	575.619	2323.03
791.648	568.531	2209.09
792.981	569.488	2263.81
794.314	577.9	2477.01
795.646	592.92	2731.95
796.979	616.334	3007.59
798.312	639.806	3291.99
799.645	653.662	3574.98
800.977	655.245	3851.85
802.31	644.155	4116.4
803.643	626.963	4360.44
804.976	611.714	4580.66
806.308	610.933	4773.79
807.641	633.918	4937.26
808.974	660.736	5065.54
810.307	670.702	5154.72
811.639	669.342	5202.79
812.972	662.823	5211.16
814.305	658.875	5183.06
815.637	659.367	5122.49
816.97	659.525	5035.14
818.303	663.471	4928.93
819.636	678.294	4813.06
820.968	704.95	4697.67
822.301	735.149	4592.25
823.634	765.788	4503.85
824.967	797.734	4432.9
826.299	825.092	4372.22
827.632	845.885	4316.68
828.965	855.567	4257.37
830.298	855.964	4189.74
831.63	839.034	4109.39
832.963	806.234	4012.31
834.296	763.443	3898.01
835.629	722.88	3768.45
836.961	698.82	3626.44
838.294	705.177	3480.24
839.627	734.569	3334.5
840.96	748.04	3196.26
842.292	745.695	3068.41
843.625	731.692	2952.83
844.958	712.215	2837.35
846.291	693.081	2712.33
847.623	679.466	2578.4
848.956	672.626	2442.57
850.289	670.21	2310.17
851.622	664.596	2186.41
852.954	655.774	2079.37
854.287	648.807	1993.71
855.62	651.646	1929.42
856.952	670.871	1883.54
858.285	710.186	1842.54
859.618	760.551	1801.45
860.951	808.802	1763.09
862.283	849.516	1734.1
863.616	877.976	1722.37
864.949	894.004	1729.4
866.282	897.159	1747.36
867.614	893.005	1770.42
868.947	884.977	1800.36
870.28	876.365	1840.89
871.613	866.044	1895.11
872.945	855.69	1961.67
874.278	843.589	2043.76
875.611	828.987	2140.59
876.944	812.02	2240.35
878.276	795.645	2332.62
879.609	784.642	2413.05
880.942	790.109	2477.71
882.275	822.546	2524.46
883.607	881.536	2552.68
884.94	925.318	2562.52
886.273	944.592	2554.57
887.606	938.52	2531.58
888.938	908.721	2495.01
890.271	861.871	2444.63
891.604	804.295	2380.25
892.936	745.98	2305.21
894.269	696.624	2222.96
895.602	666.109	2144.19
896.935	653.826	2083.67
898.267	650.614	2055.13
899.6	650.125	2073.05
900.933	646.786	2144.45
902.266	643.561	2270
903.598	644.657	2435.56
904.931	649.574	2626.42
906.264	657.325	2835.94
907.597	670.294	3059.04
908.929	692.177	3289.45
910.262	718.074	3517.5
911.595	740.741	3731.41
912.928	760.446	3925.76
914.26	781.267	4094.27
915.593	806.781	4231.27
916.926	838.097	4329.12
918.259	870.714	4383.84
919.591	899.845	4388.99
920.924	922.649	4341.83
922.257	939.389	4239.73
923.59	951.327	4083.66
924.922	959.953	3876.75
926.255	964.912	3630.79
927.588	965.192	3360.61
928.92	962.716	3088.38
930.253	962.65	2844.37
931.586	970.782	2662.63
932.919	990.199	2574.59
934.251	1020.28	2609.19
935.584	1046.88	2777.83
936.917	1060.07	2982.84
938.25	1057.56	3217.26
939.582	1039.8	3476.11
940.915	1007.74	3750.36
942.248	965.468	4033.95
943.581	916.719	4320.99
944.913	867.928	4601.99
946.246	824.331	4869.98
947.579	791.771	5122.31
948.912	773.883	5355.27
950.244	766.81	5563.62
951.577	751.654	5744.45
952.91	732.026	5896.35
954.243	717.148	6016.05
955.575	716.074	6099.25
956.908	732.05	6146.43
958.241	756.549	6157.21
959.574	784.481	6131.97
960.906	813.855	6073.8
962.239	842.424	5986.06
963.572	869.533	5868.73
964.904	894.447	5724.46
966.237	916.465	5555.41
967.57	931.849	5362.23
968.903	936.871	5144.23
970.235	931.02	4900.23
971.568	916.555	4623.73
972.901	896.002	4311.33
974.234	872.315	3964.25
975.566	850.043	3584.55
976.899	831.591	3177.29
978.232	820.54	2751.86
979.565	818.732	2326.51
980.897	823.29	1923.06
982.23	829.984	1565.22
983.563	837.854	1277.44
984.896	845.142	1081.78
986.228	856.887	979.419
987.561	880.528	939.322
988.894	922.009	955.975
990.227	983.129	1021.9
991.559	1038.86	1124.45
992.892	1082.16	1269.77
994.225	1108.09	1462.15
995.558	1114.99	1659.51
996.89	1105.22	1852.5
998.223	1083.74	2037.63
999.556	1056.82	2210.79
1000.89	1030.16	2371.05
1002.22	1009.86	2516.2
1003.55	1001.94	2643.36
1004.89	1014.06	2750.82
1006.22	1040.8	2836.97
1007.55	1072.92	2897.38
1008.88	1108.22	2926.1
1010.22	1150.43	2919.9
1011.55	1202.78	2877.17
1012.88	1265.22	2797.8
1014.22	1332.16	2685.29
1015.55	1387.38	2549.1
1016.88	1420.27	2402.25
1018.21	1426.44	2263.5
1019.55	1405.06	2150.24
1020.88	1360.73	2077.65
1022.21	1300.58	2052.18
1023.55	1233.52	2069.89
1024.88	1172.3	2108.76
1026.21	1127.57	2160.71
1027.54	1103.58	2221.96
1028.88	1097.03	2287.46
1030.21	1095.69	2352.02
1031.54	1091.7	2410.38
1032.87	1085.63	2453.37
1034.21	1080.38	2474.67
1035.54	1076.08	2474.81
1036.87	1071.66	2462.6
1038.21	1065.77	2450.71
1039.54	1053.74	2456.64
1040.87	1035.52	2497.78
1042.2	1013.91	2588.83
1043.54	994.563	2734.61
1044.87	981.656	2909.27
1046.2	977.173	3097.39
1047.53	978.465	3293.8
1048.87	983.495	3495.56
1050.2	994.144	3699.36
1051.53	1009.57	3898.2
1052.87	1030.44	4084.4
1054.2	1060.98	4252.7
1055.53	1105.8	4402.75
1056.86	1163.46	4534.06
1058.2	1217.34	4644.26
1059.53	1262.6	4735.17
1060.86	1298.56	4807.16
1062.19	1325.01	4858.96
1063.53	1344.02	4890.6
1064.86	1357.37	4903.21
1066.19	1366.98	4897.14
1067.53	1375.51	4874.05
1068.86	1381.51	4837.11
1070.19	1383.46	4787.73
1071.52	1379.18	4726.94
1072.86	1368.31	4656.44
1074.19	1350.99	4577.68
1075.52	1329.13	4488.4
1076.85	1301.53	4384.41
1078.19	1265.83	4263.02
1079.52	1224.24	4124.43
1080.85	1180.74	3972.81
1082.19	1141.74	3814.95
1083.52	1114.77	3660.04
1084.85	1106.42	3520.76
1086.18	1117.91	3413.23
1087.52	1143.07	3353.6
1088.85	1173.11	3354.19
1090.18	1203.31	3423.66
1091.51	1228.22	3548.93
1092.85	1245.46	3699.75
1094.18	1253.18	3863.83
1095.51	1250.35	4031.96
1096.85	1237.75	4198.2
1098.18	1217.77	4361.13
1099.51	1192.99	4516.86
1100.84	1167.77	4660.38
1102.18	1147.43	4785.68
1103.51	1134.08	4887.44
1104.84	1126.35	4959.19
1106.18	1123.95	4994.95
1107.51	1128.19	4991.14
1108.84	1140.2	4944.88
1110.17	1158.28	4853.55
1111.51	1184.18	4719.09
1112.84	1221.31	4546.44
1114.17	1274.8	4343.53
1115.5	1347.55	4118.55
1116.84	1430.8	3880.57
1118.17	1514.53	3648.13
1119.5	1594.54	3441.95
1120.84	1665.95	3265.23
1122.17	1724.5	3120.28
1123.5	1768.04	3011.08
1124.83	1790.02	2944.83
1126.17	1783.37	2928.19
1127.5	1745.66	2982.86
1128.83	1681.18	3092.82
1130.16	1596.66	3213.22
1131.5	1505.38	3336.82
1132.83	1421.78	3466.91
1134.16	1361.44	3603.09
1135.5	1337.74	3740.04
1136.83	1355.5	3874.61
1138.16	1393.61	4000.89
1139.49	1439.67	4113.99
1140.83	1479.69	4209.4
1142.16	1505.19	4286.81
1143.49	1513.2	4342.66
1144.82	1503.59	4374.07
1146.16	1476.84	4380.41
1147.49	1437.42	4364.9
1148.82	1389.74	4331.2
1150.16	1340.7	4286.53
1151.49	1295.45	4238.62
1152.82	1262.27	4193.12
1154.15	1250.18	4154.27
1155.49	1265.52	4126.24
1156.82	1306.52	4110.55
1158.15	1358.16	4109.85
1159.48	1415.68	4125.41
1160.82	1481.42	4150.21
1162.15	1560.37	4174.5
1163.48	1654.24	4190.37
1164.82	1758.65	4193.01
1166.15	1853.46	4175.84
1167.48	1924.9	4128.44
1168.81	1965.22	4042.52
1170.15	1972.8	3915.85
1171.48	1948.79	3753.17
1172.81	1898.43	3563.93
1174.14	1830.76	3363.51
1175.48	1760.09	3173.51
1176.81	1700.18	3019.51
1178.14	1665.77	2926.51
1179.48	1669.87	2921.21
1180.81	1697.59	3000.57
1182.14	1712.18	3096.86
1183.47	1710.86	3205.07
1184.81	1694.47	3314.55
1186.14	1666.68	3418.69
1187.47	1634.92	3512.7
1188.8	1606.8	3588.33
1190.14	1591.5	3637.69
1191.47	1594.61	3657.16
1192.8	1624.86	3643.14
1194.14	1685.52	3596.48
1195.47	1774.02	3522.23
1196.8	1890.79	3430.79
1198.13	2036.64	3337.21
1199.47	2196.71	3262.97
1200.8	2349.42	3227.45
1202.13	2485.11	3247.61
1203.47	2596.69	3330.26
1204.8	2678.16	3411.43
1206.13	2727.7	3481.54
1207.46	2741.37	3538.39
1208.8	2720.25	3578.21
1210.13	2668.44	3602.1
1211.46	2592.45	3610.55
1212.79	2499.23	3605.29
1214.13	2399.84	3587.73
1215.46	2305.18	3557.37
1216.79	2222.55	3516.42
1218.13	2157.83	3465.09
1219.46	2108.59	3400.19
1220.79	2066.05	3323.1
1222.12	2026.37	3237.36
1223.46	1987.94	3148.17
1224.79	1949.6	3064.73
1226.12	1911.8	2995.64
1227.45	1874.97	2949.21
1228.79	1843.7	2931.1
1230.12	1823.46	2937.77
1231.45	1821.8	2959.22
1232.79	1844	2989.7
1234.12	1891.59	3020.05
1235.45	1967.08	3039.32
1236.78	2076.84	3043.81
1238.12	2215.33	3033.31
1239.45	2360.77	3007.34
1240.78	2511.12	2968.39
1242.11	2661.43	2920.43
1243.45	2803.56	2870.72
1244.78	2930.4	2824.66
1246.11	3034.45	2789.57
1247.45	3108.04	2771.95
1248.78	3145.47	2776.6
1250.11	3145.35	2800.02
1251.44	3107.21	2823.43
1252.78	3034.7	2832.52
1254.11	2938.12	2827.64
1255.44	2829.65	2810.04
1256.77	2725.4	2783.97
1258.11	2641.53	2755.45
1259.44	2587.75	2731.95
1260.77	2566.16	2719.3
1262.11	2576.85	2721.58
1263.44	2608.76	2740.19
1264.77	2643.01	2772.23
1266.1	2668.69	2808.36
1267.44	2678.97	2848.5
1268.77	2668.68	2897
1270.1	2635.07	2959.25
1271.43	2577.65	3042.3
1272.77	2498.83	3149.78
1274.1	2403.75	3276.74
1275.43	2301.29	3408.65
1276.77	2199.35	3534.25
1278.1	2105.63	3644.26
1279.43	2023.39	3733.06
1280.76	1956.23	3795.22
1282.1	1908.43	3827.58
1283.43	1888.07	3828.53
1284.76	1899.39	3798.93
1286.1	1946.4	3738.34
1287.43	2015.34	3646.18
1288.76	2080.4	3521.1
1290.09	2135.58	3362.82
1291.43	2177.95	3168.82
1292.76	2207.75	2938.7
1294.09	2224.21	2677.7
1295.42	2227.87	2396.87
1296.76	2219.17	2115.65
1298.09	2197.24	1856.4
1299.42	2160.61	1645.42
1300.76	2108.54	1512.16
1302.09	2042.32	1483.93
1303.42	1969.03	1558.15
1304.75	1898.19	1713.24
1306.09	1845.05	1898.68
1307.42	1820.6	2097.48
1308.75	1835.81	2301.73
1310.08	1880.58	2502.42
1311.42	1916.32	2694.17
1312.75	1938.24	2874.2
1314.08	1949.98	3040.1
1315.42	1951.28	3189.62
1316.75	1949.67	3316.96
1318.08	1951.14	3418.82
1319.41	1965.55	3489.71
1320.75	1996.69	3523
1322.08	2049.52	3512.43
1323.41	2123.41	3453.09
1324.74	2216.44	3341.94
1326.08	2321.42	3181.49
1327.41	2425.25	2978.04
1328.74	2516.96	2744.65
1330.08	2592.69	2500.79
1331.41	2648.67	2270.9
1332.74	2683.57	2080.42
1334.07	2698.19	1956.37
1335.41	2694.89	1926.14
1336.74	2678.88	1956.23
1338.07	2653.46	2018.63
1339.4	2623.76	2115.84
1340.74	2594.51	2237.9
1342.07	2568.38	2377.38
1343.4	2545.39	2522.12
1344.74	2522.21	2669.15
1346.07	2490.99	2811.85
1347.4	2448.96	2947.8
1348.73	2396.69	3071.69
1350.07	2336.52	3178.33
1351.4	2271.24	3261.44
1352.73	2206.69	3315.64
1354.06	2146.59	3337.37
1355.4	2089.1	3323.01
1356.73	2034.29	3271.55
1358.06	1985.81	3183.39
1359.4	1948.21	3061.54
1360.73	1927.76	2912.78
1362.06	1928.91	2749.19
1363.39	1953.2	2586.35
1364.73	1996.56	2444.77
1366.06	2052.9	2342.82
1367.39	2115.68	2295.07
1368.73	2171.9	2310.48
1370.06	2209.99	2389.68
1371.39	2224.14	2512.64
1372.72	2213.96	2639.96
1374.06	2181.4	2761.41
1375.39	2132.15	2874.24
1376.72	2073.43	2977.2
1378.05	2015.9	3069.93
1379.39	1971.43	3151.69
1380.72	1951.42	3225.45
1382.05	1961.03	3293.85
1383.39	1998.96	3354.34
1384.72	2054.85	3397.29
1386.05	2112.99	3413.19
1387.38	2166.17	3396.51
1388.72	2210.28	3343.29
1390.05	2242.32	3253.41
1391.38	2262.43	3130.45
1392.71	2272.96	2980.12
1394.05	2277.08	2812.09
1395.38	2280.04	2639.13
1396.71	2287.32	2474.13
1398.05	2303.85	2332.34
1399.38	2328.69	2225.91
1400.71	2358.72	2155.66
1402.04	2389.54	2112.67
1403.38	2417.18	2091.5
1404.71	2437.43	2079.82
1406.04	2447.1	2065.89
1407.37	2443.06	2045.58
1408.71	2423.71	2016.27
1410.04	2388.64	1977.56
1411.37	2338.06	1930.11
1412.71	2274.78	1874.18
1414.04	2204.89	1816.56
1415.37	2136.35	1766.72
1416.7	2076.8	1734.06
1418.04	2034.95	1728.69
1419.37	2017.41	1756.28
1420.7	2022.29	1803.18
1422.03	2044.19	1856.7
1423.37	2072.41	1920.14
1424.7	2093.74	1995.7
1426.03	2104.15	2084.59
1427.37	2101.66	2184.47
1428.7	2085.48	2288.87
1430.03	2055.93	2390.55
1431.36	2015.21	2484.67
1432.7	1965.97	2563.1
1434.03	1911.55	2619.18
1435.36	1854.87	2648.68
1436.69	1798.4	2651.73
1438.03	1743.49	2629.51
1439.36	1691.55	2589.35
1440.69	1646.09	2542.59
1442.03	1612.96	2503.04
1443.36	1601.27	2489.77
1444.69	1618.09	2519.79
1446.02	1665.74	2601.14
1447.36	1735.69	2714.08
1448.69	1817.68	2836.08
1450.02	1895.47	2959.19
1451.35	1960.31	3077.91
1452.69	2008.2	3186.55
1454.02	2038.95	3279.87
1455.35	2054.63	3354.12
1456.69	2058.9	3406.11
1458.02	2056.23	3431.45
1459.35	2053.56	3429.06
1460.68	2059.59	3397.27
1462.02	2082.64	3333.97
1463.35	2130.2	3236.5
1464.68	2203.04	3104.27
1466.02	2293.19	2939.1
1467.35	2393.92	2751.01
1468.68	2498.88	2551.9
1470.01	2599.51	2357.2
1471.35	2681.93	2188.4
1472.68	2738.24	2069.49
1474.01	2764.22	2019.9
1475.34	2757.99	2050.57
1476.68	2720.76	2088.3
1478.01	2659.35	2117.23
1479.34	2584.3	2130.38
1480.68	2508.69	2128.13
1482.01	2449.39	2107.19
1483.34	2424.83	2067.35
1484.67	2453.52	2010.94
1486.01	2549.89	1939.15
1487.34	2725.15	1858.44
1488.67	2921.39	1776.44
1490	3108.44	1704.36
1491.34	3277.83	1652.61
1492.67	3422.76	1624.78
1494	3537.89	1608.34
1495.34	3615.01	1610.51
1496.67	3647.65	1637.48
1498	3631.84	1676.92
1499.33	3565.44	1707.33
1500.67	3449.31	1727.7
1502	3289.92	1735.24
1503.33	3098.28	1731.16
1504.66	2891.67	1715.35
1506	2689.54	1688.32
1507.33	2513.34	1648.34
1508.66	2380.57	1593.5
1510	2309.16	1517.01
1511.33	2273.97	1417.7
1512.66	2246.29	1301.5
1513.99	2234.93	1179.59
1515.33	2237.31	1067.53
1516.66	2257.34	983.725
1517.99	2292.39	944.441
1519.32	2333.72	962.329
1520.66	2376.54	1041.83
1521.99	2418.57	1153.1
1523.32	2459.26	1288.94
1524.66	2496.13	1455.15
1525.99	2525.15	1656.89
1527.32	2539.71	1899.35
1528.65	2534.58	2176.84
1529.99	2505.74	2449.75
1531.32	2452.94	2704.73
1532.65	2379.34	2935.07
1533.98	2291.53	3133.89
1535.32	2200.95	3291.65
1536.65	2122.01	3400.81
1537.98	2070.18	3459.05
1539.32	2062.7	3465.32
1540.65	2113.73	3420.67
1541.98	2225.18	3328.95
1543.31	2366.89	3195.81
1544.65	2508.11	3030.52
1545.98	2639.23	2849.56
1547.31	2753.47	2672.31
1548.65	2845.33	2522.2
1549.98	2908.53	2426.36
1551.31	2941.15	2408.49
1552.64	2943.27	2480.17
1553.98	2916.68	2560.06
1555.31	2863.42	2629.03
1556.64	2788.15	2684.1
1557.97	2694.82	2722.52
1559.31	2588.17	2741.15
1560.64	2473.37	2738.03
1561.97	2356.34	2712.41
1563.31	2241.23	2668.55
1564.64	2132.18	2611.45
1565.97	2030.49	2550.73
1567.3	1936.48	2493.81
1568.64	1846.55	2445.78
1569.97	1755.86	2404.82
1571.3	1659.93	2366.46
1572.63	1560.79	2325.8
1573.97	1464.33	2281.67
1575.3	1379.31	2231.82
1576.63	1314.45	2175.92
1577.97	1282.96	2116.43
1579.3	1285.73	2056.68
1580.63	1312.69	1995.39
1581.96	1367.07	1935.02
1583.3	1445	1880.51
1584.63	1531.99	1836.89
1585.96	1613.05	1808.65
1587.29	1684.66	1799.52
1588.63	1744.05	1809.7
1589.96	1792	1832.52
1591.29	1829.66	1868.19
1592.63	1858.9	1918.76
1593.96	1879.62	1983.8
1595.29	1895.47	2060.1
1596.62	1909.64	2145.91
1597.96	1926.88	2240.21
1599.29	1949.42	2342.92
1600.62	1977.35	2457.1
1601.95	2002.81	2587.3
1603.29	2020.54	2734.52
1604.62	2026.31	2901.98
1605.95	2020.14	3090.44
1607.29	2005.75	3297.82
1608.62	1992.96	3515.93
1609.95	1995.36	3735.07
1611.28	2029.81	3946.29
1612.62	2113.29	4139.52
1613.95	2258.3	4306.34
1615.28	2463.24	4442.75
1616.61	2684.51	4543.78
1617.95	2904.12	4602.84
1619.28	3114.39	4612.72
1620.61	3311.89	4571.45
1621.95	3491.24	4475.91
1623.28	3646.87	4325.58
1624.61	3775.88	4123.79
1625.94	3875.66	3879.98
1627.28	3941.33	3607.49
1628.61	3971.52	3327.89
1629.94	3967.29	3065.23
1631.27	3929.96	2843.85
1632.61	3862.03	2692.49
1633.94	3764.44	2633.87
1635.27	3636.78	2682.99
1636.61	3482.1	2837.53
1637.94	3304.26	3022.31
1639.27	3111.78	3213.25
1640.6	2910.75	3405.32
1641.94	2712.58	3586.25
1643.27	2524.12	3750.39
1644.6	2348.47	3891.57
1645.94	2185.01	4007.8
1647.27	2037.24	4093.1
1648.6	1908.26	4144.51
1649.93	1796.04	4157.95
1651.27	1704.6	4131.56
1652.6	1645.09	4064.45
1653.93	1626.48	3956.86
1655.26	1654.3	3809.63
1656.6	1700.81	3628.34
1657.93	1757.85	3421
1659.26	1815.26	3195.71
1660.6	1859.23	2964.32
1661.93	1887.39	2741.28
1663.26	1898.3	2539.67
1664.59	1895.64	2369.02
1665.93	1883.68	2237.34
1667.26	1871.79	2145.85
1668.59	1871.25	2091.08
1669.92	1895.55	2062.29
1671.26	1956.69	2045.31
1672.59	2048.78	2027.39
1673.92	2137.16	2005.3
1675.26	2216	1980.21
1676.59	2279.91	1954.79
1677.92	2329.43	1933.7
1679.25	2363.98	1924.37
1680.59	2382.31	1929.21
1681.92	2385.21	1945.84
1683.25	2375.83	1969.76
1684.58	2355.18	1999.21
1685.92	2326.86	2026.78
1687.25	2293.07	2046.71
1688.58	2255.44	2052.6
1689.92	2215.16	2041.69
1691.25	2171.41	2013.57
1692.58	2123.86	1973.15
1693.91	2068.42	1925.32
1695.25	2002.65	1876.89
1696.58	1922.81	1835.65
1697.91	1830.86	1806.96
1699.24	1733.53	1792.67
1700.58	1641.39	1795.05
1701.91	1567.75	1813.3
1703.24	1528.32	1840.29
1704.58	1535.08	1866.89
1705.91	1597.18	1893.73
1707.24	1696.57	1927.54
1708.57	1787.75	1975.79
1709.91	1863.93	2047.95
1711.24	1921.15	2149.43
1712.57	1961.01	2284.01
1713.9	1982.59	2438.75
1715.24	1986.88	2585.68
1716.57	1977.9	2714.97
1717.9	1958.47	2823.66
1719.24	1930.74	2905.81
1720.57	1894.99	2958.79
1721.9	1848.7	2980.77
1723.23	1787.42	2972.34
1724.57	1710.89	2934.62
1725.9	1623.16	2871.95
1727.23	1535.32	2788.58
1728.57	1463.52	2690.59
1729.9	1428.93	2586.28
1731.23	1455.47	2486.2
1732.56	1563.37	2394.91
1733.9	1753.72	2315.44
1735.23	1965.21	2251.61
1736.56	2183.62	2209.06
1737.89	2405.37	2190.74
1739.23	2625.52	2190.01
1740.56	2836.56	2191.64
1741.89	3033.17	2189.26
1743.23	3209.85	2180.83
1744.56	3359.85	2159.72
1745.89	3476.56	2124.01
1747.22	3557.15	2074.35
1748.56	3599.57	2016.67
1749.89	3601.02	1958.46
1751.22	3560.4	1913.72
1752.55	3478.8	1894.35
1753.89	3354.97	1912.24
1755.22	3192.97	1974.77
1756.55	3000.1	2088.47
1757.89	2786.77	2252.02
1759.22	2567.98	2451.17
1760.55	2364.13	2657.74
1761.88	2192.26	2862
1763.22	2070.25	3057.28
1764.55	2013.87	3235.94
1765.88	2002.9	3392.62
1767.21	2018.28	3524.49
1768.55	2059.32	3626.01
1769.88	2114.6	3692.39
1771.21	2171.27	3720.85
1772.55	2220.92	3709.55
1773.88	2259.12	3656.66
1775.21	2285.58	3564.53
1776.54	2303.35	3436.98
1777.88	2316.99	3279.78
1779.21	2329.89	3104.07
1780.54	2348.96	2922.51
1781.87	2379.35	2747.86
1783.21	2424.54	2593.25
1784.54	2485.98	2473.46
1785.87	2559.3	2393.62
1787.21	2636.75	2347.05
1788.54	2714.31	2316.54
1789.87	2790.59	2291.46
1791.2	2864.68	2269.92
1792.54	2937	2249.23
1793.87	3006.41	2227.75
1795.2	3072.13	2206.62
1796.53	3130.83	2187.27
1797.87	3172.99	2169.53
1799.2	3186.38	2155
1800.53	3164.53	2145.54
1801.87	3103.13	2142.86
1803.2	2999.56	2149.09
1804.53	2855.8	2158.86
1805.86	2674.41	2170.95
1807.2	2464.57	2192.15
1808.53	2240.97	2231.75
1809.86	2023.42	2298.87
1811.2	1834.44	2393.96
1812.53	1702.26	2516.36
1813.86	1651.33	2664.31
1815.19	1691.68	2832.64
1816.53	1774.55	3014.17
1817.86	1890.38	3197.98
1819.19	2035.32	3374.35
1820.52	2180.41	3537.12
1821.86	2310.92	3681.8
1823.19	2418.5	3802.23
1824.52	2498.67	3892.71
1825.86	2550.56	3950.68
1827.19	2573.5	3971.66
1828.52	2567.78	3953.48
1829.85	2538.24	3896.37
1831.19	2489.52	3803.54
1832.52	2428.13	3678.99
1833.85	2361.27	3533.31
1835.18	2297.13	3378.68
1836.52	2243.45	3229.86
1837.85	2207.19	3108.75
1839.18	2184.32	3036.86
1840.52	2148.94	3030.19
1841.85	2093.95	3102.62
1843.18	2019.46	3220.07
1844.51	1926.92	3331.05
1845.85	1822.74	3433.59
1847.18	1718.62	3519.43
1848.51	1631.69	3583.12
1849.84	1582.94	3616.68
1851.18	1594.04	3614.11
1852.51	1684.33	3568.98
1853.84	1865.47	3481.12
1855.18	2063.43	3350.36
1856.51	2254.85	3182.34
1857.84	2429.26	2985.56
1859.17	2586.23	2773.93
1860.51	2722.53	2564.85
1861.84	2837.06	2377.19
1863.17	2926.67	2228.42
1864.5	2991.48	2133.24
1865.84	3030.93	2097.29
1867.17	3045.3	2076.01
1868.5	3035.06	2060.45
1869.84	3004.45	2047.44
1871.17	2958.15	2036.06
1872.5	2905.2	2018.57
1873.83	2856.53	1990.93
1875.17	2825.94	1950.27
1876.5	2828.95	1899.95
1877.83	2878.82	1846.03
1879.16	2983.12	1798.77
1880.5	3125.38	1769.7
1881.83	3269.31	1773.97
1883.16	3410.15	1821.37
1884.5	3546.31	1907.37
1885.83	3674.37	2026.73
1887.16	3792.07	2171.22
1888.49	3897.85	2315.65
1889.83	3989.6	2455.37
1891.16	4063.8	2585.23
1892.49	4117.83	2702.29
1893.82	4148.43	2801.09
1895.16	4152.35	2878.17
1896.49	4127.01	2927.22
1897.82	4071.81	2946.36
1899.16	3986.29	2933.3
1900.49	3874.39	2887.94
1901.82	3742.25	2808.73
1903.15	3596.19	2698.99
1904.49	3443.62	2562.59
1905.82	3293.66	2406.1
1907.15	3149.58	2238.55
1908.49	3008.49	2070.35
1909.82	2872.95	1913.27
1911.15	2751.71	1787.44
1912.48	2651.92	1710.87
1913.82	2582.88	1695.05
1915.15	2552.38	1734.29
1916.48	2563.22	1777.29
1917.81	2601.17	1820.06
1919.15	2650.52	1861.89
1920.48	2706.49	1903.53
1921.81	2767.29	1940.15
1923.15	2833	1973.52
1924.48	2901.7	2001.27
1925.81	2969.06	2024.79
1927.14	3029.12	2041.93
1928.48	3072.48	2052.98
1929.81	3090.61	2055.59
1931.14	3077.78	2047.29
1932.47	3030.87	2027.44
1933.81	2947.94	1999.7
1935.14	2829.03	1972.92
1936.47	2679.7	1956.68
1937.81	2505.17	1962.04
1939.14	2316.72	1996.02
1940.47	2125.6	2066.45
1941.8	1946.22	2162.51
1943.14	1797.08	2253.7
1944.47	1701.41	2334.78
1945.8	1683.63	2399.47
1947.13	1764.27	2443.4
1948.47	1956.99	2462.9
1949.8	2219.4	2454.36
1951.13	2491	2416.21
1952.47	2771.71	2351.79
1953.8	3051.01	2265.21
1955.13	3323	2163.92
1956.46	3578.42	2056.79
1957.8	3817.08	1954.81
1959.13	4031.06	1871.55
1960.46	4219.21	1822.23
1961.79	4382.68	1815.23
1963.13	4523.11	1849.4
1964.46	4639.99	1906.5
1965.79	4736.69	1956.79
1967.13	4816.17	1992.82
1968.46	4880.76	2014.28
1969.79	4930.91	2018.28
1971.12	4963.17	2007.8
1972.46	4972.93	1986.15
1973.79	4954.04	1957.52
1975.12	4905.74	1923.71
1976.45	4825.71	1891.17
1977.79	4714.02	1867.12
1979.12	4571.9	1859.2
1980.45	4399.45	1869.06
1981.79	4198.1	1896.48
1983.12	3970.94	1931.05
1984.45	3724.67	1963.09
1985.78	3467.09	1989.6
1987.12	3211.5	2011.6
1988.45	2975.56	2026.5
1989.78	2780.3	2030.94
1991.12	2642.61	2025.64
1992.45	2574.59	2009.85
1993.78	2572.03	1986.42
1995.11	2602.16	1955.86
1996.45	2638.75	1925.88
1997.78	2675.35	1900.1
1999.11	2707.67	1888.75
2000.44	2734.19	1902.33
2001.78	2754.34	1946.2
2003.11	2766.74	2015.8
2004.44	2768.36	2083.35
2005.78	2759.68	2143.1
2007.11	2739.51	2192.59
2008.44	2708.72	2227.71
2009.77	2666.45	2243.98
2011.11	2614.2	2238.92
2012.44	2554.11	2212.53
2013.77	2491	2162.14
2015.1	2427.36	2091.43
2016.44	2367.31	2008.9
2017.77	2316.67	1929.03
2019.1	2280.08	1870.67
2020.44	2263.15	1854.16
2021.77	2269.02	1900.35
2023.1	2301.03	2021.83
2024.43	2352.78	2217.61
2025.77	2414.45	2482.98
2027.1	2477.82	2777.22
2028.43	2538.97	3078.91
2029.76	2593.65	3381.55
2031.1	2642.18	3681.94
2032.43	2680.69	3972.09
2033.76	2705.86	4244.45
2035.1	2714.71	4495.87
2036.43	2703.92	4722.79
2037.76	2670.43	4920.07
2039.09	2617.73	5085.5
2040.43	2549.71	5218.92
2041.76	2476.72	5318.71
2043.09	2414.28	5384.25
2044.42	2382.11	5415.18
2045.76	2402.52	5413.18
2047.09	2500.67	5379.43
2048.42	2700.11	5316.23
2049.76	2988.8	5223.76
2051.09	3289.34	5104.67
2052.42	3588.86	4956.63
2053.75	3883.19	4773.97
2055.09	4168.22	4553.89
2056.42	4438.02	4301.34
2057.75	4686.98	4027.76
2059.08	4912.39	3749.93
2060.42	5112.92	3490.76
2061.75	5285.82	3278.87
2063.08	5428.88	3147.58
2064.42	5542.16	3122.97
2065.75	5625.05	3226.98
2067.08	5676.87	3430.32
2068.41	5697.97	3653.86
2069.75	5690.68	3886.24
2071.08	5654.71	4123.31
2072.41	5589.51	4353.47
2073.75	5495	4570.64
2075.08	5372.73	4768.82
2076.41	5223.09	4941.12
2077.74	5050.89	5084.62
2079.08	4856.97	5198.76
2080.41	4643.78	5284.87
2081.74	4415.69	5345.12
2083.07	4179.06	5379.58
2084.41	3939.36	5390.83
2085.74	3703.79	5379.77
2087.07	3480.3	5347.73
2088.41	3271.64	5296.18
2089.74	3086.61	5227.28
2091.07	2938.57	5141.4
2092.4	2839.57	5033.75
2093.74	2800.26	4893.51
2095.07	2829.44	4719.14
2096.4	2934.11	4516.62
2097.73	3094.36	4293.63
2099.07	3273.52	4057.55
2100.4	3451.54	3811.77
2101.73	3615.83	3556.98
2103.07	3762.41	3295.65
2104.4	3886.23	3032.27
2105.73	3984.84	2778.88
2107.06	4054.03	2550.97
2108.4	4091.71	2361.83
2109.73	4094.93	2225.32
2111.06	4060.9	2151.79
2112.39	3989.82	2122.01
2113.73	3884.24	2097
2115.06	3748.41	2075.36
2116.39	3589.08	2058.77
2117.73	3418.01	2050.5
2119.06	3250.62	2047.58
2120.39	3106.82	2046.37
2121.72	3005.87	2041.72
2123.06	2962.37	2031.32
2124.39	2982.99	2012.33
2125.72	3009.33	1983.75
2127.05	3030.56	1942.66
2128.39	3041.93	1899.55
2129.72	3046.48	1870.14
2131.05	3042.83	1873.13
2132.39	3034.92	1924.88
2133.72	3023.79	2038.93
2135.05	3010.98	2205.39
2136.38	2993.06	2370.37
2137.72	2965.17	2520.8
2139.05	2924.97	2652.97
2140.38	2871.38	2756.46
2141.71	2806.75	2825.72
2143.05	2733.73	2859.03
2144.38	2657.05	2848.76
2145.71	2578.62	2792.66
2147.05	2503.7	2692.48
2148.38	2435.07	2556.51
2149.71	2379.15	2396.5
2151.04	2343.74	2227.31
2152.38	2336.15	2066.49
2153.71	2360.23	1940.32
2155.04	2421.31	1878.12
2156.37	2522.61	1904.51
2157.71	2660.75	2036.68
2159.04	2806.59	2292.69
2160.37	2936.97	2624.48
2161.71	3046.47	2991.8
2163.04	3127.35	3381.92
2164.37	3173.1	3781.96
2165.7	3176.97	4184.06
2167.04	3135.61	4587.4
2168.37	3048.18	4988.58
2169.7	2919.48	5381.07
2171.04	2760.67	5760.7
2172.37	2588.34	6127.42
2173.7	2426.26	6476.05
2175.03	2303.01	6801.74
2176.37	2245.34	7101.89
2177.7	2280.48	7374.36
2179.03	2425.07	7617.15
2180.36	2617.52	7826.85
2181.7	2845.68	8003.48
2183.03	3099.67	8143.37
2184.36	3372.04	8244.39
2185.7	3657.27	8304.34
2187.03	3951.45	8323.2
2188.36	4246.98	8299
2189.69	4536.29	8233.3
2191.03	4816.04	8125.78
2192.36	5081.1	7979.29
2193.69	5327.4	7796.94
2195.02	5552.61	7584.98
2196.36	5757.6	7347.48
2197.69	5942.38	7091.25
2199.02	6106.78	6822.47
2200.36	6251.93	6543.01
2201.69	6379.07	6249.83
2203.02	6486.98	5936.92
2204.35	6574.79	5599.25
2205.69	6640.74	5232.27
2207.02	6683.57	4836.64
2208.35	6700.6	4418.88
2209.68	6689.49	3986.22
2211.02	6647.93	3547.89
2212.35	6571.93	3115.97
2213.68	6457.69	2706
2215.02	6301.46	2333.52
2216.35	6101.86	2011.65
2217.68	5860.09	1752.45
2219.01	5577.8	1565.63
2220.35	5258.5	1436.4
2221.68	4908.93	1357.03
2223.01	4541.2	1329.26
2224.34	4171.3	1353.81
2225.68	3815.48	1394.51
2227.01	3495.33	1430.95
2228.34	3233	1470.65
2229.68	3045.62	1526.81
2231.01	2926.62	1615.98
2232.34	2855.95	1754.32
2233.67	2827.37	1958.64
2235.01	2834.21	2218.47
2236.34	2860.01	2511.59
2237.67	2885.5	2804.11
2239	2897.53	3087.17
2240.34	2886.62	3353.65
2241.67	2842.9	3597.14
2243	2760.15	3808.48
2244.34	2636.42	3984.38
2245.67	2475.89	4121.92
2247	2289.25	4216.69
2248.33	2096.95	4265.72
2249.67	1924.61	4270.02
2251	1801.63	4235.78
2252.33	1759.34	4168.73
2253.67	1822.37	4080.9
2255	1995.62	3983.1
2256.33	2193.67	3886.2
2257.66	2394.71	3796.71
2259	2590.05	3714.88
2260.33	2775.22	3641.33
2261.66	2940.77	3573.7
2262.99	3082.98	3506.83
2264.33	3200.99	3434.46
2265.66	3294.47	3351.51
2266.99	3363.59	3258.84
2268.33	3415.34	3161.55
2269.66	3456.23	3063.92
2270.99	3494.4	2970.59
2272.32	3540.14	2891.78
2273.66	3597.85	2830.93
2274.99	3670.49	2794.08
2276.32	3753.85	2788.06
2277.65	3845.44	2813.79
2278.99	3942.72	2874.99
2280.32	4041.64	2971.37
2281.65	4137.41	3090.25
2282.99	4221.07	3220.41
2284.32	4286.63	3354.52
2285.65	4325.2	3484.49
2286.98	4330.75	3602.14
2288.32	4297.15	3702.69
2289.65	4220.09	3779.08
2290.98	4096.14	3823.36
2292.31	3926.09	3828.15
2293.65	3713.41	3788.86
2294.98	3468.62	3701.61
2296.31	3207.99	3566.13
2297.65	2950.5	3388.73
2298.98	2714.84	3180.82
2300.31	2520.64	2960.67
2301.64	2383.68	2755.86
2302.98	2295.99	2595.17
2304.31	2215.87	2507.31
2305.64	2136.45	2521.04
2306.97	2068.92	2657.14
2308.31	2022.63	2844.83
2309.64	2013.24	3042.86
2310.97	2054.31	3248.01
2312.31	2157.49	3450.22
2313.64	2285.38	3645.3
2314.97	2408.55	3832.39
2316.3	2521.42	4007.67
2317.64	2616.17	4174.21
2318.97	2688.92	4334.35
2320.3	2730.55	4490.51
2321.63	2736.66	4644.79
2322.97	2706.2	4802.73
2324.3	2643.66	4962.99
2325.63	2558.53	5118.5
2326.97	2466.1	5260.93
2328.3	2387.32	5388.54
2329.63	2344.77	5497.53
2330.96	2361.83	5583.44
2332.3	2455.68	5645.41
2333.63	2618.67	5679.91
2334.96	2780.55	5684.52
2336.29	2933.72	5657.37
2337.63	3071.74	5598.44
2338.96	3187.34	5507.15
2340.29	3272.64	5385.58
2341.63	3321.67	5240.37
2342.96	3330.19	5079.8
2344.29	3292.16	4915.14
2345.62	3205.61	4761.18
2346.96	3074.21	4629.38
2348.29	2905.8	4529.56
2349.62	2712.14	4467.67
2350.96	2512.14	4410.98
2352.29	2323.25	4343.98
2353.62	2164.17	4259.33
2354.95	2053.01	4150.61
2356.29	2001.64	4011.9
2357.62	1980.61	3841.43
2358.95	1970.89	3642.31
2360.28	1965.18	3420.91
2361.62	1961.24	3188.29
2362.95	1959.14	2959.42
2364.28	1959.27	2752.04
2365.62	1960.29	2582.06
2366.95	1964.37	2458.95
2368.28	1972.29	2378.84
2369.61	1983.68	2321.82
2370.95	1997.38	2273.72
2372.28	2012.81	2230.76
2373.61	2031.25	2195.8
2374.94	2053.95	2174.24
2376.28	2081.85	2171.98
2377.61	2113.05	2190.05
2378.94	2137.55	2225.56
2380.28	2148.86	2275.12
2381.61	2144.15	2338.17
2382.94	2125.46	2410.75
2384.27	2097.35	2483.86
2385.61	2067.09	2543.48
2386.94	2039.85	2584.74
2388.27	2022.97	2604.87
2389.6	2018.7	2602.7
2390.94	2022.52	2580.71
2392.27	2034.68	2542.53
2393.6	2056.09	2495.83
2394.94	2088.33	2452.34
2396.27	2133.13	2424.29
2397.6	2199.74	2417.98
2398.93	2298.35	2431.76
2400.27	2442.02	2456.29
2401.6	2641.42	2489.28
2402.93	2897.47	2527.14
2404.26	3187.48	2568.84
2405.6	3498.11	2616.71
2406.93	3822.88	2676.93
2408.26	4154.68	2756.72
2409.6	4484.46	2866.57
2410.93	4809.01	3012.46
2412.26	5119.43	3184.18
2413.59	5408.43	3353.92
2414.93	5670.69	3514.66
2416.26	5902.39	3664.14
2417.59	6096.74	3795.99
2418.92	6249.31	3903.5
2420.26	6357.53	3981.94
2421.59	6415.81	4030.22
2422.92	6417.94	4047.52
2424.26	6360.29	4035.15
2425.59	6237.96	3993.74
2426.92	6049.83	3926.25
2428.25	5798.07	3836.06
2429.59	5484.34	3726.9
2430.92	5114.51	3603.26
2432.25	4699.98	3471.02
2433.59	4255.7	3337.5
2434.92	3797.97	3208.66
2436.25	3352.35	3090.65
2437.58	2950.92	2991.48
2438.92	2624.18	2913.54
2440.25	2391.15	2860.32
2441.58	2265.34	2838.86
2442.91	2243.6	2857.39
2444.25	2310.83	2921.09
2445.58	2398.14	3009.11
2446.91	2482.26	3081.46
2448.25	2553.83	3133.13
2449.58	2611.57	3163.34
2450.91	2652.35	3167.5
2452.24	2671.14	3145.25
2453.58	2668	3100.44
2454.91	2643.99	3039.34
2456.24	2601.03	2973.1
2457.57	2545.48	2918.25
2458.91	2485.19	2890.41
2460.24	2425.35	2902.86
2461.57	2372.65	2965.81
2462.91	2328.24	3078.37
2464.24	2282.01	3212.14
2465.57	2225.57	3344.58
2466.9	2156.24	3471.73
2468.24	2077.25	3593.4
2469.57	1995.58	3713.45
2470.9	1920.47	3838.83
2472.23	1863.96	3975.61
2473.57	1835.55	4133.92
2474.9	1843.24	4322.07
2476.23	1889.45	4542.14
2477.57	1964.89	4784.22
2478.9	2041.77	5033.58
2480.23	2112.75	5281.77
2481.56	2170.86	5520.91
2482.9	2215.88	5745.63
2484.23	2246.97	5953.98
2485.56	2266.98	6142.26
2486.89	2279.34	6306.93
2488.23	2293.26	6446.77
2489.56	2314.04	6560.11
2490.89	2346.22	6643.88
2492.23	2390.65	6695.76
2493.56	2439.52	6711.8
2494.89	2486.37	6690.93
2496.22	2529.52	6631.5
2497.56	2565.84	6531.21
2498.89	2592.34	6387.58
2500.22	2608.65	6199.99
2501.55	2609.92	5967.03
2502.89	2592.55	5688.61
2504.22	2553.28	5367.19
2505.55	2494.84	5010.69
2506.89	2419.53	4632.59
2508.22	2333.76	4247.46
2509.55	2245.03	3872.59
2510.88	2161.89	3525.33
2512.22	2089.11	3220.43
2513.55	2030.02	2962.75
2514.88	1986.07	2741.57
2516.22	1954.74	2557.32
2517.55	1923.52	2423.81
2518.88	1880.16	2353.57
2520.21	1817.09	2356.32
2521.55	1733.32	2439.03
2522.88	1635.39	2577.15
2524.21	1537.58	2725.12
2525.54	1458.94	2875.49
2526.88	1424.42	3026.76
2528.21	1457.84	3182.28
2529.54	1584.1	3341.13
2530.88	1812.39	3506.47
2532.21	2061.11	3682.49
2533.54	2317.29	3871.55
2534.87	2565.67	4075.04
2536.21	2800.91	4283.99
2537.54	3015.88	4488.01
2538.87	3204.38	4681.34
2540.2	3361.11	4857.95
2541.54	3482.33	5012.99
2542.87	3568.24	5143.73
2544.2	3617.95	5245.01
2545.54	3632.46	5312.8
2546.87	3615.03	5346.9
2548.2	3568.66	5346.5
2549.53	3500.38	5309.97
2550.87	3415.01	5239.76
2552.2	3318.08	5139.37
2553.53	3213.89	5016.99
2554.86	3106.65	4881.83
2556.2	2999.68	4748.39
2557.53	2898.87	4628.72
2558.86	2812.5	4540.56
2560.2	2754.33	4500.13
2561.53	2739.42	4521.42
2562.86	2780.86	4606.75
2564.19	2883.88	4744.04
2565.53	3052.58	4906.52
2566.86	3244.82	5086.72
2568.19	3424.7	5278.07
2569.52	3581.77	5475.15
2570.86	3722.83	5670.75
2572.19	3834.49	5860.03
2573.52	3916.14	6033.59
2574.86	3977.1	6178.67
2576.19	4014.83	6285.14
2577.52	4029.61	6346.93
2578.85	4036.72	6357.69
2580.19	4019.13	6313.1
2581.52	3971.48	6211.29
2582.85	3893.46	6052.1
2584.18	3782.15	5836.41
2585.52	3635.65	5564.49
2586.85	3457.64	5239.43
2588.18	3251.87	4867.12
2589.52	3026.4	4458.5
2590.85	2789.68	4025.39
2592.18	2556.93	3584.41
2593.51	2346.92	3157.43
2594.85	2173.87	2770.13
2596.18	2049.12	2447.34
2597.51	1978.64	2217.23
2598.84	1915.38	2104.3
2600.18	1853.52	2094.74
2601.51	1799.77	2096.39
2602.84	1753.23	2096.71
2604.18	1719.12	2082.95
2605.51	1707.63	2051.9
2606.84	1726.95	2002.69
2608.17	1782.03	1938.12
2609.51	1881.63	1867.83
2610.84	2024.28	1804.37
2612.17	2177.91	1762.01
2613.51	2314.41	1756.68
2614.84	2434.64	1803.02
2616.17	2548.09	1889.6
2617.5	2653.34	1970.89
2618.84	2744.46	2044.71
2620.17	2824.41	2117.56
2621.5	2895.43	2199.21
2622.83	2962.5	2296.58
2624.17	3027.94	2420.44
2625.5	3092.2	2582.12
2626.83	3158.13	2786.44
2628.17	3226.59	2995.61
2629.5	3294.15	3187.56
2630.83	3360.25	3359.58
2632.16	3422.44	3501.2
2633.5	3475.75	3606.78
2634.83	3519.86	3674.01
2636.16	3551.31	3700.73
2637.49	3566.57	3682.54
2638.83	3565.91	3621.02
2640.16	3546.93	3518.69
2641.49	3504.6	3378.47
2642.83	3434.59	3208.18
2644.16	3329.77	3018.31
2645.49	3183.63	2820.51
2646.82	2992.02	2630.72
2648.16	2757.33	2467.04
2649.49	2487.22	2344.03
2650.82	2197.4	2272.16
2652.15	1914.76	2243.9
2653.49	1670.25	2235.87
2654.82	1495.38	2248.58
2656.15	1425.77	2286.5
2657.49	1477.31	2351.39
2658.82	1627.18	2444.76
2660.15	1887.98	2568.72
[truncated: 2,504 more rows]
