# Supplementary material for: Ionogel thin films as a compatibilizing pretreatment for electrospray deposition
Source: Royal Society of Chemistry journal article supplement (doi:10.1039/d5lp00359h), 2026-01-01
Supplement: d5lp00359h1.zip [file Coat Thickness Data in microns.xlsx]

## Sheet: PS Coat Thickness
Sample	0.10	0.11	0.12	0.26	0.70	2.15	2.62
	μm	μm	μm	μm	μm	μm	μm
	"Sample" - Film thickness in microns
	0.0750019	0.0771171	0.0106664	0.000275276	0.00294461	0.0841021	-0.00919675
	0.0742201	0.0967257	0.0122284	0.000302715	0.00263804	0.0829126	-0.00854224
	0.0735843	0.110602	0.014407	0.00041647	0.00214913	0.0817778	-0.00745624
	0.0747369	0.120935	0.0171997	0.000612526	0.00210817	0.0821267	-0.00769485
	0.0758954	0.126745	0.0201933	0.000565269	0.00215109	0.0830251	-0.00870512
	0.0775835	0.12913	0.0226086	0.000575193	0.00213737	0.08336	-0.00975551
	0.0787019	0.122682	0.0247876	0.000771254	0.0021731	0.0828945	-0.0105356
	0.0799212	0.12173	0.0243802	0.000713579	0.00236958	0.0830957	-0.0118338
	0.0792777	0.129668	0.0211243	0.000521237	0.00214268	0.0837952	-0.0128057
	0.0761616	0.143607	0.0233024	0.00064833	0.00209962	0.0842219	-0.0133807
	0.0772167	0.15859	0.0291427	0.000738087	0.00212182	0.0851382	-0.0137884
	0.0805037	0.171541	0.0375065	0.000790769	0.00220739	0.0871324	-0.014036
	0.0818491	0.173252	0.0491271	0.000997613	0.00191256	0.0899626	-0.0141532
	0.0815271	0.166135	0.0640836	0.000920492	0.00192847	0.0940636	-0.0145635
	0.0765794	0.162274	0.0814014	0.00130759	0.0018374	0.0991172	-0.0146658
	0.0721607	0.159822	0.100387	0.00134638	0.00202002	0.104658	-0.0149791
	0.0670667	0.163562	0.115802	0.0014524	0.00204234	0.109609	-0.0145676
	0.0652823	0.156237	0.120287	0.00149514	0.00208187	0.111346	-0.0140121
	0.0641057	0.146317	0.115425	0.00171549	0.00213677	0.109505	-0.0130498
	0.0637853	0.148369	0.107203	0.00166416	0.00233007	0.105171	-0.0127469
	0.0644371	0.152058	0.101011	0.00151263	0.00208995	0.099963	-0.0131994
	0.0654245	0.160079	0.108827	0.00151729	0.00228729	0.0949262	-0.0136597
	0.0661589	0.163539	0.121261	0.00137601	0.00230802	0.091386	-0.0134187
	0.0632487	0.169655	0.124066	0.00122174	0.00232892	0.0871999	-0.0125625
	0.060682	0.167936	0.120407	0.00113497	0.00228672	0.0823793	-0.011881
	0.0591885	0.163349	0.115419	0.00125933	0.00230735	0.0783325	-0.0109285
	0.0589179	0.171373	0.116073	0.00128978	0.00233079	0.0744355	-0.00966601
	0.0588514	0.179549	0.132945	0.00141004	0.00235508	0.073333	-0.00923753
	0.0593907	0.171281	0.164279	0.00155593	0.00237786	0.0734762	-0.0090208
	0.0595971	0.162112	0.203036	0.00159533	0.00239831	0.0743874	-0.00711189
	0.0584131	0.15544	0.242884	0.00152212	0.00229268	0.0756595	-0.00344967
	0.0581589	0.145579	0.272218	0.00171672	0.00225575	0.0761885	0.00224633
	0.0574808	0.144698	0.289214	0.00174704	0.00223975	0.0781046	0.0111685
	0.0560748	0.139805	0.294827	0.00185571	0.00244412	0.0810963	0.0247665
	0.0553723	0.135183	0.288848	0.00197999	0.00243428	0.0851468	0.0441575
	0.0546165	0.138021	0.273472	0.00224042	0.00264134	0.0896656	0.070091
	0.0542118	0.142423	0.252369	0.00206306	0.00287711	0.0957591	0.101661
	0.0550947	0.146371	0.230337	0.00225352	0.00293752	0.102708	0.138906
	0.055961	0.151238	0.210393	0.00206977	0.00286997	0.110919	0.177702
	0.0574065	0.15882	0.194938	0.00219351	0.00298715	0.120173	0.210658
	0.0595652	0.161616	0.194446	0.00238304	0.00310786	0.129298	0.23416
	0.0622422	0.159334	0.204474	0.00249962	0.0031036	0.134621	0.245339
	0.0652865	0.161083	0.210547	0.00208581	0.00291177	0.137835	0.246553
	0.0677097	0.166802	0.215346	0.00214129	0.00298276	0.13633	0.239031
	0.0662884	0.177195	0.221591	0.00212493	0.00333512	0.131393	0.223351
	0.0609659	0.18724	0.231815	0.00203274	0.00346143	0.128836	0.207773
	0.0600336	0.189596	0.240567	0.00205825	0.00333927	0.12781	0.193806
	0.0594062	0.182166	0.24349	0.00177229	0.00340194	0.128152	0.18372
	0.0602798	0.168845	0.243585	0.00168577	0.00359355	0.130953	0.175179
	0.0621725	0.162679	0.245245	0.00188696	0.00359304	0.13521	0.168681
	0.0623361	0.16003	0.253016	0.00206909	0.00351463	0.13972	0.162486
	0.0617079	0.161887	0.265833	0.00215622	0.00348863	0.144267	0.156457
	0.0603341	0.167777	0.284707	0.00232635	0.00346385	0.149318	0.152201
	0.0596365	0.176937	0.310945	0.00213487	0.00332321	0.151844	0.14791
	0.0589343	0.187313	0.340826	0.00239498	0.00358045	0.149514	0.142714
	0.0585388	0.196637	0.363531	0.00243079	0.00361947	0.144525	0.132028
	0.0600797	0.194467	0.368854	0.00254634	0.00380619	0.138316	0.117938
	0.0638934	0.194845	0.351943	0.0026195	0.00376361	0.131087	0.104746
	0.0675529	0.200639	0.316867	0.00283807	0.00386101	0.124083	0.0910178
	0.0707077	0.21981	0.267419	0.00282536	0.00391326	0.12023	0.0797263
	0.0746022	0.235991	0.214412	0.00307859	0.00416439	0.116449	0.0706102
	0.0764648	0.251351	0.171973	0.00316478	0.00416582	0.114047	0.0637726
	0.0779881	0.270754	0.14122	0.00320192	0.00427623	0.113092	0.0584814
	0.077459	0.287328	0.130146	0.00325669	0.00411679	0.112205	0.0559574
	0.0766526	0.294393	0.129711	0.00358671	0.0039988	0.111359	0.0577876
	0.0755843	0.294293	0.138637	0.00368962	0.00400109	0.111057	0.0648727
	0.0766177	0.28712	0.15843	0.00380128	0.00407415	0.111093	0.0782384
	0.0777398	0.281495	0.190316	0.0039199	0.00390752	0.111573	0.0985074
	0.079749	0.262427	0.233966	0.003979	0.00413067	0.112416	0.126838
	0.0797372	0.233273	0.286421	0.00403678	0.00412529	0.114567	0.160269
	0.0797825	0.212445	0.332446	0.00421686	0.00425471	0.117831	0.19198
	0.079443	0.20583	0.371213	0.00420046	0.00420413	0.123299	0.221736
	0.0791715	0.208644	0.402943	0.00416524	0.00421784	0.13116	0.253632
	0.0812248	0.221106	0.428848	0.00424078	0.00430093	0.140942	0.295113
	0.083097	0.234998	0.448979	0.00418088	0.0042653	0.151492	0.347221
	0.0833363	0.242848	0.463589	0.00405039	0.00423308	0.161716	0.405583
	0.0817489	0.248958	0.462162	0.00405149	0.00426925	0.16662	0.473498
	0.0804309	0.246433	0.440784	0.00420183	0.00443644	0.168058	0.55404
	0.0803469	0.234974	0.397026	0.00419479	0.00453873	0.169889	0.648808
	0.0815811	0.230618	0.340324	0.00428032	0.00431072	0.170815	0.760304
	0.0826665	0.232888	0.283679	0.00459092	0.00425192	0.170947	0.895564
	0.0852628	0.240542	0.247872	0.00468382	0.00419284	0.170471	1.0504
	0.0902394	0.25206	0.245487	0.0046683	0.00414356	0.171553	1.21341
	0.0966177	0.251902	0.264812	0.00485616	0.00424112	0.174084	1.38393
	0.104673	0.247661	0.292691	0.00505962	0.00430637	0.176765	1.55472
	0.11167	0.243335	0.319879	0.00520299	0.00446511	0.180498	1.72561
	0.115807	0.24465	0.34549	0.00508466	0.00434025	0.184883	1.90686
	0.121417	0.248496	0.371906	0.00526688	0.00455555	0.189929	2.09494
	0.126263	0.248494	0.39076	0.00513285	0.00486788	0.194162	2.28173
	0.131043	0.253112	0.400184	0.00511945	0.00494659	0.198498	2.45984
	0.134992	0.251594	0.393222	0.00517879	0.00489779	0.203127	2.6295
	0.138681	0.24959	0.375884	0.00525219	0.00503424	0.207826	2.79923
	0.144104	0.242822	0.356031	0.00558765	0.00492187	0.211873	2.97109
	0.148854	0.241983	0.343806	0.00548531	0.00506069	0.216065	3.14709
	0.154759	0.241077	0.333243	0.00530104	0.00514748	0.222212	3.32133
	0.162549	0.245799	0.319847	0.00542158	0.00517673	0.229764	3.47937
	0.170363	0.244692	0.312969	0.00548187	0.00521074	0.238309	3.62238
	0.180715	0.245126	0.316505	0.00534911	0.00525284	0.246431	3.75541
	0.192147	0.24499	0.322647	0.00527278	0.00530683	0.251923	3.89023
	0.203158	0.241082	0.318186	0.00545014	0.00537709	0.253551	4.02263
	0.212271	0.245775	0.294866	0.00537799	0.00553097	0.254022	4.16029
	0.223007	0.255895	0.259328	0.00542037	0.00545639	0.254864	4.29277
	0.236715	0.262038	0.222949	0.00532988	0.00559122	0.257478	4.41375
	0.251002	0.268911	0.200605	0.00530013	0.00575404	0.25919	4.52572
	0.267066	0.283134	0.208978	0.0051711	0.00606135	0.264759	4.63526
	0.284204	0.300541	0.239723	0.00537386	0.00612186	0.270986	4.7317
	0.301882	0.30929	0.285382	0.005508	0.00616773	0.27846	4.80245
	0.322064	0.310743	0.33811	0.0062904	0.00594661	0.286537	4.85092
	0.342381	0.323891	0.397728	0.00733532	0.00596637	0.291326	4.8946
	0.363611	0.334123	0.460404	0.00952124	0.00586825	0.294365	4.94949
	0.385165	0.346136	0.512519	0.0129997	0.00628796	0.291571	5.00856
	0.408511	0.368926	0.546969	0.0181885	0.00636696	0.289433	5.05626
	0.434858	0.375986	0.566149	0.0253345	0.00630198	0.287658	5.0873
	0.46226	0.365175	0.572752	0.0347964	0.00642032	0.284286	5.10984
	0.487409	0.357212	0.576224	0.0465033	0.00689232	0.282286	5.12907
	0.514459	0.344281	0.585988	0.0600586	0.00808834	0.281406	5.14897
	0.541738	0.329567	0.614049	0.072258	0.010411	0.280598	5.16478
	0.571128	0.320287	0.659411	0.0813544	0.0145821	0.27934	5.1754
	0.601457	0.321559	0.711694	0.0872451	0.0220551	0.277253	5.18743
	0.631751	0.311899	0.742182	0.0894239	0.0342997	0.276283	5.20616
	0.661519	0.293496	0.744848	0.0878642	0.0536568	0.278221	5.22018
	0.68798	0.285325	0.720051	0.0826128	0.0824371	0.284092	5.23334
	0.717677	0.282004	0.672846	0.0742957	0.122597	0.292394	5.25282
	0.747392	0.285093	0.612021	0.0632743	0.175167	0.300613	5.26309
	0.775303	0.288015	0.550007	0.0506216	0.24083	0.307299	5.26004
	0.803659	0.301519	0.503523	0.0390034	0.31401	0.315148	5.24604
	0.834912	0.310954	0.489009	0.0307045	0.380752	0.321798	5.22342
	0.868632	0.316855	0.520205	0.0264966	0.439157	0.326233	5.19962
	0.906225	0.323983	0.562547	0.0228063	0.489372	0.331886	5.18847
	0.945042	0.332208	0.60402	0.0197487	0.529931	0.343226	5.17515
	0.984116	0.332059	0.641275	0.0174188	0.561118	0.355901	5.16596
	1.02409	0.337564	0.674167	0.0153433	0.584308	0.36456	5.15849
	1.07032	0.351091	0.701831	0.013824	0.600397	0.368665	5.14244
	1.11366	0.369216	0.72463	0.012348	0.610712	0.377246	5.12037
	1.15826	0.391347	0.740332	0.0111538	0.616736	0.386465	5.09866
	1.20776	0.425196	0.750753	0.0103841	0.622026	0.387053	5.07498
	1.25568	0.464116	0.763706	0.00968642	0.628782	0.380312	5.06015
	1.30185	0.50355	0.783068	0.00902042	0.640204	0.373101	5.05449
	1.34758	0.539592	0.795481	0.00880143	0.648733	0.368438	5.05153
	1.39615	0.570729	0.795537	0.00851193	0.65865	0.371479	5.055
	1.44319	0.599993	0.783499	0.00818585	0.675065	0.384605	5.05719
	1.48359	0.620699	0.765568	0.00793741	0.702642	0.406188	5.05773
	1.52809	0.641373	0.753944	0.00795513	0.743834	0.433257	5.05284
	1.57315	0.662891	0.761828	0.00786191	0.794338	0.458979	5.04448
	1.61575	0.683876	0.787152	0.00789891	0.845496	0.477739	5.03961
	1.65267	0.713626	0.819489	0.00806631	0.896074	0.482067	5.0338
	1.68839	0.744048	0.85263	0.00804206	0.945957	0.477818	5.01744
	1.726	0.767888	0.874954	0.00831693	0.991342	0.484955	4.98817
	1.75616	0.799323	0.88988	0.00838586	1.02822	0.50541	4.95334
	1.78605	0.841674	0.902258	0.00867054	1.0579	0.522585	4.9237
	1.81793	0.886611	0.918057	0.00860029	1.0815	0.538598	4.90578
	1.84857	0.932896	0.933813	0.00891721	1.10074	0.553337	4.89594
	1.87873	0.980835	0.953941	0.00881319	1.11791	0.559129	4.88825
	1.90582	1.02786	0.973252	0.00890797	1.13428	0.562679	4.87691
	1.93007	1.06951	0.989781	0.00909259	1.14581	0.572518	4.86696
	1.95238	1.11205	1.00417	0.00936859	1.15182	0.581227	4.85482
	1.96886	1.15846	1.01455	0.00935096	1.15334	0.589488	4.83542
	1.97471	1.20631	1.01324	0.00959122	1.1513	0.613454	4.81274
	1.9856	1.25302	0.998419	0.00971152	1.14541	0.644109	4.7831
	1.99937	1.30184	0.971846	0.00988226	1.13653	0.667066	4.75642
	2.01647	1.35656	0.940663	0.00977915	1.12649	0.688817	4.73132
	2.03006	1.41372	0.913593	0.0097713	1.11501	0.715119	4.70487
	2.0465	1.47592	0.902715	0.00968337	1.10144	0.73862	4.67831
	2.06322	1.54988	0.91597	0.00946337	1.08617	0.764987	4.64823
	2.08093	1.61961	0.944307	0.0097608	1.06923	0.79911	4.62028
	2.09602	1.66864	0.979041	0.00971907	1.04787	0.82796	4.60322
	2.11079	1.71391	1.01492	0.00970802	1.0212	0.858637	4.59647
	2.13486	1.75029	1.04383	0.0100538	0.990206	0.892178	4.60962
	2.16072	1.78699	1.06473	0.0102563	0.956377	0.930129	4.63209
	2.18027	1.81937	1.07959	0.0103571	0.919522	0.971582	4.65221
	2.19866	1.84782	1.09236	0.0106592	0.882008	1.01335	4.66773
	2.21728	1.87774	1.10798	0.0105278	0.8474	1.06214	4.6757
	2.2379	1.91283	1.13143	0.0106416	0.819366	1.1157	4.67796
	2.24863	1.95491	1.16177	0.0106378	0.801236	1.16886	4.67418
	2.26378	2.00856	1.1948	0.0109592	0.794291	1.21744	4.65946
	2.27971	2.06599	1.22481	0.0108611	0.795592	1.25586	4.63136
	2.29517	2.12696	1.24643	0.0110969	0.799649	1.29275	4.60004
	2.3097	2.184	1.26129	0.0111285	0.803948	1.33013	4.56576
	2.32269	2.24232	1.27396	0.0113442	0.806659	1.3658	4.52775
	2.33128	2.30251	1.28803	0.0114509	0.807546	1.40408	4.5049
	2.34024	2.35961	1.3012	0.0120817	0.81003	1.44381	4.48569
	2.35481	2.42428	1.30045	0.0126045	0.818831	1.48614	4.45643
	2.3688	2.48265	1.28448	0.0130996	0.839612	1.52337	4.42818
	2.38292	2.54114	1.25822	0.0133343	0.878459	1.56131	4.40296
	2.40541	2.59176	1.2272	0.0133306	0.931853	1.60642	4.38381
	2.42865	2.63517	1.2014	0.0132581	0.991655	1.65026	4.37248
	2.44454	2.67759	1.19036	0.0131827	1.04871	1.69167	4.36554
	2.45638	2.7157	1.19161	0.0130562	1.10088	1.7347	4.36066
	2.47123	2.75607	1.19276	0.0128404	1.14651	1.78105	4.34335
	2.48936	2.79843	1.19536	0.012697	1.18371	1.83521	4.31768
	2.50979	2.83518	1.19808	0.0129921	1.21334	1.89348	4.29293
	2.52812	2.8718	1.20142	0.0132211	1.23455	1.95824	4.26385
	2.54728	2.91116	1.20142	0.013577	1.24893	2.02051	4.22224
	2.5588	2.94367	1.19529	0.0143745	1.25844	2.07894	4.16711
	2.57756	2.97468	1.18701	0.0156227	1.26655	2.13964	4.11012
	2.59587	3.00938	1.18221	0.0175333	1.27618	2.20105	4.05896
	2.61876	3.03993	1.18476	0.0205941	1.28977	2.26849	4.02866
	2.64838	3.05291	1.20067	0.0250994	1.30163	2.34368	4.00846
	2.68166	3.06011	1.2293	0.0315685	1.30551	2.42741	3.9881
	2.71093	3.06224	1.26851	0.040263	1.30191	2.52043	3.96592
	2.74129	3.06677	1.31273	0.0514962	1.29258	2.62726	3.94943
	2.77198	3.08564	1.36075	0.0644002	1.2799	2.75665	3.92706
	2.80453	3.10006	1.41291	0.0770622	1.26523	2.89628	3.89965
	2.83984	3.0905	1.46008	0.0854807	1.24949	3.04261	3.87378
	2.87326	3.08116	1.49712	0.0890731	1.2293	3.19379	3.85309
	2.90668	3.0782	1.51752	0.0888296	1.19987	3.34486	3.83979
	2.94257	3.07423	1.52159	0.0848528	1.16054	3.4966	3.82591
	2.97624	3.07465	1.51172	0.0766113	1.11381	3.64501	3.81105
	3.01146	3.08704	1.49135	0.066179	1.06488	3.796	3.80558
	3.04083	3.10387	1.46694	0.0554038	1.02065	3.9489	3.80522
	3.06444	3.12599	1.44795	0.0465826	0.989409	4.09521	3.80926
	3.08101	3.15832	1.44191	0.041692	0.975612	4.23328	3.82901
	3.09805	3.18844	1.45067	0.0377722	0.970578	4.37178	3.86893
	3.11353	3.21483	1.47741	0.0340471	0.975202	4.51137	3.91957
	3.12883	3.22982	1.52292	0.0308204	0.992195	4.66072	3.96856
	3.14315	3.24264	1.57816	0.0282896	1.02104	4.81486	3.99927
	3.15342	3.26335	1.62859	0.0261729	1.05292	4.96335	4.01773
	3.17075	3.27897	1.67297	0.0244764	1.07706	5.09887	4.02323
	3.18897	3.29159	1.71534	0.0232758	1.09464	5.21711	4.01697
	3.21526	3.29752	1.75952	0.022409	1.10399	5.31643	3.99353
	3.24527	3.29872	1.80885	0.0222256	1.10367	5.40318	3.95734
	3.27722	3.29346	1.8565	0.0222029	1.09077	5.4806	3.89856
	3.30985	3.28619	1.88603	0.0229267	1.06551	5.54711	3.81084
	3.3429	3.28299	1.8986	0.0242198	1.0291	5.60896	3.71785
	3.36895	3.27267	1.89901	0.0260397	0.984624	5.66418	3.63443
	3.39189	3.26828	1.89174	0.0277954	0.934748	5.70885	3.55006
	3.40445	3.27664	1.87187	0.0293677	0.884717	5.74391	3.44321
	3.41003	3.29252	1.83361	0.0301473	0.839317	5.76908	3.3215
	3.40777	3.30569	1.77756	0.0311899	0.80334	5.78489	3.19096
	3.39565	3.31224	1.70875	0.0319719	0.780538	5.79392	3.04794
	3.38051	3.31124	1.63343	0.0327738	0.771967	5.79287	2.90785
	3.36953	3.29531	1.55472	0.0338296	0.767045	5.7878	2.79263
	3.35017	3.26936	1.47913	0.0345555	0.763431	5.78035	2.72172
	3.33227	3.25287	1.41679	0.035054	0.762213	5.76373	2.72687
	3.3188	3.24928	1.37804	0.0352244	0.764464	5.73763	2.80074
	3.3201	3.24881	1.36831	0.0355388	0.771102	5.69848	2.92465
	3.32734	3.25575	1.38517	0.0361966	0.783221	5.63905	3.09917
	3.34089	3.26186	1.41682	0.0377759	0.802178	5.56762	3.29225
	3.35662	3.27674	1.45331	0.0405265	0.822974	5.48948	3.46827
	3.36324	3.29233	1.49149	0.0448434	0.846611	5.41326	3.63699
	3.36159	3.32676	1.53192	0.0518688	0.87564	5.33966	3.78807
	3.35808	3.37268	1.5792	0.0628438	0.911509	5.28165	3.92023
	3.35618	3.42712	1.63843	0.0790917	0.954018	5.223	4.04006
	3.35799	3.49256	1.70988	0.101557	0.999886	5.16372	4.15104
	3.36	3.56895	1.77601	0.131378	1.04748	5.10572	4.25967
	3.36831	3.65766	1.83274	0.168426	1.0957	5.0529	4.38202
	3.37049	3.75734	1.88028	0.209845	1.13983	4.99965	4.52067
	3.3743	3.84154	1.91984	0.247709	1.1728	4.95064	4.68223
	3.38345	3.9024	1.95646	0.281314	1.19262	4.9081	4.87841
	3.39401	3.94142	1.98486	0.311996	1.19743	4.86301	5.12174
	3.39548	3.96752	2.00308	0.339052	1.18434	4.81752	5.4155
	3.39615	3.97787	2.01381	0.364137	1.15385	4.78185	5.73062
	3.39224	3.9839	2.0155	0.387097	1.10819	4.75023	6.01779
	3.38595	3.97095	1.99496	0.408407	1.05162	4.7197	6.26617
	3.38125	3.92838	1.94851	0.427953	0.98793	4.67845	6.48593
	3.38082	3.86555	1.88357	0.44561	0.921874	4.6291	6.67851
	3.38552	3.80049	1.80996	0.453882	0.858944	4.5769	6.85716
	3.40077	3.72263	1.74121	0.450384	0.805005	4.52714	7.02962
	3.41799	3.64761	1.69223	0.437408	0.762372	4.48019	7.20111
	3.43049	3.59054	1.67305	0.416759	0.723597	4.42774	7.3632
	3.44308	3.54905	1.6806	0.389423	0.688042	4.37383	7.50354
	3.45246	3.52185	1.72213	0.356752	0.659762	4.32544	7.60838
	3.45376	3.51196	1.80322	0.320232	0.641333	4.28132	7.67797
	3.44636	3.51672	1.89286	0.28297	0.636269	4.23859	7.72264
	3.44177	3.51985	1.9877	0.248784	0.648312	4.19876	7.7396
	3.44617	3.53262	2.08988	0.214136	0.677404	4.16169	7.73086
	3.45031	3.54776	2.20233	0.17972	0.709948	4.12798	7.71694
	3.44722	3.55365	2.31119	0.148127	0.745364	4.09684	7.71123
	3.45131	3.55769	2.40384	0.121489	0.783597	4.06729	7.74116
	3.45981	3.57385	2.48279	0.103511	0.825636	4.03966	7.80797
	3.47555	3.59681	2.55201	0.0899543	0.869984	4.01484	7.91257
	3.48872	3.62198	2.61585	0.0784342	0.915821	3.99208	8.01587
	3.48968	3.64991	2.68049	0.0686831	0.961188	3.97178	8.13961
	3.49009	3.67908	2.75518	0.0604186	1.00275	3.95552	8.29698
	3.47837	3.69335	2.84452	0.0539559	1.03982	3.93721	8.51263
	3.46625	3.68935	2.93085	0.0484789	1.07212	3.91721	8.77118
	3.45981	3.68538	3.00636	0.0436035	1.10132	3.8961	9.0241
	3.46078	3.67169	3.07103	0.0401185	1.13	3.87847	9.25823
	3.46426	3.65061	3.11998	0.0372272	1.15839	3.85938	9.47206
	3.47568	3.62947	3.15159	0.034817	1.18643	3.84042	9.65652
	3.49764	3.60647	3.16202	0.0330019	1.21248	3.8265	9.81572
	3.51725	3.5865	3.14736	0.0315084	1.235	3.81234	9.95383
	3.53152	3.58003	3.10911	0.0304507	1.25036	3.79574	10.1
	3.54575	3.58031	3.05209	0.0303316	1.25779	3.77601	10.2719
	3.55918	3.60506	2.98195	0.0311599	1.25833	3.75772	10.4796
	3.56099	3.63692	2.88626	0.0333841	1.25324	3.74303	10.7251
	3.56046	3.67465	2.75241	0.038615	1.24436	3.73306	11.0223
	3.56295	3.71858	2.58865	0.0483393	1.23401	3.72216	11.3357
	3.56427	3.76862	2.40323	0.0632679	1.22154	3.71057	11.666
	3.56635	3.81977	2.20734	0.0857872	1.20455	3.69759	11.9718
	3.56344	3.86542	2.01638	0.117915	1.18083	3.68469	12.2108
	3.56194	3.89903	1.84656	0.160683	1.15047	3.67293	12.3764
	3.55473	3.92311	1.71848	0.215448	1.11657	3.66356	12.4654
	3.53907	3.94941	1.65223	0.276728	1.08437	3.65679	12.4816
	3.5213	3.97885	1.66473	0.338761	1.05994	3.64905	12.4252
	3.5072	4.00612	1.73532	0.40246	1.04756	3.63871	12.3077
	3.49584	4.0264	1.83645	0.467774	1.05236	3.62746	12.1532
	3.48538	4.04802	1.94302	0.533282	1.06846	3.61839	11.9909
	3.47277	4.07022	2.04083	0.595879	1.09153	3.61092	11.8198
	3.46244	4.08024	2.13125	0.649703	1.12036	3.60379	11.6213
	3.45424	4.08213	2.21289	0.694771	1.1491	3.59675	11.4048
	3.44657	4.07528	2.27954	0.73033	1.17259	3.58421	11.1796
	3.44293	4.06159	2.3276	0.75555	1.18732	3.56727	10.9434
	3.44277	4.04648	2.35759	0.770065	1.19428	3.54835	10.7171
	3.44527	4.03233	2.36724	0.772395	1.19543	3.52831	10.527
	3.44804	4.0103	2.35731	0.762149	1.19216	3.50848	10.417
	3.45666	3.98531	2.32947	0.73888	1.18816	3.48752	10.4205
	3.46476	3.97703	2.28899	0.70233	1.18588	3.46622	10.4925
	3.47319	3.97695	2.23494	0.65276	1.18786	3.44572	10.5525
	3.48573	3.96851	2.15888	0.592286	1.19428	3.42769	10.6356
	3.4937	3.94986	2.06553	0.52276	1.20177	3.41429	10.7128
	3.49857	3.93047	1.96321	0.447663	1.2077	3.40335	10.7742
	3.50389	3.92082	1.86121	0.372987	1.2091	3.39506	10.8213
	3.51181	3.91503	1.75502	0.304684	1.20313	3.39112	10.8485
	3.51919	3.90856	1.64291	0.249009	1.18503	3.39303	10.8567
	3.52704	3.90994	1.53844	0.214058	1.15223	3.40048	10.8476
	3.53795	3.92524	1.45372	0.201438	1.104	3.41106	10.8191
	3.54626	3.97035	1.39358	0.199478	1.04286	3.41665	10.7863
	3.55738	4.02942	1.35878	0.206598	0.970965	3.41819	10.7712
	3.56866	4.07795	1.35859	0.223206	0.893404	3.41713	10.7921
	3.58251	4.13038	1.40563	0.239623	0.817222	3.41807	10.8644
	3.60213	4.19797	1.51088	0.255125	0.750901	3.42144	10.9553
	3.62102	4.26402	1.67141	0.268373	0.702112	3.42894	11.0409
	3.62938	4.33103	1.83845	0.27729	0.673741	3.43992	11.1163
	3.62954	4.39539	2.00868	0.281167	0.655715	3.45434	11.1622
	3.63068	4.46806	2.17605	0.2791	0.646243	3.47239	11.172
	3.63429	4.53672	2.33081	0.27011	0.640007	3.49258	11.1364
	3.64377	4.59099	2.46762	0.254325	0.636687	3.51169	11.0403
	3.65906	4.64096	2.58516	0.232363	0.636206	3.52508	10.8826
	3.66776	4.68226	2.68512	0.205091	0.641196	3.53027	10.6625
	3.6734	4.71812	2.76954	0.174721	0.652755	3.52256	10.3787
	3.67391	4.74129	2.84503	0.143442	0.672748	3.49966	10.0378
	3.66953	4.76477	2.91732	0.114475	0.703434	3.45581	9.66362
	3.65989	4.78669	2.97713	0.0906338	0.744788	3.38941	9.29029
	3.64481	4.79758	3.01553	0.0762193	0.795403	3.30516	8.98161
	3.63162	4.79444	3.03452	0.0662065	0.853119	3.20824	8.73364
	3.62494	4.78131	3.0374	0.05877	0.906017	3.10345	8.46295
	3.625	4.74871	3.02808	0.0538636	0.949292	2.99496	8.23536
	3.62615	4.69977	3.00711	0.0524078	0.980271	2.89073	8.10667
	3.63558	4.63437	2.97179	0.0555805	0.997965	2.79872	8.02581
	3.65023	4.56129	2.92391	0.0644201	1.00218	2.73566	7.93596
	3.65689	4.49298	2.86404	0.0803348	0.994876	2.68694	7.91834
	3.65763	4.42858	2.78884	0.104466	0.977473	2.65117	7.92543
	3.65523	4.36995	2.69289	0.137988	0.952513	2.62743	8.02466
	3.64894	4.30911	2.57578	0.181294	0.923661	2.61635	8.20862
	3.64563	4.24465	2.43962	0.229652	0.892996	2.62169	8.50902
	3.64951	4.18909	2.28671	0.276209	0.861768	2.64514	8.84682
	3.65859	4.14426	2.12256	0.320512	0.822305	2.6863	9.1756
	3.66781	4.09351	1.9556	0.362291	0.77784	2.74671	9.4833
	3.67487	4.03522	1.79959	0.400539	0.735948	2.81883	9.76996
	3.68001	3.98411	1.66259	0.435604	0.706815	2.90481	10.0258
	3.68337	3.9487	1.55569	0.467831	0.694453	3.01024	10.2565
	3.67967	3.93333	1.49166	0.497092	0.693425	3.13848	10.4414
	3.68092	3.91916	1.46966	0.524398	0.707465	3.27848	10.5698
	3.68133	3.89497	1.4763	0.550981	0.737441	3.41531	10.6327
	3.68123	3.87617	1.50495	0.577685	0.780872	3.54529	10.6272
	3.68294	3.85474	1.54685	0.604416	0.824945	3.66821	10.5614
	3.68235	3.83231	1.58078	0.631498	0.867044	3.78363	10.44
	3.68001	3.81359	1.6058	0.653806	0.905192	3.89073	10.2761
	3.66973	3.79697	1.62473	0.666708	0.938449	3.98773	10.1043
	3.66223	3.78253	1.64396	0.671404	0.965893	4.07835	9.93234
	3.67027	3.7739	1.67096	0.668809	0.983857	4.16545	9.75142
	3.687	3.78552	1.71509	0.660819	0.990596	4.25411	9.54745
	3.70016	3.79984	1.7824	0.648545	0.986666	4.3443	9.31857
	3.71573	3.81992	1.87649	0.634096	0.975401	4.43075	9.07928
	3.72586	3.83974	1.9934	0.618902	0.960666	4.51528	8.83626
	3.73154	3.85258	2.11993	0.604275	0.94528	4.60411	8.60633
	3.73211	3.85554	2.25142	0.591684	0.932189	4.69877	8.43207
	3.73418	3.85508	2.38719	0.581513	0.923337	4.79392	8.38949
	3.73636	3.85808	2.52768	0.572907	0.922101	4.88885	8.36502
	3.74328	3.85972	2.67036	0.564601	0.927346	4.97614	8.3229
	3.75227	3.86204	2.80814	0.55626	0.942742	5.0533	8.34468
	3.76497	3.87276	2.93316	0.546598	0.965698	5.12617	8.45765
	3.77794	3.88896	3.04218	0.534626	0.992336	5.20048	8.50166
	3.78509	3.90968	3.13106	0.519073	1.01457	5.28016	8.49694
	3.78688	3.9159	3.19952	0.49969	1.02779	5.36805	8.53377
	3.78527	3.91982	3.24839	0.478685	1.02957	5.47296	8.52472
	3.77316	3.91279	3.28071	0.458796	1.02064	5.60651	8.49931
	3.75835	3.89546	3.29745	0.442932	1.00036	5.77428	8.5163
	3.74324	3.87133	3.30104	0.424264	0.970385	5.97207	8.51534
	3.72436	3.84311	3.29042	0.401248	0.933761	6.19604	8.51156
	3.71598	3.82061	3.26471	0.373081	0.893472	6.44666	8.49902
	3.71592	3.80354	3.2212	0.339516	0.855272	6.6947	8.52244
	3.71326	3.80178	3.15723	0.301102	0.82284	6.92764	8.57962
	3.71479	3.81782	3.06885	0.25932	0.801826	7.13898	8.66994
	3.71788	3.83379	2.95517	0.216305	0.796593	7.32365	8.7885
	3.72402	3.86715	2.81665	0.175443	0.807809	7.47988	8.9471
	3.73147	3.90625	2.65815	0.141238	0.824197	7.59684	9.09876
	3.73627	3.94864	2.48843	0.118679	0.842037	7.66089	9.24115
	3.73864	4.00416	2.31484	0.109852	0.859792	7.65718	9.35721
	3.7469	4.07367	2.12694	0.109069	0.8747	7.58377	9.46483
	3.75461	4.13944	1.93429	0.118386	0.885801	7.44131	9.57815
	3.76673	4.18788	1.75649	0.140079	0.891461	7.24705	9.71627
	3.77347	4.21391	1.61588	0.177055	0.889074	7.02757	9.82072
	3.76815	4.22438	1.53548	0.230293	0.8781	6.82156	9.88091
	3.75854	4.25204	1.53405	0.300826	0.860433	6.64779	9.88853
	3.74709	4.26055	1.6115	0.381444	0.839368	6.4861	9.83405
	3.74211	4.25657	1.71429	0.464293	0.820869	6.3427	9.71516
	3.73664	4.23619	1.83685	0.541383	0.804201	6.22548	9.53767
	3.7279	4.20654	1.97291	0.611223	0.79196	6.12782	9.30829
	3.72385	4.16153	2.1128	0.672182	0.786243	6.04068	9.04148
	3.72096	4.11314	2.25099	0.722882	0.787857	5.9648	8.77576
	3.72048	4.06088	2.38159	0.762168	0.796595	5.90057	8.54862
	3.72014	4.0256	2.502	0.789329	0.811754	5.84449	8.36229
	3.71978	3.99518	2.61266	0.802797	0.824592	5.79258	8.20231
	3.72151	3.96125	2.71168	0.801557	0.834924	5.74402	8.07681
	3.71957	3.92788	2.79729	0.785533	0.841891	5.70075	8.0172
	3.72088	3.91022	2.86792	0.753076	0.845248	5.6618	7.98753
	3.73166	3.90902	2.92345	0.704997	0.846713	5.62144	7.98697
	3.74159	3.90469	2.96043	0.641495	0.850469	5.57588	7.99383
	3.7502	3.89202	2.97595	0.565651	0.862422	5.52391	8.00649
	3.75915	3.8903	2.97175	0.480979	0.886384	5.4702	8.03787
	3.76445	3.89627	2.95188	0.393906	0.913816	5.41952	8.09272
	3.76773	3.89262	2.92096	0.311555	0.943265	5.38027	8.18113
	3.76911	3.88202	2.88351	0.242891	0.974953	5.3563	8.30298
	3.7685	3.8691	2.84189	0.197315	1.01123	5.34135	8.45138
	3.76791	3.83419	2.79876	0.170234	1.05526	5.33287	8.60993
	3.76162	3.79317	2.75745	0.149172	1.1067	5.32893	8.75076
	3.75492	3.74334	2.72162	0.13595	1.16573	5.32765	8.87195
	3.75375	3.70032	2.69212	0.131929	1.23044	5.32724	8.9778
	3.75481	3.6717	2.66609	0.137525	1.28756	5.32805	9.07458
	3.75044	3.66041	2.6408	0.153607	1.33308	5.33237	9.16903
	3.74643	3.65372	2.61128	0.179991	1.36451	5.33908	9.26069
	3.74165	3.65532	2.57623	0.215889	1.38479	5.34695	9.35869
	3.73536	3.65287	2.53602	0.25363	1.39382	5.36043	9.47782
	3.73787	3.6557	2.49155	0.286365	1.39316	5.38003	9.61728
	3.74234	3.65762	2.4441	0.315086	1.38492	5.40319	9.74575
	3.74276	3.66225	2.39437	0.339815	1.37224	5.43479	9.85218
	3.74156	3.69122	2.33666	0.361005	1.35673	5.47443	9.93909
	3.74083	3.73525	2.27016	0.380445	1.33945	5.5204	9.99812
	3.74192	3.79958	2.19603	0.399586	1.32179	5.57883	10.0068
	3.74231	3.88555	2.11803	0.420279	1.30178	5.65468	9.96766
	3.74799	3.97549	2.03808	0.444227	1.27567	5.74511	9.88247
	3.75245	4.0568	1.95915	0.472213	1.23966	5.84622	9.76042
	3.75388	4.12138	1.87704	0.502185	1.19509	5.96352	9.62111
	3.75738	4.18965	1.79013	0.527683	1.14616	6.1006	9.48489
	3.77047	4.24245	1.70137	0.547055	1.10013	6.24618	9.37609
	3.78322	4.2881	1.61717	0.559611	1.06603	6.3905	9.3207
	3.80053	4.33119	1.54202	0.564725	1.04551	6.53476	9.34311
	3.82102	4.37607	1.47661	0.561266	1.0291	6.68197	9.31918
	3.83972	4.41812	1.41551	0.548008	1.0219	6.83748	9.28034
	3.85779	4.44707	1.36287	0.524555	1.02679	7.00553	9.28038
	3.87677	4.46297	1.32329	0.490928	1.04811	7.17894	9.23001
	3.89236	4.46251	1.29981	0.447639	1.08702	7.3534	9.18145
	3.90452	4.43898	1.2873	0.396951	1.12765	7.5181	9.16974
	3.91379	4.3913	1.279	0.342505	1.16912	7.66544	9.12475
	3.91659	4.32575	1.27378	0.288805	1.20836	7.79153	9.10132
	3.91284	4.2587	1.27398	0.242321	1.24354	7.89402	9.05992
	3.90818	4.20612	1.2824	0.203864	1.27355	7.96749	9.0326
	3.90136	4.17837	1.29947	0.175997	1.3001	8.00373	9.02492
	3.89354	4.18004	1.3209	0.164757	1.32397	8.0061	9.04132
	3.88399	4.20855	1.34344	0.173235	1.35011	7.97666	9.08859
	3.88048	4.25477	1.3661	0.195822	1.382	7.92134	9.14643
	3.88929	4.30311	1.38888	0.234314	1.42397	7.84575	9.22014
	3.90722	4.34722	1.41306	0.289479	1.47751	7.76329	9.31634
	3.92862	4.39117	1.43911	0.356902	1.54129	7.68975	9.4101
	3.96331	4.43015	1.46988	0.427264	1.61316	7.63964	9.4802
	4.01372	4.46983	1.50645	0.492594	1.69154	7.62304	9.52147
	4.07929	4.50379	1.5452	0.549377	1.77177	7.62668	9.53928
	4.15523	4.53613	1.58211	0.597271	1.84844	7.63894	9.53844
	4.24084	4.55812	1.6168	0.636141	1.92085	7.6527	9.50261
	4.32595	4.55999	1.64822	0.667254	1.98699	7.66749	9.42079
	4.39375	4.5415	1.67387	0.690695	2.0454	7.68453	9.28651
	4.44672	4.50495	1.69133	0.707589	2.09467	7.70616	9.10322
	4.48391	4.44999	1.70019	0.719616	2.13592	7.72946	8.88747
	4.51085	4.37951	1.69986	0.727935	2.16958	7.75103	8.66527
	4.51851	4.30456	1.69423	0.73379	2.19402	7.77119	8.46177
	4.50698	4.23958	1.68777	0.73844	2.21308	7.78895	8.29411
	4.47603	4.1866	1.68332	0.743092	2.2273	7.80455	8.19173
	4.4308	4.14655	1.68169	0.747821	2.23983	7.81798	8.17408
	4.37808	4.11309	1.67204	0.752778	2.25196	7.8247	8.19861
	4.31554	4.07461	1.65256	0.757406	2.25857	7.82058	8.23586
	4.24863	4.03821	1.62614	0.76106	2.25651	7.80721	8.28161
	4.18107	4.01149	1.59933	0.762634	2.24121	7.78179	8.33684
	4.11845	3.99263	1.58017	0.761599	2.21145	7.74133	8.3913
	4.05748	3.98943	1.57839	0.757902	2.16735	7.69038	8.41641
	4.00633	3.99625	1.60063	0.751021	2.11038	7.6344	8.37783
	3.96674	3.99033	1.65008	0.741701	2.04264	7.57801	8.27173
	3.93963	3.98399	1.72271	0.730998	1.9676	7.5248	8.10308
	3.92077	3.9633	1.81418	0.719757	1.89089	7.47935	7.88255
	3.90727	3.94298	1.925	0.71015	1.81848	7.44331	7.6181
	3.89756	3.92361	2.04992	0.703498	1.75911	7.41496	7.32247
	3.88027	3.91477	2.18119	0.701225	1.71731	7.39515	6.98238
	3.86408	3.90351	2.31286	0.702982	1.69637	7.38275	6.61294
	3.84912	3.88782	2.44092	0.707583	1.69659	7.37595	6.19322
	3.83736	3.8874	2.56427	0.70982	1.71214	7.37154	5.77024
	3.82932	3.88701	2.67974	0.706578	1.7374	7.36475	5.4069
	3.82017	3.88796	2.78171	0.695036	1.76928	7.35203	5.12431
	3.8106	3.89153	2.85825	0.672887	1.80591	7.33371	4.86489
	3.80539	3.89255	2.90206	0.639051	1.84509	7.30816	4.71559
	3.80648	3.89192	2.90772	0.594135	1.88484	7.26934	4.60417
	3.8054	3.88317	2.87345	0.539174	1.92327	7.21642	4.49809
	3.80323	3.8679	2.80023	0.477816	1.95743	7.15025	4.48549
	3.80715	3.84739	2.69212	0.414234	1.9854	7.07467	4.50837
	3.81449	3.82841	2.55514	0.355251	2.00827	7.00046	4.62011
	3.82568	3.81508	2.40154	0.308188	2.02698	6.93622	4.82644
	3.83029	3.80445	2.24409	0.275298	2.04071	6.88736	5.08356
	3.82772	3.79548	2.09598	0.253094	2.0496	6.84221	5.37504
	3.82708	3.78733	1.9707	0.245174	2.05341	6.80128	5.69376
	3.82951	3.80719	1.87916	0.253353	2.05245	6.75906	6.01394
	3.82924	3.844	1.83315	0.27722	2.04742	6.71385	6.30972
	3.83516	3.88364	1.84741	0.315662	2.03818	6.66332	6.57267
	3.84688	3.93322	1.9291	0.363924	2.02454	6.60933	6.79917
	3.86047	3.98164	2.02946	0.415879	2.00697	6.55458	6.97991
	3.87263	4.0256	2.14446	0.463734	1.98414	6.49924	7.11002
	3.8857	4.07951	2.27094	0.505562	1.9551	6.44393	7.19396
	3.8938	4.14265	2.40205	0.54062	1.91999	6.38896	7.24271
	3.89906	4.21923	2.53473	0.569092	1.87881	6.33503	7.26055
	3.89581	4.31204	2.66745	0.591705	1.82946	6.2842	7.25219
	3.87661	4.4086	2.79828	0.60839	1.77402	6.23989	7.22259
	3.85165	4.49608	2.92582	0.619182	1.71398	6.19956	7.16813
	3.82654	4.57143	3.04974	0.625618	1.65003	6.16206	7.10743
	3.8004	4.62707	3.16687	0.628467	1.58427	6.13707	7.06221
	3.78292	4.65812	3.27356	0.629442	1.52157	6.12543	7.05671
	3.76986	4.67096	3.3693	0.629898	1.46398	6.12842	7.11128
	3.76354	4.68004	3.45296	0.631694	1.41291	6.14477	7.198
	3.75576	4.68218	3.52324	0.636487	1.36815	6.17894	7.28745
	3.74632	4.65546	3.58011	0.645685	1.32937	6.22099	7.3577
	3.73903	4.61084	3.62611	0.654438	1.29654	6.26343	7.40977
	3.7371	4.54985	3.66033	0.660658	1.26964	6.30609	7.44135
	3.74068	4.48266	3.67465	0.66385	1.24931	6.34875	7.4408
	3.7501	4.40627	3.6682	0.663201	1.23713	6.39126	7.41428
	3.76602	4.3203	3.64231	0.659463	1.23778	6.43284	7.35832
	3.78513	4.24139	3.59687	0.653238	1.25297	6.46797	7.27087
	3.80453	4.16196	3.53424	0.645088	1.28174	6.49334	7.16412
	3.82324	4.08998	3.45639	0.636002	1.3215	6.50815	7.0737
	3.84053	4.01267	3.36461	0.627273	1.36545	6.51272	6.99495
	3.85482	3.93354	3.25987	0.618998	1.40875	6.50618	6.89513
	3.86448	3.86604	3.14087	0.612027	1.44713	6.48625	6.78785
	3.86354	3.80405	3.00359	0.605942	1.47884	6.45471	6.67674
	3.85023	3.77374	2.84525	0.60053	1.50546	6.40971	6.55485
	3.82724	3.76345	2.66628	0.595009	1.52656	6.34971	6.42218
	3.79835	3.75484	2.46777	0.588536	1.54303	6.27787	6.28995
	3.77318	3.76039	2.25321	0.580007	1.5549	6.19629	6.16035
	3.7569	3.77979	2.02669	0.56975	1.56404	6.10851	6.0192
	3.7469	3.81198	1.79617	0.555015	1.57084	6.02747	5.86808
	3.74445	3.85398	1.57365	0.536974	1.57914	5.95484	5.72732
	3.75074	3.88642	1.37298	0.516187	1.58844	5.88785	5.61517
	3.7488	3.90664	1.20959	0.493977	1.60023	5.82609	5.53901
	3.75399	3.9233	1.09827	0.472351	1.61528	5.77296	5.51288
	3.76972	3.93677	1.04292	0.454646	1.63637	5.73283	5.54294
	3.78682	3.93978	1.02862	0.443681	1.66257	5.71052	5.6152
	3.80284	3.92732	1.04952	0.443469	1.69308	5.70399	5.71376
	3.81917	3.93774	1.09751	0.452784	1.72517	5.71378	5.84193
	3.8357	3.95106	1.16388	0.468168	1.75839	5.7427	5.98511
	3.84893	3.95931	1.24899	0.488372	1.79207	5.78567	6.10695
	3.85276	3.96385	1.35381	0.511981	1.82667	5.83264	6.20216
	3.85266	3.95593	1.45635	0.53755	1.86082	5.8757	6.27381
	3.85151	3.93581	1.55143	0.56544	1.89353	5.90753	6.32109
	3.84055	3.91528	1.63769	0.594821	1.92342	5.92464	6.32691
	3.81949	3.89206	1.71428	0.62473	1.94937	5.92357	6.29455
	3.79395	3.86118	1.78202	0.656043	1.96903	5.90789	6.23122
	3.76545	3.83286	1.84198	0.688126	1.98185	5.88168	6.14485
	3.74224	3.80587	1.8954	0.72042	1.98702	5.84518	6.04846
	3.72918	3.78262	1.94245	0.747499	1.98379	5.80361	5.96414
	3.72958	3.761	1.98166	0.769901	1.97359	5.76654	5.90592
	3.73933	3.73455	2.01067	0.784904	1.95775	5.73505	5.86535
	3.75159	3.69875	2.02714	0.790706	1.93799	5.70829	5.85387
	3.76572	3.65926	2.03005	0.788069	1.91544	5.68152	5.87758
	3.7755	3.61885	2.01773	0.779029	1.89375	5.65328	5.94149
	3.7823	3.58732	1.99099	0.765833	1.87467	5.62568	6.05485
	3.78339	3.56663	1.9533	0.751373	1.86003	5.5963	6.17204
	3.7818	3.56977	1.91195	0.737225	1.8512	5.56626	6.28303
	3.78028	3.5806	1.8749	0.725833	1.85158	5.5375	6.38345
	3.77806	3.60397	1.84715	0.717787	1.8585	5.50964	6.45841
	3.77234	3.63962	1.83238	0.713397	1.87133	5.48543	6.49656
	3.76043	3.69283	1.8361	0.711651	1.88975	5.46782	6.50254
	3.74574	3.75623	1.85906	0.711449	1.91377	5.45553	6.47605
	3.72856	3.84091	1.8972	0.71132	1.94193	5.45669	6.42927
	3.71275	3.93513	1.9384	0.709774	1.97482	5.46757	6.3718
	3.71014	4.03431	1.97537	0.706314	2.0136	5.4865	6.31189
	3.70816	4.13374	2.00266	0.700693	2.05729	5.50464	6.24617
	3.71191	4.24449	2.01656	0.693964	2.10301	5.51522	6.1831
	3.71897	4.34534	2.0166	0.686762	2.14917	5.51503	6.13736
	3.72201	4.4385	2.00352	0.680719	2.194	5.49946	6.11478
	3.73385	4.52528	1.97937	0.677408	2.23465	5.46648	6.12177
	3.74609	4.59762	1.94822	0.67714	2.26969	5.41979	6.17294
	3.7554	4.65146	1.91813	0.679273	2.29895	5.36272	6.28597
	3.76265	4.68296	1.90017	0.68308	2.32113	5.30084	6.42235
	3.7727	4.70076	1.9031	0.686435	2.33397	5.24253	6.57724
	3.78038	4.71007	1.92513	0.688743	2.33809	5.19112	6.7389
	3.78231	4.71032	1.96873	0.689131	2.33453	5.14942	6.90182
	3.78175	4.68928	2.03426	0.68693	2.32496	5.12771	7.04317
	3.77665	4.64563	2.1199	0.681262	2.31113	5.12213	7.1446
	3.7695	4.57491	2.21123	0.671882	2.29528	5.12575	7.20508
	3.76165	4.4899	2.30049	0.658439	2.27775	5.1334	7.21766
	3.75138	4.39871	2.38532	0.641054	2.25839	5.14477	7.18454
	3.74277	4.31942	2.46649	0.62047	2.23547	5.16308	7.11909
	3.72736	4.23652	2.54455	0.598607	2.20641	5.19094	7.03656
	3.7111	4.15155	2.61945	0.577776	2.16891	5.23152	6.94541
	3.69691	4.07861	2.68993	0.561317	2.12375	5.27312	6.85098
	3.68182	4.02073	2.75749	0.552062	2.0696	5.31894	6.76446
	3.66491	3.97124	2.82647	0.552438	2.00857	5.37282	6.68558
	3.65001	3.94347	2.89979	0.563737	1.94303	5.42865	6.59414
	3.64042	3.93713	2.97539	0.581389	1.87721	5.48218	6.46923
	3.63893	3.9361	3.04667	0.606479	1.81469	5.53247	6.29633
	3.64172	3.93452	3.11142	0.638391	1.75781	5.57408	6.07666
	3.64899	3.92482	3.17019	0.671755	1.71025	5.59943	5.83318
	3.66131	3.89817	3.22548	0.7004	1.67484	5.60724	5.58905
	3.67651	3.86553	3.27873	0.724194	1.65375	5.5975	5.36806
	3.69353	3.82553	3.32789	0.742738	1.64986	5.57307	5.1839
	3.70769	3.79233	3.36375	0.755996	1.66239	5.54233	5.02621
	3.71464	3.77594	3.381	0.764284	1.6889	5.5077	4.91005
	3.72251	3.77076	3.37647	0.768832	1.7258	5.47668	4.86108
	3.72609	3.78084	3.34987	0.770285	1.76776	5.4486	4.88619
	3.72814	3.79891	3.30261	0.769084	1.81228	5.42663	4.9936
	3.72554	3.81979	3.23805	0.766141	1.85638	5.40487	5.17506
	3.7137	3.83921	3.15958	0.762023	1.89924	5.38625	5.4351
	3.70648	3.85784	3.07225	0.756742	1.93911	5.37333	5.72803
	3.69976	3.87488	2.9816	0.751099	1.97593	5.36318	5.98497
	3.69331	3.87299	2.8951	0.74454	2.00878	5.35208	6.18474
	3.68559	3.86483	2.82134	0.737315	2.03856	5.3371	6.31678
	3.68393	3.84486	2.75627	0.729449	2.06299	5.32006	6.37514
	3.68695	3.81721	2.68611	0.721228	2.08351	5.30265	6.3622
	3.69519	3.7968	2.61581	0.712684	2.1018	5.28425	6.2882
	3.70321	3.78783	2.55385	0.703462	2.11748	5.2644	6.17144
	3.71467	3.80113	2.51014	0.693211	2.12998	5.24342	6.02936
	3.72034	3.82309	2.49456	0.682225	2.14116	5.21957	5.89733
	3.7202	3.84094	2.51523	0.669772	2.15206	5.1933	5.7922
	3.72121	3.8577	2.57022	0.656427	2.16418	5.16835	5.68739
	3.72467	3.87247	2.64718	0.642315	2.17755	5.14617	5.5842
	3.72843	3.88135	2.74434	0.629334	2.19389	5.12883	5.47823
	3.7349	3.88956	2.85874	0.619209	2.2137	5.11603	5.38006
	3.7421	3.90951	2.98611	0.614163	2.23723	5.10592	5.30382
	3.74905	3.95293	3.12596	0.615048	2.26479	5.09991	5.23721
	3.75453	4.02459	3.27675	0.621267	2.29541	5.09636	5.17294
	3.75246	4.10803	3.42854	0.632547	2.33035	5.0967	5.10806
	3.74875	4.20442	3.56755	0.648834	2.36988	5.09685	5.04691
	3.7385	4.29843	3.68628	0.668874	2.41319	5.09376	4.99039
	3.72474	4.39157	3.77794	0.691564	2.45713	5.08934	4.95112
	3.70918	4.46831	3.83656	0.715352	2.49791	5.08497	4.95175
	3.69543	4.52842	3.85942	0.737116	2.53122	5.0835	4.97203
	3.68659	4.57922	3.84312	0.754213	2.55593	5.08688	5.02543
	3.6821	4.61087	3.7869	0.763761	2.56921	5.09834	5.08108
	3.68889	4.63798	3.69377	0.764147	2.57069	5.11809	5.13184
	3.70005	4.67207	3.56945	0.754467	2.56084	5.13961	5.15393
	3.71799	4.71925	3.42138	0.736324	2.53931	5.15814	5.15512
	3.74061	4.76821	3.25919	0.711694	2.50594	5.17757	5.14342
	3.7603	4.80314	3.09288	0.683947	2.46344	5.202	5.12505
	3.7812	4.82522	2.93534	0.658143	2.41181	5.22948	5.10601
	3.79972	4.82796	2.79989	0.640877	2.35316	5.25926	5.07736
	3.81972	4.815	2.68691	0.632273	2.29029	5.29492	5.05264
	3.84403	4.79174	2.59316	0.627574	2.22573	5.33656	5.04984
	3.86691	4.76597	2.51873	0.629411	2.16133	5.38122	5.09108
	3.8882	4.72146	2.46639	0.64063	2.09935	5.42782	5.18837
	3.90419	4.66804	2.4389	0.662871	2.04166	5.4714	5.34873
	3.91178	4.61531	2.44733	0.698245	1.98793	5.50649	5.56446
	3.90678	4.56076	2.48389	0.7433	1.93764	5.52665	5.81703
	3.89144	4.51735	2.52846	0.791551	1.89343	5.53084	6.08537
	3.8721	4.47548	2.58014	0.840224	1.85694	5.51891	6.34805
	3.85399	4.44004	2.64435	0.888083	1.82743	5.49332	6.59834
	3.8387	4.39824	2.72354	0.933107	1.8067	5.45764	6.83134
	3.8257	4.35374	2.81582	0.974734	1.79242	5.41334	7.03702
	3.81911	4.29466	2.92085	1.01189	1.78634	5.36295	7.20121
	3.817	4.24081	3.03887	1.04431	1.79002	5.30987	7.3303
	3.81109	4.19496	3.16466	1.07145	1.80556	5.26288	7.42827
	3.79978	4.16534	3.28509	1.0927	1.83331	5.23146	7.49775
	3.78749	4.14074	3.39896	1.10759	1.87334	5.21193	7.52704
	3.77536	4.11354	3.50205	1.11642	1.91478	5.19935	7.5128
	3.76201	4.07401	3.58881	1.11948	1.95286	5.19456	7.45209
	3.75027	4.02411	3.6554	1.11694	1.98434	5.19524	7.35789
	3.74176	3.95841	3.69968	1.11074	2.00903	5.19432	7.23559
	3.73989	3.89072	3.71962	1.10201	2.02521	5.19276	7.1167
	3.74441	3.83364	3.716	1.0923	2.03318	5.19423	7.04126
	3.75325	3.78327	3.69199	1.08254	2.03255	5.19722	6.99659
	3.77235	3.74696	3.65016	1.0735	2.0255	5.2005	7.01018
	3.79623	3.72026	3.59449	1.06531	2.01255	5.20441	7.05457
	3.82134	3.68906	3.53218	1.05778	1.99645	5.2124	7.08271
	3.85102	3.65542	3.4701	1.05092	1.97884	5.22488	7.05612
	3.87091	3.62727	3.41763	1.04544	1.96298	5.24499	6.9771
	3.88688	3.61094	3.38347	1.04129	1.95153	5.26909	6.85136
	3.89225	3.60906	3.36898	1.03906	1.94829	5.29295	6.69786
	3.88917	3.60749	3.37033	1.03883	1.9557	5.31488	6.54192
	3.87342	3.61388	3.38361	1.03991	1.97594	5.33581	6.43569
	3.84587	3.62084	3.40088	1.04034	2.00693	5.35684	6.42348
	3.81608	3.62604	3.40942	1.03757	2.04591	5.3717	6.38481
	3.78184	3.63596	3.39856	1.0299	2.0899	5.37689	6.3936
	3.75039	3.64836	3.36074	1.01643	2.13572	5.37074	6.46804
	3.73836	3.67336	3.29226	0.996822	2.17952	5.35474	6.54615
	3.73148	3.70851	3.19412	0.97356	2.21862	5.33544	6.69045
	3.72941	3.74911	3.07079	0.949204	2.25401	5.31407	6.85623
	3.73143	3.79452	2.93117	0.927548	2.28281	5.28786	7.02403
	3.73288	3.82919	2.78863	0.913267	2.30544	5.25841	7.17195
	3.73323	3.8503	2.6604	0.910415	2.3232	5.22767	7.28235
	3.72959	3.86111	2.56293	0.922353	2.33579	5.20301	7.35455
	3.72121	3.85294	2.51342	0.948622	2.34458	5.19352	7.39103
	3.71376	3.82892	2.51198	0.982304	2.35157	5.20316	7.39897
	3.71269	3.80404	2.52655	1.02212	2.35767	5.22599	7.38506
	3.71405	3.77711	2.55675	1.06556	2.36424	5.25155	7.34769
	3.70909	3.7541	2.60131	1.10345	2.3721	5.28061	7.28139
	3.7028	3.74675	2.65904	1.13339	2.3825	5.31343	7.17485
	3.69069	3.74382	2.72955	1.15656	2.39538	5.34574	7.02269
	3.67813	3.72913	2.80183	1.17169	2.41044	5.37922	6.84601
	3.6672	3.70838	2.85904	1.17863	2.43012	5.40736	6.67224
	3.66305	3.68076	2.89637	1.17814	2.45301	5.43196	6.52612
	3.65977	3.65285	2.91054	1.17045	2.48039	5.44856	6.43533
	3.66081	3.62449	2.90211	1.15624	2.51053	5.45832	6.40593
	3.6647	3.61143	2.87322	1.13714	2.54384	5.46544	6.44836
	3.67317	3.60693	2.82933	1.11561	2.57754	5.47302	6.55246
	3.68357	3.60404	2.77819	1.09331	2.61002	5.4848	6.66712
	3.69545	3.5857	2.7301	1.07307	2.63853	5.50599	6.78721
	3.70887	3.55715	2.69403	1.05637	2.66228	5.53685	6.9157
	3.72077	3.53014	2.67807	1.04521	2.68029	5.5648	7.05011
	3.73127	3.50605	2.68629	1.04012	2.69102	5.58497	7.16646
	3.7432	3.49251	2.69023	1.04083	2.6924	5.59285	7.25193
	3.74995	3.49431	2.68986	1.04536	2.68497	5.58496	7.30409
	3.75345	3.49668	2.69172	1.05141	2.66787	5.56178	7.33057
	3.74977	3.50031	2.6994	1.0553	2.63974	5.52902	7.34036
	3.74134	3.50495	2.71896	1.05488	2.60108	5.49181	7.33894
	3.73447	3.511	2.74556	1.04911	2.55325	5.46533	7.32896
	3.72172	3.51395	2.7608	1.03764	2.4981	5.45906	7.31207
	3.7091	3.51877	2.76299	1.02148	2.43704	5.46381	7.29291
	3.69673	3.51747	2.75368	1.00247	2.37246	5.47812	7.27752
	3.68508	3.51564	2.73385	0.9834	2.30747	5.49514	7.24973
	3.67994	3.507	2.70738	0.966581	2.24597	5.50809	7.21124
	3.68438	3.50049	2.67566	0.955208	2.19036	5.51482	7.17417
	3.69612	3.49363	2.64433	0.945914	2.14402	5.51399	7.15337
	3.71676	3.49096	2.61703	0.939339	2.10911	5.50615	7.16733
	3.73838	3.48714	2.59885	0.933289	2.08613	5.49033	7.21993
	3.76473	3.47753	2.59407	0.926586	2.07569	5.46521	7.26486
	3.78925	3.47199	2.60604	0.918288	2.07878	5.43131	7.29926
	3.81454	3.4841	2.63531	0.908343	2.09489	5.39048	7.3286
	3.83541	3.51148	2.67818	0.897265	2.12234	5.34838	7.35543
	3.8431	3.55747	2.72737	0.885957	2.15958	5.30903	7.37783
	3.83408	3.61952	2.77596	0.875412	2.20443	5.27408	7.39473
	3.81504	3.68488	2.81918	0.866383	2.25211	5.24386	7.40707
	3.79219	3.7494	2.85181	0.858365	2.30044	5.21968	7.42189
	3.76408	3.81754	2.86876	0.850849	2.3483	5.19836	7.43672
	3.74388	3.88608	2.86935	0.843276	2.39516	5.17931	7.44812
	3.7395	3.96311	2.8561	0.836636	2.43865	5.16433	7.45758
	3.74094	4.05452	2.8304	0.832507	2.47874	5.15384	7.465
	3.74416	4.15136	2.79607	0.831766	2.51401	5.14983	7.47128
	3.73543	4.24833	2.75747	0.83537	2.54432	5.15086	7.4823
	3.72516	4.3384	2.71955	0.843474	2.56714	5.15598	7.49085
	3.71896	4.41769	2.68503	0.85525	2.58227	5.1663	7.49698
	3.71198	4.47082	2.65589	0.869722	2.58747	5.18445	7.48974
	3.7038	4.50311	2.63147	0.885069	2.58304	5.21301	7.46101
	3.69337	4.51414	2.61278	0.899888	2.56743	5.24729	7.42274
	3.68648	4.50615	2.59836	0.914143	2.54193	5.2849	7.38055
	3.67865	4.48039	2.57997	0.927714	2.50684	5.32213	7.33495
	3.66676	4.44266	2.55188	0.940234	2.4641	5.35517	7.28968
	3.65143	4.38951	2.51717	0.9517	2.41797	5.3781	7.24643
	3.6398	4.31547	2.47831	0.960475	2.37179	5.39079	7.20349
	3.62598	4.22972	2.43654	0.965793	2.32955	5.39676	7.16297
	3.61159	4.1333	2.39487	0.966621	2.29466	5.40057	7.12731
	3.59775	4.0217	2.35888	0.963116	2.2708	5.4008	7.10323
	3.58821	3.92388	2.33376	0.957272	2.2573	5.39805	7.09426
	3.58184	3.86129	2.32467	0.950587	2.25327	5.39307	7.10826
	3.57842	3.82558	2.33455	0.945549	2.25543	5.38377	7.1385
	3.57759	3.80652	2.36272	0.943014	2.26198	5.37001	7.17097
	3.58097	3.80949	2.40246	0.943174	2.27068	5.35027	7.19498
	3.58881	3.8109	2.4507	0.946622	2.27914	5.32526	7.21252
	3.60011	3.81	2.50634	0.953037	2.28624	5.29642	7.22985
	3.61865	3.80695	2.56558	0.960422	2.292	5.26555	7.2338
	3.64286	3.80461	2.62615	0.967708	2.29475	5.23332	7.2279
	3.66469	3.7993	2.68696	0.974585	2.29544	5.20116	7.22045
	3.68392	3.80413	2.74535	0.980437	2.2926	5.1693	7.21653
	3.68651	3.81263	2.79502	0.984688	2.28724	5.1412	7.23285
	3.68104	3.81503	2.8332	0.986931	2.27845	5.11985	7.28661
	3.66696	3.80637	2.85884	0.985986	2.26778	5.10503	7.37718
	3.65088	3.79594	2.87448	0.982191	2.25505	5.09748	7.49871
	3.63508	3.78719	2.88332	0.975324	2.24217	5.09569	7.61268
	3.62763	3.77188	2.8895	0.966524	2.22971	5.10078	7.70033
	3.62192	3.75436	2.89478	0.956565	2.21823	5.11348	7.75606
	3.61109	3.7433	2.89895	0.946744	2.20935	5.13342	7.78413
	3.60476	3.73818	2.8966	0.938753	2.20446	5.15835	7.79405
	3.60291	3.73315	2.87958	0.933759	2.20387	5.18901	7.79072
	3.60249	3.72901	2.84364	0.932029	2.20859	5.22398	7.77594
	3.60028	3.72984	2.78655	0.932465	2.21898	5.26284	7.74649
	3.59988	3.72668	2.70557	0.935921	2.23403	5.30836	7.69938
	3.60061	3.71748	2.60056	0.942843	2.2527	5.35736	7.61947
	3.60384	3.70325	2.47533	0.953475	2.27431	5.40561	7.50152
	3.60677	3.66711	2.33698	0.967895	2.29712	5.45047	7.33452
	3.61125	3.62125	2.19784	0.983503	2.31677	5.48364	7.10956
	3.61371	3.57484	2.07186	0.999418	2.3331	5.50934	6.8205
	3.61136	3.53124	1.97464	1.01408	2.34413	5.52692	6.46745
	3.60697	3.50049	1.92042	1.02671	2.34852	5.53997	6.06864
	3.60483	3.47716	1.92133	1.03647	2.3437	5.5504	5.65057
	3.60507	3.45705	1.97384	1.04363	2.3297	5.55924	5.25521
	3.6059	3.45264	2.06521	1.04796	2.30502	5.57118	4.90554
	3.61345	3.45972	2.16806	1.0498	2.27154	5.58656	4.62864
	3.63428	3.47869	2.27229	1.04993	2.22983	5.60263	4.44591
	3.66303	3.5024	2.37239	1.04879	2.18242	5.61642	4.35193
	3.69611	3.53349	2.46307	1.04698	2.13063	5.63111	4.29631
	3.72277	3.5756	2.54141	1.04453	2.07922	5.64456	4.29932
	3.74378	3.62176	2.60613	1.04139	2.03135	5.64984	4.36401
	3.75584	3.65573	2.65744	1.03857	1.99296	5.65063	4.50329
	3.75266	3.67326	2.69726	1.03796	1.96886	5.64958	4.68762
	3.74153	3.68483	2.72666	1.04183	1.9614	5.64908	4.88524
	3.72894	3.6888	2.74781	1.05176	1.97272	5.65062	5.09091
	3.71952	3.68704	2.76233	1.06558	2.00297	5.6516	5.2956
	3.71895	3.6912	2.7702	1.08172	2.04849	5.64995	5.47206
	3.72766	3.70632	2.76736	1.09863	2.10405	5.64777	5.61664
	3.74388	3.73404	2.74864	1.11457	2.1659	5.6422	5.72827
	3.76807	3.75248	2.70717	1.1284	2.23079	5.63654	5.80975
	3.79748	3.76494	2.63762	1.13622	2.29683	5.63508	5.86406
	3.83008	3.77249	2.5411	1.13615	2.3621	5.63229	5.88741
	3.86247	3.7577	2.42315	1.12764	2.42587	5.62643	5.87395
	3.89234	3.733	2.29313	1.11177	2.48519	5.61664	5.8257
	3.9066	3.71192	2.16342	1.09037	2.53833	5.60295	5.74255
	3.90562	3.69119	2.04782	1.06567	2.58373	5.58862	5.61591
	3.89949	3.66392	1.96117	1.0435	2.62052	5.57221	5.44727
	3.88456	3.64312	1.91884	1.03015	2.64731	5.5476	5.25084
	3.86204	3.60937	1.90555	1.03301	2.66417	5.51325	5.05235
	3.83327	3.57531	1.90852	1.04493	2.66968	5.47478	4.87942
	3.79857	3.55475	1.92966	1.05338	2.66456	5.4366	4.75999
	3.76686	3.53854	1.96472	1.06068	2.64832	5.40164	4.69963
	3.74622	3.53495	2.01173	1.06689	2.62215	5.36905	4.69846
	3.72993	3.53338	2.06754	1.0739	2.58677	5.34111	4.79226
	3.71032	3.52088	2.13521	1.08033	2.54524	5.31972	4.99644
	3.69333	3.50762	2.21497	1.08416	2.49999	5.30485	5.294
	3.67686	3.49013	2.30677	1.08586	2.45471	5.29561	5.65318
	3.67037	3.46224	2.40369	1.08559	2.41349	5.29499	6.02205
	3.67355	3.43905	2.49801	1.08439	2.38142	5.30285	6.36759
	3.67548	3.429	2.57845	1.0812	2.36119	5.31459	6.67734
	3.67363	3.42187	2.63798	1.07687	2.35692	5.32964	6.94689
	3.6732	3.43183	2.67279	1.07122	2.36559	5.35013	7.17412
	3.67659	3.45407	2.68098	1.06681	2.38206	5.37638	7.36164
	3.67878	3.48579	2.66309	1.06538	2.4021	5.40865	7.50908
	3.68052	3.52239	2.62115	1.06914	2.42335	5.44398	7.6253
	3.68436	3.55529	2.55889	1.07734	2.44491	5.48442	7.72084
	3.68498	3.58257	2.48317	1.0896	2.46583	5.52854	7.81503
	3.68011	3.61461	2.40439	1.10379	2.48718	5.57362	7.91631
	3.66282	3.65545	2.33449	1.11923	2.50942	5.61528	8.03076
	3.64146	3.69376	2.28748	1.13366	2.53445	5.65215	8.15826
	3.62554	3.731	2.27293	1.14656	2.56342	5.68028	8.29011
	3.61417	3.76441	2.29413	1.15788	2.59803	5.69589	8.39881
	3.60977	3.79452	2.3522	1.16902	2.63854	5.69778	8.47601
	3.60724	3.81975	2.44428	1.17966	2.68663	5.68717	8.51483
	3.60619	3.84003	2.55607	1.1894	2.74048	5.66927	8.51078
	3.60429	3.84881	2.66094	1.19854	2.79755	5.64585	8.46672
	3.59924	3.85572	2.74982	1.20718	2.85346	5.61808	8.38146
	3.59739	3.85287	2.81923	1.21734	2.90662	5.58588	8.26008
	3.60004	3.84328	2.86759	1.2303	2.95486	5.55536	8.11188
	3.60722	3.8203	2.89534	1.24743	2.99739	5.53284	7.951
	3.61961	3.7834	2.90552	1.26552	3.03241	5.51663	7.79182
	3.63423	3.74078	2.90487	1.2816	3.06003	5.50271	7.66431
	3.6467	3.70561	2.90127	1.29323	3.08076	5.49009	7.58243
	3.65957	3.67776	2.90186	1.29939	3.09634	5.47392	7.53771
	3.67451	3.64768	2.91106	1.29787	3.10502	5.45524	7.5119
	3.68984	3.62927	2.93335	1.28956	3.11027	5.43331	7.50457
	3.70351	3.61353	2.9732	1.27424	3.11092	5.41247	7.50256
	3.71292	3.60232	3.03422	1.25355	3.11191	5.39744	7.50596
	3.7162	3.60016	3.0874	1.22943	3.11117	5.39138	7.51884
	3.71388	3.62087	3.11945	1.20465	3.10969	5.39616	7.538
	3.70666	3.65703	3.12897	1.18107	3.10679	5.40407	7.57161
	3.69119	3.68728	3.11742	1.16002	3.10224	5.41439	7.61487
	3.67209	3.71686	3.08851	1.14058	3.09514	5.42493	7.65822
	3.65347	3.7453	3.04457	1.12288	3.08489	5.43092	7.70648
	3.63527	3.76966	2.99	1.10798	3.07152	5.43307	7.76208
	3.62426	3.78768	2.92888	1.09727	3.05454	5.4323	7.80281
	3.61775	3.7848	2.86055	1.09321	3.03572	5.42625	7.84086
	3.60361	3.76228	2.78099	1.09701	3.01376	5.41664	7.87431
	3.59405	3.73827	2.69071	1.10735	2.98938	5.40629	7.87829
	3.58628	3.71816	2.58905	1.12096	2.96498	5.39621	7.84248
	3.57568	3.69008	2.47878	1.1345	2.94126	5.38435	7.77302
	3.56346	3.66963	2.36756	1.14565	2.91896	5.36933	7.67939
	3.55243	3.65944	2.26481	1.15408	2.90038	5.35174	7.55866
	3.5429	3.65422	2.17907	1.15962	2.88517	5.33144	7.4213
	3.53927	3.65851	2.11963	1.16434	2.87114	5.30876	7.27293
	3.54368	3.67243	2.07407	1.17059	2.85717	5.28645	7.10075
	3.55535	3.68727	2.03142	1.18029	2.84373	5.26144	6.91132
	3.56985	3.68941	2.00082	1.19492	2.83072	5.23292	6.71445
	3.58674	3.6836	1.98568	1.2158	2.819	5.20249	6.52256
	3.60913	3.68422	1.99302	1.24341	2.80958	5.16855	6.35143
	3.62985	3.68906	2.02434	1.27758	2.803	5.13248	6.20959
	3.64805	3.70145	2.06845	1.31677	2.79973	5.09918	6.10529
	3.65434	3.71927	2.11662	1.35909	2.80188	5.07173	6.03562
	3.65355	3.72803	2.16935	1.4018	2.80972	5.05541	6.00005
	3.64969	3.72213	2.22748	1.44065	2.82443	5.05503	5.98277
	3.64149	3.7007	2.29036	1.47253	2.84586	5.07094	5.97981
	3.63424	3.66599	2.35481	1.49516	2.87357	5.1072	5.9862
	3.62719	3.62196	2.41429	1.5073	2.90782	5.16428	5.996
	3.62505	3.57104	2.46257	1.51118	2.9464	5.23123	5.99633
	3.62776	3.53115	2.4952	1.50946	2.98731	5.29894	5.98562
	3.62716	3.49845	2.50802	1.50583	3.02764	5.36728	5.96213
	3.62299	3.46484	2.49926	1.50441	3.06555	5.42965	5.93181
	3.62073	3.43944	2.47011	1.50924	3.10017	5.48359	5.90785
	3.62214	3.42968	2.42634	1.52018	3.13157	5.53106	5.90654
	3.62131	3.43119	2.37576	1.5355	3.15795	5.56905	5.95097
	3.61849	3.44157	2.32977	1.55127	3.17933	5.59862	6.06481
	3.61348	3.45186	2.30265	1.56467	3.19564	5.61716	6.24873
	3.60626	3.47109	2.30838	1.57596	3.20636	5.62352	6.42795
	3.5986	3.50483	2.35747	1.58602	3.21075	5.61788	6.58879
	3.59063	3.53812	2.44334	1.59691	3.21084	5.60242	6.72351
	3.58476	3.56329	2.55462	1.61082	3.20824	5.58181	6.83002
	3.58166	3.5764	2.67665	1.62953	3.20504	5.55738	6.91185
	3.57459	3.59097	2.79477	1.65196	3.20279	5.53099	6.96849
	3.57202	3.60019	2.90226	1.67449	3.20305	5.50889	6.9992
	3.57413	3.5907	2.99322	1.69478	3.20463	5.4912	7.01017
	3.57467	3.57051	3.06385	1.71134	3.20893	5.47869	7.00848
	3.57486	3.53987	3.11157	1.72318	3.21452	5.47352	7.00922
	3.57717	3.50722	3.1354	1.72948	3.2226	5.47712	7.03255
	3.58445	3.476	3.13476	1.73013	3.2303	5.4884	7.08497
	3.59009	3.45414	3.1098	1.72722	3.23592	5.5036	7.16792
	3.59698	3.45349	3.06194	1.72241	3.23853	5.52298	7.25019
	3.59836	3.45537	2.99272	1.71803	3.23901	5.54827	7.32236
	3.59738	3.46828	2.90367	1.71567	3.23725	5.58017	7.37303
	3.59322	3.49359	2.79642	1.71591	3.23264	5.61631	7.40003
	3.58628	3.52205	2.67275	1.71653	3.22583	5.65271	7.40409
	3.57916	3.55217	2.53564	1.71803	3.2181	5.69151	7.38733
	3.57371	3.58606	2.39075	1.71769	3.21012	5.73782	7.35288
	3.56896	3.61369	2.24419	1.71533	3.20089	5.79486	7.31296
	3.56679	3.62568	2.10187	1.71123	3.1903	5.8619	7.28306
	3.57132	3.61429	1.97213	1.7049	3.17818	5.93108	7.27826
	3.58101	3.58265	1.86471	1.69688	3.16324	5.99611	7.30426
	3.59392	3.5398	1.79035	1.68713	3.14315	6.0418	7.34208
	3.60348	3.50115	1.75745	1.67533	3.11711	6.0649	7.35502
	3.6126	3.4827	1.7338	1.66069	3.08425	6.06533	7.33854
	3.61675	3.48114	1.71584	1.64473	3.0456	6.04237	7.29543
	3.61536	3.48257	1.70667	1.62669	3.00523	5.99978	7.23213
	3.61735	3.48722	1.70693	1.60597	2.96629	5.94151	7.16044
	3.62157	3.51474	1.70994	1.58272	2.93291	5.86914	7.08838
	3.62813	3.5542	1.71721	1.55983	2.91074	5.78124	7.01497
	3.63566	3.61116	1.72797	1.53932	2.90415	5.6875	6.93928
	3.64757	3.67547	1.73557	1.52411	2.91452	5.59708	6.84843
	3.65928	3.73731	1.73574	1.51565	2.93947	5.52161	6.73583
	3.6646	3.79262	1.73055	1.51497	2.9673	5.47573	6.57573
	3.66857	3.83228	1.7242	1.51932	2.99071	5.45286	6.36079
	3.67093	3.86197	1.72231	1.52811	3.00862	5.44917	6.09371
	3.66731	3.88753	1.72722	1.53932	3.01744	5.45663	5.79083
	3.6632	3.90178	1.73362	1.55186	3.01642	5.47426	5.48221
	3.65806	3.90898	1.74507	1.56302	3.00389	5.5007	5.22228
	3.65517	3.9108	1.76647	1.57232	2.97953	5.53363	5.02212
	3.64832	3.91023	1.79328	1.57993	2.94323	5.571	4.85781
	3.6419	3.91514	1.8171	1.58591	2.89651	5.61011	4.72909
	3.63485	3.93608	1.83856	1.58948	2.84016	5.64771	4.62729
	3.6261	3.97322	1.85629	1.58963	2.77734	5.68582	4.53567
	3.62565	4.02875	1.86699	1.58489	2.7087	5.72314	4.46376
	3.63474	4.07368	1.86795	1.57555	2.63853	5.75846	4.41694
	3.64989	4.11313	1.85732	1.56162	2.56999	5.79087	4.40265
	3.67328	4.1638	1.83424	1.54426	2.50615	5.81053	4.43971
	3.70057	4.20971	1.79962	1.52601	2.45075	5.81992	4.52038
	3.72301	4.25722	1.75498	1.51114	2.40619	5.81633	4.63138
	3.73077	4.28457	1.70653	1.50419	2.37562	5.80288	4.7516
	3.72898	4.28574	1.66565	1.50779	2.36059	5.7819	4.86686
	3.72129	4.2774	1.64644	1.52199	2.36096	5.75103	4.97249
	3.71063	4.26075	1.66292	1.54431	2.37385	5.70882	5.05566
	3.69945	4.23656	1.72348	1.57018	2.39707	5.65549	5.10528
	3.68968	4.21121	1.81448	1.59607	2.42661	5.59678	5.13132
	3.68323	4.18382	1.93323	1.62036	2.4594	5.53859	5.15369
	3.67814	4.15144	2.07811	1.63986	2.49037	5.48599	5.19588
	3.6702	4.12116	2.2325	1.65324	2.51725	5.44518	5.26973
	3.6601	4.0833	2.39009	1.66144	2.53788	5.41939	5.35616
	3.64804	4.03571	2.55101	1.6657	2.55111	5.40457	5.45431
	3.63453	3.97444	2.71639	1.66777	2.55476	5.39756	5.55566
	3.61316	3.91663	2.88751	1.66956	2.54972	5.39697	5.64989
	3.59354	3.87707	3.05908	1.67219	2.53742	5.40106	5.748
	3.57949	3.854	3.21064	1.67477	2.51901	5.4075	5.86075
	3.56825	3.82915	3.33601	1.67623	2.49529	5.41658	5.99772
	3.55911	3.80467	3.43251	1.67613	2.47115	5.43107	6.13673
	3.54805	3.77126	3.49796	1.6736	2.44991	5.44793	6.27214
	3.5425	3.73163	3.52804	1.67109	2.43395	5.46461	6.40067
	3.5375	3.70412	3.51879	1.66892	2.41874	5.47973	6.51751
	3.53549	3.69008	3.47057	1.66789	2.40216	5.49175	6.62144
	3.5361	3.69207	3.38479	1.66917	2.38422	5.49982	6.7068
	3.54007	3.70427	3.26623	1.67035	2.36496	5.50188	6.76148
	3.54619	3.70927	3.11985	1.67099	2.34598	5.49974	6.78602
	3.55289	3.71266	2.9542	1.67063	2.33166	5.49671	6.78982
	3.55691	3.69648	2.77732	1.67087	2.32572	5.49341	6.78122
	3.56172	3.67095	2.59901	1.67232	2.33482	5.4928	6.76294
	3.56688	3.66278	2.42866	1.67567	2.36341	5.49408	6.73544
	3.57586	3.65435	2.27972	1.68297	2.41108	5.5	6.70217
	3.59297	3.65536	2.16731	1.69381	2.4756	5.51289	6.67088
	3.61264	3.66445	2.10226	1.70822	2.56172	5.5268	6.63371
	3.63882	3.67898	2.09238	1.72162	2.6624	5.53684	6.57215
	3.66668	3.70061	2.10258	1.72818	2.77012	5.54454	6.48399
	3.69363	3.72288	2.12775	1.72605	2.88001	5.54989	6.37375
	3.71393	3.7417	2.1692	1.7159	2.9887	5.55136	6.24937
	3.72623	3.75445	2.21167	1.69783	3.09466	5.54773	6.11036
	3.73078	3.75499	2.2495	1.67531	3.19532	5.537	5.96837
	3.72999	3.74192	2.27665	1.64989	3.28851	5.51829	5.8401
	3.71933	3.71246	2.28582	1.62499	3.37349	5.49306	5.69908
	3.70726	3.66767	2.27797	1.59992	3.44998	5.46236	5.5511
	3.69085	3.61823	2.25487	1.5725	3.51684	5.43062	5.40015
	3.66836	3.57316	2.22318	1.53913	3.57329	5.40017	5.25406
	3.64179	3.5327	2.18874	1.50125	3.61837	5.37025	5.1274
	3.618	3.50197	2.15878	1.45904	3.65177	5.34206	5.03816
	3.60125	3.49685	2.13804	1.41694	3.67279	5.31227	5.00561
	3.58835	3.51371	2.13101	1.37801	3.68248	5.2814	5.0282
	3.583	3.5355	2.14125	1.34547	3.68216	5.24634	5.10063
	3.58616	3.55393	2.16522	1.32061	3.6746	5.20812	5.21889
	3.5941	3.55841	2.18449	1.30753	3.66029	5.16785	5.36425
	3.59987	3.55711	2.19596	1.30796	3.64162	5.12868	5.52013
	3.60534	3.54689	2.19817	1.32193	3.62241	5.09769	5.69051
	3.60972	3.53328	2.19306	1.34606	3.60598	5.07313	5.86391
	3.61762	3.52257	2.17968	1.37517	3.59369	5.05651	6.02853
	3.62476	3.5078	2.15867	1.40696	3.58566	5.04718	6.18328
	3.63193	3.49434	2.13286	1.43802	3.58029	5.04419	6.33214
	3.64805	3.4965	2.10636	1.46307	3.57564	5.04204	6.47619
	3.66403	3.50599	2.08191	1.48272	3.5699	5.04093	6.62034
	3.67836	3.50813	2.06319	1.49815	3.56097	5.04229	6.76209
	3.69506	3.51718	2.05139	1.51149	3.5481	5.04854	6.8871
	3.71457	3.52788	2.04398	1.52514	3.53341	5.05838	6.9909
	3.7327	3.53039	2.04167	1.54319	3.51686	5.06937	7.06705
	3.75405	3.52587	2.04509	1.56812	3.49743	5.08141	7.11144
	3.77109	3.51103	2.05383	1.59825	3.47431	5.0939	7.12221
	3.77739	3.50394	2.06426	1.6306	3.4485	5.10903	7.10654
	3.7762	3.51524	2.07428	1.6629	3.42001	5.12997	7.07412
	3.76667	3.54027	2.08151	1.693	3.38958	5.15351	7.0372
	3.75756	3.56794	2.08689	1.71836	3.3581	5.17465	7.01097
	3.74889	3.59097	2.09532	1.73799	3.32627	5.19305	7.00545
	3.73781	3.59924	2.11435	1.75063	3.29436	5.21425	7.01551
	3.7186	3.59076	2.15114	1.75153	3.26236	5.24268	7.0227
	3.70079	3.58761	2.21515	1.73891	3.23158	5.27596	7.02574
	3.6833	3.5798	2.31276	1.7129	3.20091	5.31125	7.02475
	3.66716	3.55979	2.4475	1.67457	3.17034	5.34627	7.02309
	3.66246	3.54241	2.60625	1.6282	3.1422	5.37957	7.01634
	3.66785	3.51615	2.76141	1.57936	3.11607	5.41135	6.99498
	3.68077	3.48911	2.90511	1.53273	3.09261	5.43994	6.95324
	3.69921	3.48146	3.03033	1.49267	3.0728	5.46562	6.89093
	3.72043	3.48859	3.13367	1.46143	3.05821	5.48785	6.80859
	3.73842	3.49162	3.21267	1.43875	3.04908	5.50317	6.70298
	3.75013	3.4949	3.26533	1.42396	3.04552	5.51451	6.57559
	3.751	3.50046	3.29037	1.41646	3.04756	5.52416	6.43293
	3.74843	3.51113	3.2856	1.41274	3.05434	5.53098	6.28907
	3.75242	3.51736	3.25109	1.41292	3.06494	5.53358	6.15476
	3.75769	3.50912	3.18545	1.41644	3.07769	5.52842	6.03957
	3.76011	3.48729	3.08714	1.4226	3.09003	5.51354	5.93379
	3.76483	3.45403	2.95561	1.43119	3.10105	5.49198	5.83734
	3.76184	3.42187	2.79543	1.44237	3.1098	5.46593	5.76713
	3.7485	3.39345	2.61532	1.45575	3.11569	5.43586	5.73946
	3.73018	3.37068	2.4316	1.47076	3.11805	5.40736	5.74328
	3.71472	3.36241	2.26438	1.48718	3.11705	5.38745	5.77393
	3.70368	3.36819	2.13639	1.50382	3.11298	5.3729	5.79656
	3.70398	3.38444	2.07398	1.51951	3.10501	5.36019	5.8099
	3.70469	3.41563	2.09862	1.53101	3.09197	5.35014	5.83399
	3.70356	3.45689	2.21835	1.53936	3.0741	5.34152	5.89072
	3.69646	3.50366	2.40137	1.54547	3.05098	5.33072	6.00675
	3.68118	3.54137	2.60296	1.54891	3.02145	5.31788	6.18551
	3.66909	3.56993	2.80931	1.55083	2.98516	5.305	6.35746
	3.65675	3.58856	3.01542	1.55288	2.9406	5.2948	6.51174
	3.64448	3.60111	3.21141	1.55539	2.88845	5.28103	6.64832
	3.63284	3.60624	3.39178	1.5597	2.82989	5.26198	6.76676
	3.6187	3.62043	3.55071	1.56567	2.76635	5.24165	6.86625
	3.60727	3.64565	3.68383	1.57277	2.70043	5.22562	6.95431
	3.60348	3.67685	3.78483	1.57832	2.63683	5.21694	7.04349
	3.59694	3.70634	3.85083	1.58208	2.57987	5.21611	7.13371
	3.59112	3.73826	3.87876	1.58131	2.53362	5.21511	7.22633
	3.59182	3.77187	3.86629	1.57446	2.50407	5.21357	7.32114
	3.59331	3.80013	3.81243	1.56034	2.49569	5.21284	7.42061
	3.59699	3.82499	3.71783	1.53953	2.51237	5.21393	7.51202
	3.60472	3.84547	3.5823	1.5145	2.5541	5.21393	7.58681
	3.61407	3.86264	3.41065	1.48707	2.61451	5.21404	7.6527
	3.62566	3.87779	3.21055	1.45835	2.68229	5.21157	7.706
	3.63941	3.89547	2.99124	1.43122	2.75115	5.21022	7.73176
	3.6552	3.90969	2.76615	1.4083	2.8174	5.21017	7.71521
	3.66964	3.90152	2.55271	1.38954	2.87812	5.21368	7.65615
	3.68378	3.88078	2.36596	1.37429	2.92931	5.22373	7.56261
	3.69474	3.86499	2.21964	1.36181	2.97127	5.23708	7.44959
	3.70946	3.86154	2.12561	1.35317	3.00295	5.24923	7.32735
	3.72501	3.85523	2.07438	1.34984	3.02446	5.25994	7.21864
	3.73994	3.83777	2.05468	1.35294	3.03506	5.27122	7.13431
	3.75545	3.80647	2.0608	1.36396	3.03719	5.28084	7.01003
	3.77021	3.778	2.07995	1.38281	3.03125	5.28987	6.88783
	3.78687	3.75864	2.09933	1.40559	3.01944	5.29473	6.7646
	3.80308	3.73197	2.11311	1.43025	3.00413	5.29528	6.64614
	3.81888	3.7071	2.11967	1.45387	2.98905	5.29121	6.52115
	3.83508	3.68222	2.12019	1.47401	2.97669	5.28383	6.39159
	3.84936	3.65088	2.11853	1.48972	2.97086	5.27559	6.2685
	3.85858	3.61728	2.12068	1.50072	2.97177	5.27208	6.13612
	3.86401	3.57866	2.12955	1.50673	2.97959	5.27214	5.98902
	3.8742	3.53918	2.1474	1.50787	2.99352	5.27175	5.83885
	3.88274	3.49535	2.17455	1.50521	3.0106	5.26977	5.70403
	3.88392	3.44806	2.21188	1.49966	3.02875	5.26777	5.61335
	3.8704	3.41217	2.25638	1.4922	3.04594	5.2629	5.58542
	3.844	3.39065	2.303	1.48387	3.06003	5.25747	5.554
	3.80961	3.38343	2.34467	1.47609	3.06899	5.25257	5.51532
	3.7744	3.37281	2.378	1.46967	3.07134	5.25276	5.46638
	3.73844	3.37198	2.40208	1.4658	3.06599	5.26111	5.41676
	3.70815	3.38863	2.41892	1.46542	3.05264	5.27169	5.38859
	3.69596	3.42871	2.43116	1.47003	3.03167	5.28383	5.40275
	3.68849	3.47566	2.44165	1.48	3.00402	5.29544	5.44143
	3.67809	3.51421	2.45389	1.49356	2.9709	5.30357	5.48939
	3.66271	3.53679	2.46889	1.50834	2.93403	5.30794	5.53134
	3.64651	3.55621	2.48283	1.52323	2.89514	5.31126	5.55978
	3.62941	3.57612	2.49071	1.53824	2.8571	5.30786	5.57383
	3.61274	3.59327	2.48891	1.55339	2.82139	5.29413	5.57486
	3.60217	3.59632	2.47171	1.56966	2.79073	5.26342	5.56633
	3.59558	3.59287	2.43323	1.58754	2.76654	5.21	5.55508
	3.59271	3.59776	2.37476	1.60683	2.7496	5.12944	5.54613
	3.5947	3.61791	2.30098	1.62707	2.74081	5.023	5.54171
	3.60103	3.64486	2.22018	1.64816	2.74012	4.89996	5.54676
	3.61307	3.68444	2.14446	1.66972	2.74588	4.78189	5.55662
	3.62949	3.73542	2.08642	1.69084	2.75867	4.70617	5.58078
	3.64965	3.78194	2.05922	1.71113	2.7766	4.61551	5.63251
	3.67107	3.79968	2.0705	1.73164	2.79893	4.54183	5.69457
	3.68595	3.8054	2.11851	1.75236	2.82449	4.47187	5.75685
	3.68669	3.79928	2.20333	1.7741	2.85151	4.41161	5.82156
	3.68318	3.78442	2.29911	1.79789	2.87994	4.36171	5.88477
	3.67964	3.76071	2.3981	1.8233	2.90964	4.32783	5.94025
	3.67813	3.73054	2.49706	1.84848	2.94027	4.31238	5.982
	3.68254	3.70679	2.58059	1.86955	2.97179	4.31624	6.0017
	3.68887	3.68693	2.64163	1.88521	3.00404	4.34043	5.98575
	3.69465	3.66665	2.67656	1.89377	3.03667	4.38887	5.93075
	3.69637	3.66209	2.68531	1.89501	3.06911	4.4637	5.85186
	3.69114	3.65982	2.66957	1.88893	3.10031	4.56479	5.77205
	3.67928	3.64434	2.63205	1.87642	3.13019	4.66827	5.70305
	3.65962	3.61948	2.57703	1.85958	3.15743	4.74598	5.64742
	3.63311	3.59075	2.51222	1.8414	3.18028	4.8198	5.60439
	3.6059	3.55443	2.44222	1.82311	3.19841	4.88132	5.58266
	3.57938	3.51727	2.37178	1.80606	3.21127	4.93036	5.58346
	3.56151	3.49395	2.30644	1.79136	3.21747	4.97097	5.61876
	3.55392	3.47658	2.2531	1.78129	3.21641	5.01018	5.69184
	3.54833	3.46535	2.21709	1.77517	3.20775	5.04253	5.81512
	3.54236	3.46254	2.1986	1.77512	3.19122	5.07151	5.96317
	3.53861	3.4662	2.18798	1.78115	3.16713	5.099	6.1321
	3.53965	3.46543	2.1691	1.79437	3.13584	5.12613	6.31434
	3.53775	3.4559	2.13739	1.81538	3.09879	5.15109	6.50372
	3.53864	3.44321	2.08959	1.84295	3.05727	5.1718	6.6949
	3.5401	3.44224	2.02546	1.87348	3.01205	5.1853	6.87576
	3.54298	3.45029	1.94854	1.90347	2.96505	5.19282	7.03447
	3.55141	3.47205	1.86765	1.93097	2.91804	5.19393	7.16441
	3.55732	3.50438	1.79507	1.95287	2.87318	5.19081	7.26418
	3.56192	3.55826	1.74833	1.96705	2.83351	5.18657	7.32481
	3.56301	3.63298	1.7442	1.97446	2.79813	5.18517	7.34803
	3.56332	3.71772	1.79829	1.97541	2.76501	5.18826	7.34259
	3.56139	3.81277	1.92012	1.97098	2.7356	5.19439	7.30845
	3.55982	3.90774	2.07595	1.96293	2.71264	5.20371	7.25183
	3.56022	3.97522	2.25343	1.95072	2.69736	5.21808	7.19396
	3.5627	4.00352	2.44021	1.93465	2.68857	5.23398	7.15134
	3.56702	4.00977	2.62198	1.91452	2.68659	5.24962	7.14567
	3.5707	4.00096	2.79227	1.88642	2.68946	5.26083	7.16673
	3.57614	3.96906	2.94717	1.84814	2.69636	5.26622	7.17812
	3.58162	3.91781	3.08131	1.79828	2.70634	5.26388	7.17507
	3.58388	3.86948	3.19205	1.73715	2.7178	5.25559	7.15406
	3.58432	3.82121	3.27771	1.66566	2.72878	5.24238	7.11246
	3.58471	3.77788	3.33565	1.5876	2.7397	5.22811	7.04504
	3.58769	3.742	3.36372	1.50865	2.74942	5.21679	6.95454
	3.5901	3.74115	3.36265	1.43589	2.75709	5.2063	6.85271
	3.59165	3.72875	3.33385	1.37485	2.76396	5.19809	6.74832
	3.59416	3.72762	3.28093	1.33113	2.77096	5.19369	6.65615
	3.59253	3.74477	3.21053	1.30323	2.77916	5.18717	6.57342
	3.59036	3.77508	3.13146	1.28441	2.79004	5.17556	6.50068
	3.58853	3.79721	3.05437	1.26346	2.80652	5.15907	6.44191
	3.58551	3.82864	2.99145	1.23523	2.82951	5.13923	6.39921
	3.58369	3.86257	2.95281	1.19728	2.85878	5.11617	6.37307
	3.58826	3.89438	2.93662	1.15268	2.89324	5.09114	6.36681
	3.59254	3.9216	2.93128	1.11225	2.93026	5.06378	6.3739
	3.59494	3.93709	2.94181	1.09096	2.96693	5.03864	6.35956
	3.59639	3.93984	2.96997	1.10217	3.00262	5.02002	6.32746
	3.59988	3.94503	3.01071	1.14398	3.03639	5.0103	6.29134
	3.60118	3.9543	3.0543	1.19893	3.0683	5.0089	6.27421
	3.60387	3.96213	3.09466	1.27407	3.09822	5.01478	6.28619
	3.60517	3.96971	3.12976	1.36323	3.12675	5.02684	6.32671
	3.60629	3.96458	3.15652	1.46061	3.15471	5.04214	6.40322
	3.6088	3.94932	3.17279	1.55944	3.1823	5.05795	6.50964
	3.61331	3.9246	3.17752	1.65658	3.21069	5.07257	6.64614
	3.6198	3.88077	3.16981	1.75082	3.2387	5.08496	6.78873
	3.62313	3.82536	3.14827	1.84001	3.26543	5.09848	6.91311
	3.62392	3.76479	3.1134	1.92112	3.28969	5.11278	7.01534
	3.62535	3.70485	3.06591	1.99337	3.30996	5.12969	7.09381
	3.62338	3.64551	3.00863	2.05739	3.32501	5.14842	7.15252
	3.6177	3.60259	2.94567	2.1137	3.33409	5.1657	7.19209
	3.61166	3.56713	2.87753	2.16298	3.33821	5.18281	7.2141
	3.60365	3.54085	2.80728	2.20671	3.33731	5.19858	7.22725
	3.59412	3.51871	2.74291	2.24591	3.33282	5.21241	7.24973
	3.58842	3.49847	2.69066	2.28286	3.32628	5.22554	7.29395
	3.58452	3.48641	2.65368	2.31923	3.31813	5.23565	7.35671
	3.58349	3.48121	2.63346	2.35713	3.31011	5.24165	7.42041
	3.58624	3.48642	2.63403	2.39626	3.30273	5.24759	7.47689
	3.58945	3.49579	2.65812	2.43595	3.29737	5.25092	7.5323
	3.59471	3.51064	2.70776	2.47343	3.29366	5.25068	7.59376
	3.60148	3.51751	2.78327	2.50748	3.29169	5.24712	7.66842
	3.6089	3.51657	2.8806	2.53614	3.29262	5.23992	7.76181
	3.61666	3.52046	2.98776	2.55804	3.29485	5.23352	7.85261
	3.62763	3.52894	3.09382	2.5731	3.2973	5.22839	7.90958
	3.63614	3.53748	3.19415	2.58327	3.29839	5.22349	7.92513
	3.64539	3.54184	3.28476	2.59072	3.29671	5.217	7.90153
	3.65583	3.54582	3.36285	2.59846	3.29051	5.20975	7.84493
	3.66707	3.55214	3.42619	2.60957	3.27975	5.20162	7.75941
	3.67329	3.56	3.47036	2.62611	3.2637	5.19244	7.63776
	3.67531	3.57998	3.4913	2.64786	3.24301	5.1843	7.48749
	3.67253	3.60375	3.48442	2.67264	3.21788	5.17643	7.32576
	3.66684	3.63334	3.44708	2.69707	3.18803	5.1672	7.17149
	3.65661	3.66447	3.37838	2.71898	3.15369	5.15551	7.05891
	3.64906	3.68233	3.28209	2.7379	3.1153	5.14188	6.9565
	3.64202	3.6841	3.16331	2.75201	3.07336	5.12682	6.85974
	3.63925	3.67331	3.02944	2.75885	3.02942	5.11188	6.78052
	3.63632	3.66237	2.89422	2.75685	2.98471	5.09917	6.74331
	3.62831	3.64478	2.77102	2.74415	2.94044	5.09003	6.74829
	3.61813	3.62313	2.67345	2.72023	2.8976	5.08329	6.78093
	3.60793	3.59593	2.61411	2.68651	2.86138	5.07743	6.80825
	3.59899	3.56603	2.58314	2.64602	2.83296	5.07455	6.83183
	3.5964	3.53529	2.56406	2.60152	2.81389	5.07426	6.86041
	3.59797	3.51084	2.5675	2.55703	2.80851	5.07422	6.89849
	3.60628	3.50456	2.60153	2.51667	2.81781	5.07474	6.94776
	3.61684	3.50657	2.6737	2.48466	2.83897	5.07701	7.01179
	3.62687	3.51741	2.78684	2.46483	2.86762	5.0804	7.08403
	3.63344	3.53095	2.91676	2.45683	2.89987	5.08142	7.15996
	3.63545	3.55306	3.02999	2.46024	2.93379	5.08123	7.23175
	3.63388	3.58685	3.12641	2.46967	2.96892	5.07967	7.29429
	3.63338	3.63645	3.20069	2.4827	3.00624	5.07783	7.33302
	3.63034	3.69284	3.25267	2.49479	3.04561	5.07666	7.34763
	3.6278	3.73907	3.28199	2.50399	3.08671	5.0763	7.33835
	3.63194	3.77367	3.29551	2.50788	3.12925	5.07675	7.29774
	3.63753	3.78906	3.29796	2.50805	3.1715	5.08079	7.22365
	3.65118	3.78407	3.2982	2.50428	3.21258	5.08478	7.11788
	3.6674	3.76621	3.30555	2.49825	3.25041	5.08784	6.99406
	3.6784	3.75062	3.32818	2.48864	3.28289	5.08839	6.87624
	3.68449	3.73789	3.36864	2.4754	3.30832	5.08662	6.76637
	3.68753	3.72712	3.40635	2.45809	3.32673	5.08294	6.68103
	3.69242	3.70454	3.43831	2.43948	3.3374	5.08003	6.63138
	3.70025	3.67335	3.4641	2.42171	3.34086	5.0773	6.60339
	3.7112	3.64667	3.48348	2.40845	3.33705	5.07407	6.60465
	3.72348	3.62056	3.49087	2.40171	3.32474	5.07047	6.64819
	3.73395	3.58675	3.48193	2.40431	3.30508	5.06961	6.68989
	3.73852	3.5509	3.45216	2.41411	3.27738	5.07078	6.73273
	3.73489	3.52295	3.40284	2.428	3.24139	5.07277	6.77997
	3.72605	3.51309	3.33587	2.44265	3.19625	5.07631	6.83024
	3.71729	3.5199	3.2564	2.45551	3.14099	5.08238	6.8749
	3.71377	3.53191	3.1708	2.46323	3.07428	5.08957	6.91678
	3.71537	3.54396	3.08671	2.46452	2.99488	5.09415	6.96595
	3.72396	3.5544	3.00973	2.4596	2.90634	5.09686	7.02276
	3.72974	3.56924	2.93915	2.45028	2.80635	5.09548	7.08847
	3.72903	3.58438	2.8757	2.43956	2.69842	5.09053	7.16891
	3.71979	3.61168	2.81915	2.42982	2.58585	5.08577	7.27528
	3.70031	3.63166	2.76357	2.42327	2.47373	5.08189	7.39828
	3.67675	3.63933	2.71546	2.422	2.36839	5.08069	7.51925
	3.65185	3.63758	2.68276	2.42808	2.27779	5.07838	7.61056
	3.63072	3.62594	2.67245	2.44293	2.2086	5.07338	7.67199
	3.61702	3.61599	2.68784	2.46702	2.15889	5.06736	7.70294
	3.60533	3.6032	2.7251	2.49938	2.1153	5.06454	7.70508
	3.59687	3.58362	2.76469	2.53357	2.07914	5.06884	7.68511
	3.59219	3.56366	2.79255	2.56503	2.0538	5.07788	7.64508
	3.59295	3.55039	2.80433	2.59224	2.04425	5.08815	7.58492
	3.59584	3.54362	2.79781	2.61467	2.0543	5.10109	7.50854
	3.59753	3.54509	2.77146	2.63115	2.08788	5.11727	7.43026
	3.60421	3.5465	2.72666	2.6423	2.1492	5.13654	7.36455
	3.60669	3.54202	2.66467	2.64923	2.22497	5.15413	7.25797
	3.60314	3.541	2.58723	2.65246	2.30866	5.16685	7.11195
	3.6052	3.53963	2.49912	2.65361	2.40136	5.17331	6.93915
	3.61119	3.5507	2.40493	2.65475	2.50401	5.17602	6.76212
	3.6141	3.56094	2.31099	2.65543	2.61644	5.17639	6.60728
	3.61526	3.57149	2.22695	2.65702	2.73577	5.17362	6.49373
	3.61719	3.59448	2.16254	2.65953	2.85859	5.16578	6.29371
	3.62451	3.63306	2.12458	2.66499	2.98286	5.1502	6.07559
	3.63522	3.69627	2.11265	2.67423	3.10623	5.12804	5.89954
	3.64176	3.76464	2.10233	2.68821	3.22564	5.10254	5.66989
	3.64471	3.84021	2.09369	2.70839	3.34068	5.07431	5.44689
	3.64092	3.9085	2.08928	2.73679	3.45004	5.04611	5.22631
	3.63108	3.96225	2.0918	2.77228	3.55397	5.02257	5.00674
	3.62203	3.99912	2.10165	2.81366	3.64847	5.00501	4.80227
	3.61722	4.02695	2.12127	2.86056	3.73364	4.99135	4.59992
	3.6119	4.05432	2.15115	2.91234	3.80867	4.9833	4.41565
	3.60843	4.08533	2.18878	2.96727	3.87244	4.98104	4.2958
	3.59978	4.11182	2.22819	3.02226	3.92437	4.9848	4.25312
	3.58815	4.13081	2.2654	3.07495	3.96512	4.99591	4.24496
	3.58246	4.13574	2.29728	3.12476	3.9953	5.01135	4.26243
	3.57934	4.12673	2.32047	3.17049	4.01536	5.03126	4.27898
	3.57885	4.07863	2.33481	3.21229	4.02734	5.05473	4.29845
	3.57544	4.02011	2.34019	3.25202	4.0345	5.08034	4.34531
	3.56703	3.96132	2.33939	3.29061	4.03876	5.1032	4.43691
	3.5636	3.896	2.33569	3.32815	4.04265	5.1189	4.56591
	3.56185	3.82675	2.33298	3.36485	4.04972	5.1299	4.70736
	3.56635	3.75307	2.33322	3.40008	4.06177	5.14014	4.86202
	3.57638	3.67514	2.34209	3.43255	4.08006	5.14904	5.02648
	3.59356	3.59846	2.35611	3.46107	4.10361	5.15147	5.18247
	3.61193	3.5355	2.36521	3.48461	4.13008	5.15254	5.33032
	3.63107	3.49861	2.37453	3.50084	4.15757	5.15422	5.47374
	3.65115	3.47924	2.39079	3.50887	4.18308	5.15409	5.61921
	3.66752	3.4635	2.42296	3.50704	4.20479	5.1537	5.76421
	3.68382	3.44493	2.48179	3.49449	4.22099	5.15325	5.90855
	3.69825	3.43752	2.57723	3.47134	4.2303	5.15266	6.05209
	3.71151	3.43729	2.70251	3.43929	4.23151	5.15106	6.19023
	3.71748	3.43919	2.82057	3.39988	4.22433	5.1514	6.31788
	3.72376	3.43999	2.92703	3.3559	4.20689	5.15399	6.43281
	3.72415	3.43652	3.02356	3.31022	4.17857	5.15647	6.52946
	3.71805	3.43294	3.1125	3.26662	4.13941	5.15789	6.60022
	3.70382	3.42915	3.19642	3.22659	4.08843	5.15882	6.64216
	3.68159	3.42353	3.27926	3.192	4.02518	5.15851	6.65473
	3.66352	3.42014	3.36731	3.16377	3.95099	5.15984	6.63713
	3.64831	3.42137	3.46407	3.14264	3.86545	5.15995	6.59705
	3.64252	3.42619	3.56761	3.127	3.77148	5.15603	6.5429
	3.64729	3.43444	3.66769	3.11877	3.672	5.14971	6.48941
	3.65052	3.44615	3.74948	3.11888	3.57163	5.14503	6.44427
	3.65464	3.4558	3.80894	3.12756	3.47512	5.1423	6.40973
	3.66151	3.47577	3.84558	3.14554	3.3887	5.14234	6.38695
	3.67368	3.49242	3.85812	3.17201	3.31887	5.145	6.36975
	3.69101	3.50225	3.84924	3.20456	3.27196	5.15008	6.3518
	3.71354	3.50987	3.82043	3.23981	3.25151	5.15907	6.32993
	3.72575	3.51343	3.77352	3.27365	3.25516	5.17069	6.29956
	3.72459	3.51044	3.70936	3.30173	3.27377	5.1825	6.25236
	3.72377	3.51026	3.63195	3.32216	3.2997	5.19216	6.18586
	3.7215	3.52114	3.5451	3.33157	3.32997	5.20285	6.10189
	3.71511	3.53448	3.45505	3.32899	3.36252	5.21527	6.00534
	3.70232	3.54984	3.36301	3.31479	3.3956	5.23035	5.90134
	3.68646	3.56454	3.27013	3.29119	3.4289	5.24497	5.79705
	3.66645	3.5802	3.17337	3.26004	3.46192	5.25916	5.70342
	3.64595	3.59366	3.07108	3.22528	3.49423	5.26903	5.63035
	3.62687	3.62086	2.96448	3.19148	3.52569	5.27265	5.57658
	3.61189	3.67133	2.8577	3.16199	3.55764	5.27295	5.53235
	3.60559	3.7502	2.7534	3.1433	3.59019	5.27001	5.50506
	3.60641	3.85002	2.65129	3.14022	3.62319	5.26318	5.50409
	3.61409	3.92992	2.55612	3.15761	3.65659	5.2534	5.54194
	3.63152	3.99911	2.47421	3.18536	3.69162	5.23845	5.61265
	3.65781	4.06785	2.413	3.21143	3.72804	5.22147	5.69693
	3.68687	4.11403	2.37806	3.23227	3.76421	5.20309	5.79699
	3.70756	4.12704	2.37766	3.24618	3.79983	5.1845	5.90445
	3.72423	4.114	2.4171	3.25168	3.83376	5.16759	6.01208
	3.73571	4.07494	2.49156	3.24738	3.86462	5.15268	6.11446
	3.74354	4.00153	2.58793	3.23373	3.89127	5.14002	6.2084
	3.74465	3.91177	2.69887	3.21242	3.91295	5.12994	6.28485
	3.74531	3.82367	2.81581	3.1835	3.92923	5.12127	6.34606
	3.74912	3.757	2.92288	3.14999	3.93947	5.11439	6.38718
	3.759	3.69105	3.01466	3.11341	3.94339	5.10704	6.40875
	3.77184	3.63164	3.08872	3.07947	3.94217	5.09995	6.42859
	3.79274	3.59051	3.14087	3.05139	3.93505	5.09708	6.45268
	3.81179	3.55509	3.16784	3.03367	3.92259	5.10003	6.46905
	3.82962	3.5222	3.16692	3.02962	3.90504	5.10587	6.47291
	3.84264	3.50545	3.13671	3.03904	3.88324	5.11212	6.46443
	3.84792	3.50471	3.07598	3.05723	3.85733	5.11956	6.44718
	3.84864	3.51101	2.98784	3.0796	3.82801	5.1266	6.43913
	3.83924	3.51978	2.87866	3.10353	3.7943	5.13419	6.46512
	3.81857	3.52874	2.75905	3.12657	3.75566	5.13886	6.55177
	3.79199	3.52646	2.64434	3.14484	3.71384	5.14066	6.6941
	3.75921	3.52528	2.55239	3.15771	3.67163	5.13641	6.84588
	3.72618	3.53242	2.50359	3.16456	3.6274	5.13109	6.99022
	3.69385	3.54813	2.51385	3.1666	3.58193	5.12437	7.10907
	3.66492	3.56022	2.58999	3.16057	3.53503	5.11832	7.19159
	3.63806	3.57479	2.73299	3.14863	3.48772	5.11132	7.24107
	3.61921	3.59715	2.89327	3.1334	3.44005	5.10329	7.26334
	3.60604	3.62692	3.05474	3.11871	3.39378	5.09491	7.27267
	3.59618	3.65607	3.21174	3.10731	3.34961	5.08547	7.28042
	3.58728	3.68343	3.36421	3.10139	3.3081	5.07456	7.3002
	3.58038	3.70539	3.50746	3.0998	3.27114	5.06154	7.35028
	3.57431	3.72111	3.63969	3.10083	3.23991	5.04714	7.41956
	3.56707	3.72408	3.75983	3.10186	3.21504	5.0307	7.50234
	3.56158	3.72144	3.86689	3.103	3.19706	5.01344	7.59904
	3.55917	3.69603	3.95657	3.10417	3.18698	4.99924	7.71123
	3.55711	3.64887	4.02534	3.1063	3.18379	4.99012	7.8335
	3.55156	3.59474	4.07194	3.10991	3.18532	4.98855	7.97332
	3.5409	3.54301	4.09505	3.11538	3.1908	4.99397	8.09589
	3.52845	3.5053	4.0955	3.12162	3.19719	5.00303	8.19507
	3.5195	3.48804	4.07446	3.1271	3.20056	5.01236	8.27553
	3.515	3.4792	4.03512	3.1299	3.19886	5.02353	8.33836
	3.51551	3.47942	3.97903	3.12909	3.19126	5.03549	8.38627
	3.51639	3.48391	3.90997	3.12345	3.17665	5.04996	8.43306
	3.51809	3.50107	3.82941	3.11529	3.15512	5.0624	8.47611
	3.52227	3.51992	3.74191	3.10381	3.12718	5.07074	8.51526
	3.52631	3.53282	3.65018	3.08811	3.09326	5.07274	8.55689
	3.52864	3.54172	3.55506	3.06739	3.05585	5.07102	8.61615
	3.53412	3.54678	3.45706	3.04386	3.01839	5.06995	8.70038
	3.53812	3.55534	3.36132	3.01819	2.98449	5.06961	8.79877
	3.53926	3.55402	3.27519	2.99337	2.95782	5.0685	8.91224
	3.54041	3.53144	3.20534	2.97103	2.94267	5.07136	9.0264
	3.54486	3.50387	3.14867	2.95282	2.94047	5.07779	9.13527
	3.55297	3.47314	3.10792	2.9345	2.95393	5.08541	9.22596
	3.56175	3.44802	3.09703	2.91951	2.98072	5.09491	9.30163
	3.57097	3.43535	3.12516	2.90423	3.0223	5.10712	9.36804
	3.5808	3.427	3.20004	2.88884	3.07528	5.12089	9.4255
	3.58977	3.41471	3.30365	2.87256	3.13692	5.13323	9.46542
	3.59596	3.3958	3.39474	2.85879	3.2042	5.14368	9.47443
	3.59905	3.37946	3.46721	2.8473	3.27679	5.15326	9.43373
	3.6029	3.36328	3.52139	2.83986	3.35425	5.1631	9.33397
	3.60838	3.35294	3.55707	2.83576	3.43558	5.1714	9.16522
	3.60422	3.34438	3.57949	2.83603	3.51878	5.1782	8.93056
	3.59349	3.34569	3.59754	2.8401	3.60234	5.18106	8.63768
	3.57908	3.35249	3.62206	2.84744	3.68283	5.17971	8.30143
	3.56344	3.35703	3.66498	2.85877	3.75701	5.17315	7.94578
	3.55016	3.36384	3.73962	2.87329	3.82261	5.16191	7.59543
	3.54279	3.36551	3.85497	2.89219	3.87899	5.14764	7.2645
	3.54351	3.36204	3.98132	2.91418	3.92531	5.13059	6.97401
	3.54636	3.35306	4.11263	2.93882	3.96186	5.11413	6.73802
	3.55875	3.34735	4.24525	2.96452	3.99026	5.10073	6.56934
	3.56722	3.33769	4.37591	2.99061	4.01246	5.09052	6.45104
	3.57451	3.33387	4.5025	3.01498	4.03136	5.08483	6.37983
	3.58103	3.32913	4.62382	3.03612	4.04984	5.08254	6.35555
	3.59165	3.3273	4.73713	3.05259	4.07109	5.08441	6.33664
	3.60595	3.33954	4.83885	3.06402	4.09641	5.08736	6.34495
	3.62055	3.35281	4.9249	3.07034	4.12677	5.08675	6.37112
	3.62849	3.36004	4.98731	3.07195	4.15954	5.08315	6.40362
	3.63116	3.37026	5.02327	3.06987	4.1921	5.07737	6.44825
	3.63001	3.39303	5.03462	3.06699	4.21934	5.06865	6.50109
	3.62488	3.41552	5.02561	3.06363	4.23977	5.05765	6.56162
	3.61421	3.43889	4.99996	3.06093	4.25241	5.04622	6.62362
	3.60186	3.46309	4.95928	3.05985	4.25758	5.03341	6.686
	3.58403	3.49338	4.90446	3.06082	4.25545	5.02031	6.74983
	3.56838	3.53817	4.83736	3.06358	4.24727	5.00772	6.80275
	3.56047	3.58028	4.75962	3.06676	4.23412	4.99332	6.83544
	3.55422	3.6246	4.67683	3.06988	4.21771	4.97395	6.85016
	3.55711	3.66356	4.59585	3.06894	4.19985	4.94442	6.83938
	3.56258	3.69152	4.5227	3.06181	4.18157	4.89877	6.80416
	3.57137	3.69932	4.46296	3.04844	4.16248	4.83638	6.75212
	3.58175	3.68456	4.42064	3.02913	4.14262	4.75481	6.68974
	3.59007	3.65705	4.38497	3.0056	4.1213	4.65274	6.61985
	3.59513	3.62107	4.33446	2.97932	4.09706	4.53221	6.54213
	3.60028	3.59457	4.26653	2.95264	4.06992	4.40367	6.45906
	3.60563	3.56718	4.18012	2.92695	4.0394	4.28163	6.38257
	3.60916	3.53592	4.07618	2.90261	4.00608	4.21181	6.30445
	3.61359	3.49777	3.95383	2.87926	3.97157	4.17185	6.21721
	3.61362	3.45535	3.81209	2.85667	3.93806	4.14221	6.12261
	3.60867	3.41953	3.65011	2.83291	3.90622	4.11892	6.02822
	3.59971	3.39767	3.47013	2.80729	3.8766	4.1029	5.94033
	3.59132	3.39046	3.27677	2.77909	3.8494	4.09247	5.86447
	3.59018	3.39469	3.07753	2.74893	3.8244	4.08803	5.80172
	3.5873	3.40753	2.87907	2.71674	3.80049	4.08862	5.75084
	3.5855	3.42532	2.69744	2.68354	3.77734	4.09413	5.71244
	3.58726	3.446	2.55157	2.64848	3.75387	4.10615	5.68216
	3.58755	3.46988	2.45937	2.61156	3.72799	4.12568	5.65228
	3.58401	3.49879	2.42575	2.5744	3.69858	4.15441	5.62708
	3.57538	3.53479	2.44744	2.53995	3.66494	4.19384	5.60572
	3.56694	3.56302	2.51638	2.5091	3.62691	4.25091	5.58178
	3.55767	3.58753	2.60229	2.48427	3.5843	4.32946	5.55689
	3.55104	3.61047	2.69041	2.46638	3.53806	4.43106	5.53349
	3.54698	3.62885	2.76924	2.45587	3.48975	4.5534	5.50978
	3.54474	3.64566	2.82699	2.45182	3.44163	4.68405	5.48465
	3.54773	3.66963	2.85617	2.45475	3.39653	4.79552	5.45103
	3.55442	3.69938	2.85096	2.46448	3.35759	4.88577	5.40459
	3.56558	3.72949	2.80445	2.47991	3.32931	4.95714	5.35054
	3.57733	3.74716	2.71454	2.50015	3.31555	5.01061	5.29594
	3.59078	3.75247	2.58419	2.52311	3.31873	5.04664	5.24077
	3.61009	3.74937	2.42288	2.54742	3.33924	5.06865	5.18876
	3.62858	3.73061	2.24673	2.57173	3.37649	5.08044	5.14348
	3.64827	3.70518	2.07596	2.59506	3.42693	5.08343	5.10427
	3.66794	3.68033	1.93406	2.61693	3.48991	5.07676	5.06764
	3.68099	3.65062	1.84983	2.63614	3.56397	5.06558	5.04483
	3.68511	3.61547	1.85025	2.65388	3.64633	5.05249	5.0454
	3.68219	3.57286	1.95006	2.6707	3.7331	5.04527	5.06956
	3.67867	3.54199	2.11517	2.68741	3.82245	5.04605	5.12305
	3.67268	3.51949	2.3437	2.70496	3.91094	5.05374	5.20253
	3.66271	3.506	2.60727	2.72355	3.99452	5.06419	5.30494
	3.65393	3.50794	2.88351	2.74372	4.0707	5.07247	5.41538
	3.65172	3.51993	3.16134	2.76526	4.13801	5.07779	5.52505
	3.6493	3.55219	3.43247	2.78638	4.19298	5.07949	5.62659
	3.6465	3.59109	3.69252	2.80465	4.23197	5.07662	5.71069
	3.64879	3.63709	3.94093	2.81977	4.25331	5.07083	5.76287
	3.6576	3.69326	4.17609	2.83039	4.25469	5.06403	5.78884
	3.672	3.74815	4.3982	2.83505	4.23509	5.05708	5.78844
	3.68717	3.79521	4.60847	2.83285	4.19236	5.04983	5.76696
	3.70375	3.82308	4.81091	2.82327	4.12832	5.04682	5.73241
	3.7144	3.83345	5.0081	2.80629	4.04305	5.04918	5.68357
	3.71326	3.8388	5.19979	2.78126	3.94082	5.05546	5.63081
	3.69748	3.84416	5.38619	2.74691	3.82709	5.06459	5.58027
	3.67952	3.84604	5.5641	2.70295	3.71013	5.07673	5.53531
	3.65628	3.83657	5.7313	2.64894	3.60017	5.09155	5.50263
	3.638	3.81758	5.88479	2.58498	3.5086	5.11011	5.4925
	3.63185	3.78294	6.02256	2.51206	3.44431	5.13126	5.5015
	3.64473	3.74595	6.14039	2.43249	3.41395	5.15138	5.53388
	3.6729	3.72237	6.23273	2.35068	3.40923	5.17088	5.59198
	3.7103	3.68784	6.29549	2.2716	3.42144	5.18795	5.62696
	3.75092	3.64832	6.3242	2.19986	3.44407	5.20034	5.63242
	3.77533	3.60871	6.31488	2.14002	3.46973	5.20434	5.6037
	3.78781	3.57547	6.26522	2.09396	3.4898	5.19844	5.53012
	3.7866	3.55926	6.17294	2.05966	3.50188	5.18591	5.41238
	3.77335	3.55267	6.03772	2.03448	3.50276	5.17019	5.26122
	3.74763	3.55139	5.86151	2.01564	3.49072	5.15217	5.08413
	3.71105	3.54705	5.6492	2.0025	3.46305	5.13429	4.90422
	3.67248	3.53306	5.40805	1.99555	3.41878	5.11772	4.75007
	3.63922	3.52168	5.14962	1.9958	3.35731	5.10732	4.65286
	3.61331	3.52375	4.88649	2.00962	3.27811	5.10045	4.58655
	3.60046	3.53561	4.62892	2.0305	3.18128	5.09403	4.57148
	3.59305	3.56299	4.38524	2.05223	3.0703	5.08985	4.61563
	3.58465	3.61342	4.1603	2.08176	2.9486	5.08351	4.69655
	3.57658	3.67162	3.94762	2.11971	2.82181	5.07777	4.80803
	3.57247	3.70947	3.72407	2.16439	2.69679	5.07285	4.94922
	3.56802	3.73866	3.48654	2.21593	2.58136	5.06882	5.12247
	3.56578	3.76299	3.2439	2.27436	2.48406	5.06586	5.30898
	3.56519	3.77577	3.00443	2.33892	2.41269	5.06174	5.50235
	3.56894	3.77092	2.78056	2.40984	2.36069	5.05578	5.69531
	3.57419	3.74832	2.58514	2.48619	2.3107	5.04597	5.874
	3.5726	3.71943	2.43174	2.56741	2.26539	5.03597	6.01777
	3.56579	3.70009	2.30945	2.65248	2.22445	5.02727	6.12955
	3.55796	3.67602	2.2101	2.73947	2.1908	5.02185	6.20703
	3.54782	3.647	2.13693	2.82484	2.16735	5.02173	6.25664
	3.53451	3.61274	2.0909	2.90653	2.15846	5.02814	6.28059
	3.52247	3.58282	2.06266	2.98294	2.1687	5.03531	6.29397
	3.52136	3.55588	2.04379	3.05204	2.2025	5.04206	6.30936
	3.52923	3.53114	2.03296	3.11225	2.2626	5.04481	6.31944
	3.53978	3.52382	2.03001	3.1626	2.35035	5.04268	6.32851
	3.54742	3.53451	2.01909	3.20249	2.45123	5.03855	6.34192
	3.55504	3.54992	1.99474	3.23183	2.55349	5.03142	6.36374
	3.5629	3.56854	1.96838	3.25031	2.65586	5.02426	6.39542
	3.56191	3.58577	1.95706	3.25804	2.75541	5.01835	6.43702
	3.55648	3.59788	1.98038	3.25692	2.85242	5.01171	6.48092
	3.5517	3.60171	2.05807	3.248	2.94575	5.00342	6.51637
	3.54817	3.60722	2.20716	3.23304	3.03347	4.99342	6.53421
	3.54642	3.60057	2.41857	3.21414	3.11598	4.98149	6.53561
	3.54433	3.57753	2.64607	3.19322	3.1942	4.96871	6.51957
	3.54342	3.54068	2.86892	3.17045	3.26837	4.95689	6.49205
	3.54289	3.49871	3.07946	3.14678	3.34014	4.94868	6.4682
	3.53656	3.46595	3.2705	3.12345	3.41042	4.94409	6.45652
	3.52862	3.44138	3.43489	3.10098	3.47823	4.94102	6.44846
	3.52401	3.42007	3.56508	3.08169	3.54195	4.93856	6.42913
	3.52009	3.41522	3.65729	3.0682	3.60079	4.9353	6.39076
	3.51569	3.42438	3.70704	3.0615	3.6539	4.93507	6.33021
	3.51025	3.43108	3.71115	3.06204	3.70112	4.94234	6.24512
	3.50717	3.43411	3.66996	3.07054	3.73905	4.95209	6.14944
	3.51172	3.42624	3.58791	3.0836	3.7673	4.96098	6.05311
	3.52437	3.40584	3.47396	3.09929	3.78538	4.96864	5.96982
	3.54302	3.38784	3.34044	3.11239	3.79247	4.9772	5.90703
	3.56838	3.37895	3.20208	3.11986	3.78856	4.98811	5.87758
	3.6002	3.38449	3.07363	3.12084	3.77414	4.9988	5.89551
	3.63461	3.39927	2.9696	3.11662	3.74942	5.0075	5.92413
	3.6656	3.40936	2.89917	3.10771	3.71726	5.01297	5.9588
	3.68735	3.42305	2.84774	3.09714	3.6805	5.01548	5.98178
	3.69933	3.42789	2.80611	3.08647	3.64131	5.01539	5.99019
	3.69708	3.41886	2.76944	3.0781	3.60325	5.01424	5.99357
	3.68268	3.41051	2.73403	3.07215	3.57009	5.01567	6.00744
	3.66914	3.41257	2.6968	3.06728	3.5431	5.01741	6.05244
	3.65376	3.41683	2.65539	3.06305	3.52467	5.01539	6.12773
	3.64787	3.41998	2.60956	3.05949	3.51585	5.00875	6.20908
	3.63815	3.41864	2.56296	3.05796	3.5153	4.99999	6.28415
	3.63198	3.41229	2.51811	3.05939	3.51988	4.98829	6.34647
	3.62611	3.40614	2.47714	3.06498	3.5257	4.9728	6.38734
	3.6231	3.39186	2.44458	3.07541	3.53051	4.95553	6.39942
	3.61986	3.37565	2.42187	3.09048	3.53442	4.93717	6.38423
	3.61702	3.36697	2.41267	3.11084	3.53655	4.92039	6.34558
	3.61224	3.35936	2.42101	3.13567	3.53295	4.90874	6.28433
	3.60045	3.35383	2.44782	3.16197	3.52054	4.90412	6.2039
	3.59175	3.35076	2.49402	3.18822	3.50002	4.90363	6.11369
	3.58326	3.34905	2.55446	3.21206	3.47079	4.90804	6.02212
	3.57411	3.34365	2.61955	3.23087	3.43292	4.9167	5.93434
	3.56001	3.34004	2.68228	3.24294	3.38724	4.92829	5.85513
	3.54979	3.34575	2.73999	3.24816	3.33552	4.94232	5.80104
	3.54257	3.34746	2.79092	3.24472	3.27993	4.95928	5.79109
	3.53888	3.34807	2.83462	3.23278	3.22285	4.9776	5.82843
	3.53733	3.36142	2.87127	3.21241	3.16778	4.99685	5.92353
	3.5354	3.39444	2.90102	3.18465	3.11566	5.01322	6.05362
	3.53783	3.43744	2.92103	3.15104	3.06649	5.02605	6.20887
	3.54103	3.4736	2.92534	3.11471	3.01783	5.03384	6.36563
	3.54388	3.51469	2.91177	3.07796	2.96879	5.03564	6.51831
	3.54834	3.56166	2.87885	3.04406	2.91828	5.03008	6.66411
	3.55369	3.61071	2.82723	3.01796	2.86622	5.02132	6.80322
	3.56105	3.6637	2.76093	3.00177	2.81331	5.01465	6.93884
	3.57381	3.73326	2.69028	2.99702	2.76062	5.01107	7.06631
	3.58742	3.81068	2.62951	3.0007	2.71152	5.01052	7.18177
	3.59795	3.90069	2.59894	3.00949	2.66992	5.00961	7.28213
	3.606	3.99284	2.6183	3.01708	2.63946	5.01229	7.36596
	3.61126	4.08612	2.70239	3.02015	2.62401	5.01864	7.42483
	3.62115	4.18326	2.85426	3.0175	2.62626	5.02821	7.44472
	3.63327	4.28002	3.07762	3.00799	2.64632	5.03575	7.41658
	3.648	4.35428	3.33386	2.99284	2.6804	5.04156	7.34083
	3.65096	4.41946	3.59877	2.97299	2.72777	5.04748	7.21666
	3.64362	4.48517	3.86624	2.94958	2.78459	5.05285	7.05651
	3.63051	4.56344	4.12962	2.92464	2.84615	5.0554	6.88754
	3.61094	4.65167	4.38237	2.90088	2.90995	5.05571	6.73461
	3.58403	4.73384	4.62041	2.88025	2.97404	5.05325	6.59962
	3.55896	4.8131	4.83918	2.86403	3.03566	5.04999	6.47613
	3.54492	4.89493	5.0383	2.85425	3.09387	5.04316	6.3559
	3.53834	4.94865	5.21555	2.85032	3.14924	5.03392	6.24034
	3.53642	4.99345	5.36991	2.85124	3.20051	5.02378	6.13957
	3.54335	5.02123	5.50116	2.85473	3.24776	5.01294	6.05161
	3.5516	5.02394	5.60927	2.8588	3.29173	5.00097	5.98674
	3.55906	4.99008	5.69047	2.86257	3.33361	4.99308	5.93858
	3.5619	4.92513	5.73939	2.86679	3.37389	4.98903	5.91095
	3.56155	4.83903	5.74944	2.87222	3.41369	4.98765	5.90845
	3.55879	4.74297	5.71919	2.88042	3.45388	4.98955	5.9308
	3.55738	4.63925	5.6478	2.89149	3.49491	4.99473	5.96228
	3.55671	4.54184	5.53389	2.90496	3.53328	5.00347	5.99373
	3.55666	4.43761	5.37996	2.91905	3.56814	5.0152	6.02469
	3.56262	4.32738	5.18995	2.93085	3.59718	5.03159	6.05436
	3.57304	4.1957	4.97011	2.93798	3.61788	5.05181	6.07898
	3.58689	4.07578	4.72767	2.93972	3.62657	5.07361	6.0963
	3.60735	3.94777	4.47539	2.93507	3.62143	5.09272	6.10665
	3.62965	3.8272	4.22903	2.92163	3.60137	5.10778	6.09587
	3.64491	3.72318	4.00488	2.89834	3.56626	5.11805	6.06159
	3.65443	3.64401	3.81576	2.86458	3.51454	5.12424	6.02031
	3.66388	3.59343	3.67257	2.82198	3.4452	5.1265	5.98835
	3.66463	3.55846	3.57937	2.77383	3.3594	5.12534	5.98556
	3.66224	3.53641	3.53601	2.72556	3.2601	5.11915	6.03696
	3.65174	3.52483	3.51376	2.67976	3.15319	5.10681	6.15523
	3.63249	3.51574	3.50591	2.63943	3.04401	5.0885	6.31255
	3.60889	3.5036	3.51075	2.60525	2.94278	5.06379	6.4891
	3.58651	3.49719	3.51127	2.57872	2.86099	5.03305	6.6706
	3.56917	3.50998	3.49816	2.55897	2.80899	4.99829	6.82886
	3.55666	3.54179	3.46523	2.54585	2.79532	4.9569	6.95568
	3.54842	3.58884	3.4093	2.53766	2.81244	4.90632	7.04845
	3.54224	3.64607	3.32794	2.53478	2.83401	4.84482	7.11266
	3.53747	3.71768	3.22123	2.5349	2.85871	4.77194	7.15594
	3.52991	3.79569	3.0939	2.53843	2.88442	4.69127	7.17301
	3.5228	3.88983	2.95305	2.54385	2.90781	4.61052	7.16283
	3.51817	4.00186	2.80682	2.55155	2.92652	4.53597	7.13505
	3.5123	4.12822	2.66603	2.55998	2.9395	4.46968	7.10484
	3.50657	4.24253	2.54014	2.56939	2.94791	4.42535	7.08665
	3.50318	4.33403	2.43204	2.57661	2.95056	4.38728	7.09484
	3.50037	4.39658	2.34226	2.58198	2.94639	4.34794	7.14458
	3.49883	4.42763	2.26754	2.58482	2.93486	4.30964	7.21811
	3.49929	4.42216	2.19954	2.58789	2.91717	4.27305	7.28157
	3.5002	4.39194	2.13465	2.59169	2.8939	4.23852	7.31838
	3.50493	4.35047	2.07562	2.5987	2.86602	4.20749	7.32417
	3.51488	4.29381	2.02988	2.60937	2.83399	4.18314	7.30115
	3.52968	4.23295	2.00489	2.6252	2.80003	4.16873	7.24847
	3.54926	4.16603	2.00761	2.64658	2.76615	4.16719	7.17363
	3.57031	4.09817	2.03975	2.67115	2.7331	4.18152	7.08578
	3.58837	4.03902	2.09523	2.69955	2.70194	4.21125	6.98983
	3.59249	3.9852	2.15845	2.7319	2.67268	4.25614	6.90703
	3.58479	3.9324	2.22546	2.76801	2.64582	4.31637	6.8528
	3.56986	3.87081	2.2908	2.80666	2.61827	4.39055	6.84521
	3.55643	3.80426	2.34987	2.84721	2.58898	4.47862	6.89165
	3.54423	3.74151	2.39522	2.88849	2.55946	4.57984	6.97992
	3.53519	3.68357	2.42586	2.92975	2.53428	4.6688	7.042
	3.53259	3.63411	2.44211	2.97014	2.51907	4.72724	7.08877
	3.53359	3.60093	2.44798	3.00799	2.5199	4.77652	7.12382
	3.53542	3.56578	2.44738	3.04423	2.54254	4.81766	7.14688
	3.53477	3.53277	2.44438	3.079	2.58903	4.85489	7.15649
	3.54001	3.49934	2.44324	3.11247	2.65642	4.89098	7.14995
	3.54899	3.46175	2.44593	3.14481	2.73586	4.92268	7.12343
	3.5598	3.42039	2.45533	3.17552	2.82536	4.95496	7.067
	3.56932	3.39333	2.47375	3.20438	2.92216	4.98579	6.98117
	3.5727	3.37889	2.4988	3.22996	3.02287	5.01141	6.87237
	3.57115	3.37565	2.52431	3.25241	3.12441	5.0296	6.75509
	3.56741	3.38011	2.54897	3.27019	3.22536	5.04446	6.63765
	3.56148	3.39055	2.56853	3.28371	3.32226	5.0551	6.51551
	3.55478	3.40599	2.58069	3.29297	3.41229	5.06216	6.38833
	3.54635	3.42136	2.58499	3.29975	3.49344	5.06417	6.26904
	3.54188	3.43433	2.58588	3.30532	3.56478	5.0611	6.1711
	3.54002	3.44391	2.58812	3.31158	3.62411	5.05556	6.08872
	3.54038	3.44217	2.60016	3.31951	3.67134	5.05141	6.00244
	3.54041	3.42597	2.62875	3.32929	3.70512	5.05216	5.89623
	3.54147	3.40711	2.67304	3.33973	3.72496	5.05889	5.7765
	3.54768	3.38593	2.72151	3.34816	3.7308	5.07365	5.64931
	3.55217	3.37715	2.77234	3.35537	3.72282	5.09373	5.53516
	3.55224	3.36883	2.8251	3.36052	3.70126	5.11753	5.45988
	3.5526	3.37294	2.87537	3.36388	3.66657	5.14127	5.44881
	3.55384	3.38426	2.91351	3.36449	3.61907	5.16398	5.53432
	3.5543	3.39346	2.93105	3.36074	3.55969	5.18349	5.71766
	3.55314	3.39786	2.92366	3.35194	3.48959	5.20058	5.97108
	3.55448	3.40847	2.89042	3.33782	3.4119	5.21431	6.23925
	3.55746	3.41037	2.83527	3.31861	3.32829	5.22381	6.4974
	3.55844	3.41007	2.76566	3.29616	3.24008	5.22864	6.7382
	3.55722	3.40427	2.69259	3.27419	3.15001	5.23142	6.95328
	3.55381	3.38797	2.63024	3.25655	3.05901	5.2294	7.14258
	3.55095	3.35831	2.59237	3.24598	2.96947	5.2218	7.3051
	3.55037	3.3354	2.59368	3.24426	2.88291	5.20733	7.43335
	3.55212	3.31548	2.6417	3.25028	2.80059	5.18863	7.53109
	3.55705	3.3086	2.6993	3.26263	2.72378	5.16933	7.60695
	3.5617	3.31325	2.76297	3.28059	2.6531	5.15051	7.67115
	3.56813	3.32654	2.82816	3.3034	2.5893	5.13366	7.73195
	3.57864	3.35565	2.8962	3.32951	2.53347	5.11836	7.78465
	3.58829	3.3925	2.96471	3.35732	2.48777	5.10354	7.82533
	3.59705	3.42748	3.03235	3.38567	2.45663	5.08887	7.85397
	3.60575	3.45558	3.09998	3.41195	2.43973	5.07504	7.86857
	3.61359	3.48174	3.16986	3.43546	2.43882	5.06107	7.86627
	3.61781	3.50571	3.24466	3.45538	2.45153	5.04796	7.84706
	3.6125	3.52457	3.31353	3.47238	2.47852	5.03681	7.81095
	3.59962	3.53597	3.35696	3.48586	2.51384	5.02616	7.74717
	3.5909	3.54474	3.37408	3.49645	2.55822	5.01852	7.65529
	3.58446	3.55438	3.366	3.50281	2.6089	5.01392	7.54772
	3.57731	3.54689	3.33394	3.50578	2.66491	5.01307	7.44201
	3.57298	3.53513	3.28013	3.50485	2.72432	5.01767	7.35776
	3.5687	3.52262	3.20926	3.50089	2.78613	5.0261	7.30422
	3.56245	3.50566	3.12662	3.49285	2.84894	5.03771	7.27484
	3.5579	3.48633	3.03987	3.48221	2.9118	5.0544	7.26603
	3.55096	3.46767	2.95896	3.46884	2.97336	5.07134	7.27762
	3.53744	3.45456	2.89464	3.45408	3.0337	5.08909	7.30038
	3.52369	3.43619	2.85768	3.43791	3.09323	5.10885	7.33877
	3.51085	3.41462	2.86007	3.42106	3.15309	5.12765	7.39209
	3.50163	3.40048	2.9089	3.40209	3.21345	5.14833	7.429
	3.49811	3.38753	2.9965	3.38178	3.27647	5.16913	7.43509
	3.49613	3.37314	3.11423	3.35985	3.34323	5.18884	7.41168
	3.4893	3.37171	3.26215	3.33757	3.41452	5.2058	7.35537
	3.48153	3.37294	3.41911	3.31591	3.48935	5.22082	7.26372
	3.47961	3.36931	3.56907	3.29758	3.56793	5.23229	7.13838
	3.48085	3.37073	3.7103	3.28288	3.64774	5.24045	6.97804
	3.48651	3.38134	3.84922	3.27262	3.72635	5.24388	6.78381
	3.48764	3.39076	3.98421	3.2659	3.80112	5.24202	6.56304
	3.48859	3.40288	4.1191	3.26087	3.87314	5.23609	6.32787
	3.49752	3.41664	4.25962	3.2566	3.94209	5.22502	6.10691
	3.51457	3.42912	4.39952	3.25175	4.0032	5.20767	5.92708
	3.53409	3.42932	4.5316	3.24573	4.05774	5.18541	5.77567
	3.55212	3.41735	4.65924	3.23734	4.10714	5.15758	5.66941
	3.57227	3.39886	4.77002	3.22828	4.15047	5.12668	5.60847
	3.58551	3.38268	4.85856	3.22004	4.18622	5.09748	5.59589
	3.59433	3.36312	4.92372	3.21461	4.21408	5.06978	5.62601
	3.60241	3.35174	4.9622	3.21146	4.2332	5.04352	5.68036
	3.59599	3.34111	4.97129	3.21143	4.24494	5.01922	5.7418
	3.58437	3.33514	4.9522	3.21455	4.2497	4.99773	5.81792
	3.56843	3.34419	4.90599	3.22112	4.24866	4.9798	5.90154
	3.55187	3.35644	4.83514	3.22975	4.24226	4.96667	5.9977
	3.54085	3.36904	4.74272	3.24044	4.23263	4.96274	6.10974
	3.53739	3.38528	4.63437	3.25188	4.22081	4.96638	6.24159
	3.54184	3.40808	4.51893	3.26419	4.20872	4.97629	6.3868
	3.54648	3.44128	4.40269	3.27561	4.19584	4.99271	6.53448
	3.55203	3.48042	4.29016	3.2861	4.18353	5.01703	6.67969
	3.55962	3.5241	4.18311	3.29558	4.17232	5.04305	6.81676
	3.56634	3.5642	4.05768	3.30379	4.16242	5.066	6.94248
	3.57404	3.60848	3.91027	3.3113	4.15267	5.08565	7.06082
	3.57633	3.66576	3.74419	3.31887	4.14296	5.10346	7.17903
	3.57133	3.73955	3.56021	3.32787	4.13069	5.11667	7.29543
	3.56375	3.8153	3.3649	3.33916	4.1145	5.12405	7.40198
	3.55663	3.87873	3.17011	3.35341	4.09334	5.12764	7.4912
	3.55216	3.93677	2.9872	3.37127	4.06548	5.12523	7.55627
	3.54789	3.99394	2.82731	3.39385	4.03003	5.11595	7.5895
	3.54282	4.05027	2.70348	3.42133	3.98544	5.10215	7.59736
	3.5396	4.09483	2.62236	3.45345	3.93079	5.08733	7.58883
	3.53632	4.13018	2.57033	3.48878	3.86518	5.07419	7.57229
	3.53793	4.15238	2.52799	3.52681	3.78796	5.06386	7.54652
	3.54276	4.16255	2.49598	3.56583	3.69847	5.05781	7.50859
	3.5515	4.16676	2.48595	3.60436	3.59793	5.05364	7.45817
	3.56034	4.16744	2.50345	3.64042	3.48679	5.04952	7.39793
	3.57011	4.16236	2.55039	3.67249	3.36821	5.04535	7.32108
	3.58285	4.149	2.63172	3.6985	3.24738	5.04242	7.21493
	3.60294	4.12535	2.73629	3.71724	3.13052	5.04116	7.06966
	3.62389	4.09252	2.84381	3.72732	3.02451	5.04264	6.88675
	3.64323	4.05881	2.95171	3.72688	2.94012	5.04415	6.66991
	3.65417	4.02726	3.05948	3.71535	2.88703	5.04805	6.42481
	3.6551	3.99203	3.1702	3.69234	2.87263	5.05198	6.16364
	3.64929	3.94897	3.28386	3.6578	2.90178	5.05602	5.90256
	3.64269	3.90534	3.40031	3.61182	2.9578	5.06057	5.65882
	3.63262	3.85772	3.52137	3.55439	3.02204	5.06556	5.46321
	3.61778	3.80127	3.647	3.48619	3.09316	5.07141	5.32025
	3.60373	3.7376	3.77539	3.40859	3.16748	5.07962	5.16557
	3.58957	3.66986	3.90192	3.32453	3.24219	5.09011	5.0166
	3.58235	3.60604	4.01966	3.23565	3.31453	5.10183	4.87276
	3.58271	3.54241	4.12396	3.14574	3.38335	5.11346	4.7421
	3.58546	3.48837	4.21193	3.05768	3.44632	5.12373	4.63949
	3.59527	3.44421	4.27996	2.97569	3.50168	5.13121	4.58325
	3.61183	3.40154	4.32417	2.90192	3.54832	5.13548	4.58801
	3.62786	3.37262	4.3398	2.83944	3.58604	5.13585	4.66406
	3.63908	3.35214	4.32129	2.78785	3.61376	5.13556	4.76218
	3.64053	3.3403	4.26526	2.74229	3.63133	5.13461	4.88203
	3.6324	3.34091	4.16926	2.70221	3.63927	5.13399	5.01288
	3.61735	3.34707	4.03365	2.6692	3.6383	5.13532	5.14287
	3.60275	3.35133	3.86349	2.64315	3.62888	5.13871	5.2741
	3.59044	3.36044	3.66838	2.62445	3.61261	5.14309	5.40597
	3.58212	3.37075	3.46587	2.61342	3.59135	5.1507	5.53506
	3.57592	3.37699	3.27604	2.61008	3.56709	5.1596	5.65504
	3.57171	3.37387	3.12188	2.61318	3.54223	5.16452	5.76215
	3.56628	3.37176	3.02725	2.61984	3.51876	5.16507	5.8515
	3.5579	3.36413	3.00894	2.62744	3.49959	5.16422	5.92146
	3.54706	3.35156	3.06366	2.63514	3.48723	5.16275	5.97727
	3.5355	3.34295	3.2047	2.64248	3.48339	5.16066	6.02202
	3.53023	3.34069	3.41225	2.64869	3.48859	5.15702	6.05852
	3.53044	3.33945	3.6515	2.65354	3.5029	5.15262	6.08255
	3.53192	3.33773	3.90887	2.65705	3.52544	5.15001	6.08898
	3.53373	3.33138	4.1791	2.6603	3.55506	5.15125	6.08344
	3.53364	3.31611	4.45537	2.66457	3.58975	5.15702	6.0741
	3.5364	3.30855	4.73309	2.67195	3.62694	5.16952	6.06849
	3.5377	3.32394	5.00756	2.68359	3.66404	5.18603	6.07442
	3.53779	3.35589	5.27335	2.70165	3.69934	5.20388	6.09671
	3.53344	3.40616	5.52176	2.72716	3.73148	5.21993	6.13859
	3.52662	3.47787	5.7441	2.7598	3.75825	5.23252	6.19211
	3.51828	3.56246	5.93375	2.79604	3.77794	5.24089	6.24837
	3.51188	3.64115	6.08623	2.83331	3.78963	5.24514	6.2912
	3.50902	3.72432	6.19721	2.86853	3.79155	5.24574	6.31454
	3.50651	3.78568	6.26565	2.89896	3.78299	5.24397	6.31963
	3.5029	3.79961	6.29014	2.92281	3.76362	5.24208	6.30595
	3.49808	3.78769	6.27149	2.93857	3.73356	5.24293	6.27761
	3.49499	3.77883	6.21103	2.94554	3.69257	5.24583	6.23931
	3.49651	3.78633	6.11059	2.94321	3.64054	5.2524	6.19876
	3.50687	3.79235	5.97245	2.93152	3.57868	5.26253	6.16331
	3.52764	3.79788	5.80009	2.91067	3.50712	5.27103	6.12882
	3.56071	3.78922	5.59914	2.8824	3.42826	5.2785	6.0877
	3.59981	3.76641	5.37456	2.84751	3.34403	5.28304	6.04559
	3.63336	3.73437	5.1339	2.80926	3.25797	5.28627	5.99992
	3.65506	3.70182	4.8869	2.77054	3.17196	5.29196	5.95199
	3.6674	3.67414	4.64514	2.73624	3.09067	5.29937	5.90971
	3.67216	3.64424	4.42027	2.71077	3.017	5.30538	5.8809
	3.66857	3.62205	4.22577	2.69855	2.95304	5.30806	5.87118
	3.65948	3.59473	4.0734	2.70546	2.90158	5.30565	5.87175
	3.65455	3.5662	3.95618	2.73208	2.86521	5.29891	5.88361
	3.65387	3.53871	3.82985	2.77327	2.84288	5.28857	5.90271
	3.6513	3.51568	3.69204	2.8217	2.83418	5.27379	5.93965
	3.65143	3.49552	3.54057	2.8711	2.83914	5.25445	5.98107
	3.64987	3.47468	3.38022	2.91805	2.85362	5.2329	6.0379
	3.64912	3.46572	3.21906	2.96045	2.87621	5.21002	6.11425
	3.65454	3.46856	3.06719	2.99584	2.90363	5.18731	6.22005
	3.66294	3.47152	2.93693	3.023	2.9332	5.16753	6.32534
	3.67742	3.48124	2.84135	3.04144	2.96414	5.1495	6.42037
	3.69425	3.49734	2.78918	3.05313	2.99447	5.13329	6.50169
	3.71672	3.51446	2.77094	3.05962	3.02316	5.11668	6.55958
	3.73314	3.52993	2.78245	3.06343	3.0495	5.09819	6.59372
	3.74219	3.54682	2.81348	3.06824	3.07307	5.07818	6.60591
	3.73787	3.56369	2.8388	3.07796	3.09462	5.06156	6.59634
	3.71423	3.58462	2.85507	3.09644	3.11387	5.04918	6.57985
	3.68232	3.61004	2.86383	3.12482	3.13093	5.03964	6.57428
	3.64639	3.63839	2.86871	3.16127	3.14614	5.03133	6.59433
	3.62129	3.67842	2.87315	3.20242	3.15879	5.02129	6.64529
	3.61298	3.7284	2.88294	3.24651	3.16901	5.00836	6.70651
	3.61218	3.79791	2.90482	3.29343	3.17594	4.99259	6.77913
	3.61327	3.87277	2.94377	3.34319	3.17903	4.97778	6.8693
	3.61158	3.93879	2.98276	3.39549	3.17619	4.965	6.98253
	3.60476	3.99357	3.01312	3.4499	3.16772	4.95225	7.08858
	3.58599	4.03911	3.03516	3.50653	3.15485	4.94048	7.17695
	3.56677	4.08311	3.04527	3.56465	3.13988	4.93184	7.24692
	3.55115	4.12312	3.0398	3.62315	3.12582	4.92554	7.29995
	3.5389	4.15799	3.02018	3.68137	3.11688	4.92177	7.33646
	3.5327	4.18753	2.98684	3.73879	3.11863	4.92015	7.35369
	3.532	4.20734	2.93983	3.79403	3.13678	4.92025	7.35808
	3.5271	4.21642	2.88379	3.84685	3.17675	4.92358	7.34626
	3.52495	4.22496	2.82444	3.89673	3.24109	4.9311	7.31906
	3.52223	4.21931	2.76598	3.94349	3.32753	4.94115	7.26215
	3.52113	4.19279	2.71031	3.98705	3.42255	4.95099	7.17371
	3.52194	4.14648	2.65261	4.02698	3.51735	4.95987	7.0593
	3.52112	4.07513	2.5957	4.06307	3.61121	4.96988	6.92217
	3.52053	4.00651	2.5468	4.09508	3.70103	4.98179	6.76717
	3.51844	3.93452	2.51422	4.12291	3.78383	4.99421	6.60846
	3.51161	3.86815	2.50538	4.14669	3.85818	5.00727	6.45926
	3.50405	3.80818	2.52351	4.16658	3.9231	5.02169	6.3308
	3.4997	3.75737	2.56286	4.18267	3.97688	5.03543	6.23136
	3.49981	3.72068	2.60979	4.19515	4.01747	5.0451	6.16063
	3.50801	3.70096	2.66169	4.20418	4.0442	5.05012	6.09323
	3.52433	3.70142	2.71675	4.2103	4.05634	5.052	6.03254
	3.54313	3.70663	2.77286	4.21277	4.05166	5.05051	5.98004
	3.55653	3.70623	2.82793	4.21173	4.03027	5.04502	5.93578
	3.55924	3.68354	2.88072	4.20743	3.99162	5.03668	5.89883
	3.55155	3.65622	2.92908	4.20004	3.93532	5.02605	5.86084
	3.53775	3.64408	2.96488	4.18907	3.86122	5.01526	5.81974
	3.5233	3.63769	2.98042	4.17538	3.77154	5.00337	5.75472
	3.51429	3.62069	2.97715	4.15984	3.66771	4.98935	5.65572
	3.51152	3.58909	2.95649	4.14268	3.55346	4.97369	5.53314
	3.51428	3.55376	2.92127	4.12492	3.43234	4.95637	5.39675
	3.52233	3.50786	2.87748	4.10821	3.31068	4.94128	5.25731
	3.53032	3.49746	2.83341	4.09294	3.19494	4.92737	5.12877
	3.53573	3.47412	2.79567	4.07952	3.09188	4.91628	5.03113
	3.53724	3.45542	2.77106	4.06905	3.00611	4.90825	4.97307
	3.53394	3.44165	2.74657	4.06051	2.93758	4.90353	4.96099
	3.52472	3.43245	2.6969	4.05391	2.88467	4.89985	4.9509
	3.51327	3.42654	2.62849	4.04825	2.84405	4.89669	4.93711
	3.50327	3.435	2.55262	4.04265	2.81648	4.8952	4.92091
	3.49385	3.44859	2.48202	4.03501	2.80431	4.89567	4.90488
	3.48774	3.4579	2.43542	4.02424	2.81	4.89996	4.8811
	3.48202	3.45874	2.43165	4.00875	2.83385	4.90742	4.83504
	3.47714	3.4529	2.48583	3.98755	2.87531	4.91629	4.7681
	3.4741	3.4495	2.57416	3.95946	2.93662	4.9275	4.6825
	3.47427	3.44844	2.69493	3.9253	3.01478	4.94274	4.58835
	3.47491	3.4435	2.82838	3.88591	3.10115	4.96189	4.49969
	3.47811	3.43389	2.9538	3.84427	3.18827	4.98287	4.42947
	3.488	3.42362	3.06495	3.80193	3.27245	5.00572	4.39688
	3.5002	3.41912	3.16014	3.76124	3.34861	5.02802	4.43113
	3.51573	3.41395	3.24127	3.72494	3.4156	5.04738	4.52005
	3.5304	3.41175	3.30911	3.69536	3.47171	5.06423	4.6365
	3.54752	3.4174	3.36833	3.67418	3.51561	5.07746	4.76888
	3.56518	3.43137	3.42434	3.66129	3.54539	5.08781	4.89698
	3.57489	3.43537	3.48236	3.65653	3.56145	5.09473	5.00386
	3.57951	3.43116	3.54631	3.65973	3.56334	5.0973	5.08645
	3.58524	3.4263	3.61911	3.66983	3.55034	5.09078	5.14772
	3.58436	3.40795	3.68934	3.68455	3.52414	5.07609	5.18948
	3.57916	3.38814	3.75201	3.70273	3.48622	5.05757	5.21895
	3.56831	3.36517	3.8018	3.7226	3.43893	5.03569	5.24208
	3.55772	3.33902	3.83255	3.744	3.38615	5.00942	5.26784
	3.5489	3.32342	3.84644	3.7669	3.33265	4.98192	5.31184
	3.54463	3.31366	3.8472	3.79062	3.28256	4.95604	5.35001
	3.5427	3.30815	3.84256	3.81388	3.24151	4.93147	5.38679
	3.53884	3.3116	3.84428	3.8367	3.21315	4.90812	5.42628
	3.53394	3.31363	3.86457	3.85782	3.19838	4.8876	5.47312
	3.52997	3.32235	3.91503	3.87749	3.194	4.86917	5.52693
	3.52866	3.34119	4.00622	3.89485	3.19476	4.85211	5.59657
	3.53125	3.36798	4.10128	3.91103	3.1937	4.83913	5.69196
	3.53292	3.39606	4.18467	3.92512	3.18799	4.83289	5.81097
	3.5336	3.42081	4.25599	3.93833	3.17521	4.83344	5.93417
	3.53835	3.44302	4.31195	3.94956	3.15379	4.83941	6.04969
	3.54801	3.46453	4.35068	3.9593	3.12244	4.84852	6.15299
	3.56027	3.4833	4.37286	3.96745	3.08088	4.86015	6.23961
	3.57585	3.50866	4.37912	3.97458	3.02997	4.87369	6.3037
	3.59392	3.5516	4.37222	3.97969	2.97108	4.88891	6.34768
	3.61435	3.59677	4.35631	3.98249	2.9072	4.90591	6.3727
	3.63996	3.6421	4.33543	3.98293	2.84339	4.92471	6.37668
	3.66885	3.67856	4.30869	3.97992	2.7864	4.94192	6.36051
	3.69022	3.71349	4.27487	3.973	2.74368	4.95961	6.32536
	3.70065	3.73631	4.23317	3.96114	2.72194	4.97705	6.27728
	3.6967	3.7549	4.1838	3.9439	2.72822	4.98926	6.21872
	3.68079	3.75947	4.12517	3.92148	2.7596	4.99485	6.14978
	3.65838	3.74895	4.05888	3.89529	2.80747	4.99527	6.07144
	3.63132	3.72773	3.98993	3.86617	2.86555	4.99019	5.98658
	3.6005	3.68861	3.92359	3.83434	2.92667	4.9805	5.90226
	3.57815	3.63696	3.86253	3.80071	2.98628	4.96733	5.82829
	3.56768	3.58233	3.80674	3.76726	3.04203	4.95401	5.76569
	3.56034	3.51788	3.75288	3.73416	3.09144	4.93923	5.70784
	3.55533	3.46463	3.70052	3.70198	3.1327	4.92745	5.6616
	3.55334	3.42424	3.65023	3.67114	3.16479	4.91942	5.63305
	3.5543	3.40666	3.59721	3.64251	3.18872	4.91667	5.62928
	3.55515	3.40033	3.53084	3.61512	3.20425	4.91798	5.6506
	3.5557	3.39504	3.45034	3.59003	3.21173	4.92005	5.68826
	3.55593	3.39225	3.35935	3.56712	3.21174	4.92257	5.72292
	3.56132	3.4027	3.26292	3.54703	3.20474	4.92504	5.75241
	3.56737	3.40957	3.16889	3.52886	3.19053	4.92656	5.77401
	3.57065	3.41588	3.08885	3.51274	3.17187	4.92469	5.77898
	3.56686	3.40988	3.03423	3.49648	3.14964	4.92206	5.76578
	3.55912	3.40282	3.01611	3.48066	3.12626	4.92049	5.74074
	3.54736	3.39764	3.03414	3.46369	3.10278	4.92118	5.70292
	3.53242	3.38902	3.07777	3.44418	3.08044	4.92579	5.65909
	3.51876	3.38057	3.12929	3.421	3.06021	4.93403	5.61936
	3.51061	3.36856	3.18317	3.39637	3.04489	4.94611	5.58448
	3.51073	3.35383	3.23462	3.37255	3.0366	4.96337	5.56422
	3.51228	3.34352	3.28605	3.35162	3.03806	4.98531	5.55153
	3.51377	3.35026	3.33804	3.33337	3.05165	5.00531	5.53822
	3.51759	3.36998	3.39027	3.31369	3.08252	5.02315	5.52894
	3.52067	3.411	3.44285	3.29102	3.13299	5.03839	5.51253
	3.52235	3.44174	3.50024	3.26837	3.20393	5.0513	5.49739
	3.52167	3.46911	3.56923	3.24825	3.29589	5.06151	5.48839
	3.52083	3.48257	3.65592	3.23211	3.4046	5.0685	5.47162
	3.51939	3.48155	3.76723	3.21965	3.52418	5.07219	5.43971
	3.51996	3.47339	3.90788	3.20913	3.64728	5.07385	5.39603
	3.52089	3.46731	4.0533	3.19702	3.76787	5.07286	5.34795
	3.52098	3.46375	4.17987	3.17951	3.88105	5.07258	5.3084
	3.52023	3.45106	4.28606	3.15443	3.98677	5.07321	5.28648
	3.51914	3.44786	4.36421	3.11981	4.08325	5.07186	5.2723
	3.51564	3.45211	4.41312	3.0757	4.16782	5.0687	5.27693
	3.51312	3.45359	4.42964	3.02094	4.23972	5.06233	5.30977
	3.51127	3.44147	4.41322	2.95779	4.2987	5.0537	5.37685
	3.50872	3.42094	4.363	2.88969	4.34235	5.04518	5.47944
	3.50502	3.39798	4.28303	2.82193	4.37028	5.03472	5.60773
	3.50195	3.37565	4.17584	2.75981	4.38308	5.02337	5.73477
	3.50298	3.35376	4.04654	2.70766	4.38038	5.0118	5.85463
	3.49767	3.33623	3.90098	2.66995	4.36207	5.0007	5.96503
	3.49207	3.34257	3.74687	2.64932	4.32909	4.99032	6.06309
	3.48698	3.35878	3.58769	2.64763	4.28221	4.97997	6.13661
	3.48232	3.37788	3.4264	2.65057	4.22155	4.9699	6.17907
	3.48063	3.39983	3.26461	2.65401	4.14756	4.96073	6.18185
	3.48405	3.42379	3.10469	2.65201	4.06047	4.9533	6.14572
	3.49352	3.44138	2.94588	2.64264	3.9616	4.94627	6.07353
	3.50738	3.44861	2.79341	2.62439	3.85077	4.94139	5.96672
	3.52048	3.44739	2.65673	2.59516	3.73014	4.93885	5.8279
	3.52796	3.43707	2.54636	2.55608	3.60053	4.93698	5.66529
	3.52988	3.42446	2.4736	2.51204	3.46328	4.93635	5.49498
	3.53106	3.40964	2.45123	2.46756	3.32106	4.9388	5.33261
	3.52608	3.38212	2.48686	2.42767	3.17731	4.9448	5.19179
	3.52003	3.35364	2.55707	2.39569	3.03495	4.95467	5.07638
	3.51461	3.34192	2.63397	2.37302	2.89704	4.96771	4.98426
	3.51605	3.33643	2.71114	2.3556	2.76601	4.98182	4.87281
	3.51941	3.34469	2.78417	2.34068	2.64246	4.99321	4.75518
	3.52393	3.36472	2.85061	2.32836	2.52733	5.00303	4.63617
	3.52827	3.39011	2.90486	2.31821	2.42093	5.0132	4.53108
	3.53311	3.42223	2.94018	2.30785	2.32466	5.02107	4.46249
	3.53749	3.44571	2.95502	2.29305	2.2388	5.02796	4.44268
	3.54153	3.4571	2.9488	2.27099	2.16549	5.03238	4.44382
	3.54409	3.45241	2.92473	2.24217	2.10711	5.0346	4.45773
	3.54653	3.4393	2.88793	2.2081	2.06643	5.03707	4.49161
	3.54512	3.42108	2.8473	2.17291	2.04496	5.03852	4.54618
	3.54072	3.3991	2.81311	2.14045	2.04517	5.04171	4.61724
	3.54026	3.38003	2.79667	2.11463	2.07156	5.04412	4.68224
	3.53836	3.3633	2.80729	2.09645	2.11755	5.04442	4.73283
	3.53643	3.35492	2.85288	2.08699	2.18169	5.04285	4.76885
	3.5325	3.34899	2.93535	2.07894	2.26424	5.03948	4.7919
	3.52801	3.34072	3.04185	2.07235	2.35778	5.03267	4.80125
	3.518	3.33857	3.14236	2.06926	2.45342	5.02584	4.7985
	3.50988	3.34459	3.22608	2.07217	2.54864	5.01833	4.78911
	3.50332	3.34684	3.28655	2.07938	2.64042	5.01083	4.7771
	3.49966	3.34735	3.31805	2.08684	2.72627	5.00308	4.76168
	3.50594	3.35117	3.31662	2.09235	2.80473	4.99443	4.74167
	3.51313	3.35861	3.27847	2.09567	2.87438	4.984	4.70984
	3.52075	3.35888	3.20377	2.09641	2.93333	4.9728	4.6626
	3.5259	3.35095	3.09459	2.09443	2.98149	4.96357	4.6051
	3.53359	3.34098	2.95607	2.08967	3.01836	4.95748	4.53724
	3.53989	3.3343	2.79681	2.08334	3.04412	4.95178	4.458
	3.54022	3.32109	2.62802	2.07632	3.05964	4.94614	4.37707
	3.53562	3.30723	2.46234	2.06989	3.0647	4.94062	4.31093
	3.52989	3.30823	2.31271	2.06499	3.06288	4.93654	4.27187
	3.52314	3.30852	2.18968	2.06324	3.05575	4.93443	4.26039
	3.51283	3.31142	2.10048	2.06456	3.04542	4.9347	4.29024
	3.50636	3.32213	2.04964	2.06954	3.03373	4.93474	4.36747
	3.50132	3.34112	2.01619	2.07785	3.02268	4.9342	4.4471
	3.5007	3.36883	1.98635	2.08584	3.01314	4.93405	4.54897
	3.4979	3.40024	1.9659	2.09346	3.00518	4.93474	4.67484
	3.49111	3.43456	1.95938	2.10001	2.99784	4.93728	4.82626
	3.48199	3.45843	1.97575	2.10553	2.98964	4.94167	5.00656
	3.47311	3.45988	2.02413	2.10862	2.9771	4.94588	5.2045
	3.46603	3.45749	2.11198	2.10825	2.95911	4.94773	5.41646
	3.4651	3.44155	2.22182	2.10331	2.93282	4.9465	5.6327
	3.46641	3.42302	2.33693	2.09445	2.89729	4.94414	5.83213
	3.46678	3.40547	2.45143	2.08153	2.85027	4.9403	6.013
	3.47003	3.38882	2.56577	2.06507	2.79166	4.93385	6.17339
	3.47564	3.36597	2.68178	2.04954	2.71996	4.92323	6.30916
	3.48238	3.34818	2.80363	2.04116	2.63558	4.90823	6.41562
	3.49061	3.33296	2.93846	2.0428	2.53909	4.89287	6.49189
	3.49754	3.31923	3.09248	2.05369	2.43335	4.87956	6.54439
	3.4998	3.31259	3.27011	2.07388	2.32201	4.8712	6.57728
	3.50157	3.3025	3.47158	2.10197	2.21079	4.86906	6.59298
	3.50179	3.2947	3.67313	2.13402	2.10915	4.87343	6.595
	3.49855	3.29297	3.85975	2.16454	2.02946	4.88303	6.58549
	3.49584	3.29698	4.0274	2.1867	1.98058	4.89471	6.56752
	3.49287	3.30163	4.17327	2.19786	1.97091	4.91018	6.54234
	3.48854	3.30833	4.29536	2.19918	1.99897	4.93054	6.51025
	3.48197	3.30587	4.39064	2.19162	2.04302	4.95528	6.48469
	3.47285	3.2991	4.45913	2.17685	2.09709	4.97906	6.48041
	3.46808	3.2905	4.4999	2.15747	2.15811	5.00126	6.49951
	3.46748	3.27631	4.51463	2.13791	2.22529	5.02556	6.52715
	3.47043	3.26281	4.50431	2.12142	2.29407	5.05007	6.55597
	3.47908	3.24735	4.4711	2.10944	2.36116	5.07179	6.58599
	3.49577	3.24079	4.41564	2.10078	2.42385	5.0892	6.61428
	3.51935	3.24392	4.34172	2.09684	2.48312	5.10163	6.63927
	3.5498	3.24969	4.25216	2.09731	2.5389	5.10828	6.66388
	3.58943	3.25527	4.15051	2.09871	2.59278	5.11105	6.68465
	3.63419	3.26108	4.03798	2.0967	2.64666	5.10958	6.69653
	3.6792	3.26896	3.91639	2.08994	2.70278	5.10477	6.7022
	3.70585	3.28237	3.78379	2.07869	2.7617	5.09517	6.70113
	3.71674	3.29597	3.639	2.06259	2.82541	5.08246	6.69116
	3.71684	3.32008	3.48092	2.0428	2.89113	5.07009	6.67525
	3.70287	3.3593	3.31056	2.02193	2.95764	5.05719	6.65192
	3.67426	3.4029	3.13142	2.00415	3.02239	5.04365	6.61963
	3.63289	3.44643	2.94873	1.99183	3.08476	5.03123	6.57955
	3.58991	3.49336	2.76765	1.98909	3.14296	5.01889	6.53715
	3.55828	3.54206	2.59617	1.99846	3.19525	5.00557	6.50432
	3.54042	3.59278	2.43962	2.02248	3.23929	4.99151	6.46921
	3.52744	3.62484	2.29847	2.05945	3.2749	4.97474	6.43793
	3.51703	3.64469	2.17919	2.09849	3.29943	4.96159	6.41555
	3.51261	3.65914	2.09288	2.13189	3.31312	4.95505	6.40062
	3.51123	3.65577	2.0498	2.15667	3.31739	4.95722	6.40422
	3.50665	3.63715	2.05117	2.17108	3.31287	4.96814	6.4347
	3.50304	3.60339	2.06027	2.17542	3.29803	4.98619	6.46482
	3.50007	3.56179	2.07088	2.17097	3.27223	5.00853	6.48864
	3.49565	3.52457	2.08304	2.16145	3.23638	5.03554	6.49626
	3.49384	3.49313	2.09443	2.15092	3.19219	5.06509	6.48158
	3.49469	3.47515	2.10606	2.1434	3.14282	5.09745	6.45376
	3.49734	3.47219	2.11659	2.14049	3.0912	5.13097	6.4186
[truncated: 2,359 more rows]
