# Supplementary material for: Ionogel thin films as a compatibilizing pretreatment for electrospray deposition
Source: Royal Society of Chemistry journal article supplement (doi:10.1039/d5lp00359h), 2026-01-01
Supplement: d5lp00359h1.zip [file D data - aligned.xlsx]

## Sheet: Sheet1
Lateral	Height Data	Height Data	Mean	Standard Deviation
µm	nm	nm	nm	nm
	5.1	5.2	Statistics On Rows of B"Height Data":C"Height Data"	Statistics On Rows of B"Height Data":C"Height Data"
0	0.468391	0.0821619	0.275276	0.273105
1.33274	0.263255	0.342175	0.302715	0.0558045
2.66548	0.444484	0.388456	0.41647	0.039618
3.99822	0.394924	0.830128	0.612526	0.307736
5.33096	0.604856	0.525683	0.565269	0.0559838
6.66371	0.567494	0.582891	0.575193	0.0108873
7.99645	0.893573	0.648936	0.771254	0.172985
9.32919	0.572439	0.854719	0.713579	0.199603
10.6619	0.592474	0.45	0.521237	0.100745
11.9947	0.223757	1.0729	0.64833	0.600438
13.3274	0.482414	0.99376	0.738087	0.361577
14.6602	0.394125	1.18741	0.790769	0.56094
15.9929	0.582872	1.41235	0.997613	0.586533
17.3256	0.30912	1.53186	0.920492	0.864611
18.6584	0.830069	1.78512	1.30759	0.675321
19.9911	0.904946	1.78782	1.34638	0.624286
21.3239	1.12696	1.77784	1.4524	0.460242
22.6566	1.23312	1.75716	1.49514	0.370554
23.9893	1.57861	1.85236	1.71549	0.193568
25.3221	1.26793	2.06039	1.66416	0.560349
26.6548	1.16029	1.86497	1.51263	0.498286
27.9876	1.15569	1.87889	1.51729	0.511379
29.3203	1.14366	1.60836	1.37601	0.328592
30.653	1.0125	1.43098	1.22174	0.295904
31.9858	0.903821	1.36613	1.13497	0.3269
33.3185	1.21838	1.30028	1.25933	0.0579083
34.6513	1.21401	1.36556	1.28978	0.107158
35.984	1.75617	1.06391	1.41004	0.489504
37.3167	1.96158	1.15028	1.55593	0.573681
38.6495	1.92255	1.26811	1.59533	0.462758
39.9822	1.8835	1.16073	1.52212	0.511076
41.315	2.10676	1.32668	1.71672	0.551597
42.6477	1.97007	1.52401	1.74704	0.315415
43.9805	2.47043	1.24099	1.85571	0.86935
45.3132	2.47987	1.48012	1.97999	0.706933
46.6459	2.7191	1.76173	2.24042	0.676964
47.9787	2.30269	1.82343	2.06306	0.338889
49.3114	2.60137	1.90567	2.25352	0.491931
50.6442	2.12867	2.01087	2.06977	0.0832955
51.9769	2.37674	2.01028	2.19351	0.259128
53.3096	2.2393	2.52678	2.38304	0.203283
54.6424	2.32716	2.67208	2.49962	0.243893
55.9751	1.76516	2.40646	2.08581	0.453463
57.3079	1.93415	2.34844	2.14129	0.292948
58.6406	1.86089	2.38897	2.12493	0.373406
59.9733	1.78423	2.28124	2.03274	0.351441
61.3061	1.70873	2.40776	2.05825	0.494288
62.6388	1.63926	1.90532	1.77229	0.188131
63.9716	1.45529	1.91626	1.68577	0.325959
65.3043	1.66552	2.10841	1.88696	0.313166
66.6371	1.77706	2.36112	2.06909	0.412987
67.9698	1.65127	2.66116	2.15622	0.7141
69.3025	1.79177	2.86094	2.32635	0.756015
70.6353	1.58627	2.68346	2.13487	0.775828
71.968	1.79465	2.99531	2.39498	0.848993
73.3008	1.93668	2.9249	2.43079	0.698776
74.6335	2.38561	2.70708	2.54634	0.227315
75.9662	2.50748	2.73151	2.6195	0.158416
77.299	2.78381	2.89233	2.83807	0.076739
78.6317	2.83617	2.81456	2.82536	0.0152859
79.9645	3.15998	2.99719	3.07859	0.115112
81.2972	3.13031	3.19926	3.16478	0.0487538
82.6299	3.49187	2.91196	3.20192	0.410059
83.9627	3.62447	2.88892	3.25669	0.520109
85.2954	3.89102	3.2824	3.58671	0.430358
86.6282	3.91434	3.4649	3.68962	0.317804
87.9609	4.06741	3.53515	3.80128	0.376369
89.2936	4.1091	3.7307	3.9199	0.267569
90.6264	4.29198	3.66602	3.979	0.442626
91.9591	4.36723	3.70634	4.03678	0.467319
93.2919	4.82703	3.60669	4.21686	0.862909
94.6246	4.7787	3.62223	4.20046	0.817744
95.9574	4.81598	3.51451	4.16524	0.920283
97.2901	4.81242	3.66913	4.24078	0.808421
98.6228	4.63869	3.72307	4.18088	0.647439
99.9556	4.30041	3.80037	4.05039	0.353586
101.288	4.32299	3.77999	4.05149	0.383956
102.621	4.36173	4.04193	4.20183	0.226127
103.954	4.30051	4.08908	4.19479	0.149505
105.287	4.27493	4.28571	4.28032	0.0076218
106.619	4.55083	4.63101	4.59092	0.0566916
107.952	4.7575	4.61014	4.68382	0.104198
109.285	4.87933	4.45728	4.6683	0.298435
110.618	5.15603	4.55629	4.85616	0.424079
111.95	5.20005	4.91918	5.05962	0.198606
113.283	5.37107	5.03491	5.20299	0.237703
114.616	5.28604	4.88328	5.08466	0.284794
115.948	5.69014	4.84363	5.26688	0.598571
117.281	5.45494	4.81075	5.13285	0.455511
118.614	5.4418	4.79711	5.11945	0.455865
119.947	5.29449	5.06309	5.17879	0.163621
121.279	5.39884	5.10554	5.25219	0.207396
122.612	5.38859	5.7867	5.58765	0.281507
123.945	5.63606	5.33455	5.48531	0.213198
125.278	5.63664	4.96544	5.30104	0.474608
126.61	5.62806	5.2151	5.42158	0.292008
127.943	5.36221	5.60154	5.48187	0.169232
129.276	5.34831	5.3499	5.34911	0.00112416
130.609	5.35075	5.19481	5.27278	0.110268
131.941	5.99333	4.90695	5.45014	0.768187
133.274	5.62411	5.13186	5.37799	0.348072
134.607	5.58335	5.25738	5.42037	0.230494
135.94	5.39577	5.26399	5.32988	0.0931799
137.272	5.33645	5.2638	5.30013	0.0513679
138.605	5.09096	5.25125	5.1711	0.113344
139.938	5.64947	5.09826	5.37386	0.389761
141.271	5.95529	5.06072	5.508	0.632558
142.603	7.55041	5.03039	6.2904	1.78192
143.936	9.77561	4.89503	7.33532	3.45109
145.269	14.1197	4.92273	9.52124	6.50327
146.602	20.8687	5.1308	12.9997	11.1284
147.934	30.9816	5.3953	18.1885	18.0923
149.267	44.9675	5.70157	25.3345	27.7652
150.6	63.6873	5.90553	34.7964	40.8579
151.932	87.0149	5.99173	46.5033	57.292
153.265	114.283	5.83444	60.0586	76.6846
154.598	138.688	5.82817	72.258	93.9459
155.931	156.575	6.13357	81.3544	106.378
157.263	167.973	6.51761	87.2451	114.166
158.596	171.878	6.9699	89.4239	116.608
159.929	168.518	7.21022	87.8642	114.062
161.262	157.778	7.44712	82.6128	106.3
162.594	140.824	7.76731	74.2957	94.0853
163.927	118.294	8.25466	63.2743	77.8096
165.26	94.1392	7.10409	50.6216	61.5431
166.593	71.202	6.80477	39.0034	45.5357
167.925	55.1	6.30892	30.7045	34.5005
169.258	46.9608	6.03235	26.4966	28.9408
170.591	39.837	5.77554	22.8063	24.0851
171.924	33.6724	5.82489	19.7487	19.6912
173.256	28.7588	6.07874	17.4188	16.0372
174.589	24.2798	6.40684	15.3433	12.6381
175.922	21.2394	6.40852	13.824	10.487
177.255	18.1345	6.56138	12.348	8.18345
178.587	15.8237	6.48391	11.1538	6.60421
179.92	13.9705	6.79774	10.3841	5.07193
181.253	12.6171	6.75578	9.68642	4.14454
182.586	11.4414	6.59939	9.02042	3.42385
183.918	10.7551	6.84781	8.80143	2.76284
185.251	9.75375	7.27011	8.51193	1.7562
186.584	9.01563	7.35606	8.18585	1.17349
187.916	8.53281	7.34201	7.93741	0.842023
189.249	8.29722	7.61304	7.95513	0.483788
190.582	7.79603	7.92779	7.86191	0.0931652
191.915	7.64759	8.15022	7.89891	0.355411
193.247	7.73884	8.39378	8.06631	0.463112
194.58	7.55725	8.52686	8.04206	0.685619
195.913	7.96302	8.67084	8.31693	0.500505
197.246	8.068	8.70372	8.38586	0.449523
198.578	8.335	9.00609	8.67054	0.474534
199.911	8.11826	9.08232	8.60029	0.681696
201.244	8.28181	9.55261	8.91721	0.898594
202.577	8.08779	9.53859	8.81319	1.02587
203.909	8.29062	9.52531	8.90797	0.873055
205.242	8.40692	9.77827	9.09259	0.969688
206.575	8.8078	9.92939	9.36859	0.793085
207.908	8.60682	10.0951	9.35096	1.05237
209.24	8.91403	10.2684	9.59122	0.957688
210.573	8.98371	10.4393	9.71152	1.02928
211.906	9.29577	10.4687	9.88226	0.829423
213.239	9.21341	10.3449	9.77915	0.800079
214.571	9.09863	10.444	9.7713	0.951297
215.904	8.84364	10.5231	9.68337	1.18757
217.237	8.85263	10.0741	9.46337	0.863725
218.57	9.28888	10.2327	9.7608	0.667392
219.902	9.28874	10.1494	9.71907	0.608587
221.235	9.34789	10.0682	9.70802	0.509309
222.568	9.85974	10.2478	10.0538	0.274418
223.9	10.1971	10.3155	10.2563	0.08371
225.233	10.5793	10.1349	10.3571	0.31427
226.566	11.1089	10.2096	10.6592	0.635938
227.899	11.1318	9.9238	10.5278	0.85421
229.231	11.0033	10.2798	10.6416	0.511596
230.564	10.9949	10.2808	10.6378	0.504952
231.897	11.2686	10.6499	10.9592	0.437493
233.23	11.3503	10.3718	10.8611	0.691898
234.562	12.0116	10.1822	11.0969	1.29353
235.895	12.3962	9.86075	11.1285	1.79285
237.228	12.6183	10.0701	11.3442	1.80188
238.561	12.9312	9.97051	11.4509	2.09355
239.893	13.839	10.3244	12.0817	2.48521
241.226	14.4366	10.7724	12.6045	2.59096
242.559	15.1575	11.0417	13.0996	2.91036
243.892	15.3196	11.349	13.3343	2.8076
245.224	14.9977	11.6636	13.3306	2.35757
246.557	14.5685	11.9477	13.2581	1.85321
247.89	14.7029	11.6625	13.1827	2.14986
249.223	14.4428	11.6697	13.0562	1.96089
250.555	14.5606	11.1202	12.8404	2.43275
251.888	14.4651	10.9289	12.697	2.50046
253.221	14.9227	11.0615	12.9921	2.73029
254.554	15.069	11.3731	13.2211	2.61337
255.886	15.3895	11.7644	13.577	2.56337
257.219	15.5095	13.2394	14.3745	1.60524
258.552	15.6813	15.5641	15.6227	0.0828787
259.884	15.9314	19.1353	17.5333	2.26547
261.217	16.5554	24.6327	20.5941	5.71152
262.55	16.9915	33.2074	25.0994	11.4663
263.883	17.7029	45.4342	31.5685	19.609
265.215	18.8304	61.6955	40.263	30.3103
266.548	20.6576	82.3348	51.4962	43.6124
267.881	23.0784	105.722	64.4002	58.4379
269.214	26.4307	127.694	77.0622	71.6039
270.546	30.4601	140.501	85.4807	77.8109
271.879	35.026	143.12	89.0731	76.4341
273.212	39.352	138.307	88.8296	69.9719
274.545	43.1827	126.523	84.8528	58.9304
275.877	44.6009	108.622	76.6113	45.2696
277.21	44.3744	87.9837	66.179	30.8364
278.543	42.583	68.2246	55.4038	18.1314
279.876	39.7127	53.4526	46.5826	9.71563
281.208	37.0218	46.3622	41.692	6.60465
282.541	34.7224	40.822	37.7722	4.31307
283.874	32.7634	35.3308	34.0471	1.81537
285.207	30.8108	30.83	30.8204	0.0136098
286.539	29.3864	27.1929	28.2896	1.55103
287.872	28.0045	24.3414	26.1729	2.59025
289.205	27.1669	21.7859	24.4764	3.8049
290.538	26.7639	19.7877	23.2758	4.93291
291.87	27.1847	17.6332	22.409	6.75393
293.203	27.9381	16.5131	22.2256	8.07872
294.536	29.5134	14.8924	22.2029	10.3386
295.869	31.5042	14.3491	22.9267	12.1305
297.201	34.7003	13.7394	24.2198	14.8216
298.534	38.8265	13.2528	26.0397	18.0833
299.867	43.3713	12.2194	27.7954	22.0277
301.199	46.6118	12.1235	29.3677	24.3869
302.532	48.9466	11.348	30.1473	26.5862
303.865	51.2531	11.1267	31.1899	28.3737
305.198	53.2153	10.7285	31.9719	30.0427
306.53	54.8992	10.6485	32.7738	31.29
307.863	56.8928	10.7663	33.8296	32.6164
309.196	58.2809	10.83	34.5555	33.5529
310.529	59.1319	10.9761	35.054	34.0513
311.861	59.5522	10.8967	35.2244	34.4046
313.194	59.9327	11.1448	35.5388	34.4983
314.527	60.3074	12.0859	36.1966	34.0977
315.86	60.7022	14.8497	37.7759	32.4227
317.192	61.0067	20.0463	40.5265	28.9633
318.525	60.9727	28.7142	44.8434	22.8102
319.858	61.1078	42.6299	51.8688	13.0658
321.191	61.0645	64.6231	62.8438	2.51631
322.523	61.3754	96.8079	79.0917	25.0546
323.856	61.0963	142.017	101.557	57.2194
325.189	61.339	201.416	131.378	99.0497
326.522	61.8511	275.002	168.426	150.72
327.854	63.5382	356.153	209.845	206.91
329.187	66.6859	428.733	247.709	256.006
330.52	72.1408	490.487	281.314	295.815
331.853	81.1237	542.868	311.996	326.503
333.185	95.6905	582.413	339.052	344.165
334.518	117.674	610.599	364.137	348.551
335.851	148.592	625.602	387.097	337.297
337.183	189.366	627.447	408.407	309.77
338.516	240.437	615.469	427.953	265.187
339.849	299.874	591.346	445.61	206.101
341.182	352.956	554.808	453.882	142.731
342.514	392.951	507.817	450.384	81.2225
343.847	422.577	452.238	437.408	20.9737
345.18	442.62	390.898	416.759	36.5734
346.513	452.147	326.698	389.423	88.7061
347.845	448.645	264.859	356.752	129.956
349.178	431.107	209.356	320.232	156.802
350.511	401.263	164.676	282.97	167.292
351.844	361.043	136.525	248.784	158.758
353.176	313.485	114.787	214.136	140.501
354.509	262.905	96.5348	179.72	117.641
355.842	214.864	81.3901	148.127	94.3805
357.175	174.443	68.5348	121.489	74.8886
358.507	149.323	57.6987	103.511	64.7881
359.84	130.649	49.2594	89.9543	57.5514
361.173	114.613	42.2554	78.4342	51.1645
362.506	100.863	36.5035	68.6831	45.5089
363.838	89.3274	31.5098	60.4186	40.8832
365.171	80.0669	27.8448	53.9559	36.9265
366.504	72.2048	24.753	48.4789	33.5535
367.837	65.3463	21.8607	43.6035	30.749
369.169	60.2744	19.9627	40.1185	28.5047
370.502	55.6854	18.7689	37.2272	26.1039
371.835	52.1581	17.476	34.817	24.524
373.167	49.1941	16.8096	33.0019	22.8993
374.5	46.6768	16.34	31.5084	21.4514
375.833	44.2625	16.6389	30.4507	19.5329
377.166	42.6415	18.0218	30.3316	17.4087
378.498	41.0335	21.2864	31.1599	13.9633
379.831	39.9115	26.8567	33.3841	9.23117
381.164	38.8017	38.4283	38.615	0.26403
382.497	38.679	57.9996	48.3393	13.6617
383.829	38.3957	88.1402	63.2679	35.1747
385.162	39.618	131.956	85.7872	65.2932
386.495	42.5851	193.244	117.915	106.532
387.828	48.114	273.252	160.683	159.196
389.16	58.0282	372.868	215.448	222.625
390.493	74.4681	478.988	276.728	286.039
391.826	98.5382	578.984	338.761	339.726
393.159	132.004	672.916	402.46	382.483
394.491	176.61	758.938	467.774	411.768
395.824	231.861	834.703	533.282	426.274
397.157	292.269	899.49	595.879	429.37
398.49	347.386	952.02	649.703	427.541
399.822	397.878	991.665	694.771	419.871
401.155	442.99	1017.67	730.33	406.359
402.488	481.638	1029.46	755.55	387.37
403.821	512.633	1027.5	770.065	364.064
405.153	534.815	1009.97	772.395	335.988
406.486	546.939	977.358	762.149	304.352
407.819	548.332	929.428	738.88	269.476
409.151	537.747	866.913	702.33	232.755
410.484	514.797	790.724	652.76	195.11
411.817	480.253	704.32	592.286	158.439
413.15	435.503	610.016	522.76	123.399
414.482	383.084	512.243	447.663	91.329
415.815	328.633	417.341	372.987	62.7262
417.148	278.198	331.17	304.684	37.4572
418.481	239.168	258.849	249.009	13.9163
419.813	219.337	208.78	214.058	7.46456
421.146	228.392	174.485	201.438	38.1178
422.479	253.926	145.029	199.478	77.0021
423.812	293.598	119.599	206.598	123.036
425.144	346.746	99.6666	223.206	174.712
426.477	396.91	82.3357	239.623	222.438
427.81	441.613	68.6371	255.125	263.734
429.143	478.676	58.0701	268.373	297.413
430.475	505.679	48.9001	277.29	322.992
431.808	520.381	41.9528	281.167	338.3
433.141	521.672	36.5278	279.1	343.049
434.474	508.646	31.5733	270.11	337.341
435.806	481.305	27.3445	254.325	320.998
437.139	440.54	24.1856	232.363	294.407
438.472	388.956	21.2259	205.091	260.024
439.805	330.07	19.3729	174.721	219.696
441.137	269.306	17.5788	143.442	177.998
442.47	212.642	16.3092	114.475	138.828
443.803	165.774	15.494	90.6338	106.264
445.135	137.262	15.1765	76.2193	86.3277
446.468	116.562	15.8511	66.2065	71.2132
447.801	98.8297	18.7104	58.77	56.6529
449.134	84.1047	23.6225	53.8636	42.7674
450.466	71.1871	33.6284	52.4078	26.558
451.799	61.3899	49.7712	55.5805	8.21567
453.132	52.8809	75.9592	64.4201	16.3189
454.465	46.3073	114.362	80.3348	48.1222
455.797	40.634	168.298	104.466	90.2722
457.13	36.1222	239.854	137.988	144.06
458.463	32.739	329.85	181.294	210.089
459.796	29.9946	429.309	229.652	282.358
461.128	27.7116	524.706	276.209	351.428
462.461	26.5859	614.439	320.512	415.675
463.794	26.3635	698.219	362.291	475.074
465.127	27.5151	773.563	400.539	527.535
466.459	30.8492	840.358	435.604	572.409
467.792	37.9412	897.722	467.831	607.957
469.125	49.9725	944.211	497.092	632.322
470.458	68.6922	980.103	524.398	644.465
471.79	96.0299	1005.93	550.981	643.397
473.123	133.574	1021.8	577.685	628.068
474.456	180.628	1028.2	604.416	599.326
475.789	236.917	1026.08	631.498	558.023
477.121	291.596	1016.02	653.806	512.243
478.454	334.631	998.784	666.708	469.628
479.787	367.063	975.745	671.404	430.403
481.12	388.238	949.38	668.809	396.788
482.452	400.891	920.748	660.819	367.595
483.785	404.937	892.153	648.545	344.514
485.118	403.217	864.975	634.096	326.512
486.45	397.133	840.671	618.902	313.628
487.783	388.502	820.048	604.275	305.149
489.116	377.959	805.408	591.684	302.252
490.449	366.36	796.666	581.513	304.272
491.781	352.636	793.178	572.907	311.511
493.114	336.605	792.597	564.601	322.435
494.447	317.2	795.32	556.26	338.082
495.78	293.998	799.198	546.598	357.23
497.112	265.363	803.89	534.626	380.796
498.445	230.725	807.42	519.073	407.784
499.778	190.352	809.027	499.69	437.469
501.111	149.705	807.666	478.685	465.249
502.443	115.884	801.707	458.796	484.95
503.776	98.0673	787.796	442.932	487.712
505.109	84.0508	764.477	424.264	481.134
506.442	71.7957	730.701	401.248	465.916
507.774	61.5923	684.571	373.081	440.512
509.107	53.1017	625.93	339.516	405.051
510.44	46.2859	555.918	301.102	360.364
511.773	40.8427	477.798	259.32	308.974
513.105	36.5181	396.091	216.305	254.256
514.438	33.4373	317.449	175.443	200.827
515.771	32.0725	250.404	141.238	154.384
517.104	32.4646	204.893	118.679	121.925
518.436	35.9791	183.724	109.852	104.472
519.769	43.6915	174.447	109.069	92.4584
521.102	58.4321	178.34	118.386	84.7875
522.434	82.7205	197.438	140.079	81.1178
523.767	119.848	234.263	177.055	80.9036
525.1	172.058	288.528	230.293	82.3567
526.433	242.237	359.416	300.826	82.8581
527.765	330.36	432.527	381.444	72.2431
529.098	430.648	497.937	464.293	47.5804
530.431	526.186	556.581	541.383	21.4926
531.764	615.337	607.109	611.223	5.81807
533.096	695.383	648.982	672.182	32.8105
534.429	763.511	682.254	722.882	57.4572
535.762	817.726	706.611	762.168	78.5703
537.095	856.701	721.956	789.329	95.279
538.427	877.826	727.768	802.797	106.107
539.76	880.024	723.09	801.557	110.969
541.093	863.056	708.011	785.533	109.633
542.426	826.679	679.474	753.076	104.09
543.758	771.745	638.249	704.997	94.3958
545.091	699.986	583.004	641.495	82.719
546.424	615.532	515.769	565.651	70.5434
547.757	522.89	439.067	480.979	59.272
549.089	428.931	358.881	393.906	49.5325
550.422	340.621	282.489	311.555	41.1054
551.755	265.969	219.813	242.891	32.6369
553.088	213.387	181.244	197.315	22.7282
554.42	180.468	160	170.234	14.4734
555.753	150.893	147.451	149.172	2.43377
557.086	126.403	145.497	135.95	13.5018
558.418	106.105	157.752	131.929	36.5201
559.751	89.4006	185.65	137.525	68.0584
561.084	76.2631	230.95	153.607	109.38
562.417	65.588	294.395	179.991	161.791
563.749	57.0169	374.761	215.889	224.679
565.082	51.1922	456.068	253.63	286.29
566.415	46.4437	526.286	286.365	339.299
567.748	46.1497	584.023	315.086	380.334
569.08	49.7241	629.906	339.815	410.251
570.413	59.1316	662.879	361.005	426.914
571.746	76.4989	684.392	380.445	429.845
573.079	103.95	695.221	399.586	418.092
574.411	142.793	697.765	420.279	392.424
575.744	194.888	693.566	444.227	352.619
577.077	259.037	685.389	472.213	301.476
578.41	329.587	674.783	502.185	244.09
579.742	390.638	664.728	527.683	193.81
581.075	438.213	655.897	547.055	153.926
582.408	470.352	648.87	559.611	126.231
583.741	485.887	643.563	564.725	111.494
585.073	483.849	638.682	561.266	109.483
586.406	464.5	631.516	548.008	118.098
587.739	429.48	619.629	524.555	134.456
589.072	381.752	600.104	490.928	154.398
590.404	325.117	570.161	447.639	173.272
591.737	265.579	528.322	396.951	185.787
593.07	209.997	475.013	342.505	187.395
594.402	164.768	412.843	288.805	175.415
595.735	137.752	346.89	242.321	147.883
597.068	122.313	285.416	203.864	115.331
598.401	113.361	238.633	175.997	88.5805
599.733	111.936	217.578	164.757	74.6998
601.066	121.669	224.801	173.235	72.9252
602.399	143.801	247.843	195.822	73.569
603.732	180.567	288.062	234.314	76.0104
605.064	233.956	345.003	289.479	78.5222
606.397	304.12	409.684	356.902	74.6445
607.73	385.76	468.768	427.264	58.6954
609.063	464.431	520.756	492.594	39.8277
610.395	535.95	562.804	549.377	18.9888
611.728	600.435	594.107	597.271	4.47439
613.061	656.623	615.658	636.141	28.9665
614.394	706.315	628.193	667.254	55.2405
615.726	748.509	632.881	690.695	81.7613
617.059	784.657	630.522	707.589	108.99
618.392	814.747	624.484	719.616	134.536
619.725	839.529	616.341	727.935	157.818
621.057	859.186	608.393	733.79	177.337
622.39	874.11	602.769	738.44	191.867
623.723	885.089	601.095	743.092	200.814
625.056	892.098	603.544	747.821	204.039
626.388	894.725	610.831	752.778	200.743
627.721	892.53	622.281	757.406	191.095
629.054	885.337	636.783	761.06	175.754
630.386	872.279	652.988	762.634	155.062
631.719	853.531	669.667	761.599	130.011
633.052	828.83	686.975	757.902	100.307
634.385	798.884	703.157	751.021	67.6892
635.717	764.555	718.847	741.701	32.3207
637.05	728.229	733.767	730.998	3.91561
638.383	691.591	747.923	719.757	39.8329
639.716	659.356	760.944	710.15	71.8336
641.048	633.969	773.027	703.498	98.3288
642.381	619.064	783.386	701.225	116.193
643.714	614.284	791.68	702.982	125.438
645.047	618.035	797.13	707.583	126.639
646.379	622.406	797.234	709.82	123.622
647.712	621.212	791.944	706.578	120.726
649.045	609.165	780.907	695.036	121.44
650.378	583.081	762.692	672.887	127.004
651.71	541.231	736.871	639.051	138.339
653.043	485.829	702.441	594.135	153.167
654.376	418.574	659.774	539.174	170.554
655.709	345.853	609.779	477.816	186.624
657.041	274.839	553.629	414.234	197.134
658.374	214.901	495.6	355.251	198.484
659.707	176.617	439.759	308.188	186.069
661.04	158.607	391.99	275.298	165.026
662.372	148.083	358.105	253.094	148.508
663.705	148.28	342.068	245.174	137.029
665.038	160.664	346.042	253.353	131.082
666.371	186.001	368.44	277.22	129.004
667.703	226.487	404.837	315.662	126.112
669.036	281.09	446.757	363.924	117.145
670.369	343.547	488.211	415.879	102.293
671.701	401.842	525.626	463.734	87.5281
673.034	454.269	556.854	505.562	72.5385
674.367	500.617	580.624	540.62	56.5736
675.7	541.939	596.246	569.092	38.4009
677.032	578.9	604.509	591.705	18.1083
678.365	611.398	605.382	608.39	4.25419
679.698	638.707	599.657	619.182	27.613
681.031	661.587	589.649	625.618	50.8679
682.363	679.393	577.541	628.467	72.0201
683.696	692.652	566.232	629.442	89.3924
685.029	701.177	558.618	629.898	100.805
686.362	706.246	557.142	631.694	105.432
687.694	709.158	563.815	636.487	102.773
689.027	713.237	578.134	645.685	95.5322
690.36	711.391	597.486	654.438	80.5435
691.693	703.131	618.185	660.658	60.0657
693.025	690.473	637.227	663.85	37.6509
694.358	673.775	652.628	663.201	14.953
695.691	653.936	664.99	659.463	7.81652
697.024	632.549	673.928	653.238	29.2594
698.356	610.828	679.349	645.088	48.4519
699.689	590.231	681.773	636.002	64.7301
701.022	571.69	682.855	627.273	78.6056
702.355	555.186	682.81	618.998	90.244
703.687	540.632	683.421	612.027	100.967
705.02	526.69	685.195	605.942	112.08
706.353	512.369	688.69	600.53	124.678
707.685	496.103	693.916	595.009	139.875
709.018	476.574	700.497	588.536	158.338
710.351	452.857	707.158	580.007	179.818
711.684	424.693	714.806	569.75	205.14
713.016	390.643	719.388	555.015	232.458
714.349	351.762	722.186	536.974	261.929
715.682	308.82	723.553	516.187	293.261
717.015	262.85	725.104	493.977	326.863
718.347	216.675	728.027	472.351	361.58
719.68	173.654	735.638	454.646	397.382
721.013	137.144	750.218	443.681	433.509
722.346	112.274	774.665	443.469	468.381
723.678	96.185	809.383	452.784	504.307
725.011	82.7761	853.559	468.168	545.026
726.344	72.7509	903.993	488.372	587.777
727.677	67.2556	956.706	511.981	628.937
729.009	65.9671	1009.13	537.55	666.919
730.342	71.6676	1059.21	565.44	698.3
731.675	84.9888	1104.65	594.821	721.012
733.008	107.548	1141.91	624.73	731.406
734.34	141.589	1170.5	656.043	727.548
735.673	188.226	1188.03	688.126	706.965
737.006	246.664	1194.18	720.42	669.992
738.339	307.254	1187.74	747.499	622.6
739.671	369.66	1170.14	769.901	566.027
741.004	429.13	1140.68	784.904	503.14
742.337	479.656	1101.76	790.706	439.892
743.669	520.093	1056.04	788.069	378.975
745.002	551.022	1007.04	779.029	322.45
746.335	573.864	957.802	765.833	271.485
747.668	589.579	913.167	751.373	228.811
749	599.664	874.785	737.225	194.54
750.333	605.498	846.167	725.833	170.178
751.666	608.282	827.292	717.787	154.864
752.999	608.601	818.192	713.397	148.203
754.331	606.685	816.618	711.651	148.445
755.664	601.742	821.155	711.449	155.148
756.997	593.542	829.098	711.32	166.563
758.33	582.095	837.453	709.774	180.566
759.662	567.581	845.047	706.314	196.198
760.995	551.012	850.373	700.693	211.68
762.328	535.197	852.732	693.964	224.531
763.661	523.156	850.369	686.762	231.375
764.993	517.83	843.607	680.719	230.359
766.326	521.455	833.362	677.408	220.552
767.659	533.266	821.014	677.14	203.469
768.992	550.578	807.969	679.273	182.003
770.324	570.485	795.676	683.08	159.234
771.657	588.86	784.009	686.435	137.991
772.99	601.922	775.564	688.743	122.784
774.323	608.159	770.102	689.131	114.511
775.655	605.465	768.396	686.93	115.209
776.988	592.802	769.723	681.262	125.102
778.321	568.426	775.337	671.882	146.308
779.653	532.916	783.961	658.439	177.516
780.986	486.262	795.846	641.054	218.909
782.319	430.387	810.552	620.47	268.817
783.652	369.555	827.66	598.607	323.929
784.984	309.915	845.638	577.776	378.813
786.317	258.886	863.747	561.317	427.702
787.65	223.363	880.761	552.062	464.85
788.983	208.728	896.148	552.438	486.079
790.315	218.446	909.029	563.737	488.316
791.648	243.426	919.352	581.389	477.952
792.981	285.511	927.446	606.479	453.917
794.314	343.518	933.265	638.391	417.014
795.646	406.646	936.865	671.755	374.922
796.979	462.763	938.036	700.4	336.068
798.312	511.342	937.046	724.194	301.018
799.645	550.715	934.761	742.738	271.562
800.977	580.533	931.459	755.996	248.143
802.31	601.717	926.85	764.284	229.904
803.643	615.877	921.787	768.832	216.312
804.976	625.338	915.232	770.285	204.986
806.308	631.811	906.357	769.084	194.133
807.641	637.871	894.411	766.141	181.401
808.974	644.811	879.234	762.023	165.762
810.307	653.085	860.399	756.742	146.593
811.639	661.849	840.349	751.099	126.218
812.972	669.732	819.347	744.54	105.793
814.305	675.212	799.418	737.315	87.8269
815.637	676.806	782.093	729.449	74.4491
816.97	672.177	770.278	721.228	69.3679
818.303	660.685	764.684	712.684	73.5384
819.636	640.497	766.427	703.462	89.046
820.968	611.205	775.217	693.211	115.974
822.301	573.414	791.036	682.225	153.882
823.634	528.517	811.027	669.772	199.765
824.967	479.125	833.729	656.427	250.742
826.299	430.391	854.239	642.315	299.706
827.632	388.086	870.581	629.334	341.175
828.965	357.281	881.137	619.209	370.422
830.298	342.014	886.312	614.163	384.877
831.63	344.087	886.01	615.048	383.197
832.963	360.294	882.241	621.267	369.073
834.296	387.409	877.686	632.547	346.678
835.629	422.497	875.17	648.834	320.088
836.961	460.837	876.912	668.874	294.209
838.294	497.792	885.336	691.564	274.035
839.627	528.574	902.131	715.352	264.144
840.96	547.832	926.4	737.116	267.688
842.292	551.728	956.699	754.213	286.357
843.625	538.4	989.121	763.761	318.708
844.958	507.126	1021.17	764.147	363.483
846.291	459.182	1049.75	754.467	417.596
847.623	397.707	1074.94	736.324	478.877
848.956	329.457	1093.93	711.694	540.565
850.289	262.723	1105.17	683.947	595.699
851.622	208.132	1108.15	658.143	636.411
852.954	175.977	1105.78	640.877	657.468
854.287	166.135	1098.41	632.273	659.219
855.62	166.449	1088.7	627.574	652.13
856.952	181.129	1077.69	629.411	633.967
858.285	211.668	1069.59	640.63	606.644
859.618	259.4	1066.34	662.871	570.595
860.951	324.929	1071.56	698.245	527.948
862.283	401.34	1085.26	743.3	483.604
863.616	475.661	1107.44	791.551	446.735
864.949	544.19	1136.26	840.224	418.656
866.282	605.275	1170.89	888.083	399.95
867.614	657.641	1208.57	933.107	389.568
868.947	700.43	1249.04	974.734	387.923
870.28	734.21	1289.57	1011.89	392.695
871.613	759.506	1329.11	1044.31	402.771
872.945	778.13	1364.76	1071.45	414.811
874.278	791.588	1393.82	1092.7	425.839
875.611	800.672	1414.51	1107.59	434.048
876.944	807.089	1425.75	1116.42	437.46
878.276	812.376	1426.59	1119.48	434.314
879.609	817.512	1416.38	1116.94	423.46
880.942	822.935	1398.55	1110.74	407.022
882.275	828.984	1375.03	1102.01	386.113
883.607	836.132	1348.48	1092.3	362.283
884.94	844.328	1320.76	1082.54	336.887
886.273	853.213	1293.78	1073.5	311.526
887.606	863.229	1267.38	1065.31	285.781
888.938	873.452	1242.11	1057.78	260.682
890.271	883.28	1218.56	1050.92	237.079
891.604	891.913	1198.96	1045.44	217.113
892.936	897.329	1185.26	1041.29	203.598
894.269	897.907	1180.2	1039.06	199.614
895.602	892.616	1185.05	1038.83	206.78
896.935	879.685	1200.14	1039.91	226.597
898.267	857.416	1223.26	1040.34	258.689
899.6	824.076	1251.07	1037.57	301.929
900.933	779.399	1280.4	1029.9	354.262
902.266	722.911	1309.95	1016.43	415.101
903.598	654.911	1338.73	996.822	483.535
904.931	578.662	1368.46	973.56	558.47
906.264	498.229	1400.18	949.204	637.776
907.597	420.157	1434.94	927.548	717.559
908.929	353.506	1473.03	913.267	791.622
910.262	306.933	1513.9	910.415	853.453
911.595	289.441	1555.27	922.353	895.073
912.928	302.86	1594.38	948.622	913.245
914.26	336.77	1627.84	982.304	912.922
915.593	389.183	1655.06	1022.12	895.109
916.926	455.05	1676.06	1065.56	863.385
918.259	515.686	1691.21	1103.45	831.219
919.591	565.514	1701.27	1133.39	803.103
920.924	606.539	1706.58	1156.56	777.845
922.257	636.801	1706.59	1171.69	756.453
923.59	658.565	1698.7	1178.63	735.488
924.922	672.831	1683.45	1178.14	714.619
926.255	681.463	1659.44	1170.45	691.532
927.588	685.953	1626.53	1156.24	665.086
928.92	689.631	1584.65	1137.14	632.877
930.253	695.805	1535.41	1115.61	593.689
931.586	706.384	1480.23	1093.31	547.195
932.919	722.502	1423.64	1073.07	495.781
934.251	743.122	1369.63	1056.37	443.006
935.584	767.608	1322.82	1045.21	392.594
936.917	793.213	1287.02	1040.12	349.176
938.25	817.129	1264.53	1040.83	316.361
939.582	837.091	1253.62	1045.36	294.533
940.915	851.146	1251.67	1051.41	283.21
942.248	857.797	1252.8	1055.3	279.309
943.581	857.387	1252.38	1054.88	279.299
944.913	850.177	1248.04	1049.11	281.331
946.246	837.293	1237.98	1037.64	283.331
947.579	821.134	1221.82	1021.48	283.326
948.912	804.011	1200.92	1002.47	280.657
950.244	788.172	1178.63	983.4	276.094
951.577	775.029	1158.13	966.581	270.895
952.91	768.815	1141.6	955.208	263.599
954.243	762.548	1129.28	945.914	259.319
955.575	758.431	1120.25	939.339	255.842
956.908	754.358	1112.22	933.289	253.047
958.241	749.483	1103.69	926.586	250.463
959.574	743.8	1092.78	918.288	246.763
960.906	736.851	1079.83	908.343	242.526
962.239	729.523	1065.01	897.265	237.222
963.572	721.055	1050.86	885.957	233.206
964.904	712.898	1037.93	875.412	229.83
966.237	704.6	1028.16	866.383	228.794
967.57	696.125	1020.6	858.365	229.442
968.903	687.145	1014.55	850.849	231.511
970.235	678.959	1007.59	843.276	232.379
971.568	671.488	1001.78	836.636	233.555
972.901	665.821	999.194	832.507	235.73
974.234	662.167	1001.37	831.766	239.849
975.566	660.986	1009.75	835.37	246.616
976.899	661.406	1025.54	843.474	257.483
978.232	663.798	1046.7	855.25	270.754
979.565	666.153	1073.29	869.722	287.89
980.897	667.477	1102.66	885.069	307.721
982.23	666.198	1133.58	899.888	330.488
983.563	662.809	1165.48	914.143	355.44
984.896	657.139	1198.29	927.714	382.651
986.228	649.648	1230.82	940.234	410.95
987.561	641.413	1261.99	951.7	438.812
988.894	633.041	1287.91	960.475	463.061
990.227	625.95	1305.64	965.793	480.611
991.559	621.98	1311.26	966.621	487.395
992.892	622.89	1303.34	963.116	481.152
994.225	631.884	1282.66	957.272	460.168
995.558	650.156	1251.02	950.587	424.874
996.89	677.235	1213.86	945.549	379.453
998.223	710.87	1175.16	943.014	328.302
999.556	746.598	1139.75	943.174	277.999
1000.89	780.933	1112.31	946.622	234.321
1002.22	809.967	1096.11	953.037	202.332
1003.55	832.888	1087.96	960.422	180.36
1004.89	848.333	1087.08	967.708	168.822
1006.22	857.085	1092.09	974.585	166.17
1007.55	859.609	1101.26	980.437	170.876
1008.88	858.68	1110.7	984.688	178.202
1010.22	856.054	1117.81	986.931	185.088
1011.55	853.838	1118.13	985.986	186.885
1012.88	853.758	1110.62	982.191	181.631
1014.22	857.138	1093.51	975.324	167.141
1015.55	862.788	1070.26	966.524	146.705
1016.88	870.278	1042.85	956.565	122.029
1018.21	877.265	1016.22	946.744	98.2589
1019.55	882.14	995.366	938.753	80.0624
1020.88	883.302	984.216	933.759	71.3572
1022.21	881.773	982.284	932.029	71.0722
1023.55	878.6	986.33	932.465	76.1765
1024.88	876.044	995.797	935.921	84.6783
1026.21	875.442	1010.24	942.843	95.3188
1027.54	876.973	1029.98	953.475	108.189
1028.88	881.135	1054.66	967.895	122.698
1030.21	886.159	1080.85	983.503	137.665
1031.54	891.892	1106.94	999.418	152.064
1032.87	896.538	1131.62	1014.08	166.227
1034.21	900.144	1153.28	1026.71	178.996
1035.54	902.521	1170.42	1036.47	189.434
1036.87	904.18	1183.08	1043.63	197.212
1038.21	905.86	1190.07	1047.96	200.965
1039.54	908.848	1190.76	1049.8	199.341
1040.87	913.599	1186.26	1049.93	192.798
1042.2	920.674	1176.9	1048.79	181.178
1043.54	929.846	1164.11	1046.98	165.652
1044.87	940.103	1148.95	1044.53	147.678
1046.2	949.006	1133.77	1041.39	130.648
1047.53	954.943	1122.21	1038.57	118.274
1048.87	955.986	1119.94	1037.96	115.929
1050.2	951.105	1132.55	1041.83	128.3
1051.53	941.114	1162.4	1051.76	156.471
1052.87	927.947	1203.22	1065.58	194.649
1054.2	912.433	1251.01	1081.72	239.407
1055.53	896.643	1300.62	1098.63	285.654
1056.86	878.869	1350.26	1114.57	333.327
1058.2	858.242	1398.57	1128.4	382.066
1059.53	829.446	1443	1136.22	433.85
1060.86	791.226	1481.08	1136.15	487.802
1062.19	742.855	1512.43	1127.64	544.173
1063.53	687.911	1535.63	1111.77	599.425
1064.86	632.031	1548.71	1090.37	648.189
1066.19	584.071	1547.26	1065.67	681.077
1067.53	555.075	1531.92	1043.5	690.733
1068.86	556.82	1503.48	1030.15	669.393
1070.19	600.792	1465.23	1033.01	611.251
1071.52	666.61	1423.24	1044.93	535.02
1072.86	724.82	1381.94	1053.38	464.651
1074.19	775.515	1345.85	1060.68	403.291
1075.52	814.318	1319.47	1066.89	357.195
1076.85	841.127	1306.68	1073.9	329.194
1078.19	855.608	1305.04	1080.33	317.8
1079.52	857.997	1310.33	1084.16	319.846
1080.85	849.98	1321.75	1085.86	333.591
1082.19	834.598	1336.59	1085.59	354.959
1083.52	815.386	1353.39	1084.39	380.428
1084.85	794.76	1367.63	1081.2	405.081
1086.18	777.63	1376.11	1076.87	423.189
1087.52	765.194	1377.25	1071.22	432.788
1088.85	761.138	1372.48	1066.81	432.286
1090.18	766.324	1364.44	1065.38	422.933
1091.51	782.178	1356.09	1069.14	405.819
1092.85	803.622	1351.06	1077.34	387.096
1094.18	826.86	1352.34	1089.6	371.572
1095.51	848.094	1359.48	1103.79	361.606
1096.85	866.46	1371.99	1119.23	357.464
1098.18	881.12	1386.19	1133.66	357.14
1099.51	894.744	1398.37	1146.56	356.116
1100.84	907.687	1408.08	1157.88	353.828
1102.18	922.2	1415.83	1169.02	349.05
1103.51	937.852	1421.46	1179.66	341.966
1104.84	951.668	1427.14	1189.4	336.206
1106.18	960.827	1436.24	1198.54	336.17
1107.51	963.457	1450.9	1207.18	344.675
1108.84	959.068	1475.61	1217.34	365.249
1110.17	948.626	1511.98	1230.3	398.348
1111.51	935.372	1559.49	1247.43	441.314
1112.84	921.173	1609.87	1265.52	486.985
1114.17	907.376	1655.82	1281.6	529.231
1115.5	893.63	1692.83	1293.23	565.121
1116.84	879.954	1718.83	1299.39	593.172
1118.17	863.931	1731.8	1297.87	613.677
1119.5	847.116	1732	1289.56	625.707
1120.84	829.103	1719.38	1274.24	629.522
1122.17	813.135	1693.96	1253.55	622.839
1123.5	800.062	1658.79	1229.43	607.214
1124.83	792.604	1616.69	1204.65	582.719
1126.17	791.207	1570.93	1181.07	551.348
1127.5	794.62	1525.42	1160.02	516.755
1128.83	799.018	1482.13	1140.58	483.036
1130.16	805.084	1440.67	1122.88	449.425
1131.5	812.699	1403.25	1107.98	417.585
1132.83	823.707	1370.83	1097.27	386.875
1134.16	839.236	1347.18	1093.21	359.171
1135.5	859.391	1334.62	1097.01	336.037
1136.83	879.418	1335.28	1107.35	322.34
1138.16	894.484	1347.43	1120.96	320.282
1139.49	901.354	1367.64	1134.5	329.713
1140.83	899.371	1391.93	1145.65	348.292
1142.16	888.818	1419.34	1154.08	375.136
1143.49	871.486	1447.76	1159.62	407.486
1144.82	849.652	1479.02	1164.34	445.031
1146.16	825.906	1515.28	1170.59	487.458
1147.49	802.781	1557.81	1180.29	533.883
1148.82	783.557	1606.29	1194.92	581.759
1150.16	770.857	1660.75	1215.8	629.248
1151.49	766.888	1719.94	1243.41	673.91
1152.82	772.049	1783.12	1277.58	714.933
1154.15	784.577	1848.97	1316.77	752.639
1155.49	802.244	1915.94	1359.09	787.5
1156.82	821.656	1981.95	1401.8	820.449
1158.15	837.966	2043.33	1440.65	852.32
1159.48	846.588	2098.47	1472.53	885.214
1160.82	845.762	2144.56	1495.16	918.388
1162.15	834.85	2179.75	1507.3	950.988
1163.48	817.693	2204.66	1511.18	980.736
1164.82	799.024	2219.9	1509.46	1004.71
1166.15	785.782	2225.87	1505.83	1018.3
1167.48	785.495	2223.33	1504.41	1016.71
1168.81	804.515	2213.96	1509.24	996.628
1170.15	841.452	2198.92	1520.18	959.873
1171.48	891.378	2179.63	1535.5	910.931
1172.81	945.259	2157.28	1551.27	857.026
1174.14	996.407	2132.94	1564.67	803.648
1175.48	1043.84	2108.08	1575.96	752.531
1176.81	1090.58	2081.46	1586.02	700.654
1178.14	1141.13	2052.69	1596.91	644.568
1179.48	1200.15	2021.48	1610.82	580.771
1180.81	1271.2	1987.86	1629.53	506.756
1182.14	1353.54	1950.38	1651.96	422.031
1183.47	1437.88	1911.11	1674.49	334.623
1184.81	1519.22	1870.35	1694.78	248.285
1186.14	1593.58	1829.1	1711.34	166.536
1187.47	1657.52	1788.84	1723.18	92.8559
1188.8	1707.87	1751.1	1729.48	30.5624
1190.14	1742.21	1718.06	1730.13	17.077
1191.47	1760.68	1693.76	1727.22	47.3193
1192.8	1764.13	1680.7	1722.41	58.9897
1194.14	1754.11	1681.96	1718.03	51.0189
1195.47	1733.84	1697.51	1715.67	25.6864
1196.8	1705.28	1726.54	1715.91	15.0299
1198.13	1669.69	1763.36	1716.53	66.2305
1199.47	1630.41	1805.66	1718.03	123.917
1200.8	1586.87	1848.51	1717.69	185.005
1202.13	1540.8	1889.86	1715.33	246.822
1203.47	1493.65	1928.82	1711.23	307.71
1204.8	1448.31	1961.5	1704.9	362.88
1206.13	1406.87	1986.89	1696.88	410.136
1207.46	1371.33	2002.92	1687.13	446.605
1208.8	1340.01	2010.65	1675.33	474.212
1210.13	1312.68	2008.7	1660.69	492.158
1211.46	1290.56	1998.9	1644.73	500.868
1212.79	1273.51	1979.86	1626.69	499.465
1214.13	1259.5	1952.44	1605.97	489.985
1215.46	1249.47	1915.97	1582.72	471.283
1216.79	1243.72	1875.93	1559.83	447.044
1218.13	1243.59	1835.05	1539.32	418.229
1219.46	1248.98	1799.23	1524.11	389.083
1220.79	1260.53	1770.77	1515.65	360.798
1222.12	1275.4	1754.54	1514.97	338.802
1223.46	1289.43	1749.2	1519.32	325.107
1224.79	1300.48	1755.75	1528.11	321.92
1226.12	1307.66	1770.98	1539.32	327.618
1227.45	1310.48	1793.24	1551.86	341.366
1228.79	1307.58	1818.46	1563.02	361.247
1230.12	1300.54	1844.1	1572.32	384.357
1231.45	1292.36	1867.5	1579.93	406.688
1232.79	1285.76	1886.07	1585.91	424.48
1234.12	1281.85	1897.11	1589.48	435.056
1235.45	1279.62	1899.64	1589.63	438.419
1236.78	1276.88	1892.91	1584.89	435.601
1238.12	1274.04	1877.06	1575.55	426.396
1239.45	1269.7	1853.55	1561.62	412.847
1240.78	1264.37	1824.16	1544.26	395.832
1242.11	1259.79	1792.24	1526.01	376.5
1243.45	1262.95	1759.34	1511.14	351.001
1244.78	1278.73	1729.65	1504.19	318.846
1246.11	1311.06	1704.52	1507.79	278.216
1247.45	1359.16	1684.82	1521.99	230.272
1248.78	1419.55	1669.06	1544.31	176.433
1250.11	1483.82	1656.54	1570.18	122.129
1251.44	1547.65	1644.5	1596.07	68.4835
1252.78	1607.26	1633.46	1620.36	18.5247
1254.11	1656.66	1623.06	1639.86	23.7597
1255.44	1691.63	1614.85	1653.24	54.2934
1256.77	1711.02	1611.87	1661.44	70.1142
1258.11	1714.54	1616.85	1665.7	69.0782
1259.44	1701.94	1633.6	1667.77	48.3246
1260.77	1675.66	1663.46	1669.56	8.62529
1262.11	1638.81	1705.58	1672.19	47.2125
1263.44	1595.58	1753.96	1674.77	111.996
1264.77	1549.27	1803.18	1676.23	179.545
1266.1	1503.04	1849.22	1676.13	244.789
1267.44	1458.83	1888.37	1673.6	303.73
1268.77	1422.2	1919.98	1671.09	351.986
1270.1	1394	1943.83	1668.92	388.791
1271.43	1373.69	1962.08	1667.89	416.051
1272.77	1360.35	1977.98	1669.17	436.726
1274.1	1347.43	1993.27	1670.35	456.672
1275.43	1331.1	2010.88	1670.99	480.683
1276.77	1310.68	2030.59	1670.63	509.048
1278.1	1287.6	2054.15	1670.87	542.033
1279.43	1266.68	2077.97	1672.32	573.674
1280.76	1254.83	2096.52	1675.67	595.165
1282.1	1258.01	2107.93	1682.97	600.985
1283.43	1280.55	2107.07	1693.81	584.439
1284.76	1323.4	2093.04	1708.22	544.221
1286.1	1379.39	2063.84	1721.62	483.979
1287.43	1434.94	2021.43	1728.18	414.711
1288.76	1486.01	1966.08	1726.05	339.46
1290.09	1526.58	1905.21	1715.9	267.733
1291.43	1553.65	1842.01	1697.83	203.903
1292.76	1565.3	1785.33	1675.31	155.581
1294.09	1560.74	1739.05	1649.89	126.088
1295.42	1540.48	1709.51	1624.99	119.523
1296.76	1507.04	1692.79	1599.92	131.342
1298.09	1460.73	1684.27	1572.5	158.063
1299.42	1403.66	1674.6	1539.13	191.584
1300.76	1339.48	1663.01	1501.25	228.775
1302.09	1273.59	1644.49	1459.04	262.265
1303.42	1212.16	1621.73	1416.94	289.611
1304.75	1161.86	1594.17	1378.01	305.693
1306.09	1126.52	1564.43	1345.47	309.648
1307.42	1106.72	1534.51	1320.61	302.497
1308.75	1105.68	1509.39	1307.53	285.472
1310.08	1123.21	1492.71	1307.96	261.282
1311.42	1155.05	1488.81	1321.93	236.003
1312.75	1190.41	1501.7	1346.06	220.117
1314.08	1217.47	1532.88	1375.17	223.029
1315.42	1231.47	1582.45	1406.96	248.182
1316.75	1230.89	1645.14	1438.02	292.916
1318.08	1216.38	1709.76	1463.07	348.87
1319.41	1191.1	1774.34	1482.72	412.412
1320.75	1159.57	1836.73	1498.15	478.825
1322.08	1126.9	1896.08	1511.49	543.89
1323.41	1100.24	1950.03	1525.14	600.893
1324.74	1085.47	2000.91	1543.19	647.308
1326.08	1084.06	2052.18	1568.12	684.562
1327.41	1091.08	2105.42	1598.25	717.242
1328.74	1099.82	2161.37	1630.6	750.628
1330.08	1108.38	2217.41	1662.9	784.206
1331.41	1116.76	2269.25	1693	814.931
1332.74	1125.64	2311.08	1718.36	838.229
1334.07	1136.44	2339.53	1737.99	850.709
1335.41	1148.32	2352.95	1750.63	851.798
1336.74	1156.71	2346.35	1751.53	841.202
1338.07	1159.32	2318.5	1738.91	819.66
1339.4	1154.85	2270.96	1712.9	789.211
1340.74	1142.65	2206.48	1674.57	752.239
1342.07	1127.53	2128.87	1628.2	708.052
1343.4	1114.38	2044.34	1579.36	657.585
1344.74	1106	1959.46	1532.73	603.493
1346.07	1103.95	1881.4	1492.67	549.738
1347.4	1108.36	1814.51	1461.43	499.322
1348.73	1116.52	1760.98	1438.75	455.701
1350.07	1125.55	1722.36	1423.96	422.013
1351.4	1134.07	1698.86	1416.46	399.366
1352.73	1139.87	1685.6	1412.74	385.891
1354.06	1142.85	1682.98	1412.92	381.932
1355.4	1143.18	1689.69	1416.44	386.442
1356.73	1140.9	1704.3	1422.6	398.386
1358.06	1136.53	1725.85	1431.19	416.717
1359.4	1130.19	1754.54	1442.37	441.486
1360.73	1122.05	1789.44	1455.75	471.911
1362.06	1113.42	1828.11	1470.76	505.363
1363.39	1105.72	1868.64	1487.18	539.46
1364.73	1098.55	1909.08	1503.82	573.135
1366.06	1091.02	1948	1519.51	605.974
1367.39	1080.77	1981.24	1531.01	636.727
1368.73	1068.14	2010.59	1539.36	666.408
1370.06	1054.79	2036.15	1545.47	693.927
1371.39	1040.62	2057.19	1548.91	718.819
1372.72	1027.99	2073.66	1550.83	739.399
1374.06	1018.96	2086.8	1552.88	755.079
1375.39	1014.81	2095.98	1555.39	764.499
1376.72	1016.23	2103.17	1559.7	768.58
1378.05	1022.96	2108.37	1565.67	767.503
1379.39	1033.74	2111.8	1572.77	762.303
1380.72	1048.33	2108.32	1578.32	749.525
1382.05	1065.04	2099.12	1582.08	731.203
1383.39	1080.62	2081.99	1581.31	708.08
1384.72	1091.25	2057.67	1574.46	683.359
1386.05	1093.51	2027.17	1560.34	660.2
1387.38	1084.75	1994.31	1539.53	643.152
1388.72	1068.06	1960.94	1514.5	631.358
1390.05	1044.18	1929.95	1487.07	626.337
1391.38	1017.63	1899.07	1458.35	623.273
1392.71	992.425	1870.02	1431.22	620.55
1394.05	973.51	1843.09	1408.3	614.888
1395.38	961.797	1817.28	1389.54	604.921
1396.71	953.815	1794.76	1374.29	594.636
1398.05	947.273	1776.34	1361.81	586.242
1399.38	941.539	1764.8	1353.17	582.137
1400.71	938.126	1761.56	1349.84	582.257
1402.04	938.841	1767.04	1352.94	585.627
1403.38	946.585	1781.34	1363.96	590.261
1404.71	961.559	1804.07	1382.81	595.746
1406.04	981.818	1829.36	1405.59	599.3
1407.37	1003.97	1856.53	1430.25	602.847
1408.71	1023.72	1884.02	1453.87	608.319
1410.04	1038.87	1909.16	1474.01	615.384
1411.37	1049.82	1929.62	1489.72	622.116
1412.71	1057.41	1944.03	1500.72	626.933
1414.04	1062.47	1950.99	1506.73	628.283
1415.37	1066.57	1949.16	1507.87	624.085
1416.7	1071.25	1939.17	1505.21	613.714
1418.04	1076.64	1922.68	1499.66	598.241
1419.37	1084	1900.4	1492.2	577.281
1420.7	1092.14	1875.6	1483.87	553.991
1422.03	1101.73	1850.45	1476.09	529.425
1423.37	1112.01	1827.33	1469.67	505.81
1424.7	1122.71	1808.88	1465.8	485.193
1426.03	1133.43	1797.42	1465.42	469.508
1427.37	1145.69	1794.37	1470.03	458.687
1428.7	1159.45	1800.55	1480	453.324
1430.03	1174.55	1812.57	1493.56	451.148
1431.36	1188.22	1828.46	1508.34	452.719
1432.7	1199.66	1846.79	1523.23	457.588
1434.03	1209.81	1866.67	1538.24	464.471
1435.36	1221.29	1885.5	1553.39	469.67
1436.69	1236.09	1903.23	1569.66	471.735
1438.03	1255.56	1919.51	1587.54	469.481
1439.36	1280.27	1933.38	1606.83	461.823
1440.69	1309.68	1944.46	1627.07	448.859
1442.03	1342.79	1953.53	1648.16	431.857
1443.36	1378.81	1960.63	1669.72	411.412
1444.69	1414.68	1967	1690.84	390.547
1446.02	1447.45	1974.81	1711.13	372.901
1447.36	1477.9	1985.38	1731.64	358.844
1448.69	1506.16	1998.57	1752.36	348.189
1450.02	1534.47	2013.74	1774.1	338.897
1451.35	1563.88	2031.9	1797.89	330.938
1452.69	1594.82	2051.78	1823.3	323.115
1454.02	1625.21	2071.74	1848.48	315.74
1455.35	1651.08	2088.01	1869.55	308.954
1456.69	1669.7	2100.72	1885.21	304.776
1458.02	1680.35	2107.19	1893.77	301.819
1459.35	1681.36	2108.67	1895.01	302.155
1460.68	1671.24	2106.62	1888.93	307.862
1462.02	1648.93	2103.9	1876.42	321.711
1463.35	1617.01	2102.16	1859.58	343.049
1464.68	1578.16	2104.64	1841.4	372.277
1466.02	1537.69	2108.54	1823.11	403.648
1467.35	1498	2114.12	1806.06	435.661
1468.68	1465.17	2117.56	1791.36	461.306
1470.01	1444.2	2118.37	1781.29	476.709
1471.35	1434.62	2115.71	1775.17	481.603
1472.68	1439.43	2110.8	1775.12	474.731
1474.01	1457.66	2104.65	1781.15	457.492
1475.34	1487.31	2101.44	1794.37	434.256
1476.68	1524.88	2105.88	1815.38	410.832
1478.01	1563.68	2122.21	1842.95	394.945
1479.34	1595.15	2151.8	1873.48	393.609
1480.68	1614.99	2191.95	1903.47	407.971
1482.01	1622.18	2239.76	1930.97	436.697
1483.34	1616.92	2288.83	1952.87	475.114
1484.67	1600.06	2334.05	1967.05	519.006
1486.01	1577.29	2371.63	1974.46	561.683
1487.34	1551.32	2399.51	1975.41	599.766
1488.67	1526.77	2415.2	1970.98	628.216
1490	1505.53	2420.34	1962.93	646.863
1491.34	1489.57	2411.87	1950.72	652.163
1492.67	1479.12	2390.18	1934.65	644.215
1494	1473.5	2355.54	1914.52	623.696
1495.34	1466.17	2306.68	1886.42	594.333
1496.67	1453.12	2243.16	1848.14	558.647
1498	1429.75	2166.81	1798.28	521.183
1499.33	1397.14	2077.16	1737.15	480.847
1500.67	1356.2	1975.12	1665.66	437.643
1502	1312.05	1863.16	1587.6	389.699
1503.33	1270.62	1746.68	1508.65	336.624
1504.66	1241.27	1630.51	1435.89	275.234
1506	1229.74	1519.97	1374.85	205.229
1507.33	1240.59	1421.67	1331.13	128.046
1508.66	1268.63	1337.83	1303.23	48.9354
1510	1302.01	1266.81	1284.41	24.8866
1511.33	1333.79	1193.13	1263.46	99.4648
1512.66	1360.41	1110.04	1235.23	177.038
1513.99	1379.88	1014.68	1197.28	258.233
1515.33	1392.32	913.027	1152.68	338.915
1516.66	1401.53	822.963	1112.25	409.108
1517.99	1409.99	771.927	1090.96	451.182
1519.32	1421.36	782.973	1102.17	451.407
1520.66	1437.41	850.552	1143.98	414.972
1521.99	1457.92	939.951	1198.93	366.257
1523.32	1482.77	1065.36	1274.07	295.154
1524.66	1509.28	1217.19	1363.23	206.535
1525.99	1536.53	1384.69	1460.61	107.372
1527.32	1563.07	1555.8	1559.44	5.14568
1528.65	1587.9	1725.25	1656.58	97.1229
1529.99	1611.57	1890.08	1750.82	196.934
1531.32	1632.06	2047.96	1840.01	294.087
1532.65	1648.03	2194.21	1921.12	386.206
1533.98	1656.73	2330.01	1993.37	476.084
1535.32	1658.5	2456.28	2057.39	564.116
1536.65	1653.65	2573.75	2113.7	650.605
1537.98	1643.63	2682.33	2162.98	734.471
1539.32	1629.58	2783.83	2206.71	816.175
1540.65	1614.51	2877.31	2245.91	892.935
1541.98	1601.41	2964.32	2282.86	963.721
1543.31	1593.61	3044.86	2319.23	1026.19
1544.65	1593.96	3120.29	2357.13	1079.28
1545.98	1603.57	3188.95	2396.26	1121.04
1547.31	1620.76	3251.14	2435.95	1152.85
1548.65	1640.82	3306.03	2473.43	1177.48
1549.98	1659.06	3355.9	2507.48	1199.85
1551.31	1670.39	3401.89	2536.14	1224.36
1552.64	1671.4	3444.67	2558.04	1253.9
1553.98	1660.98	3485.21	2573.1	1289.93
1555.31	1642.44	3524.1	2583.27	1330.53
1556.64	1619.72	3561.73	2590.72	1373.21
1557.97	1599.49	3597.43	2598.46	1412.76
1559.31	1587.4	3631.73	2609.57	1445.56
1560.64	1588.16	3664.07	2626.11	1467.89
1561.97	1602.22	3693.5	2647.86	1478.76
1563.31	1625.78	3719.49	2672.64	1480.48
1564.64	1653.07	3741.07	2697.07	1476.44
1565.97	1681.71	3756.25	2718.98	1466.92
1567.3	1710.03	3765.77	2737.9	1453.63
1568.64	1734.82	3769.21	2752.01	1438.52
1569.97	1751.24	3766.45	2758.85	1424.97
1571.3	1757.35	3756.35	2756.85	1413.51
1572.63	1747.87	3740.44	2744.15	1408.96
1573.97	1721.88	3718.57	2720.23	1411.88
1575.3	1679.72	3693.31	2686.51	1423.82
1576.63	1625.5	3666.53	2646.02	1443.22
1577.97	1562.14	3640.9	2601.52	1469.9
1579.3	1495	3619.07	2557.03	1501.94
1580.63	1429.12	3604.21	2516.67	1538.03
1581.96	1372.6	3596.72	2484.66	1572.69
1583.3	1331.42	3598.24	2464.83	1602.88
1584.63	1307.69	3605.96	2456.83	1625.13
1585.96	1300.81	3619.68	2460.24	1639.68
1587.29	1304.92	3634.42	2469.67	1647.2
1588.63	1316.18	3649.22	2482.7	1649.71
1589.96	1331.24	3658.34	2494.79	1645.5
1591.29	1347.7	3660.28	2503.99	1635.24
1592.63	1365.19	3650.57	2507.88	1616.01
1593.96	1386.57	3629.53	2508.05	1586.01
1595.29	1413.95	3594.61	2504.28	1541.96
1596.62	1448.77	3547.73	2498.25	1484.19
1597.96	1486.07	3491.2	2488.64	1417.84
1599.29	1522.45	3428.35	2475.4	1347.67
1600.62	1552.04	3364.14	2458.09	1281.35
1601.95	1573.91	3305.04	2439.48	1224.1
1603.29	1585.96	3257.45	2421.71	1181.93
1604.62	1590.34	3226.56	2408.45	1156.98
1605.95	1588.33	3215.1	2401.71	1150.3
1607.29	1585.41	3223.22	2404.31	1158.11
1608.62	1580.37	3247.85	2414.11	1179.09
1609.95	1575.01	3280.99	2428	1206.31
1611.28	1568.14	3317.16	2442.65	1236.74
1612.62	1558.41	3352.6	2455.51	1268.68
1613.95	1541.21	3385.25	2463.23	1303.93
1615.28	1515.46	3413.57	2464.52	1342.16
1616.61	1480.82	3438.39	2459.6	1384.21
1617.95	1440.23	3460.34	2450.28	1428.44
1619.28	1396.72	3482.41	2439.56	1474.81
1620.61	1354.55	3505.08	2429.82	1520.66
1621.95	1317.26	3529.28	2423.27	1564.13
1623.28	1288.62	3555.39	2422	1602.85
1624.61	1273.27	3582.88	2428.08	1633.14
1625.94	1277.26	3608.59	2442.93	1648.5
1627.28	1302.81	3631.22	2467.02	1646.44
1628.61	1349.11	3649.64	2499.38	1626.72
1629.94	1403.19	3663.95	2533.57	1598.6
1631.27	1454.03	3676.02	2565.03	1571.19
1632.61	1497.32	3687.16	2592.24	1548.45
1633.94	1530.5	3698.85	2614.67	1533.25
1635.27	1550.98	3711.31	2631.15	1527.58
1636.61	1557.42	3727.19	2642.3	1534.26
1637.94	1552.51	3745.94	2649.23	1550.99
1639.27	1536.07	3768.85	2652.46	1578.82
1640.6	1511.3	3795.93	2653.61	1615.47
1641.94	1481.69	3827.81	2654.75	1658.96
1643.27	1447.18	3863.67	2655.43	1708.72
1644.6	1409.09	3904.96	2657.02	1764.85
1645.94	1368.79	3950.27	2659.53	1825.38
1647.27	1329.15	4000.82	2664.99	1889.16
1648.6	1293.38	4055.09	2674.23	1952.83
1649.93	1263.02	4113.41	2688.21	2015.53
1651.27	1241.92	4174.87	2708.39	2073.91
1652.6	1233.64	4239.94	2736.79	2125.77
1653.93	1237.62	4306.93	2772.28	2170.32
1655.26	1251.59	4375.73	2813.66	2209.1
1656.6	1275.75	4445.36	2860.56	2241.25
1657.93	1309.46	4515.22	2912.34	2266.81
1659.26	1350.83	4583.71	2967.27	2285.99
1660.6	1393.82	4650.71	3022.26	2302.97
1661.93	1434.21	4715.7	3074.95	2320.37
1663.26	1470.7	4778.81	3124.76	2339.18
1664.59	1502.47	4838.52	3170.49	2358.94
1665.93	1530.43	4894.14	3212.29	2378.5
1667.26	1557.26	4946.78	3252.02	2396.76
1668.59	1585.42	4995.79	3290.61	2411.49
1669.92	1615.89	5040.41	3328.15	2421.5
1671.26	1649.77	5079.94	3364.85	2425.5
1672.59	1686.77	5113.39	3400.08	2422.99
1673.92	1724.81	5140.29	3432.55	2415.11
1675.26	1761.02	5161.13	3461.07	2404.24
1676.59	1792.78	5176.45	3484.61	2392.62
1677.92	1816.36	5185.31	3500.84	2382.2
1679.25	1829.97	5187.77	3508.87	2374.32
1680.59	1830.28	5183.81	3507.04	2371.3
1681.92	1815.66	5173.32	3494.49	2374.22
1683.25	1786.76	5155.91	3471.34	2382.35
1684.58	1746.48	5132.1	3439.29	2393.99
1685.92	1697.2	5102.57	3399.88	2407.96
1687.25	1643.34	5068.46	3355.9	2421.93
1688.58	1590.33	5030.1	3310.22	2432.29
1689.92	1545.05	4988.2	3266.62	2434.67
1691.25	1509.55	4943.64	3226.59	2428.27
1692.58	1486.27	4897.73	3192	2412.27
1693.91	1476.2	4851.33	3163.77	2386.58
1695.25	1480.22	4805.06	3142.64	2351.02
1696.58	1494.22	4759.79	3127	2309.11
1697.91	1520.36	4717.18	3118.77	2260.49
1699.24	1559.14	4678.61	3118.88	2205.8
1700.58	1610.5	4644.62	3127.56	2145.45
1701.91	1675.03	4616.05	3145.54	2079.61
1703.24	1750.75	4593.28	3172.01	2009.97
1704.58	1833.34	4575.78	3204.56	1939.2
1705.91	1916	4563.63	3239.81	1872.16
1707.24	1989.6	4557.71	3273.65	1815.93
1708.57	2046.38	4557.07	3301.73	1775.32
1709.91	2082.31	4562.01	3322.16	1753.41
1711.24	2093.47	4569.67	3331.57	1750.94
1712.57	2078.62	4579.37	3328.99	1768.3
1713.9	2039.35	4590.23	3314.79	1803.75
1715.24	1979.69	4602.69	3291.19	1854.75
1716.57	1904.36	4615.73	3260.04	1917.22
1717.9	1820.71	4629.85	3225.28	1986.36
1719.24	1738.46	4644.51	3191.48	2054.89
1720.57	1668.87	4655.11	3161.99	2111.59
1721.9	1625.79	4660.81	3143.3	2146.08
1723.23	1619.98	4660.45	3140.22	2149.94
1724.57	1659.45	4655.76	3157.61	2118.71
1725.9	1723.98	4646.74	3185.36	2066.7
1727.23	1786.59	4636.28	3211.43	2015.04
1728.57	1840.94	4623.61	3232.27	1967.64
1729.9	1881.93	4610.43	3246.18	1929.34
1731.23	1906.03	4597.33	3251.68	1903.03
1732.56	1908.38	4586.37	3247.38	1893.62
1733.9	1889.91	4577.54	3233.73	1900.44
1735.23	1851.63	4573.21	3212.42	1924.44
1736.56	1795.36	4571.63	3183.5	1963.12
1737.89	1726.87	4573.11	3149.99	2012.6
1739.23	1651.96	4574.87	3113.41	2066.81
1740.56	1580.69	4578.25	3079.47	2119.6
1741.89	1520.81	4581.97	3051.39	2164.56
1743.23	1481.81	4585.53	3033.67	2194.66
1744.56	1472.07	4587.17	3029.62	2202.7
1745.89	1492.53	4585.54	3039.04	2187.09
1747.22	1533.91	4580.54	3057.23	2154.3
1748.56	1583.52	4575.67	3079.6	2115.77
1749.89	1633.85	4573.22	3103.53	2078.45
1751.22	1682.44	4570.7	3126.57	2042.3
1752.55	1723.32	4566.36	3144.84	2010.34
1753.89	1753.3	4562.11	3157.71	1986.12
1755.22	1769.41	4559.71	3164.56	1973.04
1756.55	1771.92	4561.29	3166.6	1972.39
1757.89	1761.15	4559.99	3160.57	1979.08
1759.22	1741.64	4555.62	3148.63	1989.79
1760.55	1719.06	4547.75	3133.4	2000.19
1761.88	1698.92	4538.49	3118.71	2007.88
1763.22	1686.47	4528.14	3107.31	2009.36
1764.55	1685.14	4517.65	3101.39	2002.89
1765.88	1694.59	4505.01	3099.8	1987.27
1767.21	1711.64	4490.02	3100.83	1964.61
1768.55	1730.22	4473.49	3101.86	1939.79
1769.88	1749.32	4456.69	3103	1914.4
1771.21	1766.97	4441.37	3104.17	1891.09
1772.55	1783.88	4428.72	3106.3	1870.19
1773.88	1800.15	4419.67	3109.91	1852.28
1775.21	1816.25	4414.51	3115.38	1837.24
1776.54	1830.74	4412.5	3121.62	1825.58
1777.88	1840.53	4413.68	3127.1	1819.49
1779.21	1843.19	4416.61	3129.9	1819.68
1780.54	1838.48	4419.7	3129.09	1825.2
1781.87	1826.14	4420.77	3123.45	1834.68
1783.21	1809.25	4421.32	3115.29	1847.01
1784.54	1789.33	4418.29	3103.81	1858.96
1785.87	1766.18	4410.04	3088.11	1869.49
1787.21	1739.87	4394.9	3067.39	1877.39
1788.54	1711.78	4375.94	3043.86	1883.84
1789.87	1683.49	4352.89	3018.19	1887.55
1791.2	1657.19	4329.54	2993.37	1889.63
1792.54	1636.39	4305.67	2971.03	1887.47
1793.87	1620.52	4285.12	2952.82	1884.16
1795.2	1605.69	4263.31	2934.5	1879.23
1796.53	1592.05	4246.96	2919.51	1877.3
1797.87	1575.23	4233.23	2904.23	1879.49
1799.2	1552.53	4225.15	2888.84	1889.83
1800.53	1525.53	4219.6	2872.56	1905
1801.87	1497.91	4219.66	2858.79	1924.57
1803.2	1471.45	4223.16	2847.3	1945.75
1804.53	1447.03	4232.68	2839.86	1969.75
1805.86	1427.31	4244.21	2835.76	1991.85
1807.2	1414.63	4257.42	2836.03	2010.16
1808.53	1407.54	4272.66	2840.1	2025.95
1809.86	1405.09	4289.8	2847.44	2039.8
1811.2	1410.1	4307.45	2858.77	2048.74
1812.53	1423.61	4322.97	2873.29	2050.16
1813.86	1445.35	4339.03	2892.19	2046.14
1815.19	1475.01	4353.34	2914.18	2035.28
1816.53	1511.35	4366.29	2938.82	2018.75
1817.86	1551.51	4377.53	2964.52	1998.29
1819.19	1592.96	4388.26	2990.61	1976.58
1820.52	1630.19	4399.76	3014.98	1958.38
1821.86	1659.05	4413.19	3036.12	1947.47
1823.19	1677.51	4427.66	3052.59	1944.65
1824.52	1685.88	4442.15	3064.02	1948.98
1825.86	1684.58	4456.1	3070.34	1959.76
1827.19	1675.83	4468.08	3071.95	1974.42
1828.52	1662.91	4476.84	3069.87	1989.75
1829.85	1650.97	4483.02	3066.99	2002.56
1831.19	1642.82	4484.43	3063.63	2009.32
1832.52	1641.39	4480.47	3060.93	2007.53
1833.85	1648.97	4470.73	3059.85	1995.29
1835.18	1665.81	4455.83	3060.82	1972.84
1836.52	1691.15	4436	3063.58	1940.9
1837.85	1723.15	4410.36	3066.76	1900.14
1839.18	1760.27	4379.49	3069.88	1852.07
1840.52	1793.99	4343.9	3068.94	1803.06
1841.85	1819.75	4303.87	3061.81	1756.54
1843.18	1836.57	4260.3	3048.44	1713.84
1844.51	1844.98	4213.27	3029.13	1674.64
1845.85	1847.99	4163.2	3005.6	1637.1
1847.18	1847.86	4110.79	2979.32	1600.13
1848.51	1847.28	4057.99	2952.64	1563.2
1849.84	1849.22	4004.69	2926.95	1524.15
1851.18	1853.25	3951.98	2902.61	1484.02
1852.51	1859.78	3898.73	2879.26	1441.75
1853.84	1866.72	3846.62	2856.67	1400
1855.18	1871.07	3794.74	2832.91	1360.24
1856.51	1871.23	3743.35	2807.29	1323.79
1857.84	1867.14	3691.04	2779.09	1289.7
1859.17	1858.65	3639.21	2748.93	1259.05
1860.51	1845.84	3587.65	2716.74	1231.65
1861.84	1828.98	3538.1	2683.54	1208.53
1863.17	1807.27	3489.7	2648.48	1189.65
1864.5	1779.88	3443.25	2611.56	1176.18
1865.84	1749.63	3399.17	2574.4	1166.4
1867.17	1720.55	3359.35	2539.95	1158.81
1868.5	1696.17	3322.04	2509.1	1149.66
1869.84	1679.14	3289.39	2484.27	1138.62
1871.17	1671.44	3261.32	2466.38	1124.21
1872.5	1674.44	3237.29	2455.87	1105.11
1873.83	1687.36	3216.28	2451.82	1081.11
1875.17	1711.06	3198.44	2454.75	1051.74
1876.5	1745.01	3183.95	2464.48	1017.48
1877.83	1787.65	3172.17	2479.91	979.004
1879.16	1836.11	3164.19	2500.15	939.093
1880.5	1885.95	3160.26	2523.11	901.071
1881.83	1934.26	3160.59	2547.42	867.145
1883.16	1977.61	3165.85	2571.73	840.215
1884.5	2013.46	3176.66	2595.06	822.51
1885.83	2040.89	3192.96	2616.93	814.636
1887.16	2056.63	3215.66	2636.14	819.554
1888.49	2063.86	3243.9	2653.88	834.418
1889.83	2064.32	3277.08	2670.7	857.549
1891.16	2061.71	3313.12	2687.41	884.883
1892.49	2059.18	3350.74	2704.96	913.271
1893.82	2060.32	3386.77	2723.55	937.943
1895.16	2067.08	3420.35	2743.72	956.905
1896.49	2080.8	3449.71	2765.26	967.966
1897.82	2099.41	3473.35	2786.38	971.519
1899.16	2120.7	3488.59	2804.65	967.247
1900.49	2142.81	3496.74	2819.77	957.368
1901.82	2164.2	3496.59	2830.39	942.142
1903.15	2182.49	3487.61	2835.05	922.863
1904.49	2196.64	3469.05	2832.85	899.728
1905.82	2205.48	3441.05	2823.27	873.682
1907.15	2210.55	3402.03	2806.29	842.506
1908.49	2209.69	3352.82	2781.26	808.316
1909.82	2201.64	3292.17	2746.91	771.12
1911.15	2185.65	3220.24	2702.95	731.571
1912.48	2159.74	3138.13	2648.94	691.826
1913.82	2122.46	3047.49	2584.98	654.09
1915.15	2074.14	2949.99	2512.06	619.322
1916.48	2014.73	2850.25	2432.49	590.799
1917.81	1945.15	2756.22	2350.68	573.511
1919.15	1870.46	2672.74	2271.6	567.295
1920.48	1795.4	2604.32	2199.86	571.99
1921.81	1724.58	2555.46	2140.02	587.523
1923.15	1660.28	2527.64	2093.96	613.322
1924.48	1601.21	2518.12	2059.66	648.35
1925.81	1544.24	2524.72	2034.48	693.302
1927.14	1490.43	2540.85	2015.64	742.761
1928.48	1445.06	2559.94	2002.5	788.338
1929.81	1411.62	2579.48	1995.55	825.804
1931.14	1394.32	2597.29	1995.8	850.631
1932.47	1407.89	2611.34	2009.62	850.968
1933.81	1440.53	2620.47	2030.5	834.343
1935.14	1480.03	2624.42	2052.23	809.204
1936.47	1540.75	2622.78	2081.76	765.116
1937.81	1623.95	2615.46	2119.71	701.104
1939.14	1723.8	2604.98	2164.39	623.086
1940.47	1838.19	2593.67	2215.93	534.211
1941.8	1962.95	2585.77	2274.36	440.398
1943.14	2093.82	2584.02	2338.92	346.624
1944.47	2226.62	2593.06	2409.84	259.116
1945.8	2358.11	2614.27	2486.19	181.127
1947.13	2484.74	2650.07	2567.41	116.907
1948.47	2604.75	2700.21	2652.48	67.502
1949.8	2717.31	2761.63	2739.47	31.3443
1951.13	2819.91	2829.77	2824.84	6.97152
1952.47	2910.61	2902.46	2906.53	5.76636
1953.8	2988.35	2977.54	2982.94	7.64198
1955.13	3051.94	3052.13	3052.04	0.135135
1956.46	3101.03	3123.47	3112.25	15.8683
1957.8	3136.39	3188.82	3162.6	37.0729
1959.13	3157.83	3247.14	3202.49	63.1507
1960.46	3167.12	3296.53	3231.83	91.5075
1961.79	3165.48	3335.15	3250.31	119.974
1963.13	3153.82	3362.26	3258.04	147.389
1964.46	3133.99	3379.86	3256.92	173.858
1965.79	3108.31	3387.69	3248	197.551
1967.13	3079.01	3387.07	3233.04	217.836
1968.46	3047.97	3380.31	3214.14	234.998
1969.79	3018.39	3368.05	3193.22	247.249
1971.12	2991.48	3349.43	3170.45	253.109
1972.46	2968.01	3325.54	3146.78	252.815
1973.79	2948.99	3297.91	3123.45	246.723
1975.12	2932.41	3269.56	3100.98	238.404
1976.45	2918.98	3244.39	3081.69	230.1
1977.79	2908.19	3228.2	3068.2	226.278
1979.12	2899.97	3223.02	3061.5	228.427
1980.45	2890.92	3233.15	3062.04	241.989
1981.79	2880.04	3261.03	3070.54	269.401
1983.12	2865.23	3301.97	3083.6	308.823
1984.45	2846.5	3352.08	3099.29	357.501
1985.78	2822.63	3402.14	3112.39	409.774
1987.12	2795.5	3444.22	3119.86	458.713
1988.45	2766.56	3475.12	3120.84	501.03
1989.78	2738.84	3494.4	3116.62	534.259
1991.12	2715.04	3500.37	3107.71	555.316
1992.45	2699.73	3494.54	3097.14	562.016
1993.78	2696.79	3476.15	3086.47	551.093
1995.11	2708.98	3447.21	3078.1	522.004
1996.45	2734.78	3409.51	3072.15	477.108
1997.78	2769.58	3364.98	3067.28	421.01
1999.11	2809.88	3316.23	3063.05	358.041
2000.44	2852.96	3266.01	3059.49	292.071
2001.78	2898.62	3217.31	3057.96	225.345
2003.11	2945.04	3173.75	3059.39	161.724
2004.44	2993.01	3136.95	3064.98	101.777
2005.78	3039.88	3110.93	3075.41	50.2362
2007.11	3084.78	3096.19	3090.48	8.06678
2008.44	3128.3	3093.38	3110.84	24.6943
2009.77	3170.57	3100.78	3135.67	49.3438
2011.11	3210.63	3113.3	3161.97	68.8243
2012.44	3249.8	3126.63	3188.22	87.0952
2013.77	3288.72	3135.4	3212.06	108.41
2015.1	3328.25	3133.5	3230.87	137.708
2016.44	3367.84	3118.03	3242.94	176.641
2017.77	3409.06	3087.25	3248.16	227.55
2019.1	3449.8	3039.63	3244.72	290.034
2020.44	3489.83	2975.72	3232.78	363.528
2021.77	3527.17	2897.65	3212.41	445.136
2023.1	3561.49	2807.8	3184.65	532.94
2024.43	3589.03	2713.04	3151.04	619.414
2025.77	3609.26	2620.17	3114.71	699.39
2027.1	3621.1	2534.82	3077.96	768.116
2028.43	3625	2463.12	3044.06	821.574
2029.76	3622.47	2413.44	3017.96	854.914
2031.1	3614.32	2389.21	3001.77	866.281
2032.43	3600.87	2393.17	2997.02	853.968
2033.76	3581.79	2419.6	3000.7	821.794
2035.1	3557.75	2461.22	3009.49	775.363
2036.43	3528.93	2505.22	3017.08	723.876
2037.76	3495.95	2544.35	3020.15	672.883
2039.09	3460.11	2574.89	3017.5	625.943
2040.43	3422.34	2593.63	3007.99	585.987
2041.76	3383.89	2601.8	2992.84	553.02
2043.09	3346.19	2599.8	2972.99	527.775
2044.42	3309.19	2589.98	2949.58	508.555
2045.76	3275.16	2574.12	2924.64	495.709
2047.09	3244.93	2556.82	2900.88	486.567
2048.42	3219.26	2541.24	2880.25	479.434
2049.76	3197.49	2530.57	2864.03	471.579
2051.09	3180.56	2527.94	2854.25	461.471
2052.42	3166.28	2534.35	2850.32	446.842
2053.75	3153.99	2548.49	2851.24	428.154
2055.09	3140.15	2569.32	2854.73	403.638
2056.42	3123.4	2594.19	2858.8	374.209
2057.75	3105.3	2619.84	2862.57	343.273
2059.08	3090.02	2643.57	2866.79	315.687
2060.42	3079.34	2665.1	2872.22	292.911
2061.75	3075.85	2684.99	2880.42	276.381
2063.08	3078.86	2704.12	2891.49	264.983
2064.42	3087.42	2722.51	2904.96	258.028
2065.75	3095.78	2742.33	2919.05	249.928
2067.08	3098.61	2763.08	2930.85	237.254
2068.41	3091.48	2784.48	2937.98	217.082
2069.75	3074.47	2804.97	2939.72	190.565
2071.08	3047.61	2822.53	2935.07	159.159
2072.41	3008.12	2835.15	2921.63	122.309
2073.75	2955.38	2841.3	2898.34	80.6688
2075.08	2890.02	2839.14	2864.58	35.9809
2076.41	2816.18	2827.78	2821.98	8.19777
2077.74	2739.63	2808.03	2773.83	48.3605
2079.08	2671.86	2779.25	2725.56	75.9384
2080.41	2617.04	2742.48	2679.76	88.7003
2081.74	2579.24	2699.62	2639.43	85.12
2083.07	2557.17	2653.33	2605.25	67.9934
2084.41	2551.08	2606.37	2578.72	39.1017
2085.74	2556.89	2561.05	2558.97	2.94384
2087.07	2572.67	2519.04	2545.85	37.9243
2088.41	2594.87	2480.44	2537.66	80.9082
2089.74	2623.31	2446.26	2534.78	125.188
2091.07	2655.49	2414.31	2534.9	170.546
2092.4	2691.67	2385.18	2538.43	216.72
2093.74	2731.01	2356.68	2543.85	264.69
2095.07	2775.13	2327.97	2551.55	316.191
2096.4	2822.93	2297.04	2559.98	371.865
2097.73	2873.06	2265.71	2569.39	429.461
2099.07	2919.77	2233.45	2576.61	485.3
2100.4	2961.47	2202.48	2581.98	536.685
2101.73	2997.58	2172.06	2584.82	583.731
2103.07	3028.87	2146.91	2587.89	623.639
2104.4	3055.91	2127.47	2591.69	656.505
2105.73	3080.42	2116.98	2598.7	681.254
2107.06	3102.69	2116.05	2609.37	697.661
2108.4	3124.15	2126.25	2625.2	705.623
2109.73	3144.73	2148.44	2646.58	704.487
2111.06	3164.56	2177.73	2671.15	697.794
2112.39	3185.56	2213.55	2699.55	687.314
2113.73	3209.73	2254.06	2731.9	675.758
2115.06	3239.13	2296.89	2768.01	666.268
2116.39	3274.13	2339.2	2806.66	661.097
2117.73	3314.47	2379.94	2847.21	660.817
2119.06	3358.63	2418.36	2888.49	664.872
2120.39	3405.2	2454.3	2929.75	672.389
2121.72	3452.72	2487.56	2970.14	682.467
2123.06	3500.34	2515.64	3007.99	696.284
2124.39	3548.47	2539.99	3044.23	713.101
2125.72	3598.41	2559.59	3079	734.559
2127.05	3650.41	2574.54	3112.47	760.753
2128.39	3705.52	2584.1	3144.81	792.962
2129.72	3761.56	2589.48	3175.52	828.791
2131.05	3817.97	2590.79	3204.38	867.749
2132.39	3870.74	2589.18	3229.96	906.2
2133.72	3918.38	2586.45	3252.41	941.819
2135.05	3957.96	2582.42	3270.19	972.65
2136.38	3988.25	2579.16	3283.71	996.377
2137.72	4006.88	2579.06	3292.97	1009.62
2139.05	4013.95	2585.54	3299.75	1010.04
2140.38	4009.09	2601.55	3305.32	995.279
2141.71	3993.56	2629.59	3311.58	964.475
2143.05	3969.04	2669.97	3319.51	918.583
2144.38	3938.54	2720.05	3329.29	861.601
2145.71	3904.45	2775.02	3339.73	798.626
2147.05	3870.43	2825.89	3348.16	738.595
2148.38	3840.54	2870.19	3355.37	686.143
2149.71	3816.42	2904.62	3360.52	644.737
2151.04	3800.75	2927.01	3363.88	617.823
2152.38	3793.14	2935.84	3364.49	606.205
2153.71	3792.04	2929.43	3360.74	609.962
2155.04	3794.36	2909.53	3351.94	625.673
2156.37	3798.29	2877.36	3337.82	651.195
2157.71	3800.96	2836.26	3318.61	682.147
2159.04	3801.59	2790.73	3296.16	714.783
2160.37	3800.82	2747.55	3274.19	744.776
2161.71	3800.12	2712.99	3256.55	768.715
2163.04	3798.9	2693.06	3245.98	781.947
2164.37	3798.05	2690.47	3244.26	783.18
2165.7	3796.3	2704.27	3250.28	772.186
2167.04	3795.61	2729.64	3262.63	753.75
2168.37	3796.7	2764.48	3280.59	729.887
2169.7	3801.58	2805.21	3303.4	704.537
2171.04	3810.05	2848.97	3329.51	679.591
2172.37	3822.97	2891.67	3357.32	658.531
2173.7	3840.32	2931.02	3385.67	642.971
2175.03	3861.06	2962.84	3411.95	635.135
2176.37	3885.29	2985.63	3435.46	636.159
2177.7	3913.2	2997.56	3455.38	647.455
2179.03	3944.57	3000.18	3472.38	667.781
2180.36	3977.51	2994.22	3485.86	695.297
2181.7	4010.75	2982.15	3496.45	727.335
2183.03	4042.14	2963.48	3502.81	762.727
2184.36	4069.79	2941.77	3505.78	797.625
2185.7	4092.44	2917.27	3504.85	830.971
2187.03	4108.94	2892.84	3500.89	859.913
2188.36	4118.11	2867.6	3492.85	884.243
2189.69	4120.92	2843.49	3482.21	903.276
2191.03	4118.58	2819.1	3468.84	918.866
2192.36	4112.86	2795.3	3454.08	931.652
2193.69	4104.51	2771.31	3437.91	942.716
2195.02	4095.85	2746.28	3421.06	954.291
2196.36	4086.06	2718.13	3402.09	967.271
2197.69	4077.16	2686.4	3381.78	983.422
2199.02	4069.04	2650.66	3359.85	1002.94
2200.36	4061.89	2613.25	3337.57	1024.34
2201.69	4054.91	2576.91	3315.91	1045.1
2203.02	4049.17	2545.98	3297.58	1062.92
2204.35	4043.39	2522.38	3282.88	1075.51
2205.69	4037.78	2507.46	3272.62	1082.09
2207.02	4032.13	2499.68	3265.9	1083.61
2208.35	4026.8	2494.95	3260.87	1083.18
2209.68	4020.8	2492.4	3256.6	1080.74
2211.02	4014.07	2489.43	3251.75	1078.08
2212.35	4006.39	2485.07	3245.73	1075.73
2213.68	3996.9	2477.77	3237.34	1074.18
2215.02	3985.63	2470.93	3228.28	1071.05
2216.35	3972.79	2467.29	3220.04	1064.55
2217.68	3958.69	2470.53	3214.61	1052.28
2219.01	3942.75	2480.16	3211.46	1034.21
2220.35	3925.84	2497.02	3211.43	1010.32
2221.68	3907.69	2521.42	3214.55	980.242
2223.01	3888.18	2554.06	3221.12	943.368
2224.34	3866.67	2592.82	3229.75	900.75
2225.68	3844.17	2636.7	3240.44	853.811
2227.01	3820.6	2683.17	3251.88	804.279
2228.34	3796.08	2732.3	3264.19	752.209
2229.68	3769.85	2781.38	3275.61	698.96
2231.01	3742.26	2829.95	3286.1	645.1
2232.34	3713.53	2877.64	3295.58	591.067
2233.67	3683.18	2924.39	3303.79	536.547
2235.01	3651.88	2970.72	3311.3	481.648
2236.34	3618.83	3018.9	3318.87	424.211
2237.67	3585.05	3070.68	3327.87	363.711
2239	3551.14	3127.17	3339.16	299.793
2240.34	3516.48	3190.34	3353.41	230.619
2241.67	3481.3	3261.23	3371.27	155.613
2243	3446.26	3341.44	3393.85	74.1197
2244.34	3411.92	3430.74	3421.33	13.3088
2245.67	3377.66	3529.23	3453.45	107.173
2247	3343.49	3634.06	3488.78	205.463
2248.33	3309.17	3744.44	3526.81	307.78
2249.67	3275.41	3856.25	3565.83	410.71
2251	3242.74	3965.98	3604.36	511.407
2252.33	3211.45	4069.38	3640.42	606.649
2253.67	3181.37	4163.6	3672.49	694.541
2255	3152.58	4244.43	3698.5	772.053
2256.33	3125.56	4308.91	3717.24	836.757
2257.66	3100.58	4354.06	3727.32	886.346
2259	3077.42	4376.35	3726.88	918.483
2260.33	3056.95	4373.75	3715.35	931.114
2261.66	3038.95	4345.74	3692.34	924.04
2262.99	3023.58	4292.02	3657.8	896.92
2264.33	3010.5	4213.14	3611.82	850.393
2265.66	2999.42	4109.36	3554.39	784.841
2266.99	2990.17	3982.2	3486.19	701.469
2268.33	2983.35	3833.83	3408.59	601.386
2269.66	2979.17	3669.9	3324.53	488.417
2270.99	2976.59	3494.72	3235.65	366.371
2272.32	2976.4	3315.07	3145.74	239.476
2273.66	2977.9	3137.46	3057.68	112.831
2274.99	2981.82	2969.56	2975.69	8.67368
2276.32	2987.25	2816.6	2901.92	120.663
2277.65	2994.64	2684.24	2839.44	219.483
2278.99	3003.5	2572.19	2787.85	304.982
2280.32	3012.08	2472.49	2742.29	381.549
2281.65	3020.67	2383.75	2702.21	450.371
2282.99	3029.8	2308.59	2669.2	509.967
2284.32	3038.35	2247.96	2643.15	558.892
2285.65	3045.29	2203.61	2624.45	595.159
2286.98	3050.76	2176.08	2613.42	618.498
2288.32	3055.2	2164.97	2610.08	629.489
2289.65	3058.54	2167.83	2613.18	629.829
2290.98	3062.16	2177.52	2619.84	625.533
2292.31	3065.35	2189.53	2627.44	619.302
2293.65	3068.92	2201.37	2635.14	613.453
2294.98	3074.14	2210.83	2642.48	610.451
2296.31	3081.81	2215.57	2648.69	612.529
2297.65	3092.33	2214.75	2653.54	620.545
2298.98	3107.11	2206.99	2657.05	636.48
2300.31	3126.26	2194.34	2660.3	658.964
2301.64	3149.63	2179.5	2664.57	685.988
2302.98	3177.37	2166.54	2671.95	714.76
2304.31	3208.6	2158.57	2683.59	742.488
2305.64	3242.82	2160.49	2701.65	765.323
2306.97	3279.54	2174.77	2727.16	781.192
2308.31	3317	2202.59	2759.8	788.003
2309.64	3353.58	2238.5	2796.04	788.483
2310.97	3388	2278.62	2833.31	784.455
2312.31	3418.89	2318.17	2868.53	778.327
2313.64	3445.31	2352.61	2898.96	772.654
2314.97	3467.09	2378.53	2922.81	769.729
2316.3	3484.1	2393.04	2938.57	771.5
2317.64	3497.21	2393.86	2945.54	780.19
2318.97	3507.43	2378.99	2943.21	797.927
2320.3	3514.78	2348.25	2931.52	824.863
2321.63	3520.12	2301.22	2910.67	861.894
2322.97	3524.2	2240.61	2882.4	907.636
2324.3	3525.67	2169.35	2847.51	959.068
2325.63	3524.88	2093.63	2809.26	1012.05
2326.97	3521.78	2019.3	2770.54	1062.41
2328.3	3516.2	1956.29	2736.24	1103.02
2329.63	3508.53	1913	2710.77	1128.21
2330.96	3498.76	1898.35	2698.55	1131.65
2332.3	3487.57	1923.34	2705.46	1106.08
2333.63	3475.58	1988.59	2732.08	1051.46
2334.96	3462.99	2083.56	2773.27	975.408
2336.29	3450.16	2193.24	2821.7	888.774
2337.63	3438.67	2303.52	2871.1	802.674
2338.96	3428.85	2407.25	2918.05	722.377
2340.29	3421.89	2499.02	2960.45	652.569
2341.63	3416.98	2574.7	2995.84	595.578
2342.96	3414.98	2631.01	3023	554.354
2344.29	3415.38	2667.5	3041.44	528.832
2345.62	3420.07	2686.2	3053.13	518.928
2346.96	3427.41	2691.83	3059.62	520.132
2348.29	3437.84	2689.01	3063.43	529.509
2349.62	3451.13	2685.34	3068.24	541.493
2350.96	3467.2	2688.73	3077.96	550.46
2352.29	3485.15	2707.74	3096.44	549.716
2353.62	3505.02	2744.62	3124.82	537.681
2354.95	3527.17	2795.37	3161.27	517.458
2356.29	3551.12	2853.72	3202.42	493.136
2357.62	3576.15	2916.88	3246.51	466.171
2358.95	3601.38	2985.49	3293.43	435.502
2360.28	3626.63	3059.75	3343.19	400.846
2361.62	3650.78	3140.21	3395.49	361.033
2362.95	3673.85	3225.95	3449.9	316.714
2364.28	3695.39	3317.66	3506.53	267.1
2365.62	3715.53	3413.76	3564.65	213.384
2366.95	3734.22	3512.08	3623.15	157.073
2368.28	3751.1	3611.64	3681.37	98.6118
2369.61	3766.87	3710.71	3738.79	39.7143
2370.95	3781.81	3806.26	3794.03	17.2912
2372.28	3795.89	3897.82	3846.85	72.077
2373.61	3808.45	3985.02	3896.73	124.851
2374.94	3818.92	4068.06	3943.49	176.164
2376.28	3828.79	4145.31	3987.05	223.815
2377.61	3836.69	4217.26	4026.98	269.106
2378.94	3843.56	4282.57	4063.07	310.43
2380.28	3849.28	4340.88	4095.08	347.614
2381.61	3854.43	4391.39	4122.91	379.683
2382.94	3858.64	4434.74	4146.69	407.367
2384.27	3863.07	4470.1	4166.58	429.237
2385.61	3867.52	4497.82	4182.67	445.691
2386.94	3872.38	4517.92	4195.15	456.469
2388.27	3877.07	4531.29	4204.18	462.599
2389.6	3882.2	4538.4	4210.3	464.004
2390.94	3886.9	4538.65	4212.77	460.857
2392.27	3890.5	4532.95	4211.73	454.285
2393.6	3893.2	4521.66	4207.43	444.39
2394.94	3895.68	4504.4	4200.04	430.434
2396.27	3897.05	4481.09	4189.07	412.981
2397.6	3897.95	4452.82	4175.38	392.355
2398.93	3899.44	4420.23	4159.84	368.254
2400.27	3901.79	4383.56	4142.68	340.657
2401.6	3905.37	4344.48	4124.92	310.496
2402.93	3911.75	4304.67	4108.21	277.835
2404.26	3921.92	4263.97	4092.94	241.869
2405.6	3934.74	4224.3	4079.52	204.747
2406.93	3950.91	4187.2	4069.05	167.076
2408.26	3968.7	4152.33	4060.51	129.848
2409.6	3987.14	4120.68	4053.91	94.4271
2410.93	4003.66	4092.84	4048.25	63.0567
2412.26	4016.11	4069.19	4042.65	37.5295
2413.59	4020.86	4049.15	4035.01	20.0019
2414.93	4014.56	4033.92	4024.24	13.6873
2416.26	3994.31	4023.2	4008.75	20.4252
2417.59	3958.57	4016.52	3987.55	40.9746
2418.92	3905.17	4013.75	3959.46	76.7836
2420.26	3836.26	4014.34	3925.3	125.92
2421.59	3754.88	4016.94	3885.91	185.305
2422.92	3666.93	4021.6	3844.27	250.793
2424.26	3576.13	4027.73	3801.93	319.33
2425.59	3487.83	4034.66	3761.24	386.671
2426.92	3407.37	4042.5	3724.94	449.105
2428.25	3340.08	4050.64	3695.36	502.443
2429.59	3288.85	4059.51	3674.18	544.938
2430.92	3254.96	4067.62	3661.29	574.634
2432.25	3236.5	4076.57	3656.53	594.015
2433.59	3233.24	4086.22	3659.73	603.148
2434.92	3242.93	4096.73	3669.83	603.726
2436.25	3261.02	4108.08	3684.55	598.963
2437.58	3284.18	4121.28	3702.73	591.917
2438.92	3309.97	4135.23	3722.6	583.544
2440.25	3337.06	4150.95	3744	575.502
2441.58	3365.11	4168.7	3766.9	568.228
2442.91	3393.15	4188.1	3790.62	562.112
2444.25	3419.08	4208.68	3813.88	558.33
2445.58	3442.4	4230.99	3836.7	557.616
2446.91	3461.04	4254.61	3857.82	561.138
2448.25	3475.11	4279.88	3877.49	569.062
2449.58	3482.98	4306.73	3894.85	582.48
2450.91	3486.42	4335.64	3911.03	600.486
2452.24	3483.47	4366.76	3925.12	624.585
2453.58	3475.36	4401.3	3938.33	654.742
2454.91	3460.72	4438.4	3949.56	691.328
2456.24	3440.51	4478.09	3959.3	733.681
2457.57	3414.6	4520.3	3967.45	781.847
2458.91	3384.53	4564.63	3974.58	834.456
2460.24	3348.78	4610.6	3979.69	892.242
2461.57	3308.18	4656.79	3982.49	953.613
2462.91	3262.9	4702.96	3982.93	1018.28
2464.24	3213.31	4746.53	3979.92	1084.15
2465.57	3159.26	4786.73	3973	1150.79
2466.9	3101.56	4820.71	3961.14	1215.63
2468.24	3040.11	4847.68	3943.9	1278.15
2469.57	2977.12	4865.83	3921.48	1335.52
2470.9	2914.62	4875.96	3895.29	1386.87
2472.23	2853.83	4878.52	3866.17	1431.67
2473.57	2795.02	4873.66	3834.34	1469.81
2474.9	2739.66	4861.76	3800.71	1500.56
2476.23	2688.67	4845.84	3767.26	1525.35
2477.57	2642.16	4826.17	3734.16	1544.33
2478.9	2600.01	4803.95	3701.98	1558.42
2480.23	2562.95	4779.33	3671.14	1567.21
2481.56	2531.17	4753.85	3642.51	1571.67
2482.9	2502.39	4727.85	3615.12	1573.63
2484.23	2476.23	4703.83	3590.03	1575.15
2485.56	2450.61	4683.63	3567.12	1578.98
2486.89	2426.11	4667.94	3547.03	1585.21
2488.23	2400.08	4657.64	3528.86	1596.33
2489.56	2372.32	4653.16	3512.74	1612.8
2490.89	2339.21	4653.75	3496.48	1636.63
2492.23	2302.67	4658.65	3480.66	1665.93
2493.56	2261.74	4665.63	3463.69	1699.81
2494.89	2216.88	4671.48	3444.18	1735.66
2496.22	2168.53	4673.46	3421	1771.26
2497.56	2120.98	4671.77	3396.37	1803.69
2498.89	2075.73	4669.37	3372.55	1833.98
2500.22	2036.01	4667.24	3351.62	1860.56
2501.55	2004.46	4662.28	3333.37	1879.37
2502.89	1984.59	4642.8	3313.69	1879.64
2504.22	1976.24	4605.8	3291.02	1859.38
2505.55	1982.11	4554.63	3268.37	1819.05
2506.89	2002.19	4494.31	3248.25	1762.2
2508.22	2034.98	4429.24	3232.11	1693
2509.55	2073.88	4365.42	3219.65	1620.37
2510.88	2112.06	4306.2	3209.13	1551.49
2512.22	2144.32	4249.71	3197.02	1488.73
2513.55	2166.28	4192.74	3179.51	1432.92
2514.88	2176.77	4132.1	3154.43	1382.62
2516.22	2176.42	4063.2	3119.81	1334.15
2517.55	2165.19	3986.21	3075.7	1287.66
2518.88	2142.17	3899.71	3020.94	1242.77
2520.21	2112.24	3803.34	2957.79	1195.79
2521.55	2080.09	3699.3	2889.69	1144.95
2522.88	2052.76	3591.09	2821.93	1087.76
2524.21	2036.83	3482.79	2759.81	1022.45
2525.54	2036.78	3378.55	2707.66	948.776
2526.88	2053.29	3286.61	2669.95	872.092
2528.21	2082.44	3216.19	2649.32	801.686
2529.54	2121.67	3173.59	2647.63	743.815
2530.88	2171	3130.14	2650.57	678.21
2532.21	2224.04	3083.98	2654.01	608.065
2533.54	2268.82	3035.2	2652.01	541.912
2534.87	2295.87	2989.4	2642.64	490.4
2536.21	2302.9	2945.87	2624.39	454.654
2537.54	2288.59	2901.73	2595.16	433.551
2538.87	2256.33	2855.83	2556.08	423.914
2540.2	2210.24	2813.83	2512.04	426.798
2541.54	2158.57	2776.54	2467.56	436.971
2542.87	2108.74	2746.59	2427.67	451.024
2544.2	2068.41	2722.98	2395.69	462.854
2545.54	2040.04	2706.01	2373.02	470.912
2546.87	2017.03	2694.17	2355.6	478.813
2548.2	1994.03	2687.33	2340.68	490.236
2549.53	1973.95	2682.77	2328.36	501.206
2550.87	1958.97	2677.45	2318.21	508.047
2552.2	1950.52	2665.19	2307.85	505.35
2553.53	1945.46	2640.64	2293.05	491.561
2554.86	1942.74	2599.24	2270.99	464.216
2556.2	1943.14	2541.2	2242.17	422.895
2557.53	1946.74	2469.46	2208.1	369.616
2558.86	1956.36	2389.45	2172.91	306.238
2560.2	1971.31	2309.59	2140.45	239.201
2561.53	1987.68	2241.58	2114.63	179.536
2562.86	1996.35	2196.54	2096.45	141.551
2564.19	1997.21	2176.78	2086.99	126.975
2565.53	1989.92	2167.96	2078.94	125.89
2566.86	1978.94	2165.75	2072.35	132.095
2568.19	1967.06	2171.47	2069.26	144.543
2569.52	1957.95	2186.39	2072.17	161.529
2570.86	1950.75	2208.02	2079.38	181.918
2572.19	1943.6	2230.08	2086.84	202.572
2573.52	1933.46	2251.25	2092.35	224.714
2574.86	1921.7	2269.64	2095.67	246.034
2576.19	1907.66	2285.17	2096.41	266.941
2577.52	1893.4	2295.45	2094.43	284.292
2578.85	1877.68	2301.67	2089.67	299.81
2580.19	1862.52	2304.17	2083.34	312.296
2581.52	1846.63	2306	2076.32	324.823
2582.85	1831.89	2307.89	2069.89	336.587
2584.18	1819.9	2310.09	2064.99	346.62
2585.52	1813.75	2312.73	2063.24	352.831
2586.85	1813.39	2315.73	2064.56	355.21
2588.18	1820.74	2318.34	2069.54	351.853
2589.52	1835.62	2320.09	2077.85	342.573
2590.85	1853.44	2318.24	2085.84	328.661
2592.18	1872.73	2314.19	2093.46	312.158
2593.51	1891.98	2308.04	2100.01	294.203
2594.85	1909.11	2301.96	2105.53	277.791
2596.18	1919.95	2297.3	2108.62	266.832
2597.51	1921.58	2294.91	2108.25	263.984
2598.84	1910.9	2295.72	2103.31	272.108
2600.18	1889.11	2299.79	2094.45	290.396
2601.51	1858.57	2304.49	2081.53	315.311
2602.84	1824.99	2305.14	2065.07	339.517
2604.18	1794.71	2304.38	2049.54	360.388
2605.51	1776.77	2305.54	2041.16	373.892
2606.84	1772.66	2312.95	2042.8	382.039
2608.17	1778.68	2328.7	2053.69	388.921
2609.51	1792.92	2354.84	2073.88	397.334
2610.84	1816.87	2387.07	2101.97	403.191
2612.17	1847.46	2420.57	2134.02	405.246
2613.51	1877.61	2451.46	2164.54	405.769
2614.84	1898.06	2475.35	2186.7	408.209
2616.17	1907.89	2487.83	2197.86	410.084
2617.5	1910.04	2488.31	2199.18	408.898
2618.84	1908.61	2474.62	2191.62	400.227
2620.17	1906.74	2446.95	2176.85	381.992
2621.5	1907.69	2407.26	2157.47	353.251
2622.83	1915.54	2360.27	2137.91	314.473
2624.17	1931.89	2310.96	2121.42	268.042
2625.5	1953.9	2264.97	2109.44	219.958
2626.83	1975.14	2226.42	2100.78	177.682
2628.17	1993.86	2199.83	2096.84	145.642
2629.5	2007	2187.62	2097.31	127.713
2630.83	2012.9	2184.52	2098.71	121.352
2632.16	2009.16	2184.25	2096.7	123.808
2633.5	1995.41	2184.46	2089.94	133.679
2634.83	1972.7	2184.67	2078.69	149.882
2636.16	1944.71	2180.46	2062.59	166.706
2637.49	1913.61	2172	2042.8	182.715
2638.83	1882.31	2161.54	2021.93	197.446
2640.16	1853.86	2154.44	2004.15	212.542
2641.49	1830.58	2153.08	1991.83	228.041
2642.83	1814.65	2163.52	1989.09	246.693
2644.16	1809.32	2187.6	1998.46	267.482
2645.49	1815.75	2229.21	2022.48	292.361
2646.82	1834.24	2284.66	2059.45	318.49
2648.16	1862.71	2334.27	2098.49	333.443
2649.49	1897.55	2366.24	2131.89	331.414
2650.82	1933.87	2379.48	2156.67	315.095
2652.15	1968.45	2373.71	2171.08	286.561
2653.49	1997.79	2353.05	2175.42	251.209
2654.82	2018.35	2323.59	2170.97	215.837
2656.15	2029.61	2293.29	2161.45	186.451
2657.49	2031.71	2270.14	2150.92	168.595
2658.82	2024.42	2262.37	2143.4	168.255
2660.15	2008.99	2272	2140.49	185.974
[truncated: 2,504 more rows]
