# Supplementary material for: Ionogel thin films as a compatibilizing pretreatment for electrospray deposition
Source: Royal Society of Chemistry journal article supplement (doi:10.1039/d5lp00359h), 2026-01-01
Supplement: d5lp00359h1.zip [file D data.xlsx]

## Sheet: Sheet1
Lateral	Height Data	Height Data
µm	nm	nm
	5.1	5.2
0	-2.41172	-1.83474
1.33274	-2.35234	-2.43749
2.66548	-2.22016	-2.55445
3.99822	-1.61334	-2.62471
5.33096	-1.12121	-2.36764
6.66371	-0.594145	-1.89899
7.99645	-0.297756	-1.54373
9.32919	0.116535	-1.44576
10.6619	0.0255432	-1.19161
11.9947	0.589243	-0.977527
13.3274	0.856938	-0.652959
14.6602	1.17409	-0.46241
15.9929	0.910169	-0.254176
17.3256	0.81287	-0.144488
18.6584	0.537823	0.255564
19.9911	0.485921	0.577674
21.3239	0.564374	1.05764
22.6566	0.665388	1.04902
23.9893	0.417259	1.52987
25.3221	0.832859	1.36266
26.6548	0.924033	1.77256
27.9876	1.17054	1.50637
29.3203	1.1907	1.29325
30.653	1.35278	1.02699
31.9858	1.5387	1.10225
33.3185	1.62704	0.907108
34.6513	1.49978	0.942411
35.984	2.05651	0.593378
37.3167	2.31543	0.491961
38.6495	2.50382	0.537055
39.9822	2.85926	0.480282
41.315	3.48662	0.566063
42.6477	3.71646	0.790816
43.9805	3.998	0.639074
45.3132	3.04901	0.347678
46.6459	2.7451	0.434843
47.9787	2.64722	0.291758
49.3114	3.02304	0.417566
50.6442	2.6087	0.692943
51.9769	2.37909	0.726402
53.3096	1.84821	0.496941
54.6424	1.65208	0.507944
55.9751	1.6885	0.525038
57.3079	1.45497	0.552128
58.6406	0.941163	0.341296
59.9733	0.536247	0.778764
61.3061	0.645969	0.620347
62.6388	0.654648	0.722154
63.9716	0.540506	0.843143
65.3043	0.289574	1.1013
66.6371	0.27567	0.856306
67.9698	-0.125444	0.846736
69.3025	-0.164526	1.08676
70.6353	-0.201789	1.06919
71.968	-0.367345	0.903137
73.3008	-0.536711	0.84249
74.6335	-0.573712	0.646827
75.9662	-0.590652	0.823263
77.299	-0.831599	0.750019
78.6317	-0.655955	0.661467
79.9645	-0.41727	0.684072
81.2972	-0.370983	0.568035
82.6299	-0.272452	0.312523
83.9627	0.132094	0.181498
85.2954	0.331161	0.324629
86.6282	0.672919	0.378624
87.9609	0.760261	0.341556
89.2936	0.565535	0.342727
90.6264	0.835625	0.639995
91.9591	0.697296	0.725347
93.2919	0.509685	1.07686
94.6246	0.537485	1.17452
95.9574	0.293558	1.11455
97.2901	0.161529	0.635936
98.6228	0.0370802	0.877954
99.9556	0.185202	0.735464
101.288	0.487612	0.694202
102.621	0.303084	0.506836
103.954	0.117025	0.675311
105.287	0.320071	0.323602
106.619	0.290668	0.194216
107.952	0.386742	0.0577562
109.285	0.475831	0.050027
110.618	0.544614	-0.19434
111.95	0.0811638	0.0867635
113.283	0.222331	-0.347441
114.616	0	0
115.948	-0.0801241	0.27276
117.281	-0.24934	0.314621
118.614	0.501811	0.227426
119.947	0.529713	0.380763
121.279	0.649677	0.144805
122.612	0.468896	0.262822
123.945	-0.0227058	0.245618
125.278	-0.173738	0.0874342
126.61	-0.442293	-0.0784701
127.943	-0.298328	-0.236284
129.276	-0.0922968	0.132795
130.609	0.0460205	0.154685
131.941	0.354977	0.181147
133.274	0.443679	0.0842688
134.607	0.412868	0.241475
135.94	0.630694	-0.0960208
137.272	0.592387	0.198371
138.605	0.790612	0.263854
139.938	0.6055	0.332444
141.271	0.289881	0.147008
142.603	0.499999	0.333902
143.936	0.884019	0.148067
145.269	0.919543	0.33246
146.602	1.32735	0.141006
147.934	0.954666	0.443396
149.267	1.27235	0.117922
150.6	0.779131	0.0315581
151.932	0.582169	0.211343
153.265	0.21028	0.163267
154.598	-0.0656841	0.134261
155.931	-0.0853608	0.255309
157.263	-0.0716388	0.405643
158.596	-0.261936	0.706687
159.929	-0.140346	0.528113
161.262	0.0608871	0.625777
162.594	0.332896	0.788125
163.927	0.655044	0.916001
165.26	1.12447	1.41106
166.593	1.08112	2.03816
167.925	0.746576	2.65059
169.258	0.763027	3.20198
170.591	0.531623	3.632
171.924	0.941305	4.25356
173.256	1.12454	4.88467
174.589	1.17617	2.82384
175.922	0.952626	2.83271
177.255	1.20226	2.41654
178.587	0.92689	2.476
179.92	0.73866	2.04619
181.253	0.52814	2.27052
182.586	0.682796	2.17351
183.918	0.577881	2.369
185.251	0.447081	2.35191
186.584	0.289894	2.60406
187.916	0.237261	2.48659
189.249	-0.204834	2.48174
190.582	-0.144917	2.34326
191.915	-0.303125	2.19813
193.247	-0.171337	2.30923
194.58	-0.11061	2.55954
195.913	0	2.18423
197.246	0.283547	2.42802
198.578	0.349751	2.30547
199.911	0.425362	2.17482
201.244	0.87545	2.29141
202.577	0.552205	2.40388
203.909	0.557465	2.37349
205.242	0.283325	2.06669
206.575	0.362087	1.74369
207.908	0.184198	1.80897
209.24	0.250647	1.90749
210.573	0.323469	2.02902
211.906	0.148627	2.28302
213.239	0.105096	2.01774
214.571	-0.0430264	1.83601
215.904	0.468391	1.74673
217.237	0.263255	1.75618
218.57	0.444484	1.3672
219.902	0.394924	1.34669
221.235	0.604856	0.981818
222.568	0.567494	1.30643
223.9	0.893573	1.35958
225.233	0.572439	1.77046
226.566	0.592474	2.04431
227.899	0.223757	2.91277
229.231	0.482414	2.96106
230.564	0.394125	3.50227
231.897	0.582872	3.63128
233.23	0.30912	3.80025
234.562	0.830069	3.36419
235.895	0.904946	2.57035
237.228	1.12696	2.47067
238.561	1.23312	2.62383
239.893	1.57861	2.53928
241.226	1.26793	2.59007
242.559	1.16029	2.53329
243.892	1.15569	2.24236
245.224	1.14366	2.47946
246.557	1.0125	2.62951
247.89	0.903821	2.67009
249.223	1.21838	2.58228
250.555	1.21401	2.85854
251.888	1.75617	2.48647
253.221	1.96158	2.45081
254.554	1.92255	2.39502
255.886	1.8835	2.44822
257.219	2.10676	1.73599
258.552	1.97007	2.0277
259.884	2.47043	2.11233
261.217	2.47987	2.09557
262.55	2.7191	2.09349
263.883	2.30269	2.35239
265.215	2.60137	2.10556
266.548	2.12867	2.20975
267.881	2.37674	1.91556
269.214	2.2393	1.96449
270.546	2.32716	1.86496
271.879	1.76516	1.60819
273.212	1.93415	1.32374
274.545	1.86089	1.27675
275.877	1.78423	1.2281
277.21	1.70873	1.17385
278.543	1.63926	0.986675
279.876	1.45529	0.920847
281.208	1.66552	0.613141
282.541	1.77706	0.702735
283.874	1.65127	0.583023
285.207	1.79177	1.00529
286.539	1.58627	0.965847
287.872	1.79465	0.809834
289.205	1.93668	1.16416
290.538	2.38561	1.1465
291.87	2.50748	1.23011
293.203	2.78381	0.905803
294.536	2.83617	0.795908
295.869	3.15998	0.538934
297.201	3.13031	0.764457
298.534	3.49187	0.593963
299.867	3.62447	0.63208
301.199	3.89102	0.126271
302.532	3.91434	-0.170097
303.865	4.06741	-0.473316
305.198	4.1091	-0.384852
306.53	4.29198	-0.517949
307.863	4.36723	-0.253017
309.196	4.82703	-0.468482
310.529	4.7787	-0.298012
311.861	4.81598	-0.728088
313.194	4.81242	-0.495164
314.527	4.63869	-0.439022
315.86	4.30041	-0.188515
317.192	4.32299	-4.54747e-14
318.525	4.36173	0.729019
319.858	4.30051	0.832736
321.191	4.27493	0.749875
322.523	4.55083	0.592904
323.856	4.7575	0.118113
325.189	4.87933	-0.0201491
326.522	5.15603	-0.151243
327.854	5.20005	-0.123752
329.187	5.37107	0.0821619
330.52	5.28604	0.342175
331.853	5.69014	0.388456
333.185	5.45494	0.830128
334.518	5.4418	0.525683
335.851	5.29449	0.582891
337.183	5.39884	0.648936
338.516	5.38859	0.854719
339.849	5.63606	0.45
341.182	5.63664	1.0729
342.514	5.62806	0.99376
343.847	5.36221	1.18741
345.18	5.34831	1.41235
346.513	5.35075	1.53186
347.845	5.99333	1.78512
349.178	5.62411	1.78782
350.511	5.58335	1.77784
351.844	5.39577	1.75716
353.176	5.33645	1.85236
354.509	5.09096	2.06039
355.842	5.64947	1.86497
357.175	5.95529	1.87889
358.507	7.55041	1.60836
359.84	9.77561	1.43098
361.173	14.1197	1.36613
362.506	20.8687	1.30028
363.838	30.9816	1.36556
365.171	44.9675	1.06391
366.504	63.6873	1.15028
367.837	87.0149	1.26811
369.169	114.283	1.16073
370.502	138.688	1.32668
371.835	156.575	1.52401
373.167	167.973	1.24099
374.5	171.878	1.48012
375.833	168.518	1.76173
377.166	157.778	1.82343
378.498	140.824	1.90567
379.831	118.294	2.01087
381.164	94.1392	2.01028
382.497	71.202	2.52678
383.829	55.1	2.67208
385.162	46.9608	2.40646
386.495	39.837	2.34844
387.828	33.6724	2.38897
389.16	28.7588	2.28124
390.493	24.2798	2.40776
391.826	21.2394	1.90532
393.159	18.1345	1.91626
394.491	15.8237	2.10841
395.824	13.9705	2.36112
397.157	12.6171	2.66116
398.49	11.4414	2.86094
399.822	10.7551	2.68346
401.155	9.75375	2.99531
402.488	9.01563	2.9249
403.821	8.53281	2.70708
405.153	8.29722	2.73151
406.486	7.79603	2.89233
407.819	7.64759	2.81456
409.151	7.73884	2.99719
410.484	7.55725	3.19926
411.817	7.96302	2.91196
413.15	8.068	2.88892
414.482	8.335	3.2824
415.815	8.11826	3.4649
417.148	8.28181	3.53515
418.481	8.08779	3.7307
419.813	8.29062	3.66602
421.146	8.40692	3.70634
422.479	8.8078	3.60669
423.812	8.60682	3.62223
425.144	8.91403	3.51451
426.477	8.98371	3.66913
427.81	9.29577	3.72307
429.143	9.21341	3.80037
430.475	9.09863	3.77999
431.808	8.84364	4.04193
433.141	8.85263	4.08908
434.474	9.28888	4.28571
435.806	9.28874	4.63101
437.139	9.34789	4.61014
438.472	9.85974	4.45728
439.805	10.1971	4.55629
441.137	10.5793	4.91918
442.47	11.1089	5.03491
443.803	11.1318	4.88328
445.135	11.0033	4.84363
446.468	10.9949	4.81075
447.801	11.2686	4.79711
449.134	11.3503	5.06309
450.466	12.0116	5.10554
451.799	12.3962	5.7867
453.132	12.6183	5.33455
454.465	12.9312	4.96544
455.797	13.839	5.2151
457.13	14.4366	5.60154
458.463	15.1575	5.3499
459.796	15.3196	5.19481
461.128	14.9977	4.90695
462.461	14.5685	5.13186
463.794	14.7029	5.25738
465.127	14.4428	5.26399
466.459	14.5606	5.2638
467.792	14.4651	5.25125
469.125	14.9227	5.09826
470.458	15.069	5.06072
471.79	15.3895	5.03039
473.123	15.5095	4.89503
474.456	15.6813	4.92273
475.789	15.9314	5.1308
477.121	16.5554	5.3953
478.454	16.9915	5.70157
479.787	17.7029	5.90553
481.12	18.8304	5.99173
482.452	20.6576	5.83444
483.785	23.0784	5.82817
485.118	26.4307	6.13357
486.45	30.4601	6.51761
487.783	35.026	6.9699
489.116	39.352	7.21022
490.449	43.1827	7.44712
491.781	44.6009	7.76731
493.114	44.3744	8.25466
494.447	42.583	7.10409
495.78	39.7127	6.80477
497.112	37.0218	6.30892
498.445	34.7224	6.03235
499.778	32.7634	5.77554
501.111	30.8108	5.82489
502.443	29.3864	6.07874
503.776	28.0045	6.40684
505.109	27.1669	6.40852
506.442	26.7639	6.56138
507.774	27.1847	6.48391
509.107	27.9381	6.79774
510.44	29.5134	6.75578
511.773	31.5042	6.59939
513.105	34.7003	6.84781
514.438	38.8265	7.27011
515.771	43.3713	7.35606
517.104	46.6118	7.34201
518.436	48.9466	7.61304
519.769	51.2531	7.92779
521.102	53.2153	8.15022
522.434	54.8992	8.39378
523.767	56.8928	8.52686
525.1	58.2809	8.67084
526.433	59.1319	8.70372
527.765	59.5522	9.00609
529.098	59.9327	9.08232
530.431	60.3074	9.55261
531.764	60.7022	9.53859
533.096	61.0067	9.52531
534.429	60.9727	9.77827
535.762	61.1078	9.92939
537.095	61.0645	10.0951
538.427	61.3754	10.2684
539.76	61.0963	10.4393
541.093	61.339	10.4687
542.426	61.8511	10.3449
543.758	63.5382	10.444
545.091	66.6859	10.5231
546.424	72.1408	10.0741
547.757	81.1237	10.2327
549.089	95.6905	10.1494
550.422	117.674	10.0682
551.755	148.592	10.2478
553.088	189.366	10.3155
554.42	240.437	10.1349
555.753	299.874	10.2096
557.086	352.956	9.9238
558.418	392.951	10.2798
559.751	422.577	10.2808
561.084	442.62	10.6499
562.417	452.147	10.3718
563.749	448.645	10.1822
565.082	431.107	9.86075
566.415	401.263	10.0701
567.748	361.043	9.97051
569.08	313.485	10.3244
570.413	262.905	10.7724
571.746	214.864	11.0417
573.079	174.443	11.349
574.411	149.323	11.6636
575.744	130.649	11.9477
577.077	114.613	11.6625
578.41	100.863	11.6697
579.742	89.3274	11.1202
581.075	80.0669	10.9289
582.408	72.2048	11.0615
583.741	65.3463	11.3731
585.073	60.2744	11.7644
586.406	55.6854	13.2394
587.739	52.1581	15.5641
589.072	49.1941	19.1353
590.404	46.6768	24.6327
591.737	44.2625	33.2074
593.07	42.6415	45.4342
594.402	41.0335	61.6955
595.735	39.9115	82.3348
597.068	38.8017	105.722
598.401	38.679	127.694
599.733	38.3957	140.501
601.066	39.618	143.12
602.399	42.5851	138.307
603.732	48.114	126.523
605.064	58.0282	108.622
606.397	74.4681	87.9837
607.73	98.5382	68.2246
609.063	132.004	53.4526
610.395	176.61	46.3622
611.728	231.861	40.822
613.061	292.269	35.3308
614.394	347.386	30.83
615.726	397.878	27.1929
617.059	442.99	24.3414
618.392	481.638	21.7859
619.725	512.633	19.7877
621.057	534.815	17.6332
622.39	546.939	16.5131
623.723	548.332	14.8924
625.056	537.747	14.3491
626.388	514.797	13.7394
627.721	480.253	13.2528
629.054	435.503	12.2194
630.386	383.084	12.1235
631.719	328.633	11.348
633.052	278.198	11.1267
634.385	239.168	10.7285
635.717	219.337	10.6485
637.05	228.392	10.7663
638.383	253.926	10.83
639.716	293.598	10.9761
641.048	346.746	10.8967
642.381	396.91	11.1448
643.714	441.613	12.0859
645.047	478.676	14.8497
646.379	505.679	20.0463
647.712	520.381	28.7142
649.045	521.672	42.6299
650.378	508.646	64.6231
651.71	481.305	96.8079
653.043	440.54	142.017
654.376	388.956	201.416
655.709	330.07	275.002
657.041	269.306	356.153
658.374	212.642	428.733
659.707	165.774	490.487
661.04	137.262	542.868
662.372	116.562	582.413
663.705	98.8297	610.599
665.038	84.1047	625.602
666.371	71.1871	627.447
667.703	61.3899	615.469
669.036	52.8809	591.346
670.369	46.3073	554.808
671.701	40.634	507.817
673.034	36.1222	452.238
674.367	32.739	390.898
675.7	29.9946	326.698
677.032	27.7116	264.859
678.365	26.5859	209.356
679.698	26.3635	164.676
681.031	27.5151	136.525
682.363	30.8492	114.787
683.696	37.9412	96.5348
685.029	49.9725	81.3901
686.362	68.6922	68.5348
687.694	96.0299	57.6987
689.027	133.574	49.2594
690.36	180.628	42.2554
691.693	236.917	36.5035
693.025	291.596	31.5098
694.358	334.631	27.8448
695.691	367.063	24.753
697.024	388.238	21.8607
698.356	400.891	19.9627
699.689	404.937	18.7689
701.022	403.217	17.476
702.355	397.133	16.8096
703.687	388.502	16.34
705.02	377.959	16.6389
706.353	366.36	18.0218
707.685	352.636	21.2864
709.018	336.605	26.8567
710.351	317.2	38.4283
711.684	293.998	57.9996
713.016	265.363	88.1402
714.349	230.725	131.956
715.682	190.352	193.244
717.015	149.705	273.252
718.347	115.884	372.868
719.68	98.0673	478.988
721.013	84.0508	578.984
722.346	71.7957	672.916
723.678	61.5923	758.938
725.011	53.1017	834.703
726.344	46.2859	899.49
727.677	40.8427	952.02
729.009	36.5181	991.665
730.342	33.4373	1017.67
731.675	32.0725	1029.46
733.008	32.4646	1027.5
734.34	35.9791	1009.97
735.673	43.6915	977.358
737.006	58.4321	929.428
738.339	82.7205	866.913
739.671	119.848	790.724
741.004	172.058	704.32
742.337	242.237	610.016
743.669	330.36	512.243
745.002	430.648	417.341
746.335	526.186	331.17
747.668	615.337	258.849
749	695.383	208.78
750.333	763.511	174.485
751.666	817.726	145.029
752.999	856.701	119.599
754.331	877.826	99.6666
755.664	880.024	82.3357
756.997	863.056	68.6371
758.33	826.679	58.0701
759.662	771.745	48.9001
760.995	699.986	41.9528
762.328	615.532	36.5278
763.661	522.89	31.5733
764.993	428.931	27.3445
766.326	340.621	24.1856
767.659	265.969	21.2259
768.992	213.387	19.3729
770.324	180.468	17.5788
771.657	150.893	16.3092
772.99	126.403	15.494
774.323	106.105	15.1765
775.655	89.4006	15.8511
776.988	76.2631	18.7104
778.321	65.588	23.6225
779.653	57.0169	33.6284
780.986	51.1922	49.7712
782.319	46.4437	75.9592
783.652	46.1497	114.362
784.984	49.7241	168.298
786.317	59.1316	239.854
787.65	76.4989	329.85
788.983	103.95	429.309
790.315	142.793	524.706
791.648	194.888	614.439
792.981	259.037	698.219
794.314	329.587	773.563
795.646	390.638	840.358
796.979	438.213	897.722
798.312	470.352	944.211
799.645	485.887	980.103
800.977	483.849	1005.93
802.31	464.5	1021.8
803.643	429.48	1028.2
804.976	381.752	1026.08
806.308	325.117	1016.02
807.641	265.579	998.784
808.974	209.997	975.745
810.307	164.768	949.38
811.639	137.752	920.748
812.972	122.313	892.153
814.305	113.361	864.975
815.637	111.936	840.671
816.97	121.669	820.048
818.303	143.801	805.408
819.636	180.567	796.666
820.968	233.956	793.178
822.301	304.12	792.597
823.634	385.76	795.32
824.967	464.431	799.198
826.299	535.95	803.89
827.632	600.435	807.42
828.965	656.623	809.027
830.298	706.315	807.666
831.63	748.509	801.707
832.963	784.657	787.796
834.296	814.747	764.477
835.629	839.529	730.701
836.961	859.186	684.571
838.294	874.11	625.93
839.627	885.089	555.918
840.96	892.098	477.798
842.292	894.725	396.091
843.625	892.53	317.449
844.958	885.337	250.404
846.291	872.279	204.893
847.623	853.531	183.724
848.956	828.83	174.447
850.289	798.884	178.34
851.622	764.555	197.438
852.954	728.229	234.263
854.287	691.591	288.528
855.62	659.356	359.416
856.952	633.969	432.527
858.285	619.064	497.937
859.618	614.284	556.581
860.951	618.035	607.109
862.283	622.406	648.982
863.616	621.212	682.254
864.949	609.165	706.611
866.282	583.081	721.956
867.614	541.231	727.768
868.947	485.829	723.09
870.28	418.574	708.011
871.613	345.853	679.474
872.945	274.839	638.249
874.278	214.901	583.004
875.611	176.617	515.769
876.944	158.607	439.067
878.276	148.083	358.881
879.609	148.28	282.489
880.942	160.664	219.813
882.275	186.001	181.244
883.607	226.487	160
884.94	281.09	147.451
886.273	343.547	145.497
887.606	401.842	157.752
888.938	454.269	185.65
890.271	500.617	230.95
891.604	541.939	294.395
892.936	578.9	374.761
894.269	611.398	456.068
895.602	638.707	526.286
896.935	661.587	584.023
898.267	679.393	629.906
899.6	692.652	662.879
900.933	701.177	684.392
902.266	706.246	695.221
903.598	709.158	697.765
904.931	713.237	693.566
906.264	711.391	685.389
907.597	703.131	674.783
908.929	690.473	664.728
910.262	673.775	655.897
911.595	653.936	648.87
912.928	632.549	643.563
914.26	610.828	638.682
915.593	590.231	631.516
916.926	571.69	619.629
918.259	555.186	600.104
919.591	540.632	570.161
920.924	526.69	528.322
922.257	512.369	475.013
923.59	496.103	412.843
924.922	476.574	346.89
926.255	452.857	285.416
927.588	424.693	238.633
928.92	390.643	217.578
930.253	351.762	224.801
931.586	308.82	247.843
932.919	262.85	288.062
934.251	216.675	345.003
935.584	173.654	409.684
936.917	137.144	468.768
938.25	112.274	520.756
939.582	96.185	562.804
940.915	82.7761	594.107
942.248	72.7509	615.658
943.581	67.2556	628.193
944.913	65.9671	632.881
946.246	71.6676	630.522
947.579	84.9888	624.484
948.912	107.548	616.341
950.244	141.589	608.393
951.577	188.226	602.769
952.91	246.664	601.095
954.243	307.254	603.544
955.575	369.66	610.831
956.908	429.13	622.281
958.241	479.656	636.783
959.574	520.093	652.988
960.906	551.022	669.667
962.239	573.864	686.975
963.572	589.579	703.157
964.904	599.664	718.847
966.237	605.498	733.767
967.57	608.282	747.923
968.903	608.601	760.944
970.235	606.685	773.027
971.568	601.742	783.386
972.901	593.542	791.68
974.234	582.095	797.13
975.566	567.581	797.234
976.899	551.012	791.944
978.232	535.197	780.907
979.565	523.156	762.692
980.897	517.83	736.871
982.23	521.455	702.441
983.563	533.266	659.774
984.896	550.578	609.779
986.228	570.485	553.629
987.561	588.86	495.6
988.894	601.922	439.759
990.227	608.159	391.99
991.559	605.465	358.105
992.892	592.802	342.068
994.225	568.426	346.042
995.558	532.916	368.44
996.89	486.262	404.837
998.223	430.387	446.757
999.556	369.555	488.211
1000.89	309.915	525.626
1002.22	258.886	556.854
1003.55	223.363	580.624
1004.89	208.728	596.246
1006.22	218.446	604.509
1007.55	243.426	605.382
1008.88	285.511	599.657
1010.22	343.518	589.649
1011.55	406.646	577.541
1012.88	462.763	566.232
1014.22	511.342	558.618
1015.55	550.715	557.142
1016.88	580.533	563.815
1018.21	601.717	578.134
1019.55	615.877	597.486
1020.88	625.338	618.185
1022.21	631.811	637.227
1023.55	637.871	652.628
1024.88	644.811	664.99
1026.21	653.085	673.928
1027.54	661.849	679.349
1028.88	669.732	681.773
1030.21	675.212	682.855
1031.54	676.806	682.81
1032.87	672.177	683.421
1034.21	660.685	685.195
1035.54	640.497	688.69
1036.87	611.205	693.916
1038.21	573.414	700.497
1039.54	528.517	707.158
1040.87	479.125	714.806
1042.2	430.391	719.388
1043.54	388.086	722.186
1044.87	357.281	723.553
1046.2	342.014	725.104
1047.53	344.087	728.027
1048.87	360.294	735.638
1050.2	387.409	750.218
1051.53	422.497	774.665
1052.87	460.837	809.383
1054.2	497.792	853.559
1055.53	528.574	903.993
1056.86	547.832	956.706
1058.2	551.728	1009.13
1059.53	538.4	1059.21
1060.86	507.126	1104.65
1062.19	459.182	1141.91
1063.53	397.707	1170.5
1064.86	329.457	1188.03
1066.19	262.723	1194.18
1067.53	208.132	1187.74
1068.86	175.977	1170.14
1070.19	166.135	1140.68
1071.52	166.449	1101.76
1072.86	181.129	1056.04
1074.19	211.668	1007.04
1075.52	259.4	957.802
1076.85	324.929	913.167
1078.19	401.34	874.785
1079.52	475.661	846.167
1080.85	544.19	827.292
1082.19	605.275	818.192
1083.52	657.641	816.618
1084.85	700.43	821.155
1086.18	734.21	829.098
1087.52	759.506	837.453
1088.85	778.13	845.047
1090.18	791.588	850.373
1091.51	800.672	852.732
1092.85	807.089	850.369
1094.18	812.376	843.607
1095.51	817.512	833.362
1096.85	822.935	821.014
1098.18	828.984	807.969
1099.51	836.132	795.676
1100.84	844.328	784.009
1102.18	853.213	775.564
1103.51	863.229	770.102
1104.84	873.452	768.396
1106.18	883.28	769.723
1107.51	891.913	775.337
1108.84	897.329	783.961
1110.17	897.907	795.846
1111.51	892.616	810.552
1112.84	879.685	827.66
1114.17	857.416	845.638
1115.5	824.076	863.747
1116.84	779.399	880.761
1118.17	722.911	896.148
1119.5	654.911	909.029
1120.84	578.662	919.352
1122.17	498.229	927.446
1123.5	420.157	933.265
1124.83	353.506	936.865
1126.17	306.933	938.036
1127.5	289.441	937.046
1128.83	302.86	934.761
1130.16	336.77	931.459
1131.5	389.183	926.85
1132.83	455.05	921.787
1134.16	515.686	915.232
1135.5	565.514	906.357
1136.83	606.539	894.411
1138.16	636.801	879.234
1139.49	658.565	860.399
1140.83	672.831	840.349
1142.16	681.463	819.347
1143.49	685.953	799.418
1144.82	689.631	782.093
1146.16	695.805	770.278
1147.49	706.384	764.684
1148.82	722.502	766.427
1150.16	743.122	775.217
1151.49	767.608	791.036
1152.82	793.213	811.027
1154.15	817.129	833.729
1155.49	837.091	854.239
1156.82	851.146	870.581
1158.15	857.797	881.137
1159.48	857.387	886.312
1160.82	850.177	886.01
1162.15	837.293	882.241
1163.48	821.134	877.686
1164.82	804.011	875.17
1166.15	788.172	876.912
1167.48	775.029	885.336
1168.81	768.815	902.131
1170.15	762.548	926.4
1171.48	758.431	956.699
1172.81	754.358	989.121
1174.14	749.483	1021.17
1175.48	743.8	1049.75
1176.81	736.851	1074.94
1178.14	729.523	1093.93
1179.48	721.055	1105.17
1180.81	712.898	1108.15
1182.14	704.6	1105.78
1183.47	696.125	1098.41
1184.81	687.145	1088.7
1186.14	678.959	1077.69
1187.47	671.488	1069.59
1188.8	665.821	1066.34
1190.14	662.167	1071.56
1191.47	660.986	1085.26
1192.8	661.406	1107.44
1194.14	663.798	1136.26
1195.47	666.153	1170.89
1196.8	667.477	1208.57
1198.13	666.198	1249.04
1199.47	662.809	1289.57
1200.8	657.139	1329.11
1202.13	649.648	1364.76
1203.47	641.413	1393.82
1204.8	633.041	1414.51
1206.13	625.95	1425.75
1207.46	621.98	1426.59
1208.8	622.89	1416.38
1210.13	631.884	1398.55
1211.46	650.156	1375.03
1212.79	677.235	1348.48
1214.13	710.87	1320.76
1215.46	746.598	1293.78
1216.79	780.933	1267.38
1218.13	809.967	1242.11
1219.46	832.888	1218.56
1220.79	848.333	1198.96
1222.12	857.085	1185.26
1223.46	859.609	1180.2
1224.79	858.68	1185.05
1226.12	856.054	1200.14
1227.45	853.838	1223.26
1228.79	853.758	1251.07
1230.12	857.138	1280.4
1231.45	862.788	1309.95
1232.79	870.278	1338.73
1234.12	877.265	1368.46
1235.45	882.14	1400.18
1236.78	883.302	1434.94
1238.12	881.773	1473.03
1239.45	878.6	1513.9
1240.78	876.044	1555.27
1242.11	875.442	1594.38
1243.45	876.973	1627.84
1244.78	881.135	1655.06
1246.11	886.159	1676.06
1247.45	891.892	1691.21
1248.78	896.538	1701.27
1250.11	900.144	1706.58
1251.44	902.521	1706.59
1252.78	904.18	1698.7
1254.11	905.86	1683.45
1255.44	908.848	1659.44
1256.77	913.599	1626.53
1258.11	920.674	1584.65
1259.44	929.846	1535.41
1260.77	940.103	1480.23
1262.11	949.006	1423.64
1263.44	954.943	1369.63
1264.77	955.986	1322.82
1266.1	951.105	1287.02
1267.44	941.114	1264.53
1268.77	927.947	1253.62
1270.1	912.433	1251.67
1271.43	896.643	1252.8
1272.77	878.869	1252.38
1274.1	858.242	1248.04
1275.43	829.446	1237.98
1276.77	791.226	1221.82
1278.1	742.855	1200.92
1279.43	687.911	1178.63
1280.76	632.031	1158.13
1282.1	584.071	1141.6
1283.43	555.075	1129.28
1284.76	556.82	1120.25
1286.1	600.792	1112.22
1287.43	666.61	1103.69
1288.76	724.82	1092.78
1290.09	775.515	1079.83
1291.43	814.318	1065.01
1292.76	841.127	1050.86
1294.09	855.608	1037.93
1295.42	857.997	1028.16
1296.76	849.98	1020.6
1298.09	834.598	1014.55
1299.42	815.386	1007.59
1300.76	794.76	1001.78
1302.09	777.63	999.194
1303.42	765.194	1001.37
1304.75	761.138	1009.75
1306.09	766.324	1025.54
1307.42	782.178	1046.7
1308.75	803.622	1073.29
1310.08	826.86	1102.66
1311.42	848.094	1133.58
1312.75	866.46	1165.48
1314.08	881.12	1198.29
1315.42	894.744	1230.82
1316.75	907.687	1261.99
1318.08	922.2	1287.91
1319.41	937.852	1305.64
1320.75	951.668	1311.26
1322.08	960.827	1303.34
1323.41	963.457	1282.66
1324.74	959.068	1251.02
1326.08	948.626	1213.86
1327.41	935.372	1175.16
1328.74	921.173	1139.75
1330.08	907.376	1112.31
1331.41	893.63	1096.11
1332.74	879.954	1087.96
1334.07	863.931	1087.08
1335.41	847.116	1092.09
1336.74	829.103	1101.26
1338.07	813.135	1110.7
1339.4	800.062	1117.81
1340.74	792.604	1118.13
1342.07	791.207	1110.62
1343.4	794.62	1093.51
1344.74	799.018	1070.26
1346.07	805.084	1042.85
1347.4	812.699	1016.22
1348.73	823.707	995.366
1350.07	839.236	984.216
1351.4	859.391	982.284
1352.73	879.418	986.33
1354.06	894.484	995.797
1355.4	901.354	1010.24
1356.73	899.371	1029.98
1358.06	888.818	1054.66
1359.4	871.486	1080.85
1360.73	849.652	1106.94
1362.06	825.906	1131.62
1363.39	802.781	1153.28
1364.73	783.557	1170.42
1366.06	770.857	1183.08
1367.39	766.888	1190.07
1368.73	772.049	1190.76
1370.06	784.577	1186.26
1371.39	802.244	1176.9
1372.72	821.656	1164.11
1374.06	837.966	1148.95
1375.39	846.588	1133.77
1376.72	845.762	1122.21
1378.05	834.85	1119.94
1379.39	817.693	1132.55
1380.72	799.024	1162.4
1382.05	785.782	1203.22
1383.39	785.495	1251.01
1384.72	804.515	1300.62
1386.05	841.452	1350.26
1387.38	891.378	1398.57
1388.72	945.259	1443
1390.05	996.407	1481.08
1391.38	1043.84	1512.43
1392.71	1090.58	1535.63
1394.05	1141.13	1548.71
1395.38	1200.15	1547.26
1396.71	1271.2	1531.92
1398.05	1353.54	1503.48
1399.38	1437.88	1465.23
1400.71	1519.22	1423.24
1402.04	1593.58	1381.94
1403.38	1657.52	1345.85
1404.71	1707.87	1319.47
1406.04	1742.21	1306.68
1407.37	1760.68	1305.04
1408.71	1764.13	1310.33
1410.04	1754.11	1321.75
1411.37	1733.84	1336.59
1412.71	1705.28	1353.39
1414.04	1669.69	1367.63
1415.37	1630.41	1376.11
1416.7	1586.87	1377.25
1418.04	1540.8	1372.48
1419.37	1493.65	1364.44
1420.7	1448.31	1356.09
1422.03	1406.87	1351.06
1423.37	1371.33	1352.34
1424.7	1340.01	1359.48
1426.03	1312.68	1371.99
1427.37	1290.56	1386.19
1428.7	1273.51	1398.37
1430.03	1259.5	1408.08
1431.36	1249.47	1415.83
1432.7	1243.72	1421.46
1434.03	1243.59	1427.14
1435.36	1248.98	1436.24
1436.69	1260.53	1450.9
1438.03	1275.4	1475.61
1439.36	1289.43	1511.98
1440.69	1300.48	1559.49
1442.03	1307.66	1609.87
1443.36	1310.48	1655.82
1444.69	1307.58	1692.83
1446.02	1300.54	1718.83
1447.36	1292.36	1731.8
1448.69	1285.76	1732
1450.02	1281.85	1719.38
1451.35	1279.62	1693.96
1452.69	1276.88	1658.79
1454.02	1274.04	1616.69
1455.35	1269.7	1570.93
1456.69	1264.37	1525.42
1458.02	1259.79	1482.13
1459.35	1262.95	1440.67
1460.68	1278.73	1403.25
1462.02	1311.06	1370.83
1463.35	1359.16	1347.18
1464.68	1419.55	1334.62
1466.02	1483.82	1335.28
1467.35	1547.65	1347.43
1468.68	1607.26	1367.64
1470.01	1656.66	1391.93
1471.35	1691.63	1419.34
1472.68	1711.02	1447.76
1474.01	1714.54	1479.02
1475.34	1701.94	1515.28
1476.68	1675.66	1557.81
1478.01	1638.81	1606.29
1479.34	1595.58	1660.75
1480.68	1549.27	1719.94
1482.01	1503.04	1783.12
1483.34	1458.83	1848.97
1484.67	1422.2	1915.94
1486.01	1394	1981.95
1487.34	1373.69	2043.33
1488.67	1360.35	2098.47
1490	1347.43	2144.56
1491.34	1331.1	2179.75
1492.67	1310.68	2204.66
1494	1287.6	2219.9
1495.34	1266.68	2225.87
1496.67	1254.83	2223.33
1498	1258.01	2213.96
1499.33	1280.55	2198.92
1500.67	1323.4	2179.63
1502	1379.39	2157.28
1503.33	1434.94	2132.94
1504.66	1486.01	2108.08
1506	1526.58	2081.46
1507.33	1553.65	2052.69
1508.66	1565.3	2021.48
1510	1560.74	1987.86
1511.33	1540.48	1950.38
1512.66	1507.04	1911.11
1513.99	1460.73	1870.35
1515.33	1403.66	1829.1
1516.66	1339.48	1788.84
1517.99	1273.59	1751.1
1519.32	1212.16	1718.06
1520.66	1161.86	1693.76
1521.99	1126.52	1680.7
1523.32	1106.72	1681.96
1524.66	1105.68	1697.51
1525.99	1123.21	1726.54
1527.32	1155.05	1763.36
1528.65	1190.41	1805.66
1529.99	1217.47	1848.51
1531.32	1231.47	1889.86
1532.65	1230.89	1928.82
1533.98	1216.38	1961.5
1535.32	1191.1	1986.89
1536.65	1159.57	2002.92
1537.98	1126.9	2010.65
1539.32	1100.24	2008.7
1540.65	1085.47	1998.9
1541.98	1084.06	1979.86
1543.31	1091.08	1952.44
1544.65	1099.82	1915.97
1545.98	1108.38	1875.93
1547.31	1116.76	1835.05
1548.65	1125.64	1799.23
1549.98	1136.44	1770.77
1551.31	1148.32	1754.54
1552.64	1156.71	1749.2
1553.98	1159.32	1755.75
1555.31	1154.85	1770.98
1556.64	1142.65	1793.24
1557.97	1127.53	1818.46
1559.31	1114.38	1844.1
1560.64	1106	1867.5
1561.97	1103.95	1886.07
1563.31	1108.36	1897.11
1564.64	1116.52	1899.64
1565.97	1125.55	1892.91
1567.3	1134.07	1877.06
1568.64	1139.87	1853.55
1569.97	1142.85	1824.16
1571.3	1143.18	1792.24
1572.63	1140.9	1759.34
1573.97	1136.53	1729.65
1575.3	1130.19	1704.52
1576.63	1122.05	1684.82
1577.97	1113.42	1669.06
1579.3	1105.72	1656.54
1580.63	1098.55	1644.5
1581.96	1091.02	1633.46
1583.3	1080.77	1623.06
1584.63	1068.14	1614.85
1585.96	1054.79	1611.87
1587.29	1040.62	1616.85
1588.63	1027.99	1633.6
1589.96	1018.96	1663.46
1591.29	1014.81	1705.58
1592.63	1016.23	1753.96
1593.96	1022.96	1803.18
1595.29	1033.74	1849.22
1596.62	1048.33	1888.37
1597.96	1065.04	1919.98
1599.29	1080.62	1943.83
1600.62	1091.25	1962.08
1601.95	1093.51	1977.98
1603.29	1084.75	1993.27
1604.62	1068.06	2010.88
1605.95	1044.18	2030.59
1607.29	1017.63	2054.15
1608.62	992.425	2077.97
1609.95	973.51	2096.52
1611.28	961.797	2107.93
1612.62	953.815	2107.07
1613.95	947.273	2093.04
1615.28	941.539	2063.84
1616.61	938.126	2021.43
1617.95	938.841	1966.08
1619.28	946.585	1905.21
1620.61	961.559	1842.01
1621.95	981.818	1785.33
1623.28	1003.97	1739.05
1624.61	1023.72	1709.51
1625.94	1038.87	1692.79
1627.28	1049.82	1684.27
1628.61	1057.41	1674.6
1629.94	1062.47	1663.01
1631.27	1066.57	1644.49
1632.61	1071.25	1621.73
1633.94	1076.64	1594.17
1635.27	1084	1564.43
1636.61	1092.14	1534.51
1637.94	1101.73	1509.39
1639.27	1112.01	1492.71
1640.6	1122.71	1488.81
1641.94	1133.43	1501.7
1643.27	1145.69	1532.88
1644.6	1159.45	1582.45
1645.94	1174.55	1645.14
1647.27	1188.22	1709.76
1648.6	1199.66	1774.34
1649.93	1209.81	1836.73
1651.27	1221.29	1896.08
1652.6	1236.09	1950.03
1653.93	1255.56	2000.91
1655.26	1280.27	2052.18
1656.6	1309.68	2105.42
1657.93	1342.79	2161.37
1659.26	1378.81	2217.41
1660.6	1414.68	2269.25
1661.93	1447.45	2311.08
1663.26	1477.9	2339.53
1664.59	1506.16	2352.95
1665.93	1534.47	2346.35
1667.26	1563.88	2318.5
1668.59	1594.82	2270.96
1669.92	1625.21	2206.48
1671.26	1651.08	2128.87
1672.59	1669.7	2044.34
1673.92	1680.35	1959.46
1675.26	1681.36	1881.4
1676.59	1671.24	1814.51
1677.92	1648.93	1760.98
1679.25	1617.01	1722.36
1680.59	1578.16	1698.86
1681.92	1537.69	1685.6
1683.25	1498	1682.98
1684.58	1465.17	1689.69
1685.92	1444.2	1704.3
1687.25	1434.62	1725.85
1688.58	1439.43	1754.54
1689.92	1457.66	1789.44
1691.25	1487.31	1828.11
1692.58	1524.88	1868.64
1693.91	1563.68	1909.08
1695.25	1595.15	1948
1696.58	1614.99	1981.24
1697.91	1622.18	2010.59
1699.24	1616.92	2036.15
1700.58	1600.06	2057.19
1701.91	1577.29	2073.66
1703.24	1551.32	2086.8
1704.58	1526.77	2095.98
1705.91	1505.53	2103.17
1707.24	1489.57	2108.37
1708.57	1479.12	2111.8
1709.91	1473.5	2108.32
1711.24	1466.17	2099.12
1712.57	1453.12	2081.99
1713.9	1429.75	2057.67
1715.24	1397.14	2027.17
1716.57	1356.2	1994.31
1717.9	1312.05	1960.94
1719.24	1270.62	1929.95
1720.57	1241.27	1899.07
1721.9	1229.74	1870.02
1723.23	1240.59	1843.09
1724.57	1268.63	1817.28
1725.9	1302.01	1794.76
1727.23	1333.79	1776.34
1728.57	1360.41	1764.8
1729.9	1379.88	1761.56
1731.23	1392.32	1767.04
1732.56	1401.53	1781.34
1733.9	1409.99	1804.07
1735.23	1421.36	1829.36
1736.56	1437.41	1856.53
1737.89	1457.92	1884.02
1739.23	1482.77	1909.16
1740.56	1509.28	1929.62
1741.89	1536.53	1944.03
1743.23	1563.07	1950.99
1744.56	1587.9	1949.16
1745.89	1611.57	1939.17
1747.22	1632.06	1922.68
1748.56	1648.03	1900.4
1749.89	1656.73	1875.6
1751.22	1658.5	1850.45
1752.55	1653.65	1827.33
1753.89	1643.63	1808.88
1755.22	1629.58	1797.42
1756.55	1614.51	1794.37
1757.89	1601.41	1800.55
1759.22	1593.61	1812.57
1760.55	1593.96	1828.46
1761.88	1603.57	1846.79
1763.22	1620.76	1866.67
1764.55	1640.82	1885.5
1765.88	1659.06	1903.23
1767.21	1670.39	1919.51
1768.55	1671.4	1933.38
1769.88	1660.98	1944.46
1771.21	1642.44	1953.53
1772.55	1619.72	1960.63
1773.88	1599.49	1967
1775.21	1587.4	1974.81
1776.54	1588.16	1985.38
1777.88	1602.22	1998.57
1779.21	1625.78	2013.74
1780.54	1653.07	2031.9
1781.87	1681.71	2051.78
1783.21	1710.03	2071.74
1784.54	1734.82	2088.01
1785.87	1751.24	2100.72
1787.21	1757.35	2107.19
1788.54	1747.87	2108.67
1789.87	1721.88	2106.62
1791.2	1679.72	2103.9
1792.54	1625.5	2102.16
1793.87	1562.14	2104.64
1795.2	1495	2108.54
1796.53	1429.12	2114.12
1797.87	1372.6	2117.56
1799.2	1331.42	2118.37
1800.53	1307.69	2115.71
1801.87	1300.81	2110.8
1803.2	1304.92	2104.65
1804.53	1316.18	2101.44
1805.86	1331.24	2105.88
1807.2	1347.7	2122.21
1808.53	1365.19	2151.8
1809.86	1386.57	2191.95
1811.2	1413.95	2239.76
1812.53	1448.77	2288.83
1813.86	1486.07	2334.05
1815.19	1522.45	2371.63
1816.53	1552.04	2399.51
1817.86	1573.91	2415.2
1819.19	1585.96	2420.34
1820.52	1590.34	2411.87
1821.86	1588.33	2390.18
1823.19	1585.41	2355.54
1824.52	1580.37	2306.68
1825.86	1575.01	2243.16
1827.19	1568.14	2166.81
1828.52	1558.41	2077.16
1829.85	1541.21	1975.12
1831.19	1515.46	1863.16
1832.52	1480.82	1746.68
1833.85	1440.23	1630.51
1835.18	1396.72	1519.97
1836.52	1354.55	1421.67
1837.85	1317.26	1337.83
1839.18	1288.62	1266.81
1840.52	1273.27	1193.13
1841.85	1277.26	1110.04
1843.18	1302.81	1014.68
1844.51	1349.11	913.027
1845.85	1403.19	822.963
1847.18	1454.03	771.927
1848.51	1497.32	782.973
1849.84	1530.5	850.552
1851.18	1550.98	939.951
1852.51	1557.42	1065.36
1853.84	1552.51	1217.19
1855.18	1536.07	1384.69
1856.51	1511.3	1555.8
1857.84	1481.69	1725.25
1859.17	1447.18	1890.08
1860.51	1409.09	2047.96
1861.84	1368.79	2194.21
1863.17	1329.15	2330.01
1864.5	1293.38	2456.28
1865.84	1263.02	2573.75
1867.17	1241.92	2682.33
1868.5	1233.64	2783.83
1869.84	1237.62	2877.31
1871.17	1251.59	2964.32
1872.5	1275.75	3044.86
1873.83	1309.46	3120.29
1875.17	1350.83	3188.95
1876.5	1393.82	3251.14
1877.83	1434.21	3306.03
1879.16	1470.7	3355.9
1880.5	1502.47	3401.89
1881.83	1530.43	3444.67
1883.16	1557.26	3485.21
1884.5	1585.42	3524.1
1885.83	1615.89	3561.73
1887.16	1649.77	3597.43
1888.49	1686.77	3631.73
1889.83	1724.81	3664.07
1891.16	1761.02	3693.5
1892.49	1792.78	3719.49
1893.82	1816.36	3741.07
1895.16	1829.97	3756.25
1896.49	1830.28	3765.77
1897.82	1815.66	3769.21
1899.16	1786.76	3766.45
1900.49	1746.48	3756.35
1901.82	1697.2	3740.44
1903.15	1643.34	3718.57
1904.49	1590.33	3693.31
1905.82	1545.05	3666.53
1907.15	1509.55	3640.9
1908.49	1486.27	3619.07
1909.82	1476.2	3604.21
1911.15	1480.22	3596.72
1912.48	1494.22	3598.24
1913.82	1520.36	3605.96
1915.15	1559.14	3619.68
1916.48	1610.5	3634.42
1917.81	1675.03	3649.22
1919.15	1750.75	3658.34
1920.48	1833.34	3660.28
1921.81	1916	3650.57
1923.15	1989.6	3629.53
1924.48	2046.38	3594.61
1925.81	2082.31	3547.73
1927.14	2093.47	3491.2
1928.48	2078.62	3428.35
1929.81	2039.35	3364.14
1931.14	1979.69	3305.04
1932.47	1904.36	3257.45
1933.81	1820.71	3226.56
1935.14	1738.46	3215.1
1936.47	1668.87	3223.22
1937.81	1625.79	3247.85
1939.14	1619.98	3280.99
1940.47	1659.45	3317.16
1941.8	1723.98	3352.6
1943.14	1786.59	3385.25
1944.47	1840.94	3413.57
1945.8	1881.93	3438.39
1947.13	1906.03	3460.34
1948.47	1908.38	3482.41
1949.8	1889.91	3505.08
1951.13	1851.63	3529.28
1952.47	1795.36	3555.39
1953.8	1726.87	3582.88
1955.13	1651.96	3608.59
1956.46	1580.69	3631.22
1957.8	1520.81	3649.64
1959.13	1481.81	3663.95
1960.46	1472.07	3676.02
1961.79	1492.53	3687.16
1963.13	1533.91	3698.85
1964.46	1583.52	3711.31
1965.79	1633.85	3727.19
1967.13	1682.44	3745.94
1968.46	1723.32	3768.85
1969.79	1753.3	3795.93
1971.12	1769.41	3827.81
1972.46	1771.92	3863.67
1973.79	1761.15	3904.96
1975.12	1741.64	3950.27
1976.45	1719.06	4000.82
1977.79	1698.92	4055.09
1979.12	1686.47	4113.41
1980.45	1685.14	4174.87
1981.79	1694.59	4239.94
1983.12	1711.64	4306.93
1984.45	1730.22	4375.73
1985.78	1749.32	4445.36
1987.12	1766.97	4515.22
1988.45	1783.88	4583.71
1989.78	1800.15	4650.71
1991.12	1816.25	4715.7
1992.45	1830.74	4778.81
1993.78	1840.53	4838.52
1995.11	1843.19	4894.14
1996.45	1838.48	4946.78
1997.78	1826.14	4995.79
1999.11	1809.25	5040.41
2000.44	1789.33	5079.94
2001.78	1766.18	5113.39
2003.11	1739.87	5140.29
2004.44	1711.78	5161.13
2005.78	1683.49	5176.45
2007.11	1657.19	5185.31
2008.44	1636.39	5187.77
2009.77	1620.52	5183.81
2011.11	1605.69	5173.32
2012.44	1592.05	5155.91
2013.77	1575.23	5132.1
2015.1	1552.53	5102.57
2016.44	1525.53	5068.46
2017.77	1497.91	5030.1
2019.1	1471.45	4988.2
2020.44	1447.03	4943.64
2021.77	1427.31	4897.73
2023.1	1414.63	4851.33
2024.43	1407.54	4805.06
2025.77	1405.09	4759.79
2027.1	1410.1	4717.18
2028.43	1423.61	4678.61
2029.76	1445.35	4644.62
2031.1	1475.01	4616.05
2032.43	1511.35	4593.28
2033.76	1551.51	4575.78
2035.1	1592.96	4563.63
2036.43	1630.19	4557.71
2037.76	1659.05	4557.07
2039.09	1677.51	4562.01
2040.43	1685.88	4569.67
2041.76	1684.58	4579.37
2043.09	1675.83	4590.23
2044.42	1662.91	4602.69
2045.76	1650.97	4615.73
2047.09	1642.82	4629.85
2048.42	1641.39	4644.51
2049.76	1648.97	4655.11
2051.09	1665.81	4660.81
2052.42	1691.15	4660.45
2053.75	1723.15	4655.76
2055.09	1760.27	4646.74
2056.42	1793.99	4636.28
2057.75	1819.75	4623.61
2059.08	1836.57	4610.43
2060.42	1844.98	4597.33
2061.75	1847.99	4586.37
2063.08	1847.86	4577.54
2064.42	1847.28	4573.21
2065.75	1849.22	4571.63
2067.08	1853.25	4573.11
2068.41	1859.78	4574.87
2069.75	1866.72	4578.25
2071.08	1871.07	4581.97
2072.41	1871.23	4585.53
2073.75	1867.14	4587.17
2075.08	1858.65	4585.54
2076.41	1845.84	4580.54
2077.74	1828.98	4575.67
2079.08	1807.27	4573.22
2080.41	1779.88	4570.7
2081.74	1749.63	4566.36
2083.07	1720.55	4562.11
2084.41	1696.17	4559.71
2085.74	1679.14	4561.29
2087.07	1671.44	4559.99
2088.41	1674.44	4555.62
2089.74	1687.36	4547.75
2091.07	1711.06	4538.49
2092.4	1745.01	4528.14
2093.74	1787.65	4517.65
2095.07	1836.11	4505.01
2096.4	1885.95	4490.02
2097.73	1934.26	4473.49
2099.07	1977.61	4456.69
2100.4	2013.46	4441.37
2101.73	2040.89	4428.72
2103.07	2056.63	4419.67
2104.4	2063.86	4414.51
2105.73	2064.32	4412.5
2107.06	2061.71	4413.68
2108.4	2059.18	4416.61
2109.73	2060.32	4419.7
2111.06	2067.08	4420.77
2112.39	2080.8	4421.32
2113.73	2099.41	4418.29
2115.06	2120.7	4410.04
2116.39	2142.81	4394.9
2117.73	2164.2	4375.94
2119.06	2182.49	4352.89
2120.39	2196.64	4329.54
2121.72	2205.48	4305.67
2123.06	2210.55	4285.12
2124.39	2209.69	4263.31
2125.72	2201.64	4246.96
2127.05	2185.65	4233.23
2128.39	2159.74	4225.15
2129.72	2122.46	4219.6
2131.05	2074.14	4219.66
2132.39	2014.73	4223.16
2133.72	1945.15	4232.68
2135.05	1870.46	4244.21
2136.38	1795.4	4257.42
2137.72	1724.58	4272.66
2139.05	1660.28	4289.8
2140.38	1601.21	4307.45
2141.71	1544.24	4322.97
2143.05	1490.43	4339.03
2144.38	1445.06	4353.34
2145.71	1411.62	4366.29
2147.05	1394.32	4377.53
2148.38	1407.89	4388.26
2149.71	1440.53	4399.76
2151.04	1480.03	4413.19
2152.38	1540.75	4427.66
2153.71	1623.95	4442.15
2155.04	1723.8	4456.1
2156.37	1838.19	4468.08
2157.71	1962.95	4476.84
2159.04	2093.82	4483.02
2160.37	2226.62	4484.43
2161.71	2358.11	4480.47
2163.04	2484.74	4470.73
2164.37	2604.75	4455.83
2165.7	2717.31	4436
2167.04	2819.91	4410.36
2168.37	2910.61	4379.49
2169.7	2988.35	4343.9
2171.04	3051.94	4303.87
2172.37	3101.03	4260.3
2173.7	3136.39	4213.27
2175.03	3157.83	4163.2
2176.37	3167.12	4110.79
2177.7	3165.48	4057.99
2179.03	3153.82	4004.69
2180.36	3133.99	3951.98
2181.7	3108.31	3898.73
2183.03	3079.01	3846.62
2184.36	3047.97	3794.74
2185.7	3018.39	3743.35
2187.03	2991.48	3691.04
2188.36	2968.01	3639.21
2189.69	2948.99	3587.65
2191.03	2932.41	3538.1
2192.36	2918.98	3489.7
2193.69	2908.19	3443.25
2195.02	2899.97	3399.17
2196.36	2890.92	3359.35
2197.69	2880.04	3322.04
2199.02	2865.23	3289.39
2200.36	2846.5	3261.32
2201.69	2822.63	3237.29
2203.02	2795.5	3216.28
2204.35	2766.56	3198.44
2205.69	2738.84	3183.95
2207.02	2715.04	3172.17
2208.35	2699.73	3164.19
2209.68	2696.79	3160.26
2211.02	2708.98	3160.59
2212.35	2734.78	3165.85
2213.68	2769.58	3176.66
2215.02	2809.88	3192.96
2216.35	2852.96	3215.66
2217.68	2898.62	3243.9
2219.01	2945.04	3277.08
2220.35	2993.01	3313.12
2221.68	3039.88	3350.74
2223.01	3084.78	3386.77
2224.34	3128.3	3420.35
2225.68	3170.57	3449.71
2227.01	3210.63	3473.35
2228.34	3249.8	3488.59
2229.68	3288.72	3496.74
2231.01	3328.25	3496.59
2232.34	3367.84	3487.61
2233.67	3409.06	3469.05
2235.01	3449.8	3441.05
2236.34	3489.83	3402.03
2237.67	3527.17	3352.82
2239	3561.49	3292.17
2240.34	3589.03	3220.24
2241.67	3609.26	3138.13
2243	3621.1	3047.49
2244.34	3625	2949.99
2245.67	3622.47	2850.25
2247	3614.32	2756.22
2248.33	3600.87	2672.74
2249.67	3581.79	2604.32
2251	3557.75	2555.46
2252.33	3528.93	2527.64
2253.67	3495.95	2518.12
2255	3460.11	2524.72
2256.33	3422.34	2540.85
2257.66	3383.89	2559.94
2259	3346.19	2579.48
2260.33	3309.19	2597.29
2261.66	3275.16	2611.34
2262.99	3244.93	2620.47
2264.33	3219.26	2624.42
2265.66	3197.49	2622.78
2266.99	3180.56	2615.46
2268.33	3166.28	2604.98
2269.66	3153.99	2593.67
2270.99	3140.15	2585.77
2272.32	3123.4	2584.02
2273.66	3105.3	2593.06
2274.99	3090.02	2614.27
2276.32	3079.34	2650.07
2277.65	3075.85	2700.21
2278.99	3078.86	2761.63
2280.32	3087.42	2829.77
2281.65	3095.78	2902.46
2282.99	3098.61	2977.54
2284.32	3091.48	3052.13
2285.65	3074.47	3123.47
2286.98	3047.61	3188.82
2288.32	3008.12	3247.14
2289.65	2955.38	3296.53
2290.98	2890.02	3335.15
2292.31	2816.18	3362.26
2293.65	2739.63	3379.86
2294.98	2671.86	3387.69
2296.31	2617.04	3387.07
2297.65	2579.24	3380.31
2298.98	2557.17	3368.05
2300.31	2551.08	3349.43
2301.64	2556.89	3325.54
2302.98	2572.67	3297.91
2304.31	2594.87	3269.56
2305.64	2623.31	3244.39
2306.97	2655.49	3228.2
2308.31	2691.67	3223.02
2309.64	2731.01	3233.15
2310.97	2775.13	3261.03
2312.31	2822.93	3301.97
2313.64	2873.06	3352.08
2314.97	2919.77	3402.14
2316.3	2961.47	3444.22
2317.64	2997.58	3475.12
2318.97	3028.87	3494.4
2320.3	3055.91	3500.37
2321.63	3080.42	3494.54
2322.97	3102.69	3476.15
2324.3	3124.15	3447.21
2325.63	3144.73	3409.51
2326.97	3164.56	3364.98
2328.3	3185.56	3316.23
2329.63	3209.73	3266.01
2330.96	3239.13	3217.31
2332.3	3274.13	3173.75
2333.63	3314.47	3136.95
2334.96	3358.63	3110.93
2336.29	3405.2	3096.19
2337.63	3452.72	3093.38
2338.96	3500.34	3100.78
2340.29	3548.47	3113.3
2341.63	3598.41	3126.63
2342.96	3650.41	3135.4
2344.29	3705.52	3133.5
2345.62	3761.56	3118.03
2346.96	3817.97	3087.25
2348.29	3870.74	3039.63
2349.62	3918.38	2975.72
2350.96	3957.96	2897.65
2352.29	3988.25	2807.8
2353.62	4006.88	2713.04
2354.95	4013.95	2620.17
2356.29	4009.09	2534.82
2357.62	3993.56	2463.12
2358.95	3969.04	2413.44
2360.28	3938.54	2389.21
2361.62	3904.45	2393.17
2362.95	3870.43	2419.6
2364.28	3840.54	2461.22
2365.62	3816.42	2505.22
2366.95	3800.75	2544.35
2368.28	3793.14	2574.89
2369.61	3792.04	2593.63
2370.95	3794.36	2601.8
2372.28	3798.29	2599.8
2373.61	3800.96	2589.98
2374.94	3801.59	2574.12
2376.28	3800.82	2556.82
2377.61	3800.12	2541.24
2378.94	3798.9	2530.57
2380.28	3798.05	2527.94
2381.61	3796.3	2534.35
2382.94	3795.61	2548.49
2384.27	3796.7	2569.32
2385.61	3801.58	2594.19
2386.94	3810.05	2619.84
2388.27	3822.97	2643.57
2389.6	3840.32	2665.1
2390.94	3861.06	2684.99
2392.27	3885.29	2704.12
2393.6	3913.2	2722.51
2394.94	3944.57	2742.33
2396.27	3977.51	2763.08
2397.6	4010.75	2784.48
2398.93	4042.14	2804.97
2400.27	4069.79	2822.53
2401.6	4092.44	2835.15
2402.93	4108.94	2841.3
2404.26	4118.11	2839.14
2405.6	4120.92	2827.78
2406.93	4118.58	2808.03
2408.26	4112.86	2779.25
2409.6	4104.51	2742.48
2410.93	4095.85	2699.62
2412.26	4086.06	2653.33
2413.59	4077.16	2606.37
2414.93	4069.04	2561.05
2416.26	4061.89	2519.04
2417.59	4054.91	2480.44
2418.92	4049.17	2446.26
2420.26	4043.39	2414.31
2421.59	4037.78	2385.18
2422.92	4032.13	2356.68
2424.26	4026.8	2327.97
2425.59	4020.8	2297.04
2426.92	4014.07	2265.71
2428.25	4006.39	2233.45
2429.59	3996.9	2202.48
2430.92	3985.63	2172.06
2432.25	3972.79	2146.91
2433.59	3958.69	2127.47
2434.92	3942.75	2116.98
2436.25	3925.84	2116.05
2437.58	3907.69	2126.25
2438.92	3888.18	2148.44
2440.25	3866.67	2177.73
2441.58	3844.17	2213.55
2442.91	3820.6	2254.06
2444.25	3796.08	2296.89
2445.58	3769.85	2339.2
2446.91	3742.26	2379.94
2448.25	3713.53	2418.36
2449.58	3683.18	2454.3
2450.91	3651.88	2487.56
2452.24	3618.83	2515.64
2453.58	3585.05	2539.99
2454.91	3551.14	2559.59
2456.24	3516.48	2574.54
2457.57	3481.3	2584.1
2458.91	3446.26	2589.48
2460.24	3411.92	2590.79
2461.57	3377.66	2589.18
2462.91	3343.49	2586.45
2464.24	3309.17	2582.42
2465.57	3275.41	2579.16
2466.9	3242.74	2579.06
2468.24	3211.45	2585.54
2469.57	3181.37	2601.55
2470.9	3152.58	2629.59
2472.23	3125.56	2669.97
2473.57	3100.58	2720.05
2474.9	3077.42	2775.02
2476.23	3056.95	2825.89
2477.57	3038.95	2870.19
2478.9	3023.58	2904.62
2480.23	3010.5	2927.01
2481.56	2999.42	2935.84
2482.9	2990.17	2929.43
2484.23	2983.35	2909.53
2485.56	2979.17	2877.36
2486.89	2976.59	2836.26
2488.23	2976.4	2790.73
2489.56	2977.9	2747.55
2490.89	2981.82	2712.99
2492.23	2987.25	2693.06
2493.56	2994.64	2690.47
2494.89	3003.5	2704.27
2496.22	3012.08	2729.64
2497.56	3020.67	2764.48
2498.89	3029.8	2805.21
2500.22	3038.35	2848.97
2501.55	3045.29	2891.67
2502.89	3050.76	2931.02
2504.22	3055.2	2962.84
2505.55	3058.54	2985.63
2506.89	3062.16	2997.56
2508.22	3065.35	3000.18
2509.55	3068.92	2994.22
2510.88	3074.14	2982.15
2512.22	3081.81	2963.48
2513.55	3092.33	2941.77
2514.88	3107.11	2917.27
2516.22	3126.26	2892.84
2517.55	3149.63	2867.6
2518.88	3177.37	2843.49
2520.21	3208.6	2819.1
2521.55	3242.82	2795.3
2522.88	3279.54	2771.31
2524.21	3317	2746.28
2525.54	3353.58	2718.13
2526.88	3388	2686.4
2528.21	3418.89	2650.66
2529.54	3445.31	2613.25
2530.88	3467.09	2576.91
2532.21	3484.1	2545.98
2533.54	3497.21	2522.38
2534.87	3507.43	2507.46
2536.21	3514.78	2499.68
2537.54	3520.12	2494.95
2538.87	3524.2	2492.4
2540.2	3525.67	2489.43
2541.54	3524.88	2485.07
2542.87	3521.78	2477.77
2544.2	3516.2	2470.93
2545.54	3508.53	2467.29
2546.87	3498.76	2470.53
2548.2	3487.57	2480.16
2549.53	3475.58	2497.02
2550.87	3462.99	2521.42
2552.2	3450.16	2554.06
2553.53	3438.67	2592.82
2554.86	3428.85	2636.7
2556.2	3421.89	2683.17
2557.53	3416.98	2732.3
2558.86	3414.98	2781.38
2560.2	3415.38	2829.95
2561.53	3420.07	2877.64
2562.86	3427.41	2924.39
2564.19	3437.84	2970.72
2565.53	3451.13	3018.9
2566.86	3467.2	3070.68
2568.19	3485.15	3127.17
2569.52	3505.02	3190.34
2570.86	3527.17	3261.23
2572.19	3551.12	3341.44
2573.52	3576.15	3430.74
2574.86	3601.38	3529.23
2576.19	3626.63	3634.06
2577.52	3650.78	3744.44
2578.85	3673.85	3856.25
2580.19	3695.39	3965.98
2581.52	3715.53	4069.38
2582.85	3734.22	4163.6
2584.18	3751.1	4244.43
2585.52	3766.87	4308.91
2586.85	3781.81	4354.06
2588.18	3795.89	4376.35
2589.52	3808.45	4373.75
2590.85	3818.92	4345.74
2592.18	3828.79	4292.02
2593.51	3836.69	4213.14
2594.85	3843.56	4109.36
2596.18	3849.28	3982.2
2597.51	3854.43	3833.83
2598.84	3858.64	3669.9
2600.18	3863.07	3494.72
2601.51	3867.52	3315.07
2602.84	3872.38	3137.46
2604.18	3877.07	2969.56
2605.51	3882.2	2816.6
2606.84	3886.9	2684.24
2608.17	3890.5	2572.19
2609.51	3893.2	2472.49
2610.84	3895.68	2383.75
2612.17	3897.05	2308.59
2613.51	3897.95	2247.96
2614.84	3899.44	2203.61
2616.17	3901.79	2176.08
2617.5	3905.37	2164.97
2618.84	3911.75	2167.83
2620.17	3921.92	2177.52
2621.5	3934.74	2189.53
2622.83	3950.91	2201.37
2624.17	3968.7	2210.83
2625.5	3987.14	2215.57
2626.83	4003.66	2214.75
2628.17	4016.11	2206.99
2629.5	4020.86	2194.34
2630.83	4014.56	2179.5
2632.16	3994.31	2166.54
2633.5	3958.57	2158.57
2634.83	3905.17	2160.49
2636.16	3836.26	2174.77
2637.49	3754.88	2202.59
2638.83	3666.93	2238.5
2640.16	3576.13	2278.62
2641.49	3487.83	2318.17
2642.83	3407.37	2352.61
2644.16	3340.08	2378.53
2645.49	3288.85	2393.04
2646.82	3254.96	2393.86
2648.16	3236.5	2378.99
2649.49	3233.24	2348.25
2650.82	3242.93	2301.22
2652.15	3261.02	2240.61
2653.49	3284.18	2169.35
2654.82	3309.97	2093.63
2656.15	3337.06	2019.3
2657.49	3365.11	1956.29
2658.82	3393.15	1913
2660.15	3419.08	1898.35
[truncated: 2,504 more rows]
