# Supplementary material for: Ionogel thin films as a compatibilizing pretreatment for electrospray deposition
Source: Royal Society of Chemistry journal article supplement (doi:10.1039/d5lp00359h), 2026-01-01
Supplement: d5lp00359h1.zip [file E data - aligned.xlsx]

## Sheet: Sheet1
Lateral	Height Data	Height Data	Mean	Standard Deviation
µm	nm	nm	nm	nm
	2.1	2.2	Statistics On Rows of B"Height Data":C"Height Data"	Statistics On Rows of B"Height Data":C"Height Data"
0	1.45918	4.43004	2.94461	2.10072
1.33274	1.62894	3.64713	2.63804	1.42708
2.66548	1.3676	2.93065	2.14913	1.10524
3.99822	1.55673	2.6596	2.10817	0.779847
5.33096	1.71614	2.58604	2.15109	0.615115
6.66371	1.8373	2.43744	2.13737	0.424366
7.99645	1.91117	2.43503	2.1731	0.370428
9.32919	2.30944	2.42973	2.36958	0.085057
10.6619	2.02012	2.26525	2.14268	0.17333
11.9947	2.03141	2.16782	2.09962	0.0964598
13.3274	2.11628	2.12735	2.12182	0.00782883
14.6602	2.53072	1.88405	2.20739	0.457261
15.9929	2.13782	1.6873	1.91256	0.318568
17.3256	2.42748	1.42945	1.92847	0.705712
18.6584	2.41808	1.25672	1.8374	0.821202
19.9911	2.59407	1.44597	2.02002	0.811828
21.3239	2.57765	1.50703	2.04234	0.757041
22.6566	2.61166	1.55207	2.08187	0.74924
23.9893	2.45045	1.8231	2.13677	0.443604
25.3221	2.47813	2.182	2.33007	0.209392
26.6548	2.33337	1.84652	2.08995	0.344254
27.9876	2.64691	1.92767	2.28729	0.508578
29.3203	2.79459	1.82145	2.30802	0.688112
30.653	3.0015	1.65634	2.32892	0.951169
31.9858	2.74776	1.82568	2.28672	0.652008
33.3185	2.52194	2.09275	2.30735	0.303482
34.6513	2.59367	2.0679	2.33079	0.371773
35.984	2.59978	2.11037	2.35508	0.346065
37.3167	2.53806	2.21767	2.37786	0.226552
38.6495	2.41431	2.38231	2.39831	0.0226305
39.9822	2.49473	2.09063	2.29268	0.285745
41.315	2.41966	2.09185	2.25575	0.231798
42.6477	2.44665	2.03286	2.23975	0.292594
43.9805	2.83975	2.04849	2.44412	0.559503
45.3132	2.96863	1.89994	2.43428	0.755681
46.6459	3.05831	2.22438	2.64134	0.589679
47.9787	3.47563	2.27859	2.87711	0.846435
49.3114	3.45456	2.42048	2.93752	0.731206
50.6442	3.22065	2.51929	2.86997	0.495938
51.9769	3.28411	2.69019	2.98715	0.419964
53.3096	3.66666	2.54906	3.10786	0.79026
54.6424	3.36201	2.84519	3.1036	0.365449
55.9751	3.23721	2.58633	2.91177	0.460244
57.3079	3.44566	2.51987	2.98276	0.654635
58.6406	3.87131	2.79892	3.33512	0.758293
59.9733	3.74166	3.18119	3.46143	0.396309
61.3061	3.78378	2.89477	3.33927	0.628628
62.6388	3.62712	3.17675	3.40194	0.318459
63.9716	3.7731	3.414	3.59355	0.253922
65.3043	3.85472	3.33135	3.59304	0.370078
66.6371	3.73982	3.28944	3.51463	0.318464
67.9698	3.55775	3.41952	3.48863	0.0977445
69.3025	3.70502	3.22268	3.46385	0.341066
70.6353	3.57165	3.07478	3.32321	0.351343
71.968	3.91024	3.25066	3.58045	0.466393
73.3008	4.10104	3.1379	3.61947	0.681044
74.6335	4.37485	3.23753	3.80619	0.80421
75.9662	4.21871	3.30852	3.76361	0.643604
77.299	4.25336	3.46866	3.86101	0.554865
78.6317	4.2468	3.57972	3.91326	0.471694
79.9645	4.45579	3.873	4.16439	0.412096
81.2972	4.75791	3.57373	4.16582	0.837345
82.6299	5.01246	3.53999	4.27623	1.04119
83.9627	5.07319	3.16039	4.11679	1.35255
85.2954	4.79997	3.19762	3.9988	1.13303
86.6282	4.95163	3.05055	4.00109	1.34426
87.9609	5.04781	3.10048	4.07415	1.37697
89.2936	4.95702	2.85802	3.90752	1.48422
90.6264	5.05502	3.20632	4.13067	1.30723
91.9591	5.22196	3.02861	4.12529	1.55093
93.2919	5.19692	3.31249	4.25471	1.33249
94.6246	5.21944	3.18882	4.20413	1.43586
95.9574	5.16446	3.27122	4.21784	1.33872
97.2901	5.15815	3.4437	4.30093	1.2123
98.6228	4.82971	3.70089	4.2653	0.798197
99.9556	5.06597	3.40018	4.23308	1.17789
101.288	5.00653	3.53196	4.26925	1.04268
102.621	5.13886	3.73401	4.43644	0.993376
103.954	5.08569	3.99178	4.53873	0.773514
105.287	5.08705	3.5344	4.31072	1.09789
106.619	5.01775	3.4861	4.25192	1.08304
107.952	4.87518	3.51049	4.19284	0.96498
109.285	5.04167	3.24545	4.14356	1.27012
110.618	4.89594	3.58631	4.24112	0.92605
111.95	4.80946	3.80327	4.30637	0.711482
113.283	4.92496	4.00527	4.46511	0.650322
114.616	4.7533	3.92721	4.34025	0.584136
115.948	4.80144	4.30966	4.55555	0.347739
117.281	5.21585	4.51992	4.86788	0.492098
118.614	5.24122	4.65196	4.94659	0.416669
119.947	5.35771	4.43787	4.89779	0.650422
121.279	5.68991	4.37857	5.03424	0.927258
122.612	5.85026	3.99348	4.92187	1.31294
123.945	5.81515	4.30624	5.06069	1.06696
125.278	5.95477	4.34018	5.14748	1.14168
126.61	5.77085	4.58261	5.17673	0.840209
127.943	6.01833	4.40315	5.21074	1.1421
129.276	5.83519	4.67049	5.25284	0.823565
130.609	6.0978	4.51587	5.30683	1.1186
131.941	6.07211	4.68208	5.37709	0.982902
133.274	6.25482	4.80712	5.53097	1.02368
134.607	6.15092	4.76187	5.45639	0.98221
135.94	6.5076	4.67484	5.59122	1.29596
137.272	6.57187	4.93621	5.75404	1.15658
138.605	6.94407	5.17863	6.06135	1.24836
139.938	6.85682	5.38691	6.12186	1.03938
141.271	6.78762	5.54784	6.16773	0.876656
142.603	6.2408	5.65242	5.94661	0.416047
143.936	6.48654	5.4462	5.96637	0.735631
145.269	6.30111	5.43539	5.86825	0.612157
146.602	6.67574	5.90019	6.28796	0.5484
147.934	6.61286	6.12107	6.36696	0.34775
149.267	6.2154	6.38855	6.30198	0.122436
150.6	6.12476	6.71589	6.42032	0.41799
151.932	6.11924	7.6654	6.89232	1.0933
153.265	6.45779	9.71889	8.08834	2.30595
154.598	6.38111	14.441	10.411	5.69918
155.931	6.49549	22.6687	14.5821	11.4362
157.263	6.55331	37.5569	22.0551	21.9229
158.596	6.42617	62.1733	34.2997	39.4192
159.929	6.2456	101.068	53.6568	67.0495
161.262	6.53754	158.337	82.4371	107.338
162.594	6.69688	238.498	122.597	163.908
163.927	6.86644	343.467	175.167	238.013
165.26	7.08698	474.572	240.83	330.562
166.593	7.83099	620.189	314.01	433.003
167.925	8.41484	753.089	380.752	526.564
169.258	10.3456	867.968	439.157	606.43
170.591	13.0958	965.648	489.372	673.556
171.924	18.8587	1041	529.931	722.765
173.256	29.1323	1093.1	561.118	752.341
174.589	46.764	1121.85	584.308	760.202
175.922	74.2915	1126.5	600.397	744.026
177.255	116.696	1104.73	610.712	698.643
178.587	176.302	1057.17	616.736	622.867
179.92	257.474	986.577	622.026	515.554
181.253	360.885	896.678	628.782	378.863
182.586	484.833	795.575	640.204	219.728
183.918	604.197	693.269	648.733	62.9829
185.251	718.363	598.937	658.65	84.4463
186.584	825.224	524.905	675.065	212.357
187.916	925.017	480.268	702.642	314.486
189.249	1016.37	471.299	743.834	385.424
190.582	1096.48	492.198	794.338	427.29
191.915	1162.68	528.31	845.496	448.568
193.247	1212.32	579.831	896.074	447.234
194.58	1247.65	644.268	945.957	426.653
195.913	1268.35	714.338	991.342	391.743
197.246	1275.28	781.165	1028.22	349.39
198.578	1272.73	843.071	1057.9	303.816
199.911	1265.98	897.022	1081.5	260.892
201.244	1258.36	943.121	1100.74	222.911
202.577	1255.49	980.319	1117.91	194.578
203.909	1259.74	1008.82	1134.28	177.428
205.242	1263.81	1027.8	1145.81	166.884
206.575	1266.79	1036.84	1151.82	162.601
207.908	1272.48	1034.21	1153.34	168.477
209.24	1281.5	1021.09	1151.3	184.142
210.573	1291.93	998.89	1145.41	207.21
211.906	1303.85	969.218	1136.53	236.622
213.239	1318.76	934.222	1126.49	271.913
214.571	1335.2	894.827	1115.01	311.393
215.904	1351.46	851.432	1101.44	353.57
217.237	1367.87	804.481	1086.17	398.375
218.57	1383.49	754.969	1069.23	444.431
219.902	1395.42	700.33	1047.87	491.502
221.235	1400.45	641.949	1021.2	536.343
222.568	1398.69	581.718	990.206	577.689
223.9	1390.25	522.507	956.377	613.585
225.233	1376.86	462.184	919.522	646.774
226.566	1359.75	404.267	882.008	675.627
227.899	1342.55	352.247	847.4	700.252
229.231	1328.08	310.656	819.366	719.424
230.564	1318.31	284.165	801.236	731.25
231.897	1314.97	273.608	794.291	736.358
233.23	1318.33	272.849	795.592	739.27
234.562	1327.41	271.887	799.649	746.369
235.895	1341.15	266.743	803.948	759.722
237.228	1354.35	258.968	806.659	774.552
238.561	1363.13	251.964	807.546	785.711
239.893	1365.21	254.847	810.03	785.147
241.226	1362.11	275.557	818.831	768.306
242.559	1354.63	324.589	839.612	728.352
243.892	1344.33	412.59	878.459	658.838
245.224	1333.21	530.496	931.853	567.605
246.557	1322.12	661.191	991.655	467.347
247.89	1312.03	785.396	1048.71	372.385
249.223	1299.52	902.233	1100.88	280.926
250.555	1281.53	1011.49	1146.51	190.945
251.888	1253.58	1113.83	1183.71	98.8202
253.221	1217.77	1208.9	1213.34	6.27175
254.554	1176.25	1292.86	1234.55	82.456
255.886	1135.89	1361.97	1248.93	159.863
257.219	1101.61	1415.26	1258.44	221.781
258.552	1082.86	1450.25	1266.55	259.781
259.884	1087.29	1465.06	1276.18	267.125
261.217	1120.19	1459.35	1289.77	239.823
262.55	1170.56	1432.69	1301.63	185.351
263.883	1223.89	1387.14	1305.51	115.435
265.215	1277.39	1326.44	1301.91	34.686
266.548	1330.08	1255.07	1292.58	53.0428
267.881	1382.29	1177.51	1279.9	144.803
269.214	1433.19	1097.27	1265.23	237.53
270.546	1480.84	1018.13	1249.49	327.187
271.879	1525.45	933.15	1229.3	418.82
273.212	1564.94	834.795	1199.87	516.29
274.545	1596.77	724.315	1160.54	616.916
275.877	1619.14	608.488	1113.81	714.639
277.21	1631.83	497.92	1064.88	801.796
278.543	1635.79	405.511	1020.65	869.939
279.876	1630.95	347.864	989.409	907.281
281.208	1616.74	334.481	975.612	906.697
282.541	1592.89	348.262	970.578	880.089
283.874	1563.16	387.247	975.202	831.495
285.207	1530.71	453.685	992.195	761.569
286.539	1496.74	545.334	1021.04	672.748
287.872	1460.77	645.082	1052.92	576.776
289.205	1421.93	732.183	1077.06	487.726
290.538	1378.67	810.601	1094.64	401.685
291.87	1328.88	879.1	1103.99	318.043
293.203	1270.66	936.678	1103.67	236.16
294.536	1198.04	983.505	1090.77	151.702
295.869	1108.9	1022.11	1065.51	61.3692
297.201	1002.64	1055.55	1029.1	37.4082
298.534	883.102	1086.15	984.624	143.575
299.867	753.468	1116.03	934.748	256.369
301.199	620.589	1148.85	884.717	373.534
302.532	496.157	1182.48	839.317	485.301
303.865	390.62	1216.06	803.34	583.675
305.198	314.49	1246.59	780.538	659.091
306.53	270.88	1273.05	771.967	708.644
307.863	242.321	1291.77	767.045	742.073
309.196	227.452	1299.41	763.431	757.989
310.529	229.959	1294.47	762.213	752.721
311.861	252.341	1276.59	764.464	724.252
313.194	295.26	1246.94	771.102	672.942
314.527	359.965	1206.48	783.221	598.575
315.86	443.573	1160.78	802.178	507.145
317.192	529.299	1116.65	822.974	415.32
318.525	615.683	1077.54	846.611	326.582
319.858	702.805	1048.48	875.64	244.426
321.191	791.242	1031.78	911.509	170.083
322.523	881.165	1026.87	954.018	103.029
323.856	973.557	1026.21	999.886	37.2343
325.189	1067.85	1027.11	1047.48	28.8073
326.522	1163.19	1028.2	1095.7	95.4545
327.854	1253.88	1025.78	1139.83	161.291
329.187	1330.12	1015.47	1172.8	222.494
330.52	1390.9	994.347	1192.62	280.404
331.853	1435.65	959.205	1197.43	336.899
333.185	1463.11	905.583	1184.34	394.228
334.518	1474.66	833.031	1153.85	453.7
335.851	1473.58	742.802	1108.19	516.741
337.183	1463.2	640.046	1051.62	582.056
338.516	1445.14	530.718	987.93	646.596
339.849	1419.69	424.061	921.874	704.014
341.182	1386.21	331.681	858.944	745.663
342.514	1345.24	264.774	805.005	764.002
343.847	1295.13	229.615	762.372	753.432
345.18	1237.81	209.388	723.597	727.201
346.513	1173.71	202.374	688.042	686.839
347.845	1106.23	213.296	659.762	631.398
349.178	1038.95	243.712	641.333	562.321
350.511	977.844	294.695	636.269	483.059
351.844	929.572	367.052	648.312	397.762
353.176	896.254	458.553	677.404	309.501
354.509	874.848	545.047	709.948	233.204
355.842	870.057	620.671	745.364	176.343
357.175	881.548	685.647	783.597	138.523
358.507	907.471	743.801	825.636	115.732
359.84	939.988	799.98	869.984	99.0011
361.173	972.416	859.226	915.821	80.0371
362.506	1000.7	921.676	961.188	55.879
363.838	1022.48	983.02	1002.75	27.9017
365.171	1038.48	1041.17	1039.82	1.89646
366.504	1048.86	1095.38	1072.12	32.8932
367.837	1057.25	1145.39	1101.32	62.3252
369.169	1067.95	1192.04	1130	87.7506
370.502	1083.87	1232.91	1158.39	105.39
371.835	1109.67	1263.19	1186.43	108.557
373.167	1144.74	1280.23	1212.48	95.8042
374.5	1187.92	1282.09	1235	66.5909
375.833	1234.05	1266.68	1250.36	23.0694
377.166	1280.7	1234.87	1257.79	32.4027
378.498	1325.91	1190.75	1258.33	95.5719
379.831	1369.12	1137.35	1253.24	163.883
381.164	1411.96	1076.76	1244.36	237.024
382.497	1453.91	1014.1	1234.01	310.992
383.829	1494.39	948.69	1221.54	385.869
385.162	1534.27	874.818	1204.55	466.305
386.495	1573.64	788.026	1180.83	555.512
387.828	1610.85	690.099	1150.47	651.066
389.16	1645.92	587.217	1116.57	748.619
390.493	1677.67	491.075	1084.37	839.05
391.826	1703.58	416.3	1059.94	910.242
393.159	1719.01	376.12	1047.56	949.566
394.491	1725.33	379.396	1052.36	951.721
395.824	1721.05	415.88	1068.46	922.895
397.157	1703.79	479.279	1091.53	865.86
398.49	1675.81	564.906	1120.36	785.531
399.822	1636.35	661.859	1149.1	689.068
401.155	1587.13	758.053	1172.59	586.247
402.488	1530.21	844.416	1187.32	484.933
403.821	1468.76	919.798	1194.28	388.177
405.153	1407.91	982.937	1195.43	300.504
406.486	1350.24	1034.08	1192.16	223.559
407.819	1298.87	1077.46	1188.16	156.563
409.151	1256.39	1115.38	1185.88	99.7042
410.484	1226.93	1148.79	1187.86	55.2547
411.817	1213.58	1174.97	1194.28	27.2987
413.15	1212.77	1190.77	1201.77	15.5538
414.482	1223.64	1191.76	1207.7	22.5456
415.815	1241.53	1176.67	1209.1	45.8669
417.148	1263.38	1142.87	1203.13	85.2126
418.481	1281.13	1088.93	1185.03	135.901
419.813	1291.38	1013.08	1152.23	196.789
421.146	1290.24	917.761	1104	263.384
422.479	1278.75	806.964	1042.86	333.605
423.812	1256.71	685.224	970.965	404.098
425.144	1225.85	560.96	893.404	470.147
426.477	1190.13	444.314	817.222	527.371
427.81	1157.28	344.526	750.901	574.702
429.143	1131.98	272.246	702.112	607.923
430.475	1120.08	227.398	673.741	631.224
431.808	1122.57	188.864	655.715	660.227
433.141	1134.98	157.501	646.243	691.185
434.474	1147.73	132.279	640.007	718.036
435.806	1158.65	114.724	636.687	738.167
437.139	1167.29	105.123	636.206	751.065
438.472	1177.36	105.036	641.196	758.245
439.805	1187.93	117.58	652.755	756.851
441.137	1201.36	144.134	672.748	747.573
442.47	1219.2	187.664	703.434	729.408
443.803	1239.29	250.285	744.788	699.334
445.135	1259.76	331.049	795.403	656.695
446.468	1278.52	427.721	853.119	601.603
447.801	1296.57	515.46	906.017	552.331
449.134	1312.36	586.22	949.292	513.461
450.466	1326.73	633.808	980.271	489.973
451.799	1338.61	657.322	997.965	481.742
453.132	1348.64	655.723	1002.18	489.969
454.465	1357.94	631.809	994.876	513.455
455.797	1365.25	589.694	977.473	548.402
457.13	1367.69	537.336	952.513	587.149
458.463	1366.25	481.071	923.661	625.917
459.796	1357.08	428.916	892.996	656.308
461.128	1339.71	383.823	861.768	675.916
462.461	1312.74	331.865	822.305	693.586
463.794	1280.18	275.498	777.84	710.419
465.127	1242.25	229.646	735.948	716.019
466.459	1201.79	211.837	706.815	700.004
467.792	1163.3	225.606	694.453	663.05
469.125	1130.03	256.82	693.425	617.453
470.458	1105.27	309.661	707.465	562.58
471.79	1091.88	382.999	737.441	501.257
473.123	1087.22	474.522	780.872	433.244
474.456	1090.04	559.854	824.945	374.896
475.789	1099.82	634.266	867.044	329.198
477.121	1114.14	696.242	905.192	295.5
478.454	1133.2	743.701	938.449	275.416
479.787	1156.4	775.387	965.893	269.416
481.12	1176.84	790.878	983.857	272.913
482.452	1188.84	792.347	990.596	280.366
483.785	1191.31	782.026	986.666	289.405
485.118	1185.81	764.99	975.401	297.566
486.45	1175.83	745.497	960.666	304.295
487.783	1163.78	726.774	945.28	309.013
489.116	1158.43	705.947	932.189	319.954
490.449	1164.51	682.161	923.337	341.075
491.781	1186.81	657.387	922.101	374.361
493.114	1217.24	637.45	927.346	409.976
494.447	1255.38	630.106	942.742	442.134
495.78	1288.19	643.208	965.698	456.069
497.112	1305.23	679.439	992.336	442.503
498.445	1303.37	725.765	1014.57	408.43
499.778	1281.45	774.128	1027.79	358.732
501.111	1237.41	821.738	1029.57	293.922
502.443	1172.96	868.31	1020.64	215.421
503.776	1087.19	913.535	1000.36	122.791
505.109	983.257	957.513	970.385	18.2041
506.442	865.282	1002.24	933.761	96.8436
507.774	738.501	1048.44	893.472	219.161
509.107	611.411	1099.13	855.272	344.871
510.44	490.949	1154.73	822.84	469.365
511.773	386.963	1216.69	801.826	586.705
513.105	309.113	1284.07	796.593	689.4
514.438	260.967	1354.65	807.809	773.352
515.771	222.96	1425.44	824.197	850.279
517.104	191.861	1492.21	842.037	919.488
518.436	167.721	1551.86	859.792	978.736
519.769	149.529	1599.87	874.7	1025.55
521.102	135.964	1635.64	885.801	1060.43
522.434	126.124	1656.8	891.461	1082.35
523.767	115.257	1662.89	889.074	1094.34
525.1	102.606	1653.6	878.1	1096.72
526.433	89.2641	1631.6	860.433	1090.6
527.765	81.6417	1597.09	839.368	1071.59
529.098	87.7924	1553.95	820.869	1036.73
530.431	103.904	1504.5	804.201	990.37
531.764	133.323	1450.6	791.96	931.453
533.096	180.155	1392.33	786.243	857.138
534.429	247.296	1328.42	787.857	764.469
535.762	339.633	1253.56	796.595	646.243
537.095	457.333	1166.17	811.754	501.226
538.427	585.45	1063.73	824.592	338.198
539.76	723.057	946.791	834.924	158.203
541.093	866.531	817.251	841.891	34.8459
542.426	1008.22	682.278	845.248	230.475
543.758	1142.66	550.764	846.713	418.535
545.091	1267.81	433.131	850.469	590.206
546.424	1384.01	340.83	862.422	737.642
547.757	1488.65	284.121	886.384	851.728
549.089	1581.24	246.396	913.816	943.875
550.422	1663.62	222.905	943.265	1018.74
551.755	1735.26	214.642	974.953	1075.24
553.088	1797.79	224.669	1011.23	1112.37
554.42	1854.67	255.851	1055.26	1130.54
555.753	1905.01	308.392	1106.7	1128.98
557.086	1948.33	383.134	1165.73	1106.76
558.418	1984.58	476.31	1230.44	1066.5
559.751	2011.31	563.814	1287.56	1023.53
561.084	2026.16	639.995	1333.08	980.169
562.417	2028.17	700.853	1364.51	938.553
563.749	2019.85	749.738	1384.79	898.102
565.082	1999.87	787.768	1393.82	857.089
566.415	1969.53	816.803	1393.16	815.098
567.748	1931.64	838.195	1384.92	773.183
569.08	1893.46	851.031	1372.24	737.106
570.413	1859.68	853.777	1356.73	711.283
571.746	1836.18	842.713	1339.45	702.49
573.079	1829.16	814.414	1321.79	717.532
574.411	1838.16	765.407	1301.78	758.551
575.744	1856.55	694.787	1275.67	821.491
577.077	1874.32	605.01	1239.66	897.535
578.41	1885.53	504.658	1195.09	976.423
579.742	1887.55	404.777	1146.16	1048.48
581.075	1876.84	323.425	1100.13	1098.43
582.408	1852.23	279.827	1066.03	1111.86
583.741	1814.65	276.371	1045.51	1087.73
585.073	1764.48	293.725	1029.1	1039.98
586.406	1705.98	337.823	1021.9	967.436
587.739	1644.99	408.584	1026.79	874.269
589.072	1587.78	508.44	1048.11	763.208
590.404	1539.77	634.274	1087.02	640.285
591.737	1506.19	749.107	1127.65	535.339
593.07	1488.64	849.591	1169.12	451.879
594.402	1483.34	933.387	1208.36	388.877
595.735	1484.12	1002.96	1243.54	340.234
597.068	1489.26	1057.84	1273.55	305.058
598.401	1495.68	1104.51	1300.1	276.603
599.733	1501.16	1146.79	1323.97	250.572
601.066	1507.26	1192.96	1350.11	222.246
602.399	1516.09	1247.9	1382	189.64
603.732	1529.28	1318.67	1423.97	148.927
605.064	1551.96	1403.06	1477.51	105.289
606.397	1587.82	1494.77	1541.29	65.8
607.73	1637.29	1589.03	1613.16	34.1279
609.063	1698.34	1684.74	1691.54	9.61954
610.395	1763.58	1779.96	1771.77	11.585
611.728	1821.69	1875.19	1848.44	37.8307
613.061	1870.47	1971.23	1920.85	71.2525
614.394	1906.84	2067.15	1986.99	113.353
615.726	1929.08	2161.72	2045.4	164.506
617.059	1936.58	2252.77	2094.67	223.575
618.392	1932.41	2339.43	2135.92	287.803
619.725	1920.33	2418.84	2169.58	352.505
621.057	1902.66	2485.39	2194.02	412.055
622.39	1885.65	2540.51	2213.08	463.05
623.723	1873.44	2581.17	2227.3	500.444
625.056	1871.74	2607.92	2239.83	520.562
626.388	1885.48	2618.45	2251.96	518.291
627.721	1906.21	2610.92	2258.57	498.306
629.054	1926.85	2586.18	2256.51	466.221
630.386	1940.65	2541.77	2241.21	425.062
631.719	1944.05	2478.86	2211.45	378.167
633.052	1935.98	2398.72	2167.35	327.203
634.385	1916.86	2303.9	2110.38	273.678
635.717	1886.52	2198.75	2042.64	220.778
637.05	1846.46	2088.73	1967.6	171.313
638.383	1801.87	1979.91	1890.89	125.893
639.716	1756.68	1880.29	1818.48	87.4072
641.048	1718.24	1799.99	1759.11	57.8042
642.381	1688.34	1746.27	1717.31	40.9608
643.714	1669.82	1722.93	1696.37	37.5535
645.047	1666.78	1726.4	1696.59	42.1572
646.379	1676.14	1748.14	1712.14	50.9074
647.712	1694.78	1780.03	1737.4	60.2792
649.045	1722.36	1816.2	1769.28	66.3514
650.378	1758.27	1853.56	1805.91	67.3804
651.71	1800.28	1889.89	1845.09	63.3632
653.043	1847.16	1922.52	1884.84	53.2935
654.376	1896.91	1949.63	1923.27	37.2814
655.709	1945.53	1969.34	1957.43	16.8399
657.041	1988.43	1982.36	1985.4	4.29406
658.374	2027.05	1989.49	2008.27	26.5615
659.707	2061.56	1992.41	2026.98	48.8967
661.04	2090.08	1991.34	2040.71	69.8222
662.372	2110.54	1988.66	2049.6	86.1789
663.705	2121.14	1985.69	2053.41	95.7774
665.038	2120.4	1984.5	2052.45	96.0919
666.371	2109.57	1985.27	2047.42	87.8941
667.703	2089.74	1986.62	2038.18	72.9115
669.036	2061.02	1988.06	2024.54	51.5964
670.369	2025.34	1988.59	2006.97	25.9829
671.701	1983.28	1985.01	1984.14	1.22815
673.034	1934.13	1976.06	1955.1	29.6466
674.367	1880.34	1959.64	1919.99	56.0696
675.7	1822.21	1935.41	1878.81	80.0452
677.032	1757.47	1901.44	1829.46	101.804
678.365	1690.07	1857.97	1774.02	118.726
679.698	1624.41	1803.54	1713.98	126.666
681.031	1560.77	1739.29	1650.03	126.237
682.363	1504.92	1663.61	1584.27	112.21
683.696	1464.37	1578.78	1521.57	80.9043
685.029	1442.85	1485.11	1463.98	29.8802
686.362	1441.54	1384.28	1412.91	40.4932
687.694	1459.7	1276.6	1368.15	129.469
689.027	1494.32	1164.41	1329.37	233.285
690.36	1541.45	1051.64	1296.54	346.35
691.693	1597.32	941.967	1269.64	463.406
693.025	1656.21	842.405	1249.31	575.445
694.358	1710.8	763.455	1237.13	669.873
695.691	1758.24	717.332	1237.78	736.03
697.024	1794.64	711.291	1252.97	766.045
698.356	1817.8	745.679	1281.74	758.105
699.689	1829.77	813.217	1321.5	718.814
701.022	1830.77	900.123	1365.45	658.066
702.355	1823.71	993.798	1408.75	586.837
703.687	1808.59	1085.67	1447.13	511.18
705.02	1786.84	1170.85	1478.84	435.569
706.353	1763.73	1247.2	1505.46	365.244
707.685	1740.98	1312.15	1526.56	303.228
709.018	1721.47	1364.59	1543.03	252.358
710.351	1706.58	1403.22	1554.9	214.509
711.684	1697.5	1430.59	1564.04	188.734
713.016	1693.14	1448.54	1570.84	172.96
714.349	1695.7	1462.58	1579.14	164.842
715.682	1700.83	1476.04	1588.44	158.949
717.015	1705.14	1495.31	1600.23	148.373
718.347	1706.99	1523.57	1615.28	129.694
719.68	1706.56	1566.18	1636.37	99.2676
721.013	1703.41	1621.73	1662.57	57.7537
722.346	1698.92	1687.24	1693.08	8.25859
723.678	1693.26	1757.07	1725.17	45.1164
725.011	1689.65	1827.13	1758.39	97.2121
726.344	1689.91	1894.24	1792.07	144.482
727.677	1697.11	1956.24	1826.67	183.232
729.009	1710.83	2010.82	1860.82	212.125
730.342	1729.61	2057.44	1893.53	231.816
731.675	1752.75	2094.08	1923.42	241.356
733.008	1778.75	2119.99	1949.37	241.293
734.34	1803.38	2134.69	1969.03	234.273
735.673	1825.42	2138.28	1981.85	221.226
737.006	1843.36	2130.67	1987.02	203.154
738.339	1855.23	2112.35	1983.79	181.811
739.671	1862.93	2084.24	1973.59	156.488
741.004	1866.1	2049.4	1957.75	129.617
742.337	1864.72	2011.26	1937.99	103.621
743.669	1858.47	1972.41	1915.44	80.5695
745.002	1850.67	1936.83	1893.75	60.9306
746.335	1840.41	1908.93	1874.67	48.4503
747.668	1827.89	1892.18	1860.03	45.4578
749	1813.78	1888.61	1851.2	52.9117
750.333	1802.33	1900.83	1851.58	69.6503
751.666	1790.29	1926.71	1858.5	96.4648
752.999	1779.1	1963.57	1871.33	130.442
754.331	1768.79	2010.71	1889.75	171.062
755.664	1760.87	2066.67	1913.77	216.236
756.997	1754.57	2129.29	1941.93	264.968
758.33	1751.79	2197.86	1974.82	315.418
759.662	1753.86	2273.34	2013.6	367.326
760.995	1759.29	2355.28	2057.29	421.427
762.328	1765.64	2440.38	2103.01	477.113
763.661	1770.05	2528.28	2149.17	536.145
764.993	1771	2617.01	2194	598.217
766.326	1766.82	2702.49	2234.65	661.62
767.659	1757.03	2782.35	2269.69	725.017
768.992	1741.53	2856.38	2298.95	788.315
770.324	1721.66	2920.6	2321.13	847.778
771.657	1694.96	2972.99	2333.97	903.703
772.99	1664.72	3011.46	2338.09	952.286
774.323	1633.8	3035.26	2334.53	990.985
775.655	1606.39	3043.54	2324.96	1016.22
776.988	1586.8	3035.46	2311.13	1024.36
778.321	1580.03	3010.54	2295.28	1011.53
779.653	1586.9	2968.6	2277.75	977.009
780.986	1607.59	2909.19	2258.39	920.372
782.319	1636.77	2834.16	2235.47	846.681
783.652	1668.07	2744.74	2206.41	761.32
784.984	1694.46	2643.37	2168.91	670.982
786.317	1714.75	2532.75	2123.75	578.416
787.65	1723.44	2415.76	2069.6	489.544
788.983	1720.36	2296.78	2008.57	407.59
790.315	1706.39	2179.68	1943.03	334.664
791.648	1685.25	2069.17	1877.21	271.473
792.981	1660.97	1968.41	1814.69	217.39
794.314	1634.49	1881.12	1757.81	174.393
795.646	1611.82	1808.67	1710.25	139.191
796.979	1598.1	1751.59	1674.84	108.531
798.312	1597.24	1710.26	1653.75	79.9147
799.645	1613.64	1686.08	1649.86	51.2215
800.977	1645.13	1679.65	1662.39	24.4143
802.31	1687.47	1690.32	1688.9	2.00964
803.643	1737.79	1713.81	1725.8	16.9556
804.976	1791.32	1744.21	1767.76	33.3179
806.308	1846.12	1778.44	1812.28	47.8585
807.641	1899.77	1812.99	1856.38	61.3625
808.974	1953.11	1845.37	1899.24	76.1796
810.307	2003.07	1875.14	1939.11	90.4599
811.639	2049.95	1901.9	1975.93	104.689
812.972	2092.38	1925.17	2008.78	118.24
814.305	2132.07	1945.05	2038.56	132.245
815.637	2166.48	1959.5	2062.99	146.356
816.97	2196.46	1970.57	2083.51	159.726
818.303	2223.28	1980.32	2101.8	171.797
819.636	2245.44	1989.52	2117.48	180.959
820.968	2260.29	1999.68	2129.98	184.274
822.301	2268.48	2013.83	2141.16	180.067
823.634	2268.02	2036.1	2152.06	163.988
824.967	2258.62	2069.75	2164.18	133.552
826.299	2239.76	2115.35	2177.55	87.9703
827.632	2212.01	2175.77	2193.89	25.6305
828.965	2174.93	2252.46	2213.7	54.8186
830.298	2131.51	2342.95	2237.23	149.504
831.63	2088.01	2441.58	2264.79	250.016
832.963	2046.63	2544.18	2295.41	351.816
834.296	2013	2647.69	2330.35	448.796
835.629	1992.78	2746.99	2369.88	533.304
836.961	1986.62	2839.75	2413.19	603.256
838.294	1990.43	2923.84	2457.13	660.017
839.627	1999.66	2996.17	2497.91	704.639
840.96	2006.69	3055.75	2531.22	741.793
842.292	2010	3101.87	2555.93	772.072
843.625	2006.42	3132	2569.21	795.905
844.958	1995.98	3145.4	2570.69	812.768
846.291	1979.51	3142.17	2560.84	822.123
847.623	1956.41	3122.21	2539.31	824.349
848.956	1926.36	3085.51	2505.94	819.638
850.289	1893.1	3033.78	2463.44	806.581
851.622	1856.47	2967.16	2411.81	785.375
852.954	1820.39	2885.94	2353.16	753.457
854.287	1787.9	2792.69	2290.29	710.493
855.62	1761.81	2689.64	2225.73	656.076
856.952	1742.07	2580.6	2161.33	592.929
858.285	1730.08	2468.61	2099.35	522.22
859.618	1723.41	2359.9	2041.66	450.064
860.951	1717.03	2258.83	1987.93	383.107
862.283	1703.36	2171.92	1937.64	331.322
863.616	1682.34	2104.53	1893.43	298.534
864.949	1654.34	2059.54	1856.94	286.523
866.282	1619.07	2035.79	1827.43	294.663
867.614	1580.85	2032.55	1806.7	319.406
868.947	1542.94	2041.9	1792.42	352.816
870.28	1514.53	2058.16	1786.34	384.404
871.613	1502.12	2077.92	1790.02	407.151
872.945	1513.28	2097.84	1805.56	413.345
874.278	1551.42	2115.21	1833.31	398.661
875.611	1618.05	2128.63	1873.34	361.037
876.944	1691.08	2138.47	1914.78	316.357
878.276	1762.91	2142.82	1952.86	268.635
879.609	1826.18	2142.5	1984.34	223.675
880.942	1878.56	2139.49	2009.03	184.506
882.275	1915.99	2134.43	2025.21	154.462
883.607	1938.32	2128.04	2033.18	134.154
884.94	1942.77	2122.33	2032.55	126.972
886.273	1930.77	2120.24	2025.5	133.976
887.606	1903.08	2122.01	2012.55	154.804
888.938	1862.83	2130.07	1996.45	188.966
890.271	1812.75	2144.94	1978.84	234.895
891.604	1759.33	2166.64	1962.98	288.012
892.936	1707.83	2195.22	1951.53	344.638
894.269	1665.74	2230.83	1948.29	399.575
895.602	1639.1	2272.3	1955.7	447.744
896.935	1634.1	2317.78	1975.94	483.434
898.267	1650.14	2363.72	2006.93	504.577
899.6	1684.28	2407.53	2045.91	511.418
900.933	1731.58	2448.22	2089.9	506.747
902.266	1785.27	2486.18	2135.72	495.615
903.598	1840.48	2518.57	2179.52	479.481
904.931	1892.98	2544.27	2218.62	460.533
906.264	1943.31	2564.71	2254.01	439.397
907.597	1986.32	2579.31	2282.81	419.306
908.929	2022.88	2588	2305.44	399.603
910.262	2053.51	2592.88	2323.2	381.391
911.595	2076.95	2594.63	2335.79	366.055
912.928	2094.62	2594.54	2344.58	353.491
914.26	2110.15	2592.99	2351.57	341.414
915.593	2123.23	2592.11	2357.67	331.548
916.926	2136.84	2591.64	2364.24	321.592
918.259	2151.55	2592.64	2372.1	311.894
919.591	2168.95	2596.06	2382.5	302.016
920.924	2188.39	2602.37	2395.38	292.732
922.257	2210.28	2610.61	2410.44	283.075
923.59	2237.99	2622.24	2430.12	271.706
924.922	2270.97	2635.05	2453.01	257.441
926.255	2312.53	2648.26	2480.39	237.402
927.588	2358.54	2662.53	2510.53	214.96
928.92	2409.41	2678.26	2543.84	190.106
930.253	2463	2692.08	2577.54	161.984
931.586	2517.37	2702.67	2610.02	131.026
932.919	2569.97	2707.09	2638.53	96.9628
934.251	2619.82	2704.73	2662.28	60.0425
935.584	2666.16	2694.42	2680.29	19.9833
936.917	2705.69	2676.34	2691.02	20.7526
938.25	2737.27	2647.53	2692.4	63.4565
939.582	2761.51	2608.43	2684.97	108.242
940.915	2777.15	2558.58	2667.87	154.55
942.248	2782.18	2497.29	2639.74	201.451
943.581	2777.74	2424.43	2601.08	249.824
944.913	2764.17	2342.32	2553.25	298.29
946.246	2742.92	2253.29	2498.1	346.225
947.579	2714.74	2159.34	2437.04	392.728
948.912	2678.74	2066.17	2372.46	433.152
950.244	2637.59	1977.36	2307.47	466.853
951.577	2593.06	1898.87	2245.97	490.866
952.91	2546.11	1834.61	2190.36	503.111
954.243	2497.07	1790.98	2144.02	499.284
955.575	2449.07	1769.15	2109.11	480.775
956.908	2403.29	1768.97	2086.13	448.532
958.241	2361.82	1789.57	2075.69	404.639
959.574	2326.77	1830.8	2078.78	350.699
960.906	2299.62	1890.15	2094.89	289.536
962.239	2278.91	1965.78	2122.34	221.414
963.572	2265.91	2053.26	2159.58	150.368
964.904	2260.13	2148.73	2204.43	78.7749
966.237	2257.64	2246.57	2252.11	7.8286
967.57	2258.4	2342.49	2300.44	59.4565
968.903	2264.57	2432.03	2348.3	118.409
970.235	2277.24	2513.08	2395.16	166.766
971.568	2295.49	2581.8	2438.65	202.449
972.901	2320.19	2637.29	2478.74	224.224
974.234	2351.02	2676.99	2514.01	230.495
975.566	2387.6	2701.03	2544.32	221.626
976.899	2427.88	2706.39	2567.14	196.937
978.232	2470.73	2693.82	2582.27	157.751
979.565	2512.58	2662.35	2587.47	105.903
980.897	2553.43	2612.66	2583.04	41.8798
982.23	2590.2	2544.66	2567.43	32.2007
983.563	2622.32	2461.54	2541.93	113.683
984.896	2647.64	2366.03	2506.84	199.129
986.228	2664.7	2263.5	2464.1	283.689
987.561	2675.39	2160.56	2417.97	364.034
988.894	2679.8	2063.78	2371.79	435.59
990.227	2678	1981.1	2329.55	492.787
991.559	2671.96	1917.36	2294.66	533.585
992.892	2663.2	1878.41	2270.8	554.929
994.225	2651.51	1863.1	2257.3	557.494
995.558	2639.65	1866.89	2253.27	546.425
996.89	2627.08	1883.77	2255.43	525.598
998.223	2613.71	1910.25	2261.98	497.423
999.556	2599.69	1941.66	2270.68	465.303
1000.89	2583.92	1974.36	2279.14	431.022
1002.22	2566.82	2005.65	2286.24	396.811
1003.55	2548.75	2035.25	2292	363.093
1004.89	2528.89	2060.61	2294.75	331.119
1006.22	2508.98	2081.91	2295.44	301.986
1007.55	2487.93	2097.27	2292.6	276.236
1008.88	2466.78	2107.71	2287.24	253.9
1010.22	2443.88	2113.01	2278.45	233.962
1011.55	2421.58	2113.99	2267.78	217.501
1012.88	2399.5	2110.6	2255.05	204.288
1014.22	2378.13	2106.21	2242.17	192.278
1015.55	2358.71	2100.7	2229.71	182.437
1016.88	2341.37	2095.08	2218.23	174.153
1018.21	2327.22	2091.49	2209.35	166.685
1019.55	2316.67	2092.25	2204.46	158.692
1020.88	2310.69	2097.05	2203.87	151.068
1022.21	2309.05	2108.14	2208.59	142.065
1023.55	2313.12	2124.84	2218.98	133.131
1024.88	2321.55	2146.51	2234.03	123.771
1026.21	2334.07	2171.32	2252.7	115.079
1027.54	2350.78	2197.84	2274.31	108.141
1028.88	2369.48	2224.77	2297.12	102.323
1030.21	2384.89	2248.65	2316.77	96.3359
1031.54	2396.7	2269.49	2333.1	89.9567
1032.87	2404.28	2283.98	2344.13	85.065
1034.21	2405.27	2291.76	2348.52	80.2638
1035.54	2396.67	2290.73	2343.7	74.9075
1036.87	2377.59	2281.81	2329.7	67.7223
1038.21	2346.38	2263.66	2305.02	58.493
1039.54	2304.67	2238.41	2271.54	46.8469
1040.87	2252.51	2207.15	2229.83	32.0722
1042.2	2190.68	2174.17	2182.42	11.6727
1043.54	2121.43	2139.83	2130.63	13.0103
1044.87	2047.54	2110.9	2079.22	44.8076
1046.2	1973.43	2089.26	2031.35	81.9058
1047.53	1905.88	2080.04	1992.96	123.153
1048.87	1853.66	2084.06	1968.86	162.915
1050.2	1822.27	2100.54	1961.4	196.762
1051.53	1819.16	2126.28	1972.72	217.164
1052.87	1845.66	2160.28	2002.97	222.468
1054.2	1897.05	2199.93	2048.49	214.168
1055.53	1963.15	2244.95	2104.05	199.265
1056.86	2036.93	2294.87	2165.9	182.389
1058.2	2112.44	2349.15	2230.79	167.38
1059.53	2188.1	2405.56	2296.83	153.767
1060.86	2261.71	2462.49	2362.1	141.974
1062.19	2331.78	2519.96	2425.87	133.062
1063.53	2393.94	2576.43	2485.19	129.036
1064.86	2447.14	2629.51	2538.33	128.954
1066.19	2489.66	2677.79	2583.73	133.023
1067.53	2520.49	2720.54	2620.52	141.452
1068.86	2538.44	2756.18	2647.31	153.959
1070.19	2544.17	2784.18	2664.17	169.714
1071.52	2535.41	2803.94	2669.68	189.884
1072.86	2513.28	2815.84	2664.56	213.944
1074.19	2477.61	2819.02	2648.32	241.417
1075.52	2429.08	2815.21	2622.15	273.039
1076.85	2369.28	2804.26	2586.77	307.574
1078.19	2301.55	2788.93	2545.24	344.635
1079.52	2231.07	2768.92	2499.99	380.318
1080.85	2162.56	2746.87	2454.71	413.171
1082.19	2105.34	2721.64	2413.49	435.787
1083.52	2066.86	2695.97	2381.42	444.846
1084.85	2053.53	2668.85	2361.19	435.095
1086.18	2073.51	2640.33	2356.92	400.807
1087.52	2121.93	2609.25	2365.59	344.587
1088.85	2189.03	2575.1	2382.06	272.991
1090.18	2267.32	2536.87	2402.1	190.597
1091.51	2351.87	2494.83	2423.35	101.094
1092.85	2440.26	2449.56	2444.91	6.57208
1094.18	2529.18	2402.47	2465.83	89.5982
1095.51	2618.29	2356.08	2487.18	185.415
1096.85	2705.65	2313.18	2509.42	277.513
1098.18	2791.12	2277.78	2534.45	362.989
1099.51	2871.88	2254.96	2563.42	436.225
1100.84	2945.2	2250.87	2598.03	490.961
1102.18	3010.18	2266.91	2638.54	525.571
1103.51	3067.49	2305.76	2686.63	538.624
1104.84	3116.33	2364.64	2740.48	531.526
1106.18	3155.06	2440.04	2797.55	505.59
1107.51	3183.04	2523.89	2853.46	466.088
1108.84	3200.97	2612.26	2906.62	416.28
1110.17	3209.1	2700.62	2954.86	359.549
1111.51	3207.83	2786.95	2997.39	297.603
1112.84	3197.15	2867.67	3032.41	232.98
1114.17	3178.29	2941.77	3060.03	167.25
1115.5	3153.8	3007.72	3080.76	103.291
1116.84	3127.56	3065.12	3096.34	44.1542
1118.17	3098.48	3111.55	3105.02	9.23907
1119.5	3072.46	3148.08	3110.27	53.4736
1120.84	3048.75	3173.08	3110.92	87.917
1122.17	3035.42	3188.39	3111.91	108.17
1123.5	3029.61	3192.73	3111.17	115.342
1124.83	3032.67	3186.71	3109.69	108.924
1126.17	3043.33	3170.26	3106.79	89.754
1127.5	3059.13	3145.36	3102.24	60.9735
1128.83	3078.73	3111.55	3095.14	23.2068
1130.16	3098.56	3071.22	3084.89	19.3339
1131.5	3116.39	3026.65	3071.52	63.4553
1132.83	3129.17	2979.92	3054.54	105.535
1134.16	3136.91	2934.54	3035.72	143.097
1135.5	3133.1	2894.43	3013.76	168.764
1136.83	3115.79	2862.97	2989.38	178.767
1138.16	3087.83	2842.13	2964.98	173.735
1139.49	3049.05	2833.47	2941.26	152.439
1140.83	3002.83	2835.08	2918.96	118.614
1142.16	2955.24	2845.53	2900.38	77.5778
1143.49	2909.9	2860.45	2885.17	34.9635
1144.82	2865.32	2876.96	2871.14	8.23168
1146.16	2823.58	2890.77	2857.17	47.5109
1147.49	2787.6	2899.87	2843.73	79.3874
1148.82	2760.45	2900.99	2830.72	99.3772
1150.16	2743.4	2894.59	2819	106.907
1151.49	2739.84	2879.32	2809.58	98.6252
1152.82	2749.05	2856.94	2803	76.2899
1154.15	2771.92	2827.55	2799.73	39.3371
1155.49	2808.72	2795.04	2801.88	9.67122
1156.82	2858.88	2760.55	2809.72	69.532
1158.15	2919.41	2729.45	2824.43	134.325
1159.48	2988.77	2702.96	2845.86	202.098
1160.82	3063.28	2683.85	2873.57	268.3
1162.15	3139.49	2676.15	2907.82	327.627
1163.48	3214.39	2678.41	2946.4	378.997
1164.82	3285.7	2688.92	2987.31	421.991
1166.15	3349.83	2705.45	3027.64	455.647
1167.48	3404.81	2726.29	3065.55	479.788
1168.81	3449.72	2750.62	3100.17	494.337
1170.15	3485.2	2777.94	3131.57	500.105
1171.48	3508.97	2806.93	3157.95	496.412
1172.81	3522.23	2836.43	3179.33	484.93
1174.14	3524.91	2866.36	3195.64	465.664
1175.48	3518.53	2894.2	3206.36	441.471
1176.81	3503.34	2918.15	3210.75	413.789
1178.14	3484.48	2937.2	3210.84	386.987
1179.48	3466.03	2950.45	3208.24	364.57
1180.81	3453.36	2956.73	3205.04	351.174
1182.14	3451.15	2954.42	3202.79	351.241
1183.47	3463.33	2942.77	3203.05	368.088
1184.81	3488.17	2921.09	3204.63	400.984
1186.14	3528.1	2889.76	3208.93	451.38
1187.47	3579.59	2849.45	3214.52	516.292
1188.8	3643.53	2801.67	3222.6	595.287
1190.14	3713.3	2747.29	3230.3	683.075
1191.47	3782.52	2689.32	3235.92	773.008
1192.8	3849.24	2627.82	3238.53	863.675
1194.14	3911.03	2566.98	3239.01	950.387
1195.47	3965.57	2508.92	3237.25	1030
1196.8	4008.51	2456.77	3232.64	1097.25
1198.13	4038.88	2412.78	3225.83	1149.83
1199.47	4054.49	2381.72	3218.1	1182.83
1200.8	4053.06	2367.17	3210.12	1192.1
1202.13	4031.74	2370.04	3200.89	1175
1203.47	3988.93	2391.68	3190.3	1129.43
1204.8	3923.38	2432.98	3178.18	1053.87
1206.13	3834.87	2491.6	3163.24	949.829
1207.46	3723.24	2563.06	3143.15	820.372
1208.8	3589.74	2644.48	3117.11	668.396
1210.13	3436.06	2732.44	3084.25	497.538
1211.46	3269.36	2821.84	3045.6	316.44
1212.79	3098.66	2911.8	3005.23	132.136
1214.13	2933.16	2999.41	2966.29	46.8417
1215.46	2785.14	3080.68	2932.91	208.974
1216.79	2668.09	3153.4	2910.74	343.166
1218.13	2591.35	3216.94	2904.15	442.356
1219.46	2560	3269.04	2914.52	501.365
1220.79	2570.77	3308.16	2939.47	521.412
1222.12	2599.68	3334.93	2967.3	519.905
1223.46	2634.4	3347.03	2990.71	503.904
1224.79	2672.62	3344.62	3008.62	475.181
1226.12	2708.25	3326.63	3017.44	437.256
1227.45	2738.12	3294.71	3016.42	393.571
1228.79	2760.51	3247.27	3003.89	344.193
1230.12	2772.76	3186.3	2979.53	292.415
1231.45	2774.51	3111.95	2943.23	238.609
1232.79	2765.81	3027.22	2896.51	184.846
1234.12	2747.24	2933.09	2840.16	131.413
1235.45	2718.97	2835.72	2777.34	82.5513
1236.78	2684.28	2733.13	2708.7	34.5389
1238.12	2644.87	2632.2	2638.53	8.9571
1239.45	2604.41	2535.57	2569.99	48.6724
1240.78	2565.5	2446.8	2506.15	83.9324
1242.11	2534.16	2367.35	2450.75	117.951
1243.45	2512.14	2300.23	2406.19	149.841
1244.78	2503.86	2247.37	2375.62	181.36
1246.11	2511.44	2209.74	2360.59	213.332
1247.45	2534.86	2187.06	2360.96	245.928
1248.78	2571.29	2176.42	2373.85	279.214
1250.11	2619.99	2174.16	2397.07	315.251
1251.44	2677.51	2175.72	2426.61	354.819
1252.78	2741.82	2176.98	2459.4	399.401
1254.11	2809.49	2171.24	2490.37	451.314
1255.44	2877.47	2157.02	2517.25	509.431
1256.77	2943.29	2132.47	2537.88	573.332
1258.11	3004.74	2097.47	2551.11	641.536
1259.44	3056.94	2052.59	2554.76	710.18
1260.77	3097.08	2002.36	2549.72	774.084
1262.11	3122.88	1951.95	2537.42	827.97
1263.44	3129.68	1908.35	2519.01	863.615
1264.77	3110.83	1879.75	2495.29	870.504
1266.1	3066.65	1875.66	2471.15	842.155
1267.44	2998.81	1901	2449.91	776.271
1268.77	2910.33	1957.58	2433.95	673.7
1270.1	2797.08	2040.4	2418.74	535.055
1271.43	2663.99	2140.33	2402.16	370.286
1272.77	2517.93	2250.51	2384.22	189.092
1274.1	2365.5	2364.42	2364.96	0.766809
1275.43	2212.98	2478.97	2345.98	188.08
1276.77	2070.41	2592.9	2331.66	369.458
1278.1	1946.74	2704.71	2325.72	535.967
1279.43	1858.12	2811.52	2334.82	674.16
1280.76	1814.88	2911.95	2363.41	775.746
1282.1	1815.65	3006.51	2411.08	842.062
1283.43	1857.94	3093.26	2475.6	873.498
1284.76	1952.17	3171.27	2561.72	862.037
1286.1	2083.81	3240.99	2662.4	818.249
1287.43	2237.28	3302.95	2770.12	753.541
1288.76	2404.49	3355.53	2880.01	672.487
1290.09	2578.21	3399.2	2988.7	580.525
1291.43	2754.61	3434.7	3094.66	480.896
1292.76	2929.42	3461.22	3195.32	376.042
1294.09	3098.16	3478.87	3288.51	269.2
1295.42	3258.43	3488.54	3373.49	162.717
1296.76	3409.88	3490.08	3449.98	56.7098
1298.09	3550.65	3483.03	3516.84	47.8156
1299.42	3678.83	3467.74	3573.29	149.263
1300.76	3792.44	3444.29	3618.37	246.179
1302.09	3890.99	3412.55	3651.77	338.313
1303.42	3971.29	3374.3	3672.79	422.13
1304.75	4035.01	3329.94	3682.48	498.558
1306.09	4083.28	3281.04	3682.16	567.273
1307.42	4118.9	3230.29	3674.6	628.342
1308.75	4139.21	3181.37	3660.29	677.289
1310.08	4145.23	3138.01	3641.62	712.216
1311.42	4140.32	3104.49	3622.41	732.436
1312.75	4126.17	3085.79	3605.98	735.656
1314.08	4102.22	3085.17	3593.69	719.163
1315.42	4068.15	3103.17	3585.66	682.341
1316.75	4022.85	3137.74	3580.29	625.867
1318.08	3966.1	3185.17	3575.64	552.196
1319.41	3897.54	3242.25	3569.9	463.362
1320.75	3817.51	3304.42	3560.97	362.81
1322.08	3728.41	3367.8	3548.1	254.989
1323.41	3636.67	3430.14	3533.41	146.036
1324.74	3544.79	3488.93	3516.86	39.501
1326.08	3451.22	3543.64	3497.43	65.3441
1327.41	3357.59	3591.04	3474.31	165.07
1328.74	3266.4	3630.61	3448.5	257.531
1330.08	3178.41	3661.62	3420.01	341.685
1331.41	3096.3	3682.86	3389.58	414.757
1332.74	3022	3694.21	3358.1	475.324
1334.07	2958.1	3694.44	3326.27	520.675
1335.41	2905.26	3683.46	3294.36	550.273
1336.74	2864.07	3660.65	3262.36	563.262
1338.07	2836.25	3626.9	3231.58	559.076
1339.4	2819.29	3582.52	3200.91	539.681
1340.74	2812.72	3527.96	3170.34	505.752
1342.07	2818.19	3466.21	3142.2	458.218
1343.4	2834.31	3397.84	3116.07	398.474
1344.74	2858.96	3326.25	3092.61	330.423
1346.07	2892	3253.59	3072.8	255.687
1347.4	2933.03	3183.39	3058.21	177.032
1348.73	2981.17	3116.99	3049.08	96.0422
1350.07	3035.09	3055.95	3045.52	14.7526
1351.4	3095.26	2999.87	3047.56	67.4458
1352.73	3159.87	2948.81	3054.34	149.241
1354.06	3227.24	2902.64	3064.94	229.521
1355.4	3294.92	2860.46	3077.69	307.21
1356.73	3360.56	2819.49	3090.03	382.592
1358.06	3422.33	2779.78	3101.05	454.349
1359.4	3479.56	2740.04	3109.8	522.921
1360.73	3530.15	2701.22	3115.69	586.142
1362.06	3573.22	2662.89	3118.05	643.701
1363.39	3607.5	2626.6	3117.05	693.6
1364.73	3632.66	2593.3	3112.98	734.937
1366.06	3647.81	2562.21	3105.01	767.635
1367.39	3651.51	2532.42	3091.97	791.312
1368.73	3644.22	2503.97	3074.1	806.279
1370.06	3625.58	2476.37	3050.98	812.615
1371.39	3596.05	2446.86	3021.45	812.602
1372.72	3557.07	2413.26	2985.16	808.795
1374.06	3509.03	2372.18	2940.6	803.878
1375.39	3454.65	2322.25	2888.45	800.726
1376.72	3397.46	2262.32	2829.89	802.668
1378.05	3340.04	2192.65	2766.35	811.328
1379.39	3286.56	2114.3	2700.43	828.917
1380.72	3241.93	2031.72	2636.83	855.753
1382.05	3210.32	1949.42	2579.87	891.593
1383.39	3192.38	1874.86	2533.62	931.631
1384.72	3192.36	1815.78	2504.07	973.392
1386.05	3209.74	1781.64	2495.69	1009.82
1387.38	3244.85	1779.88	2512.37	1035.89
1388.72	3295.63	1812.58	2554.1	1048.68
1390.05	3359.2	1869.81	2614.51	1053.16
1391.38	3430.46	1934.13	2682.29	1058.07
1392.71	3506	1996.3	2751.15	1067.52
1394.05	3581.18	2053.63	2817.4	1080.14
1395.38	3653.31	2102.93	2878.12	1096.28
1396.71	3717.95	2140.67	2929.31	1115.3
1398.05	3776.63	2165.91	2971.27	1138.95
1399.38	3828.07	2177.83	3002.95	1166.9
1400.71	3873.12	2175.8	3024.46	1200.18
1402.04	3909.53	2160.6	3035.06	1236.69
1403.38	3939.03	2135.34	3037.19	1275.4
1404.71	3959.76	2102.75	3031.25	1313.1
1406.04	3971.97	2066.91	3019.44	1347.08
1407.37	3976.8	2031.46	3004.13	1375.56
1408.71	3976.37	2001.73	2989.05	1396.28
1410.04	3971.22	1982.16	2976.69	1406.48
1411.37	3962.59	1979.14	2970.86	1402.51
1412.71	3950.98	1992.56	2971.77	1384.81
1414.04	3937.22	2021.97	2979.59	1354.28
1415.37	3923.31	2063.74	2993.52	1314.91
1416.7	3908.66	2112.54	3010.6	1270.05
1418.04	3894.28	2163.22	3028.75	1224.04
1419.37	3879.51	2212.36	3045.94	1178.85
1420.7	3863.78	2256.29	3060.03	1136.67
1422.03	3844.85	2293.13	3068.99	1097.23
1423.37	3821.53	2321.15	3071.34	1060.93
1424.7	3791.47	2340.51	3065.99	1025.98
1426.03	3754.93	2350.35	3052.64	993.188
1427.37	3711.13	2352.22	3031.67	960.893
1428.7	3661.39	2346.64	3004.02	929.669
1430.03	3604.93	2336.87	2970.9	896.655
1431.36	3543.88	2324.19	2934.03	862.456
1432.7	3478.32	2311.96	2895.14	824.744
1434.03	3411.08	2303.13	2857.1	783.437
1435.36	3344.28	2298.49	2821.39	739.483
1436.69	3282.1	2299.36	2790.73	694.898
1438.03	3227.19	2305.89	2766.54	651.454
1439.36	3182.73	2316.46	2749.6	612.539
1440.69	3152.06	2329.55	2740.81	581.599
1442.03	3135	2345.24	2740.12	558.449
1443.36	3131.08	2360.68	2745.88	544.753
1444.69	3142.7	2374.63	2758.67	543.105
1446.02	3166.66	2386.55	2776.6	551.624
1447.36	3200.1	2397.75	2798.93	567.342
1448.69	3240.81	2408.16	2824.49	588.771
1450.02	3284.28	2418.73	2851.51	612.034
1451.35	3330.24	2429.64	2879.94	636.814
1452.69	3375.99	2443.29	2909.64	659.523
1454.02	3420.58	2459.96	2940.27	679.26
1455.35	3461.47	2482.12	2971.79	692.505
1456.69	3497.97	2510.11	3004.04	698.52
1458.02	3528.2	2545.14	3036.67	695.125
1459.35	3552.08	2586.13	3069.11	683.03
1460.68	3567.37	2633.24	3100.31	660.532
1462.02	3575.51	2684.86	3130.19	629.785
1463.35	3574.76	2740.1	3157.43	590.195
1464.68	3564.6	2795.96	3180.28	543.511
1466.02	3544.03	2852.8	3198.41	488.769
1467.35	3513.83	2908.7	3211.27	427.892
1468.68	3472.14	2962.8	3217.47	360.158
1470.01	3419.56	3013.26	3216.41	287.297
1471.35	3355.72	3059.79	3207.75	209.251
1472.68	3281.08	3101.35	3191.22	127.089
1474.01	3197.5	3136.77	3167.13	42.9437
1475.34	3106.76	3164.92	3135.84	41.121
1476.68	3010.91	3186.68	3098.79	124.285
1478.01	2912.99	3201.55	3057.27	204.043
1479.34	2815.46	3208.64	3012.05	278.02
1480.68	2721.46	3208.64	2965.05	344.49
1482.01	2634.46	3201.62	2918.04	401.049
1483.34	2557.85	3188.51	2873.18	445.947
1484.67	2498.88	3168.14	2833.51	473.234
1486.01	2455.51	3140.75	2798.13	484.544
1487.34	2423.79	3106.23	2765.01	482.558
1488.67	2403.85	3067.34	2735.6	469.154
1490	2403.55	3021.74	2712.64	437.125
1491.34	2423.07	2971.66	2697.36	387.911
1492.67	2461.24	2915.91	2688.57	321.501
1494	2514.98	2858.21	2686.59	242.698
1495.34	2581.45	2797.47	2689.46	152.747
1496.67	2657.86	2734.87	2696.36	54.4534
1498	2741.6	2671.09	2706.34	49.8635
1499.33	2827.34	2608.26	2717.8	154.908
1500.67	2912.78	2544.78	2728.78	260.218
1502	2996.35	2483.05	2739.7	362.954
1503.33	3075.17	2423.68	2749.42	460.677
1504.66	3146.43	2367.76	2757.09	550.604
1506	3210.07	2317.85	2763.96	630.893
1507.33	3263.69	2278.22	2770.96	696.836
1508.66	3304.89	2253.42	2779.16	743.5
1510	3333.19	2246.89	2790.04	768.125
1511.33	3349.55	2263.5	2806.52	767.954
1512.66	3356.01	2303.01	2829.51	744.58
1513.99	3351.17	2366.39	2858.78	696.345
1515.33	3337.76	2448.72	2893.24	628.642
1516.66	3314.47	2546.06	2930.26	543.351
1517.99	3282.92	2650.93	2966.93	446.885
1519.32	3244.61	2760.64	3002.62	342.214
1520.66	3201.16	2871.63	3036.39	233.012
1521.99	3155.43	2981.18	3068.3	123.216
1523.32	3110.86	3085.58	3098.22	17.8747
1524.66	3069.71	3183.8	3126.75	80.6764
1525.99	3035.36	3274.06	3154.71	168.791
1527.32	3009.87	3354.73	3182.3	243.856
1528.65	2997.18	3424.19	3210.69	301.936
1529.99	2994.18	3483.22	3238.7	345.804
1531.32	3001.56	3529.31	3265.43	373.176
1532.65	3016.43	3562.96	3289.69	386.453
1533.98	3037.17	3582.75	3309.96	385.782
1535.32	3060.85	3589.17	3325.01	373.575
1536.65	3085.66	3582.53	3334.09	351.339
1537.98	3108.83	3567.58	3338.21	324.381
1539.32	3129.98	3544.64	3337.31	293.211
1540.65	3149.07	3516.58	3332.82	259.874
1541.98	3166.05	3486.5	3326.28	226.591
1543.31	3178.93	3457.33	3318.13	196.859
1544.65	3188.64	3431.58	3310.11	171.785
1545.98	3193.35	3412.1	3302.73	154.681
1547.31	3193.2	3401.54	3297.37	147.316
1548.65	3187.77	3399.55	3293.66	149.748
1549.98	3177.29	3406.09	3291.69	161.788
1551.31	3164.64	3420.61	3292.62	180.995
1552.64	3148.65	3441.06	3294.85	206.764
1553.98	3128.8	3465.79	3297.3	238.284
1555.31	3103.71	3493.07	3298.39	275.316
1556.64	3075.01	3518.41	3296.71	313.534
1557.97	3042.69	3538.33	3290.51	350.471
1559.31	3008.13	3551.38	3279.75	384.134
1560.64	2971.84	3555.55	3263.7	412.742
1561.97	2935.65	3550.38	3243.01	434.678
1563.31	2900.65	3535.1	3217.88	448.62
1564.64	2868.81	3507.24	3188.03	451.442
1565.97	2840.87	3466.51	3153.69	442.394
1567.3	2818.27	3412.33	3115.3	420.064
1568.64	2801.27	3345.45	3073.36	384.791
1569.97	2792.75	3266.09	3029.42	334.706
1571.3	2791.7	3177.73	2984.71	272.969
1572.63	2796.68	3084.21	2940.44	203.315
1573.97	2803.62	2991.57	2897.6	132.907
1575.3	2817.32	2905.44	2861.38	62.3092
1576.63	2829.88	2836.03	2832.96	4.34939
1577.97	2837.92	2789.86	2813.89	33.9788
1579.3	2842.39	2774.62	2808.51	47.9164
1580.63	2843.2	2792.42	2817.81	35.9133
1581.96	2837.4	2840.55	2838.97	2.22524
1583.3	2825.44	2909.8	2867.62	59.6508
1584.63	2808.95	2990.79	2899.87	128.583
1585.96	2789.88	3077.7	2933.79	203.514
1587.29	2771.39	3166.46	2968.92	279.356
1588.63	2758.12	3254.35	3006.24	350.887
1589.96	2752.2	3339.01	3045.61	414.942
1591.29	2755.87	3417.56	3086.71	467.884
1592.63	2770.87	3487.63	3129.25	506.822
1593.96	2793.12	3549.87	3171.5	535.102
1595.29	2823.65	3601.51	3212.58	550.034
1596.62	2859.12	3641.7	3250.41	553.364
1597.96	2897.08	3668.7	3282.89	545.614
1599.29	2934.18	3682.47	3308.32	529.121
1600.62	2972.79	3680.67	3326.73	500.544
1601.95	3010.72	3664.09	3337.4	462.003
1603.29	3050.16	3631.56	3340.86	411.111
1604.62	3091.07	3583.03	3337.05	347.869
1605.95	3133.92	3515.56	3324.74	269.859
1607.29	3180.02	3430.14	3305.08	176.859
1608.62	3230.64	3324.13	3277.38	66.1054
1609.95	3285.83	3196.95	3241.39	62.8473
1611.28	3345.87	3046.62	3196.25	211.597
1612.62	3409.49	2872.5	3140.99	379.706
1613.95	3474.19	2674.37	3074.28	565.558
1615.28	3535.97	2453.8	2994.88	765.21
1616.61	3600.15	2212.53	2906.34	981.194
1617.95	3658.83	1953.88	2806.35	1205.58
1619.28	3712.04	1684.81	2698.42	1433.47
1620.61	3756.63	1415.07	2585.85	1655.73
1621.95	3791.13	1156.33	2473.73	1863.08
1623.28	3814.23	922.555	2368.39	2044.73
1624.61	3824.53	731.045	2277.79	2187.42
1625.94	3820.49	596.717	2208.6	2279.55
1627.28	3801.99	515.787	2158.89	2323.69
1628.61	3769.49	461.098	2115.3	2339.39
1629.94	3719.7	438.589	2079.14	2320.1
1631.27	3655.09	452.511	2053.8	2264.56
1632.61	3577.21	511.298	2044.25	2167.93
1633.94	3488.82	619.779	2054.3	2028.72
1635.27	3393.8	781.966	2087.88	1846.84
1636.61	3298.34	1000.05	2149.2	1625.13
1637.94	3206.93	1243.01	2224.97	1388.7
1639.27	3127.36	1489.97	2308.66	1157.8
1640.6	3065.59	1737.13	2401.36	939.362
1641.94	3025.89	1982.13	2504.01	738.047
1643.27	3007.68	2225.2	2616.44	553.298
1644.6	3009.76	2461.78	2735.77	387.476
1645.94	3023.92	2693.26	2858.59	233.812
1647.27	3045.42	2920.3	2982.86	88.4751
1648.6	3068.27	3144.19	3106.23	53.688
1649.93	3087.36	3363.92	3225.64	195.554
1651.27	3100.75	3580.61	3340.68	339.313
1652.6	3105.78	3794.29	3450.04	486.849
1653.93	3103.79	4004.14	3553.97	636.647
1655.26	3090.19	4206.75	3648.47	789.525
1656.6	3064.76	4402.52	3733.64	945.942
1657.93	3027.79	4589.54	3808.67	1104.32
1659.26	2978.6	4766.29	3872.44	1264.08
1660.6	2917.15	4931.6	3924.37	1424.43
1661.93	2845.15	5085.09	3965.12	1583.88
1663.26	2765.03	5225.58	3995.3	1739.87
1664.59	2680.01	5350.72	4015.36	1888.47
1665.93	2594.25	5460.43	4027.34	2026.69
1667.26	2513.31	5555.7	4034.5	2151.3
1668.59	2441.9	5635.61	4038.76	2258.29
1669.92	2387.15	5698.15	4042.65	2341.23
1671.26	2353.89	5745.55	4049.72	2398.27
1672.59	2346.1	5777.43	4061.77	2426.31
1673.92	2366.26	5793.86	4080.06	2423.68
1675.26	2413.73	5793.49	4103.61	2389.85
1676.59	2482.98	5777.17	4130.08	2329.34
1677.92	2571.26	5743.87	4157.57	2243.38
1679.25	2673.16	5693	4183.08	2135.35
1680.59	2784.63	5624.94	4204.79	2008.4
1681.92	2902.41	5539.58	4220.99	1864.76
1683.25	3024.28	5436.32	4230.3	1705.57
1684.58	3147.9	5315.13	4231.51	1532.47
1685.92	3272.29	5176.37	4224.33	1346.39
1687.25	3396.86	5016.93	4206.89	1145.56
1688.58	3520.21	4836.93	4178.57	931.064
1689.92	3640.81	4638.02	4139.41	705.13
1691.25	3757.61	4419.26	4088.43	467.861
1692.58	3869.26	4181.1	4025.18	220.504
1693.91	3974.27	3927.7	3950.99	32.928
1695.25	4070.77	3660.12	3865.45	290.373
1696.58	4160.33	3382.64	3771.48	549.91
1697.91	4241.16	3102.83	3672	804.916
1699.24	4312.15	2831.1	3571.63	1047.26
1700.58	4373.18	2577.06	3475.12	1270.05
1701.91	4423.94	2353.45	3388.7	1464.06
1703.24	4462.36	2175.38	3318.87	1617.14
1704.58	4488.21	2055.7	3271.96	1720.05
1705.91	4501.86	2001.15	3251.51	1768.27
1707.24	4501.94	2008.38	3255.16	1763.21
1708.57	4488.94	2058.59	3273.77	1718.51
1709.91	4463.91	2135.49	3299.7	1646.44
1711.24	4427.53	2232.42	3329.97	1552.18
1712.57	4379.18	2345.85	3362.52	1437.78
1713.9	4320.95	2470.25	3395.6	1308.65
1715.24	4254.5	2603.3	3428.9	1167.58
1716.57	4182.91	2740.92	3461.92	1019.64
1717.9	4108.53	2879.94	3494.23	868.745
1719.24	4034.96	3016.42	3525.69	720.213
1720.57	3965.34	3149.94	3557.64	576.571
1721.9	3904.18	3276.2	3590.19	444.049
1723.23	3853.53	3392.86	3623.19	325.745
1724.57	3814.75	3498.43	3656.59	223.672
1725.9	3790.62	3592.63	3691.62	139.999
1727.23	3780.73	3675.35	3728.04	74.5141
1728.57	3783.4	3745.02	3764.21	27.1406
1729.9	3797.25	3802.42	3799.83	3.65733
1731.23	3819.76	3847.76	3833.76	19.8001
1732.56	3848.26	3880.98	3864.62	23.1341
1733.9	3879.7	3902.85	3891.27	16.3727
1735.23	3912.8	3913.1	3912.95	0.210932
1736.56	3945.56	3912.9	3929.23	23.0914
1737.89	3975.52	3903.41	3939.47	50.987
1739.23	4002.08	3884.71	3943.39	82.993
1740.56	4025.58	3858.75	3942.17	117.962
1741.89	4044.8	3825.29	3935.05	155.219
1743.23	4059.16	3786.01	3922.59	193.147
1744.56	4069.36	3740.71	3905.04	232.389
1745.89	4074.99	3691.48	3883.24	271.187
1747.22	4076.75	3637.91	3857.33	310.308
1748.56	4074.08	3581.94	3828.01	347.996
1749.89	4066.31	3522.3	3794.3	384.674
1751.22	4051.73	3459.59	3755.66	418.706
1752.55	4034.14	3393.54	3713.84	452.972
1753.89	4018.32	3324.94	3671.63	490.293
1755.22	4001.27	3253.53	3627.4	528.734
1756.55	3983.92	3179.94	3581.93	568.501
1757.89	3965.71	3104.34	3535.03	609.082
1759.22	3948.06	3027.37	3487.72	651.031
1760.55	3930.87	2949.24	3440.05	694.117
1761.88	3914.67	2872.89	3393.78	736.646
1763.22	3899.13	2800.09	3349.61	777.137
1764.55	3883.72	2732.48	3308.1	814.048
1765.88	3868.63	2673.65	3271.14	844.98
1767.21	3853.22	2626.61	3239.91	867.347
1768.55	3835.88	2594.2	3215.04	878.007
1769.88	3815.6	2578.52	3197.06	874.75
1771.21	3792.64	2581.31	3186.98	856.533
1772.55	3766.21	2601.37	3183.79	823.671
1773.88	3734.85	2635.78	3185.32	777.166
1775.21	3699.46	2682.15	3190.8	719.353
1776.54	3658.9	2735.48	3197.19	652.954
1777.88	3612.46	2788.65	3200.56	582.523
1779.21	3560.07	2837.65	3198.86	510.828
1780.54	3503.5	2879.03	3191.26	441.567
1781.87	3443.89	2909.42	3176.65	377.923
1783.21	3382.17	2928.06	3155.12	321.108
1784.54	3321.03	2933.32	3127.18	274.154
1785.87	3261.67	2924.84	3093.26	238.177
1787.21	3209.83	2901.88	3055.85	217.758
1788.54	3170.34	2866.44	3018.39	214.892
1789.87	3148.71	2820.27	2984.49	232.244
1791.2	3150.76	2764.89	2957.82	272.849
1792.54	3181.35	2703.99	2942.67	337.545
1793.87	3241.15	2639.78	2940.47	425.227
1795.2	3329.47	2578.38	2953.93	531.1
1796.53	3441.28	2520.16	2980.72	651.328
1797.87	3575.09	2469.5	3022.3	781.772
1799.2	3726.55	2424.01	3075.28	921.034
1800.53	3887.51	2386.34	3136.92	1061.49
1801.87	4050.64	2357.75	3204.2	1197.05
1803.2	4214.44	2339.14	3276.79	1326.04
1804.53	4376.04	2332.47	3354.25	1445.02
1805.86	4530.29	2340.87	3435.58	1548.15
1807.2	4674.73	2362.84	3518.78	1634.75
1808.53	4807.83	2396.84	3602.34	1704.83
1809.86	4929.32	2436.34	3682.83	1762.8
1811.2	5037.12	2476.9	3757.01	1810.35
1812.53	5131.82	2513.4	3822.61	1851.5
1813.86	5213.41	2544.57	3878.99	1887.16
1815.19	5280.78	2569.84	3925.31	1916.93
1816.53	5333.37	2590.35	3961.86	1939.61
1817.86	5371.48	2609.03	3990.26	1953.35
1819.19	5394.07	2630.86	4012.46	1953.88
1820.52	5401.24	2661.47	4031.36	1937.31
1821.86	5393.05	2706.64	4049.84	1899.58
1823.19	5369.44	2772.74	4071.09	1836.14
1824.52	5329.14	2863.67	4096.41	1743.35
1825.86	5273.6	2979.94	4126.77	1621.86
1827.19	5201.84	3117.23	4159.54	1474.05
1828.52	5115.39	3268.81	4192.1	1305.73
1829.85	5013.91	3424.77	4219.34	1123.69
1831.19	4900.47	3579.07	4239.77	934.37
1832.52	4775.46	3729.36	4252.41	739.704
1833.85	4642.78	3872.37	4257.58	544.767
1835.18	4506.37	4004.52	4255.45	354.863
1836.52	4370.36	4124.17	4247.27	174.086
1837.85	4238.67	4229.57	4234.12	6.43579
1839.18	4115.49	4319.92	4217.71	144.557
1840.52	4006.27	4393.43	4199.85	273.762
1841.85	3912.75	4450.38	4181.57	380.161
1843.18	3834.3	4490.65	4162.48	464.111
1844.51	3770.35	4514.89	4142.62	526.47
1845.85	3718.69	4523.91	4121.3	569.38
1847.18	3675.81	4518.32	4097.06	595.742
1848.51	3640.35	4499.49	4069.92	607.502
1849.84	3609.68	4469.11	4039.4	607.708
1851.18	3583.29	4428.87	4006.08	597.919
1852.51	3562.38	4380.76	3971.57	578.683
1853.84	3548.91	4327.22	3938.06	550.344
1855.18	3543.19	4269.26	3906.22	513.409
1856.51	3546.14	4207.06	3876.6	467.345
1857.84	3556.66	4142.13	3849.4	413.991
1859.17	3574.29	4074.51	3824.4	353.711
1860.51	3596.99	4003.98	3800.49	287.781
1861.84	3625.01	3929.66	3777.34	215.419
1863.17	3656.76	3850.99	3753.87	137.342
1864.5	3690.48	3765.49	3727.99	53.0461
1865.84	3725.11	3672.04	3698.58	37.5297
1867.17	3760.7	3569.18	3664.94	135.426
1868.5	3797.65	3456.18	3626.91	241.46
1869.84	3835.38	3333.22	3584.3	355.076
1871.17	3874.09	3202.03	3538.06	475.212
1872.5	3914.06	3065.45	3489.75	600.063
1873.83	3954.99	2928.27	3441.63	726.003
1875.17	3996.17	2796.9	3396.53	848.013
1876.5	4037.39	2677.79	3357.59	961.387
1877.83	4079.38	2579.24	3329.31	1060.76
1879.16	4121.83	2509.27	3315.55	1140.25
1880.5	4164.48	2472.98	3318.73	1196.07
1881.83	4207.71	2470.77	3339.24	1228.2
1883.16	4250.31	2502.66	3376.49	1235.77
1884.5	4290.19	2563.67	3426.93	1220.83
1885.83	4328.64	2651.18	3489.91	1186.14
1887.16	4363.57	2764.38	3563.97	1130.79
1888.49	4393	2899.66	3646.33	1055.95
1889.83	4414.86	3051.33	3733.1	964.161
1891.16	4428.15	3216.75	3822.45	856.588
1892.49	4431.15	3390.73	3910.94	735.69
1893.82	4420.87	3568.17	3994.52	602.95
1895.16	4395.53	3745.86	4070.7	459.388
1896.49	4353.53	3922.49	4138.01	304.792
1897.82	4291.45	4094.51	4192.98	139.258
1899.16	4204.88	4259.06	4231.97	38.3178
1900.49	4091.35	4415.27	4253.31	229.041
1901.82	3948.3	4561.09	4254.69	433.311
1903.15	3776.2	4693.98	4235.09	648.965
1904.49	3570.96	4813.77	4192.36	878.799
1905.82	3336.38	4920.26	4128.32	1119.97
1907.15	3074.34	5011.76	4043.05	1369.97
1908.49	2794.2	5087.44	3940.82	1621.57
1909.82	2506.34	5147.85	3827.09	1867.83
1911.15	2227.4	5192.85	3710.13	2096.89
1912.48	1978.03	5222.32	3600.17	2294.06
1913.82	1782.11	5235.1	3508.6	2441.63
1915.15	1658.95	5229.66	3444.31	2524.87
1916.48	1622.31	5205.59	3413.95	2533.76
1917.81	1656.61	5161.85	3409.23	2478.58
1919.15	1743.72	5099.15	3421.44	2372.65
1920.48	1873.62	5014.53	3444.07	2220.96
1921.81	2031.57	4907.89	3469.73	2033.87
1923.15	2202.3	4777.3	3489.8	1820.8
1924.48	2381.45	4622.3	3501.88	1584.52
1925.81	2564.81	4440.7	3502.76	1326.46
1927.14	2748.25	4233.2	3490.72	1050.02
1928.48	2927.14	3998.95	3463.05	757.882
1929.81	3099.62	3737.95	3418.78	451.367
1931.14	3264.55	3450.07	3357.31	131.178
1932.47	3416.67	3139.55	3278.11	195.955
1933.81	3554.63	2807.94	3181.28	527.991
1935.14	3679.15	2461.45	3070.3	861.04
1936.47	3789.57	2107.62	2948.6	1189.32
1937.81	3883.08	1760.54	2821.81	1500.87
1939.14	3960.46	1433.11	2696.79	1787.1
1940.47	4022.06	1140.65	2581.36	2037.47
1941.8	4067.64	900.473	2484.06	2239.52
1943.14	4097.14	728.237	2412.69	2382.18
1944.47	4111.7	609.679	2360.69	2476.3
1945.8	4111.62	509.779	2310.7	2546.89
1947.13	4098.6	432.19	2265.39	2592.54
1948.47	4072.74	376.159	2224.45	2613.88
1949.8	4037.2	344.388	2190.8	2611.21
1951.13	3992.35	342.363	2167.35	2580.93
1952.47	3944.01	372.923	2158.46	2525.14
1953.8	3893.84	443.57	2168.7	2439.71
1955.13	3845.66	559.332	2202.5	2323.78
1956.46	3801.86	723.337	2262.6	2176.85
1957.8	3763.02	937.669	2350.35	1997.83
1959.13	3731.51	1170.95	2451.23	1810.59
1960.46	3708.61	1398.37	2553.49	1633.59
1961.79	3694.23	1617.49	2655.86	1468.48
1963.13	3685.39	1825.43	2755.41	1315.19
1964.46	3682.54	2022.3	2852.42	1173.97
1965.79	3683.57	2207.93	2945.75	1043.44
1967.13	3686.36	2380.59	3033.47	923.318
1968.46	3689.68	2542.27	3115.98	811.342
1969.79	3694.76	2693.64	3194.2	707.898
1971.12	3700.95	2835.8	3268.37	611.756
1972.46	3712.2	2968.08	3340.14	526.174
1973.79	3729.86	3090.99	3410.42	451.746
1975.12	3754.04	3202.43	3478.23	390.046
1976.45	3782.82	3301.08	3541.95	340.641
1977.79	3816.43	3385.14	3600.79	304.969
1979.12	3852.78	3455.02	3653.9	281.258
1980.45	3893.12	3509.12	3701.12	271.525
1981.79	3932.72	3545.37	3739.05	273.898
1983.12	3971.12	3563.49	3767.3	288.236
1984.45	4006.83	3563.94	3785.38	313.174
1985.78	4038.8	3546.14	3792.47	348.368
1987.12	4066.12	3511.01	3788.56	392.519
1988.45	4087.82	3460.47	3774.14	443.607
1989.78	4102.88	3395.96	3749.42	499.867
1991.12	4112.72	3321.8	3717.26	559.267
1992.45	4117.67	3243.34	3680.5	618.25
1993.78	4117.52	3165.09	3641.31	673.469
1995.11	4113.01	3093.48	3603.25	720.915
1996.45	4103.66	3036.53	3570.09	754.575
1997.78	4088.28	2997.91	3543.1	771.005
1999.11	4068.12	2981.22	3524.67	768.559
2000.44	4044.38	2987.33	3515.85	747.443
2001.78	4015.28	3015.32	3515.3	707.079
2003.11	3979.71	3060.06	3519.88	650.294
2004.44	3932.94	3118.46	3525.7	575.924
2005.78	3877.54	3183.48	3530.51	490.774
2007.11	3816.07	3252.77	3534.42	398.31
2008.44	3750.85	3322.26	3536.55	303.062
2009.77	3676.22	3389.67	3532.95	202.617
2011.11	3591.03	3450.04	3520.54	99.6971
2012.44	3495.95	3504.08	3500.02	5.75267
2013.77	3392.28	3549.3	3470.79	111.03
2015.1	3280.32	3585.52	3432.92	215.805
2016.44	3164.28	3610.19	3387.24	315.305
2017.77	3046.26	3624.79	3335.52	409.086
2019.1	2931.48	3628.39	3279.93	492.79
2020.44	2824.68	3621.03	3222.85	563.104
2021.77	2732.35	3603.2	3167.78	615.785
2023.1	2655.97	3575.34	3115.66	650.094
2024.43	2594.62	3538.36	3066.49	667.321
2025.77	2541.61	3494.06	3017.83	673.487
2027.1	2494.74	3442.85	2968.79	670.415
2028.43	2449.2	3387.36	2918.28	663.379
2029.76	2402.46	3329.99	2866.22	655.862
2031.1	2352.99	3273.62	2813.31	650.982
2032.43	2300.51	3220.74	2760.62	650.702
2033.76	2247.71	3175.33	2711.52	655.931
2035.1	2198.49	3141.35	2669.92	666.708
2036.43	2157.7	3121.22	2639.46	681.317
2037.76	2130.71	3117.31	2624.01	697.634
2039.09	2123.08	3129.44	2626.26	711.603
2040.43	2136.59	3156.04	2646.32	720.863
2041.76	2169.18	3191.63	2680.4	722.986
2043.09	2222.78	3232.75	2727.77	714.158
2044.42	2294.05	3275.14	2784.59	693.733
2045.76	2378.11	3314.19	2846.15	661.903
2047.09	2473.76	3346.15	2909.95	616.869
2048.42	2578.25	3369.83	2974.04	559.726
2049.76	2689.84	3381.48	3035.66	489.065
2051.09	2806.5	3381.23	3093.87	406.394
2052.42	2929.35	3369.13	3149.24	310.974
2053.75	3055.27	3345.74	3200.51	205.391
2055.09	3183.77	3311.75	3247.76	90.4952
2056.42	3313.07	3270.4	3291.73	30.1742
2057.75	3441.75	3225.47	3333.61	152.932
2059.08	3567.37	3180.4	3373.89	273.629
2060.42	3689.4	3137.98	3413.69	389.912
2061.75	3805.92	3101.83	3453.88	497.867
2063.08	3917.66	3072.16	3494.91	597.855
2064.42	4020.5	3046.05	3533.28	689.036
2065.75	4116.39	3019.88	3568.14	775.351
2067.08	4205.25	2989.1	3597.18	859.95
2068.41	4287.09	2948.68	3617.88	946.398
2069.75	4359.57	2893.57	3626.57	1036.62
2071.08	4422.23	2820.63	3621.43	1132.51
2072.41	4477.17	2725.58	3601.37	1238.56
2073.75	4526.66	2605.86	3566.26	1358.21
2075.08	4568.79	2460.28	3514.54	1490.94
2076.41	4601.67	2288.73	3445.2	1635.5
2077.74	4625.81	2092.99	3359.4	1790.98
2079.08	4641.08	1879.11	3260.1	1953.01
2080.41	4648.91	1657.47	3153.19	2115.27
2081.74	4645.75	1442.26	3044.01	2265.21
2083.07	4632.72	1252.84	2942.78	2389.93
2084.41	4608.26	1113.72	2860.99	2471.01
2085.74	4573.44	1044.54	2808.99	2495.31
2087.07	4527.68	1062.95	2795.32	2449.94
2088.41	4473.07	1151.82	2812.44	2348.47
2089.74	4409.15	1258.88	2834.01	2227.58
2091.07	4336.2	1381.23	2858.71	2089.48
2092.4	4251.9	1516.93	2884.42	1933.92
2093.74	4155.56	1660.07	2907.81	1764.58
2095.07	4045.92	1807.13	2926.52	1583.06
2096.4	3924.22	1954.77	2939.5	1392.61
2097.73	3796.85	2098.97	2947.91	1200.58
2099.07	3666.33	2234.78	2950.56	1012.26
2100.4	3531.82	2360.97	2946.39	827.912
2101.73	3394.55	2475.17	2934.86	650.099
2103.07	3260.64	2573.69	2917.17	485.747
2104.4	3132.39	2655.41	2893.9	337.278
2105.73	3013.38	2718.66	2866.02	208.401
2107.06	2907.13	2760.85	2833.99	103.435
2108.4	2820.41	2779.64	2800.03	28.8291
2109.73	2756.41	2775.9	2766.15	13.7817
2111.06	2717.43	2748.78	2733.1	22.1655
2112.39	2704.87	2699.01	2701.94	4.14133
2113.73	2717.04	2628.33	2672.68	62.725
2115.06	2751.26	2540.38	2645.82	149.115
2116.39	2797.37	2439.17	2618.27	253.289
2117.73	2843.86	2334.1	2588.98	360.459
2119.06	2884.31	2234.61	2559.46	459.407
2120.39	2915.13	2153.44	2534.28	538.593
2121.72	2934.65	2103.5	2519.07	587.713
2123.06	2942.96	2096.83	2519.9	598.308
2124.39	2945.07	2140.01	2542.54	569.264
2125.72	2944.32	2233.73	2589.03	502.465
2127.05	2944.29	2368.54	2656.42	407.11
2128.39	2949.25	2522.47	2735.86	301.776
2129.72	2962.87	2687.85	2825.36	194.467
2131.05	2985.68	2858.64	2922.16	89.8301
2132.39	3016.94	3028.8	3022.87	8.39249
2133.72	3054.43	3194.4	3124.41	98.9716
2135.05	3097.27	3353.46	3225.36	181.156
2136.38	3141.65	3502.87	3322.26	255.42
2137.72	3185.87	3638.71	3412.29	320.202
2139.05	3226.41	3760.47	3493.44	377.642
2140.38	3261.8	3867.75	3564.78	428.471
2141.71	3289.9	3958.33	3624.11	472.653
2143.05	3310.68	4032.01	3671.34	510.059
2144.38	3321.74	4088.5	3705.12	542.181
2145.71	3322.83	4127.08	3724.96	568.696
2147.05	3313.74	4147.85	3730.8	589.81
2148.38	3294.08	4151.55	3722.82	606.322
2149.71	3265.62	4136.9	3701.26	616.092
2151.04	3228.54	4104.6	3666.57	619.467
2152.38	3184	4054.14	3619.07	615.28
2153.71	3133.05	3986.32	3559.69	603.356
2155.04	3077.71	3901.47	3489.59	582.482
2156.37	3022.29	3801.52	3411.9	550.996
2157.71	2969.91	3686.67	3328.29	506.828
2159.04	2921.83	3558.33	3240.08	450.075
2160.37	2881.98	3418.03	3150.01	379.041
2161.71	2851.25	3266.78	3059.01	293.825
2163.04	2833.19	3105.75	2969.47	192.728
2164.37	2829.02	2936.79	2882.91	76.202
2165.7	2839.4	2761.77	2800.59	54.8906
2167.04	2863.9	2583.67	2723.78	198.15
2168.37	2899.63	2406.58	2653.1	348.635
2169.7	2942.83	2235.77	2589.3	499.968
2171.04	2989.67	2077.26	2533.47	645.174
2172.37	3035.25	1940.3	2487.77	774.246
2173.7	3081.51	1831.75	2456.63	883.715
2175.03	3122.08	1757.39	2439.73	964.978
2176.37	3158.71	1718.94	2438.82	1018.08
2177.7	3188.18	1714.88	2451.53	1041.78
2179.03	3210.37	1746.67	2478.52	1034.99
2180.36	3223.92	1803.75	2513.84	1004.21
2181.7	3227.39	1889.06	2558.22	946.344
2183.03	3220.45	1997.35	2608.9	864.863
2184.36	3203.33	2126.49	2664.91	761.438
2185.7	3174.69	2273.94	2724.32	636.929
2187.03	3134.76	2437.49	2786.13	493.042
2188.36	3084.35	2613.54	2848.94	332.917
2189.69	3024.31	2799.29	2911.8	159.117
2191.03	2957.77	2988.95	2973.36	22.0482
2192.36	2887.28	3180.11	3033.7	207.057
2193.69	2817.06	3369.4	3093.23	390.565
2195.02	2751.42	3554.76	3153.09	568.046
2196.36	2695.14	3731.75	3213.45	732.994
2197.69	2652.25	3900.7	3276.47	882.781
2199.02	2625.53	4060.92	3343.23	1014.98
2200.36	2618.72	4210.32	3414.52	1125.43
2201.69	2631.92	4346.78	3489.35	1212.59
2203.02	2663.48	4472.39	3567.93	1279.09
2204.35	2709.48	4586	3647.74	1326.9
2205.69	2765.18	4687.52	3726.35	1359.3
2207.02	2825.57	4776.67	3801.12	1379.63
2208.35	2890.45	4855.82	3873.14	1389.72
2209.68	2960.5	4923.68	3942.09	1388.18
2211.02	3027.67	4978.72	4003.2	1379.6
2212.35	3091.53	5023.95	4057.74	1366.43
2213.68	3152.01	5062.28	4107.14	1350.77
2215.02	3205.99	5094.94	4150.47	1335.69
2216.35	3252.18	5120.25	4186.22	1320.92
2217.68	3290.52	5137.63	4214.08	1306.1
2219.01	3320.62	5145.78	4233.2	1290.58
2220.35	3342.42	5147.46	4244.94	1276.36
2221.68	3355.45	5143.95	4249.7	1264.66
2223.01	3361.35	5135.96	4248.66	1254.84
2224.34	3360.86	5123.66	4242.26	1246.49
2225.68	3356.71	5108.56	4232.63	1238.74
2227.01	3350.15	5091.48	4220.81	1231.3
2228.34	3343.48	5073.96	4208.72	1223.63
2229.68	3337.41	5054.28	4195.84	1214.01
2231.01	3333.54	5033.52	4183.53	1202.07
2232.34	3333.88	5010.76	4172.32	1185.73
2233.67	3338.37	4986.46	4162.42	1165.37
2235.01	3345.34	4960	4152.67	1141.74
2236.34	3355.46	4930.46	4142.96	1113.69
2237.67	3365.18	4896.2	4130.69	1082.59
2239	3372.61	4856.39	4114.5	1049.19
2240.34	3377.39	4809.29	4093.34	1012.5
2241.67	3377.68	4753.27	4065.48	972.685
2243	3373.3	4686.75	4030.03	928.751
2244.34	3362.94	4607.95	3985.44	880.355
2245.67	3346.89	4514.69	3930.79	825.76
2247	3325.95	4404.41	3865.18	762.583
2248.33	3300.79	4275.13	3787.96	688.967
2249.67	3272.32	4124.62	3698.47	602.666
2251	3242.01	3953.85	3597.93	503.348
2252.33	3211.46	3762.13	3486.79	389.38
2253.67	3182.34	3554.07	3368.21	262.849
2255	3156.73	3338.04	3247.38	128.207
2256.33	3136.73	3124.31	3130.52	8.78161
2257.66	3122	2927.01	3024.51	137.874
2259	3114.66	2765.58	2940.12	246.839
2260.33	3115.33	2658.73	2887.03	322.865
2261.66	3124.2	2621.06	2872.63	355.779
2262.99	3141.69	2661.87	2901.78	339.286
2264.33	3168.72	2746.88	2957.8	298.284
2265.66	3202.63	2841.45	3022.04	255.391
2266.99	3245.4	2940.92	3093.16	215.296
2268.33	3294.65	3040.31	3167.48	179.842
2269.66	3348.99	3135.4	3242.19	151.037
2270.99	3405.76	3223.3	3314.53	129.019
2272.32	3463.8	3302.89	3383.35	113.78
2273.66	3521.11	3371.53	3446.32	105.771
2274.99	3575.88	3427.49	3501.68	104.932
2276.32	3626.96	3469.68	3548.32	111.217
2277.65	3673.82	3498.25	3586.04	124.149
2278.99	3714.61	3512.91	3613.76	142.628
2280.32	3749.09	3513.58	3631.33	166.53
2281.65	3776.23	3502.3	3639.27	193.702
2282.99	3796.76	3479.84	3638.3	224.099
2284.32	3811.04	3446.71	3628.88	257.62
2285.65	3820.69	3404.52	3612.61	294.281
2286.98	3827.22	3355.48	3591.35	333.568
2288.32	3832.21	3301.97	3567.09	374.932
2289.65	3837.95	3246.52	3542.23	418.205
2290.98	3846.42	3191.1	3518.76	463.379
2292.31	3859.76	3139.41	3499.59	509.367
2293.65	3880.24	3094.22	3487.23	555.798
2294.98	3908.23	3058.56	3483.39	600.81
2296.31	3943.02	3034.16	3488.59	642.658
2297.65	3983.64	3022.16	3502.9	679.866
2298.98	4028.58	3022.29	3525.44	711.55
2300.31	4076.72	3033.4	3555.06	737.736
2301.64	4126.24	3053.25	3589.75	758.721
2302.98	4175.7	3078.18	3626.94	776.062
2304.31	4222.18	3105.9	3664.04	789.33
2305.64	4264.53	3134.15	3699.34	799.297
2306.97	4301.97	3161	3731.48	806.787
2308.31	4332.6	3183.9	3758.25	812.258
2309.64	4354.56	3201.31	3777.94	815.473
2310.97	4367.59	3211.68	3789.63	817.346
2312.31	4369.34	3213.77	3791.55	817.109
2313.64	4360.05	3205.93	3782.99	816.084
2314.97	4339	3188.24	3763.62	813.71
2316.3	4306.71	3160.41	3733.56	810.557
2317.64	4262.38	3122.76	3692.57	805.833
2318.97	4206.22	3074.87	3640.54	799.981
2320.3	4138.14	3019.22	3578.68	791.197
2321.63	4058.39	2955.84	3507.12	779.619
2322.97	3968.56	2887.97	3428.26	764.098
2324.3	3869.75	2818.31	3344.03	743.486
2325.63	3764.46	2751.48	3257.97	716.284
2326.97	3653.67	2690.25	3171.96	681.243
2328.3	3541.71	2639.63	3090.67	637.866
2329.63	3430.89	2603.11	3017	585.331
2330.96	3324.48	2581.6	2953.04	525.29
2332.3	3227.43	2575.74	2901.58	460.811
2333.63	3145.71	2584.72	2865.21	396.677
2334.96	3079.92	2605.83	2842.88	335.231
2336.29	3032.23	2636.14	2834.18	280.074
2337.63	3004.36	2673.93	2839.14	233.655
2338.96	2991.23	2716.01	2853.62	194.61
2340.29	2991.27	2761.15	2876.21	162.722
2341.63	3000.42	2806.84	2903.63	136.879
2342.96	3013.75	2852.65	2933.2	113.914
2344.29	3030.78	2897.5	2964.14	94.2432
2345.62	3048.82	2940.11	2994.47	76.8641
2346.96	3067.18	2979.14	3023.16	62.2499
2348.29	3085.15	3013.86	3049.5	50.4096
2349.62	3104.87	3041.27	3073.07	44.9771
2350.96	3127.75	3061.49	3094.62	46.8549
2352.29	3155.14	3072.59	3113.87	58.3678
2353.62	3188.43	3073.42	3130.93	81.3212
2354.95	3228.98	3063.3	3146.14	117.149
2356.29	3277.36	3040.22	3158.79	167.684
2357.62	3333.51	3004.51	3169.01	232.637
2358.95	3396.07	2955.81	3175.94	311.308
2360.28	3463.29	2894.77	3179.03	402.004
2361.62	3531.07	2821.31	3176.19	501.876
2362.95	3597.65	2737.79	3167.72	608.011
2364.28	3661.52	2648.17	3154.85	716.552
2365.62	3722.28	2557.47	3139.88	823.64
2366.95	3777.57	2474.07	3125.82	921.711
2368.28	3826.45	2407.31	3116.88	1003.48
2369.61	3869.48	2367.77	3118.63	1061.87
2370.95	3905.1	2368.46	3136.78	1086.57
2372.28	3934	2419.5	3176.75	1070.91
2373.61	3954.94	2527.24	3241.09	1009.53
2374.94	3968.87	2686.19	3327.53	906.995
2376.28	3973.36	2871.74	3422.55	778.963
2377.61	3972.47	3062.23	3517.35	643.635
2378.94	3967.5	3254.93	3611.21	503.866
2380.28	3958.2	3443.87	3701.03	363.686
2381.61	3942.95	3624.7	3783.83	225.034
2382.94	3922.41	3793.94	3858.18	90.8419
2384.27	3895.29	3950.91	3923.1	39.329
2385.61	3861.27	4092.48	3976.88	163.494
2386.94	3818.52	4216.42	4017.47	281.356
2388.27	3766.65	4321.75	4044.2	392.518
2389.6	3704.61	4408.07	4056.34	497.417
2390.94	3630.95	4472.37	4051.66	594.976
2392.27	3545.91	4514.64	4030.27	684.99
2393.6	3448.32	4534.93	3991.62	768.353
2394.94	3339.06	4531.58	3935.32	843.242
2396.27	3219.63	4502.81	3861.22	907.346
2397.6	3094.69	4448.39	3771.54	957.213
2398.93	2968.22	4367.2	3667.71	989.229
2400.27	2847.54	4259.37	3553.46	998.317
2401.6	2739.92	4124.75	3432.34	979.217
2402.93	2656.89	3964.47	3310.68	924.6
2404.26	2609.07	3780.82	3194.94	828.549
2405.6	2606.71	3577.06	3091.88	686.144
2406.93	2652.17	3360.06	3006.11	500.558
2408.26	2740.35	3134.81	2937.58	278.924
2409.6	2859.46	2909.89	2884.67	35.6567
2410.93	2993.39	2694.71	2844.05	211.198
2412.26	3133.66	2499.3	2816.48	448.559
2413.59	3276.49	2332.12	2804.31	667.769
2414.93	3415.25	2204.75	2810	855.948
2416.26	3542.98	2124.73	2833.85	1002.85
2417.59	3653.68	2096.94	2875.31	1100.78
2418.92	3751.67	2121.58	2936.62	1152.64
2420.26	3835.9	2193.66	3014.78	1161.24
2421.59	3907.28	2295.03	3101.15	1140.03
2422.92	3966.53	2410.02	3188.27	1100.62
2424.26	4011.8	2533.09	3272.45	1045.61
2425.59	4038.47	2658.76	3348.61	975.596
2426.92	4047.6	2783.6	3415.6	893.779
2428.25	4037.91	2905.52	3471.71	800.723
2429.59	4009.72	3021.51	3515.61	698.767
2430.92	3961.5	3129.28	3545.39	588.467
2432.25	3894.76	3228.14	3561.45	471.375
2433.59	3809.23	3317.45	3563.34	347.743
2434.92	3706.15	3394.53	3550.34	220.346
2436.25	3588.53	3459.76	3524.14	91.0525
2437.58	3458.47	3513.98	3486.22	39.2452
2438.92	3321.89	3555.98	3438.93	165.53
2440.25	3186.36	3585.94	3386.15	282.546
2441.58	3061.46	3603.85	3332.65	383.529
2442.91	2954.77	3610.36	3282.56	463.569
2444.25	2879.53	3603.49	3241.51	511.918
2445.58	2841.58	3584.72	3213.15	525.48
2446.91	2844.77	3551.99	3198.38	500.081
2448.25	2883.82	3504.18	3194	438.66
2449.58	2950.38	3439.13	3194.76	345.6
2450.91	3029.82	3357.57	3193.7	231.753
2452.24	3118.52	3257.46	3187.99	98.2446
2453.58	3211.62	3138.8	3175.21	51.491
2454.91	3306.01	3001.58	3153.79	215.26
2456.24	3398.89	2846	3122.44	390.957
2457.57	3490.03	2671.72	3080.88	578.639
2458.91	3576.75	2483.19	3029.97	773.263
2460.24	3657.12	2285.04	2971.08	970.205
2461.57	3730.82	2083.58	2907.2	1164.77
2462.91	3797.67	1889.12	2843.39	1349.55
2464.24	3856.43	1716.38	2786.4	1513.24
2465.57	3907.83	1579.53	2743.68	1646.36
2466.9	3952.86	1491.03	2721.94	1740.78
2468.24	3991.39	1465.04	2728.22	1786.4
2469.57	4024.15	1495.05	2759.6	1788.35
2470.9	4052.77	1562.17	2807.47	1761.12
2472.23	4077.68	1653.42	2865.55	1714.21
2473.57	4098.56	1754.78	2926.67	1657.3
2474.9	4115.66	1856.9	2986.28	1597.19
2476.23	4127.87	1956.18	3042.03	1535.62
2477.57	4134.73	2048.16	3091.44	1475.43
2478.9	4134.89	2130.51	3132.7	1417.31
2480.23	4127.97	2201.61	3164.79	1362.14
2481.56	4112.67	2264.77	3188.72	1306.66
2482.9	4089.44	2319.06	3204.25	1251.85
2484.23	4056.39	2367.06	3211.73	1194.53
2485.56	4013.13	2410.35	3211.74	1133.34
2486.89	3957.72	2451.77	3204.74	1064.86
2488.23	3890.66	2490.4	3190.53	990.132
2489.56	3811.97	2531.77	3171.87	905.238
2490.89	3722.82	2576.45	3149.64	810.612
2492.23	3623.95	2628.57	3126.26	703.841
2493.56	3515.36	2690.19	3102.78	583.479
2494.89	3398.78	2762.1	3080.44	450.197
2496.22	3276.12	2844.29	3060.21	305.352
2497.56	3151.68	2938.11	3044.89	151.019
2498.89	3030.3	3042.89	3036.6	8.90601
2500.22	2918.68	3157.43	3038.06	168.819
2501.55	2823.32	3279.97	3051.65	322.9
2502.89	2757.56	3407.49	3082.52	459.572
2504.22	2729.67	3536.3	3132.99	570.371
2505.55	2744.5	3663.36	3203.93	649.727
2506.89	2805.23	3786.56	3295.89	693.907
2508.22	2908.68	3900.51	3404.6	701.328
2509.55	3043.57	4004.8	3524.18	679.69
2510.88	3196.56	4098	3647.28	637.414
2512.22	3356.95	4178.79	3767.87	581.13
2513.55	3517.3	4244.81	3881.05	514.421
2514.88	3676.82	4296.73	3986.77	438.343
2516.22	3833.43	4333.06	4083.25	353.291
2517.55	3982.32	4353.32	4167.82	262.34
2518.88	4122.13	4357.3	4239.72	166.292
2520.21	4250.67	4346.72	4298.7	67.9226
2521.55	4365.91	4318.78	4342.35	33.3223
2522.88	4466.42	4274.14	4370.28	135.967
2524.21	4552.87	4213.3	4383.08	240.118
2525.54	4623.5	4137.26	4380.38	343.826
2526.88	4678.66	4045.47	4362.07	447.732
2528.21	4717.33	3940.84	4329.09	549.062
2529.54	4741.7	3822.72	4282.21	649.815
2530.88	4751.76	3691.34	4221.55	749.83
2532.21	4746.52	3548.61	4147.56	847.051
2533.54	4724.89	3396.04	4060.47	939.64
2534.87	4688.87	3234.34	3961.6	1028.51
2536.21	4637.92	3063.63	3850.77	1113.19
2537.54	4573.67	2886.61	3730.14	1192.93
2538.87	4497.03	2704.03	3600.53	1267.84
2540.2	4408.73	2517.82	3463.28	1337.07
2541.54	4311.61	2330.51	3321.06	1400.85
2542.87	4208.35	2146.27	3177.31	1458.11
2544.2	4103.11	1966.79	3034.95	1510.6
2545.54	3998.35	1795.73	2897.04	1557.48
2546.87	3897.93	1634.09	2766.01	1600.78
2548.2	3807.09	1477.83	2642.46	1647.03
2549.53	3729.12	1325.55	2527.33	1699.58
2550.87	3665.61	1176.25	2420.93	1760.24
2552.2	3617.23	1032.09	2324.66	1827.97
2553.53	3585.37	892.232	2238.8	1904.33
2554.86	3570.66	760.319	2165.49	1987.21
2556.2	3572.61	641.608	2107.11	2072.53
2557.53	3589.26	543.591	2066.43	2153.62
2558.86	3618.74	471.178	2044.96	2225.67
2560.2	3658.21	432.125	2045.17	2281.19
2561.53	3704.19	438.933	2071.56	2308.88
2562.86	3753.53	481.564	2117.55	2313.63
2564.19	3802.08	561.303	2181.69	2291.58
2565.53	3847.72	680.758	2264.24	2239.38
2566.86	3887.89	827.666	2357.78	2163.9
2568.19	3919.92	986.931	2453.42	2073.93
2569.52	3941.99	1155.28	2548.64	1970.5
2570.86	3952.86	1327.97	2640.42	1856.08
2572.19	3950.69	1501.85	2726.27	1731.59
2573.52	3934.54	1674.92	2804.73	1597.79
2574.86	3903.76	1845.01	2874.38	1455.76
2576.19	3858.55	2008.11	2933.33	1308.46
2577.52	3799.54	2163.45	2981.49	1156.89
2578.85	3727.12	2309.59	3018.36	1002.34
2580.19	3642.3	2445.95	3044.12	845.946
2581.52	3548.48	2570.8	3059.64	691.323
2582.85	3446.05	2683.35	3064.7	539.314
2584.18	3340.96	2784.81	3062.88	393.262
2585.52	3237.2	2874.3	3055.75	256.616
2586.85	3139.69	2951.14	3045.42	133.328
2588.18	3052.22	3015.24	3033.73	26.1504
2589.52	2978.19	3067.18	3022.68	62.9256
2590.85	2920.5	3105.78	3013.14	131.012
2592.18	2878.83	3131.53	3005.18	178.687
2593.51	2851.41	3144.26	2997.84	207.078
2594.85	2836.21	3143.07	2989.64	216.984
2596.18	2828.86	3125.33	2977.1	209.641
2597.51	2827.1	3091.12	2959.11	186.69
2598.84	2827.73	3037.9	2932.82	148.612
2600.18	2829.54	2965.04	2897.29	95.8087
2601.51	2830.35	2870.19	2850.27	28.169
2602.84	2829.66	2753.67	2791.66	53.7367
2604.18	2825.68	2614.23	2719.96	149.515
2605.51	2817.76	2453.41	2635.58	257.637
2606.84	2803.77	2274.4	2539.09	374.317
2608.17	2783.61	2083.09	2433.35	495.341
2609.51	2754.35	1889.67	2322.01	611.42
2610.84	2712.25	1709.33	2210.79	709.173
2612.17	2659.16	1559.14	2109.15	777.83
2613.51	2601.29	1457.63	2029.46	808.688
2614.84	2535.97	1425.19	1980.58	785.446
2616.17	2465.7	1476.12	1970.91	699.74
2617.5	2397.12	1600.82	1998.97	563.065
2618.84	2336.55	1749.48	2043.02	415.118
2620.17	2282.91	1911.27	2097.09	262.792
2621.5	2235.46	2080.77	2158.11	109.382
2622.83	2193.67	2256.92	2225.29	44.7217
2624.17	2154.09	2434.05	2294.07	197.96
2625.5	2113.98	2608.33	2361.16	349.557
2626.83	2070.71	2776.99	2423.85	499.417
2628.17	2025.56	2940.67	2483.12	647.082
2629.5	1983.28	3094.52	2538.9	785.767
2630.83	1948	3237.56	2592.78	911.855
2632.16	1923.69	3369.63	2646.66	1022.43
2633.5	1914.76	3490.8	2702.78	1114.43
2634.83	1924.51	3598.88	2761.7	1183.96
2636.16	1956.61	3694.2	2825.41	1228.66
2637.49	2005.75	3776.52	2891.13	1252.12
2638.83	2068.85	3846.42	2957.64	1256.93
2640.16	2142.57	3902.22	3022.39	1244.26
2641.49	2224.78	3944.73	3084.76	1216.19
2642.83	2313.19	3972.72	3142.96	1173.46
2644.16	2404.55	3985.95	3195.25	1118.22
2645.49	2497.2	3981.39	3239.29	1049.48
2646.82	2590.38	3959.42	3274.9	968.053
2648.16	2679.33	3919.53	3299.43	876.952
2649.49	2760.94	3865.29	3313.12	780.893
2650.82	2837.98	3796.8	3317.39	677.992
2652.15	2913.21	3712.54	3312.87	565.211
2653.49	2983.89	3612.17	3298.03	444.255
2654.82	3048.07	3496.39	3272.23	317.011
2656.15	3105.43	3367.34	3236.38	185.201
2657.49	3154.77	3229.61	3192.19	52.9242
2658.82	3195.49	3090.15	3142.82	74.4875
2660.15	3224.74	2957.66	3091.2	188.856
[truncated: 2,504 more rows]
