# Supplementary material for: Ionogel thin films as a compatibilizing pretreatment for electrospray deposition
Source: Royal Society of Chemistry journal article supplement (doi:10.1039/d5lp00359h), 2026-01-01
Supplement: d5lp00359h1.zip [file E data.xlsx]

## Sheet: Sheet1
Lateral	Height Data	Height Data
µm	nm	nm
	2.1	2.2
0	-4.16881	-0.424524
1.33274	-3.6234	-0.470783
2.66548	-3.80511	-0.49516
3.99822	-3.2146	-0.371882
5.33096	-3.32178	-0.47354
6.66371	-3.087	-0.228879
7.99645	-2.87818	0.272265
9.32919	-2.7272	0.435206
10.6619	-2.70821	0.693057
11.9947	-2.41146	0.577269
13.3274	-2.46146	0.769075
14.6602	-2.49688	0.659114
15.9929	-2.49664	1.12218
17.3256	-2.57639	1.29395
18.6584	-2.6005	1.27296
19.9911	-2.42997	1.29919
21.3239	-2.4338	1.62375
22.6566	-2.48865	1.48648
23.9893	-2.58633	1.24628
25.3221	-2.2151	1.17096
26.6548	-1.99916	1.03149
27.9876	-1.96527	1.09003
29.3203	-2.00111	1.23041
30.653	-1.97999	1.31991
31.9858	-2.01988	1.21943
33.3185	-1.86186	1.17208
34.6513	-1.74571	1.05474
35.984	-1.92344	0.993818
37.3167	-1.63489	1.1193
38.6495	-1.49208	1.05215
39.9822	-1.25938	0.780074
41.315	-1.07205	0.809037
42.6477	-0.819362	0.647154
43.9805	-1.1424	0.664134
45.3132	-0.917482	0.73773
46.6459	-1	0.483479
47.9787	-0.768343	0.14784
49.3114	-0.841614	0.128702
50.6442	-0.724878	0.324158
51.9769	-0.661166	0.23269
53.3096	-0.655431	-0.156792
54.6424	-0.710877	0.296352
55.9751	-0.325083	0.476687
57.3079	-0.380398	0.345309
58.6406	-0.65096	0.261883
59.9733	-0.626778	0.482
61.3061	-0.540097	0.124312
62.6388	-0.641929	-0.0702658
63.9716	-0.681947	0.047127
65.3043	-0.648933	0.108681
66.6371	-0.662754	-0.0188992
67.9698	-0.470234	0.043896
69.3025	-0.447381	-0.314484
70.6353	-0.605405	-0.327886
71.968	-0.441539	-0.0878459
73.3008	-0.200726	0.283483
74.6335	-0.277362	0.641369
75.9662	-0.31215	0.57685
77.299	-0.301087	0.690565
78.6317	-0.493819	0.727356
79.9645	-0.638313	0.673885
81.2972	-0.470866	0.64935
82.6299	-0.490297	0.528971
83.9627	-0.459461	0.314837
85.2954	-0.630912	0.396481
86.6282	-0.752427	0.03468
87.9609	-1.06023	-0.0151368
89.2936	-0.784475	0.145817
90.6264	-0.659284	0.266848
91.9591	-0.574047	-0.0438788
93.2919	-0.78556	0.0867171
94.6246	-0.665231	0.171909
95.9574	-0.450431	0.0736325
97.2901	-0.278424	-0.216265
98.6228	-0.294078	0.188792
99.9556	-0.260813	0.1688
101.288	-0.179773	-0.0520018
102.621	-0.305117	-0.21769
103.954	-0.512431	-0.0579677
105.287	-0.535669	-0.190045
106.619	-0.355901	0.00715661
107.952	-0.220369	-0.0889315
109.285	-0.515215	0.137865
110.618	-0.234426	0.0633865
111.95	-0.236836	0.0524309
113.283	-0.285775	-0.0122863
114.616	0	0
115.948	0.119721	0.0959248
117.281	0.182184	0.275047
118.614	0.057456	0.40619
119.947	0.251963	0.481417
121.279	0.275085	0.122825
122.612	0.245342	0.0923521
123.945	0.416488	0.547272
125.278	0.790757	0.858021
126.61	0.599338	0.8648
127.943	0.449217	0.795239
129.276	0.733743	1.02422
130.609	0.70871	0.670229
131.941	0.485391	0.726588
133.274	0.702565	0.839041
134.607	0.624198	0.754747
135.94	0.746835	0.473163
137.272	0.828743	0.512831
138.605	0.865244	0.393159
139.938	0.85237	0.740235
141.271	1.16341	0.669787
142.603	1.16246	1.15449
143.936	1.20019	0.673002
145.269	1.14455	0.575401
146.602	0.862782	0.264248
147.934	0.734652	0.255698
149.267	0.902645	-0.0531038
150.6	0.617111	0.0987067
151.932	0.499194	0.225564
153.265	0.320828	0.436159
154.598	0.474172	0.335907
155.931	0.346729	0.156973
157.263	0.312087	0.156021
158.596	0.633394	-0.0346771
159.929	0.678139	-0.0368889
161.262	0.794704	0.0343975
162.594	0.841418	0.0520381
163.927	0.923484	0.135307
165.26	0.902717	-0.222145
166.593	0.647	-0.396116
167.925	0.167114	0.138607
169.258	0	0
170.591	0.065589	0.0349154
171.924	0.633853	-0.373383
173.256	0.692043	-0.334773
174.589	0.704991	-0.444162
175.922	0.666259	0.0560792
177.255	0.948605	0.162128
178.587	0.91958	0.214012
179.92	1.06383	0.0738771
181.253	0.883171	0.490994
182.586	0.756107	0.0851932
183.918	0.833643	0.0937687
185.251	0.881695	0.0459684
186.584	1.02681	0.200512
187.916	1.39172	-0.0620457
189.249	1.71164	0.388384
190.582	1.32896	0.183567
191.915	1.36077	0.426747
193.247	1.45918	0.622622
194.58	1.62894	0.496923
195.913	1.3676	0.539403
197.246	1.55673	0.381928
198.578	1.71614	0.406103
199.911	1.8373	0.25175
201.244	1.91117	0.177285
202.577	2.30944	0.573897
203.909	2.02012	0.686844
205.242	2.03141	0.482879
206.575	2.11628	0.829835
207.908	2.53072	0.470564
209.24	2.13782	0.510761
210.573	2.42748	0.340527
211.906	2.41808	0.3364
213.239	2.59407	-0.115442
214.571	2.57765	0.00398328
215.904	2.61166	-0.0236749
217.237	2.45045	0.0516395
218.57	2.47813	0.108766
219.902	2.33337	0.519338
221.235	2.64691	0.392645
222.568	2.79459	0.581218
223.9	3.0015	0.461167
225.233	2.74776	0.650179
226.566	2.52194	0.401441
227.899	2.59367	0.587887
229.231	2.59978	0.724292
230.564	2.53806	0.548402
231.897	2.41431	0.433175
233.23	2.49473	0.769041
234.562	2.41966	0.679035
235.895	2.44665	0.642302
237.228	2.83975	0.91519
238.561	2.96863	0.488227
239.893	3.05831	0.350643
241.226	3.47563	0.525643
242.559	3.45456	0.63499
243.892	3.22065	0.406878
245.224	3.28411	0.462443
246.557	3.66666	-0.061643
247.89	3.36201	-0.275796
249.223	3.23721	-0.26134
250.555	3.44566	0.252839
251.888	3.87131	0.130234
253.221	3.74166	0.470421
254.554	3.78378	0.271127
255.886	3.62712	0.519175
257.219	3.7731	0.346655
258.552	3.85472	0.622018
259.884	3.73982	0.600927
261.217	3.55775	0.64328
262.55	3.70502	0.748203
263.883	3.57165	0.782767
265.215	3.91024	0.737433
266.548	4.10104	0.73506
267.881	4.37485	0.528948
269.214	4.21871	0.376348
270.546	4.25336	0.421844
271.879	4.2468	0.567429
273.212	4.45579	0.596289
274.545	4.75791	0.828179
275.877	5.01246	1.44103
277.21	5.07319	2.5394
278.543	4.79997	5.04598
279.876	4.95163	10.1279
281.208	5.04781	19.2272
282.541	4.95702	35.4307
283.874	5.05502	62.4368
285.207	5.22196	102.834
286.539	5.19692	160.886
287.872	5.21944	238.881
289.205	5.16446	337.506
290.538	5.15815	454.073
291.87	4.82971	565.988
293.203	5.06597	652.659
294.536	5.00653	712.809
295.869	5.13886	740.267
297.201	5.08569	733.539
298.534	5.08705	692.018
299.867	5.01775	620.542
301.199	4.87518	527.024
302.532	5.04167	423.187
303.865	4.89594	322.603
305.198	4.80946	242.52
306.53	4.92496	196.692
307.863	4.7533	163.117
309.196	4.80144	134.755
310.529	5.21585	109.984
311.861	5.24122	89.6586
313.194	5.35771	73.3843
314.527	5.68991	60.1138
315.86	5.85026	49.2715
317.192	5.81515	40.3472
318.525	5.95477	32.9215
319.858	5.77085	27.4206
321.191	6.01833	22.4555
322.523	5.83519	18.7966
323.856	6.0978	15.6548
325.189	6.07211	12.5012
326.522	6.25482	10.3619
327.854	6.15092	8.80773
329.187	6.5076	7.38653
330.52	6.57187	6.27699
331.853	6.94407	5.05233
333.185	6.85682	4.43004
334.518	6.78762	3.64713
335.851	6.2408	2.93065
337.183	6.48654	2.6596
338.516	6.30111	2.58604
339.849	6.67574	2.43744
341.182	6.61286	2.43503
342.514	6.2154	2.42973
343.847	6.12476	2.26525
345.18	6.11924	2.16782
346.513	6.45779	2.12735
347.845	6.38111	1.88405
349.178	6.49549	1.6873
350.511	6.55331	1.42945
351.844	6.42617	1.25672
353.176	6.2456	1.44597
354.509	6.53754	1.50703
355.842	6.69688	1.55207
357.175	6.86644	1.8231
358.507	7.08698	2.182
359.84	7.83099	1.84652
361.173	8.41484	1.92767
362.506	10.3456	1.82145
363.838	13.0958	1.65634
365.171	18.8587	1.82568
366.504	29.1323	2.09275
367.837	46.764	2.0679
369.169	74.2915	2.11037
370.502	116.696	2.21767
371.835	176.302	2.38231
373.167	257.474	2.09063
374.5	360.885	2.09185
375.833	484.833	2.03286
377.166	604.197	2.04849
378.498	718.363	1.89994
379.831	825.224	2.22438
381.164	925.017	2.27859
382.497	1016.37	2.42048
383.829	1096.48	2.51929
385.162	1162.68	2.69019
386.495	1212.32	2.54906
387.828	1247.65	2.84519
389.16	1268.35	2.58633
390.493	1275.28	2.51987
391.826	1272.73	2.79892
393.159	1265.98	3.18119
394.491	1258.36	2.89477
395.824	1255.49	3.17675
397.157	1259.74	3.414
398.49	1263.81	3.33135
399.822	1266.79	3.28944
401.155	1272.48	3.41952
402.488	1281.5	3.22268
403.821	1291.93	3.07478
405.153	1303.85	3.25066
406.486	1318.76	3.1379
407.819	1335.2	3.23753
409.151	1351.46	3.30852
410.484	1367.87	3.46866
411.817	1383.49	3.57972
413.15	1395.42	3.873
414.482	1400.45	3.57373
415.815	1398.69	3.53999
417.148	1390.25	3.16039
418.481	1376.86	3.19762
419.813	1359.75	3.05055
421.146	1342.55	3.10048
422.479	1328.08	2.85802
423.812	1318.31	3.20632
425.144	1314.97	3.02861
426.477	1318.33	3.31249
427.81	1327.41	3.18882
429.143	1341.15	3.27122
430.475	1354.35	3.4437
431.808	1363.13	3.70089
433.141	1365.21	3.40018
434.474	1362.11	3.53196
435.806	1354.63	3.73401
437.139	1344.33	3.99178
438.472	1333.21	3.5344
439.805	1322.12	3.4861
441.137	1312.03	3.51049
442.47	1299.52	3.24545
443.803	1281.53	3.58631
445.135	1253.58	3.80327
446.468	1217.77	4.00527
447.801	1176.25	3.92721
449.134	1135.89	4.30966
450.466	1101.61	4.51992
451.799	1082.86	4.65196
453.132	1087.29	4.43787
454.465	1120.19	4.37857
455.797	1170.56	3.99348
457.13	1223.89	4.30624
458.463	1277.39	4.34018
459.796	1330.08	4.58261
461.128	1382.29	4.40315
462.461	1433.19	4.67049
463.794	1480.84	4.51587
465.127	1525.45	4.68208
466.459	1564.94	4.80712
467.792	1596.77	4.76187
469.125	1619.14	4.67484
470.458	1631.83	4.93621
471.79	1635.79	5.17863
473.123	1630.95	5.38691
474.456	1616.74	5.54784
475.789	1592.89	5.65242
477.121	1563.16	5.4462
478.454	1530.71	5.43539
479.787	1496.74	5.90019
481.12	1460.77	6.12107
482.452	1421.93	6.38855
483.785	1378.67	6.71589
485.118	1328.88	7.6654
486.45	1270.66	9.71889
487.783	1198.04	14.441
489.116	1108.9	22.6687
490.449	1002.64	37.5569
491.781	883.102	62.1733
493.114	753.468	101.068
494.447	620.589	158.337
495.78	496.157	238.498
497.112	390.62	343.467
498.445	314.49	474.572
499.778	270.88	620.189
501.111	242.321	753.089
502.443	227.452	867.968
503.776	229.959	965.648
505.109	252.341	1041
506.442	295.26	1093.1
507.774	359.965	1121.85
509.107	443.573	1126.5
510.44	529.299	1104.73
511.773	615.683	1057.17
513.105	702.805	986.577
514.438	791.242	896.678
515.771	881.165	795.575
517.104	973.557	693.269
518.436	1067.85	598.937
519.769	1163.19	524.905
521.102	1253.88	480.268
522.434	1330.12	471.299
523.767	1390.9	492.198
525.1	1435.65	528.31
526.433	1463.11	579.831
527.765	1474.66	644.268
529.098	1473.58	714.338
530.431	1463.2	781.165
531.764	1445.14	843.071
533.096	1419.69	897.022
534.429	1386.21	943.121
535.762	1345.24	980.319
537.095	1295.13	1008.82
538.427	1237.81	1027.8
539.76	1173.71	1036.84
541.093	1106.23	1034.21
542.426	1038.95	1021.09
543.758	977.844	998.89
545.091	929.572	969.218
546.424	896.254	934.222
547.757	874.848	894.827
549.089	870.057	851.432
550.422	881.548	804.481
551.755	907.471	754.969
553.088	939.988	700.33
554.42	972.416	641.949
555.753	1000.7	581.718
557.086	1022.48	522.507
558.418	1038.48	462.184
559.751	1048.86	404.267
561.084	1057.25	352.247
562.417	1067.95	310.656
563.749	1083.87	284.165
565.082	1109.67	273.608
566.415	1144.74	272.849
567.748	1187.92	271.887
569.08	1234.05	266.743
570.413	1280.7	258.968
571.746	1325.91	251.964
573.079	1369.12	254.847
574.411	1411.96	275.557
575.744	1453.91	324.589
577.077	1494.39	412.59
578.41	1534.27	530.496
579.742	1573.64	661.191
581.075	1610.85	785.396
582.408	1645.92	902.233
583.741	1677.67	1011.49
585.073	1703.58	1113.83
586.406	1719.01	1208.9
587.739	1725.33	1292.86
589.072	1721.05	1361.97
590.404	1703.79	1415.26
591.737	1675.81	1450.25
593.07	1636.35	1465.06
594.402	1587.13	1459.35
595.735	1530.21	1432.69
597.068	1468.76	1387.14
598.401	1407.91	1326.44
599.733	1350.24	1255.07
601.066	1298.87	1177.51
602.399	1256.39	1097.27
603.732	1226.93	1018.13
605.064	1213.58	933.15
606.397	1212.77	834.795
607.73	1223.64	724.315
609.063	1241.53	608.488
610.395	1263.38	497.92
611.728	1281.13	405.511
613.061	1291.38	347.864
614.394	1290.24	334.481
615.726	1278.75	348.262
617.059	1256.71	387.247
618.392	1225.85	453.685
619.725	1190.13	545.334
621.057	1157.28	645.082
622.39	1131.98	732.183
623.723	1120.08	810.601
625.056	1122.57	879.1
626.388	1134.98	936.678
627.721	1147.73	983.505
629.054	1158.65	1022.11
630.386	1167.29	1055.55
631.719	1177.36	1086.15
633.052	1187.93	1116.03
634.385	1201.36	1148.85
635.717	1219.2	1182.48
637.05	1239.29	1216.06
638.383	1259.76	1246.59
639.716	1278.52	1273.05
641.048	1296.57	1291.77
642.381	1312.36	1299.41
643.714	1326.73	1294.47
645.047	1338.61	1276.59
646.379	1348.64	1246.94
647.712	1357.94	1206.48
649.045	1365.25	1160.78
650.378	1367.69	1116.65
651.71	1366.25	1077.54
653.043	1357.08	1048.48
654.376	1339.71	1031.78
655.709	1312.74	1026.87
657.041	1280.18	1026.21
658.374	1242.25	1027.11
659.707	1201.79	1028.2
661.04	1163.3	1025.78
662.372	1130.03	1015.47
663.705	1105.27	994.347
665.038	1091.88	959.205
666.371	1087.22	905.583
667.703	1090.04	833.031
669.036	1099.82	742.802
670.369	1114.14	640.046
671.701	1133.2	530.718
673.034	1156.4	424.061
674.367	1176.84	331.681
675.7	1188.84	264.774
677.032	1191.31	229.615
678.365	1185.81	209.388
679.698	1175.83	202.374
681.031	1163.78	213.296
682.363	1158.43	243.712
683.696	1164.51	294.695
685.029	1186.81	367.052
686.362	1217.24	458.553
687.694	1255.38	545.047
689.027	1288.19	620.671
690.36	1305.23	685.647
691.693	1303.37	743.801
693.025	1281.45	799.98
694.358	1237.41	859.226
695.691	1172.96	921.676
697.024	1087.19	983.02
698.356	983.257	1041.17
699.689	865.282	1095.38
701.022	738.501	1145.39
702.355	611.411	1192.04
703.687	490.949	1232.91
705.02	386.963	1263.19
706.353	309.113	1280.23
707.685	260.967	1282.09
709.018	222.96	1266.68
710.351	191.861	1234.87
711.684	167.721	1190.75
713.016	149.529	1137.35
714.349	135.964	1076.76
715.682	126.124	1014.1
717.015	115.257	948.69
718.347	102.606	874.818
719.68	89.2641	788.026
721.013	81.6417	690.099
722.346	87.7924	587.217
723.678	103.904	491.075
725.011	133.323	416.3
726.344	180.155	376.12
727.677	247.296	379.396
729.009	339.633	415.88
730.342	457.333	479.279
731.675	585.45	564.906
733.008	723.057	661.859
734.34	866.531	758.053
735.673	1008.22	844.416
737.006	1142.66	919.798
738.339	1267.81	982.937
739.671	1384.01	1034.08
741.004	1488.65	1077.46
742.337	1581.24	1115.38
743.669	1663.62	1148.79
745.002	1735.26	1174.97
746.335	1797.79	1190.77
747.668	1854.67	1191.76
749	1905.01	1176.67
750.333	1948.33	1142.87
751.666	1984.58	1088.93
752.999	2011.31	1013.08
754.331	2026.16	917.761
755.664	2028.17	806.964
756.997	2019.85	685.224
758.33	1999.87	560.96
759.662	1969.53	444.314
760.995	1931.64	344.526
762.328	1893.46	272.246
763.661	1859.68	227.398
764.993	1836.18	188.864
766.326	1829.16	157.501
767.659	1838.16	132.279
768.992	1856.55	114.724
770.324	1874.32	105.123
771.657	1885.53	105.036
772.99	1887.55	117.58
774.323	1876.84	144.134
775.655	1852.23	187.664
776.988	1814.65	250.285
778.321	1764.48	331.049
779.653	1705.98	427.721
780.986	1644.99	515.46
782.319	1587.78	586.22
783.652	1539.77	633.808
784.984	1506.19	657.322
786.317	1488.64	655.723
787.65	1483.34	631.809
788.983	1484.12	589.694
790.315	1489.26	537.336
791.648	1495.68	481.071
792.981	1501.16	428.916
794.314	1507.26	383.823
795.646	1516.09	331.865
796.979	1529.28	275.498
798.312	1551.96	229.646
799.645	1587.82	211.837
800.977	1637.29	225.606
802.31	1698.34	256.82
803.643	1763.58	309.661
804.976	1821.69	382.999
806.308	1870.47	474.522
807.641	1906.84	559.854
808.974	1929.08	634.266
810.307	1936.58	696.242
811.639	1932.41	743.701
812.972	1920.33	775.387
814.305	1902.66	790.878
815.637	1885.65	792.347
816.97	1873.44	782.026
818.303	1871.74	764.99
819.636	1885.48	745.497
820.968	1906.21	726.774
822.301	1926.85	705.947
823.634	1940.65	682.161
824.967	1944.05	657.387
826.299	1935.98	637.45
827.632	1916.86	630.106
828.965	1886.52	643.208
830.298	1846.46	679.439
831.63	1801.87	725.765
832.963	1756.68	774.128
834.296	1718.24	821.738
835.629	1688.34	868.31
836.961	1669.82	913.535
838.294	1666.78	957.513
839.627	1676.14	1002.24
840.96	1694.78	1048.44
842.292	1722.36	1099.13
843.625	1758.27	1154.73
844.958	1800.28	1216.69
846.291	1847.16	1284.07
847.623	1896.91	1354.65
848.956	1945.53	1425.44
850.289	1988.43	1492.21
851.622	2027.05	1551.86
852.954	2061.56	1599.87
854.287	2090.08	1635.64
855.62	2110.54	1656.8
856.952	2121.14	1662.89
858.285	2120.4	1653.6
859.618	2109.57	1631.6
860.951	2089.74	1597.09
862.283	2061.02	1553.95
863.616	2025.34	1504.5
864.949	1983.28	1450.6
866.282	1934.13	1392.33
867.614	1880.34	1328.42
868.947	1822.21	1253.56
870.28	1757.47	1166.17
871.613	1690.07	1063.73
872.945	1624.41	946.791
874.278	1560.77	817.251
875.611	1504.92	682.278
876.944	1464.37	550.764
878.276	1442.85	433.131
879.609	1441.54	340.83
880.942	1459.7	284.121
882.275	1494.32	246.396
883.607	1541.45	222.905
884.94	1597.32	214.642
886.273	1656.21	224.669
887.606	1710.8	255.851
888.938	1758.24	308.392
890.271	1794.64	383.134
891.604	1817.8	476.31
892.936	1829.77	563.814
894.269	1830.77	639.995
895.602	1823.71	700.853
896.935	1808.59	749.738
898.267	1786.84	787.768
899.6	1763.73	816.803
900.933	1740.98	838.195
902.266	1721.47	851.031
903.598	1706.58	853.777
904.931	1697.5	842.713
906.264	1693.14	814.414
907.597	1695.7	765.407
908.929	1700.83	694.787
910.262	1705.14	605.01
911.595	1706.99	504.658
912.928	1706.56	404.777
914.26	1703.41	323.425
915.593	1698.92	279.827
916.926	1693.26	276.371
918.259	1689.65	293.725
919.591	1689.91	337.823
920.924	1697.11	408.584
922.257	1710.83	508.44
923.59	1729.61	634.274
924.922	1752.75	749.107
926.255	1778.75	849.591
927.588	1803.38	933.387
928.92	1825.42	1002.96
930.253	1843.36	1057.84
931.586	1855.23	1104.51
932.919	1862.93	1146.79
934.251	1866.1	1192.96
935.584	1864.72	1247.9
936.917	1858.47	1318.67
938.25	1850.67	1403.06
939.582	1840.41	1494.77
940.915	1827.89	1589.03
942.248	1813.78	1684.74
943.581	1802.33	1779.96
944.913	1790.29	1875.19
946.246	1779.1	1971.23
947.579	1768.79	2067.15
948.912	1760.87	2161.72
950.244	1754.57	2252.77
951.577	1751.79	2339.43
952.91	1753.86	2418.84
954.243	1759.29	2485.39
955.575	1765.64	2540.51
956.908	1770.05	2581.17
958.241	1771	2607.92
959.574	1766.82	2618.45
960.906	1757.03	2610.92
962.239	1741.53	2586.18
963.572	1721.66	2541.77
964.904	1694.96	2478.86
966.237	1664.72	2398.72
967.57	1633.8	2303.9
968.903	1606.39	2198.75
970.235	1586.8	2088.73
971.568	1580.03	1979.91
972.901	1586.9	1880.29
974.234	1607.59	1799.99
975.566	1636.77	1746.27
976.899	1668.07	1722.93
978.232	1694.46	1726.4
979.565	1714.75	1748.14
980.897	1723.44	1780.03
982.23	1720.36	1816.2
983.563	1706.39	1853.56
984.896	1685.25	1889.89
986.228	1660.97	1922.52
987.561	1634.49	1949.63
988.894	1611.82	1969.34
990.227	1598.1	1982.36
991.559	1597.24	1989.49
992.892	1613.64	1992.41
994.225	1645.13	1991.34
995.558	1687.47	1988.66
996.89	1737.79	1985.69
998.223	1791.32	1984.5
999.556	1846.12	1985.27
1000.89	1899.77	1986.62
1002.22	1953.11	1988.06
1003.55	2003.07	1988.59
1004.89	2049.95	1985.01
1006.22	2092.38	1976.06
1007.55	2132.07	1959.64
1008.88	2166.48	1935.41
1010.22	2196.46	1901.44
1011.55	2223.28	1857.97
1012.88	2245.44	1803.54
1014.22	2260.29	1739.29
1015.55	2268.48	1663.61
1016.88	2268.02	1578.78
1018.21	2258.62	1485.11
1019.55	2239.76	1384.28
1020.88	2212.01	1276.6
1022.21	2174.93	1164.41
1023.55	2131.51	1051.64
1024.88	2088.01	941.967
1026.21	2046.63	842.405
1027.54	2013	763.455
1028.88	1992.78	717.332
1030.21	1986.62	711.291
1031.54	1990.43	745.679
1032.87	1999.66	813.217
1034.21	2006.69	900.123
1035.54	2010	993.798
1036.87	2006.42	1085.67
1038.21	1995.98	1170.85
1039.54	1979.51	1247.2
1040.87	1956.41	1312.15
1042.2	1926.36	1364.59
1043.54	1893.1	1403.22
1044.87	1856.47	1430.59
1046.2	1820.39	1448.54
1047.53	1787.9	1462.58
1048.87	1761.81	1476.04
1050.2	1742.07	1495.31
1051.53	1730.08	1523.57
1052.87	1723.41	1566.18
1054.2	1717.03	1621.73
1055.53	1703.36	1687.24
1056.86	1682.34	1757.07
1058.2	1654.34	1827.13
1059.53	1619.07	1894.24
1060.86	1580.85	1956.24
1062.19	1542.94	2010.82
1063.53	1514.53	2057.44
1064.86	1502.12	2094.08
1066.19	1513.28	2119.99
1067.53	1551.42	2134.69
1068.86	1618.05	2138.28
1070.19	1691.08	2130.67
1071.52	1762.91	2112.35
1072.86	1826.18	2084.24
1074.19	1878.56	2049.4
1075.52	1915.99	2011.26
1076.85	1938.32	1972.41
1078.19	1942.77	1936.83
1079.52	1930.77	1908.93
1080.85	1903.08	1892.18
1082.19	1862.83	1888.61
1083.52	1812.75	1900.83
1084.85	1759.33	1926.71
1086.18	1707.83	1963.57
1087.52	1665.74	2010.71
1088.85	1639.1	2066.67
1090.18	1634.1	2129.29
1091.51	1650.14	2197.86
1092.85	1684.28	2273.34
1094.18	1731.58	2355.28
1095.51	1785.27	2440.38
1096.85	1840.48	2528.28
1098.18	1892.98	2617.01
1099.51	1943.31	2702.49
1100.84	1986.32	2782.35
1102.18	2022.88	2856.38
1103.51	2053.51	2920.6
1104.84	2076.95	2972.99
1106.18	2094.62	3011.46
1107.51	2110.15	3035.26
1108.84	2123.23	3043.54
1110.17	2136.84	3035.46
1111.51	2151.55	3010.54
1112.84	2168.95	2968.6
1114.17	2188.39	2909.19
1115.5	2210.28	2834.16
1116.84	2237.99	2744.74
1118.17	2270.97	2643.37
1119.5	2312.53	2532.75
1120.84	2358.54	2415.76
1122.17	2409.41	2296.78
1123.5	2463	2179.68
1124.83	2517.37	2069.17
1126.17	2569.97	1968.41
1127.5	2619.82	1881.12
1128.83	2666.16	1808.67
1130.16	2705.69	1751.59
1131.5	2737.27	1710.26
1132.83	2761.51	1686.08
1134.16	2777.15	1679.65
1135.5	2782.18	1690.32
1136.83	2777.74	1713.81
1138.16	2764.17	1744.21
1139.49	2742.92	1778.44
1140.83	2714.74	1812.99
1142.16	2678.74	1845.37
1143.49	2637.59	1875.14
1144.82	2593.06	1901.9
1146.16	2546.11	1925.17
1147.49	2497.07	1945.05
1148.82	2449.07	1959.5
1150.16	2403.29	1970.57
1151.49	2361.82	1980.32
1152.82	2326.77	1989.52
1154.15	2299.62	1999.68
1155.49	2278.91	2013.83
1156.82	2265.91	2036.1
1158.15	2260.13	2069.75
1159.48	2257.64	2115.35
1160.82	2258.4	2175.77
1162.15	2264.57	2252.46
1163.48	2277.24	2342.95
1164.82	2295.49	2441.58
1166.15	2320.19	2544.18
1167.48	2351.02	2647.69
1168.81	2387.6	2746.99
1170.15	2427.88	2839.75
1171.48	2470.73	2923.84
1172.81	2512.58	2996.17
1174.14	2553.43	3055.75
1175.48	2590.2	3101.87
1176.81	2622.32	3132
1178.14	2647.64	3145.4
1179.48	2664.7	3142.17
1180.81	2675.39	3122.21
1182.14	2679.8	3085.51
1183.47	2678	3033.78
1184.81	2671.96	2967.16
1186.14	2663.2	2885.94
1187.47	2651.51	2792.69
1188.8	2639.65	2689.64
1190.14	2627.08	2580.6
1191.47	2613.71	2468.61
1192.8	2599.69	2359.9
1194.14	2583.92	2258.83
1195.47	2566.82	2171.92
1196.8	2548.75	2104.53
1198.13	2528.89	2059.54
1199.47	2508.98	2035.79
1200.8	2487.93	2032.55
1202.13	2466.78	2041.9
1203.47	2443.88	2058.16
1204.8	2421.58	2077.92
1206.13	2399.5	2097.84
1207.46	2378.13	2115.21
1208.8	2358.71	2128.63
1210.13	2341.37	2138.47
1211.46	2327.22	2142.82
1212.79	2316.67	2142.5
1214.13	2310.69	2139.49
1215.46	2309.05	2134.43
1216.79	2313.12	2128.04
1218.13	2321.55	2122.33
1219.46	2334.07	2120.24
1220.79	2350.78	2122.01
1222.12	2369.48	2130.07
1223.46	2384.89	2144.94
1224.79	2396.7	2166.64
1226.12	2404.28	2195.22
1227.45	2405.27	2230.83
1228.79	2396.67	2272.3
1230.12	2377.59	2317.78
1231.45	2346.38	2363.72
1232.79	2304.67	2407.53
1234.12	2252.51	2448.22
1235.45	2190.68	2486.18
1236.78	2121.43	2518.57
1238.12	2047.54	2544.27
1239.45	1973.43	2564.71
1240.78	1905.88	2579.31
1242.11	1853.66	2588
1243.45	1822.27	2592.88
1244.78	1819.16	2594.63
1246.11	1845.66	2594.54
1247.45	1897.05	2592.99
1248.78	1963.15	2592.11
1250.11	2036.93	2591.64
1251.44	2112.44	2592.64
1252.78	2188.1	2596.06
1254.11	2261.71	2602.37
1255.44	2331.78	2610.61
1256.77	2393.94	2622.24
1258.11	2447.14	2635.05
1259.44	2489.66	2648.26
1260.77	2520.49	2662.53
1262.11	2538.44	2678.26
1263.44	2544.17	2692.08
1264.77	2535.41	2702.67
1266.1	2513.28	2707.09
1267.44	2477.61	2704.73
1268.77	2429.08	2694.42
1270.1	2369.28	2676.34
1271.43	2301.55	2647.53
1272.77	2231.07	2608.43
1274.1	2162.56	2558.58
1275.43	2105.34	2497.29
1276.77	2066.86	2424.43
1278.1	2053.53	2342.32
1279.43	2073.51	2253.29
1280.76	2121.93	2159.34
1282.1	2189.03	2066.17
1283.43	2267.32	1977.36
1284.76	2351.87	1898.87
1286.1	2440.26	1834.61
1287.43	2529.18	1790.98
1288.76	2618.29	1769.15
1290.09	2705.65	1768.97
1291.43	2791.12	1789.57
1292.76	2871.88	1830.8
1294.09	2945.2	1890.15
1295.42	3010.18	1965.78
1296.76	3067.49	2053.26
1298.09	3116.33	2148.73
1299.42	3155.06	2246.57
1300.76	3183.04	2342.49
1302.09	3200.97	2432.03
1303.42	3209.1	2513.08
1304.75	3207.83	2581.8
1306.09	3197.15	2637.29
1307.42	3178.29	2676.99
1308.75	3153.8	2701.03
1310.08	3127.56	2706.39
1311.42	3098.48	2693.82
1312.75	3072.46	2662.35
1314.08	3048.75	2612.66
1315.42	3035.42	2544.66
1316.75	3029.61	2461.54
1318.08	3032.67	2366.03
1319.41	3043.33	2263.5
1320.75	3059.13	2160.56
1322.08	3078.73	2063.78
1323.41	3098.56	1981.1
1324.74	3116.39	1917.36
1326.08	3129.17	1878.41
1327.41	3136.91	1863.1
1328.74	3133.1	1866.89
1330.08	3115.79	1883.77
1331.41	3087.83	1910.25
1332.74	3049.05	1941.66
1334.07	3002.83	1974.36
1335.41	2955.24	2005.65
1336.74	2909.9	2035.25
1338.07	2865.32	2060.61
1339.4	2823.58	2081.91
1340.74	2787.6	2097.27
1342.07	2760.45	2107.71
1343.4	2743.4	2113.01
1344.74	2739.84	2113.99
1346.07	2749.05	2110.6
1347.4	2771.92	2106.21
1348.73	2808.72	2100.7
1350.07	2858.88	2095.08
1351.4	2919.41	2091.49
1352.73	2988.77	2092.25
1354.06	3063.28	2097.05
1355.4	3139.49	2108.14
1356.73	3214.39	2124.84
1358.06	3285.7	2146.51
1359.4	3349.83	2171.32
1360.73	3404.81	2197.84
1362.06	3449.72	2224.77
1363.39	3485.2	2248.65
1364.73	3508.97	2269.49
1366.06	3522.23	2283.98
1367.39	3524.91	2291.76
1368.73	3518.53	2290.73
1370.06	3503.34	2281.81
1371.39	3484.48	2263.66
1372.72	3466.03	2238.41
1374.06	3453.36	2207.15
1375.39	3451.15	2174.17
1376.72	3463.33	2139.83
1378.05	3488.17	2110.9
1379.39	3528.1	2089.26
1380.72	3579.59	2080.04
1382.05	3643.53	2084.06
1383.39	3713.3	2100.54
1384.72	3782.52	2126.28
1386.05	3849.24	2160.28
1387.38	3911.03	2199.93
1388.72	3965.57	2244.95
1390.05	4008.51	2294.87
1391.38	4038.88	2349.15
1392.71	4054.49	2405.56
1394.05	4053.06	2462.49
1395.38	4031.74	2519.96
1396.71	3988.93	2576.43
1398.05	3923.38	2629.51
1399.38	3834.87	2677.79
1400.71	3723.24	2720.54
1402.04	3589.74	2756.18
1403.38	3436.06	2784.18
1404.71	3269.36	2803.94
1406.04	3098.66	2815.84
1407.37	2933.16	2819.02
1408.71	2785.14	2815.21
1410.04	2668.09	2804.26
1411.37	2591.35	2788.93
1412.71	2560	2768.92
1414.04	2570.77	2746.87
1415.37	2599.67	2721.64
1416.7	2634.4	2695.97
1418.04	2672.62	2668.85
1419.37	2708.25	2640.33
1420.7	2738.12	2609.25
1422.03	2760.51	2575.1
1423.37	2772.76	2536.87
1424.7	2774.51	2494.83
1426.03	2765.81	2449.56
1427.37	2747.24	2402.47
1428.7	2718.97	2356.08
1430.03	2684.28	2313.18
1431.36	2644.87	2277.78
1432.7	2604.41	2254.96
1434.03	2565.5	2250.87
1435.36	2534.16	2266.91
1436.69	2512.14	2305.76
1438.03	2503.86	2364.64
1439.36	2511.44	2440.04
1440.69	2534.86	2523.89
1442.03	2571.29	2612.26
1443.36	2619.99	2700.62
1444.69	2677.51	2786.95
1446.02	2741.82	2867.67
1447.36	2809.49	2941.77
1448.69	2877.47	3007.72
1450.02	2943.29	3065.12
1451.35	3004.74	3111.55
1452.69	3056.94	3148.08
1454.02	3097.08	3173.08
1455.35	3122.88	3188.39
1456.69	3129.68	3192.73
1458.02	3110.83	3186.71
1459.35	3066.65	3170.26
1460.68	2998.81	3145.36
1462.02	2910.33	3111.55
1463.35	2797.08	3071.22
1464.68	2663.99	3026.65
1466.02	2517.93	2979.92
1467.35	2365.5	2934.54
1468.68	2212.98	2894.43
1470.01	2070.41	2862.97
1471.35	1946.74	2842.13
1472.68	1858.12	2833.47
1474.01	1814.88	2835.08
1475.34	1815.65	2845.53
1476.68	1857.94	2860.45
1478.01	1952.17	2876.96
1479.34	2083.81	2890.77
1480.68	2237.28	2899.87
1482.01	2404.49	2900.99
1483.34	2578.21	2894.59
1484.67	2754.61	2879.32
1486.01	2929.42	2856.94
1487.34	3098.16	2827.55
1488.67	3258.43	2795.04
1490	3409.88	2760.55
1491.34	3550.65	2729.45
1492.67	3678.83	2702.96
1494	3792.44	2683.85
1495.34	3890.99	2676.15
1496.67	3971.29	2678.41
1498	4035.01	2688.92
1499.33	4083.28	2705.45
1500.67	4118.9	2726.29
1502	4139.21	2750.62
1503.33	4145.23	2777.94
1504.66	4140.32	2806.93
1506	4126.17	2836.43
1507.33	4102.22	2866.36
1508.66	4068.15	2894.2
1510	4022.85	2918.15
1511.33	3966.1	2937.2
1512.66	3897.54	2950.45
1513.99	3817.51	2956.73
1515.33	3728.41	2954.42
1516.66	3636.67	2942.77
1517.99	3544.79	2921.09
1519.32	3451.22	2889.76
1520.66	3357.59	2849.45
1521.99	3266.4	2801.67
1523.32	3178.41	2747.29
1524.66	3096.3	2689.32
1525.99	3022	2627.82
1527.32	2958.1	2566.98
1528.65	2905.26	2508.92
1529.99	2864.07	2456.77
1531.32	2836.25	2412.78
1532.65	2819.29	2381.72
1533.98	2812.72	2367.17
1535.32	2818.19	2370.04
1536.65	2834.31	2391.68
1537.98	2858.96	2432.98
1539.32	2892	2491.6
1540.65	2933.03	2563.06
1541.98	2981.17	2644.48
1543.31	3035.09	2732.44
1544.65	3095.26	2821.84
1545.98	3159.87	2911.8
1547.31	3227.24	2999.41
1548.65	3294.92	3080.68
1549.98	3360.56	3153.4
1551.31	3422.33	3216.94
1552.64	3479.56	3269.04
1553.98	3530.15	3308.16
1555.31	3573.22	3334.93
1556.64	3607.5	3347.03
1557.97	3632.66	3344.62
1559.31	3647.81	3326.63
1560.64	3651.51	3294.71
1561.97	3644.22	3247.27
1563.31	3625.58	3186.3
1564.64	3596.05	3111.95
1565.97	3557.07	3027.22
1567.3	3509.03	2933.09
1568.64	3454.65	2835.72
1569.97	3397.46	2733.13
1571.3	3340.04	2632.2
1572.63	3286.56	2535.57
1573.97	3241.93	2446.8
1575.3	3210.32	2367.35
1576.63	3192.38	2300.23
1577.97	3192.36	2247.37
1579.3	3209.74	2209.74
1580.63	3244.85	2187.06
1581.96	3295.63	2176.42
1583.3	3359.2	2174.16
1584.63	3430.46	2175.72
1585.96	3506	2176.98
1587.29	3581.18	2171.24
1588.63	3653.31	2157.02
1589.96	3717.95	2132.47
1591.29	3776.63	2097.47
1592.63	3828.07	2052.59
1593.96	3873.12	2002.36
1595.29	3909.53	1951.95
1596.62	3939.03	1908.35
1597.96	3959.76	1879.75
1599.29	3971.97	1875.66
1600.62	3976.8	1901
1601.95	3976.37	1957.58
1603.29	3971.22	2040.4
1604.62	3962.59	2140.33
1605.95	3950.98	2250.51
1607.29	3937.22	2364.42
1608.62	3923.31	2478.97
1609.95	3908.66	2592.9
1611.28	3894.28	2704.71
1612.62	3879.51	2811.52
1613.95	3863.78	2911.95
1615.28	3844.85	3006.51
1616.61	3821.53	3093.26
1617.95	3791.47	3171.27
1619.28	3754.93	3240.99
1620.61	3711.13	3302.95
1621.95	3661.39	3355.53
1623.28	3604.93	3399.2
1624.61	3543.88	3434.7
1625.94	3478.32	3461.22
1627.28	3411.08	3478.87
1628.61	3344.28	3488.54
1629.94	3282.1	3490.08
1631.27	3227.19	3483.03
1632.61	3182.73	3467.74
1633.94	3152.06	3444.29
1635.27	3135	3412.55
1636.61	3131.08	3374.3
1637.94	3142.7	3329.94
1639.27	3166.66	3281.04
1640.6	3200.1	3230.29
1641.94	3240.81	3181.37
1643.27	3284.28	3138.01
1644.6	3330.24	3104.49
1645.94	3375.99	3085.79
1647.27	3420.58	3085.17
1648.6	3461.47	3103.17
1649.93	3497.97	3137.74
1651.27	3528.2	3185.17
1652.6	3552.08	3242.25
1653.93	3567.37	3304.42
1655.26	3575.51	3367.8
1656.6	3574.76	3430.14
1657.93	3564.6	3488.93
1659.26	3544.03	3543.64
1660.6	3513.83	3591.04
1661.93	3472.14	3630.61
1663.26	3419.56	3661.62
1664.59	3355.72	3682.86
1665.93	3281.08	3694.21
1667.26	3197.5	3694.44
1668.59	3106.76	3683.46
1669.92	3010.91	3660.65
1671.26	2912.99	3626.9
1672.59	2815.46	3582.52
1673.92	2721.46	3527.96
1675.26	2634.46	3466.21
1676.59	2557.85	3397.84
1677.92	2498.88	3326.25
1679.25	2455.51	3253.59
1680.59	2423.79	3183.39
1681.92	2403.85	3116.99
1683.25	2403.55	3055.95
1684.58	2423.07	2999.87
1685.92	2461.24	2948.81
1687.25	2514.98	2902.64
1688.58	2581.45	2860.46
1689.92	2657.86	2819.49
1691.25	2741.6	2779.78
1692.58	2827.34	2740.04
1693.91	2912.78	2701.22
1695.25	2996.35	2662.89
1696.58	3075.17	2626.6
1697.91	3146.43	2593.3
1699.24	3210.07	2562.21
1700.58	3263.69	2532.42
1701.91	3304.89	2503.97
1703.24	3333.19	2476.37
1704.58	3349.55	2446.86
1705.91	3356.01	2413.26
1707.24	3351.17	2372.18
1708.57	3337.76	2322.25
1709.91	3314.47	2262.32
1711.24	3282.92	2192.65
1712.57	3244.61	2114.3
1713.9	3201.16	2031.72
1715.24	3155.43	1949.42
1716.57	3110.86	1874.86
1717.9	3069.71	1815.78
1719.24	3035.36	1781.64
1720.57	3009.87	1779.88
1721.9	2997.18	1812.58
1723.23	2994.18	1869.81
1724.57	3001.56	1934.13
1725.9	3016.43	1996.3
1727.23	3037.17	2053.63
1728.57	3060.85	2102.93
1729.9	3085.66	2140.67
1731.23	3108.83	2165.91
1732.56	3129.98	2177.83
1733.9	3149.07	2175.8
1735.23	3166.05	2160.6
1736.56	3178.93	2135.34
1737.89	3188.64	2102.75
1739.23	3193.35	2066.91
1740.56	3193.2	2031.46
1741.89	3187.77	2001.73
1743.23	3177.29	1982.16
1744.56	3164.64	1979.14
1745.89	3148.65	1992.56
1747.22	3128.8	2021.97
1748.56	3103.71	2063.74
1749.89	3075.01	2112.54
1751.22	3042.69	2163.22
1752.55	3008.13	2212.36
1753.89	2971.84	2256.29
1755.22	2935.65	2293.13
1756.55	2900.65	2321.15
1757.89	2868.81	2340.51
1759.22	2840.87	2350.35
1760.55	2818.27	2352.22
1761.88	2801.27	2346.64
1763.22	2792.75	2336.87
1764.55	2791.7	2324.19
1765.88	2796.68	2311.96
1767.21	2803.62	2303.13
1768.55	2817.32	2298.49
1769.88	2829.88	2299.36
1771.21	2837.92	2305.89
1772.55	2842.39	2316.46
1773.88	2843.2	2329.55
1775.21	2837.4	2345.24
1776.54	2825.44	2360.68
1777.88	2808.95	2374.63
1779.21	2789.88	2386.55
1780.54	2771.39	2397.75
1781.87	2758.12	2408.16
1783.21	2752.2	2418.73
1784.54	2755.87	2429.64
1785.87	2770.87	2443.29
1787.21	2793.12	2459.96
1788.54	2823.65	2482.12
1789.87	2859.12	2510.11
1791.2	2897.08	2545.14
1792.54	2934.18	2586.13
1793.87	2972.79	2633.24
1795.2	3010.72	2684.86
1796.53	3050.16	2740.1
1797.87	3091.07	2795.96
1799.2	3133.92	2852.8
1800.53	3180.02	2908.7
1801.87	3230.64	2962.8
1803.2	3285.83	3013.26
1804.53	3345.87	3059.79
1805.86	3409.49	3101.35
1807.2	3474.19	3136.77
1808.53	3535.97	3164.92
1809.86	3600.15	3186.68
1811.2	3658.83	3201.55
1812.53	3712.04	3208.64
1813.86	3756.63	3208.64
1815.19	3791.13	3201.62
1816.53	3814.23	3188.51
1817.86	3824.53	3168.14
1819.19	3820.49	3140.75
1820.52	3801.99	3106.23
1821.86	3769.49	3067.34
1823.19	3719.7	3021.74
1824.52	3655.09	2971.66
1825.86	3577.21	2915.91
1827.19	3488.82	2858.21
1828.52	3393.8	2797.47
1829.85	3298.34	2734.87
1831.19	3206.93	2671.09
1832.52	3127.36	2608.26
1833.85	3065.59	2544.78
1835.18	3025.89	2483.05
1836.52	3007.68	2423.68
1837.85	3009.76	2367.76
1839.18	3023.92	2317.85
1840.52	3045.42	2278.22
1841.85	3068.27	2253.42
1843.18	3087.36	2246.89
1844.51	3100.75	2263.5
1845.85	3105.78	2303.01
1847.18	3103.79	2366.39
1848.51	3090.19	2448.72
1849.84	3064.76	2546.06
1851.18	3027.79	2650.93
1852.51	2978.6	2760.64
1853.84	2917.15	2871.63
1855.18	2845.15	2981.18
1856.51	2765.03	3085.58
1857.84	2680.01	3183.8
1859.17	2594.25	3274.06
1860.51	2513.31	3354.73
1861.84	2441.9	3424.19
1863.17	2387.15	3483.22
1864.5	2353.89	3529.31
1865.84	2346.1	3562.96
1867.17	2366.26	3582.75
1868.5	2413.73	3589.17
1869.84	2482.98	3582.53
1871.17	2571.26	3567.58
1872.5	2673.16	3544.64
1873.83	2784.63	3516.58
1875.17	2902.41	3486.5
1876.5	3024.28	3457.33
1877.83	3147.9	3431.58
1879.16	3272.29	3412.1
1880.5	3396.86	3401.54
1881.83	3520.21	3399.55
1883.16	3640.81	3406.09
1884.5	3757.61	3420.61
1885.83	3869.26	3441.06
1887.16	3974.27	3465.79
1888.49	4070.77	3493.07
1889.83	4160.33	3518.41
1891.16	4241.16	3538.33
1892.49	4312.15	3551.38
1893.82	4373.18	3555.55
1895.16	4423.94	3550.38
1896.49	4462.36	3535.1
1897.82	4488.21	3507.24
1899.16	4501.86	3466.51
1900.49	4501.94	3412.33
1901.82	4488.94	3345.45
1903.15	4463.91	3266.09
1904.49	4427.53	3177.73
1905.82	4379.18	3084.21
1907.15	4320.95	2991.57
1908.49	4254.5	2905.44
1909.82	4182.91	2836.03
1911.15	4108.53	2789.86
1912.48	4034.96	2774.62
1913.82	3965.34	2792.42
1915.15	3904.18	2840.55
1916.48	3853.53	2909.8
1917.81	3814.75	2990.79
1919.15	3790.62	3077.7
1920.48	3780.73	3166.46
1921.81	3783.4	3254.35
1923.15	3797.25	3339.01
1924.48	3819.76	3417.56
1925.81	3848.26	3487.63
1927.14	3879.7	3549.87
1928.48	3912.8	3601.51
1929.81	3945.56	3641.7
1931.14	3975.52	3668.7
1932.47	4002.08	3682.47
1933.81	4025.58	3680.67
1935.14	4044.8	3664.09
1936.47	4059.16	3631.56
1937.81	4069.36	3583.03
1939.14	4074.99	3515.56
1940.47	4076.75	3430.14
1941.8	4074.08	3324.13
1943.14	4066.31	3196.95
1944.47	4051.73	3046.62
1945.8	4034.14	2872.5
1947.13	4018.32	2674.37
1948.47	4001.27	2453.8
1949.8	3983.92	2212.53
1951.13	3965.71	1953.88
1952.47	3948.06	1684.81
1953.8	3930.87	1415.07
1955.13	3914.67	1156.33
1956.46	3899.13	922.555
1957.8	3883.72	731.045
1959.13	3868.63	596.717
1960.46	3853.22	515.787
1961.79	3835.88	461.098
1963.13	3815.6	438.589
1964.46	3792.64	452.511
1965.79	3766.21	511.298
1967.13	3734.85	619.779
1968.46	3699.46	781.966
1969.79	3658.9	1000.05
1971.12	3612.46	1243.01
1972.46	3560.07	1489.97
1973.79	3503.5	1737.13
1975.12	3443.89	1982.13
1976.45	3382.17	2225.2
1977.79	3321.03	2461.78
1979.12	3261.67	2693.26
1980.45	3209.83	2920.3
1981.79	3170.34	3144.19
1983.12	3148.71	3363.92
1984.45	3150.76	3580.61
1985.78	3181.35	3794.29
1987.12	3241.15	4004.14
1988.45	3329.47	4206.75
1989.78	3441.28	4402.52
1991.12	3575.09	4589.54
1992.45	3726.55	4766.29
1993.78	3887.51	4931.6
1995.11	4050.64	5085.09
1996.45	4214.44	5225.58
1997.78	4376.04	5350.72
1999.11	4530.29	5460.43
2000.44	4674.73	5555.7
2001.78	4807.83	5635.61
2003.11	4929.32	5698.15
2004.44	5037.12	5745.55
2005.78	5131.82	5777.43
2007.11	5213.41	5793.86
2008.44	5280.78	5793.49
2009.77	5333.37	5777.17
2011.11	5371.48	5743.87
2012.44	5394.07	5693
2013.77	5401.24	5624.94
2015.1	5393.05	5539.58
2016.44	5369.44	5436.32
2017.77	5329.14	5315.13
2019.1	5273.6	5176.37
2020.44	5201.84	5016.93
2021.77	5115.39	4836.93
2023.1	5013.91	4638.02
2024.43	4900.47	4419.26
2025.77	4775.46	4181.1
2027.1	4642.78	3927.7
2028.43	4506.37	3660.12
2029.76	4370.36	3382.64
2031.1	4238.67	3102.83
2032.43	4115.49	2831.1
2033.76	4006.27	2577.06
2035.1	3912.75	2353.45
2036.43	3834.3	2175.38
2037.76	3770.35	2055.7
2039.09	3718.69	2001.15
2040.43	3675.81	2008.38
2041.76	3640.35	2058.59
2043.09	3609.68	2135.49
2044.42	3583.29	2232.42
2045.76	3562.38	2345.85
2047.09	3548.91	2470.25
2048.42	3543.19	2603.3
2049.76	3546.14	2740.92
2051.09	3556.66	2879.94
2052.42	3574.29	3016.42
2053.75	3596.99	3149.94
2055.09	3625.01	3276.2
2056.42	3656.76	3392.86
2057.75	3690.48	3498.43
2059.08	3725.11	3592.63
2060.42	3760.7	3675.35
2061.75	3797.65	3745.02
2063.08	3835.38	3802.42
2064.42	3874.09	3847.76
2065.75	3914.06	3880.98
2067.08	3954.99	3902.85
2068.41	3996.17	3913.1
2069.75	4037.39	3912.9
2071.08	4079.38	3903.41
2072.41	4121.83	3884.71
2073.75	4164.48	3858.75
2075.08	4207.71	3825.29
2076.41	4250.31	3786.01
2077.74	4290.19	3740.71
2079.08	4328.64	3691.48
2080.41	4363.57	3637.91
2081.74	4393	3581.94
2083.07	4414.86	3522.3
2084.41	4428.15	3459.59
2085.74	4431.15	3393.54
2087.07	4420.87	3324.94
2088.41	4395.53	3253.53
2089.74	4353.53	3179.94
2091.07	4291.45	3104.34
2092.4	4204.88	3027.37
2093.74	4091.35	2949.24
2095.07	3948.3	2872.89
2096.4	3776.2	2800.09
2097.73	3570.96	2732.48
2099.07	3336.38	2673.65
2100.4	3074.34	2626.61
2101.73	2794.2	2594.2
2103.07	2506.34	2578.52
2104.4	2227.4	2581.31
2105.73	1978.03	2601.37
2107.06	1782.11	2635.78
2108.4	1658.95	2682.15
2109.73	1622.31	2735.48
2111.06	1656.61	2788.65
2112.39	1743.72	2837.65
2113.73	1873.62	2879.03
2115.06	2031.57	2909.42
2116.39	2202.3	2928.06
2117.73	2381.45	2933.32
2119.06	2564.81	2924.84
2120.39	2748.25	2901.88
2121.72	2927.14	2866.44
2123.06	3099.62	2820.27
2124.39	3264.55	2764.89
2125.72	3416.67	2703.99
2127.05	3554.63	2639.78
2128.39	3679.15	2578.38
2129.72	3789.57	2520.16
2131.05	3883.08	2469.5
2132.39	3960.46	2424.01
2133.72	4022.06	2386.34
2135.05	4067.64	2357.75
2136.38	4097.14	2339.14
2137.72	4111.7	2332.47
2139.05	4111.62	2340.87
2140.38	4098.6	2362.84
2141.71	4072.74	2396.84
2143.05	4037.2	2436.34
2144.38	3992.35	2476.9
2145.71	3944.01	2513.4
2147.05	3893.84	2544.57
2148.38	3845.66	2569.84
2149.71	3801.86	2590.35
2151.04	3763.02	2609.03
2152.38	3731.51	2630.86
2153.71	3708.61	2661.47
2155.04	3694.23	2706.64
2156.37	3685.39	2772.74
2157.71	3682.54	2863.67
2159.04	3683.57	2979.94
2160.37	3686.36	3117.23
2161.71	3689.68	3268.81
2163.04	3694.76	3424.77
2164.37	3700.95	3579.07
2165.7	3712.2	3729.36
2167.04	3729.86	3872.37
2168.37	3754.04	4004.52
2169.7	3782.82	4124.17
2171.04	3816.43	4229.57
2172.37	3852.78	4319.92
2173.7	3893.12	4393.43
2175.03	3932.72	4450.38
2176.37	3971.12	4490.65
2177.7	4006.83	4514.89
2179.03	4038.8	4523.91
2180.36	4066.12	4518.32
2181.7	4087.82	4499.49
2183.03	4102.88	4469.11
2184.36	4112.72	4428.87
2185.7	4117.67	4380.76
2187.03	4117.52	4327.22
2188.36	4113.01	4269.26
2189.69	4103.66	4207.06
2191.03	4088.28	4142.13
2192.36	4068.12	4074.51
2193.69	4044.38	4003.98
2195.02	4015.28	3929.66
2196.36	3979.71	3850.99
2197.69	3932.94	3765.49
2199.02	3877.54	3672.04
2200.36	3816.07	3569.18
2201.69	3750.85	3456.18
2203.02	3676.22	3333.22
2204.35	3591.03	3202.03
2205.69	3495.95	3065.45
2207.02	3392.28	2928.27
2208.35	3280.32	2796.9
2209.68	3164.28	2677.79
2211.02	3046.26	2579.24
2212.35	2931.48	2509.27
2213.68	2824.68	2472.98
2215.02	2732.35	2470.77
2216.35	2655.97	2502.66
2217.68	2594.62	2563.67
2219.01	2541.61	2651.18
2220.35	2494.74	2764.38
2221.68	2449.2	2899.66
2223.01	2402.46	3051.33
2224.34	2352.99	3216.75
2225.68	2300.51	3390.73
2227.01	2247.71	3568.17
2228.34	2198.49	3745.86
2229.68	2157.7	3922.49
2231.01	2130.71	4094.51
2232.34	2123.08	4259.06
2233.67	2136.59	4415.27
2235.01	2169.18	4561.09
2236.34	2222.78	4693.98
2237.67	2294.05	4813.77
2239	2378.11	4920.26
2240.34	2473.76	5011.76
2241.67	2578.25	5087.44
2243	2689.84	5147.85
2244.34	2806.5	5192.85
2245.67	2929.35	5222.32
2247	3055.27	5235.1
2248.33	3183.77	5229.66
2249.67	3313.07	5205.59
2251	3441.75	5161.85
2252.33	3567.37	5099.15
2253.67	3689.4	5014.53
2255	3805.92	4907.89
2256.33	3917.66	4777.3
2257.66	4020.5	4622.3
2259	4116.39	4440.7
2260.33	4205.25	4233.2
2261.66	4287.09	3998.95
2262.99	4359.57	3737.95
2264.33	4422.23	3450.07
2265.66	4477.17	3139.55
2266.99	4526.66	2807.94
2268.33	4568.79	2461.45
2269.66	4601.67	2107.62
2270.99	4625.81	1760.54
2272.32	4641.08	1433.11
2273.66	4648.91	1140.65
2274.99	4645.75	900.473
2276.32	4632.72	728.237
2277.65	4608.26	609.679
2278.99	4573.44	509.779
2280.32	4527.68	432.19
2281.65	4473.07	376.159
2282.99	4409.15	344.388
2284.32	4336.2	342.363
2285.65	4251.9	372.923
2286.98	4155.56	443.57
2288.32	4045.92	559.332
2289.65	3924.22	723.337
2290.98	3796.85	937.669
2292.31	3666.33	1170.95
2293.65	3531.82	1398.37
2294.98	3394.55	1617.49
2296.31	3260.64	1825.43
2297.65	3132.39	2022.3
2298.98	3013.38	2207.93
2300.31	2907.13	2380.59
2301.64	2820.41	2542.27
2302.98	2756.41	2693.64
2304.31	2717.43	2835.8
2305.64	2704.87	2968.08
2306.97	2717.04	3090.99
2308.31	2751.26	3202.43
2309.64	2797.37	3301.08
2310.97	2843.86	3385.14
2312.31	2884.31	3455.02
2313.64	2915.13	3509.12
2314.97	2934.65	3545.37
2316.3	2942.96	3563.49
2317.64	2945.07	3563.94
2318.97	2944.32	3546.14
2320.3	2944.29	3511.01
2321.63	2949.25	3460.47
2322.97	2962.87	3395.96
2324.3	2985.68	3321.8
2325.63	3016.94	3243.34
2326.97	3054.43	3165.09
2328.3	3097.27	3093.48
2329.63	3141.65	3036.53
2330.96	3185.87	2997.91
2332.3	3226.41	2981.22
2333.63	3261.8	2987.33
2334.96	3289.9	3015.32
2336.29	3310.68	3060.06
2337.63	3321.74	3118.46
2338.96	3322.83	3183.48
2340.29	3313.74	3252.77
2341.63	3294.08	3322.26
2342.96	3265.62	3389.67
2344.29	3228.54	3450.04
2345.62	3184	3504.08
2346.96	3133.05	3549.3
2348.29	3077.71	3585.52
2349.62	3022.29	3610.19
2350.96	2969.91	3624.79
2352.29	2921.83	3628.39
2353.62	2881.98	3621.03
2354.95	2851.25	3603.2
2356.29	2833.19	3575.34
2357.62	2829.02	3538.36
2358.95	2839.4	3494.06
2360.28	2863.9	3442.85
2361.62	2899.63	3387.36
2362.95	2942.83	3329.99
2364.28	2989.67	3273.62
2365.62	3035.25	3220.74
2366.95	3081.51	3175.33
2368.28	3122.08	3141.35
2369.61	3158.71	3121.22
2370.95	3188.18	3117.31
2372.28	3210.37	3129.44
2373.61	3223.92	3156.04
2374.94	3227.39	3191.63
2376.28	3220.45	3232.75
2377.61	3203.33	3275.14
2378.94	3174.69	3314.19
2380.28	3134.76	3346.15
2381.61	3084.35	3369.83
2382.94	3024.31	3381.48
2384.27	2957.77	3381.23
2385.61	2887.28	3369.13
2386.94	2817.06	3345.74
2388.27	2751.42	3311.75
2389.6	2695.14	3270.4
2390.94	2652.25	3225.47
2392.27	2625.53	3180.4
2393.6	2618.72	3137.98
2394.94	2631.92	3101.83
2396.27	2663.48	3072.16
2397.6	2709.48	3046.05
2398.93	2765.18	3019.88
2400.27	2825.57	2989.1
2401.6	2890.45	2948.68
2402.93	2960.5	2893.57
2404.26	3027.67	2820.63
2405.6	3091.53	2725.58
2406.93	3152.01	2605.86
2408.26	3205.99	2460.28
2409.6	3252.18	2288.73
2410.93	3290.52	2092.99
2412.26	3320.62	1879.11
2413.59	3342.42	1657.47
2414.93	3355.45	1442.26
2416.26	3361.35	1252.84
2417.59	3360.86	1113.72
2418.92	3356.71	1044.54
2420.26	3350.15	1062.95
2421.59	3343.48	1151.82
2422.92	3337.41	1258.88
2424.26	3333.54	1381.23
2425.59	3333.88	1516.93
2426.92	3338.37	1660.07
2428.25	3345.34	1807.13
2429.59	3355.46	1954.77
2430.92	3365.18	2098.97
2432.25	3372.61	2234.78
2433.59	3377.39	2360.97
2434.92	3377.68	2475.17
2436.25	3373.3	2573.69
2437.58	3362.94	2655.41
2438.92	3346.89	2718.66
2440.25	3325.95	2760.85
2441.58	3300.79	2779.64
2442.91	3272.32	2775.9
2444.25	3242.01	2748.78
2445.58	3211.46	2699.01
2446.91	3182.34	2628.33
2448.25	3156.73	2540.38
2449.58	3136.73	2439.17
2450.91	3122	2334.1
2452.24	3114.66	2234.61
2453.58	3115.33	2153.44
2454.91	3124.2	2103.5
2456.24	3141.69	2096.83
2457.57	3168.72	2140.01
2458.91	3202.63	2233.73
2460.24	3245.4	2368.54
2461.57	3294.65	2522.47
2462.91	3348.99	2687.85
2464.24	3405.76	2858.64
2465.57	3463.8	3028.8
2466.9	3521.11	3194.4
2468.24	3575.88	3353.46
2469.57	3626.96	3502.87
2470.9	3673.82	3638.71
2472.23	3714.61	3760.47
2473.57	3749.09	3867.75
2474.9	3776.23	3958.33
2476.23	3796.76	4032.01
2477.57	3811.04	4088.5
2478.9	3820.69	4127.08
2480.23	3827.22	4147.85
2481.56	3832.21	4151.55
2482.9	3837.95	4136.9
2484.23	3846.42	4104.6
2485.56	3859.76	4054.14
2486.89	3880.24	3986.32
2488.23	3908.23	3901.47
2489.56	3943.02	3801.52
2490.89	3983.64	3686.67
2492.23	4028.58	3558.33
2493.56	4076.72	3418.03
2494.89	4126.24	3266.78
2496.22	4175.7	3105.75
2497.56	4222.18	2936.79
2498.89	4264.53	2761.77
2500.22	4301.97	2583.67
2501.55	4332.6	2406.58
2502.89	4354.56	2235.77
2504.22	4367.59	2077.26
2505.55	4369.34	1940.3
2506.89	4360.05	1831.75
2508.22	4339	1757.39
2509.55	4306.71	1718.94
2510.88	4262.38	1714.88
2512.22	4206.22	1746.67
2513.55	4138.14	1803.75
2514.88	4058.39	1889.06
2516.22	3968.56	1997.35
2517.55	3869.75	2126.49
2518.88	3764.46	2273.94
2520.21	3653.67	2437.49
2521.55	3541.71	2613.54
2522.88	3430.89	2799.29
2524.21	3324.48	2988.95
2525.54	3227.43	3180.11
2526.88	3145.71	3369.4
2528.21	3079.92	3554.76
2529.54	3032.23	3731.75
2530.88	3004.36	3900.7
2532.21	2991.23	4060.92
2533.54	2991.27	4210.32
2534.87	3000.42	4346.78
2536.21	3013.75	4472.39
2537.54	3030.78	4586
2538.87	3048.82	4687.52
2540.2	3067.18	4776.67
2541.54	3085.15	4855.82
2542.87	3104.87	4923.68
2544.2	3127.75	4978.72
2545.54	3155.14	5023.95
2546.87	3188.43	5062.28
2548.2	3228.98	5094.94
2549.53	3277.36	5120.25
2550.87	3333.51	5137.63
2552.2	3396.07	5145.78
2553.53	3463.29	5147.46
2554.86	3531.07	5143.95
2556.2	3597.65	5135.96
2557.53	3661.52	5123.66
2558.86	3722.28	5108.56
2560.2	3777.57	5091.48
2561.53	3826.45	5073.96
2562.86	3869.48	5054.28
2564.19	3905.1	5033.52
2565.53	3934	5010.76
2566.86	3954.94	4986.46
2568.19	3968.87	4960
2569.52	3973.36	4930.46
2570.86	3972.47	4896.2
2572.19	3967.5	4856.39
2573.52	3958.2	4809.29
2574.86	3942.95	4753.27
2576.19	3922.41	4686.75
2577.52	3895.29	4607.95
2578.85	3861.27	4514.69
2580.19	3818.52	4404.41
2581.52	3766.65	4275.13
2582.85	3704.61	4124.62
2584.18	3630.95	3953.85
2585.52	3545.91	3762.13
2586.85	3448.32	3554.07
2588.18	3339.06	3338.04
2589.52	3219.63	3124.31
2590.85	3094.69	2927.01
2592.18	2968.22	2765.58
2593.51	2847.54	2658.73
2594.85	2739.92	2621.06
2596.18	2656.89	2661.87
2597.51	2609.07	2746.88
2598.84	2606.71	2841.45
2600.18	2652.17	2940.92
2601.51	2740.35	3040.31
2602.84	2859.46	3135.4
2604.18	2993.39	3223.3
2605.51	3133.66	3302.89
2606.84	3276.49	3371.53
2608.17	3415.25	3427.49
2609.51	3542.98	3469.68
2610.84	3653.68	3498.25
2612.17	3751.67	3512.91
2613.51	3835.9	3513.58
2614.84	3907.28	3502.3
2616.17	3966.53	3479.84
2617.5	4011.8	3446.71
2618.84	4038.47	3404.52
2620.17	4047.6	3355.48
2621.5	4037.91	3301.97
2622.83	4009.72	3246.52
2624.17	3961.5	3191.1
2625.5	3894.76	3139.41
2626.83	3809.23	3094.22
2628.17	3706.15	3058.56
2629.5	3588.53	3034.16
2630.83	3458.47	3022.16
2632.16	3321.89	3022.29
2633.5	3186.36	3033.4
2634.83	3061.46	3053.25
2636.16	2954.77	3078.18
2637.49	2879.53	3105.9
2638.83	2841.58	3134.15
2640.16	2844.77	3161
2641.49	2883.82	3183.9
2642.83	2950.38	3201.31
2644.16	3029.82	3211.68
2645.49	3118.52	3213.77
2646.82	3211.62	3205.93
2648.16	3306.01	3188.24
2649.49	3398.89	3160.41
2650.82	3490.03	3122.76
2652.15	3576.75	3074.87
2653.49	3657.12	3019.22
2654.82	3730.82	2955.84
2656.15	3797.67	2887.97
2657.49	3856.43	2818.31
2658.82	3907.83	2751.48
2660.15	3952.86	2690.25
[truncated: 2,504 more rows]
