# Supplementary material for: Ionogel thin films as a compatibilizing pretreatment for electrospray deposition
Source: Royal Society of Chemistry journal article supplement (doi:10.1039/d5lp00359h), 2026-01-01
Supplement: d5lp00359h1.zip [file F data - aligned.xlsx]

## Sheet: Sheet1
Lateral	Height Data	Height Data	Height Data	Height Data	Height Data	Mean	Standard Deviation
µm	nm	nm	nm	nm	nm	nm	nm
	G1	G2	G3	G4	G5	Statistics On Rows of B"Height Data":F"Height Data"	Statistics On Rows of B"Height Data":F"Height Data"
0	92.1312	14.3453	317.645	-4.5388	0.927997	84.1021	136.242
1.99867	80.3175	18.5352	318.198	-3.99778	1.50975	82.9126	135.73
3.99734	68.3672	24.1352	319.228	-3.8215	0.980273	81.7778	135.776
5.996	62.6831	31.6357	320.835	-4.55951	0.03928	82.1267	136.163
7.99467	58.0114	41.3166	322.325	-5.23751	-1.28975	83.0251	136.5
9.99334	46.3157	53.6528	324.374	-5.37444	-2.16755	83.36	137.415
11.992	28.3149	68.6119	326.033	-5.19752	-3.28908	82.8945	139.182
13.9907	12.5192	84.5605	327.859	-5.27608	-4.1842	83.0957	141.704
15.9893	3.6284	97.2809	328.296	-5.24174	-4.98813	83.7952	143.352
17.988	-0.719747	104.135	327.62	-5.08281	-4.84196	84.2219	143.842
19.9867	-5.27553	112.603	327.286	-4.65778	-4.26462	85.1382	144.586
21.9853	-8.9097	123.77	328.524	-4.46368	-3.25878	87.1324	146.114
23.984	-12.0858	137.375	331.258	-4.36371	-2.37077	89.9626	148.583
25.9827	-13.4312	153.516	336.016	-4.448	-1.33472	94.0636	152.016
27.9813	-12.6034	170.535	342.147	-3.74789	-0.745105	99.1172	155.884
29.98	-10.2895	187.38	349.9	-3.09537	-0.603621	104.658	160.383
31.9787	-4.75644	198.374	357.065	-1.56762	-1.07116	109.609	163.404
33.9773	3.72956	193.46	360.987	-0.27936	-1.16469	111.346	162.606
35.976	15.1722	172.25	360.299	1.27696	-1.47461	109.505	157.926
37.9747	30.1967	141.406	352.884	3.09374	-1.72533	105.171	150.119
39.9734	47.7733	107.14	342.31	4.82624	-2.2348	99.963	142.305
41.972	66.8107	71.2072	332.014	6.3318	-1.73254	94.9262	136.707
43.9707	82.1166	45.971	322.673	7.55863	-1.38931	91.386	133.488
45.9694	81.1965	29.7539	316.995	8.74302	-0.688662	87.1999	132.308
47.968	72.9018	17.566	311.58	9.77321	0.0754196	82.3793	131.215
49.9667	64.2388	7.37782	307.133	11.4563	1.45703	78.3325	130.35
51.9654	54.1228	-1.26081	303.077	13.519	2.71931	74.4355	129.686
53.964	54.4735	-7.72352	299.783	15.633	4.49901	73.333	128.718
55.9627	59.6463	-12.3148	296.663	16.7814	6.60496	73.4762	127.524
57.9614	67.014	-15.1926	294.19	16.8548	9.07152	74.3874	126.46
59.96	73.7568	-16.5548	292.379	17.396	11.3202	75.6595	125.508
61.9587	75.7443	-16.0283	290.746	18.6163	11.864	76.1885	124.49
63.9574	82.0805	-13.7485	289.425	21.6261	11.1402	78.1046	123.271
65.956	87.8052	-9.88463	289.712	27.4323	10.4169	81.0963	122.187
67.9547	91.5962	-4.84598	293.771	35.8239	9.38918	85.1468	122.307
69.9534	93.6377	-0.380617	300.048	46.4655	8.55689	89.6656	123.319
71.952	96.5427	3.58691	310.034	60.1835	8.44837	95.7591	125.796
73.9507	98.6967	5.15052	324.513	76.6146	8.56434	102.708	130.647
75.9494	100.171	5.78938	344.345	94.9876	9.30148	110.919	138.054
77.948	102.031	7.31513	368.288	113.419	9.81168	120.173	147.354
79.9467	103.805	8.32329	396.914	126.75	10.6985	129.298	158.883
81.9454	105.646	8.91623	428.821	117.653	12.0704	134.621	172.12
83.944	106.687	8.50522	461.509	98.2334	14.2389	137.835	186.618
85.9427	108.565	8.48108	474.229	73.8245	16.552	136.33	193.356
87.9414	110.138	10.0663	454.237	63.0867	19.4382	131.393	184.797
89.94	112.076	13.349	437.598	58.321	22.8371	128.836	176.89
91.9387	115.329	19.0852	424.031	53.8062	26.7976	127.81	169.856
93.9374	119.197	28.3847	412.779	49.0271	31.3727	128.152	163.304
95.936	124.296	41.5986	408.155	45.1804	35.5338	130.953	159.163
97.9347	130.135	58.2587	405.149	41.9243	40.5826	135.21	155.299
99.9334	137.672	77.8108	398.786	38.6813	45.6482	139.72	150.009
101.932	146.114	98.4971	389.556	36.5273	50.6425	144.267	143.734
103.931	154.556	120.383	381.04	34.3988	56.2141	149.318	138.234
105.929	159.718	130.5	374.465	33.3402	61.1986	151.844	134.478
107.928	156.413	125.179	367.839	32.8566	65.2828	149.514	131.348
109.927	149.669	110.361	361.748	32.7871	68.0591	144.525	129.143
111.925	141.32	90.4097	357.047	33.3889	69.4139	138.316	128.359
113.924	130.372	68.2069	353.768	33.8806	69.2051	131.087	129.248
115.923	114.746	51.176	351.265	34.5672	68.664	124.083	130.478
117.921	101.66	45.1207	350.336	34.2169	69.816	120.23	131.22
119.92	87.8579	40.166	350.109	32.3875	71.727	116.449	132.571
121.919	80.868	36.4872	350.053	28.7837	74.0424	114.047	133.871
123.917	76.5538	34.0237	349.762	26.8013	78.3194	113.092	134.401
125.916	73.4984	30.9869	348.882	25.5761	82.0811	112.205	134.65
127.915	70.7814	27.2616	348.154	25.169	85.4292	111.359	134.992
129.913	68.6807	25.436	348.345	24.6811	88.1426	111.057	135.479
131.912	67.7751	23.9996	350.279	24.7734	88.6365	111.093	136.59
133.911	68.0078	23.5155	353.686	25.2732	87.3839	111.573	138.115
135.909	68.1497	21.0088	360.555	26.1749	86.1918	112.416	141.433
137.908	68.8946	19.7623	372.352	28.2431	83.5802	114.567	146.577
139.907	67.4405	19.7508	389.66	31.9185	80.3844	117.831	153.975
141.905	68.0053	19.6429	413.647	37.1852	78.0169	123.299	163.989
143.904	71.7633	18.7864	443.443	44.6088	77.2007	131.16	176.124
145.903	77.3358	19.5624	476.528	53.877	77.4059	140.942	189.086
147.901	83.9784	20.7436	510.123	64.614	78.0007	151.492	202.001
149.9	91.9729	21.6694	538.913	76.8682	79.1561	161.716	212.585
151.899	94.5224	21.7081	545.777	91.0241	80.0669	166.62	213.988
153.897	93.8965	23.4122	536.715	105.273	80.9921	168.058	208.478
155.896	97.7802	26.0626	531.134	111.927	82.5431	169.889	204.556
157.895	103.088	30.8966	528.757	105.961	85.3703	170.815	202.357
159.893	111.101	36.8377	526.144	92.6119	88.0424	170.947	200.463
161.892	115.491	43.0473	523.174	78.9544	91.6871	170.471	198.898
163.891	123.356	49.5769	520.166	67.6028	97.0615	171.553	196.905
165.889	132.264	57.3987	517.863	57.4308	105.464	174.084	194.849
167.888	137.569	64.8991	515.945	48.7707	116.642	176.765	193.061
169.887	141.574	73.9942	513.344	43.2061	130.37	180.498	190.398
171.885	144.79	83.5347	511.042	38.4037	146.646	184.883	187.868
173.884	147.436	94.6653	509.462	34.9982	163.085	189.929	185.544
175.883	150.341	106.352	508.301	33.4505	172.363	194.162	183.451
177.881	153.451	118.132	506.808	34.4206	179.678	198.498	180.844
179.88	157.089	128.897	505.749	38.3565	185.543	203.127	177.952
181.879	161.006	138.678	505.313	45.7635	188.37	207.826	174.725
183.877	165.872	147.417	505.594	55.1903	185.29	211.873	171.609
185.876	170.283	157.698	506.591	67.4977	178.254	216.065	168.382
187.875	173.578	167.435	509.429	83.9161	176.702	222.212	165.118
189.873	178.344	177.81	514.613	104.368	173.686	229.764	162.289
191.872	183.344	188.164	523.113	125.556	171.365	238.309	161.124
193.871	188.056	195.996	534.308	143.233	170.564	246.431	162.196
195.869	189.02	209.406	548.327	141.008	171.855	251.923	167.581
197.868	185.291	221.159	564.464	124.79	172.048	253.551	177.199
199.867	180.346	234.116	581.862	101.294	172.49	254.022	189.26
201.865	172.936	245.862	597.167	85.0827	173.27	254.864	199.655
203.864	166.788	252.289	604.048	91.3456	172.921	257.478	201.936
205.863	162.135	257.64	601.935	106.416	167.82	259.19	199.113
207.861	170.668	262.057	600.018	126.85	164.2	264.759	193.901
209.86	174.07	268.585	597.9	153.021	161.357	270.986	188.551
211.859	175.783	279.304	595.637	181.947	159.627	278.46	183.426
213.857	179.638	299.101	595.723	199.689	158.536	286.537	181.044
215.856	183.461	322.539	594.829	196.351	159.449	291.326	181.063
217.855	191.479	336.714	594.449	189.38	159.803	294.365	181.355
219.853	190.887	330.847	594.546	180.467	161.107	291.571	182.235
221.852	181.169	335.039	595.222	174.409	161.325	289.433	185.034
223.851	171.513	340.569	597.496	168.998	159.712	287.658	188.904
225.849	159.547	337.728	600.796	166.209	157.151	284.286	192.808
227.848	156.835	326.419	604.598	166.889	156.687	282.286	194.076
229.847	158.126	314.618	608.883	166.899	158.501	281.406	194.782
231.845	162.511	303.384	613.792	162.518	160.787	280.598	196.074
233.844	159.427	296.886	620.352	158.135	161.902	279.34	199.661
235.843	148.47	292.446	628.49	154.191	162.666	277.253	205.218
237.841	141.151	289.368	637.47	149.547	163.877	276.283	210.704
239.84	141.988	287.983	650.265	145.718	165.151	278.221	216.456
241.839	155.029	285.484	671.348	141.833	166.766	284.092	223.958
243.837	171.225	283.864	702.006	136.664	168.21	292.394	235.696
245.836	179.582	282.948	740.977	129.762	169.798	300.613	252.579
247.835	173.143	283.942	788.689	120.253	170.469	307.299	275.676
249.833	162.728	283.476	845.339	111.58	172.615	315.148	302.941
251.832	152.026	280.211	897.988	102.506	176.257	321.798	328.564
253.831	142.219	284.079	930.344	92.3183	182.207	326.233	344.981
255.829	147.977	289.689	952.581	78.9708	190.211	331.886	355.283
257.828	164.395	296.012	987.269	67.3428	201.112	343.226	369.225
259.827	189.044	299.872	1019.17	58.361	213.053	355.901	380.739
261.825	212.924	298.498	1035.57	51.157	224.657	364.56	385.811
263.824	229.046	295.993	1039.63	44.8876	233.766	368.665	386.653
265.823	240.532	293.294	1067.81	40.5571	244.042	377.246	398.031
267.821	250.812	294.505	1094.25	38.1183	254.642	386.465	408.208
269.82	265.471	297.841	1069.14	37.1157	265.694	387.053	395.338
271.819	281.352	302.827	999.439	37.8694	280.072	380.312	362.777
273.817	297.337	309.562	917.596	39.8219	301.19	373.101	324.999
275.816	315.925	318.893	851.059	43.0521	313.259	368.438	294.557
277.815	331.143	333.138	812.7	46.8506	333.564	371.479	275.95
279.813	341.056	352.767	797.336	46.8947	384.972	384.605	268.005
281.812	350.112	380.091	802.079	47.9868	450.672	406.188	269.649
283.811	358.982	413.615	810.307	50.1432	533.236	433.257	276.062
285.809	366.15	451.527	792.446	53.422	631.352	458.979	280.206
287.808	377.432	489.173	739.657	57.8826	724.549	477.739	281.064
289.807	393.269	505.746	672.811	64.3922	774.117	482.067	275.941
291.805	415.16	510.049	605.615	73.0899	785.177	477.818	264.372
293.804	446.264	514.247	562.798	84.0842	817.382	484.955	264.395
295.803	484.5	532.95	547.484	97.319	864.797	505.41	273.25
297.801	518.526	553.275	522.483	111.998	906.644	522.585	281.532
299.8	556.341	577.274	483.018	128.133	948.223	538.598	292.05
301.799	601.362	599.487	434.931	147.118	983.788	553.337	303.627
303.797	657.452	610.812	388.476	165.463	973.443	559.129	303.352
305.796	721.592	622.719	362.418	176.305	930.359	562.679	297.252
307.795	794.028	643.362	349.328	182.507	893.364	572.518	299.562
309.793	873.502	659.083	335.7	187.709	850.143	581.227	307.791
311.792	963.722	666.87	323.128	191.903	801.818	589.488	324.093
313.791	1067.07	695.771	311.926	196.903	795.603	613.454	357.125
315.789	1180.85	733.682	304.343	203.646	798.022	644.109	396.628
317.788	1291.28	766.874	302.895	211.313	762.967	667.066	432.763
319.787	1410.4	800.814	310.263	216.179	706.43	688.817	474.401
321.785	1532.79	852.566	326.48	215.497	648.262	715.119	522.64
323.784	1656.81	901.429	353.298	202.531	579.026	738.62	576.828
325.783	1787.31	955.922	386.025	182.028	513.651	764.987	638.008
327.781	1923.07	996.217	419.579	175.191	481.489	799.11	695.763
329.78	2047.49	1001.52	452.631	171.757	466.405	827.96	744.911
331.779	2165.27	1016.37	483.351	168.646	459.547	858.637	791.891
333.777	2286.6	1035	499.934	167.492	471.857	892.178	839.72
335.776	2416.82	1058.51	500.159	167.592	507.562	930.129	890.453
337.775	2545.8	1095.51	496.2	168.076	552.32	971.582	940.867
339.773	2675.83	1143.96	485.633	169.634	591.706	1013.35	993.609
341.772	2809.66	1214.85	477.28	171.415	637.521	1062.14	1047.96
343.771	2938.05	1306.56	473.862	176.071	683.984	1115.7	1099.84
345.769	3053.02	1393.79	475.869	182.522	739.12	1168.86	1144.38
347.768	3160.42	1466.55	484.385	191.992	783.832	1217.44	1184.71
349.767	3265.07	1515.24	500.783	208.076	790.148	1255.86	1223.63
351.765	3366.66	1555.7	533.519	230.257	777.631	1292.75	1259.06
353.764	3467.43	1591.79	577.542	254.53	759.371	1330.13	1292.83
355.763	3573.49	1630.75	613.42	277.091	734.246	1365.8	1331.76
357.761	3693.5	1678.27	642.023	296.84	709.763	1404.08	1378.9
359.76	3810.18	1740.08	671.975	292.14	704.659	1443.81	1427.92
361.759	3918.46	1832.23	707.22	267.826	704.968	1486.14	1477.94
363.757	3999.48	1930.76	737.072	242.846	706.707	1523.37	1518.39
365.756	4051.73	2028	775.518	233.872	717.445	1561.31	1542.05
367.755	4098.14	2130.61	805.38	257.829	740.155	1606.42	1556.78
369.753	4151.08	2238.92	798.193	292.603	770.5	1650.26	1576.69
371.752	4218.07	2338.57	761.43	338.98	801.275	1691.67	1603.83
373.751	4302.46	2428.86	708.897	395.535	837.762	1734.7	1637.48
375.75	4385.46	2520.9	654.346	459.594	884.974	1781.05	1669.5
377.748	4461.58	2618.1	640.897	500.822	954.646	1835.21	1695.07
379.747	4523.36	2719.07	648.474	514.078	1062.4	1893.48	1713.28
381.746	4560.79	2812.77	687.78	513.098	1216.74	1958.24	1714.34
383.744	4579	2906.98	736.686	501.775	1378.13	2020.51	1710.2
385.743	4591.58	3008.9	758.913	494.742	1540.59	2078.94	1711.73
387.742	4608.2	3122.95	756.634	500.444	1709.98	2139.64	1720.82
389.74	4629.84	3244.6	739.026	515.041	1876.75	2201.05	1737.34
391.739	4678.25	3350.83	724.184	532.703	2056.49	2268.49	1762.19
393.738	4730.35	3447.66	726.253	556.905	2257.23	2343.68	1784.03
395.736	4785.87	3538.08	759.228	596.78	2457.07	2427.41	1797.97
397.735	4837.59	3619.61	818.715	667.083	2659.14	2520.43	1797.74
399.734	4885.14	3689.42	906.156	796.092	2859.48	2627.26	1774.51
401.732	4927.31	3762.11	1019.01	1005.9	3068.94	2756.65	1725.17
403.731	4962.96	3851.34	1109.86	1271.48	3285.75	2896.28	1670.8
405.73	4990.02	3966.19	1195.66	1560.75	3500.43	3042.61	1617.26
407.728	4992.72	4103.04	1287.68	1880.63	3704.87	3193.79	1555.78
409.727	4972.29	4251.71	1404.53	2217.18	3878.57	3344.86	1482.59
411.726	4928.92	4383.99	1568.92	2574.59	4026.59	3496.6	1386.18
413.724	4868.38	4480.98	1762.79	2934.71	4178.21	3645.01	1277.4
415.723	4796.26	4554.41	1973.92	3300.93	4354.48	3796	1167.55
417.722	4719.61	4613.01	2204.74	3665.19	4541.95	3948.9	1061.76
419.72	4648.78	4665.03	2442.48	4002.41	4717.35	4095.21	969.322
421.719	4589.88	4715.12	2681.07	4299.62	4880.68	4233.28	893.339
423.718	4548.7	4764.03	2929.78	4571.79	5044.61	4371.78	830.246
425.716	4520.89	4817.03	3169.01	4845.92	5203.98	4511.37	788.522
427.715	4506.55	4873.48	3416.83	5132.71	5374.02	4660.72	766.138
429.714	4503.75	4917.3	3670.96	5430.12	5552.17	4814.86	764.522
431.712	4493.51	4948.6	3934.77	5704.1	5735.74	4963.35	778.499
433.711	4468.95	4969.78	4201.28	5956.19	5898.14	5098.87	805.134
435.71	4426.38	4997.51	4437.35	6195.53	6028.77	5217.11	851.115
437.708	4375.81	5023.98	4643.88	6417.1	6121.37	5316.43	905.818
439.707	4320.05	5039.71	4845.62	6615.07	6195.46	5403.18	963.398
441.706	4259.81	5054.35	5041.11	6806	6241.71	5480.6	1024.83
443.704	4202.36	5074.36	5232.9	6974.57	6251.36	5547.11	1079.84
445.703	4166.12	5098.42	5431.69	7119.64	6228.93	5608.96	1122.54
447.702	4140.24	5136.48	5625.66	7238.06	6180.44	5664.18	1156.07
449.7	4118.74	5149.92	5813.62	7339.62	6122.37	5708.85	1191.87
451.699	4093.3	5142.88	5981.64	7407.53	6094.22	5743.91	1228.07
453.698	4053.7	5122.53	6124.79	7449.28	6095.11	5769.08	1266.54
455.696	4005.43	5092.07	6258.14	7457.39	6111.42	5784.89	1301.38
457.695	3950.53	5057.31	6383.51	7433.47	6144.79	5793.92	1332.25
459.694	3890.02	5024.43	6507.71	7387.09	6155.09	5792.87	1359.7
461.692	3826.49	4993.44	6621.02	7339.24	6158.81	5787.8	1388.94
463.691	3760.43	4961.14	6709.16	7304.27	6166.77	5780.35	1421.75
465.69	3703.22	4918.46	6772.18	7269.95	6154.82	5763.73	1449.04
467.688	3659.92	4862.22	6818.61	7228.29	6119.1	5737.63	1467.94
469.687	3619.76	4793.87	6849.12	7165.1	6064.56	5698.48	1478.88
471.686	3584.45	4713.51	6820.22	7077.2	5999.86	5639.05	1472.38
473.684	3554.97	4626.25	6742.65	6959.5	5954.74	5567.62	1449.55
475.683	3525.94	4546.85	6624.88	6831.99	5917.73	5489.48	1415.89
477.682	3501.91	4485.34	6508.49	6703.18	5867.38	5413.26	1376.95
479.68	3484.66	4430.02	6418.37	6574.67	5790.57	5339.66	1337.97
481.679	3472.86	4404.17	6340.95	6494.24	5696.06	5281.65	1304.41
483.678	3460.11	4383.83	6264.06	6420.75	5586.24	5223	1271.06
485.676	3438.99	4355.77	6203.61	6354.53	5465.68	5163.72	1246.8
487.675	3412.1	4320.65	6153.18	6291.5	5351.16	5105.72	1229.65
489.674	3385.21	4281.85	6093.47	6251.16	5252.81	5052.9	1218.02
491.672	3358.72	4239.45	6016.67	6219.26	5164.18	4999.65	1206.17
493.671	3335.74	4196.7	5940.55	6201.23	5078.97	4950.64	1197.57
495.67	3306.54	4151.91	5873.47	6205.05	5003.54	4908.1	1200
497.668	3274.79	4104.58	5804.33	6188.18	4943.16	4863.01	1198.56
499.667	3241.35	4057.82	5742.61	6154.53	4891.27	4817.52	1194.81
501.666	3210.94	4019.66	5716.94	6117.83	4843.88	4781.85	1194.97
503.664	3184.42	3983.47	5733.5	6066.04	4783.73	4750.23	1197.81
505.663	3157.35	3946.68	5779.12	6001.02	4714.32	4719.7	1204.44
507.662	3129.27	3909.86	5797.42	5913.53	4642.16	4678.45	1200.99
509.66	3104.62	3873.22	5793.16	5809.74	4564.76	4629.1	1188.33
511.659	3086.05	3836.13	5769.2	5708.82	4484.32	4576.9	1170.77
513.658	3071.54	3799.22	5743.76	5612.14	4409.06	4527.14	1153.25
515.656	3060.56	3761.02	5721.23	5518.96	4339.2	4480.19	1137.06
517.655	3051.19	3719.66	5703.4	5392.42	4272.05	4427.74	1115.62
519.654	3046.75	3674.27	5687.31	5251.83	4208.96	4373.83	1092.45
521.652	3048.41	3629.83	5675.14	5116.33	4157.48	4325.44	1071.23
523.651	3057.73	3585.3	5653.56	5001.71	4108.32	4281.32	1050.42
525.65	3073.39	3538.18	5615.08	4902.45	4063.85	4238.59	1026.43
527.648	3086.59	3492.64	5569.48	4829.22	4015.86	4198.76	1005.65
529.647	3090.61	3450.72	5525.3	4778.04	3963.76	4161.69	991.364
531.646	3085.42	3419.18	5482.13	4737.79	3915.35	4127.98	979.812
533.644	3073.11	3398.92	5432.06	4706.79	3873.3	4096.84	966.947
535.643	3056.46	3389.14	5378.83	4680.73	3831.28	4067.29	953.126
537.642	3035.32	3384.21	5330.19	4656.12	3792.47	4039.66	941.397
539.64	3013.28	3379.77	5278.28	4633.59	3769.29	4014.84	928.151
541.639	2991.73	3373.75	5218.45	4617.07	3759.41	3992.08	912.656
543.638	2974.84	3367.9	5156.22	4597.8	3762.15	3971.78	894.049
545.636	2963.25	3363.7	5103.71	4571.81	3775.14	3955.52	875.434
547.635	2948.99	3359.13	5050.07	4539.38	3788.49	3937.21	856.439
549.634	2937	3348.33	4996.52	4503.52	3800.69	3917.21	837.657
551.632	2933.77	3332.54	4941.18	4467.3	3805.7	3896.1	817.055
553.631	2939.92	3314.15	4891.13	4440.93	3806.21	3878.47	797.874
555.63	2948.58	3296.38	4833.05	4411.95	3806.95	3859.38	775.023
557.628	2959.66	3281.03	4780.86	4381.41	3799.14	3840.42	752.906
559.627	2972.36	3276.96	4747.55	4345.48	3790.15	3826.5	733.236
561.626	2977.06	3268.82	4731.34	4302.52	3781.95	3812.34	720.916
563.624	2970.51	3255.59	4715.82	4264.06	3772.72	3795.74	713.996
565.623	2954.48	3241.09	4691.26	4228.94	3764.3	3776.01	707.814
567.622	2933.53	3229.81	4663.63	4204.35	3757.28	3757.72	703.228
569.62	2912.36	3222.99	4640.08	4193.7	3746.01	3743.03	701.474
571.619	2894.27	3222.55	4629.35	4189.48	3729.63	3733.06	702.823
573.618	2880.24	3220.87	4625.04	4179.66	3705.02	3722.16	704.435
575.616	2874	3212.42	4632.37	4155.48	3678.58	3710.57	706.518
577.615	2871.85	3200.45	4643	4118.34	3654.31	3697.59	707.406
579.614	2870.29	3189.93	4658.56	4071.77	3632.9	3684.69	708.69
581.612	2869.92	3181.21	4671.23	4026.79	3615.5	3672.93	709.176
583.611	2867.59	3174.39	4682.12	3993.36	3600.36	3663.56	711.176
585.61	2868.81	3166.11	4688.17	3975.41	3585.42	3656.79	712.747
587.608	2869.83	3153.6	4684.77	3967.15	3569.88	3649.05	712.887
589.607	2865.77	3138.02	4671.67	3962.63	3555.45	3638.71	711.859
591.606	2850.84	3121.69	4655.23	3957.63	3551.89	3627.46	712.386
593.604	2828.51	3107.28	4641.24	3952.1	3562.81	3618.39	715.158
595.603	2803.88	3097.07	4621.21	3946.8	3585.62	3610.92	715.804
597.602	2783.22	3099.85	4590.63	3942.05	3603.19	3603.79	709.852
599.6	2766.78	3112.79	4556.47	3935.74	3611.97	3596.75	699.874
601.599	2754.1	3120.65	4507.35	3923.37	3615.6	3584.21	684.139
603.598	2745.8	3124.1	4446.77	3906.67	3613.02	3567.27	663.705
605.596	2745.45	3123.39	4380.09	3881.62	3611.18	3548.35	638.76
607.595	2747.59	3120.22	4308.63	3852.94	3612.16	3528.31	611.834
609.594	2749.76	3112.25	4238.07	3831.7	3610.62	3508.48	587.339
611.592	2750.43	3103.31	4168.17	3815.28	3600.42	3487.52	564.442
613.591	2746.9	3090.7	4107.22	3799.31	3586.94	3466.22	546.544
615.59	2744.48	3072.35	4062.5	3773.58	3575.68	3445.72	532.905
617.588	2745.73	3049.37	4027.63	3742.59	3573.11	3427.69	521.641
619.587	2752.45	3023.62	4004.39	3712.25	3578.76	3414.29	513.494
621.586	2761.94	2996.79	3983.2	3684.9	3589.92	3403.35	506.706
623.584	2768.19	2973.34	3961.02	3665.33	3607.41	3395.06	502.31
625.583	2769.61	2955.87	3936.59	3663.44	3630.11	3391.12	501.129
627.582	2765.64	2943.66	3917.05	3685.13	3653.67	3393.03	505.819
629.58	2756.82	2941.71	3899.17	3730.16	3674.53	3400.48	514.112
631.579	2748.54	2949.35	3886.91	3782.33	3688.15	3411.06	522.769
633.578	2740.49	2954.48	3867.93	3836.25	3684.08	3416.65	529.629
635.576	2734.42	2951.09	3847.93	3891.11	3666.4	3418.19	537.509
637.575	2723.78	2942.26	3825.14	3952.42	3642.06	3417.13	549.963
639.574	2710.84	2929.77	3799.67	4028.87	3621.18	3418.07	569.774
641.572	2694.6	2916.95	3777.59	4120.39	3597.69	3421.44	597.757
643.571	2676.36	2905	3760.1	4226.91	3576.33	3428.94	634.237
645.57	2653.57	2897.43	3743.44	4343.99	3561.18	3439.92	677.648
647.568	2630.26	2889.09	3728.09	4473.5	3550.73	3454.34	728.272
649.567	2610.02	2881.14	3718.07	4600.5	3552.23	3472.39	779.844
651.566	2601.32	2874.96	3711.91	4710.85	3563.86	3492.58	823.583
653.564	2607.03	2874.66	3703.21	4797.25	3576.32	3511.69	854.071
655.563	2621.66	2883.51	3691.41	4834.55	3594.27	3525.08	862.402
657.562	2636.02	2903.03	3685.4	4813.24	3613.66	3530.27	847.075
659.56	2653	2924.66	3690.9	4714.21	3630.03	3522.56	802.112
661.559	2672.29	2945.82	3703.16	4531.23	3645.82	3499.66	727.7
663.558	2684.2	2965.35	3712.05	4260.29	3657.18	3455.81	630.343
665.556	2686.76	2979.3	3716.15	3903.98	3660.83	3389.41	526.101
667.555	2685.81	2987.45	3717.84	3475.92	3658.8	3305.16	449.741
669.554	2685.02	2990.35	3710.1	3003.29	3652.42	3208.24	450.667
671.552	2684.56	2990.65	3690.81	2507.38	3643.84	3103.45	543.257
673.551	2683.69	2988.15	3664.34	2001.4	3637.22	2994.96	697.256
675.55	2686.99	2984.04	3635.58	1523.98	3623.06	2890.73	867.368
677.548	2698.07	2973.78	3600.89	1116.99	3603.89	2798.72	1019.9
679.547	2714.8	2954.72	3560.46	861.858	3586.46	2735.66	1113.97
681.546	2725.2	2929.36	3535.14	670.785	3574.2	2686.94	1186.57
683.544	2721.5	2900.03	3530.27	531.7	3572.37	2651.17	1243.03
685.543	2709.92	2868.64	3537.2	438.751	3582.66	2627.43	1284.08
687.542	2691.79	2841.1	3550.61	397.795	3600.47	2616.35	1305.71
689.54	2675.32	2822.99	3566.75	418.461	3624.96	2621.69	1303.58
691.539	2665.79	2814.1	3581.41	512.538	3651.87	2645.14	1271.52
693.538	2661.75	2812.44	3596.7	691.547	3669.08	2686.3	1203.15
695.536	2657.67	2818.58	3605.76	970.708	3680.84	2746.71	1092.91
697.535	2655.9	2825.8	3608.99	1320.59	3682.87	2818.83	954.233
699.534	2651.07	2835.71	3604.93	1753.55	3678.79	2904.81	788
701.532	2645.66	2842.96	3589.12	2304.44	3669.03	3010.24	597.526
703.531	2646.81	2846.9	3563.74	2976.96	3658.01	3138.48	448.219
705.53	2651.6	2845.61	3530.54	3714.05	3650.62	3278.48	492.975
707.528	2653.39	2837.36	3495.92	4445.79	3644.11	3415.31	713.317
709.527	2657.1	2820.25	3468.87	5148.18	3632.04	3545.29	987.064
711.526	2661.29	2796.74	3449.98	5812.94	3620.12	3668.21	1267.2
713.524	2664.55	2770.03	3433.41	6439.31	3610.85	3783.63	1539.87
715.523	2663.82	2745.23	3410.43	7031.11	3603.08	3890.73	1802.28
717.522	2661.8	2718.3	3383.83	7584.21	3590.52	3987.73	2051.01
719.52	2659.42	2693.7	3362.03	8103.05	3573.54	4078.35	2285.65
721.519	2656.77	2677.17	3339.48	8594.23	3559.61	4165.45	2507.71
723.518	2653.47	2672.52	3317.5	9075.83	3551.23	4254.11	2724.14
725.516	2652.35	2689.04	3299.95	9530.18	3549.99	4344.3	2924.79
727.515	2653.82	2716.87	3289.79	9946.53	3546.74	4430.75	3106.52
729.514	2649.2	2761.95	3284.55	10336	3544.69	4515.28	3274.67
731.512	2639.83	2831.89	3281.88	10719.8	3547.16	4604.11	3437.51
733.511	2631.99	2933.69	3284.71	11094.9	3548.55	4698.77	3592.36
735.51	2626.86	3061.43	3290.8	11445.1	3545.46	4793.92	3733.41
737.508	2628.54	3214.12	3302.56	11751.1	3547.98	4888.85	3850.9
739.507	2629.19	3386.8	3309.16	11993	3562.59	4976.14	3938.5
741.506	2624.86	3578.04	3316.95	12166.1	3580.59	5053.3	3995.28
743.504	2618.81	3785.66	3333.93	12286.4	3606.08	5126.17	4027.25
745.503	2614.81	4019.28	3364.31	12354.6	3649.43	5200.48	4032.34
747.502	2615.08	4268.48	3409.44	12387.8	3719.99	5280.16	4018.04
749.5	2618.83	4515.25	3467.39	12411.4	3827.36	5368.05	3996.27
751.499	2624.52	4755.52	3550.77	12449.9	3984.07	5472.96	3975.48
753.498	2627.39	4980.09	3673.51	12564.2	4187.37	5606.51	3982.07
755.496	2623.8	5191.77	3839.77	12793.7	4422.38	5774.28	4034.45
757.495	2614.66	5383.04	4053.32	13126.8	4682.5	5972.07	4127.79
759.494	2603.11	5559.03	4311.52	13569	4937.52	6196.04	4266.46
761.492	2592.6	5731.59	4609.17	14119.5	5180.42	6446.66	4450.22
763.491	2587.57	5902.6	4930.06	14666.4	5386.88	6694.7	4633.26
765.49	2585.61	6072.44	5286.52	15152.2	5541.47	6927.64	4791.71
767.488	2584.47	6243.95	5686.96	15543.9	5635.56	7138.98	4913.16
769.487	2588.22	6421.02	6125.22	15827	5656.8	7323.65	4994
771.486	2597.85	6607.15	6601.1	15984.3	5609.06	7479.88	5029.72
773.484	2609.85	6782.31	7093.65	16007.6	5490.82	7596.84	5024.01
775.483	2618.17	6942.55	7580.73	15878.5	5284.53	7660.89	4978.13
777.482	2623.8	7084.12	7996.44	15593.1	4988.46	7657.18	4895.89
779.48	2625.64	7196.49	8328.48	15159.3	4608.99	7583.77	4783.44
781.479	2619.72	7271.09	8571.78	14583.4	4160.57	7441.31	4645.62
783.478	2605.45	7308.99	8730.77	13928.6	3661.48	7247.05	4506.91
785.476	2582.72	7318.3	8808.07	13307.5	3121.31	7027.57	4407.58
787.475	2556.81	7302.95	8815.77	12861.4	2570.93	6821.56	4385.88
789.474	2530.33	7264.09	8767.68	12630.2	2046.67	6647.79	4438.1
791.472	2513.85	7206.6	8676.56	12445.8	1587.69	6486.1	4489.11
793.471	2503.8	7135.47	8581.08	12255.6	1237.55	6342.7	4511.12
795.47	2493.58	7054.2	8519.41	12055.9	1004.3	6225.48	4503.62
797.468	2483.02	6972.51	8509.61	11854.1	819.865	6127.82	4489.87
799.467	2473.06	6904.84	8504.11	11655.7	665.682	6040.68	4471.09
801.466	2465.81	6850.7	8504.01	11466.8	536.676	5964.8	4450.05
803.464	2455.61	6821.63	8500.91	11294.8	429.866	5900.57	4430.14
805.463	2441.48	6800.5	8489.39	11146.8	344.254	5844.49	4411.84
807.462	2428.83	6777.06	8478.36	11005	273.69	5792.58	4391.03
809.46	2418.21	6750.98	8475.78	10859	216.177	5744.02	4366.27
811.459	2410.25	6710.96	8487.85	10723.4	171.271	5700.75	4342.18
813.458	2408.79	6656.71	8506.17	10603	134.348	5661.8	4319.45
815.456	2421.71	6596.41	8533.2	10450.6	105.297	5621.44	4284.14
817.455	2441.99	6537.64	8571.3	10246.7	81.7275	5575.88	4234.43
819.454	2460.37	6489.95	8617.64	9988.88	62.702	5523.91	4172.84
821.452	2477.2	6457.96	8672.56	9695.89	47.3896	5470.2	4106.46
823.451	2489.84	6443.89	8734.25	9394.39	35.2195	5419.52	4043.82
825.45	2502.83	6454.35	8796.66	9122.03	25.4875	5380.27	3993.1
827.448	2520.84	6478.76	8852.69	8911.22	17.9778	5356.3	3957.89
829.447	2548.2	6500.5	8884.71	8761.34	12.0169	5341.35	3930.61
831.446	2578.25	6510.26	8896.74	8672.27	6.7994	5332.87	3911.33
833.444	2609.4	6503.29	8891.78	8637.13	3.05867	5328.93	3898.01
835.443	2633.23	6479.9	8867.55	8657.56	0	5327.65	3892
837.442	2649.07	6433.69	8829.3	8726.56	-2.43531	5327.24	3893.01
839.44	2655.98	6379.35	8780.82	8828.02	-3.93807	5328.05	3900.21
841.439	2655.44	6325.87	8734.43	8951.11	-5.0016	5332.37	3915.03
843.438	2649.69	6276.35	8680.07	9092.57	-3.27026	5339.08	3933.92
845.436	2643.71	6238.5	8608.83	9237.22	6.49746	5346.95	3949.58
847.435	2643.13	6231.16	8518.64	9378.62	30.5912	5360.43	3958.2
849.434	2639.77	6263.82	8407.91	9508.72	79.9068	5380.03	3955.87
851.432	2631.98	6309.24	8279.28	9626.48	168.968	5403.19	3937.18
853.431	2626.08	6363.15	8146.81	9720.57	317.338	5434.79	3894.29
855.43	2615.7	6421.27	8029.49	9758.74	546.939	5474.43	3815.52
857.428	2600.47	6471.72	7929.31	9718.5	881.992	5520.4	3686.89
859.427	2581.59	6519.5	7844.38	9605.09	1343.57	5578.83	3505.32
861.426	2562.25	6567.18	7770.12	9425.03	1948.82	5654.68	3271.84
863.424	2546.16	6621.2	7712.09	9180.63	2665.48	5745.11	3006.53
865.423	2535.51	6685.81	7668.9	8899.34	3441.57	5846.22	2742.8
867.422	2527.61	6762.95	7638.28	8619.49	4269.25	5963.52	2508.69
869.42	2517.66	6853.44	7606	8390.82	5135.06	6100.6	2337.09
871.419	2510.97	6930.77	7542.27	8242.78	6004.11	6246.18	2244.18
873.418	2509.87	6983.31	7454.67	8134.64	6870.03	6390.5	2225.71
875.416	2512.46	7017.87	7347.08	8063.51	7732.88	6534.76	2282.8
877.415	2515.02	7036.11	7236.88	8029.66	8592.18	6681.97	2411.53
879.414	2513.68	7039.64	7154.58	8029.03	9450.46	6837.48	2602.12
881.412	2507.29	7033.77	7096.99	8059.69	10329.9	7005.53	2846.32
883.411	2500.02	7021.17	7044.31	8118.32	11210.9	7178.94	3125.48
885.41	2488.49	7006.78	6987.58	8201.85	12082.3	7353.4	3427.96
887.408	2474.37	6997.59	6922.26	8299.44	12896.8	7518.1	3728.49
889.407	2458.39	6997.11	6842.7	8404.2	13624.8	7665.44	4009.26
891.406	2441.28	6999.65	6754.94	8512.64	14249.1	7791.53	4258.74
893.404	2424.84	7001.08	6668.95	8615.36	14759.9	7894.02	4468.5
895.403	2403.33	6991.62	6592.7	8698.89	15150.9	7967.49	4635.15
897.402	2384.02	6968.97	6535.03	8726.01	15404.6	8003.73	4746.14
899.4	2371.41	6935.23	6497.51	8696.92	15529.4	8006.1	4802.35
901.399	2363.83	6891.93	6467.74	8619.87	15540	7976.66	4810.78
903.398	2356.66	6841.38	6449.78	8503.18	15455.7	7921.34	4780.23
905.396	2349.18	6783.81	6450.75	8358.12	15286.9	7845.75	4714.86
907.395	2341.22	6725.74	6466.12	8210.48	15072.9	7763.29	4631.09
909.394	2331.43	6678.42	6488.43	8096.36	14854.1	7689.75	4546.18
911.392	2325.46	6654.52	6520.78	8018.64	14678.8	7639.64	4476.52
913.391	2324.77	6640.76	6571.27	7968.61	14609.8	7623.04	4446.26
915.39	2325.08	6640.17	6644.74	7929.04	14594.4	7626.68	4435.21
917.388	2326.03	6653.17	6729.74	7901.5	14584.3	7638.94	4425.27
919.387	2334.15	6661.75	6830.76	7868.31	14568.5	7652.7	4410.77
921.386	2357.16	6660.41	6934.89	7831.91	14553.1	7667.49	4392.86
923.384	2407.49	6654.76	7035.86	7788.92	14535.6	7684.53	4366.82
925.383	2499.38	6645.35	7130.92	7734.75	14520.4	7706.16	4330.16
927.382	2635.64	6630.83	7211.3	7676.83	14492.7	7729.46	4276.88
929.38	2807.76	6608.45	7262.7	7618.59	14457.7	7751.03	4212.37
931.379	2998.18	6580.35	7290.91	7569.61	14416.9	7771.19	4142.36
933.378	3205.93	6544.27	7298.58	7529.33	14366.6	7788.95	4065.93
935.376	3422.44	6497.48	7300.21	7491.83	14310.8	7804.55	3987.32
937.375	3631.6	6437.42	7318.74	7450.52	14251.6	7817.98	3911.76
939.374	3825.45	6366.16	7363.98	7398.87	14169.1	7824.7	3832.94
941.372	3990.77	6285.13	7439.17	7340.25	14047.6	7820.58	3747.55
943.371	4135.01	6206.88	7534.8	7277.07	13882.3	7807.21	3650.61
945.37	4263.6	6135.87	7629.33	7209.97	13670.2	7781.79	3539.42
947.368	4380.4	6064.97	7710.36	7135.27	13415.6	7741.33	3415.85
949.367	4486.78	5997.02	7772.56	7054.05	13141.5	7690.38	3288.49
951.366	4582.98	5927.12	7815.06	6972.57	12874.3	7634.4	3168.32
953.364	4671.36	5843.98	7847.79	6896.52	12630.4	7578.01	3062.65
955.363	4754.34	5748.34	7878.29	6826.65	12416.4	7524.8	2973.68
957.362	4837.21	5641.03	7923.72	6769.18	12225.6	7479.35	2897.79
959.36	4917.91	5531.87	7993.35	6725.73	12047.7	7443.31	2830.58
961.359	4994.58	5427.5	8085.45	6692.8	11874.5	7414.96	2768.87
963.358	5065.54	5334.79	8207.26	6662.91	11705.3	7395.15	2713.16
965.356	5135.1	5246.51	8364.27	6631.2	11536.7	7382.75	2664.53
967.355	5199.23	5164.66	8550.25	6601.54	11364.1	7375.95	2622.57
969.354	5254.59	5082.86	8756.94	6575.8	11187.5	7371.54	2590.06
971.352	5303.44	5004.25	8942.68	6557.5	11015.9	7364.75	2563.85
973.351	5348	4939.45	9073.56	6549.94	10849.2	7352.03	2533.47
975.35	5390.29	4895.81	9134.86	6550.35	10697.2	7333.71	2494.56
977.348	5437.06	4872.89	9116.46	6553.44	10560.9	7308.16	2441.91
979.347	5491.84	4866.34	9007.37	6548.6	10432.6	7269.34	2370.65
981.346	5547.64	4872.76	8809.55	6537.8	10314.3	7216.42	2284.36
983.344	5598.38	4887.73	8524.77	6530.43	10209.9	7150.25	2188.74
985.343	5638.95	4904.74	8181.6	6527.59	10120.5	7074.67	2095.92
987.342	5668.37	4926.61	7828.68	6529.84	10048.8	7000.46	2017.12
989.34	5691.21	4946.99	7517.75	6529.47	9995.66	6936.22	1960.29
991.339	5709.72	4956.6	7310.82	6513.42	9946.23	6887.36	1922.92
993.338	5718.02	4963.86	7150.33	6487.23	9891.61	6842.21	1891.55
995.336	5714.98	4970.24	7031.91	6452.81	9836.48	6801.28	1865.47
997.335	5696.25	4969.27	6937.85	6413.27	9778.65	6759.06	1844.07
999.334	5665.9	4950.95	6863.15	6375.34	9713.9	6713.85	1826.41
1001.33	5624.62	4917.18	6800.75	6331.41	9642.66	6663.32	1812
1003.33	5573.77	4870.24	6749.56	6283.17	9569.88	6609.33	1801.92
1005.33	5518.6	4814.98	6712.35	6235.69	9491.29	6554.58	1792.37
1007.33	5465.99	4752.94	6689.62	6181.91	9405.74	6499.24	1781.98
1009.33	5420.3	4694.88	6670.43	6118.67	9315.39	6443.93	1768.43
1011.33	5382.74	4643.04	6647.82	6048.08	9223.1	6388.96	1751.88
1013.32	5340.79	4598.13	6618.81	5973.76	9143.64	6335.03	1739.59
1015.32	5296.29	4558.86	6586.27	5900.08	9079.48	6284.2	1732.42
1017.32	5250.88	4522.67	6551.8	5830.48	9043.62	6239.89	1735.86
1019.32	5209.63	4492.33	6517.71	5754.27	9023.85	6199.56	1744.33
1021.32	5169.2	4471.79	6489.03	5672.73	9007.53	6162.06	1752.56
1023.32	5136.84	4466.15	6473.76	5599.53	9009.08	6137.07	1763.75
1025.32	5120.53	4467.2	6461.32	5547.02	9031.08	6125.43	1778.32
1027.32	5120.53	4473.82	6451.92	5519.33	9076.48	6128.42	1797.24
1029.31	5130.97	4480.48	6446.62	5518.9	9146.88	6144.77	1822.99
1031.31	5151.46	4493.34	6475.28	5538.61	9235.99	6178.94	1853.4
1033.31	5181.07	4516.33	6513.51	5574.82	9319.2	6220.99	1876.79
1035.31	5218.38	4548.77	6537.54	5621.63	9390.84	6263.43	1890.76
1037.31	5255.49	4587.78	6545.95	5690.36	9450.88	6306.09	1896.23
1039.31	5289.42	4635.42	6537.99	5779.02	9501.91	6348.75	1894.76
1041.31	5320.78	4691.69	6513.81	5888.34	9541.68	6391.26	1885.97
1043.3	5344.43	4756.78	6475.16	6014.82	9573.03	6432.84	1872.91
1045.3	5352.49	4826.11	6420.91	6147.94	9592.41	6467.97	1857.87
1047.3	5342.74	4887.31	6363.8	6280.5	9592.35	6493.34	1841.82
1049.3	5317.99	4931.36	6311.9	6396.07	9583.45	6508.15	1831.07
1051.3	5275.99	4958.64	6269.33	6486.1	9573.55	6512.72	1828.47
1053.3	5217.41	4967.63	6225.65	6546.33	9573.89	6506.18	1838.42
1055.3	5143.31	4956.4	6178.02	6568.43	9585.08	6486.25	1860.67
1057.3	5061.24	4921.93	6133.32	6553.34	9603.71	6454.71	1892.11
1059.29	4981.13	4858.27	6090.77	6499.15	9619.25	6409.71	1927.35
1061.29	4911.55	4764.19	6048.6	6406.02	9618.2	6349.71	1959.53
1063.29	4860.05	4648.77	6011.49	6271.88	9597.17	6277.87	1984.5
1065.29	4816.04	4517.58	5981.62	6112.07	9554.16	6196.29	2003.22
1067.29	4778.93	4389.66	5952.94	5945.35	9475.67	6108.51	2006.91
1069.29	4753.17	4262.93	5927.05	5822.32	9371.88	6027.47	1998.42
1071.29	4745.1	4152.07	5900.94	5728.35	9247.76	5954.84	1975.54
1073.28	4744.45	4057.64	5870.75	5653.74	9112.67	5887.85	1943.68
1075.28	4738.53	3980.6	5835.01	5595.06	8981.23	5826.09	1910.3
1077.28	4728.9	3916.26	5795.5	5551.87	8872.29	5772.96	1883.66
1079.28	4719.86	3869.54	5751.86	5524.97	8797.93	5732.83	1866.57
1081.28	4713.51	3845.91	5707.43	5516.8	8768.93	5710.52	1861.6
1083.28	4704.49	3852.75	5656.34	5530.29	8776.05	5703.99	1863.87
1085.28	4694.53	3886.15	5604.83	5561.05	8822.36	5713.78	1876.01
1087.28	4687.15	3949.29	5566.97	5607.94	8902.13	5742.7	1894.83
1089.27	4684.7	4027.56	5538.36	5659.29	9018.47	5785.67	1925.57
1091.27	4683.55	4110.38	5509.11	5700.28	9159.89	5832.64	1967.19
1093.27	4677.43	4192.75	5480.82	5723.51	9303.99	5875.7	2012.49
1095.27	4667.66	4277.93	5461.59	5725.77	9404.68	5907.53	2040.52
1097.27	4656.96	4364.25	5444.29	5718.19	9439.51	5924.64	2041.42
1099.27	4647.09	4450.92	5428.64	5700.75	9390.46	5923.57	2006.99
1101.27	4634.15	4537.02	5424.49	5677.97	9265.82	5907.89	1940.61
1103.26	4615.38	4617.89	5441.58	5658.82	9074.72	5881.68	1846.59
1105.26	4590.9	4686.98	5471.32	5653.02	8823.69	5845.18	1729.37
1107.26	4563.24	4745.13	5511.64	5650.7	8547.37	5803.61	1604.35
1109.26	4532.95	4787.82	5570.77	5648.19	8292.96	5766.54	1492.88
1111.26	4499.11	4808.8	5637.64	5638.08	8091.61	5735.05	1410.47
1113.26	4459.67	4807.71	5706.11	5623.56	7944.4	5708.29	1358.08
1115.26	4416.05	4788.75	5772.51	5608.58	7821.73	5681.52	1322.17
1117.26	4370.69	4751.88	5816.67	5595.39	7731.75	5653.28	1304.57
1119.25	4320.56	4698.69	5845.71	5583.97	7679.45	5625.68	1306.79
1121.25	4268.83	4632.77	5852.38	5570.82	7656.69	5596.3	1323.06
1123.25	4219.17	4555.98	5833.36	5560.03	7662.75	5566.26	1351.11
1125.25	4175.92	4469.69	5790.75	5554.26	7696.89	5537.5	1389.38
1127.25	4138.74	4377.27	5726.12	5560.42	7745.64	5509.64	1432.72
1129.25	4106.99	4287.16	5643.15	5584.63	7805.2	5485.43	1479.19
1131.25	4082.36	4207.48	5550.65	5630.73	7867.9	5467.82	1524.94
1133.24	4063.33	4144.82	5461.98	5676.29	7931.23	5455.53	1567.96
1135.24	4051.62	4110.42	5389.7	5727.2	8004.48	5456.69	1609
1137.24	4049.05	4099.64	5335.48	5780.7	8072.97	5467.57	1642.18
1139.24	4050.04	4116.22	5284.98	5841.43	8139.81	5486.5	1669.41
1141.24	4045.83	4139.38	5240.63	5902.52	8194.82	5504.64	1692.42
1143.24	4035.07	4165.54	5189.57	5946.89	8239.03	5515.22	1712.02
1145.24	4015.56	4192	5127.36	5973.48	8266.75	5515.03	1727.08
1147.24	3984.88	4217.04	5059.15	5971.77	8264.46	5499.46	1732.1
1149.23	3941.73	4233.52	4991.35	5940.97	8224.84	5466.48	1725.15
1151.23	3888.61	4242.13	4926.56	5886.88	8154.75	5419.79	1708.28
1153.23	3826.5	4246.57	4872.13	5813.2	8055.19	5362.72	1680.68
1155.23	3763.65	4254.18	4830.93	5727.08	7928.38	5300.84	1640.5
1157.23	3707.37	4269.4	4807.15	5641.89	7786.84	5242.53	1591.09
1159.23	3652.67	4287.41	4794.7	5577.58	7643.26	5191.12	1541.35
1161.23	3606.9	4308.48	4787.09	5525.71	7518.91	5149.42	1497.82
1163.22	3582.29	4340.98	4788.85	5494.87	7431.57	5127.71	1463.27
1165.22	3575.77	4388.1	4805.69	5478.95	7362.16	5122.13	1429.62
1167.22	3578.77	4437.06	4826.47	5474.8	7311.68	5125.75	1401.53
1169.22	3590.37	4475.98	4856.55	5471.7	7272.41	5133.4	1376.56
1171.22	3607.34	4499.54	4905.3	5474.02	7237.63	5144.77	1353.31
1173.22	3617.67	4512.19	4977.03	5492.47	7216.05	5163.08	1338.82
1175.22	3619.45	4516.13	5066.45	5536.4	7216.3	5190.94	1338.09
1177.22	3617.09	4514.59	5170.91	5610.48	7244.5	5231.52	1352.75
1179.21	3610.27	4507.74	5268.31	5682.16	7297.12	5273.12	1379.75
1181.21	3601.22	4497.44	5362.47	5754.68	7378.87	5318.94	1419.55
1183.21	3591.73	4487.68	5460.84	5834.17	7489.69	5372.82	1471.18
1185.21	3587.96	4488.11	5535.18	5916.86	7615.15	5428.65	1525.06
1187.21	3591.84	4501.34	5590.62	5984.56	7742.55	5482.18	1573.92
1189.21	3601.74	4520.02	5633.86	6044.93	7861.79	5532.47	1616.43
1191.21	3611.8	4535.79	5661.31	6088.49	7973.03	5574.08	1654.98
1193.2	3613.69	4542.84	5672.32	6111.79	8056.51	5599.43	1685.58
1195.2	3618.71	4541.32	5664.3	6110.87	8101.02	5607.24	1700.46
1197.2	3631.39	4534.04	5643.96	6093.63	8084.48	5597.5	1690.41
1199.2	3654.87	4524.44	5617.22	6060.11	8008.72	5573.07	1654.59
1201.2	3693.52	4516.4	5608.86	6011.17	7881.71	5542.33	1594.33
1203.2	3743.74	4516.17	5617.95	5951.36	7709.29	5507.7	1512.5
1205.2	3804.55	4527.81	5643.62	5881.8	7525.61	5476.68	1421.84
1207.2	3873.14	4542.72	5677.96	5802.19	7347.01	5448.6	1330.82
1209.19	3938.08	4557.8	5716.64	5718.74	7201.9	5426.63	1254.16
1211.19	3998.11	4568.66	5755.12	5636.62	7065.85	5404.87	1184.64
1213.19	4053.99	4580.5	5784.06	5570.55	6942.14	5386.25	1122.18
1215.19	4108.17	4595.3	5798.68	5534.38	6830.14	5373.33	1064.79
1217.19	4151.92	4616.63	5796.87	5518.9	6731.58	5363.18	1013.58
1219.19	4181.91	4641.2	5777	5505.95	6654.36	5352.08	971.443
1221.19	4192.78	4662.59	5739.51	5495.54	6595.11	5337.1	939.956
1223.18	4185.11	4683.53	5687.41	5490.21	6554.04	5320.06	919.223
1225.18	4161.7	4705.4	5623.06	5488.4	6534.69	5302.65	910.158
1227.18	4125.8	4728.38	5552.04	5492.45	6522.56	5284.25	908.219
1229.18	4079.69	4742.9	5479.17	5504.94	6515.32	5264.4	914.371
1231.18	4029.38	4746.43	5405.91	5522.4	6512.95	5243.42	926.935
1233.18	3977.55	4738.3	5332.62	5542.19	6507.18	5219.57	941.943
1235.18	3925.8	4715.35	5258.82	5557.11	6509.45	5193.3	962.275
1237.18	3876.3	4672.66	5195.45	5577.08	6520.27	5168.35	988.76
1239.17	3823.14	4613.32	5145.04	5606.61	6542.73	5146.17	1024.3
1241.17	3770.36	4540.55	5105.52	5649.65	6578.05	5128.83	1068.12
1243.17	3720.2	4462.77	5079.83	5694.2	6623.14	5116.03	1116.03
1245.17	3679.5	4391.14	5065.69	5733.72	6659.58	5105.92	1157.06
1247.17	3655.84	4334.82	5056.04	5763.73	6689.14	5099.91	1187.32
1249.17	3653.23	4292.23	5046.02	5788.19	6702.13	5096.36	1203.01
1251.17	3674.39	4260.93	5030.35	5818.09	6699.74	5096.7	1205.82
1253.16	3707.12	4228.7	5007	5857.07	6684.36	5096.85	1203.25
1255.16	3742.01	4196.04	4972.2	5904.02	6654.55	5093.76	1197.97
1257.16	3780.85	4168.9	4929.86	5957.3	6609.79	5089.34	1188.48
1259.16	3824.75	4151.54	4890.8	5999.45	6558.3	5084.97	1173.04
1261.16	3863.8	4155.03	4860.62	6029.76	6508.31	5083.5	1153.79
1263.16	3890.09	4184.58	4846.38	6051.51	6461.83	5086.88	1131.96
1265.16	3903.82	4222.34	4848.13	6080	6437.44	5098.34	1119.56
1267.16	3906.9	4265.4	4868.44	6113.42	6436.29	5118.09	1116.33
1269.15	3903.62	4311.16	4891.53	6145.43	6446.28	5139.61	1117.43
1271.15	3899.12	4345.39	4920.97	6170.36	6454.86	5158.14	1118.93
1273.15	3895.6	4369.61	4960.4	6192.88	6469.36	5177.57	1122.83
1275.15	3899.91	4387	5011.19	6217.69	6494.22	5202	1128.89
1277.15	3901.41	4400.79	5072.98	6240.58	6531.64	5229.48	1139.4
1279.15	3893.87	4414.69	5142.24	6260.88	6584.63	5259.26	1156.62
1281.15	3878.16	4431.84	5218.86	6288.56	6657.2	5294.92	1183.33
1283.14	3854.19	4454.94	5290.26	6333.29	6750.11	5336.56	1221.52
1285.14	3820.35	4482.84	5342.74	6392.94	6867.23	5381.22	1272.47
1287.14	3778.78	4504.68	5380.05	6463.53	7012.05	5427.82	1337.56
1289.14	3731.99	4515.48	5407.97	6518.32	7183.24	5471.4	1411.54
1291.14	3683.85	4518.99	5427.13	6533.75	7368.75	5506.49	1485.49
1293.14	3635.72	4516.55	5433.09	6502.96	7544.94	5526.65	1551.72
1295.14	3584.37	4508.04	5426.94	6439.99	7694.85	5530.84	1608.97
1297.14	3533.88	4495.35	5410.47	6352.5	7802.37	5518.91	1651.43
1299.13	3487.73	4482.14	5393.74	6248.76	7854.24	5493.32	1673.28
1301.13	3446.95	4470.85	5375.47	6146.99	7847.96	5457.64	1674.23
1303.13	3409.47	4464.52	5344.37	6056.92	7791.4	5413.34	1657.55
1305.13	3374.72	4469.7	5301.78	5973.4	7695.16	5362.95	1625.31
1307.13	3342.65	4482.52	5249.51	5902.69	7571.97	5309.87	1583.24
1309.13	3316.94	4492.14	5192.6	5859.06	7453.69	5262.88	1544.4
1311.13	3298.84	4499.19	5133.86	5849.4	7376.02	5231.46	1521.65
1313.12	3291.14	4504.08	5074.76	5864.71	7324.97	5211.93	1508.34
1315.12	3297.93	4506.87	5021.33	5899.18	7271.42	5199.35	1492.47
1317.12	3323.3	4509.48	4976.68	5951.65	7211.7	5194.56	1471.43
1319.12	3370	4513.28	4930.4	6016.88	7145.63	5195.24	1444.46
1321.12	3427.91	4509.82	4883.41	6074.05	7076.41	5194.32	1414.36
1323.12	3495.78	4496.08	4845.05	6121.32	7005.57	5192.76	1381.53
1325.12	3572.68	4474.35	4823.15	6161.69	6939.29	5194.23	1347.83
1327.12	3649.09	4446.84	4812.96	6197.96	6879.24	5197.22	1317.01
1329.11	3724.33	4414.92	4810.6	6231.03	6821.64	5200.5	1288.25
1331.11	3810.7	4381.63	4808.31	6253.83	6767.6	5204.41	1257.09
1333.11	3895.61	4344.16	4830.5	6267.3	6724.43	5212.4	1228.08
1335.11	3974.26	4302.52	4871.22	6279.09	6697.3	5224.88	1206.16
1337.11	4052.18	4263.25	4927.82	6294.84	6686.89	5244.99	1190.43
1339.11	4115.02	4221.25	4991.82	6318.21	6699.16	5269.09	1188.75
1341.11	4157.15	4173.97	5054.83	6349.63	6729.17	5292.95	1201.89
1343.1	4184.39	4124.49	5107.61	6394.62	6763.29	5314.88	1224.92
1345.1	4199.76	4073.6	5152.37	6455.9	6797.41	5335.81	1255.82
1347.1	4198.75	4019.82	5194.97	6533.64	6837.02	5356.84	1297.19
1349.1	4179.03	3962.95	5236.48	6603.53	6876.48	5371.7	1342.3
1351.1	4143.36	3905.87	5279.13	6644.7	6911.4	5376.89	1383.58
1353.1	4095.63	3852.06	5325.46	6647.79	6932.79	5370.74	1414.67
1355.1	4043.48	3813.13	5360.43	6612.64	6944.04	5354.74	1432.15
1357.1	3994.41	3802.42	5384.98	6547.41	6947.98	5335.44	1433.54
1359.09	3954.28	3819.95	5396.45	6449.12	6950.55	5314.07	1419.03
1361.09	3923.42	3856.19	5387.73	6317.49	6954.48	5287.86	1392.76
1363.09	3896.35	3907.5	5366.41	6162.83	6958.97	5258.41	1360.3
1365.09	3873.9	3966.47	5335.24	6009.01	6953.75	5227.67	1325.21
1367.09	3855.72	4018.43	5300.9	5888.93	6951.08	5203.01	1299.45
1369.09	3842.17	4060.85	5262.37	5841.01	6961.21	5193.52	1290.14
1371.09	3832.34	4094.02	5217.03	5879.06	6993.35	5203.16	1301.07
1373.08	3821.32	4115.84	5167.84	5981.78	7043.16	5225.99	1330.63
1375.08	3810.84	4126.71	5120.69	6094.35	7105.16	5251.55	1369.69
1377.08	3804.65	4129.55	5069.77	6211.44	7187.63	5280.61	1418.72
1379.08	3806.87	4128.98	5020.01	6321.17	7290.12	5313.43	1473.23
1381.08	3813.42	4133	4968.64	6422.41	7391.25	5345.74	1525.15
1383.08	3825.9	4144.13	4912.99	6519.46	7493.64	5379.22	1575.32
1385.08	3842.13	4167.71	4854.93	6603.97	7568.04	5407.36	1611.85
1387.08	3855.49	4208.47	4810.77	6685.34	7599.75	5431.96	1630.82
1389.07	3869.44	4248.19	4778.21	6762.27	7584.69	5448.56	1633.46
1391.07	3889.14	4285.45	4748.28	6844.96	7523.78	5458.32	1622.57
1393.07	3917.04	4323.22	4723.67	6937.95	7425.31	5465.44	1601.7
1395.07	3953.54	4361.32	4702.18	7047.57	7300.49	5473.02	1577.79
1397.07	3995.52	4396.2	4686.8	7179.81	7165.66	5484.8	1560.3
1399.07	4039.72	4421.96	4681.11	7323.84	7063.34	5505.99	1560.08
1401.07	4077.89	4437.59	4691	7469.79	7007.96	5536.85	1577.4
1403.06	4100.89	4445.82	4710.88	7601.99	6964.42	5564.8	1599.48
1405.06	4115.9	4450.95	4729.79	7701.13	6927.06	5584.97	1616.7
1407.06	4126.86	4457.41	4754.92	7730.98	6894.09	5592.85	1612.86
1409.06	4134.16	4461.06	4790.87	7680.76	6857.96	5584.96	1582.05
1411.06	4133.73	4461.52	4834.47	7569.16	6810.02	5561.78	1530.24
1413.06	4129.36	4461.21	4888.13	7413.07	6753.34	5529.02	1462.76
1415.06	4125.43	4463.91	4949.06	7223.59	6697.05	5491.81	1384.72
1417.06	4128.22	4472.78	5021.65	7056.94	6647.04	5465.33	1313.35
1419.05	4132.51	4487.29	5101.02	6964.64	6609.85	5459.06	1267.22
1421.05	4136.55	4511.52	5184.08	6898.26	6588.64	5463.81	1231.83
1423.05	4144.98	4539.77	5262.58	6857.79	6585.49	5478.12	1207.68
1425.05	4161.19	4561.9	5326.47	6828.32	6597.83	5495.14	1190.81
1427.05	4179.63	4574.43	5371.38	6791.81	6623.22	5508.09	1177.57
1429.05	4193.38	4569.79	5399.67	6752.63	6658.62	5514.82	1171.86
1431.05	4199.27	4549.57	5418.84	6705.7	6696.56	5513.99	1171.14
1433.04	4200.27	4514.91	5433.53	6651.56	6730.46	5506.15	1173.04
1435.04	4191.79	4467.52	5444.99	6591.82	6755.52	5490.33	1177.75
1437.04	4171.19	4406.29	5453.21	6529.89	6765.48	5465.21	1185.35
1439.04	4140.41	4333.56	5463.77	6468.55	6750.24	5431.31	1192.48
1441.04	4097.45	4257.67	5469.23	6407.81	6720.26	5390.48	1200.49
1443.04	4043.8	4190.18	5468.9	6360.23	6678.78	5348.38	1209.51
1445.04	3978.53	4146.95	5459.15	6325.61	6634.89	5309.03	1218.05
1447.04	3909.56	4131.55	5437.67	6299.86	6591.76	5274.08	1222.96
1449.03	3839.91	4131.2	5408.16	6288.78	6551.26	5243.86	1228.54
1451.03	3772.92	4149.49	5375.39	6296.88	6503.7	5219.68	1232.04
1453.03	3711.61	4181.14	5343.03	6304.7	6451.31	5198.36	1230.85
1455.03	3654.79	4221.74	5314.79	6308.69	6396.55	5179.31	1226.44
1457.03	3605.26	4269.05	5296.25	6306.84	6344.24	5164.33	1219.34
1459.03	3568.94	4311.64	5280.16	6307.09	6301.36	5153.84	1212.84
1461.03	3546.89	4352.04	5264.72	6312.19	6273.32	5149.83	1207.52
1463.02	3538.38	4390.8	5254.54	6319.91	6250.67	5150.86	1200.5
1465.02	3544.96	4427.74	5247.33	6327.3	6232.55	5155.98	1190.07
1467.02	3562.19	4460.03	5247.2	6340.86	6221.23	5166.3	1180.15
1469.02	3589.58	4489.91	5262.85	6360.45	6219.45	5184.45	1171.15
1471.02	3627.8	4522.98	5292.9	6388	6233.36	5213.01	1163.74
1473.02	3662.54	4563.28	5325.84	6426.93	6257.86	5247.29	1161.71
1475.02	3687.37	4613.87	5349.56	6479.35	6294.34	5284.9	1167.5
1477.02	3704.66	4663.2	5359.32	6544.31	6339.14	5322.13	1181.08
1479.01	3723.13	4706.1	5358.1	6606.7	6381.8	5355.17	1194.27
1481.01	3744.86	4734.59	5352.26	6650.68	6408.13	5378.1	1200.28
1483.01	3769.97	4753.63	5345.41	6669.09	6415.82	5390.79	1195.81
1485.01	3796.74	4765.41	5339.46	6666.11	6416.06	5396.76	1184.5
1487.01	3827.02	4770.03	5337.6	6653.26	6414.96	5400.57	1170.02
1489.01	3854.2	4769.81	5340.19	6629.53	6410.28	5400.8	1153.54
1491.01	3876.96	4761.12	5344.1	6599.73	6408.33	5398.05	1138.75
1493	3898.86	4741.07	5337.31	6576.21	6411.9	5393.07	1129.02
1495	3916.96	4710.61	5324.36	6552.66	6414.26	5383.77	1122.1
1497	3929.22	4672.81	5308.14	6525.02	6414.89	5370.01	1117.1
1499	3932.06	4629.07	5287.03	6490.65	6412.52	5350.27	1114.03
1501	3925.96	4577.83	5258.31	6453.2	6410.98	5325.26	1114.92
1503	3912.73	4519.85	5220.79	6419.43	6409.31	5296.42	1120.61
1505	3888.31	4463.31	5174.03	6389.03	6413.07	5265.55	1132.23
1507	3854.27	4411.26	5124.33	6352.23	6424.5	5233.32	1146.77
1508.99	3813.75	4361.63	5075.75	6311.91	6442.75	5201.16	1164.13
1510.99	3769.68	4318.32	5032.82	6269.01	6456.69	5169.3	1179.88
1512.99	3732.29	4287.86	4997.92	6228.48	6459.43	5141.2	1188.87
1514.99	3708.8	4273.61	4971.1	6197.38	6448.34	5119.85	1189.04
1516.99	3693.88	4270.61	4944.14	6183.52	6433.02	5105.03	1187.46
1518.99	3687.74	4284.33	4927.58	6178.8	6408.96	5097.48	1179.69
1520.99	3691.82	4321.07	4919.23	6172.74	6373.61	5095.69	1161.37
1522.98	3702.04	4383.95	4915.38	6165.72	6336.8	5100.78	1136.5
1524.98	3718.09	4465.12	4913.51	6164.16	6306.49	5113.48	1110.71
1526.98	3733.64	4558.35	4916.73	6170.52	6287.87	5133.42	1089.2
1528.98	3745.25	4653.92	4926.5	6191.59	6274.47	5158.35	1074.52
1530.98	3756.57	4740.42	4941.42	6235.92	6270.74	5189.01	1070.12
1532.98	3771.23	4809.91	4963.58	6294.77	6280.4	5223.98	1073.82
1534.98	3791.8	4863.85	4992.49	6357.5	6308.56	5262.84	1082.6
1536.98	3822	4901.67	5028.69	6424.54	6364.87	5308.36	1097.15
1538.97	3863.43	4920.47	5072.8	6487.08	6443.05	5357.36	1113.4
1540.97	3909.9	4918.82	5124.86	6545.79	6528.68	5405.61	1130.73
1542.97	3956.89	4901.31	5181.05	6596.16	6616.93	5450.47	1148.71
1544.97	3993.22	4872.39	5215.05	6634.7	6702.86	5483.64	1170.32
1546.97	4020.34	4836.91	5224.05	6668.67	6796.73	5509.34	1199.18
1548.97	4040.38	4801.35	5213.73	6692.87	6886.29	5526.92	1228.99
1550.97	4058.03	4775.44	5190.95	6711.01	6964.41	5539.97	1255.27
1552.96	4072.81	4770.16	5159.62	6728.75	7020.65	5550.4	1274.25
1554.96	4078.64	4776	5128.75	6752.96	7059.85	5559.24	1291.1
1556.96	4080.78	4780.33	5111.27	6787.5	7096.03	5571.18	1309.85
1558.96	4078.88	4779.85	5124.38	6817.21	7132.5	5586.56	1326.83
1560.96	4069.84	4773.75	5155.61	6845.95	7167.99	5602.63	1344.67
1562.96	4055.57	4763.84	5187.67	6880.78	7194.25	5616.42	1363.37
1564.96	4040.97	4751.13	5221.73	6925.31	7216.4	5631.11	1383.71
1566.96	4026.16	4734.43	5253.05	6970.05	7239.11	5644.56	1405.38
1568.95	4008.14	4708.71	5286.16	7000.71	7245.47	5649.84	1421.63
1570.95	3986.82	4675.5	5323.65	7022.29	7244.9	5650.63	1436.07
1572.95	3963.75	4640.57	5364.89	7039.79	7238.9	5649.58	1449.12
1574.95	3942.77	4611.87	5402.73	7053.53	7234.49	5649.08	1460.65
1576.95	3923.96	4587.79	5439.02	7063.11	7239.23	5650.62	1472.63
1578.95	3903.11	4563.73	5460.49	7069.97	7260.71	5651.6	1489.82
1580.95	3881	4546.6	5467.07	7057.99	7297.1	5649.95	1506.29
1582.94	3862.26	4538.22	5459.64	7034.97	7343.78	5647.77	1521.13
1584.94	3852.25	4526.96	5433.82	7006.44	7391.52	5642.2	1533.98
1586.94	3855.29	4511.9	5391.84	6977.96	7445.69	5636.54	1546.77
1588.94	3880.91	4496.04	5344.83	6958.72	7494.9	5635.08	1554.81
1590.94	3915.54	4478.81	5298.63	6941.18	7527.3	5632.29	1556.71
1592.94	3950.44	4459.97	5258.08	6920.4	7543.24	5626.43	1553.52
1594.94	3985.63	4443.54	5221.62	6900.7	7531.7	5616.64	1541.81
1596.94	4026.4	4433.87	5199.54	6880.41	7474.53	5602.95	1512.42
1598.93	4075.75	4438.89	5200.89	6853.1	7374.45	5588.62	1461.94
1600.93	4130.76	4457.92	5209.74	6822.36	7240.27	5572.21	1396.07
1602.93	4190.75	4474.26	5212	6787.15	7073.84	5547.6	1320.19
1604.93	4245.03	4482.66	5202.78	6742.87	6892.92	5513.25	1243.22
1606.93	4288.2	4487.48	5187.26	6694.45	6716.53	5474.78	1172.06
1608.93	4317.7	4491	5169.16	6646.43	6558.7	5436.6	1111.35
1610.93	4332.43	4486.59	5153.38	6599.04	6436.77	5401.64	1066.23
1612.92	4332.71	4472.01	5144.03	6559.67	6336.8	5369.05	1034.82
1614.92	4320.15	4448.43	5141.57	6537.04	6258.34	5341.11	1018.65
1616.92	4294.43	4418.52	5147	6536.67	6202	5319.72	1018.9
1618.92	4256.89	4385.93	5162.96	6550.57	6167.89	5304.85	1031.92
1620.92	4212.82	4355.83	5173.04	6571.84	6164.55	5295.61	1055.28
1622.92	4168.66	4332.27	5177.81	6593.17	6203.01	5294.99	1086.16
1624.92	4127.1	4325.69	5179.33	6612.34	6269.82	5302.85	1118.29
1626.92	4081.25	4327.27	5182.55	6628.13	6353.74	5314.59	1153.1
1628.91	4030.36	4333.84	5194.01	6632.67	6457.29	5329.64	1190.34
1630.91	3981.36	4345.19	5216.72	6636.73	6570.63	5350.13	1229.45
1632.91	3940.1	4363.67	5237.39	6644.59	6696.16	5376.38	1270.62
1634.91	3907.1	4391.77	5260.41	6654.75	6829.22	5408.65	1311.63
1636.91	3882.6	4428.8	5285.55	6651.46	6971.5	5443.98	1349.53
1638.91	3867.34	4473.81	5306.52	6642.02	7132.41	5484.42	1389.59
1640.91	3860.13	4527.49	5319.26	6625.81	7310.03	5528.54	1432.41
1642.9	3859.67	4581.19	5327.11	6607.94	7492.19	5573.62	1477.67
1644.9	3864.98	4621.58	5327.7	6591.71	7670.46	5615.28	1525.69
1646.9	3878.37	4649.42	5319.97	6580.9	7832.07	5652.15	1571.36
1648.9	3897.06	4668.94	5303.18	6568.09	7964.14	5680.28	1608.5
1650.9	3912.92	4683.33	5276.87	6546.86	8059.49	5695.89	1634.83
1652.9	3924.72	4693.39	5245.49	6511.97	8113.34	5697.78	1647.34
1654.9	3927.08	4700.53	5224.34	6469.11	8114.79	5687.17	1642.43
1656.9	3917.14	4705.68	5228.11	6422.23	8073.17	5669.27	1623.17
1658.89	3892.9	4707.28	5255.26	6375.17	7998.66	5645.85	1594.83
1660.89	3851.16	4705.28	5302.71	6333.94	7897.31	5618.08	1562.21
1662.89	3790.69	4701.82	5353.61	6302.5	7780.78	5585.88	1532.1
1664.89	3717.33	4701.47	5395.38	6286.58	7676.03	5555.36	1513.69
1666.89	3635.83	4706.23	5436.25	6287.76	7598.12	5532.84	1510.51
1668.89	3558.58	4719.56	5465.86	6300.94	7538.2	5516.63	1514.41
1670.89	3492.8	4730.35	5487.82	6323.8	7478.77	5502.71	1517.85
1672.88	3436.37	4736.37	5503.35	6357.5	7416.86	5490.09	1520.76
1674.88	3390.5	4734	5513.82	6397.08	7334.2	5473.92	1516.79
1676.88	3356.31	4718.26	5524.99	6433.96	7242.7	5455.24	1508.84
1678.88	3331.31	4690.27	5526.64	6469.47	7148.87	5433.31	1499.67
1680.88	3314.2	4654.38	5516.28	6511.63	7065.85	5412.47	1494.16
1682.88	3305.06	4616.88	5498.6	6559.15	7007.51	5397.44	1494.95
1684.88	3309.42	4586.13	5479.32	6608.22	6973.8	5391.38	1497.95
1686.88	3334	4571.62	5458.71	6652.04	6964.43	5396.16	1497.75
1688.87	3369.98	4572.35	5431.74	6674.44	6971.87	5404.07	1491.8
1690.87	3408.59	4582.82	5406.89	6676.98	6996.65	5414.39	1484.29
1692.87	3446.67	4598.75	5381.65	6666.09	7031.49	5424.93	1476.44
1694.87	3483.57	4613.49	5344.32	6648.5	7064.7	5430.92	1467.96
1696.87	3518.79	4627.64	5297.85	6628.55	7092.55	5433.07	1458.98
1698.87	3551.86	4644.02	5243.57	6611	7111.02	5432.3	1449.18
1700.87	3581.56	4655.43	5182.29	6590.73	7121.22	5426.25	1439.23
1702.86	3606.29	4659.77	5123.54	6570.79	7122.81	5416.64	1429.97
1704.86	3624.16	4653.48	5079.77	6556.48	7117.54	5406.29	1423.08
1706.86	3636.94	4634.91	5044.78	6557.49	7106.91	5396.21	1420.67
1708.86	3646.18	4601.57	5016.77	6568.91	7088.3	5384.35	1420.89
1710.86	3652.25	4550.66	5007.65	6580.96	7055.13	5369.33	1419.45
1712.86	3656.93	4484.3	5027.55	6582.09	7007.81	5351.74	1413
1714.86	3664.94	4404.29	5063.94	6580.69	6943.33	5331.44	1402.42
1716.86	3680.69	4316.5	5111.47	6576.11	6859.02	5308.76	1385.96
1718.85	3705.05	4228.9	5172.84	6570.66	6754.8	5286.45	1363.58
1720.85	3728.9	4140.9	5242.91	6564.69	6629.78	5261.44	1339.35
1722.85	3749.23	4057.41	5313.14	6556.97	6487.83	5232.92	1315.06
1724.85	3766.04	3992.79	5375.62	6546.33	6331.67	5202.49	1288.19
1726.85	3780.74	3943.36	5433.08	6513.13	6172.45	5168.55	1256.26
1728.85	3795.05	3919.03	5485.01	6455.84	6007.46	5132.48	1214.73
1730.85	3810.88	3919.88	5531.89	6376.9	5856.36	5099.18	1166.58
1732.84	3826.16	3936.07	5576.74	6281.42	5738.25	5071.73	1118.46
1734.84	3840.09	3969.62	5627.47	6175.98	5663.91	5055.41	1073.45
1736.84	3851.88	4020.24	5684.09	6076.55	5642.4	5055.03	1037.13
1738.84	3866.36	4078.18	5739.61	5983.24	5687.28	5070.94	1011.91
1740.84	3885.69	4137.45	5791.98	5915.44	5805.44	5107.2	1005.26
1742.84	3904.95	4200.52	5840.47	5877.89	5997.55	5164.28	1021.71
1744.84	3914.18	4272.98	5881.11	5869.05	6218.84	5231.23	1055.62
1746.84	3913.73	4358.55	5906.74	5882.08	6433.58	5298.94	1095.45
1748.83	3907.02	4455.91	5914.26	5912.9	6646.33	5367.28	1139.72
1750.83	3896.09	4548.78	5911.98	5946.43	6844.97	5429.65	1186.44
1752.83	3882.25	4626.16	5900.29	5985.01	7024.24	5483.59	1234.72
1754.83	3865.4	4691.62	5886.11	6028.43	7183.74	5531.06	1282.95
1756.83	3849.97	4746.13	5868.6	6067.74	7312.8	5569.05	1323.97
1758.83	3829.85	4791.44	5850.82	6105.64	7415.33	5598.62	1360.26
1760.83	3804.52	4822.76	5824.27	6143.68	7490.59	5617.16	1391.64
1762.82	3776.83	4836.3	5784.31	6178.11	7542.05	5623.52	1418.11
1764.82	3748.27	4834.54	5733.11	6201.36	7572.12	5617.88	1438.91
1766.82	3720.91	4820.63	5672.38	6222.9	7575.25	5602.42	1452
1768.82	3692.89	4797.43	5611.54	6246.54	7560.64	5581.81	1461.32
1770.82	3663.44	4766.9	5548.83	6274.36	7533.37	5557.38	1468.89
1772.82	3639.96	4734.25	5484.3	6305.63	7490.8	5530.99	1470.87
1774.82	3627.22	4712.81	5426.93	6341.08	7436.42	5508.89	1465.36
1776.82	3615.68	4696.19	5380.5	6385.07	7378.55	5491.2	1459.7
1778.81	3608.07	4677.43	5346.95	6437.95	7323.03	5478.69	1456.06
1780.81	3608.71	4657.57	5323.69	6497.46	7280.16	5473.52	1455.86
1782.81	3614.45	4638.18	5311.91	6557.69	7263.38	5477.12	1462.79
1784.81	3621.31	4615.95	5308.88	6622.15	7273.69	5488.4	1479.2
1786.81	3623.34	4595.25	5310.21	6678.98	7310.22	5503.6	1503.6
1788.81	3622.92	4577.58	5315.6	6727.49	7371.33	5522.98	1534.13
1790.81	3623.46	4568.82	5328.98	6767.4	7452.71	5548.27	1567.28
1792.8	3629.4	4568.69	5356.01	6801.59	7545.17	5580.17	1599.37
1794.8	3637.39	4568.35	5399.89	6828.22	7647.72	5616.31	1632.22
1796.8	3639.27	4559.28	5449.2	6844.86	7770.96	5652.71	1673.26
1798.8	3633.91	4543.95	5508.15	6855	7916.56	5691.51	1724.01
1800.8	3625.67	4523.89	5578.18	6860.86	8100.48	5737.82	1789.11
1802.8	3619.43	4500.19	5654.53	6864.19	8335.96	5794.86	1872.76
1804.8	3619.62	4474.91	5723.83	6864.74	8626.38	5861.9	1976.02
1806.8	3624.96	4454.12	5775.87	6846.44	8953.99	5931.08	2091.63
1808.79	3629.52	4435.58	5805.95	6806.37	9303.13	5996.11	2217.27
1810.79	3629.78	4406.92	5818.09	6751.41	9602.79	6041.8	2330.5
1812.79	3626.8	4369.64	5813.48	6684.71	9829.86	6064.9	2420.77
1814.79	3625.95	4324.36	5793.28	6609.97	9973.1	6065.33	2481.07
1816.79	3628.91	4271.1	5759.59	6530.65	10021.6	6042.37	2505.74
1818.79	3633.62	4211.51	5724.88	6457.31	9971.56	5999.78	2492.82
1820.79	3640.78	4151.56	5698.65	6389.77	9826.77	5941.51	2441.95
1822.78	3649.75	4104.58	5668.88	6324.74	9597.77	5869.14	2355.3
1824.78	3657.78	4067.63	5630.4	6268.74	9281.67	5781.24	2233.77
1826.78	3666.53	4036.66	5588.18	6225.31	8920.81	5687.5	2095.41
1828.78	3675.91	4014.63	5541.94	6194.27	8558.67	5597.08	1957.41
1830.78	3684.75	4006.68	5495.05	6188.12	8233.44	5521.61	1834.94
1832.78	3696.87	4014.19	5450.95	6211.6	8005.05	5475.73	1749.29
1834.78	3714.55	4037.45	5413.9	6266.39	7832.01	5452.86	1684.4
1836.78	3737.96	4072.73	5395.99	6332.91	7706.28	5449.17	1635.63
1838.77	3762.79	4112.87	5393.72	6397.57	7616.21	5456.63	1599.06
1840.77	3788.21	4156.04	5402.06	6463.91	7561.1	5474.26	1574.8
1842.77	3818.04	4193.87	5423.74	6528.86	7538.98	5500.7	1561.79
1844.77	3855.92	4226.65	5461.76	6586.55	7537.29	5533.63	1553.33
1846.77	3895.21	4256.61	5519.16	6633.91	7550.12	5571	1548
1848.77	3934.64	4279.86	5591.26	6671.85	7572.93	5610.11	1545.73
1850.77	3972.75	4291.86	5667.44	6707.62	7598.9	5647.71	1547.16
1852.76	4011.58	4294.67	5738.08	6751.96	7632.81	5685.82	1554.71
1854.76	4054.06	4289.24	5788.03	6809.69	7674.7	5723.14	1568.07
1856.76	4101.33	4273.97	5815.24	6884.21	7717.57	5758.46	1585.75
1858.76	4147.7	4247.2	5831.73	6968.69	7759.05	5790.87	1608.23
1860.76	4187.45	4205.55	5827.42	7039.32	7792.9	5810.53	1631.74
1862.76	4221.85	4150.28	5805.91	7104.48	7817.06	5819.92	1656.83
1864.76	4238.69	4084.6	5768.05	7168.69	7821.6	5816.33	1683.76
1866.76	4239.96	4020.14	5718.25	7225.85	7810.22	5802.88	1708.97
1868.75	4228.3	3960.98	5657.55	7280.25	7782.42	5781.9	1731.48
1870.75	4203.9	3899.9	5597.76	7309.65	7743.96	5751.03	1749.64
1872.75	4162.72	3839.56	5538	7306.51	7697.29	5708.82	1762.13
1874.75	4106.33	3785.96	5467.94	7275.63	7641.58	5655.49	1767.74
1876.75	4038.69	3748.13	5394.73	7224.44	7577.89	5596.78	1764.94
1878.75	3967.89	3723.21	5326.75	7157.92	7517.17	5538.59	1756.74
1880.75	3902.57	3713.34	5263.82	7083.74	7466.47	5485.99	1744.56
1882.74	3852.33	3725.69	5212.33	7010.35	7425.19	5445.18	1726.14
1884.74	3824.46	3762.6	5167.23	6953.29	7389.39	5419.39	1701.92
1886.74	3815.39	3810.33	5126.5	6911.87	7358.74	5404.57	1675.94
1888.74	3817.8	3870.5	5094.52	6868.61	7336.38	5397.56	1646.39
1890.74	3828.69	3942.37	5062.29	6829.88	7321.6	5396.97	1615.92
1892.74	3846.1	4023.68	5028.43	6795.22	7311.88	5401.06	1585
1894.74	3864.36	4113.01	4990.44	6757.36	7312.32	5407.5	1555.75
1896.74	3882.12	4199.8	4951.1	6717.29	7332.6	5416.58	1534.17
1898.73	3900.73	4282.72	4912.93	6674.07	7384.91	5431.07	1524.11
1900.73	3922.26	4356.23	4882.56	6623.53	7455.07	5447.93	1520.67
1902.73	3946.7	4416.45	4860.03	6564.96	7534.93	5464.61	1521.94
1904.73	3967.11	4463.38	4847.24	6501.15	7619.8	5479.73	1528.42
1906.73	3980.36	4499.51	4850.54	6427.91	7700.46	5491.75	1535.81
1908.73	3986.91	4528.59	4868.84	6343.71	7771.03	5499.82	1541.17
1910.73	3986.1	4554.25	4898.99	6253.87	7816.2	5501.88	1539.53
1912.72	3976.63	4577.77	4941.89	6163.72	7838.72	5499.74	1532.38
1914.72	3954.97	4602.3	4995.17	6090.91	7840.18	5496.71	1522.61
1916.72	3926.53	4628.14	5052.33	6032.77	7827.28	5493.41	1511.31
1918.72	3895.66	4654.95	5114.19	5992.15	7807.03	5492.8	1500.1
1920.72	3868.09	4681.49	5171.88	5965.48	7783.48	5494.08	1489.25
1922.72	3853.87	4706.9	5233.55	5941.99	7763.71	5500	1477.28
1924.72	3858.14	4727.09	5299.39	5928.12	7751.7	5512.89	1465.09
1926.72	3870.51	4734.47	5366.09	5923.14	7739.8	5526.8	1453.56
1928.71	3888.41	4728.15	5425.42	5918.61	7723.6	5536.84	1441.47
1930.71	3911.99	4709.99	5471.73	5920.98	7708	5544.54	1430.84
1932.71	3936.16	4682.81	5508.46	5931.16	7690.84	5549.89	1421.86
1934.71	3958.75	4647.7	5539.81	5940.99	7669.56	5551.36	1413.48
1936.71	3978.88	4610.16	5565.54	5937.82	7646.23	5547.73	1405.04
1938.71	3993.05	4576.37	5583.4	5918.49	7613.67	5537	1393.45
1940.71	3997.37	4538.46	5597.37	5885.17	7573.06	5518.29	1381.68
1942.7	3993.52	4493.38	5609.61	5846.26	7522.51	5493.06	1369.76
1944.7	3985.77	4445.2	5611.31	5805.58	7463.93	5462.36	1356.58
1946.7	3978.81	4400.46	5600.02	5773.88	7399.94	5430.62	1341.06
1948.7	3973.76	4364.43	5577.14	5753.24	7332.27	5400.17	1322.54
1950.7	3970.93	4337.44	5542.2	5732.36	7268.31	5370.25	1302.7
1952.7	3972.58	4319.9	5497.16	5700.41	7220.26	5342.06	1284.57
1954.7	3972.74	4309.58	5433.28	5662.53	7183.22	5312.27	1268.61
1956.7	3969.93	4304.48	5351.63	5620.23	7160.74	5281.4	1257.57
1958.69	3957.37	4303.98	5258.6	5567.14	7144.59	5246.34	1250.59
1960.69	3939.79	4306.68	5164.46	5507.06	7122.59	5208.12	1242.75
1962.69	3923.82	4304.08	5061.36	5445.47	7104.5	5167.85	1238.22
1964.69	3911.89	4298.87	4950.25	5390.62	7091.78	5128.68	1237.27
1966.69	3905.69	4289.1	4847.58	5359.21	7086.85	5097.69	1241.2
1968.69	3904.23	4271.41	4748.67	5344.06	7097.3	5073.13	1253.49
1970.69	3907.97	4243	4657.78	5344.86	7128.96	5056.51	1276.53
1972.68	3918.25	4204.26	4579.38	5362.23	7171.78	5047.18	1305.47
1974.68	3932.28	4155.42	4516.05	5393.5	7223.69	5044.19	1339.54
1976.68	3939.33	4102.41	4461.52	5429.82	7277.09	5042.04	1376.74
1978.68	3940.14	4044.95	4416.49	5476.07	7326.97	5040.93	1415.01
1980.68	3936.3	3982.49	4384.92	5525.55	7382.21	5042.29	1456.65
1982.68	3929.43	3923.57	4362.39	5578.52	7448.77	5048.54	1502.56
1984.68	3920.73	3871.78	4344.09	5633.93	7521.38	5058.38	1550.01
1986.68	3911.68	3828.43	4332.66	5689.99	7584.09	5069.37	1591.53
1988.67	3897.76	3799.7	4330.49	5744.33	7634.78	5081.41	1625.33
1990.67	3877.76	3780.87	4342.18	5792.03	7676.64	5093.9	1652.73
1992.67	3855.17	3769.48	4371.77	5847.22	7701.5	5109.03	1671.52
1994.67	3835	3765.56	4420.52	5919	7709.74	5129.97	1682.23
1996.67	3818.93	3768.79	4482.56	6008.27	7689.02	5153.51	1681.38
1998.67	3800.66	3779.06	4556.87	6103.88	7632.77	5174.65	1667.56
2000.67	3776.67	3797.22	4632.21	6207.67	7551.5	5193.05	1647.78
2002.66	3751.05	3827.31	4713.58	6311.93	7467.41	5214.25	1627.64
2004.66	3726.87	3864.5	4786.31	6406.92	7428.78	5242.68	1623.25
2006.66	3709.55	3905.18	4847.44	6497.88	7419.75	5275.96	1628.29
2008.66	3701.47	3948.38	4908.28	6567.41	7430.69	5311.25	1634.1
2010.66	3694.46	3998.77	4961.7	6609.34	7467.06	5346.27	1642.04
2012.66	3683.74	4049.67	5010.19	6629.36	7524.88	5379.57	1654.18
2014.66	3674.67	4098.08	5053.95	6631.16	7598.91	5411.35	1668.97
2016.66	3672.84	4144.51	5096.57	6614.73	7671.07	5439.94	1679.05
2018.65	3678.74	4190.9	5139.35	6584.73	7734.4	5465.62	1682.56
2020.65	3687.66	4239.67	5193.9	6545.57	7772.44	5487.85	1675.05
2022.65	3695.62	4284.69	5258.42	6500.16	7776.99	5503.17	1656.51
2024.65	3704.14	4321	5324.7	6461.5	7761.22	5514.51	1634.2
2026.65	3717.28	4346.97	5380.69	6439.02	7736.84	5524.16	1612.77
2028.65	3732.4	4356.84	5423.29	6430.21	7712.18	5530.98	1596.2
2030.65	3747.07	4348.62	5454.47	6420.65	7697.06	5533.58	1586.63
2032.64	3758.67	4324.73	5471.46	6412.49	7674.75	5528.42	1578.96
2034.64	3766.41	4289.24	5467.23	6414.44	7630.36	5513.54	1568.92
2036.64	3773.68	4246.02	5445.15	6431.75	7563.32	5491.98	1555.7
2038.64	3781.99	4202.72	5406.69	6460.33	7477.92	5465.93	1538.81
2040.64	3785.28	4158.42	5356.34	6494.61	7384.66	5435.86	1523.27
2042.64	3782.56	4120.28	5305.07	6523.41	7305.46	5407.36	1512.89
2044.64	3777.54	4089.45	5258.01	6545.56	7266.67	5387.45	1513.77
2046.64	3772.03	4059.59	5212.55	6560.24	7260.08	5372.9	1523.53
2048.63	3765.43	4027.36	5171.57	6560.38	7276.21	5360.19	1538.41
2050.63	3758.2	3995	5136.07	6555.84	7305.59	5350.14	1556.76
2052.63	3752.79	3968.87	5099.74	6537.79	7348.42	5341.52	1575.23
2054.63	3751.53	3944.54	5052.8	6513.81	7390.92	5330.72	1591.91
2056.63	3755.69	3924.2	4996.02	6486.78	7426.73	5317.88	1604.68
2058.63	3764.22	3910.05	4932.68	6464.15	7453.91	5305	1614
2060.63	3770.67	3904.52	4865.38	6454.96	7478.47	5294.8	1624.4
2062.62	3773.2	3907.83	4795.57	6438.72	7489.81	5281.03	1628.95
2064.62	3775.07	3908.36	4726.16	6417.02	7483.28	5261.98	1627.77
2066.62	3777.14	3910.57	4663.77	6395.53	7461.27	5241.65	1620.85
2068.62	3781.33	3919.63	4618.17	6377.04	7431.91	5225.62	1608.89
2070.62	3791.3	3938.35	4593.1	6363.49	7398.43	5216.94	1591.38
2072.62	3806.7	3965.56	4579.95	6359.68	7368.64	5216.11	1572.91
2074.62	3816.56	3991.65	4576.46	6352.2	7338.68	5215.11	1554.28
2076.62	3825.45	4011.06	4580.46	6337.73	7313.14	5213.57	1536.69
2078.61	3836.46	4021.3	4586.22	6320.84	7299.38	5212.84	1523.82
2080.61	3853.56	4021.11	4591.72	6304.01	7299.23	5213.93	1516.36
2082.61	3879.08	4011.65	4596.69	6283.23	7298.99	5213.93	1508.24
2084.61	3908.24	3998.69	4609.06	6258.63	7295.59	5214.04	1497.68
2086.61	3921.23	3982.19	4633.91	6233.66	7286.84	5211.57	1488.41
2088.61	3923.35	3963.41	4674.94	6208.38	7281.01	5210.22	1481.69
2090.61	3918.95	3943.17	4723.05	6183.77	7281.92	5210.17	1479.01
2092.6	3910.23	3930.6	4768.84	6162.64	7296.08	5213.68	1481.56
2094.6	3898.73	3930.06	4814.12	6150.45	7325.31	5223.73	1489.33
2096.6	3884.54	3936.16	4854.34	6146.74	7363.62	5237.08	1501.49
2098.6	3871.9	3946.99	4878.44	6137.86	7410.99	5249.23	1516.02
2100.6	3866.79	3962.28	4886.76	6119.77	7464.09	5259.94	1529.84
2102.6	3872.96	3978.93	4886.23	6091.06	7526.91	5271.22	1543.83
2104.6	3885.09	4000.77	4877.51	6055.2	7585.65	5280.84	1554.12
2106.6	3894.62	4030.29	4864.13	6015.73	7644.56	5289.87	1564.13
2108.59	3894.92	4066.92	4841.18	5979.54	7691.07	5294.73	1571.95
2110.59	3890.88	4101.16	4811.73	5944.51	7728.14	5295.28	1578.95
2112.59	3883.18	4130	4781.51	5902.36	7758.98	5291.21	1585.42
2114.59	3873	4155.49	4754.44	5853.99	7782.23	5283.83	1589.89
2116.59	3862.19	4180.4	4726.42	5807.6	7801.33	5275.59	1593.82
2118.59	3856.57	4201.91	4705.4	5773.93	7822.58	5272.08	1598.98
2120.59	3856.15	4217.94	4690.51	5755.15	7840.93	5272.14	1603.64
2122.58	3859.48	4229.16	4680.81	5742.57	7846.75	5271.75	1603.35
2124.58	3869.78	4226.39	4673.11	5739.55	7840.02	5269.77	1599.33
2126.58	3888.04	4211.47	4668.57	5747.28	7823.49	5267.77	1592.18
2128.58	3911.48	4186.07	4668.87	5751.48	7796.58	5262.9	1580.9
2130.58	3935.35	4153.01	4677.6	5760.48	7760.91	5257.47	1567.19
2132.58	3952.84	4114.21	4693.59	5778.64	7723.58	5252.57	1555.65
2134.58	3958.43	4073.34	4717.16	5810.68	7704.18	5252.76	1555.15
2136.58	3949.45	4038.45	4743.44	5862.53	7711.7	5261.11	1569.27
2138.57	3927.27	4002.58	4776.07	5915.78	7736.76	5271.69	1593.36
2140.57	3897.28	3960.26	4808.98	5968.27	7784.35	5283.83	1629.49
2142.57	3863.96	3912.75	4840.1	6008.49	7851.89	5295.44	1674.23
2144.57	3830.8	3860.92	4860.98	6038.71	7926.45	5303.57	1722.36
2146.57	3805.83	3786.99	4872.58	6070.24	8004.04	5307.94	1775.47
2148.57	3793.02	3691.08	4883.61	6099.13	8089.47	5311.26	1833.85
2150.57	3790.76	3561.63	4898.25	6130.04	8158.6	5307.86	1892.18
2152.56	3797.83	3385.44	4921.7	6166.26	8199.45	5294.13	1950.78
2154.56	3815.28	3140.44	4953.44	6204.55	8203.36	5263.42	2014.27
2156.56	3840.62	2816.49	4992.62	6229.59	8170.67	5210	2089.05
2158.56	3863.57	2413.3	5027.5	6232.02	8110.82	5129.44	2184.86
2160.56	3874.47	1943.72	5057.01	6214.56	8025.26	5023	2304.11
2162.56	3875.49	1442.01	5083.41	6182.63	7916.28	4899.96	2438.44
2164.56	3871.11	993.418	5108.5	6140.74	7795.71	4781.89	2560.19
2166.56	3862.43	768.831	5134.02	6093.42	7672.13	4706.17	2603.79
2168.55	3847.35	485.571	5156.61	6043.36	7544.66	4615.51	2671.98
2170.55	3825.38	305.912	5172.73	5995.12	7410	4541.83	2701.52
2172.55	3801.3	161.718	5180.21	5947.68	7268.44	4471.87	2716.97
2174.55	3778.97	66.02	5175.67	5909.18	7128.2	4411.61	2715.27
2176.55	3767.93	6.80491	5160.14	5876.33	6997.36	4361.71	2701.67
2178.55	3768.58	0	5132.65	5856.92	6880.99	4327.83	2671.49
2180.55	3778.81	58.1443	5095.85	5849.18	6779.91	4312.38	2619.52
2182.54	3797.54	191.668	5054.13	5837.95	6699.89	4316.24	2540.82
2184.54	3827.4	417.682	5006.33	5821.85	6628.87	4340.43	2425.19
2186.54	3869	742.198	4955.44	5805.17	6572.52	4388.87	2272.87
2188.54	3916.52	1165.58	4904.75	5787.86	6543.8	4463.7	2088.77
2190.54	3969.62	1678.05	4850.7	5770.32	6555.27	4564.79	1883.12
2192.54	4018.43	2176.84	4796.71	5751.75	6597.64	4668.27	1698.7
2194.54	4052.51	2542.1	4744.45	5735.1	6655.74	4745.98	1578.25
2196.54	4075.89	2867.11	4696.55	5726.07	6733.37	4819.8	1488.68
2198.53	4091.95	3116.89	4652.89	5714.96	6829.91	4881.32	1438.79
2200.53	4099.15	3293.44	4614.5	5708.34	6936.4	4930.36	1422.99
2202.53	4100.19	3413.01	4581.04	5713.89	7046.74	4970.97	1431.63
2204.53	4098.15	3506.1	4551.15	5733.67	7161.81	5010.18	1454.11
2206.53	4097.3	3568.84	4525.75	5769.62	7251.17	5042.53	1478.09
2208.53	4093.34	3622.77	4509.01	5829.63	7302.83	5071.51	1493.79
2210.53	4078.91	3670.32	4500.31	5922.4	7323.06	5099	1505.37
2212.52	4054.91	3715.79	4502.35	6031.87	7325.74	5126.13	1515.28
2214.52	4020.95	3762.08	4511.71	6148.61	7312.09	5151.09	1523.18
2216.52	3975.99	3812.46	4522.62	6263.87	7284.06	5171.8	1529.17
2218.52	3922.28	3861.09	4534.82	6358.42	7249.87	5185.3	1533.83
2220.52	3859.25	3905.03	4554.09	6433.64	7212.07	5192.82	1538
2222.52	3792.04	3939.67	4582.36	6485.7	7169.87	5193.93	1539.93
2224.52	3728.66	3961.1	4619.83	6518.89	7125.56	5190.81	1539.74
2226.52	3676.12	3971.02	4668.85	6530.58	7086.27	5186.57	1536.41
2228.51	3631.82	3975.36	4720.83	6535.48	7062.37	5185.17	1536.18
2230.51	3593.08	3978.23	4776.63	6536.14	7057.21	5188.26	1540.13
2232.51	3557.12	3980.79	4829.73	6538.08	7066.24	5194.39	1548.85
2234.51	3524.83	3979.57	4883.55	6541.2	7089.39	5203.71	1562.39
2236.51	3493.98	3975.36	4942.02	6552	7127.02	5218.08	1582.44
2238.51	3465.34	3973.57	4999.96	6573.81	7157.24	5233.98	1602
2240.51	3442.6	3983.29	5046.72	6604.63	7170.86	5249.62	1615.34
2242.5	3428.83	4003.95	5085.32	6618.86	7167.18	5260.83	1615.95
2244.5	3420.75	4031.45	5116.14	6625.11	7137.65	5266.22	1604.82
2246.5	3416.37	4064.48	5134.81	6618.91	7084.84	5263.88	1582.76
2248.5	3414.61	4099.42	5151.34	6596.78	7015.8	5255.59	1551.93
2250.5	3421.19	4135.54	5166.03	6550.45	6938.7	5242.38	1511.31
2252.5	3438.44	4171.88	5179.45	6486.13	6864.66	5228.11	1464.74
2254.5	3468.33	4203.04	5194.72	6406.96	6810.87	5216.79	1418
2256.5	3502.02	4222.74	5203.28	6319.47	6784	5206.3	1378.43
2258.49	3537.74	4232.77	5191.89	6242.28	6785.75	5198.09	1350.89
2260.49	3572.27	4236.21	5163.94	6182.68	6813.37	5193.69	1336.8
2262.49	3602.94	4225.75	5127.55	6128.33	6851.26	5187.17	1331.6
2264.49	3628.83	4200.84	5086.87	6070.02	6891.23	5175.56	1331.72
2266.49	3652.34	4160.25	5049.28	6012.23	6921.22	5159.07	1333.51
2268.49	3675.82	4108.22	5016.63	5957.87	6937.63	5139.23	1334.54
2270.49	3698.01	4053.1	4987.81	5910.39	6931.56	5116.17	1330.81
2272.49	3717.06	3994.47	4958.7	5873.21	6912.25	5091.14	1326.31
2274.48	3729.11	3930.41	4923.43	5845.99	6889.96	5063.78	1325.93
2276.48	3734.76	3873.64	4885.1	5830.81	6868.89	5038.64	1328.37
2278.48	3739.45	3829.29	4847.19	5829.29	6854.88	5020.02	1333.15
2280.48	3752.31	3800.9	4811.32	5838.79	6848.16	5010.3	1336.87
2282.48	3775.06	3790.46	4775.51	5854.35	6849.12	5008.9	1338.15
2284.48	3801.94	3795.83	4746.14	5875.79	6854.22	5014.78	1337.34
2286.48	3832	3812.9	4727.09	5890.5	6871.7	5026.84	1336.09
2288.47	3863.36	3839.22	4717.71	5896.58	6893.83	5042.14	1332.35
2290.47	3893.14	3874	4711.82	5904.47	6906.3	5057.95	1323.95
2292.47	3923.94	3917.55	4712.11	5903.05	6906.23	5072.57	1307.23
2294.47	3954.74	3962.56	4720.19	5899.93	6887.39	5084.96	1282.88
2296.47	3988.86	3999.7	4737.61	5903.22	6863.03	5098.48	1257.98
2298.47	4026.51	4030.59	4756.78	5912.48	6837.54	5112.78	1234.12
2300.47	4064.75	4057.71	4775.16	5934.15	6816.67	5129.69	1214.7
2302.47	4100.61	4075.45	4794.09	5963.32	6808.62	5148.42	1203.65
2304.46	4137.09	4081.24	4806.97	5981.2	6822	5165.7	1201.16
2306.46	4178.26	4080.46	4814.43	5990.44	6850.43	5182.81	1203.45
2308.46	4223.27	4073.71	4814.76	5991.05	6890.11	5198.58	1209.67
2310.46	4268.11	4066.39	4806.45	5986.37	6934.74	5212.41	1218.12
2312.46	4299.53	4066.95	4790.24	5983.73	6987.25	5225.54	1231.65
2314.46	4314.73	4067.5	4768.22	5986.96	7040.85	5235.65	1250.44
2316.46	4310.7	4064.28	4742.18	5993.07	7098.05	5241.65	1276.05
2318.45	4290.21	4068.46	4716.45	6003.57	7159.24	5247.59	1305.27
2320.45	4252.5	4083.22	4689.96	6018.9	7210.04	5250.92	1332.57
2322.45	4199.38	4100.56	4662.13	6041.48	7249.86	5250.68	1359.82
2324.45	4136.99	4114.01	4631.95	6077.79	7274.88	5247.12	1387.14
2326.45	4076.03	4122.17	4594.96	6133.67	7272.78	5239.92	1409.9
2328.45	4029.41	4129.32	4554.19	6203.24	7251.42	5233.52	1426.79
2330.45	3998.04	4140.74	4513.06	6270.6	7219.5	5228.39	1436.94
2332.45	3971.35	4151.85	4476.11	6335.35	7182.81	5223.49	1444.82
2334.44	3954.51	4153.29	4441.95	6387.23	7148.03	5217	1451.24
2336.44	3947.74	4147.07	4413.86	6422.1	7117.98	5209.75	1454.86
2338.44	3952.21	4131.94	4390.47	6440.74	7092.75	5201.62	1455.59
2340.44	3955.07	4111.25	4373.55	6442.51	7079.81	5192.44	1457.35
2342.44	3957.53	4088.48	4363.46	6425.16	7086.88	5184.3	1461.09
2344.44	3957.23	4065.69	4362.35	6392.02	7104.87	5176.43	1464.53
2346.44	3952.05	4045.98	4363.3	6347.95	7126.71	5167.2	1467.46
2348.43	3937.71	4026.71	4367.37	6300.5	7145.27	5155.51	1470.42
2350.43	3920.62	4012.02	4375.26	6252.65	7148.83	5141.88	1467.77
2352.43	3906.32	4007.68	4385.09	6200.89	7134.12	5126.82	1455.61
2354.43	3896.95	4012.91	4392.47	6145.45	7111.61	5111.88	1437.75
2356.43	3896.5	4018.6	4403.22	6094.74	7082.77	5099.17	1416.35
2358.43	3906.61	4026.06	4422.54	6050.63	7044.28	5090.03	1389.24
2360.43	3915.92	4035.49	4451.13	6015.91	6997.98	5083.29	1359.79
2362.43	3926.43	4042.7	4484.19	5985.84	6947.97	5077.43	1329.62
2364.42	3940.87	4048.25	4522.21	5964.35	6897.06	5074.55	1299.7
2366.42	3956.58	4049.96	4562.73	5953.77	6848.24	5074.26	1272.85
2368.42	3972.39	4045.75	4604.75	5945.81	6802.41	5074.22	1248.85
2370.42	3986.99	4034.95	4643.6	5941.32	6766.86	5074.74	1231.31
2372.42	4002.56	4019.01	4684.46	5938.2	6740.83	5077.01	1218.39
2374.42	4020.38	3996.95	4732.07	5928.97	6723.62	5080.4	1208.21
2376.42	4032.57	3966.46	4779.73	5912.59	6715.77	5081.42	1203.76
2378.41	4040.15	3927.29	4827.75	5887.8	6723.16	5081.23	1206.87
2380.41	4044.84	3884.31	4871.41	5855.73	6742.06	5079.67	1215.42
2382.41	4040.33	3836.84	4911	5822.56	6778.43	5077.83	1233.99
2384.41	4027.66	3780.56	4948.99	5793.66	6832.45	5076.66	1264.27
2386.41	4011.31	3714.76	4977.55	5776.02	6901.86	5076.3	1305.76
2388.41	3994.46	3644.75	4989.18	5777.14	6978.23	5076.75	1354.24
2390.41	3978.22	3576.31	4993.45	5795.94	7060.04	5080.79	1406.73
2392.41	3964.01	3510.2	4994.45	5816.65	7138.61	5084.78	1457.52
2394.4	3950.71	3450.61	4993.53	5839.46	7204.89	5087.84	1502.44
2396.4	3939.2	3403.29	4988.78	5865.11	7245.56	5088.39	1535.15
2398.4	3931.48	3371.24	4980.6	5893.46	7256.34	5086.62	1552.96
2400.4	3927.88	3353.64	4972.11	5920.29	7240.79	5082.94	1556.79
2402.4	3921.15	3353.97	4965.73	5949.24	7210.08	5080.03	1551.45
2404.4	3908.66	3372.52	4961.3	5974.72	7169.31	5077.3	1538.45
2406.4	3885.52	3408.2	4956.53	5991.31	7128.77	5074.07	1521.9
2408.39	3850.63	3454.86	4951.51	6002.33	7093.02	5070.47	1505.94
2410.39	3805.48	3507.66	4946.68	6017.19	7071.05	5069.61	1496.37
2412.39	3750.9	3567.32	4940.28	6037.89	7057.51	5070.78	1491.8
2414.39	3690.33	3635.29	4928.62	6054.43	7055.2	5072.77	1490.97
2416.39	3630.85	3710.61	4913.72	6060.61	7065.78	5076.31	1492.29
2418.39	3576.88	3789.58	4897.84	6060.38	7087.23	5082.38	1495.64
2420.39	3523.5	3867.24	4879.84	6059.24	7118.01	5089.57	1503.79
2422.39	3469.8	3941.04	4856.14	6058.37	7145.42	5094.15	1513.46
2424.38	3419	4007.83	4827.5	6056.99	7172.98	5096.86	1525.28
2426.38	3372.58	4060.02	4796.23	6050.8	7197.75	5095.48	1538.04
2428.38	3337.8	4100.11	4761.89	6036.26	7216.6	5090.53	1547.22
2430.38	3320.25	4129.8	4724.73	6018.93	7235.13	5085.77	1553.37
2432.38	3316.59	4151.58	4683.69	6004.67	7252.94	5081.89	1557.67
2434.38	3330.41	4164.09	4638.8	5993.94	7276.2	5080.69	1561.5
2436.38	3355.38	4172.86	4589.81	5972.23	7301.64	5078.38	1562.79
2438.37	3387.93	4182.31	4536.43	5938.7	7321.55	5073.38	1559.34
2440.37	3431.12	4190.9	4481.17	5901.99	7331.6	5067.36	1550.2
2442.37	3485.26	4195.57	4428.74	5865.74	7347.39	5064.54	1541.66
2444.37	3549	4193.12	4388.56	5838.41	7375.1	5068.84	1537.1
2446.37	3615.1	4181.14	4361.79	5822.47	7408.92	5077.88	1536.62
2448.37	3679.14	4163.38	4347.19	5805.92	7445.13	5088.15	1537.86
2450.37	3734.98	4143.63	4345.15	5797.44	7484.26	5101.09	1542.63
2452.37	3779.85	4119.9	4354.4	5801.04	7531.14	5117.27	1554
2454.36	3813.22	4091.45	4366.93	5824.34	7586.76	5136.54	1574.19
2456.36	3833.22	4060.6	4380.78	5854.42	7641.63	5154.13	1598.18
2458.36	3839.32	4029.46	4390.96	5888.94	7685.56	5166.85	1621.98
2460.36	3831.53	3998	4392.55	5930.68	7713.78	5173.31	1644.61
2462.36	3813.28	3969.51	4397.25	5965.77	7734.27	5176.02	1664.9
2464.36	3788.75	3944.83	4405.47	5990.58	7752.32	5176.39	1683.37
2466.36	3761.77	3920.37	4414.67	6007.25	7764.04	5173.62	1698.91
2468.35	3732.59	3894.1	4422.47	6010.57	7769.16	5165.78	1711.36
2470.35	3701.31	3864.95	4433.9	5985.3	7765.56	5150.2	1717.68
2472.35	3665.82	3833.39	4451.98	5941.27	7747.76	5128.04	1717.23
2474.35	3626.88	3799.27	4477.86	5885.25	7723.44	5102.54	1713.77
2476.35	3584.66	3760.71	4510	5823.87	7692.29	5074.31	1708.71
2478.35	3540.44	3720.37	4548.39	5768.35	7653.02	5046.11	1702.2
2480.35	3504.6	3681.14	4596.88	5729.69	7600.55	5022.57	1690.48
2482.35	3473.59	3645.92	4654.51	5712.35	7538.69	5005.01	1675.94
2484.34	3445.18	3615.34	4714.53	5707.79	7473.92	4991.35	1661.11
2486.34	3422.29	3598.96	4772.07	5718.45	7404.71	4983.3	1643.28
2488.34	3408.07	3598.82	4826.99	5742.26	7329.06	4981.04	1620.28
2490.34	3406.54	3613.37	4882.36	5768.56	7253.17	4984.8	1592.33
2492.34	3414.32	3640.85	4932.71	5798.77	7192.88	4995.91	1566.27
2494.34	3425.25	3679.07	4972.59	5832.1	7147.76	5011.35	1543.54
2496.34	3443.44	3725.59	5006.67	5876.68	7103.94	5031.26	1519.64
2498.33	3469.93	3773.18	5036.5	5928.88	7065.15	5054.73	1496.68
2500.33	3503.2	3815.67	5060.53	5988.11	7034.18	5080.34	1477.22
2502.33	3526.08	3847.72	5079.96	6049.34	7012.89	5103.2	1466.81
2504.33	3535.14	3868.62	5098.77	6104.86	6987.13	5118.9	1460.68
2506.33	3534.94	3879.05	5120.92	6161.25	6953.36	5129.9	1457.5
2508.33	3529.05	3881.44	5144.38	6226.57	6919.24	5140.14	1459.92
2510.33	3520.45	3878.47	5164.57	6293.67	6888.04	5149.04	1466.39
2512.33	3513.24	3867.58	5176.93	6337.39	6862.23	5151.47	1471.9
2514.32	3511.01	3854.17	5181.17	6364.08	6852.29	5152.54	1478.02
2516.32	3513.69	3846.69	5178.45	6371.74	6860.53	5154.22	1482.85
2518.32	3514.84	3848.64	5168.04	6364.74	6874.16	5154.09	1484.57
2520.32	3512.54	3857.4	5153.3	6350.05	6895.23	5153.7	1486.44
2522.32	3511.39	3869.54	5136.68	6329.27	6919.36	5153.25	1487.12
2524.32	3516.15	3881.23	5116.79	6301.76	6947.37	5152.66	1486.39
2526.32	3525.81	3888.19	5094.15	6267.96	6979.17	5151.06	1485.68
2528.31	3540.61	3891.67	5076.55	6230.52	7017.64	5151.4	1486.15
2530.31	3560.61	3890.76	5064.18	6189.67	7064.7	5153.99	1488.8
2532.31	3583.28	3887.22	5050.07	6145.44	7116.36	5156.47	1493.02
2534.31	3609.46	3877.09	5027.6	6105.82	7169.49	5157.89	1500.01
2536.31	3637.15	3859.53	4996.44	6074.71	7226.28	5158.82	1511.89
2538.31	3665.65	3834.2	4959.19	6050.63	7282.87	5158.51	1527.33
2540.31	3697.88	3804.12	4918.66	6042.6	7335.92	5159.84	1545
2542.31	3730.54	3771.95	4877.28	6047.97	7372.02	5159.95	1559.77
2544.3	3757.95	3741.17	4840.1	6056.67	7384.25	5156.03	1567.83
2546.3	3775.37	3715.67	4810.62	6067.44	7379.46	5149.71	1571.17
2548.3	3780.44	3695.45	4791.35	6089.42	7368.48	5145.03	1575.13
2550.3	3776.47	3680.97	4780.72	6122.42	7350.92	5142.3	1578.79
2552.3	3765.19	3672.33	4777.99	6168.02	7328.17	5142.34	1582.73
2554.3	3748.15	3669.42	4777.4	6218.24	7311.79	5145	1589.85
2556.3	3726.49	3674.79	4777.43	6264.89	7306.8	5150.08	1599.7
2558.29	3704.7	3684.67	4778.71	6303.59	7323.67	5159.07	1614.71
2560.29	3682.64	3693.59	4779.93	6343.46	7353.85	5170.69	1634.81
2562.29	3652.53	3703.82	4785.05	6382.83	7388.27	5182.5	1657.67
2564.29	3616.03	3711.29	4794.32	6421.4	7417.76	5192.16	1680.76
2566.29	3582.16	3715.11	4807.24	6468.31	7441.43	5202.85	1703.61
2568.29	3557.49	3715.33	4825.53	6523.89	7454.08	5215.27	1722.98
2570.29	3549.17	3707.96	4849.35	6585.01	7460.28	5230.35	1739.03
2572.29	3556.22	3692.24	4877.52	6638.95	7459.91	5244.97	1749.78
2574.28	3573.08	3671	4902.45	6688.59	7460.71	5259.16	1759.44
2576.28	3593.67	3648.1	4917.95	6722.38	7463.07	5269.03	1766.6
2578.28	3607.41	3627.56	4920.6	6739.22	7468.46	5272.65	1773.11
2580.28	3616.69	3609	4916.65	6743.53	7478.86	5272.95	1779.57
2582.28	3623.34	3594.32	4908.75	6735.12	7488.54	5270.01	1783.14
2584.28	3623.6	3592.08	4895.69	6711.25	7493.28	5263.18	1780.88
2586.28	3618.05	3605.46	4875.63	6671.95	7495.92	5253.4	1772.99
2588.27	3606.4	3629.47	4843.34	6621.09	7491.93	5238.45	1760.57
2590.27	3588.86	3659.85	4800.78	6565.4	7492.48	5221.47	1749.62
2592.27	3565.6	3691.62	4750.02	6505.16	7503.03	5203.09	1743.29
2594.27	3535.88	3722.47	4698.54	6447.71	7517.9	5184.5	1741.56
2596.27	3500.81	3754.47	4652.37	6396.87	7533.43	5167.59	1742.76
2598.27	3466.71	3785	4611.92	6350.55	7549.22	5152.68	1745.26
2600.27	3438.22	3810.95	4579.21	6312.24	7559.51	5140.02	1746.79
2602.27	3417.52	3829.59	4562.91	6278.88	7560.77	5129.94	1744.55
2604.26	3403.53	3844.24	4561.37	6251.63	7545.56	5121.27	1735.64
2606.26	3395.21	3855.99	4570.97	6232.09	7517.67	5114.39	1721.88
2608.26	3389.73	3861.39	4581.79	6216.1	7486.2	5107.04	1707.86
2610.26	3381.43	3861.83	4599.48	6200.68	7456.33	5099.95	1695.65
2612.26	3369.95	3857.31	4627.4	6191.46	7439.28	5097.08	1689.99
2614.26	3357.84	3849	4665.62	6191.42	7436.27	5100.03	1691.02
2616.26	3340.78	3840.35	4708.63	6201.15	7438.45	5105.87	1696.72
2618.25	3316.93	3832.29	4753.57	6216.78	7441.05	5112.12	1705.39
2620.25	3290.79	3824.59	4800.35	6240.31	7441.74	5119.56	1715.5
2622.25	3263.33	3818.05	4845.51	6266.49	7439.62	5126.6	1725.72
2624.25	3240.37	3811.93	4885.65	6304.33	7428.66	5134.19	1734.25
2626.25	3221.21	3807.99	4917.79	6339.22	7408.1	5138.86	1738.38
2628.25	3210.04	3804.69	4943.33	6364.75	7380.49	5140.66	1736.83
2630.25	3208.56	3801.53	4956.92	6380.64	7334.39	5136.41	1725.54
2632.25	3216.06	3796.23	4965.56	6392.79	7284.81	5131.09	1710.77
2634.24	3228.17	3788.6	4972.92	6393.97	7238.17	5124.37	1694.32
2636.24	3244.28	3777.72	4982.29	6381.81	7205.51	5118.32	1679.32
2638.24	3263.4	3761.78	4987.38	6359.41	7184.6	5111.32	1666.41
2640.24	3288.84	3739.42	4989.35	6331.52	7167.31	5103.29	1653.34
2642.24	3319.03	3711.34	4989.3	6301.18	7153.69	5094.91	1641.1
2644.24	3350.96	3678.17	4991.72	6271.36	7135.16	5085.47	1628.29
2646.24	3380.13	3642.1	4998.61	6245.42	7106.52	5074.56	1614.66
2648.23	3407.35	3605.5	5009.36	6212.34	7073.16	5061.54	1599.22
2650.23	3434.06	3568.68	5021.91	6179.31	7031.77	5047.14	1581.86
2652.23	3459.77	3530.64	5033.96	6146.88	6982.26	5030.7	1563.04
2654.23	3485.06	3493.09	5040.87	6115.54	6932.62	5013.44	1544.83
2656.23	3510.85	3459.71	5043.56	6089.54	6892.52	4999.24	1529.76
2658.23	3535.71	3432.66	5039.01	6073.53	6869.68	4990.12	1520.68
2660.23	3559.4	3415.67	5027.64	6067.81	6872.21	4988.55	1519.12
2662.23	3580.58	3405.77	5009.09	6077.26	6897.14	4993.97	1526.1
2664.22	3596.73	3404.06	4980.5	6095.05	6938.8	5003.03	1539.04
2666.22	3608.7	3409.64	4941.19	6111.03	6991.26	5012.36	1554.6
2668.22	3618.61	3427.43	4895.16	6119.63	7056.83	5023.53	1571.11
2670.22	3629.16	3459.62	4843.78	6114.8	7130.09	5035.49	1585.1
2672.22	3640.97	3506.08	4795.22	6101.66	7205.85	5049.96	1595.9
2674.22	3650.76	3562.67	4746.94	6077.07	7274.53	5062.4	1601.91
2676.22	3653.29	3624.27	4694.94	6049.42	7331.79	5070.74	1605.68
2678.21	3647.61	3688.11	4637.66	6023.75	7366.56	5072.74	1604.96
2680.21	3632.28	3755.71	4577.73	6004.92	7384.47	5071.02	1602.15
2682.21	3608.76	3823.32	4517.73	6000.55	7399.37	5069.95	1603.62
2684.21	3579.27	3887.3	4466.53	6000.62	7414.35	5069.61	1608.36
2686.21	3550.19	3942.96	4423.79	5993.97	7431.59	5068.5	1614.66
2688.21	3529.76	3991.84	4393.79	5986.01	7455.38	5071.36	1621.82
2690.21	3523.74	4032.19	4382.39	5967.63	7483.02	5077.79	1625.49
2692.21	3524.6	4061.81	4392.97	5937.17	7510.51	5085.41	1625.58
2694.2	3532.89	4082.39	4421.46	5903.34	7534.45	5094.91	1622
2696.2	3548.81	4096.11	4465.07	5869.44	7556.18	5107.12	1615.68
2698.2	3568.33	4101.31	4519.81	5838.75	7576.25	5120.89	1608.99
2700.2	3587.86	4099.81	4580.47	5812.69	7585.33	5133.23	1599.7
2702.2	3606.84	4091.83	4642.06	5795.78	7581.91	5143.68	1588.24
2704.2	3623.93	4075.82	4701.62	5795.38	7569.56	5153.26	1577.54
2706.2	3634.98	4052.62	4761.87	5812.72	7553.29	5163.1	1570.38
2708.19	3638.96	4022.84	4813.13	5844.41	7537.65	5171.4	1569.08
2710.19	3636.1	3983.57	4863.81	5879.63	7527.92	5178.2	1574.58
2712.19	3626.25	3933.01	4909.36	5915.05	7521.65	5181.06	1586.35
2714.19	3612.52	3874.29	4953.87	5941.73	7516.14	5179.71	1600.84
2716.19	3595.2	3813.32	4992.4	5950.86	7513.96	5173.15	1616.78
2718.19	3575.83	3749.14	5023.46	5949.34	7511.77	5161.91	1633.45
2720.19	3556.45	3682.43	5046.36	5940.41	7512.53	5147.64	1651.53
2722.19	3538.91	3614.32	5062.95	5928.24	7508.55	5130.59	1667.94
2724.18	3524.71	3547.17	5077.54	5916.66	7504.59	5114.13	1683.84
2726.18	3517.37	3484.11	5092.64	5906.72	7502.83	5100.73	1698.55
2728.18	3521.56	3427.41	5106.63	5896.64	7500.37	5090.52	1709.17
2730.18	3537.43	3379.25	5122.71	5886.25	7498.54	5084.83	1715.6
2732.18	3557.58	3338.88	5138.93	5874.9	7502.43	5082.54	1721.39
2734.18	3575.67	3310.85	5158.01	5865.17	7512.33	5084.41	1727.11
2736.18	3589.47	3294.31	5180.19	5856.51	7516.32	5087.36	1729.07
2738.17	3595.2	3288.7	5201.3	5840.02	7508.51	5086.75	1725.05
2740.17	3593.37	3289.43	5221.09	5811.84	7500.01	5083.15	1719.6
2742.17	3585.99	3291.07	5239.5	5780.05	7490.23	5077.37	1714.43
2744.17	3575.56	3290.84	5256.37	5746.56	7473.92	5068.65	1708.07
2746.17	3562.64	3291.01	5272.73	5713.3	7448.58	5057.65	1699.17
2748.17	3548.93	3291.35	5288.07	5685.16	7417.62	5046.22	1689.06
2750.17	3534.26	3293.21	5299.17	5656.43	7383.96	5033.41	1677.77
2752.17	3519.17	3297.34	5300.77	5630.49	7353.76	5020.31	1667.18
2754.16	3504.77	3302.79	5291.74	5612.2	7327.11	5007.72	1657.66
2756.16	3493.54	3305.52	5256.22	5609.29	7302.05	4993.32	1649
2758.16	3484.39	3309.1	5178.16	5622.67	7275.44	4973.95	1639.36
2760.16	3475.92	3317.44	5044.59	5639.76	7244.4	4944.42	1626.88
2762.16	3467.74	3330.42	4836.89	5655.8	7202.98	4898.77	1611.98
2764.16	3461.24	3350.26	4536.2	5674.31	7159.87	4836.38	1603.93
2766.16	3455.1	3377.55	4126.77	5696.45	7118.15	4754.81	1616.52
2768.15	3448.16	3411.48	3599.69	5716.4	7087.96	4652.74	1670.51
2770.15	3441.89	3452.11	2969.68	5732.45	7064.91	4532.21	1778.49
2772.15	3440.7	3500.97	2279.63	5748.89	7048.17	4403.67	1940.15
2774.15	3445.67	3556.77	1612.54	5758.7	7034.47	4281.63	2127.68
2776.15	3451.39	3615.44	1206.98	5760.83	7024.39	4211.81	2251.27
2778.15	3453.98	3673.63	946.811	5762.14	7022.7	4171.85	2335.64
2780.15	3454.18	3727.83	732.904	5761.98	7034.16	4142.21	2411.2
2782.15	3452.19	3778.06	546.771	5763.7	7053.89	4118.92	2481.95
2784.14	3448.73	3824.16	392.734	5769.67	7079.2	4102.9	2544.97
2786.14	3443.29	3865.22	264.986	5781.85	7107.02	4092.47	2601.16
2788.14	3439.99	3900.74	160.363	5798.57	7140.46	4088.03	2651.64
2790.14	3442.37	3925.18	79.1565	5818.46	7177.93	4088.62	2695.2
2792.14	3454.69	3936.9	24.0164	5838.16	7216.86	4094.13	2729.13
2794.14	3478.16	3941.28	0	5860.75	7250.57	4106.15	2749.91
2796.14	3508.1	3939.6	15.6651	5886.1	7278.94	4125.68	2754.56
2798.13	3542.66	3932.11	81.4975	5912.93	7302.83	4154.41	2739.4
2800.13	3584.14	3920.34	214.082	5934.2	7316.41	4193.84	2695.57
2802.13	3631.87	3906.07	427.871	5953.55	7335.17	4250.91	2623.42
2804.13	3679.77	3892.1	735.256	5977.26	7362.91	4329.46	2522.34
2806.13	3722.41	3880.49	1143.26	6004.23	7404.93	4431.06	2394.46
2808.13	3754.6	3874.88	1648.79	6025.19	7463.56	4553.4	2245.58
2810.13	3771.43	3872.08	2200.91	6040.11	7535.71	4684.05	2099.35
2812.13	3776.11	3870.15	2664.62	6051.7	7615.03	4795.52	1997.74
2814.12	3770.16	3865.5	3038.72	6061.28	7693.2	4885.77	1933.95
2816.12	3751.96	3859.77	3340.65	6072.03	7761.31	4957.14	1895.79
2818.12	3720.81	3854.72	3574.47	6091.31	7811.72	5010.61	1875.92
2820.12	3678.36	3850.87	3755.08	6101.89	7847.03	5046.64	1865.87
2822.12	3627.27	3849.69	3899.91	6102.8	7863.6	5068.65	1858.13
2824.12	3569.31	3852.28	4017.69	6102.69	7860.23	5080.44	1850.24
2826.12	3508.83	3857.19	4115.79	6098.19	7837.16	5083.43	1839.3
2828.11	3445.76	3862.69	4198.41	6079.34	7797.62	5076.76	1824.41
2830.11	3386.04	3868.25	4271.4	6054.64	7747.56	5065.58	1806.68
2832.11	3337.49	3872.03	4335.32	6027.16	7690.45	5052.49	1785.91
2834.11	3305.27	3871.89	4394.49	6004.78	7649.92	5045.27	1770.08
2836.11	3290.22	3868.39	4449.33	5990.59	7631.74	5046.05	1760.95
2838.11	3291.24	3861.47	4501.94	5977.72	7636.32	5053.74	1757.54
2840.11	3300.62	3846.8	4554.64	5967.07	7651.8	5064.19	1758.04
2842.11	3312.36	3823.05	4609.54	5952.66	7664.75	5072.47	1758.41
2844.1	3320.51	3791.38	4666.08	5937.66	7673.31	5077.79	1759.86
2846.1	3322.36	3750.2	4720.79	5922.44	7681.68	5079.49	1765.3
2848.1	3316.48	3699.13	4772.76	5906.42	7688.31	5076.62	1774.64
2850.1	3297.93	3646.2	4820.5	5889.94	7699.6	5070.83	1790.03
2852.1	3268.24	3601.62	4865.96	5868.9	7715.43	5064.03	1808.35
2854.1	3228.87	3568.6	4910.36	5846.59	7730.98	5057.08	1827.05
2856.1	3181.61	3551.41	4950.7	5829.8	7735.61	5049.83	1841.68
2858.09	3128.97	3553.98	4985.42	5825.14	7740.57	5046.82	1855.57
2860.09	3079.26	3574.56	5016.01	5831.8	7744.3	5049.18	1866.3
2862.09	3036.23	3609.04	5041.24	5838.63	7752.15	5055.46	1874.51
2864.09	3007.94	3650.85	5059.04	5840.33	7764.78	5064.59	1878.92
2866.09	3000.42	3694.85	5067.8	5840.88	7779.68	5076.73	1878.2
2868.09	3009.11	3737.78	5068.67	5844.94	7797.22	5091.55	1874.7
2870.09	3028.83	3778.17	5061.33	5858.06	7824.18	5110.11	1873.08
2872.09	3057.83	3813.93	5047.2	5874.14	7863.19	5131.26	1874.62
2874.08	3090.86	3841.43	5024.14	5894.44	7906.02	5151.38	1878.7
2876.08	3125.5	3863.02	4990.2	5921.99	7953.7	5170.88	1886.46
2878.08	3157.83	3881.73	4947.22	5953.4	7999.59	5187.95	1895.84
2880.08	3185.44	3900.37	4897.49	5983.35	8035.05	5200.34	1903.3
2882.08	3204.1	3917.15	4843.3	6007.6	8049.57	5204.34	1905.83
2884.08	3217.3	3927.77	4788.99	6013.38	8044.78	5198.44	1902.16
2886.08	3227.93	3931.59	4734.33	6007.07	8028.63	5185.91	1895.15
2888.07	3236.65	3928.51	4684.43	5996.77	8004.6	5170.19	1886.36
2890.07	3243.58	3917.3	4637.25	5983.5	7979.2	5152.17	1878.56
2892.07	3250.29	3897.73	4599.14	5968.44	7955.84	5134.29	1872.29
2894.07	3258.5	3872.14	4572.2	5938.4	7947.36	5117.72	1869.9
2896.07	3271.47	3841.71	4556.92	5903.25	7963.24	5107.32	1875.16
2898.07	3289.69	3802.84	4547.15	5866.84	7995.71	5100.45	1886.71
2900.07	3311.51	3754.87	4545.27	5832.05	8026.45	5094.03	1898.4
2902.07	3334.14	3700.57	4550.76	5800.97	8062.82	5089.85	1913.6
2904.06	3359.08	3643.69	4559.49	5770.67	8084.61	5083.51	1923.55
2906.06	3388.67	3591.36	4574.34	5738.61	8095.89	5077.77	1927.54
2908.06	3419.45	3544.62	4595.47	5705.42	8099.3	5072.85	1927.22
2910.06	3450.45	3504.09	4626.52	5672.66	8090.4	5068.82	1920.79
2912.06	3478.12	3476.43	4661.58	5641.46	8071.73	5065.86	1909.01
2914.06	3497.69	3459.42	4697.11	5612.94	8041.55	5061.74	1892.73
2916.06	3506.8	3449.6	4736.01	5589.54	7996.93	5055.78	1871.94
2918.05	3509.68	3443.81	4772.41	5571.04	7932.88	5045.97	1844.71
2920.05	3508.72	3440.88	4809.07	5563.15	7858.03	5035.97	1814.54
2922.05	3510.35	3436.78	4843.18	5569.67	7776.35	5027.27	1782.99
2924.05	3514.42	3432.1	4872.62	5592.27	7697.85	5021.85	1754.16
2926.05	3514.74	3430.24	4906.16	5625.58	7631.94	5021.73	1731.69
2928.05	3510.72	3432.27	4936.8	5662.07	7598.83	5028.14	1722.5
2930.05	3504.91	3436.98	4958.74	5694.61	7581.31	5035.31	1718.97
2932.05	3497.95	3442.93	4974.55	5723.27	7571.62	5042.06	1718.19
2934.04	3491.14	3445.64	4978.71	5747.69	7560.86	5044.81	1717.57
2936.04	3482.83	3447.12	4967.17	5771.93	7544.36	5042.68	1715.72
2938.04	3472.76	3446.86	4948.01	5794.03	7531.11	5038.55	1715.88
2940.04	3462	3444.48	4923.8	5808.78	7518.04	5031.42	1716.14
2942.04	3454.2	3442.47	4904.79	5824.43	7495.4	5024.26	1712.32
2944.04	3448.86	3444.9	4890.77	5841.75	7465.46	5018.35	1704.52
2946.04	3444.16	3451.56	4879.11	5851.92	7431.78	5011.71	1693.48
2948.03	3439.86	3461.43	4870.42	5853.34	7392.07	5003.42	1678.41
2950.03	3436.7	3474.59	4863.71	5850.64	7341.44	4993.42	1657.94
2952.03	3434.39	3487.5	4861.18	5843.7	7280.68	4981.49	1633.22
2954.03	3434.25	3499.27	4865.77	5830.41	7213.83	4968.71	1605.27
2956.03	3437.49	3509.82	4875.04	5811.92	7150.18	4956.89	1577.25
2958.03	3446.19	3519.05	4891.32	5790.11	7096.73	4948.68	1551.35
2960.03	3463.5	3525.48	4915.05	5766.57	7049.85	4944.09	1526.12
2962.03	3493.24	3527.43	4945.23	5743.04	6996.17	4941.02	1496.76
2964.02	3530.2	3528.07	4978.86	5720.14	6935.52	4938.56	1464.01
2966.02	3570.45	3530.28	5011.72	5691.07	6872.98	4935.3	1429.03
2968.02	3617.43	3535.13	5042.75	5659.35	6820.69	4935.07	1395.32
2970.02	3666.35	3544.69	5074.56	5628.91	6797.2	4942.34	1370.31
2972.02	3710.84	3561.26	5102.35	5596.29	6789.69	4952.09	1349.95
2974.02	3748.11	3583.38	5119.12	5556.5	6797.81	4960.98	1334.39
2976.02	3777.01	3609.52	5123.08	5515.13	6818.47	4968.64	1323.97
2978.01	3798.96	3639.41	5118.92	5479.96	6848.76	4977.2	1318.48
2980.01	3816.09	3671.73	5106.61	5461.22	6884.89	4988.11	1317.4
2982.01	3826.73	3705.21	5083.35	5452.3	6926.4	4998.8	1320.56
2984.01	3828.09	3736.47	5053.68	5450.76	6968.49	5007.5	1327.65
2986.01	3819.66	3764.32	5023.11	5459.4	6998.34	5012.97	1334.56
2988.01	3803.16	3788.31	4995.06	5474.22	7016.62	5015.48	1340.81
2990.01	3780	3806.56	4964.63	5492.2	7033.55	5015.39	1350.03
2992.01	3757.64	3817.49	4932.46	5511.51	7052.09	5014.24	1361.8
2994	3734.9	3823.79	4902.25	5542.91	7074.49	5015.67	1377.54
2996	3709.84	3825.67	4874.2	5584.05	7093.28	5017.41	1394.71
2998	3679.84	3820.28	4849.08	5629.03	7098.72	5015.39	1410.36
3000	3640.74	3804.96	4828.78	5676.99	7092.26	5008.75	1426.58
3002	3592.82	3781.98	4814.1	5726.07	7084.97	4999.99	1446.77
3004	3537.8	3752.13	4802.26	5773.29	7075.97	4988.29	1469.8
3006	3479.09	3715.63	4791.54	5819.27	7058.45	4972.8	1492.56
3007.99	3420.52	3676.06	4782.01	5864.65	7034.4	4955.53	1514.23
3009.99	3365.33	3636.17	4774.07	5901.27	7009	4937.17	1533.94
3011.99	3312.14	3597.16	4767.41	5936.27	6988.95	4920.39	1554.97
3013.99	3265.37	3562.32	4758.73	5976.72	6980.56	4908.74	1578.69
3015.99	3225.54	3534.74	4751.94	6013.83	6994.56	4904.12	1606.04
3017.99	3192.69	3512.97	4751.06	6045.74	7015.68	4903.63	1631.7
3019.99	3165.73	3496.78	4757.31	6070.35	7050.04	4908.04	1657.49
3021.99	3144.21	3484.94	4764.17	6097.77	7092.39	4916.7	1684
3023.98	3127.72	3478.64	4771.45	6124.4	7139.24	4928.29	1709.32
3025.98	3121.24	3474.84	4771.23	6154.3	7189.99	4942.32	1733.5
3027.98	3124.13	3474.14	4769.89	6181.36	7246.84	4959.28	1756.11
3029.98	3133.22	3472.71	4769.76	6206.89	7305.43	4977.6	1777.61
3031.98	3144.97	3471	4772.76	6230.51	7365.02	4996.85	1798.47
3033.98	3158.63	3470.27	4781.56	6238.35	7417.29	5013.22	1813.45
3035.98	3170.14	3471.62	4797.18	6232.57	7458.77	5026.05	1822.56
3037.97	3176.78	3474.22	4817.91	6204.89	7495.39	5033.84	1827.45
3039.97	3180.63	3472.67	4838.73	6163.68	7522.48	5035.64	1828.9
3041.97	3182.83	3464.13	4852.73	6110.25	7540.45	5030.08	1827.89
3043.97	3183.86	3453.08	4859.56	6055.21	7554.87	5021.32	1826.86
3045.97	3185.81	3447.83	4859.07	6007.81	7572.7	5014.65	1827.14
3047.97	3188.33	3447.19	4851.95	5968.59	7599.28	5011.07	1830.92
3049.97	3194	3447.2	4841.71	5935.29	7634.42	5010.52	1837.95
3051.97	3204.63	3448.37	4829.96	5902.68	7662.42	5009.61	1841.38
3053.96	3222.38	3452.87	4815.52	5873.61	7697.1	5012.29	1845.56
3055.96	3247.07	3464.48	4800.01	5845.38	7736.26	5018.64	1848.69
3057.96	3277.09	3481.12	4782.91	5823.83	7776.1	5028.21	1850.95
3059.96	3309.39	3501.07	4761.87	5809.57	7796.85	5035.75	1846.15
3061.96	3343.68	3519.12	4739.26	5797.02	7808.71	5041.56	1838.46
3063.96	3380.74	3534.27	4714.25	5789.02	7819.11	5047.48	1831.03
3065.96	3419.13	3547.44	4688.83	5778.85	7830.01	5052.85	1823.97
3067.95	3456.37	3559.75	4664.82	5764.79	7831.26	5055.4	1813.5
3069.95	3487.28	3571.95	4646.55	5738.51	7834.28	5055.71	1803.86
3071.95	3512.05	3584.64	4636.91	5693.76	7838.9	5053.25	1794.13
3073.95	3532.97	3598.4	4633.68	5638.33	7846.57	5049.99	1785.27
3075.95	3549.61	3611.57	4635.72	5573.14	7845.77	5043.16	1773.53
3077.95	3559.7	3621.89	4641.63	5503.38	7843	5033.92	1762.98
3079.95	3563.33	3630.32	4644.68	5437.25	7843.33	5023.78	1756.36
3081.95	3560.38	3635.23	4645.68	5377.82	7845.6	5012.94	1753.57
3083.94	3552.6	3633.59	4650.49	5328.15	7840.04	5000.97	1750.55
3085.94	3540.77	3627.9	4662.42	5303.22	7831.11	4993.08	1748.78
3087.94	3527.48	3620.36	4682.87	5309.4	7805.04	4989.03	1741.81
3089.94	3514.49	3610.86	4709.19	5339.18	7764.55	4987.65	1730.47
3091.94	3501.37	3601.25	4742.02	5386.91	7716.19	4989.55	1717.25
3093.94	3490.48	3590.89	4781.72	5444.54	7666.05	4994.73	1704.2
3095.94	3485.71	3577.54	4820.63	5514.11	7619.36	5003.47	1693.66
3097.93	3487.49	3557.85	4858.9	5587.74	7584	5015.2	1688.84
3099.93	3493.42	3535.95	4895.28	5658.2	7575.08	5031.59	1694.36
3101.93	3502.54	3517.88	4931.39	5722.77	7584.45	5051.81	1705.29
3103.93	3512.15	3508.33	4965.77	5772.33	7609.49	5073.61	1718.92
3105.93	3522.09	3511.59	4997.25	5804	7628.67	5092.72	1725.76
3107.93	3532.79	3527.74	5025.58	5811.44	7641.37	5107.78	1724.68
3109.93	3541.48	3554.7	5049.87	5791.95	7652.23	5118.05	1718.32
3111.93	3545.84	3584.77	5074.17	5751.04	7665.38	5124.24	1711.29
3113.92	3543.9	3614.98	5096.85	5697.39	7679.37	5126.5	1705.38
3115.92	3537.82	3645.98	5118.07	5635.34	7689.49	5125.34	1698.8
3117.92	3525.12	3676.41	5132.38	5581.27	7680.56	5119.15	1687.97
3119.92	3502.11	3704.41	5137.71	5536.99	7652.82	5106.81	1674.06
3121.92	3465.15	3729.83	5130.82	5500.1	7616.61	5088.5	1661.61
3123.92	3408.78	3751.12	5119.95	5463.09	7576.01	5063.79	1653.48
3125.92	3325.52	3766.89	5106.21	5428.78	7537.81	5033.05	1654.89
3127.91	3215.56	3776.46	5091.61	5397.79	7510.04	4998.29	1669.45
3129.91	3064.12	3782.63	5079.86	5372.38	7485.53	4956.9	1698.77
3131.91	2857.67	3785.99	5073.04	5352.01	7462.91	4906.32	1747.48
3133.91	2593.1	3785.93	5072.6	5333.87	7438.61	4844.82	1817.3
3135.91	2268.59	3780.58	5082.68	5310.08	7417.79	4771.94	1912.87
3137.91	1893.25	3769.16	5101.65	5290.6	7401.66	4691.27	2034.27
3139.91	1509.99	3749.06	5123.85	5279.96	7389.75	4610.52	2167.44
3141.91	1149.19	3723.75	5142.15	5282.78	7381.99	4535.97	2299.73
3143.9	820.972	3696.41	5157.21	5294.68	7379.1	4469.68	2425.34
3145.9	619.103	3669.6	5162.71	5309.53	7365.83	4425.35	2501.53
3147.9	478.38	3645.65	5143.61	5334.89	7333.86	4387.28	2548.62
3149.9	359.644	3625.23	5105.65	5362.86	7286.31	4347.94	2582.01
3151.9	258.698	3611.42	5054.76	5393.98	7229.34	4309.64	2605.44
3153.9	173.575	3606.08	4994.61	5429.64	7161.35	4273.05	2619.69
3155.9	105.642	3609.66	4934.83	5458.98	7083.48	4238.52	2624.13
3157.89	49.6719	3620.12	4882.27	5484.57	7000.82	4207.49	2623.04
3159.89	11.1687	3636.03	4838.63	5512.33	6917.54	4183.14	2616.2
3161.89	0	3653.95	4802.38	5544.2	6843.1	4168.73	2602.35
3163.89	17.0023	3671.23	4770.45	5583.16	6794.1	4167.19	2585.52
3165.89	74.8609	3687.82	4747.88	5628.81	6768.25	4181.52	2560.03
3167.89	185.376	3703.61	4735.67	5671.95	6759.63	4211.25	2518.35
3169.89	361.395	3714.53	4730.25	5709.5	6765.03	4256.14	2454.28
3171.89	615.3	3718.61	4730.52	5742.22	6775.21	4316.37	2361.45
3173.88	951.501	3714.1	4732.5	5767.43	6787.2	4390.55	2238.37
3175.88	1366.34	3703.2	4732.23	5792.52	6798.83	4478.62	2089.35
3177.88	1842.97	3689.31	4729.68	5821.06	6816.17	4579.84	1926.64
3179.88	2249.49	3673.71	4728.22	5856.62	6835.95	4668.8	1799.6
3181.88	2492.19	3657.33	4729.81	5894.14	6862.72	4727.24	1736.52
3183.88	2688.28	3643.15	4729.74	5933.05	6888.4	4776.52	1691.53
3185.88	2845.04	3633.13	4726.88	5965.89	6917.33	4817.66	1660.54
3187.87	2971.68	3630.28	4723.19	5996.79	6952.5	4854.89	1640.69
3189.87	3075.22	3636.8	4721.5	6033.95	6987.41	4890.98	1627.89
3191.87	3154.84	3654.33	4718.14	6074.52	7011.55	4922.68	1617.55
3193.87	3214.62	3681.94	4714.23	6125.29	7038.72	4954.96	1613.93
3195.87	3253.28	3716.52	4707.85	6177.53	7073.79	4985.79	1617.86
3197.87	3269.93	3753.42	4696.44	6224.87	7112.39	5011.41	1627.97
3199.87	3268.27	3787.17	4680.45	6260.19	7151.95	5029.6	1642.14
3201.87	3254.62	3817.21	4665.44	6290.8	7194.24	5044.46	1660.44
3203.86	3234.23	3845.15	4648.89	6307.09	7240.13	5055.1	1679.76
3205.86	3210.24	3869.1	4632.65	6307.02	7291.8	5062.16	1699.89
3207.86	3181.44	3881.3	4619.35	6294.26	7344.48	5064.17	1721.53
3209.86	3150.65	3884.16	4613.94	6265.2	7391.53	5061.1	1740.38
3211.86	3126.92	3880.06	4616.78	6220.4	7433.64	5055.56	1754
3213.86	3114.76	3868.79	4631.07	6166.1	7476.31	5051.41	1764.12
3215.86	3116.87	3854.47	4656.88	6110.91	7521.67	5052.16	1771.69
3217.85	3133.81	3835.19	4694.29	6056.39	7574.78	5058.89	1779.12
3219.85	3161.09	3813.04	4746.75	6008.11	7639.27	5073.65	1789.52
3221.85	3191.29	3790.15	4815.04	5961.55	7710.61	5093.73	1802.6
3223.85	3224.12	3770.77	4897.97	5908.03	7786.75	5117.53	1816.36
3225.85	3252.44	3757.51	4984.6	5849.02	7862.76	5141.27	1831.29
3227.85	3276.85	3751.51	5073.36	5787.9	7930.29	5163.98	1844.33
3229.85	3301.53	3753.75	5156.65	5729.24	7976.29	5183.49	1849.61
3231.85	3328.09	3762.36	5231.88	5680.48	8000.08	5200.58	1846.83
3233.84	3356.59	3775.38	5299.33	5640.26	7999.97	5214.31	1835.09
3235.84	3389.46	3790.89	5350.77	5607.26	7980.69	5223.81	1815.33
3237.84	3425.13	3806.87	5383.18	5584.64	7943.38	5228.64	1788.47
3239.84	3461.98	3820.32	5401.16	5579.1	7894.54	5231.42	1758.12
3241.84	3496.41	3832.46	5401.3	5577.61	7839.24	5229.4	1726.03
3243.84	3526.57	3838.87	5385.65	5578.27	7779.64	5221.8	1694.31
3245.84	3547.1	3836.35	5356.37	5575.4	7721.42	5207.33	1666.91
3247.83	3556.07	3825.13	5316.56	5564.24	7681.14	5188.63	1650.34
3249.83	3551.18	3807.35	5270.31	5555.32	7662.48	5169.33	1646.84
3251.83	3531.78	3789.81	5216.3	5552.93	7661.75	5150.51	1654.11
3253.83	3499.86	3774.99	5162.14	5562.98	7668.35	5133.66	1667.71
3255.83	3458.2	3765.47	5106.87	5583.17	7678.09	5118.36	1684.85
3257.83	3413.31	3762.66	5046.08	5614.14	7681.51	5103.54	1700.35
3259.83	3367.84	3764.29	4982.63	5653.45	7676.15	5088.87	1713.22
3261.83	3325.2	3772.06	4921.4	5691.59	7664.93	5075.04	1722.71
3263.82	3288.31	3781.14	4867.17	5721.9	7646.84	5061.07	1727.82
3265.82	3254.43	3789.41	4822.64	5744.95	7628.38	5047.96	1731.75
3267.82	3221.4	3796.8	4786.26	5766.95	7612.64	5036.81	1736.67
3269.82	3191.17	3799.39	4756.84	5784.86	7598.53	5026.16	1741.94
3271.82	3163.52	3798.12	4736.84	5802.7	7591.4	5018.52	1749.6
3273.82	3139.32	3791.26	4723.69	5822.34	7592.97	5013.92	1760.56
3275.82	3124.23	3781.71	4713.54	5839.13	7606.73	5013.07	1773.63
3277.81	3122.18	3765.68	4708.3	5857.21	7634.99	5017.67	1789.64
3279.81	3137.6	3744.65	4705.88	5864.98	7677.4	5026.1	1805.84
3281.81	3173.6	3718.81	4706.58	5859.78	7729.76	5037.71	1819.82
3283.81	3230.51	3694	4710.24	5848.86	7788.41	5054.4	1830.42
3285.81	3302.4	3669.4	4714.52	5826.01	7844.38	5071.34	1835.84
3287.81	3381.42	3651.32	4717.57	5794.98	7900.16	5089.09	1838.59
3289.81	3466.05	3639.37	4717.7	5759.68	7961.44	5108.85	1842.01
3291.81	3552.58	3632.05	4715.8	5723.87	8013.93	5127.65	1842.11
3293.8	3639.81	3626.47	4714.01	5693.92	8067.42	5148.33	1843.84
3295.8	3724.12	3621.37	4711.05	5667.74	8121.35	5169.13	1847.82
3297.8	3803.01	3616.34	4705.7	5638	8181.17	5188.84	1856.24
3299.8	3876.95	3612.87	4699.9	5608.77	8230.49	5205.8	1862.15
3301.8	3945.11	3616.66	4692.28	5581.86	8268.17	5220.82	1863.92
3303.8	4003.82	3628.53	4680.47	5560.23	8288.41	5232.29	1859.64
3305.8	4048.47	3645.52	4665.22	5542.78	8300.25	5240.45	1854
3307.79	4081.82	3665.53	4644.32	5529.2	8298.53	5243.88	1844.81
3309.79	4106.64	3686.79	4618.69	5521.91	8276.07	5242.02	1828.95
3311.79	4121.55	3708.78	4592.2	5522.79	8235.15	5236.09	1807.35
3313.79	4125.95	3726.8	4567.63	5521.02	8183.7	5225.02	1783.69
3315.79	4115.49	3739.99	4546.72	5512.29	8123.87	5207.67	1759.32
3317.79	4089.76	3748.07	4529.42	5499.21	8060.58	5185.41	1736.51
3319.79	4049.4	3750.14	4513.19	5480.68	7994.47	5157.58	1715.85
3321.79	3996.33	3745.5	4499.8	5455.82	7935.93	5126.68	1701.36
3323.78	3931.5	3736.95	4489.89	5433.6	7895.45	5097.48	1697.15
3325.78	3861.52	3728.51	4485.93	5416.1	7856.84	5069.78	1694.65
3327.78	3788	3717.5	4487.5	5413.09	7811.54	5043.52	1691.33
3329.78	3712.37	3707.47	4496.73	5416.78	7762.73	5019.22	1687.19
3331.78	3636.83	3697.28	4516.74	5417.95	7719.87	4997.73	1685.32
3333.78	3562.26	3684.27	4543.49	5419.66	7689.35	4979.8	1689.18
3335.78	3492.85	3671.48	4569.14	5421.97	7677.92	4966.67	1700.43
3337.77	3434.26	3660.65	4597.8	5431.22	7689.78	4962.74	1719.09
3339.77	3385.72	3652.31	4628.92	5450.15	7714.79	4966.38	1741.19
3341.77	3347.59	3647.3	4664.18	5477.67	7744.72	4976.29	1762.94
3343.77	3321.2	3650.26	4702.93	5508.94	7780.24	4992.71	1783.04
3345.77	3307.88	3664.11	4741.39	5542.31	7829.46	5017.03	1803.69
3347.77	3302.49	3687.86	4773.14	5577.85	7873.89	5043.05	1819.24
3349.77	3298.28	3717.31	4797.49	5608.62	7908.32	5066	1829.56
3351.77	3299.97	3747.83	4812.83	5631.89	7935.75	5085.65	1835.37
3353.76	3310.45	3776.74	4816.36	5653.95	7959.79	5103.46	1838.42
3355.76	3327.85	3797.7	4814.07	5672.94	7970.78	5116.67	1836.2
3357.76	3347.4	3809.63	4807.74	5689.14	7966.34	5124.05	1829.09
3359.76	3362.48	3815.96	4801.33	5702.55	7955.91	5127.64	1821.57
3361.76	3372.84	3812.95	4795.91	5707.42	7937.02	5125.23	1812.91
3363.76	3380.52	3801.46	4794.56	5697.48	7905.71	5115.95	1800.27
3365.76	3387.53	3792.39	4793	5677.67	7860.15	5102.15	1781.07
3367.75	3396.74	3789.26	4794.06	5648.95	7807.65	5087.33	1756.75
3369.75	3410.19	3795.16	4798.5	5616.74	7750.37	5074.19	1727.5
3371.75	3426.68	3808.5	4800.69	5584.15	7699.27	5063.86	1698.65
3373.75	3443.89	3825.4	4801.65	5555.5	7662.58	5057.81	1674.94
3375.75	3458.48	3841.4	4798.52	5531.69	7638.08	5053.64	1657.33
3377.75	3470.43	3854.28	4790.34	5511.74	7620.79	5049.52	1644.26
3379.75	3483.12	3865.4	4775.99	5492.89	7609.35	5045.35	1634
3381.75	3499.57	3876.87	4754.34	5477.64	7603.69	5042.42	1625.68
3383.74	3524.59	3887.34	4727.72	5466.58	7599.58	5041.16	1616.79
3385.74	3557.68	3897.67	4697.34	5457.63	7602.88	5042.64	1609.53
3387.74	3595.34	3907.17	4667.51	5445.34	7605.39	5044.15	1601.13
3389.74	3634.93	3916.58	4641.55	5436.96	7610.21	5048.05	1593.6
3391.74	3672.51	3926.04	4622.07	5432.46	7606.83	5051.98	1583.31
3393.74	3704.29	3935.82	4612.28	5430.06	7597.64	5056.02	1571.52
3395.74	3730.17	3945.11	4611.22	5425.14	7591.23	5060.57	1561.51
3397.73	3753.09	3954.57	4617.24	5418	7584.92	5065.56	1551.55
3399.73	3774	3966.63	4630.62	5410.08	7575.7	5071.41	1539.83
3401.73	3794.06	3979.85	4652.61	5401.64	7569.95	5079.62	1528.88
3403.73	3811.64	3991.49	4686.19	5392.99	7568.26	5090.11	1519.67
3405.73	3821.7	4002.08	4730.05	5380.38	7574.95	5101.83	1514.95
3407.73	3821.73	4009.7	4781.03	5366.78	7588.05	5113.46	1515.35
3409.73	3810.54	4012.45	4837.26	5351.37	7607.02	5123.73	1521.52
3411.73	3791.22	4014.47	4892.25	5332.52	7625.6	5131.21	1529.89
3413.72	3767.47	4019.88	4948.47	5316.43	7625.13	5135.48	1531.51
3415.72	3740.99	4022.83	5001.09	5304.66	7609.69	5135.85	1528.97
3417.72	3713.01	4031.59	5053.05	5298.02	7582.12	5135.56	1521.62
3419.72	3685.63	4044.28	5105.01	5293.34	7544.78	5134.61	1510.24
3421.72	3658.76	4060.26	5154.39	5295.75	7500.77	5133.99	1496.45
3423.72	3633.94	4080.91	5200.15	5309.16	7452.43	5135.32	1480.65
3425.72	3609.17	4106.2	5241.28	5334.31	7402.58	5138.71	1464.54
3427.71	3586.76	4132.87	5275.74	5361.57	7358.51	5143.09	1450.53
3429.71	3568.08	4161.1	5302.97	5387.46	7333.86	5150.7	1443.04
3431.71	3552.02	4188.33	5321.5	5413.26	7322.9	5159.6	1440.32
3433.71	3536.78	4210.86	5328.39	5440.45	7306.14	5164.52	1436.02
3435.71	3524.77	4226.09	5324.29	5474.39	7275.8	5165.07	1427.28
3437.71	3520.14	4231.43	5306.33	5516.93	7246.26	5164.22	1418.85
3439.71	3521.06	4225.02	5276.24	5570.68	7220.78	5162.75	1413.26
3441.71	3526.97	4203.13	5237.16	5629.59	7206.44	5160.66	1413.93
3443.7	3537.87	4164.91	5190.45	5691.18	7200.67	5157.02	1420.29
3445.7	3551.89	4117.59	5137.17	5750.67	7205.79	5152.62	1432.4
3447.7	3567.71	4064.8	5079.3	5810.45	7227.79	5150.01	1452.56
3449.7	3585.02	4012.9	5022	5866.6	7269.71	5151.25	1480.31
3451.7	3605.02	3966.92	4966.77	5921.12	7325.25	5157.02	1512.14
3453.7	3628.01	3930.23	4914.65	5972.91	7401.78	5169.52	1549.63
3455.7	3654.33	3898.27	4863.82	6015.86	7497.89	5186.03	1592.29
3457.69	3679.63	3871.12	4816.67	6042.96	7609.03	5203.88	1638.47
3459.69	3701.45	3847.47	4770.97	6051.85	7727.91	5219.93	1686.2
3461.69	3717.54	3826.55	4728.58	6049.64	7840.31	5232.52	1731.63
3463.69	3725.13	3812.44	4687.93	6043.96	7934.96	5240.89	1771.07
3465.69	3722.78	3805.78	4653.13	6036.03	8008	5245.14	1802.69
3467.69	3710.37	3807.62	4625.65	6027.68	8057.39	5245.74	1825.3
3469.69	3687.67	3817.36	4605.93	6021.96	8086.9	5243.97	1840.65
3471.69	3655.76	3831.78	4595.89	6025.98	8101	5242.08	1851.41
3473.68	3618.48	3848.82	4593.67	6044.32	8109.33	5242.93	1861.61
3475.68	3581.22	3866.76	4598.76	6065.41	8116.98	5245.83	1871.27
3477.68	3548.37	3884.62	4609.15	6090.98	8128.89	5252.4	1881.87
3479.68	3525.29	3904.75	4623.32	6112.81	8146.48	5262.53	1891.45
3481.68	3510.15	3925.96	4638.52	6127.44	8153.08	5271.03	1894.05
3483.68	3500.09	3941.09	4654.73	6142.82	8153.77	5278.5	1894.38
3485.68	3493.71	3947.9	4667.87	6157.12	8148.62	5283.04	1893.3
3487.67	3492.66	3946.62	4686.8	6160.58	8144.71	5286.27	1891.17
3489.67	3500.2	3938.01	4712.78	6160.79	8148.03	5291.96	1890.18
3491.67	3505.57	3926.41	4743.96	6155.96	8164.97	5299.37	1894.51
3493.67	3505.61	3921.74	4774.29	6141.68	8183.57	5305.38	1898.62
3495.67	3501.76	3922.71	4799.79	6113.57	8202.45	5308.06	1901.75
3497.67	3491.62	3930.71	4819.14	6080.01	8206.77	5305.65	1899.6
3499.67	3473.92	3946.41	4835.5	6045.89	8192.81	5298.91	1891.25
3501.67	3446.87	3969.05	4847.88	6017.96	8161.11	5288.57	1878.21
3503.66	3411.2	3995.5	4855.9	5997.53	8108.81	5273.79	1860.04
3505.66	3368.85	4024.31	4860.63	5983.09	8035.39	5254.45	1836.33
3507.66	3325.47	4053.07	4863.81	5973.85	7948.29	5232.9	1808.93
3509.66	3288.08	4080.56	4863.4	5967.47	7850.61	5210.02	1777.37
3511.66	3260.79	4102.45	4861.83	5959.07	7752.41	5187.31	1744.25
3513.66	3245.8	4116.83	4859.02	5948.56	7667.42	5167.53	1714.03
3515.66	3244.86	4123.26	4851.01	5936.58	7591.83	5149.5	1684.82
3517.65	3261.75	4119.63	4837.65	5927.6	7519.8	5133.29	1654.08
3519.65	3286.93	4106.93	4822.38	5917.45	7449.7	5116.68	1623.14
3521.65	3309.82	4082.38	4806.34	5908.72	7383.69	5098.19	1596.54
3523.65	3326.1	4050.58	4789.65	5899.07	7325.51	5078.18	1575.86
3525.65	3338.63	4020.28	4772.69	5889.34	7286.84	5061.56	1563.11
3527.65	3345.36	3988.47	4754.01	5884.34	7273.7	5049.18	1562.15
3529.65	3345.76	3953.85	4735.37	5887.81	7275.42	5039.64	1569.94
3531.65	3338.79	3915.77	4714.55	5899.9	7287.63	5031.33	1585.47
3533.64	3323.09	3871.72	4691.31	5918.8	7301.52	5021.29	1606.18
3535.64	3298.85	3822.37	4666.09	5936.42	7318.05	5008.36	1631.11
3537.64	3269.98	3773.97	4642.1	5947.27	7329.63	4992.59	1654.42
3539.64	3238.06	3737.48	4620.39	5959.88	7333.1	4977.78	1673.67
3541.64	3203.1	3712.05	4605.18	5976.19	7328.47	4965	1689.09
3543.64	3164	3699.26	4596.6	5986.9	7314.49	4952.25	1698.9
3545.64	3120.71	3695.72	4597.02	5990.42	7298.53	4940.48	1706
3547.63	3077.9	3703.35	4601.57	5994.72	7281.69	4931.84	1710.77
3549.63	3036.99	3720.29	4606.45	6000.47	7263.5	4925.54	1713.37
3551.63	3002.19	3740.27	4608.94	6009.05	7248.38	4921.77	1715.65
3553.63	2975.94	3758.52	4613	6019.46	7233.83	4920.15	1716.48
3555.63	2961.22	3771.64	4614.93	6031.03	7222.42	4920.25	1716.4
3557.63	2958.79	3779.71	4615.36	6040.46	7223.56	4923.58	1717.64
3559.63	2966.67	3786.95	4615.86	6047.54	7238.49	4931.1	1720.31
3561.63	2984.03	3791.43	4617.84	6048.12	7264.34	4941.15	1723.32
3563.62	3013.53	3788.1	4619.17	6043.2	7290.96	4950.99	1723.7
3565.62	3054.02	3776.03	4621.94	6036.51	7310.84	4959.87	1720.04
3567.62	3101.63	3756.07	4629.06	6025.79	7336.84	4969.88	1717.36
3569.62	3151.95	3730.02	4641.22	6008.3	7377.45	4981.79	1719.31
3571.62	3202.98	3700.12	4654.55	5988.53	7424.89	4994.21	1724.49
3573.62	3253.87	3668.71	4671.06	5968.27	7474.43	5007.27	1731.3
3575.62	3303.2	3641.84	4685.59	5948.69	7529.14	5021.69	1740.46
3577.61	3348.55	3616.97	4701.73	5928.4	7581.5	5035.43	1749.92
3579.61	3388.69	3590.94	4716.09	5904.31	7625.49	5045.1	1758.07
3581.61	3420.32	3566.38	4725.68	5879.12	7659.11	5050.12	1764.73
3583.61	3442.04	3544.57	4728.85	5857.55	7686.97	5052	1772.06
3585.61	3451.62	3525.61	4726.45	5843.86	7705.01	5050.51	1779.22
3587.61	3445.32	3506.56	4723.54	5839.25	7710.41	5045.02	1786.36
3589.61	3422.36	3488.17	4720.88	5838.67	7713.33	5036.68	1796.61
3591.61	3384.28	3467.09	4719.73	5844.46	7714.67	5026.05	1810.94
3593.6	3332.36	3442.33	4723.18	5857.78	7720.67	5015.26	1831.71
3595.6	3272.55	3416.57	4732.68	5874.47	7720.59	5003.37	1852.64
3597.6	3213.77	3392.05	4743.57	5887.36	7710.01	4989.35	1869.01
3599.6	3159.2	3368.08	4753.97	5898.42	7688.75	4973.69	1880.51
3601.6	3115.91	3343.72	4757.71	5903.36	7661.16	4956.37	1886.8
3603.6	3090.51	3317.44	4760.31	5907.31	7630.83	4941.28	1888.24
3605.6	3083.48	3287.64	4763.67	5904.95	7597.11	4927.37	1884.05
3607.59	3091.98	3257.06	4766.36	5899.43	7566.56	4916.28	1877.11
3609.59	3110.89	3229.73	4766.41	5893.88	7540.35	4908.25	1868.65
3611.59	3136.5	3205.92	4763.03	5895.61	7516.61	4903.53	1859.87
3613.59	3160.9	3186.2	4756.36	5901.58	7494.23	4899.85	1851.71
3615.59	3182.47	3173.14	4746.44	5907.28	7474.11	4896.69	1843.64
3617.59	3202.09	3166.64	4734.68	5913.54	7459.05	4895.2	1836.48
3619.59	3222.84	3167.31	4723.23	5913.32	7451.66	4895.67	1829.21
3621.59	3246.95	3173	4713.9	5910.35	7455.59	4899.96	1823.57
3623.58	3276.84	3186.63	4710.85	5900.66	7462.14	4907.42	1814.64
3625.58	3312.24	3206.75	4713.38	5888.24	7460.82	4916.29	1799.72
3627.58	3351.74	3231.16	4720.36	5881.2	7453.02	4927.5	1781.24
3629.58	3396.81	3258.54	4731.02	5884.34	7442.97	4942.74	1761.32
3631.58	3448.2	3288.88	4744.26	5898.16	7429.93	4961.89	1739.64
3633.58	3499.15	3322.01	4763.48	5908.34	7421.37	4982.87	1718.34
3635.58	3546.62	3354.08	4789.42	5921.48	7417.02	5005.72	1699.76
3637.57	3589.29	3382.09	4821.07	5931.65	7416	5028.02	1683.81
3639.57	3623.15	3408.31	4855.84	5945.87	7403.72	5047.38	1666.68
3641.57	3649.23	3431.39	4892.46	5960.41	7387.66	5064.23	1650.71
3643.57	3668.49	3448.28	4927.78	5973.26	7369.48	5077.46	1636.89
3645.57	3680.61	3457.01	4955.76	5987.79	7357.9	5087.81	1629.45
3647.57	3685.67	3457.6	4975.98	6000.36	7354.06	5094.73	1628.23
3649.57	3680.97	3450.26	4984.3	6007.97	7363.01	5097.3	1635.11
3651.57	3667.28	3434.11	4979.68	6005.84	7366.98	5090.78	1643.29
3653.56	3646.75	3410.04	4967.51	5989.89	7366.28	5076.09	1651.55
3655.56	3619.91	3380.69	4948.94	5962.55	7375.75	5057.57	1664.6
3657.56	3588.76	3343.88	4922.1	5925.96	7397.76	5035.69	1683.8
3659.56	3555.1	3301.28	4886.09	5885.2	7419.42	5009.42	1704.63
3661.56	3520.65	3254.92	4843.44	5843.46	7447.11	4981.92	1728.9
3663.56	3489.84	3209.86	4795.61	5809.74	7475.15	4956.04	1753.52
3665.56	3462.89	3169.69	4747.22	5781.93	7495.62	4931.47	1774.31
3667.55	3440.11	3138.39	4698.05	5756.38	7507.67	4908.12	1789.44
3669.55	3423.1	3119.05	4650.39	5727.8	7517.63	4887.6	1799.43
3671.55	3411.25	3110.77	4602.46	5693.44	7527.94	4869.17	1805.35
3673.55	3407.13	3107.35	4557.83	5661.25	7527.01	4852.11	1804.75
3675.55	3410.34	3108.37	4525.08	5634.07	7517.82	4839.13	1798.81
3677.55	3415.72	3112.74	4509.28	5612.77	7513.93	4832.89	1793.61
3679.55	3420.51	3119.15	4510.05	5599.03	7518.48	4833.44	1791.32
3681.55	3424.1	3126.77	4520.81	5595.88	7529.49	4839.41	1792.1
3683.54	3422.32	3136.61	4537.49	5603.29	7542.87	4848.52	1795.18
3685.54	3415.45	3148.49	4561.6	5620.3	7554.9	4860.15	1799
3687.54	3404.68	3160.14	4589.14	5646.95	7567.54	4873.69	1804.85
3689.54	3391.52	3172.39	4617.29	5683.05	7580.32	4888.91	1812.23
3691.54	3378.71	3186.5	4644.65	5720.6	7599.11	4905.91	1821.68
3693.54	3367.29	3201.24	4676.37	5754.61	7624.03	4924.71	1832.53
3695.54	3358.86	3214.36	4707.98	5777.31	7651.11	4941.92	1842.74
3697.53	3358.76	3227.75	4737.91	5789.09	7684.56	4959.61	1852.34
3699.53	3365.09	3238.05	4765.34	5802.88	7713.91	4977.05	1860.09
3701.53	3377.13	3246.24	4789.84	5814.75	7718.32	4989.26	1857.82
3703.53	3393.16	3249.1	4811.98	5820.64	7699.38	4994.85	1846.81
3705.53	3408.72	3244.47	4831.23	5827.53	7664.42	4995.27	1832.1
3707.53	3419.39	3231.23	4845.62	5837.89	7616.81	4990.19	1816.59
3709.53	3424.49	3211.94	4851.43	5852.07	7562.58	4980.5	1802.25
3711.53	3422.19	3191.28	4849.83	5861.1	7512.25	4967.33	1791.02
3713.52	3411.07	3173.88	4840.93	5867.18	7476.97	4954.01	1786.16
3715.52	3393.21	3162.27	4824.26	5873.1	7443.3	4939.23	1782.1
3717.52	3371.2	3163.61	4801.76	5883.08	7417.63	4927.45	1779.26
3719.52	3346.77	3175.68	4775.05	5893.1	7406.51	4919.42	1779.63
3721.52	3322.81	3195.22	4747.09	5901.25	7416.97	4916.67	1785.59
3723.52	3302.41	3218.01	4722.26	5908.83	7438.39	4917.98	1793.91
3725.52	3284.25	3240.62	4700.78	5911.14	7463.46	4920.05	1802.47
3727.51	3268.22	3259.7	4683.94	5905.77	7495.21	4922.57	1812.74
3729.51	3253.56	3274.1	4669.59	5900.89	7527.08	4925.04	1823.98
3731.51	3241.31	3282.74	4658.11	5896.3	7554.35	4926.56	1834.39
3733.51	3230.81	3287.73	4649.92	5891.78	7563.22	4924.69	1838.58
3735.51	3220.87	3288.08	4645.32	5892.55	7563.49	4922.06	1841.16
3737.51	3211.29	3288.68	4643.3	5898.86	7560.31	4920.49	1843.02
3739.51	3201.84	3288.18	4648.19	5908.92	7558.76	4921.18	1845.93
3741.51	3192.19	3286.46	4662.43	5926.98	7560.91	4925.79	1851.24
3743.5	3186.45	3283.77	4679.75	5948.46	7571.73	4934.03	1859.34
3745.5	3188.37	3286.33	4693.99	5974.93	7586.9	4946.11	1866.84
3747.5	3201.3	3295.43	4707.72	6002.26	7610.14	4963.37	1873.3
3749.5	3220.83	3311.22	4718.19	6033.5	7642.78	4985.31	1880.7
3751.5	3241.89	3331.02	4722.82	6066.26	7664.57	5005.31	1883.48
3753.5	3261.54	3353.84	4719.37	6103.94	7677.08	5023.15	1883.72
3755.5	3278.47	3378.82	4706.71	6140.05	7687.9	5038.39	1883.81
3757.5	3294.02	3400.19	4687.41	6177.13	7697.76	5051.3	1885.33
3759.49	3309.26	3416.9	4662.98	6213.08	7705.35	5061.51	1887.46
3761.49	3321.46	3425.71	4634.43	6246.19	7714.68	5068.5	1892.65
3763.49	3328.13	3427.11	4602.41	6271.16	7732.14	5072.19	1902.73
3765.49	3328.53	3417.04	4569.87	6287.35	7766.45	5073.85	1921.45
3767.49	3325.46	3397.34	4541.67	6293.95	7805.87	5072.86	1943.15
3769.49	3324.31	3369.81	4517.1	6291.8	7859.88	5072.58	1969.77
3771.49	3329.75	3339	4496.71	6279.52	7921.05	5073.21	1996.55
3773.48	3338.93	3304.14	4481.17	6258.52	7976.52	5071.86	2020.03
3775.48	3351.22	3266.63	4470.29	6232.62	8022.74	5068.7	2039.38
3777.48	3368.17	3224.34	4464.19	6206.03	8048.93	5062.33	2051.46
3779.48	3384.21	3178.78	4459.1	6181.63	8064.75	5053.7	2061.23
3781.48	3398.65	3139.22	4456.43	6161.26	8070.34	5045.18	2066.86
3783.48	3414.8	3109.36	4452.75	6142.17	8054.51	5034.72	2062.49
3785.48	3434.67	3089.76	4453.07	6119.12	8020.22	5023.37	2047.55
3787.48	3457.4	3076.48	4457.34	6089.65	7978.15	5011.8	2026.7
3789.47	3481.67	3072.31	4464.01	6053.91	7931.61	5000.7	2000.85
3791.47	3505.11	3076.25	4471.06	6015.34	7883.82	4990.32	1972.45
3793.47	3526.58	3089	4479.78	5967.87	7836.65	4979.97	1941.32
3795.47	3543.27	3108.19	4484.91	5916.81	7796.34	4969.9	1911.93
3797.47	3555.08	3133.96	4488.08	5863.14	7763.39	4960.73	1884.52
3799.47	3562.5	3166.1	4486.94	5811.69	7739.29	4953.3	1860.41
3801.47	3565.63	3202.4	4479.34	5761.11	7722.89	4946.27	1839.76
3803.46	3564.13	3242.9	4463.65	5718.12	7718.14	4941.39	1825.08
3805.46	3559.84	3287.9	4441.12	5682.71	7722.67	4938.85	1815.08
3807.46	3555.81	3335.07	4413.84	5655.36	7724.82	4936.98	1805.24
3809.46	3555.55	3379.39	4385.4	5638.53	7722.87	4936.35	1795.27
3811.46	3559.07	3417.42	4356.29	5633.75	7727.47	4938.8	1790.05
3813.46	3568.14	3446.75	4329.39	5638.22	7741.51	4944.8	1790.28
3815.46	3583.53	3466.03	4308.33	5645.78	7769.68	4954.67	1796.92
3817.46	3602.98	3472.96	4296.23	5657.91	7808.47	4967.71	1809.28
3819.45	3622.67	3465.55	4299.93	5669.99	7850.95	4981.82	1824.61
3821.45	3640.01	3446.91	4314.84	5676.79	7887.52	4993.21	1838.93
3823.45	3652.74	3416.92	4337.43	5681.68	7926.38	5003.03	1856.65
3825.45	3659.4	3380.82	4365.75	5687.54	7972.46	5013.2	1879.4
3827.45	3660.01	3335.07	4399.96	5694.39	8015.92	5021.07	1904.16
3829.45	3654.38	3289.57	4433.95	5700.93	8060.97	5027.96	1930.91
3831.45	3643.48	3247.3	4463.49	5703.72	8103.91	5032.38	1957.3
3833.44	3629.77	3212.05	4480.16	5702.28	8148.75	5034.6	1984.08
3835.44	3616.58	3180.87	4491.49	5697.66	8198.76	5037.07	2012.06
3837.44	3606.67	3151.77	4494.38	5689.38	8250.41	5038.52	2039.97
3839.44	3600.98	3125.29	4493.13	5681.94	8307.2	5041.71	2068.98
3841.44	3597.66	3103.01	4486.52	5672.35	8361.03	5044.12	2095.69
3843.44	3595.98	3083.03	4476.97	5659.8	8406.34	5044.42	2118.27
3845.44	3590.96	3068.17	4466.49	5648.13	8440.5	5042.85	2136
3847.44	3580.85	3056.41	4457.08	5639.64	8463.4	5039.48	2149.58
3849.43	3564.62	3049.38	4445.97	5631.4	8471.98	5032.67	2157.56
3851.43	3543.8	3053.5	4430.8	5624.74	8476.36	5025.84	2162.49
3853.43	3519.18	3070.34	4408.16	5621.2	8472.77	5018.33	2162.81
3855.43	3491.64	3095.75	4380.73	5619.9	8466.15	5010.83	2161.18
3857.43	3462.72	3121.41	4349.17	5620.52	8461.58	5003.08	2161.22
3859.43	3432.68	3143.03	4320.18	5615.44	8460.81	4994.43	2163.49
3861.43	3401.49	3157.44	4292.83	5607.31	8460.95	4984	2167.72
3863.42	3372.85	3168.43	4265.4	5593.82	8463.49	4972.8	2172.93
3865.42	3348.61	3178.81	4238.42	5583.35	8468.65	4963.57	2178.82
3867.42	3329.37	3189.39	4211.49	5577.4	8479.78	4957.48	2186.56
3869.42	3314.63	3195.31	4185.62	5577.34	8486.02	4951.78	2192.86
3871.42	3305.22	3197.08	4165	5581.48	8481.94	4946.14	2194.74
3873.42	3302.87	3196.78	4150.64	5587.56	8465.24	4940.62	2190.25
3875.42	3310.11	3197.75	4145.94	5594.35	8434.55	4936.54	2177.3
3877.42	3329.44	3199.52	4155.37	5596.9	8390.95	4934.43	2155.18
3879.41	3360.65	3203.81	4174.66	5597.77	8336.6	4934.7	2125.08
3881.41	3400.32	3208.46	4201.16	5591.22	8272.56	4934.74	2088.34
3883.41	3441.67	3212.49	4237.23	5579.59	8200.04	4934.2	2046.94
3885.41	3483.52	3216.25	4278.34	5568.76	8123.39	4934.05	2003.72
3887.41	3527.3	3223.11	4318.82	5555.87	8048.6	4934.74	1960.35
3889.41	3573.2	3229.15	4359.87	5541.79	7982.39	4937.28	1920.29
3891.41	3618.54	3236.38	4397.99	5523.86	7931.6	4941.67	1886.32
3893.4	3659.25	3248.08	4434.03	5499.07	7888.96	4945.88	1855.24
3895.4	3691.84	3256.75	4462.29	5473.64	7854.13	4947.73	1830.03
3897.4	3714.48	3262.28	4483.81	5448.36	7823.61	4946.5	1809.57
3899.4	3724.43	3270.86	4495.98	5424.66	7804.77	4944.14	1796
3901.4	3723.98	3277.05	4498.71	5404.65	7797.11	4940.3	1790.1
3903.4	3714.11	3277.39	4493.59	5388.48	7795.67	4933.85	1790.4
3905.4	3698.76	3270.85	4482.25	5372.58	7791.71	4923.23	1792.64
3907.4	3678.5	3258.82	4469.74	5356.26	7777.86	4908.23	1793.08
3909.39	3657.03	3242.74	4456.02	5341.26	7767.28	4892.87	1796.13
3911.39	3633.77	3223.63	4447.8	5327.77	7764.84	4879.56	1803.21
3913.39	3607.62	3206.67	4448.04	5319.39	7774.29	4871.2	1814.88
3915.39	3575.95	3199.73	4460.07	5315.98	7793.58	4869.06	1828.84
3917.39	3539.14	3205.07	4481.92	5318.83	7822.19	4873.43	1844.63
3919.39	3497.42	3223.37	4510.85	5331.73	7851.79	4883.03	1859.29
3921.39	3453.56	3255.11	4543.46	5349.41	7872	4894.71	1868.13
3923.38	3412.34	3299.37	4578.19	5369.6	7891.41	4910.18	1873.98
3925.38	3375.34	3353.89	4612.65	5393.28	7917.56	4930.54	1880.29
3927.38	3345.1	3418.18	4642.14	5423.12	7947.86	4955.28	1885.99
3929.38	3324.83	3487.83	4662.64	5449.79	7970.23	4979.06	1886.07
3931.38	3318.06	3559.76	4674.01	5474.71	7979.77	5001.26	1878.42
3933.38	3332.2	3635.16	4678.8	5490.92	7990.72	5025.56	1866.12
3935.38	3361.95	3707.64	4674.5	5502.43	8003.84	5050.07	1852.18
3937.38	3394.69	3774.55	4662.43	5506.68	8020.59	5071.79	1840.36
3939.37	3428.74	3839.99	4639.87	5502.02	8035.4	5089.2	1828.26
3941.37	3459.67	3902.9	4605.64	5490.35	8049.62	5101.63	1818.02
3943.37	3486.7	3959.3	4561.51	5472.45	8061.46	5108.28	1809.87
3945.37	3510.3	4005.36	4508.91	5450.11	8080.57	5111.05	1808.35
3947.37	3531.21	4036.13	4453.83	5423.12	8103.61	5109.58	1812.19
3949.37	3550.29	4050.45	4397.39	5393.02	8132.69	5104.77	1822.07
3951.37	3568.81	4050.13	4343.61	5357.13	8156.16	5095.17	1832.01
3953.36	3587.15	4034.22	4297.88	5316.57	8176.49	5082.46	1842.43
3955.36	3604.56	4003.12	4268.28	5273.52	8200.98	5070.09	1855.6
3957.36	3616.9	3956.06	4261.45	5225.09	8226.46	5057.19	1870.33
3959.36	3623.12	3900.94	4276.98	5172.98	8244.23	5043.65	1882.28
3961.36	3622.79	3837.8	4312.55	5118.03	8264.97	5031.23	1896.65
3963.36	3616.73	3764.31	4361.39	5060.18	8291.85	5018.89	1916.13
3965.36	3605.68	3682.7	4422.01	5000.59	8316.85	5005.57	1937.45
3967.36	3592.91	3593.55	4494.58	4943.08	8333.42	4991.51	1957.55
3969.35	3578.46	3500.61	4573.15	4884.92	8336.58	4974.74	1974.46
3971.35	3563.76	3420.63	4659.81	4829.81	8333.93	4961.59	1988.06
3973.35	3548.63	3355.17	4753.02	4788.7	8329.71	4955.05	1999.65
3975.35	3532.77	3311.4	4846.09	4765.02	8330.79	4957.22	2010.48
3977.35	3514.43	3288.52	4934.61	4760.73	8342.4	4968.14	2022.63
3979.35	3491.94	3284.97	5015	4771.34	8367.72	4986.19	2037.68
3981.35	3462.81	3297.5	5084.92	4802.51	8394.89	5008.53	2051.38
3983.34	3425.75	3324.94	5147.67	4855.94	8423.41	5035.54	2063.98
3985.34	3381.04	3366.79	5196.43	4926.25	8454.96	5065.09	2076.53
3987.34	3333.03	3414.01	5234.42	5015.02	8490.79	5097.45	2090.9
3989.34	3286.03	3458.49	5257.7	5117.71	8534.9	5130.97	2109.74
[truncated: 1,004 more rows]
