# Supplementary material for: Ionogel thin films as a compatibilizing pretreatment for electrospray deposition
Source: Royal Society of Chemistry journal article supplement (doi:10.1039/d5lp00359h), 2026-01-01
Supplement: d5lp00359h1.zip [file F data.xlsx]

## Sheet: Sheet1
Lateral	Height Data	Height Data	Height Data	Height Data	Height Data
µm	nm	nm	nm	nm	nm
	G1	G2	G3	G4	G5
0	-9.24043	3.1904	3.02318	2.60062	0.927997
1.99867	-4.29631	2.40496	2.40087	2.1887	1.50975
3.99734	1.94897	1.32166	1.18403	1.17335	0.980273
5.996	5.50016	-0.483584	-0.389917	-0.256564	0.03928
7.99467	1.55705	-2.1602	-2.07348	-2.04417	-1.28975
9.99334	4.53056	-4.27323	-4.14469	-3.66194	-2.16755
11.992	6.87938	-6.27252	-5.95073	-4.88186	-3.28908
13.9907	2.93884	-7.95908	-7.4926	-6.42925	-4.1842
15.9893	-5.68559	-9.58978	-8.99336	-7.67507	-4.98813
17.988	-14.3216	-11.2005	-10.2941	-8.94205	-4.84196
19.9867	-15.9288	-12.4929	-11.6342	-9.56205	-4.26462
21.9853	-16.6659	-13.6547	-12.1767	-9.83741	-3.25878
23.984	-16.6029	-14.4231	-12.5148	-9.92969	-2.37077
25.9827	-14.8193	-15.3167	-13.0568	-10.2559	-1.33472
27.9813	-12.189	-16.2039	-13.457	-10.5995	-0.745105
29.98	-7.64457	-16.8522	-13.986	-10.8722	-0.603621
31.9787	-2.03564	-17.5164	-14.385	-11.4551	-1.07116
33.9773	4.74573	-18.2107	-14.6688	-11.7553	-1.16469
35.976	9.76537	-19.0734	-14.9678	-12.36	-1.47461
37.9747	15.1548	-19.7221	-15.1876	-12.5391	-1.72533
39.9734	17.4997	-20.1422	-15.43	-12.6171	-2.2348
41.972	12.414	-20.7091	-15.5951	-13.126	-1.73254
43.9707	8.6179	-21.3077	-16.0521	-13.4218	-1.38931
45.9694	0.880677	-21.5734	-16.414	-13.4734	-0.688662
47.968	-8.62725	-22.1321	-16.5309	-13.5153	0.0754196
49.9667	-14.3376	-22.6218	-16.3742	-13.3508	1.45703
51.9654	-16.9112	-23.1768	-16.3876	-13.4964	2.71931
53.964	-18.6327	-23.7892	-16.2049	-13.3741	4.49901
55.9627	-20.5477	-24.3095	-15.9115	-13.9115	6.60496
57.9614	-22.0925	-24.7289	-15.1226	-14.2957	9.07152
59.96	-23.1836	-25.0294	-14.6637	-15.303	11.3202
61.9587	-24.7106	-25.3258	-13.9226	-16.1966	11.864
63.9574	-25.6472	-25.6271	-12.5885	-17.2053	11.1402
65.956	-25.6723	-25.6987	-9.35826	-18.2815	10.4169
67.9547	-24.7811	-25.9189	-2.84411	-19.5178	9.38918
69.9534	-23.0835	-26.3246	8.25978	-19.985	8.55689
71.952	-20.859	-26.6939	24.1646	-20.51	8.44837
73.9507	-17.4941	-27.151	46.2197	-21.1067	8.56434
75.9494	-12.6892	-27.8395	74.9394	-21.9089	9.30148
77.948	-7.77084	-28.3678	110.995	-22.4915	9.81168
79.9467	-2.28482	-28.844	151.787	-22.9678	10.6985
81.9454	2.2867	-29.3811	194.921	-23.1758	12.0704
83.944	2.6379	-29.858	227.017	-23.0948	14.2389
85.9427	-6.4372	-30.1001	232.47	-23.2182	16.552
87.9414	-13.3016	-30.6205	212.763	-23.3152	19.4382
89.94	-13.6807	-31.1613	174.633	-23.1838	22.8371
91.9387	-10.9694	-31.4006	135.617	-23.0628	26.7976
93.9374	-6.75892	-31.5585	120.642	-22.5186	31.3727
95.936	-1.1896	-31.353	124.558	-21.4016	35.5338
97.9347	5.40017	-31.0223	132.918	-20.4368	40.5826
99.9334	12.6751	-30.5928	145.423	-19.1558	45.6482
101.932	19.4078	-30.1855	161.457	-17.9344	50.6425
103.931	21.844	-29.6156	174.588	-16.8421	56.2141
105.929	23.8528	-29.6765	175.994	-15.8568	61.1986
107.928	27.2021	-29.6264	174.236	-14.3369	65.2828
109.927	30.7442	-29.3172	175.407	-13.281	68.0591
111.925	34.9141	-29.3733	178.106	-11.8188	69.4139
113.924	39.9022	-29.2654	180.635	-10.3042	69.2051
115.923	46.1017	-28.9456	182.96	-8.38025	68.664
117.921	52.9979	-28.3936	184.168	-6.84012	69.816
119.92	61.007	-27.4601	183.613	-5.4024	71.727
121.919	67.684	-27.0323	181.111	-4.53633	74.0424
123.917	71.1999	-26.287	178.984	-3.29819	78.3194
125.916	73.7999	-25.4726	177.308	-2.77907	82.0811
127.915	76.1789	-25.0306	175.863	-2.79878	85.4292
129.913	77.9476	-24.8476	174.133	-3.17238	88.1426
131.912	79.6365	-24.5606	172.666	-3.6463	88.6365
133.911	81.395	-24.2639	171.556	-4.44139	87.3839
135.909	82.9806	-23.9547	170.446	-5.34267	86.1918
137.908	84.3445	-23.3635	169.239	-6.40562	83.5802
139.907	86.425	-22.8897	168.084	-7.02183	80.3844
141.905	88.8423	-22.7959	166.864	-6.93902	78.0169
143.904	92.4467	-22.4797	166.129	-6.5629	77.2007
145.903	96.7783	-22.2331	165.57	-5.77052	77.4059
147.901	101.5	-20.7143	165.354	-5.23407	78.0007
149.9	106.632	-18.1048	165.186	-4.5388	79.1561
151.899	111.52	-13.4081	165.821	-3.99778	80.0669
153.897	115.658	-6.17509	167.117	-3.8215	80.9921
155.896	111.54	4.89053	169.94	-4.55951	82.5431
157.895	102.91	20.3435	174.261	-5.23751	85.3703
159.893	92.1312	40.1737	180.57	-5.37444	88.0424
161.892	80.3175	63.7587	189.603	-5.19752	91.6871
163.891	68.3672	90.1787	201.334	-5.27608	97.0615
165.889	62.6831	113.115	215.185	-5.24174	105.464
167.888	58.0114	120.352	229.111	-5.08281	116.642
169.887	46.3157	115.029	244.407	-4.65778	130.37
171.885	28.3149	100.305	261.744	-4.46368	146.646
173.884	12.5192	78.5611	277.502	-4.36371	163.085
175.883	3.6284	49.7033	290.388	-4.448	172.363
177.881	-0.719747	20.4019	298.432	-3.74789	179.678
179.88	-5.27553	8.95316	300.94	-3.09537	185.543
181.879	-8.9097	2.30821	300.658	-1.56762	188.37
183.877	-12.0858	-5.16909	298.039	-0.27936	185.29
185.876	-13.4312	-12.0439	295.892	1.27696	178.254
187.875	-12.6034	-17.5547	292.667	3.09374	176.702
189.873	-10.2895	-22.0495	289.19	4.82624	173.686
191.872	-4.75644	-25.7341	284.916	6.3318	171.365
193.871	3.72956	-28.6141	280.81	7.55863	170.564
195.869	15.1722	-30.9335	276.148	8.74302	171.855
197.868	30.1967	-32.809	271.915	9.77321	172.048
199.867	47.7733	-34.6994	267.376	11.4563	172.49
201.865	66.8107	-35.6859	261.9	13.519	173.27
203.864	82.1166	-36.7777	256.289	15.633	172.921
205.863	81.1965	-37.4908	251.258	16.7814	167.82
207.861	72.9018	-37.9229	245.654	16.8548	164.2
209.86	64.2388	-38.0579	240.761	17.396	161.357
211.859	54.1228	-37.8769	236.629	18.6163	159.627
213.857	54.4735	-37.095	232.355	21.6261	158.536
215.856	59.6463	-35.9998	228.042	27.4323	159.449
217.855	67.014	-34.6369	223.853	35.8239	159.803
219.853	73.7568	-33.6253	221.173	46.4655	161.107
221.852	75.7443	-32.8427	219.911	60.1835	161.325
223.851	82.0805	-32.6189	219.107	76.6146	159.712
225.849	87.8052	-32.5053	218.509	94.9876	157.151
227.848	91.5962	-31.8772	217.232	113.419	156.687
229.847	93.6377	-30.0049	214.232	126.75	158.501
231.845	96.5427	-26.1279	212.136	117.653	160.787
233.844	98.6967	-20.1689	210.782	98.2334	161.902
235.843	100.171	-11.347	210.096	73.8245	162.666
237.841	102.031	-0.00533565	209.938	63.0867	163.877
239.84	103.805	14.1587	211.245	58.321	165.151
241.839	105.646	30.864	213.11	53.8062	166.766
243.837	106.687	48.4112	217.017	49.0271	168.21
245.836	108.565	62.8804	222.196	45.1804	169.798
247.835	110.138	63.4444	227.314	41.9243	170.469
249.833	112.076	54.2255	230.39	38.6813	172.615
251.832	115.329	36.8462	233.054	36.5273	176.257
253.831	119.197	17.4548	237.223	34.3988	182.207
255.829	124.296	3.47664	239.368	33.3402	190.211
257.828	130.135	-2.71431	237.031	32.8566	201.112
259.827	137.672	-1.8616	235.797	32.7871	213.053
261.825	146.114	2.80325	234.783	33.3889	224.657
263.824	154.556	11.9877	234.113	33.8806	233.766
265.823	159.718	26.1693	234.032	34.5672	244.042
267.821	156.413	45.4483	234.404	34.2169	254.642
269.82	149.669	69.3637	235.211	32.3875	265.694
271.819	141.32	95.744	237.357	28.7837	280.072
273.817	130.372	112.226	240.154	26.8013	301.19
275.816	114.746	118.922	243.501	25.5761	313.259
277.815	101.66	117.47	247.764	25.169	333.564
279.813	87.8579	113.098	253.917	24.6811	384.972
281.812	80.868	109.057	261.216	24.7734	450.672
283.811	76.5538	106.422	268.17	25.2732	533.236
285.809	73.4984	109.669	273.902	26.1749	631.352
287.808	70.7814	101.663	277.935	28.2431	724.549
289.807	68.6807	83.1175	279.967	31.9185	774.117
291.805	67.7751	56.659	279.598	37.1852	785.177
293.804	68.0078	29.7366	278.332	44.6088	817.382
295.803	68.1497	7.73874	276.944	53.877	864.797
297.801	68.8946	-2.91141	275.868	64.614	906.644
299.8	67.4405	-10.6682	274.456	76.8682	948.223
301.799	68.0053	-17.4054	273.109	91.0241	983.788
303.797	71.7633	-22.4944	272.557	105.273	973.443
305.796	77.3358	-26.9587	272.803	111.927	930.359
307.795	83.9784	-30.1682	272.918	105.961	893.364
309.793	91.9729	-32.5581	273.028	92.6119	850.143
311.792	94.5224	-34.8065	272.964	78.9544	801.818
313.791	93.8965	-37.2033	273.693	67.6028	795.603
315.789	97.7802	-39.442	274.091	57.4308	798.022
317.788	103.088	-40.5468	274.294	48.7707	762.967
319.787	111.101	-40.9595	273.601	43.2061	706.43
321.785	115.491	-40.669	273.152	38.4037	648.262
323.784	123.356	-39.9737	272.295	34.9982	579.026
325.783	132.264	-39.2985	271.991	33.4505	513.651
327.781	137.569	-39.0726	271.93	34.4206	481.489
329.78	141.574	-38.3245	271.944	38.3565	466.405
331.779	144.79	-37.4429	272.298	45.7635	459.547
333.777	147.436	-36.3164	272.621	55.1903	471.857
335.776	150.341	-35.2053	271.114	67.4977	507.562
337.775	153.451	-33.4136	268.727	83.9161	552.32
339.773	157.089	-32.1376	265.997	104.368	591.706
341.772	161.006	-31.5495	263.14	125.556	637.521
343.771	165.872	-31.1009	262.236	143.233	683.984
345.769	170.283	-31.0517	262.321	141.008	739.12
347.768	173.578	-31.4345	262.815	124.79	783.832
349.767	178.344	-31.5526	264.234	101.294	790.148
351.765	183.344	-30.8587	266.837	85.0827	777.631
353.764	188.056	-29.5602	269.851	91.3456	759.371
355.763	189.02	-28.275	272.705	106.416	734.246
357.761	185.291	-26.6126	274.429	126.85	709.763
359.76	180.346	-24.5591	276.346	153.021	704.659
361.759	172.936	-20.4855	277.918	181.947	704.968
363.757	166.788	-14.5596	278.578	199.689	706.707
365.756	162.135	-7.66015	278.592	196.351	717.445
367.755	170.668	0.187105	278.332	189.38	740.155
369.753	174.07	5.18298	277.46	180.467	770.5
371.752	175.783	7.00456	277.428	174.409	801.275
373.751	179.638	6.48956	277.474	168.998	837.762
375.75	183.461	5.36217	278.631	166.209	884.974
377.748	191.479	5.46464	280.941	166.889	954.646
379.747	190.887	5.87715	284.247	166.899	1062.4
381.746	181.169	6.09582	288.748	162.518	1216.74
383.744	171.513	6.74875	294.756	158.135	1378.13
385.743	159.547	7.15617	301.307	154.191	1540.59
387.742	156.835	7.98768	305.177	149.547	1709.98
389.74	158.126	8.613	308.254	145.718	1876.75
391.739	162.511	9.13438	310.644	141.833	2056.49
393.738	159.427	9.36582	312.966	136.664	2257.23
395.736	148.47	10.2187	315.102	129.762	2457.07
397.735	141.151	11.7499	316.793	120.253	2659.14
399.734	141.988	14.3453	317.645	111.58	2859.48
401.732	155.029	18.5352	318.198	102.506	3068.94
403.731	171.225	24.1352	319.228	92.3183	3285.75
405.73	179.582	31.6357	320.835	78.9708	3500.43
407.728	173.143	41.3166	322.325	67.3428	3704.87
409.727	162.728	53.6528	324.374	58.361	3878.57
411.726	152.026	68.6119	326.033	51.157	4026.59
413.724	142.219	84.5605	327.859	44.8876	4178.21
415.723	147.977	97.2809	328.296	40.5571	4354.48
417.722	164.395	104.135	327.62	38.1183	4541.95
419.72	189.044	112.603	327.286	37.1157	4717.35
421.719	212.924	123.77	328.524	37.8694	4880.68
423.718	229.046	137.375	331.258	39.8219	5044.61
425.716	240.532	153.516	336.016	43.0521	5203.98
427.715	250.812	170.535	342.147	46.8506	5374.02
429.714	265.471	187.38	349.9	46.8947	5552.17
431.712	281.352	198.374	357.065	47.9868	5735.74
433.711	297.337	193.46	360.987	50.1432	5898.14
435.71	315.925	172.25	360.299	53.422	6028.77
437.708	331.143	141.406	352.884	57.8826	6121.37
439.707	341.056	107.14	342.31	64.3922	6195.46
441.706	350.112	71.2072	332.014	73.0899	6241.71
443.704	358.982	45.971	322.673	84.0842	6251.36
445.703	366.15	29.7539	316.995	97.319	6228.93
447.702	377.432	17.566	311.58	111.998	6180.44
449.7	393.269	7.37782	307.133	128.133	6122.37
451.699	415.16	-1.26081	303.077	147.118	6094.22
453.698	446.264	-7.72352	299.783	165.463	6095.11
455.696	484.5	-12.3148	296.663	176.305	6111.42
457.695	518.526	-15.1926	294.19	182.507	6144.79
459.694	556.341	-16.5548	292.379	187.709	6155.09
461.692	601.362	-16.0283	290.746	191.903	6158.81
463.691	657.452	-13.7485	289.425	196.903	6166.77
465.69	721.592	-9.88463	289.712	203.646	6154.82
467.688	794.028	-4.84598	293.771	211.313	6119.1
469.687	873.502	-0.380617	300.048	216.179	6064.56
471.686	963.722	3.58691	310.034	215.497	5999.86
473.684	1067.07	5.15052	324.513	202.531	5954.74
475.683	1180.85	5.78938	344.345	182.028	5917.73
477.682	1291.28	7.31513	368.288	175.191	5867.38
479.68	1410.4	8.32329	396.914	171.757	5790.57
481.679	1532.79	8.91623	428.821	168.646	5696.06
483.678	1656.81	8.50522	461.509	167.492	5586.24
485.676	1787.31	8.48108	474.229	167.592	5465.68
487.675	1923.07	10.0663	454.237	168.076	5351.16
489.674	2047.49	13.349	437.598	169.634	5252.81
491.672	2165.27	19.0852	424.031	171.415	5164.18
493.671	2286.6	28.3847	412.779	176.071	5078.97
495.67	2416.82	41.5986	408.155	182.522	5003.54
497.668	2545.8	58.2587	405.149	191.992	4943.16
499.667	2675.83	77.8108	398.786	208.076	4891.27
501.666	2809.66	98.4971	389.556	230.257	4843.88
503.664	2938.05	120.383	381.04	254.53	4783.73
505.663	3053.02	130.5	374.465	277.091	4714.32
507.662	3160.42	125.179	367.839	296.84	4642.16
509.66	3265.07	110.361	361.748	292.14	4564.76
511.659	3366.66	90.4097	357.047	267.826	4484.32
513.658	3467.43	68.2069	353.768	242.846	4409.06
515.656	3573.49	51.176	351.265	233.872	4339.2
517.655	3693.5	45.1207	350.336	257.829	4272.05
519.654	3810.18	40.166	350.109	292.603	4208.96
521.652	3918.46	36.4872	350.053	338.98	4157.48
523.651	3999.48	34.0237	349.762	395.535	4108.32
525.65	4051.73	30.9869	348.882	459.594	4063.85
527.648	4098.14	27.2616	348.154	500.822	4015.86
529.647	4151.08	25.436	348.345	514.078	3963.76
531.646	4218.07	23.9996	350.279	513.098	3915.35
533.644	4302.46	23.5155	353.686	501.775	3873.3
535.643	4385.46	21.0088	360.555	494.742	3831.28
537.642	4461.58	19.7623	372.352	500.444	3792.47
539.64	4523.36	19.7508	389.66	515.041	3769.29
541.639	4560.79	19.6429	413.647	532.703	3759.41
543.638	4579	18.7864	443.443	556.905	3762.15
545.636	4591.58	19.5624	476.528	596.78	3775.14
547.635	4608.2	20.7436	510.123	667.083	3788.49
549.634	4629.84	21.6694	538.913	796.092	3800.69
551.632	4678.25	21.7081	545.777	1005.9	3805.7
553.631	4730.35	23.4122	536.715	1271.48	3806.21
555.63	4785.87	26.0626	531.134	1560.75	3806.95
557.628	4837.59	30.8966	528.757	1880.63	3799.14
559.627	4885.14	36.8377	526.144	2217.18	3790.15
561.626	4927.31	43.0473	523.174	2574.59	3781.95
563.624	4962.96	49.5769	520.166	2934.71	3772.72
565.623	4990.02	57.3987	517.863	3300.93	3764.3
567.622	4992.72	64.8991	515.945	3665.19	3757.28
569.62	4972.29	73.9942	513.344	4002.41	3746.01
571.619	4928.92	83.5347	511.042	4299.62	3729.63
573.618	4868.38	94.6653	509.462	4571.79	3705.02
575.616	4796.26	106.352	508.301	4845.92	3678.58
577.615	4719.61	118.132	506.808	5132.71	3654.31
579.614	4648.78	128.897	505.749	5430.12	3632.9
581.612	4589.88	138.678	505.313	5704.1	3615.5
583.611	4548.7	147.417	505.594	5956.19	3600.36
585.61	4520.89	157.698	506.591	6195.53	3585.42
587.608	4506.55	167.435	509.429	6417.1	3569.88
589.607	4503.75	177.81	514.613	6615.07	3555.45
591.606	4493.51	188.164	523.113	6806	3551.89
593.604	4468.95	195.996	534.308	6974.57	3562.81
595.603	4426.38	209.406	548.327	7119.64	3585.62
597.602	4375.81	221.159	564.464	7238.06	3603.19
599.6	4320.05	234.116	581.862	7339.62	3611.97
601.599	4259.81	245.862	597.167	7407.53	3615.6
603.598	4202.36	252.289	604.048	7449.28	3613.02
605.596	4166.12	257.64	601.935	7457.39	3611.18
607.595	4140.24	262.057	600.018	7433.47	3612.16
609.594	4118.74	268.585	597.9	7387.09	3610.62
611.592	4093.3	279.304	595.637	7339.24	3600.42
613.591	4053.7	299.101	595.723	7304.27	3586.94
615.59	4005.43	322.539	594.829	7269.95	3575.68
617.588	3950.53	336.714	594.449	7228.29	3573.11
619.587	3890.02	330.847	594.546	7165.1	3578.76
621.586	3826.49	335.039	595.222	7077.2	3589.92
623.584	3760.43	340.569	597.496	6959.5	3607.41
625.583	3703.22	337.728	600.796	6831.99	3630.11
627.582	3659.92	326.419	604.598	6703.18	3653.67
629.58	3619.76	314.618	608.883	6574.67	3674.53
631.579	3584.45	303.384	613.792	6494.24	3688.15
633.578	3554.97	296.886	620.352	6420.75	3684.08
635.576	3525.94	292.446	628.49	6354.53	3666.4
637.575	3501.91	289.368	637.47	6291.5	3642.06
639.574	3484.66	287.983	650.265	6251.16	3621.18
641.572	3472.86	285.484	671.348	6219.26	3597.69
643.571	3460.11	283.864	702.006	6201.23	3576.33
645.57	3438.99	282.948	740.977	6205.05	3561.18
647.568	3412.1	283.942	788.689	6188.18	3550.73
649.567	3385.21	283.476	845.339	6154.53	3552.23
651.566	3358.72	280.211	897.988	6117.83	3563.86
653.564	3335.74	284.079	930.344	6066.04	3576.32
655.563	3306.54	289.689	952.581	6001.02	3594.27
657.562	3274.79	296.012	987.269	5913.53	3613.66
659.56	3241.35	299.872	1019.17	5809.74	3630.03
661.559	3210.94	298.498	1035.57	5708.82	3645.82
663.558	3184.42	295.993	1039.63	5612.14	3657.18
665.556	3157.35	293.294	1067.81	5518.96	3660.83
667.555	3129.27	294.505	1094.25	5392.42	3658.8
669.554	3104.62	297.841	1069.14	5251.83	3652.42
671.552	3086.05	302.827	999.439	5116.33	3643.84
673.551	3071.54	309.562	917.596	5001.71	3637.22
675.55	3060.56	318.893	851.059	4902.45	3623.06
677.548	3051.19	333.138	812.7	4829.22	3603.89
679.547	3046.75	352.767	797.336	4778.04	3586.46
681.546	3048.41	380.091	802.079	4737.79	3574.2
683.544	3057.73	413.615	810.307	4706.79	3572.37
685.543	3073.39	451.527	792.446	4680.73	3582.66
687.542	3086.59	489.173	739.657	4656.12	3600.47
689.54	3090.61	505.746	672.811	4633.59	3624.96
691.539	3085.42	510.049	605.615	4617.07	3651.87
693.538	3073.11	514.247	562.798	4597.8	3669.08
695.536	3056.46	532.95	547.484	4571.81	3680.84
697.535	3035.32	553.275	522.483	4539.38	3682.87
699.534	3013.28	577.274	483.018	4503.52	3678.79
701.532	2991.73	599.487	434.931	4467.3	3669.03
703.531	2974.84	610.812	388.476	4440.93	3658.01
705.53	2963.25	622.719	362.418	4411.95	3650.62
707.528	2948.99	643.362	349.328	4381.41	3644.11
709.527	2937	659.083	335.7	4345.48	3632.04
711.526	2933.77	666.87	323.128	4302.52	3620.12
713.524	2939.92	695.771	311.926	4264.06	3610.85
715.523	2948.58	733.682	304.343	4228.94	3603.08
717.522	2959.66	766.874	302.895	4204.35	3590.52
719.52	2972.36	800.814	310.263	4193.7	3573.54
721.519	2977.06	852.566	326.48	4189.48	3559.61
723.518	2970.51	901.429	353.298	4179.66	3551.23
725.516	2954.48	955.922	386.025	4155.48	3549.99
727.515	2933.53	996.217	419.579	4118.34	3546.74
729.514	2912.36	1001.52	452.631	4071.77	3544.69
731.512	2894.27	1016.37	483.351	4026.79	3547.16
733.511	2880.24	1035	499.934	3993.36	3548.55
735.51	2874	1058.51	500.159	3975.41	3545.46
737.508	2871.85	1095.51	496.2	3967.15	3547.98
739.507	2870.29	1143.96	485.633	3962.63	3562.59
741.506	2869.92	1214.85	477.28	3957.63	3580.59
743.504	2867.59	1306.56	473.862	3952.1	3606.08
745.503	2868.81	1393.79	475.869	3946.8	3649.43
747.502	2869.83	1466.55	484.385	3942.05	3719.99
749.5	2865.77	1515.24	500.783	3935.74	3827.36
751.499	2850.84	1555.7	533.519	3923.37	3984.07
753.498	2828.51	1591.79	577.542	3906.67	4187.37
755.496	2803.88	1630.75	613.42	3881.62	4422.38
757.495	2783.22	1678.27	642.023	3852.94	4682.5
759.494	2766.78	1740.08	671.975	3831.7	4937.52
761.492	2754.1	1832.23	707.22	3815.28	5180.42
763.491	2745.8	1930.76	737.072	3799.31	5386.88
765.49	2745.45	2028	775.518	3773.58	5541.47
767.488	2747.59	2130.61	805.38	3742.59	5635.56
769.487	2749.76	2238.92	798.193	3712.25	5656.8
771.486	2750.43	2338.57	761.43	3684.9	5609.06
773.484	2746.9	2428.86	708.897	3665.33	5490.82
775.483	2744.48	2520.9	654.346	3663.44	5284.53
777.482	2745.73	2618.1	640.897	3685.13	4988.46
779.48	2752.45	2719.07	648.474	3730.16	4608.99
781.479	2761.94	2812.77	687.78	3782.33	4160.57
783.478	2768.19	2906.98	736.686	3836.25	3661.48
785.476	2769.61	3008.9	758.913	3891.11	3121.31
787.475	2765.64	3122.95	756.634	3952.42	2570.93
789.474	2756.82	3244.6	739.026	4028.87	2046.67
791.472	2748.54	3350.83	724.184	4120.39	1587.69
793.471	2740.49	3447.66	726.253	4226.91	1237.55
795.47	2734.42	3538.08	759.228	4343.99	1004.3
797.468	2723.78	3619.61	818.715	4473.5	819.865
799.467	2710.84	3689.42	906.156	4600.5	665.682
801.466	2694.6	3762.11	1019.01	4710.85	536.676
803.464	2676.36	3851.34	1109.86	4797.25	429.866
805.463	2653.57	3966.19	1195.66	4834.55	344.254
807.462	2630.26	4103.04	1287.68	4813.24	273.69
809.46	2610.02	4251.71	1404.53	4714.21	216.177
811.459	2601.32	4383.99	1568.92	4531.23	171.271
813.458	2607.03	4480.98	1762.79	4260.29	134.348
815.456	2621.66	4554.41	1973.92	3903.98	105.297
817.455	2636.02	4613.01	2204.74	3475.92	81.7275
819.454	2653	4665.03	2442.48	3003.29	62.702
821.452	2672.29	4715.12	2681.07	2507.38	47.3896
823.451	2684.2	4764.03	2929.78	2001.4	35.2195
825.45	2686.76	4817.03	3169.01	1523.98	25.4875
827.448	2685.81	4873.48	3416.83	1116.99	17.9778
829.447	2685.02	4917.3	3670.96	861.858	12.0169
831.446	2684.56	4948.6	3934.77	670.785	6.7994
833.444	2683.69	4969.78	4201.28	531.7	3.05867
835.443	2686.99	4997.51	4437.35	438.751	0
837.442	2698.07	5023.98	4643.88	397.795	-2.43531
839.44	2714.8	5039.71	4845.62	418.461	-3.93807
841.439	2725.2	5054.35	5041.11	512.538	-5.0016
843.438	2721.5	5074.36	5232.9	691.547	-3.27026
845.436	2709.92	5098.42	5431.69	970.708	6.49746
847.435	2691.79	5136.48	5625.66	1320.59	30.5912
849.434	2675.32	5149.92	5813.62	1753.55	79.9068
851.432	2665.79	5142.88	5981.64	2304.44	168.968
853.431	2661.75	5122.53	6124.79	2976.96	317.338
855.43	2657.67	5092.07	6258.14	3714.05	546.939
857.428	2655.9	5057.31	6383.51	4445.79	881.992
859.427	2651.07	5024.43	6507.71	5148.18	1343.57
861.426	2645.66	4993.44	6621.02	5812.94	1948.82
863.424	2646.81	4961.14	6709.16	6439.31	2665.48
865.423	2651.6	4918.46	6772.18	7031.11	3441.57
867.422	2653.39	4862.22	6818.61	7584.21	4269.25
869.42	2657.1	4793.87	6849.12	8103.05	5135.06
871.419	2661.29	4713.51	6820.22	8594.23	6004.11
873.418	2664.55	4626.25	6742.65	9075.83	6870.03
875.416	2663.82	4546.85	6624.88	9530.18	7732.88
877.415	2661.8	4485.34	6508.49	9946.53	8592.18
879.414	2659.42	4430.02	6418.37	10336	9450.46
881.412	2656.77	4404.17	6340.95	10719.8	10329.9
883.411	2653.47	4383.83	6264.06	11094.9	11210.9
885.41	2652.35	4355.77	6203.61	11445.1	12082.3
887.408	2653.82	4320.65	6153.18	11751.1	12896.8
889.407	2649.2	4281.85	6093.47	11993	13624.8
891.406	2639.83	4239.45	6016.67	12166.1	14249.1
893.404	2631.99	4196.7	5940.55	12286.4	14759.9
895.403	2626.86	4151.91	5873.47	12354.6	15150.9
897.402	2628.54	4104.58	5804.33	12387.8	15404.6
899.4	2629.19	4057.82	5742.61	12411.4	15529.4
901.399	2624.86	4019.66	5716.94	12449.9	15540
903.398	2618.81	3983.47	5733.5	12564.2	15455.7
905.396	2614.81	3946.68	5779.12	12793.7	15286.9
907.395	2615.08	3909.86	5797.42	13126.8	15072.9
909.394	2618.83	3873.22	5793.16	13569	14854.1
911.392	2624.52	3836.13	5769.2	14119.5	14678.8
913.391	2627.39	3799.22	5743.76	14666.4	14609.8
915.39	2623.8	3761.02	5721.23	15152.2	14594.4
917.388	2614.66	3719.66	5703.4	15543.9	14584.3
919.387	2603.11	3674.27	5687.31	15827	14568.5
921.386	2592.6	3629.83	5675.14	15984.3	14553.1
923.384	2587.57	3585.3	5653.56	16007.6	14535.6
925.383	2585.61	3538.18	5615.08	15878.5	14520.4
927.382	2584.47	3492.64	5569.48	15593.1	14492.7
929.38	2588.22	3450.72	5525.3	15159.3	14457.7
931.379	2597.85	3419.18	5482.13	14583.4	14416.9
933.378	2609.85	3398.92	5432.06	13928.6	14366.6
935.376	2618.17	3389.14	5378.83	13307.5	14310.8
937.375	2623.8	3384.21	5330.19	12861.4	14251.6
939.374	2625.64	3379.77	5278.28	12630.2	14169.1
941.372	2619.72	3373.75	5218.45	12445.8	14047.6
943.371	2605.45	3367.9	5156.22	12255.6	13882.3
945.37	2582.72	3363.7	5103.71	12055.9	13670.2
947.368	2556.81	3359.13	5050.07	11854.1	13415.6
949.367	2530.33	3348.33	4996.52	11655.7	13141.5
951.366	2513.85	3332.54	4941.18	11466.8	12874.3
953.364	2503.8	3314.15	4891.13	11294.8	12630.4
955.363	2493.58	3296.38	4833.05	11146.8	12416.4
957.362	2483.02	3281.03	4780.86	11005	12225.6
959.36	2473.06	3276.96	4747.55	10859	12047.7
961.359	2465.81	3268.82	4731.34	10723.4	11874.5
963.358	2455.61	3255.59	4715.82	10603	11705.3
965.356	2441.48	3241.09	4691.26	10450.6	11536.7
967.355	2428.83	3229.81	4663.63	10246.7	11364.1
969.354	2418.21	3222.99	4640.08	9988.88	11187.5
971.352	2410.25	3222.55	4629.35	9695.89	11015.9
973.351	2408.79	3220.87	4625.04	9394.39	10849.2
975.35	2421.71	3212.42	4632.37	9122.03	10697.2
977.348	2441.99	3200.45	4643	8911.22	10560.9
979.347	2460.37	3189.93	4658.56	8761.34	10432.6
981.346	2477.2	3181.21	4671.23	8672.27	10314.3
983.344	2489.84	3174.39	4682.12	8637.13	10209.9
985.343	2502.83	3166.11	4688.17	8657.56	10120.5
987.342	2520.84	3153.6	4684.77	8726.56	10048.8
989.34	2548.2	3138.02	4671.67	8828.02	9995.66
991.339	2578.25	3121.69	4655.23	8951.11	9946.23
993.338	2609.4	3107.28	4641.24	9092.57	9891.61
995.336	2633.23	3097.07	4621.21	9237.22	9836.48
997.335	2649.07	3099.85	4590.63	9378.62	9778.65
999.334	2655.98	3112.79	4556.47	9508.72	9713.9
1001.33	2655.44	3120.65	4507.35	9626.48	9642.66
1003.33	2649.69	3124.1	4446.77	9720.57	9569.88
1005.33	2643.71	3123.39	4380.09	9758.74	9491.29
1007.33	2643.13	3120.22	4308.63	9718.5	9405.74
1009.33	2639.77	3112.25	4238.07	9605.09	9315.39
1011.33	2631.98	3103.31	4168.17	9425.03	9223.1
1013.32	2626.08	3090.7	4107.22	9180.63	9143.64
1015.32	2615.7	3072.35	4062.5	8899.34	9079.48
1017.32	2600.47	3049.37	4027.63	8619.49	9043.62
1019.32	2581.59	3023.62	4004.39	8390.82	9023.85
1021.32	2562.25	2996.79	3983.2	8242.78	9007.53
1023.32	2546.16	2973.34	3961.02	8134.64	9009.08
1025.32	2535.51	2955.87	3936.59	8063.51	9031.08
1027.32	2527.61	2943.66	3917.05	8029.66	9076.48
1029.31	2517.66	2941.71	3899.17	8029.03	9146.88
1031.31	2510.97	2949.35	3886.91	8059.69	9235.99
1033.31	2509.87	2954.48	3867.93	8118.32	9319.2
1035.31	2512.46	2951.09	3847.93	8201.85	9390.84
1037.31	2515.02	2942.26	3825.14	8299.44	9450.88
1039.31	2513.68	2929.77	3799.67	8404.2	9501.91
1041.31	2507.29	2916.95	3777.59	8512.64	9541.68
1043.3	2500.02	2905	3760.1	8615.36	9573.03
1045.3	2488.49	2897.43	3743.44	8698.89	9592.41
1047.3	2474.37	2889.09	3728.09	8726.01	9592.35
1049.3	2458.39	2881.14	3718.07	8696.92	9583.45
1051.3	2441.28	2874.96	3711.91	8619.87	9573.55
1053.3	2424.84	2874.66	3703.21	8503.18	9573.89
1055.3	2403.33	2883.51	3691.41	8358.12	9585.08
1057.3	2384.02	2903.03	3685.4	8210.48	9603.71
1059.29	2371.41	2924.66	3690.9	8096.36	9619.25
1061.29	2363.83	2945.82	3703.16	8018.64	9618.2
1063.29	2356.66	2965.35	3712.05	7968.61	9597.17
1065.29	2349.18	2979.3	3716.15	7929.04	9554.16
1067.29	2341.22	2987.45	3717.84	7901.5	9475.67
1069.29	2331.43	2990.35	3710.1	7868.31	9371.88
1071.29	2325.46	2990.65	3690.81	7831.91	9247.76
1073.28	2324.77	2988.15	3664.34	7788.92	9112.67
1075.28	2325.08	2984.04	3635.58	7734.75	8981.23
1077.28	2326.03	2973.78	3600.89	7676.83	8872.29
1079.28	2334.15	2954.72	3560.46	7618.59	8797.93
1081.28	2357.16	2929.36	3535.14	7569.61	8768.93
1083.28	2407.49	2900.03	3530.27	7529.33	8776.05
1085.28	2499.38	2868.64	3537.2	7491.83	8822.36
1087.28	2635.64	2841.1	3550.61	7450.52	8902.13
1089.27	2807.76	2822.99	3566.75	7398.87	9018.47
1091.27	2998.18	2814.1	3581.41	7340.25	9159.89
1093.27	3205.93	2812.44	3596.7	7277.07	9303.99
1095.27	3422.44	2818.58	3605.76	7209.97	9404.68
1097.27	3631.6	2825.8	3608.99	7135.27	9439.51
1099.27	3825.45	2835.71	3604.93	7054.05	9390.46
1101.27	3990.77	2842.96	3589.12	6972.57	9265.82
1103.26	4135.01	2846.9	3563.74	6896.52	9074.72
1105.26	4263.6	2845.61	3530.54	6826.65	8823.69
1107.26	4380.4	2837.36	3495.92	6769.18	8547.37
1109.26	4486.78	2820.25	3468.87	6725.73	8292.96
1111.26	4582.98	2796.74	3449.98	6692.8	8091.61
1113.26	4671.36	2770.03	3433.41	6662.91	7944.4
1115.26	4754.34	2745.23	3410.43	6631.2	7821.73
1117.26	4837.21	2718.3	3383.83	6601.54	7731.75
1119.25	4917.91	2693.7	3362.03	6575.8	7679.45
1121.25	4994.58	2677.17	3339.48	6557.5	7656.69
1123.25	5065.54	2672.52	3317.5	6549.94	7662.75
1125.25	5135.1	2689.04	3299.95	6550.35	7696.89
1127.25	5199.23	2716.87	3289.79	6553.44	7745.64
1129.25	5254.59	2761.95	3284.55	6548.6	7805.2
1131.25	5303.44	2831.89	3281.88	6537.8	7867.9
1133.24	5348	2933.69	3284.71	6530.43	7931.23
1135.24	5390.29	3061.43	3290.8	6527.59	8004.48
1137.24	5437.06	3214.12	3302.56	6529.84	8072.97
1139.24	5491.84	3386.8	3309.16	6529.47	8139.81
1141.24	5547.64	3578.04	3316.95	6513.42	8194.82
1143.24	5598.38	3785.66	3333.93	6487.23	8239.03
1145.24	5638.95	4019.28	3364.31	6452.81	8266.75
1147.24	5668.37	4268.48	3409.44	6413.27	8264.46
1149.23	5691.21	4515.25	3467.39	6375.34	8224.84
1151.23	5709.72	4755.52	3550.77	6331.41	8154.75
1153.23	5718.02	4980.09	3673.51	6283.17	8055.19
1155.23	5714.98	5191.77	3839.77	6235.69	7928.38
1157.23	5696.25	5383.04	4053.32	6181.91	7786.84
1159.23	5665.9	5559.03	4311.52	6118.67	7643.26
1161.23	5624.62	5731.59	4609.17	6048.08	7518.91
1163.22	5573.77	5902.6	4930.06	5973.76	7431.57
1165.22	5518.6	6072.44	5286.52	5900.08	7362.16
1167.22	5465.99	6243.95	5686.96	5830.48	7311.68
1169.22	5420.3	6421.02	6125.22	5754.27	7272.41
1171.22	5382.74	6607.15	6601.1	5672.73	7237.63
1173.22	5340.79	6782.31	7093.65	5599.53	7216.05
1175.22	5296.29	6942.55	7580.73	5547.02	7216.3
1177.22	5250.88	7084.12	7996.44	5519.33	7244.5
1179.21	5209.63	7196.49	8328.48	5518.9	7297.12
1181.21	5169.2	7271.09	8571.78	5538.61	7378.87
1183.21	5136.84	7308.99	8730.77	5574.82	7489.69
1185.21	5120.53	7318.3	8808.07	5621.63	7615.15
1187.21	5120.53	7302.95	8815.77	5690.36	7742.55
1189.21	5130.97	7264.09	8767.68	5779.02	7861.79
1191.21	5151.46	7206.6	8676.56	5888.34	7973.03
1193.2	5181.07	7135.47	8581.08	6014.82	8056.51
1195.2	5218.38	7054.2	8519.41	6147.94	8101.02
1197.2	5255.49	6972.51	8509.61	6280.5	8084.48
1199.2	5289.42	6904.84	8504.11	6396.07	8008.72
1201.2	5320.78	6850.7	8504.01	6486.1	7881.71
1203.2	5344.43	6821.63	8500.91	6546.33	7709.29
1205.2	5352.49	6800.5	8489.39	6568.43	7525.61
1207.2	5342.74	6777.06	8478.36	6553.34	7347.01
1209.19	5317.99	6750.98	8475.78	6499.15	7201.9
1211.19	5275.99	6710.96	8487.85	6406.02	7065.85
1213.19	5217.41	6656.71	8506.17	6271.88	6942.14
1215.19	5143.31	6596.41	8533.2	6112.07	6830.14
1217.19	5061.24	6537.64	8571.3	5945.35	6731.58
1219.19	4981.13	6489.95	8617.64	5822.32	6654.36
1221.19	4911.55	6457.96	8672.56	5728.35	6595.11
1223.18	4860.05	6443.89	8734.25	5653.74	6554.04
1225.18	4816.04	6454.35	8796.66	5595.06	6534.69
1227.18	4778.93	6478.76	8852.69	5551.87	6522.56
1229.18	4753.17	6500.5	8884.71	5524.97	6515.32
1231.18	4745.1	6510.26	8896.74	5516.8	6512.95
1233.18	4744.45	6503.29	8891.78	5530.29	6507.18
1235.18	4738.53	6479.9	8867.55	5561.05	6509.45
1237.18	4728.9	6433.69	8829.3	5607.94	6520.27
1239.17	4719.86	6379.35	8780.82	5659.29	6542.73
1241.17	4713.51	6325.87	8734.43	5700.28	6578.05
1243.17	4704.49	6276.35	8680.07	5723.51	6623.14
1245.17	4694.53	6238.5	8608.83	5725.77	6659.58
1247.17	4687.15	6231.16	8518.64	5718.19	6689.14
1249.17	4684.7	6263.82	8407.91	5700.75	6702.13
1251.17	4683.55	6309.24	8279.28	5677.97	6699.74
1253.16	4677.43	6363.15	8146.81	5658.82	6684.36
1255.16	4667.66	6421.27	8029.49	5653.02	6654.55
1257.16	4656.96	6471.72	7929.31	5650.7	6609.79
1259.16	4647.09	6519.5	7844.38	5648.19	6558.3
1261.16	4634.15	6567.18	7770.12	5638.08	6508.31
1263.16	4615.38	6621.2	7712.09	5623.56	6461.83
1265.16	4590.9	6685.81	7668.9	5608.58	6437.44
1267.16	4563.24	6762.95	7638.28	5595.39	6436.29
1269.15	4532.95	6853.44	7606	5583.97	6446.28
1271.15	4499.11	6930.77	7542.27	5570.82	6454.86
1273.15	4459.67	6983.31	7454.67	5560.03	6469.36
1275.15	4416.05	7017.87	7347.08	5554.26	6494.22
1277.15	4370.69	7036.11	7236.88	5560.42	6531.64
1279.15	4320.56	7039.64	7154.58	5584.63	6584.63
1281.15	4268.83	7033.77	7096.99	5630.73	6657.2
1283.14	4219.17	7021.17	7044.31	5676.29	6750.11
1285.14	4175.92	7006.78	6987.58	5727.2	6867.23
1287.14	4138.74	6997.59	6922.26	5780.7	7012.05
1289.14	4106.99	6997.11	6842.7	5841.43	7183.24
1291.14	4082.36	6999.65	6754.94	5902.52	7368.75
1293.14	4063.33	7001.08	6668.95	5946.89	7544.94
1295.14	4051.62	6991.62	6592.7	5973.48	7694.85
1297.14	4049.05	6968.97	6535.03	5971.77	7802.37
1299.13	4050.04	6935.23	6497.51	5940.97	7854.24
1301.13	4045.83	6891.93	6467.74	5886.88	7847.96
1303.13	4035.07	6841.38	6449.78	5813.2	7791.4
1305.13	4015.56	6783.81	6450.75	5727.08	7695.16
1307.13	3984.88	6725.74	6466.12	5641.89	7571.97
1309.13	3941.73	6678.42	6488.43	5577.58	7453.69
1311.13	3888.61	6654.52	6520.78	5525.71	7376.02
1313.12	3826.5	6640.76	6571.27	5494.87	7324.97
1315.12	3763.65	6640.17	6644.74	5478.95	7271.42
1317.12	3707.37	6653.17	6729.74	5474.8	7211.7
1319.12	3652.67	6661.75	6830.76	5471.7	7145.63
1321.12	3606.9	6660.41	6934.89	5474.02	7076.41
1323.12	3582.29	6654.76	7035.86	5492.47	7005.57
1325.12	3575.77	6645.35	7130.92	5536.4	6939.29
1327.12	3578.77	6630.83	7211.3	5610.48	6879.24
1329.11	3590.37	6608.45	7262.7	5682.16	6821.64
1331.11	3607.34	6580.35	7290.91	5754.68	6767.6
1333.11	3617.67	6544.27	7298.58	5834.17	6724.43
1335.11	3619.45	6497.48	7300.21	5916.86	6697.3
1337.11	3617.09	6437.42	7318.74	5984.56	6686.89
1339.11	3610.27	6366.16	7363.98	6044.93	6699.16
1341.11	3601.22	6285.13	7439.17	6088.49	6729.17
1343.1	3591.73	6206.88	7534.8	6111.79	6763.29
1345.1	3587.96	6135.87	7629.33	6110.87	6797.41
1347.1	3591.84	6064.97	7710.36	6093.63	6837.02
1349.1	3601.74	5997.02	7772.56	6060.11	6876.48
1351.1	3611.8	5927.12	7815.06	6011.17	6911.4
1353.1	3613.69	5843.98	7847.79	5951.36	6932.79
1355.1	3618.71	5748.34	7878.29	5881.8	6944.04
1357.1	3631.39	5641.03	7923.72	5802.19	6947.98
1359.09	3654.87	5531.87	7993.35	5718.74	6950.55
1361.09	3693.52	5427.5	8085.45	5636.62	6954.48
1363.09	3743.74	5334.79	8207.26	5570.55	6958.97
1365.09	3804.55	5246.51	8364.27	5534.38	6953.75
1367.09	3873.14	5164.66	8550.25	5518.9	6951.08
1369.09	3938.08	5082.86	8756.94	5505.95	6961.21
1371.09	3998.11	5004.25	8942.68	5495.54	6993.35
1373.08	4053.99	4939.45	9073.56	5490.21	7043.16
1375.08	4108.17	4895.81	9134.86	5488.4	7105.16
1377.08	4151.92	4872.89	9116.46	5492.45	7187.63
1379.08	4181.91	4866.34	9007.37	5504.94	7290.12
1381.08	4192.78	4872.76	8809.55	5522.4	7391.25
1383.08	4185.11	4887.73	8524.77	5542.19	7493.64
1385.08	4161.7	4904.74	8181.6	5557.11	7568.04
1387.08	4125.8	4926.61	7828.68	5577.08	7599.75
1389.07	4079.69	4946.99	7517.75	5606.61	7584.69
1391.07	4029.38	4956.6	7310.82	5649.65	7523.78
1393.07	3977.55	4963.86	7150.33	5694.2	7425.31
1395.07	3925.8	4970.24	7031.91	5733.72	7300.49
1397.07	3876.3	4969.27	6937.85	5763.73	7165.66
1399.07	3823.14	4950.95	6863.15	5788.19	7063.34
1401.07	3770.36	4917.18	6800.75	5818.09	7007.96
1403.06	3720.2	4870.24	6749.56	5857.07	6964.42
1405.06	3679.5	4814.98	6712.35	5904.02	6927.06
1407.06	3655.84	4752.94	6689.62	5957.3	6894.09
1409.06	3653.23	4694.88	6670.43	5999.45	6857.96
1411.06	3674.39	4643.04	6647.82	6029.76	6810.02
1413.06	3707.12	4598.13	6618.81	6051.51	6753.34
1415.06	3742.01	4558.86	6586.27	6080	6697.05
1417.06	3780.85	4522.67	6551.8	6113.42	6647.04
1419.05	3824.75	4492.33	6517.71	6145.43	6609.85
1421.05	3863.8	4471.79	6489.03	6170.36	6588.64
1423.05	3890.09	4466.15	6473.76	6192.88	6585.49
1425.05	3903.82	4467.2	6461.32	6217.69	6597.83
1427.05	3906.9	4473.82	6451.92	6240.58	6623.22
1429.05	3903.62	4480.48	6446.62	6260.88	6658.62
1431.05	3899.12	4493.34	6475.28	6288.56	6696.56
1433.04	3895.6	4516.33	6513.51	6333.29	6730.46
1435.04	3899.91	4548.77	6537.54	6392.94	6755.52
1437.04	3901.41	4587.78	6545.95	6463.53	6765.48
1439.04	3893.87	4635.42	6537.99	6518.32	6750.24
1441.04	3878.16	4691.69	6513.81	6533.75	6720.26
1443.04	3854.19	4756.78	6475.16	6502.96	6678.78
1445.04	3820.35	4826.11	6420.91	6439.99	6634.89
1447.04	3778.78	4887.31	6363.8	6352.5	6591.76
1449.03	3731.99	4931.36	6311.9	6248.76	6551.26
1451.03	3683.85	4958.64	6269.33	6146.99	6503.7
1453.03	3635.72	4967.63	6225.65	6056.92	6451.31
1455.03	3584.37	4956.4	6178.02	5973.4	6396.55
1457.03	3533.88	4921.93	6133.32	5902.69	6344.24
1459.03	3487.73	4858.27	6090.77	5859.06	6301.36
1461.03	3446.95	4764.19	6048.6	5849.4	6273.32
1463.02	3409.47	4648.77	6011.49	5864.71	6250.67
1465.02	3374.72	4517.58	5981.62	5899.18	6232.55
1467.02	3342.65	4389.66	5952.94	5951.65	6221.23
1469.02	3316.94	4262.93	5927.05	6016.88	6219.45
1471.02	3298.84	4152.07	5900.94	6074.05	6233.36
1473.02	3291.14	4057.64	5870.75	6121.32	6257.86
1475.02	3297.93	3980.6	5835.01	6161.69	6294.34
1477.02	3323.3	3916.26	5795.5	6197.96	6339.14
1479.01	3370	3869.54	5751.86	6231.03	6381.8
1481.01	3427.91	3845.91	5707.43	6253.83	6408.13
1483.01	3495.78	3852.75	5656.34	6267.3	6415.82
1485.01	3572.68	3886.15	5604.83	6279.09	6416.06
1487.01	3649.09	3949.29	5566.97	6294.84	6414.96
1489.01	3724.33	4027.56	5538.36	6318.21	6410.28
1491.01	3810.7	4110.38	5509.11	6349.63	6408.33
1493	3895.61	4192.75	5480.82	6394.62	6411.9
1495	3974.26	4277.93	5461.59	6455.9	6414.26
1497	4052.18	4364.25	5444.29	6533.64	6414.89
1499	4115.02	4450.92	5428.64	6603.53	6412.52
1501	4157.15	4537.02	5424.49	6644.7	6410.98
1503	4184.39	4617.89	5441.58	6647.79	6409.31
1505	4199.76	4686.98	5471.32	6612.64	6413.07
1507	4198.75	4745.13	5511.64	6547.41	6424.5
1508.99	4179.03	4787.82	5570.77	6449.12	6442.75
1510.99	4143.36	4808.8	5637.64	6317.49	6456.69
1512.99	4095.63	4807.71	5706.11	6162.83	6459.43
1514.99	4043.48	4788.75	5772.51	6009.01	6448.34
1516.99	3994.41	4751.88	5816.67	5888.93	6433.02
1518.99	3954.28	4698.69	5845.71	5841.01	6408.96
1520.99	3923.42	4632.77	5852.38	5879.06	6373.61
1522.98	3896.35	4555.98	5833.36	5981.78	6336.8
1524.98	3873.9	4469.69	5790.75	6094.35	6306.49
1526.98	3855.72	4377.27	5726.12	6211.44	6287.87
1528.98	3842.17	4287.16	5643.15	6321.17	6274.47
1530.98	3832.34	4207.48	5550.65	6422.41	6270.74
1532.98	3821.32	4144.82	5461.98	6519.46	6280.4
1534.98	3810.84	4110.42	5389.7	6603.97	6308.56
1536.98	3804.65	4099.64	5335.48	6685.34	6364.87
1538.97	3806.87	4116.22	5284.98	6762.27	6443.05
1540.97	3813.42	4139.38	5240.63	6844.96	6528.68
1542.97	3825.9	4165.54	5189.57	6937.95	6616.93
1544.97	3842.13	4192	5127.36	7047.57	6702.86
1546.97	3855.49	4217.04	5059.15	7179.81	6796.73
1548.97	3869.44	4233.52	4991.35	7323.84	6886.29
1550.97	3889.14	4242.13	4926.56	7469.79	6964.41
1552.96	3917.04	4246.57	4872.13	7601.99	7020.65
1554.96	3953.54	4254.18	4830.93	7701.13	7059.85
1556.96	3995.52	4269.4	4807.15	7730.98	7096.03
1558.96	4039.72	4287.41	4794.7	7680.76	7132.5
1560.96	4077.89	4308.48	4787.09	7569.16	7167.99
1562.96	4100.89	4340.98	4788.85	7413.07	7194.25
1564.96	4115.9	4388.1	4805.69	7223.59	7216.4
1566.96	4126.86	4437.06	4826.47	7056.94	7239.11
1568.95	4134.16	4475.98	4856.55	6964.64	7245.47
1570.95	4133.73	4499.54	4905.3	6898.26	7244.9
1572.95	4129.36	4512.19	4977.03	6857.79	7238.9
1574.95	4125.43	4516.13	5066.45	6828.32	7234.49
1576.95	4128.22	4514.59	5170.91	6791.81	7239.23
1578.95	4132.51	4507.74	5268.31	6752.63	7260.71
1580.95	4136.55	4497.44	5362.47	6705.7	7297.1
1582.94	4144.98	4487.68	5460.84	6651.56	7343.78
1584.94	4161.19	4488.11	5535.18	6591.82	7391.52
1586.94	4179.63	4501.34	5590.62	6529.89	7445.69
1588.94	4193.38	4520.02	5633.86	6468.55	7494.9
1590.94	4199.27	4535.79	5661.31	6407.81	7527.3
1592.94	4200.27	4542.84	5672.32	6360.23	7543.24
1594.94	4191.79	4541.32	5664.3	6325.61	7531.7
1596.94	4171.19	4534.04	5643.96	6299.86	7474.53
1598.93	4140.41	4524.44	5617.22	6288.78	7374.45
1600.93	4097.45	4516.4	5608.86	6296.88	7240.27
1602.93	4043.8	4516.17	5617.95	6304.7	7073.84
1604.93	3978.53	4527.81	5643.62	6308.69	6892.92
1606.93	3909.56	4542.72	5677.96	6306.84	6716.53
1608.93	3839.91	4557.8	5716.64	6307.09	6558.7
1610.93	3772.92	4568.66	5755.12	6312.19	6436.77
1612.92	3711.61	4580.5	5784.06	6319.91	6336.8
1614.92	3654.79	4595.3	5798.68	6327.3	6258.34
1616.92	3605.26	4616.63	5796.87	6340.86	6202
1618.92	3568.94	4641.2	5777	6360.45	6167.89
1620.92	3546.89	4662.59	5739.51	6388	6164.55
1622.92	3538.38	4683.53	5687.41	6426.93	6203.01
1624.92	3544.96	4705.4	5623.06	6479.35	6269.82
1626.92	3562.19	4728.38	5552.04	6544.31	6353.74
1628.91	3589.58	4742.9	5479.17	6606.7	6457.29
1630.91	3627.8	4746.43	5405.91	6650.68	6570.63
1632.91	3662.54	4738.3	5332.62	6669.09	6696.16
1634.91	3687.37	4715.35	5258.82	6666.11	6829.22
1636.91	3704.66	4672.66	5195.45	6653.26	6971.5
1638.91	3723.13	4613.32	5145.04	6629.53	7132.41
1640.91	3744.86	4540.55	5105.52	6599.73	7310.03
1642.9	3769.97	4462.77	5079.83	6576.21	7492.19
1644.9	3796.74	4391.14	5065.69	6552.66	7670.46
1646.9	3827.02	4334.82	5056.04	6525.02	7832.07
1648.9	3854.2	4292.23	5046.02	6490.65	7964.14
1650.9	3876.96	4260.93	5030.35	6453.2	8059.49
1652.9	3898.86	4228.7	5007	6419.43	8113.34
1654.9	3916.96	4196.04	4972.2	6389.03	8114.79
1656.9	3929.22	4168.9	4929.86	6352.23	8073.17
1658.89	3932.06	4151.54	4890.8	6311.91	7998.66
1660.89	3925.96	4155.03	4860.62	6269.01	7897.31
1662.89	3912.73	4184.58	4846.38	6228.48	7780.78
1664.89	3888.31	4222.34	4848.13	6197.38	7676.03
1666.89	3854.27	4265.4	4868.44	6183.52	7598.12
1668.89	3813.75	4311.16	4891.53	6178.8	7538.2
1670.89	3769.68	4345.39	4920.97	6172.74	7478.77
1672.88	3732.29	4369.61	4960.4	6165.72	7416.86
1674.88	3708.8	4387	5011.19	6164.16	7334.2
1676.88	3693.88	4400.79	5072.98	6170.52	7242.7
1678.88	3687.74	4414.69	5142.24	6191.59	7148.87
1680.88	3691.82	4431.84	5218.86	6235.92	7065.85
1682.88	3702.04	4454.94	5290.26	6294.77	7007.51
1684.88	3718.09	4482.84	5342.74	6357.5	6973.8
1686.88	3733.64	4504.68	5380.05	6424.54	6964.43
1688.87	3745.25	4515.48	5407.97	6487.08	6971.87
1690.87	3756.57	4518.99	5427.13	6545.79	6996.65
1692.87	3771.23	4516.55	5433.09	6596.16	7031.49
1694.87	3791.8	4508.04	5426.94	6634.7	7064.7
1696.87	3822	4495.35	5410.47	6668.67	7092.55
1698.87	3863.43	4482.14	5393.74	6692.87	7111.02
1700.87	3909.9	4470.85	5375.47	6711.01	7121.22
1702.86	3956.89	4464.52	5344.37	6728.75	7122.81
1704.86	3993.22	4469.7	5301.78	6752.96	7117.54
1706.86	4020.34	4482.52	5249.51	6787.5	7106.91
1708.86	4040.38	4492.14	5192.6	6817.21	7088.3
1710.86	4058.03	4499.19	5133.86	6845.95	7055.13
1712.86	4072.81	4504.08	5074.76	6880.78	7007.81
1714.86	4078.64	4506.87	5021.33	6925.31	6943.33
1716.86	4080.78	4509.48	4976.68	6970.05	6859.02
1718.85	4078.88	4513.28	4930.4	7000.71	6754.8
1720.85	4069.84	4509.82	4883.41	7022.29	6629.78
1722.85	4055.57	4496.08	4845.05	7039.79	6487.83
1724.85	4040.97	4474.35	4823.15	7053.53	6331.67
1726.85	4026.16	4446.84	4812.96	7063.11	6172.45
1728.85	4008.14	4414.92	4810.6	7069.97	6007.46
1730.85	3986.82	4381.63	4808.31	7057.99	5856.36
1732.84	3963.75	4344.16	4830.5	7034.97	5738.25
1734.84	3942.77	4302.52	4871.22	7006.44	5663.91
1736.84	3923.96	4263.25	4927.82	6977.96	5642.4
1738.84	3903.11	4221.25	4991.82	6958.72	5687.28
1740.84	3881	4173.97	5054.83	6941.18	5805.44
1742.84	3862.26	4124.49	5107.61	6920.4	5997.55
1744.84	3852.25	4073.6	5152.37	6900.7	6218.84
1746.84	3855.29	4019.82	5194.97	6880.41	6433.58
1748.83	3880.91	3962.95	5236.48	6853.1	6646.33
1750.83	3915.54	3905.87	5279.13	6822.36	6844.97
1752.83	3950.44	3852.06	5325.46	6787.15	7024.24
1754.83	3985.63	3813.13	5360.43	6742.87	7183.74
1756.83	4026.4	3802.42	5384.98	6694.45	7312.8
1758.83	4075.75	3819.95	5396.45	6646.43	7415.33
1760.83	4130.76	3856.19	5387.73	6599.04	7490.59
1762.82	4190.75	3907.5	5366.41	6559.67	7542.05
1764.82	4245.03	3966.47	5335.24	6537.04	7572.12
1766.82	4288.2	4018.43	5300.9	6536.67	7575.25
1768.82	4317.7	4060.85	5262.37	6550.57	7560.64
1770.82	4332.43	4094.02	5217.03	6571.84	7533.37
1772.82	4332.71	4115.84	5167.84	6593.17	7490.8
1774.82	4320.15	4126.71	5120.69	6612.34	7436.42
1776.82	4294.43	4129.55	5069.77	6628.13	7378.55
1778.81	4256.89	4128.98	5020.01	6632.67	7323.03
1780.81	4212.82	4133	4968.64	6636.73	7280.16
1782.81	4168.66	4144.13	4912.99	6644.59	7263.38
1784.81	4127.1	4167.71	4854.93	6654.75	7273.69
1786.81	4081.25	4208.47	4810.77	6651.46	7310.22
1788.81	4030.36	4248.19	4778.21	6642.02	7371.33
1790.81	3981.36	4285.45	4748.28	6625.81	7452.71
1792.8	3940.1	4323.22	4723.67	6607.94	7545.17
1794.8	3907.1	4361.32	4702.18	6591.71	7647.72
1796.8	3882.6	4396.2	4686.8	6580.9	7770.96
1798.8	3867.34	4421.96	4681.11	6568.09	7916.56
1800.8	3860.13	4437.59	4691	6546.86	8100.48
1802.8	3859.67	4445.82	4710.88	6511.97	8335.96
1804.8	3864.98	4450.95	4729.79	6469.11	8626.38
1806.8	3878.37	4457.41	4754.92	6422.23	8953.99
1808.79	3897.06	4461.06	4790.87	6375.17	9303.13
1810.79	3912.92	4461.52	4834.47	6333.94	9602.79
1812.79	3924.72	4461.21	4888.13	6302.5	9829.86
1814.79	3927.08	4463.91	4949.06	6286.58	9973.1
1816.79	3917.14	4472.78	5021.65	6287.76	10021.6
1818.79	3892.9	4487.29	5101.02	6300.94	9971.56
1820.79	3851.16	4511.52	5184.08	6323.8	9826.77
1822.78	3790.69	4539.77	5262.58	6357.5	9597.77
1824.78	3717.33	4561.9	5326.47	6397.08	9281.67
1826.78	3635.83	4574.43	5371.38	6433.96	8920.81
1828.78	3558.58	4569.79	5399.67	6469.47	8558.67
1830.78	3492.8	4549.57	5418.84	6511.63	8233.44
1832.78	3436.37	4514.91	5433.53	6559.15	8005.05
1834.78	3390.5	4467.52	5444.99	6608.22	7832.01
1836.78	3356.31	4406.29	5453.21	6652.04	7706.28
1838.77	3331.31	4333.56	5463.77	6674.44	7616.21
1840.77	3314.2	4257.67	5469.23	6676.98	7561.1
1842.77	3305.06	4190.18	5468.9	6666.09	7538.98
1844.77	3309.42	4146.95	5459.15	6648.5	7537.29
1846.77	3334	4131.55	5437.67	6628.55	7550.12
1848.77	3369.98	4131.2	5408.16	6611	7572.93
1850.77	3408.59	4149.49	5375.39	6590.73	7598.9
1852.76	3446.67	4181.14	5343.03	6570.79	7632.81
1854.76	3483.57	4221.74	5314.79	6556.48	7674.7
1856.76	3518.79	4269.05	5296.25	6557.49	7717.57
1858.76	3551.86	4311.64	5280.16	6568.91	7759.05
1860.76	3581.56	4352.04	5264.72	6580.96	7792.9
1862.76	3606.29	4390.8	5254.54	6582.09	7817.06
1864.76	3624.16	4427.74	5247.33	6580.69	7821.6
1866.76	3636.94	4460.03	5247.2	6576.11	7810.22
1868.75	3646.18	4489.91	5262.85	6570.66	7782.42
1870.75	3652.25	4522.98	5292.9	6564.69	7743.96
1872.75	3656.93	4563.28	5325.84	6556.97	7697.29
1874.75	3664.94	4613.87	5349.56	6546.33	7641.58
1876.75	3680.69	4663.2	5359.32	6513.13	7577.89
1878.75	3705.05	4706.1	5358.1	6455.84	7517.17
1880.75	3728.9	4734.59	5352.26	6376.9	7466.47
1882.74	3749.23	4753.63	5345.41	6281.42	7425.19
1884.74	3766.04	4765.41	5339.46	6175.98	7389.39
1886.74	3780.74	4770.03	5337.6	6076.55	7358.74
1888.74	3795.05	4769.81	5340.19	5983.24	7336.38
1890.74	3810.88	4761.12	5344.1	5915.44	7321.6
1892.74	3826.16	4741.07	5337.31	5877.89	7311.88
1894.74	3840.09	4710.61	5324.36	5869.05	7312.32
1896.74	3851.88	4672.81	5308.14	5882.08	7332.6
1898.73	3866.36	4629.07	5287.03	5912.9	7384.91
1900.73	3885.69	4577.83	5258.31	5946.43	7455.07
1902.73	3904.95	4519.85	5220.79	5985.01	7534.93
1904.73	3914.18	4463.31	5174.03	6028.43	7619.8
1906.73	3913.73	4411.26	5124.33	6067.74	7700.46
1908.73	3907.02	4361.63	5075.75	6105.64	7771.03
1910.73	3896.09	4318.32	5032.82	6143.68	7816.2
1912.72	3882.25	4287.86	4997.92	6178.11	7838.72
1914.72	3865.4	4273.61	4971.1	6201.36	7840.18
1916.72	3849.97	4270.61	4944.14	6222.9	7827.28
1918.72	3829.85	4284.33	4927.58	6246.54	7807.03
1920.72	3804.52	4321.07	4919.23	6274.36	7783.48
1922.72	3776.83	4383.95	4915.38	6305.63	7763.71
1924.72	3748.27	4465.12	4913.51	6341.08	7751.7
1926.72	3720.91	4558.35	4916.73	6385.07	7739.8
1928.71	3692.89	4653.92	4926.5	6437.95	7723.6
1930.71	3663.44	4740.42	4941.42	6497.46	7708
1932.71	3639.96	4809.91	4963.58	6557.69	7690.84
1934.71	3627.22	4863.85	4992.49	6622.15	7669.56
1936.71	3615.68	4901.67	5028.69	6678.98	7646.23
1938.71	3608.07	4920.47	5072.8	6727.49	7613.67
1940.71	3608.71	4918.82	5124.86	6767.4	7573.06
1942.7	3614.45	4901.31	5181.05	6801.59	7522.51
1944.7	3621.31	4872.39	5215.05	6828.22	7463.93
1946.7	3623.34	4836.91	5224.05	6844.86	7399.94
1948.7	3622.92	4801.35	5213.73	6855	7332.27
1950.7	3623.46	4775.44	5190.95	6860.86	7268.31
1952.7	3629.4	4770.16	5159.62	6864.19	7220.26
1954.7	3637.39	4776	5128.75	6864.74	7183.22
1956.7	3639.27	4780.33	5111.27	6846.44	7160.74
1958.69	3633.91	4779.85	5124.38	6806.37	7144.59
1960.69	3625.67	4773.75	5155.61	6751.41	7122.59
1962.69	3619.43	4763.84	5187.67	6684.71	7104.5
1964.69	3619.62	4751.13	5221.73	6609.97	7091.78
1966.69	3624.96	4734.43	5253.05	6530.65	7086.85
1968.69	3629.52	4708.71	5286.16	6457.31	7097.3
1970.69	3629.78	4675.5	5323.65	6389.77	7128.96
1972.68	3626.8	4640.57	5364.89	6324.74	7171.78
1974.68	3625.95	4611.87	5402.73	6268.74	7223.69
1976.68	3628.91	4587.79	5439.02	6225.31	7277.09
1978.68	3633.62	4563.73	5460.49	6194.27	7326.97
1980.68	3640.78	4546.6	5467.07	6188.12	7382.21
1982.68	3649.75	4538.22	5459.64	6211.6	7448.77
1984.68	3657.78	4526.96	5433.82	6266.39	7521.38
1986.68	3666.53	4511.9	5391.84	6332.91	7584.09
1988.67	3675.91	4496.04	5344.83	6397.57	7634.78
1990.67	3684.75	4478.81	5298.63	6463.91	7676.64
1992.67	3696.87	4459.97	5258.08	6528.86	7701.5
1994.67	3714.55	4443.54	5221.62	6586.55	7709.74
1996.67	3737.96	4433.87	5199.54	6633.91	7689.02
1998.67	3762.79	4438.89	5200.89	6671.85	7632.77
2000.67	3788.21	4457.92	5209.74	6707.62	7551.5
2002.66	3818.04	4474.26	5212	6751.96	7467.41
2004.66	3855.92	4482.66	5202.78	6809.69	7428.78
2006.66	3895.21	4487.48	5187.26	6884.21	7419.75
2008.66	3934.64	4491	5169.16	6968.69	7430.69
2010.66	3972.75	4486.59	5153.38	7039.32	7467.06
2012.66	4011.58	4472.01	5144.03	7104.48	7524.88
2014.66	4054.06	4448.43	5141.57	7168.69	7598.91
2016.66	4101.33	4418.52	5147	7225.85	7671.07
2018.65	4147.7	4385.93	5162.96	7280.25	7734.4
2020.65	4187.45	4355.83	5173.04	7309.65	7772.44
2022.65	4221.85	4332.27	5177.81	7306.51	7776.99
2024.65	4238.69	4325.69	5179.33	7275.63	7761.22
2026.65	4239.96	4327.27	5182.55	7224.44	7736.84
2028.65	4228.3	4333.84	5194.01	7157.92	7712.18
2030.65	4203.9	4345.19	5216.72	7083.74	7697.06
2032.64	4162.72	4363.67	5237.39	7010.35	7674.75
2034.64	4106.33	4391.77	5260.41	6953.29	7630.36
2036.64	4038.69	4428.8	5285.55	6911.87	7563.32
2038.64	3967.89	4473.81	5306.52	6868.61	7477.92
2040.64	3902.57	4527.49	5319.26	6829.88	7384.66
2042.64	3852.33	4581.19	5327.11	6795.22	7305.46
2044.64	3824.46	4621.58	5327.7	6757.36	7266.67
2046.64	3815.39	4649.42	5319.97	6717.29	7260.08
2048.63	3817.8	4668.94	5303.18	6674.07	7276.21
2050.63	3828.69	4683.33	5276.87	6623.53	7305.59
2052.63	3846.1	4693.39	5245.49	6564.96	7348.42
2054.63	3864.36	4700.53	5224.34	6501.15	7390.92
2056.63	3882.12	4705.68	5228.11	6427.91	7426.73
2058.63	3900.73	4707.28	5255.26	6343.71	7453.91
2060.63	3922.26	4705.28	5302.71	6253.87	7478.47
2062.62	3946.7	4701.82	5353.61	6163.72	7489.81
2064.62	3967.11	4701.47	5395.38	6090.91	7483.28
2066.62	3980.36	4706.23	5436.25	6032.77	7461.27
2068.62	3986.91	4719.56	5465.86	5992.15	7431.91
2070.62	3986.1	4730.35	5487.82	5965.48	7398.43
2072.62	3976.63	4736.37	5503.35	5941.99	7368.64
2074.62	3954.97	4734	5513.82	5928.12	7338.68
2076.62	3926.53	4718.26	5524.99	5923.14	7313.14
2078.61	3895.66	4690.27	5526.64	5918.61	7299.38
2080.61	3868.09	4654.38	5516.28	5920.98	7299.23
2082.61	3853.87	4616.88	5498.6	5931.16	7298.99
2084.61	3858.14	4586.13	5479.32	5940.99	7295.59
2086.61	3870.51	4571.62	5458.71	5937.82	7286.84
2088.61	3888.41	4572.35	5431.74	5918.49	7281.01
2090.61	3911.99	4582.82	5406.89	5885.17	7281.92
2092.6	3936.16	4598.75	5381.65	5846.26	7296.08
2094.6	3958.75	4613.49	5344.32	5805.58	7325.31
2096.6	3978.88	4627.64	5297.85	5773.88	7363.62
2098.6	3993.05	4644.02	5243.57	5753.24	7410.99
2100.6	3997.37	4655.43	5182.29	5732.36	7464.09
2102.6	3993.52	4659.77	5123.54	5700.41	7526.91
2104.6	3985.77	4653.48	5079.77	5662.53	7585.65
2106.6	3978.81	4634.91	5044.78	5620.23	7644.56
2108.59	3973.76	4601.57	5016.77	5567.14	7691.07
2110.59	3970.93	4550.66	5007.65	5507.06	7728.14
2112.59	3972.58	4484.3	5027.55	5445.47	7758.98
2114.59	3972.74	4404.29	5063.94	5390.62	7782.23
2116.59	3969.93	4316.5	5111.47	5359.21	7801.33
2118.59	3957.37	4228.9	5172.84	5344.06	7822.58
2120.59	3939.79	4140.9	5242.91	5344.86	7840.93
2122.58	3923.82	4057.41	5313.14	5362.23	7846.75
2124.58	3911.89	3992.79	5375.62	5393.5	7840.02
2126.58	3905.69	3943.36	5433.08	5429.82	7823.49
2128.58	3904.23	3919.03	5485.01	5476.07	7796.58
2130.58	3907.97	3919.88	5531.89	5525.55	7760.91
2132.58	3918.25	3936.07	5576.74	5578.52	7723.58
2134.58	3932.28	3969.62	5627.47	5633.93	7704.18
2136.58	3939.33	4020.24	5684.09	5689.99	7711.7
2138.57	3940.14	4078.18	5739.61	5744.33	7736.76
2140.57	3936.3	4137.45	5791.98	5792.03	7784.35
2142.57	3929.43	4200.52	5840.47	5847.22	7851.89
2144.57	3920.73	4272.98	5881.11	5919	7926.45
2146.57	3911.68	4358.55	5906.74	6008.27	8004.04
2148.57	3897.76	4455.91	5914.26	6103.88	8089.47
2150.57	3877.76	4548.78	5911.98	6207.67	8158.6
2152.56	3855.17	4626.16	5900.29	6311.93	8199.45
2154.56	3835	4691.62	5886.11	6406.92	8203.36
2156.56	3818.93	4746.13	5868.6	6497.88	8170.67
2158.56	3800.66	4791.44	5850.82	6567.41	8110.82
2160.56	3776.67	4822.76	5824.27	6609.34	8025.26
2162.56	3751.05	4836.3	5784.31	6629.36	7916.28
2164.56	3726.87	4834.54	5733.11	6631.16	7795.71
2166.56	3709.55	4820.63	5672.38	6614.73	7672.13
2168.55	3701.47	4797.43	5611.54	6584.73	7544.66
2170.55	3694.46	4766.9	5548.83	6545.57	7410
2172.55	3683.74	4734.25	5484.3	6500.16	7268.44
2174.55	3674.67	4712.81	5426.93	6461.5	7128.2
2176.55	3672.84	4696.19	5380.5	6439.02	6997.36
2178.55	3678.74	4677.43	5346.95	6430.21	6880.99
2180.55	3687.66	4657.57	5323.69	6420.65	6779.91
2182.54	3695.62	4638.18	5311.91	6412.49	6699.89
2184.54	3704.14	4615.95	5308.88	6414.44	6628.87
2186.54	3717.28	4595.25	5310.21	6431.75	6572.52
2188.54	3732.4	4577.58	5315.6	6460.33	6543.8
2190.54	3747.07	4568.82	5328.98	6494.61	6555.27
2192.54	3758.67	4568.69	5356.01	6523.41	6597.64
2194.54	3766.41	4568.35	5399.89	6545.56	6655.74
2196.54	3773.68	4559.28	5449.2	6560.24	6733.37
2198.53	3781.99	4543.95	5508.15	6560.38	6829.91
2200.53	3785.28	4523.89	5578.18	6555.84	6936.4
2202.53	3782.56	4500.19	5654.53	6537.79	7046.74
2204.53	3777.54	4474.91	5723.83	6513.81	7161.81
2206.53	3772.03	4454.12	5775.87	6486.78	7251.17
2208.53	3765.43	4435.58	5805.95	6464.15	7302.83
2210.53	3758.2	4406.92	5818.09	6454.96	7323.06
2212.52	3752.79	4369.64	5813.48	6438.72	7325.74
2214.52	3751.53	4324.36	5793.28	6417.02	7312.09
2216.52	3755.69	4271.1	5759.59	6395.53	7284.06
2218.52	3764.22	4211.51	5724.88	6377.04	7249.87
2220.52	3770.67	4151.56	5698.65	6363.49	7212.07
2222.52	3773.2	4104.58	5668.88	6359.68	7169.87
2224.52	3775.07	4067.63	5630.4	6352.2	7125.56
2226.52	3777.14	4036.66	5588.18	6337.73	7086.27
2228.51	3781.33	4014.63	5541.94	6320.84	7062.37
2230.51	3791.3	4006.68	5495.05	6304.01	7057.21
2232.51	3806.7	4014.19	5450.95	6283.23	7066.24
2234.51	3816.56	4037.45	5413.9	6258.63	7089.39
2236.51	3825.45	4072.73	5395.99	6233.66	7127.02
2238.51	3836.46	4112.87	5393.72	6208.38	7157.24
2240.51	3853.56	4156.04	5402.06	6183.77	7170.86
2242.5	3879.08	4193.87	5423.74	6162.64	7167.18
2244.5	3908.24	4226.65	5461.76	6150.45	7137.65
2246.5	3921.23	4256.61	5519.16	6146.74	7084.84
2248.5	3923.35	4279.86	5591.26	6137.86	7015.8
2250.5	3918.95	4291.86	5667.44	6119.77	6938.7
2252.5	3910.23	4294.67	5738.08	6091.06	6864.66
2254.5	3898.73	4289.24	5788.03	6055.2	6810.87
2256.5	3884.54	4273.97	5815.24	6015.73	6784
2258.49	3871.9	4247.2	5831.73	5979.54	6785.75
2260.49	3866.79	4205.55	5827.42	5944.51	6813.37
2262.49	3872.96	4150.28	5805.91	5902.36	6851.26
2264.49	3885.09	4084.6	5768.05	5853.99	6891.23
2266.49	3894.62	4020.14	5718.25	5807.6	6921.22
2268.49	3894.92	3960.98	5657.55	5773.93	6937.63
2270.49	3890.88	3899.9	5597.76	5755.15	6931.56
2272.49	3883.18	3839.56	5538	5742.57	6912.25
2274.48	3873	3785.96	5467.94	5739.55	6889.96
2276.48	3862.19	3748.13	5394.73	5747.28	6868.89
2278.48	3856.57	3723.21	5326.75	5751.48	6854.88
2280.48	3856.15	3713.34	5263.82	5760.48	6848.16
2282.48	3859.48	3725.69	5212.33	5778.64	6849.12
2284.48	3869.78	3762.6	5167.23	5810.68	6854.22
2286.48	3888.04	3810.33	5126.5	5862.53	6871.7
2288.47	3911.48	3870.5	5094.52	5915.78	6893.83
2290.47	3935.35	3942.37	5062.29	5968.27	6906.3
2292.47	3952.84	4023.68	5028.43	6008.49	6906.23
2294.47	3958.43	4113.01	4990.44	6038.71	6887.39
2296.47	3949.45	4199.8	4951.1	6070.24	6863.03
2298.47	3927.27	4282.72	4912.93	6099.13	6837.54
2300.47	3897.28	4356.23	4882.56	6130.04	6816.67
2302.47	3863.96	4416.45	4860.03	6166.26	6808.62
2304.46	3830.8	4463.38	4847.24	6204.55	6822
2306.46	3805.83	4499.51	4850.54	6229.59	6850.43
2308.46	3793.02	4528.59	4868.84	6232.02	6890.11
2310.46	3790.76	4554.25	4898.99	6214.56	6934.74
2312.46	3797.83	4577.77	4941.89	6182.63	6987.25
2314.46	3815.28	4602.3	4995.17	6140.74	7040.85
2316.46	3840.62	4628.14	5052.33	6093.42	7098.05
2318.45	3863.57	4654.95	5114.19	6043.36	7159.24
2320.45	3874.47	4681.49	5171.88	5995.12	7210.04
2322.45	3875.49	4706.9	5233.55	5947.68	7249.86
2324.45	3871.11	4727.09	5299.39	5909.18	7274.88
2326.45	3862.43	4734.47	5366.09	5876.33	7272.78
2328.45	3847.35	4728.15	5425.42	5856.92	7251.42
2330.45	3825.38	4709.99	5471.73	5849.18	7219.5
2332.45	3801.3	4682.81	5508.46	5837.95	7182.81
2334.44	3778.97	4647.7	5539.81	5821.85	7148.03
2336.44	3767.93	4610.16	5565.54	5805.17	7117.98
2338.44	3768.58	4576.37	5583.4	5787.86	7092.75
2340.44	3778.81	4538.46	5597.37	5770.32	7079.81
2342.44	3797.54	4493.38	5609.61	5751.75	7086.88
2344.44	3827.4	4445.2	5611.31	5735.1	7104.87
2346.44	3869	4400.46	5600.02	5726.07	7126.71
2348.43	3916.52	4364.43	5577.14	5714.96	7145.27
2350.43	3969.62	4337.44	5542.2	5708.34	7148.83
2352.43	4018.43	4319.9	5497.16	5713.89	7134.12
2354.43	4052.51	4309.58	5433.28	5733.67	7111.61
2356.43	4075.89	4304.48	5351.63	5769.62	7082.77
2358.43	4091.95	4303.98	5258.6	5829.63	7044.28
2360.43	4099.15	4306.68	5164.46	5922.4	6997.98
2362.43	4100.19	4304.08	5061.36	6031.87	6947.97
2364.42	4098.15	4298.87	4950.25	6148.61	6897.06
2366.42	4097.3	4289.1	4847.58	6263.87	6848.24
2368.42	4093.34	4271.41	4748.67	6358.42	6802.41
2370.42	4078.91	4243	4657.78	6433.64	6766.86
2372.42	4054.91	4204.26	4579.38	6485.7	6740.83
2374.42	4020.95	4155.42	4516.05	6518.89	6723.62
2376.42	3975.99	4102.41	4461.52	6530.58	6715.77
2378.41	3922.28	4044.95	4416.49	6535.48	6723.16
2380.41	3859.25	3982.49	4384.92	6536.14	6742.06
2382.41	3792.04	3923.57	4362.39	6538.08	6778.43
2384.41	3728.66	3871.78	4344.09	6541.2	6832.45
2386.41	3676.12	3828.43	4332.66	6552	6901.86
2388.41	3631.82	3799.7	4330.49	6573.81	6978.23
2390.41	3593.08	3780.87	4342.18	6604.63	7060.04
2392.41	3557.12	3769.48	4371.77	6618.86	7138.61
2394.4	3524.83	3765.56	4420.52	6625.11	7204.89
2396.4	3493.98	3768.79	4482.56	6618.91	7245.56
2398.4	3465.34	3779.06	4556.87	6596.78	7256.34
2400.4	3442.6	3797.22	4632.21	6550.45	7240.79
2402.4	3428.83	3827.31	4713.58	6486.13	7210.08
2404.4	3420.75	3864.5	4786.31	6406.96	7169.31
2406.4	3416.37	3905.18	4847.44	6319.47	7128.77
2408.39	3414.61	3948.38	4908.28	6242.28	7093.02
2410.39	3421.19	3998.77	4961.7	6182.68	7071.05
2412.39	3438.44	4049.67	5010.19	6128.33	7057.51
2414.39	3468.33	4098.08	5053.95	6070.02	7055.2
2416.39	3502.02	4144.51	5096.57	6012.23	7065.78
2418.39	3537.74	4190.9	5139.35	5957.87	7087.23
2420.39	3572.27	4239.67	5193.9	5910.39	7118.01
2422.39	3602.94	4284.69	5258.42	5873.21	7145.42
2424.38	3628.83	4321	5324.7	5845.99	7172.98
2426.38	3652.34	4346.97	5380.69	5830.81	7197.75
2428.38	3675.82	4356.84	5423.29	5829.29	7216.6
2430.38	3698.01	4348.62	5454.47	5838.79	7235.13
2432.38	3717.06	4324.73	5471.46	5854.35	7252.94
2434.38	3729.11	4289.24	5467.23	5875.79	7276.2
2436.38	3734.76	4246.02	5445.15	5890.5	7301.64
2438.37	3739.45	4202.72	5406.69	5896.58	7321.55
2440.37	3752.31	4158.42	5356.34	5904.47	7331.6
2442.37	3775.06	4120.28	5305.07	5903.05	7347.39
2444.37	3801.94	4089.45	5258.01	5899.93	7375.1
2446.37	3832	4059.59	5212.55	5903.22	7408.92
2448.37	3863.36	4027.36	5171.57	5912.48	7445.13
2450.37	3893.14	3995	5136.07	5934.15	7484.26
2452.37	3923.94	3968.87	5099.74	5963.32	7531.14
2454.36	3954.74	3944.54	5052.8	5981.2	7586.76
2456.36	3988.86	3924.2	4996.02	5990.44	7641.63
2458.36	4026.51	3910.05	4932.68	5991.05	7685.56
2460.36	4064.75	3904.52	4865.38	5986.37	7713.78
2462.36	4100.61	3907.83	4795.57	5983.73	7734.27
2464.36	4137.09	3908.36	4726.16	5986.96	7752.32
2466.36	4178.26	3910.57	4663.77	5993.07	7764.04
2468.35	4223.27	3919.63	4618.17	6003.57	7769.16
2470.35	4268.11	3938.35	4593.1	6018.9	7765.56
2472.35	4299.53	3965.56	4579.95	6041.48	7747.76
2474.35	4314.73	3991.65	4576.46	6077.79	7723.44
2476.35	4310.7	4011.06	4580.46	6133.67	7692.29
2478.35	4290.21	4021.3	4586.22	6203.24	7653.02
2480.35	4252.5	4021.11	4591.72	6270.6	7600.55
2482.35	4199.38	4011.65	4596.69	6335.35	7538.69
2484.34	4136.99	3998.69	4609.06	6387.23	7473.92
2486.34	4076.03	3982.19	4633.91	6422.1	7404.71
2488.34	4029.41	3963.41	4674.94	6440.74	7329.06
2490.34	3998.04	3943.17	4723.05	6442.51	7253.17
2492.34	3971.35	3930.6	4768.84	6425.16	7192.88
2494.34	3954.51	3930.06	4814.12	6392.02	7147.76
2496.34	3947.74	3936.16	4854.34	6347.95	7103.94
2498.33	3952.21	3946.99	4878.44	6300.5	7065.15
2500.33	3955.07	3962.28	4886.76	6252.65	7034.18
2502.33	3957.53	3978.93	4886.23	6200.89	7012.89
2504.33	3957.23	4000.77	4877.51	6145.45	6987.13
2506.33	3952.05	4030.29	4864.13	6094.74	6953.36
2508.33	3937.71	4066.92	4841.18	6050.63	6919.24
2510.33	3920.62	4101.16	4811.73	6015.91	6888.04
2512.33	3906.32	4130	4781.51	5985.84	6862.23
2514.32	3896.95	4155.49	4754.44	5964.35	6852.29
2516.32	3896.5	4180.4	4726.42	5953.77	6860.53
2518.32	3906.61	4201.91	4705.4	5945.81	6874.16
2520.32	3915.92	4217.94	4690.51	5941.32	6895.23
2522.32	3926.43	4229.16	4680.81	5938.2	6919.36
2524.32	3940.87	4226.39	4673.11	5928.97	6947.37
2526.32	3956.58	4211.47	4668.57	5912.59	6979.17
2528.31	3972.39	4186.07	4668.87	5887.8	7017.64
2530.31	3986.99	4153.01	4677.6	5855.73	7064.7
2532.31	4002.56	4114.21	4693.59	5822.56	7116.36
2534.31	4020.38	4073.34	4717.16	5793.66	7169.49
2536.31	4032.57	4038.45	4743.44	5776.02	7226.28
2538.31	4040.15	4002.58	4776.07	5777.14	7282.87
2540.31	4044.84	3960.26	4808.98	5795.94	7335.92
2542.31	4040.33	3912.75	4840.1	5816.65	7372.02
2544.3	4027.66	3860.92	4860.98	5839.46	7384.25
2546.3	4011.31	3786.99	4872.58	5865.11	7379.46
2548.3	3994.46	3691.08	4883.61	5893.46	7368.48
2550.3	3978.22	3561.63	4898.25	5920.29	7350.92
2552.3	3964.01	3385.44	4921.7	5949.24	7328.17
2554.3	3950.71	3140.44	4953.44	5974.72	7311.79
2556.3	3939.2	2816.49	4992.62	5991.31	7306.8
2558.29	3931.48	2413.3	5027.5	6002.33	7323.67
2560.29	3927.88	1943.72	5057.01	6017.19	7353.85
2562.29	3921.15	1442.01	5083.41	6037.89	7388.27
2564.29	3908.66	993.418	5108.5	6054.43	7417.76
2566.29	3885.52	768.831	5134.02	6060.61	7441.43
2568.29	3850.63	485.571	5156.61	6060.38	7454.08
2570.29	3805.48	305.912	5172.73	6059.24	7460.28
2572.29	3750.9	161.718	5180.21	6058.37	7459.91
2574.28	3690.33	66.02	5175.67	6056.99	7460.71
2576.28	3630.85	6.80491	5160.14	6050.8	7463.07
2578.28	3576.88	0	5132.65	6036.26	7468.46
2580.28	3523.5	58.1443	5095.85	6018.93	7478.86
2582.28	3469.8	191.668	5054.13	6004.67	7488.54
2584.28	3419	417.682	5006.33	5993.94	7493.28
2586.28	3372.58	742.198	4955.44	5972.23	7495.92
2588.27	3337.8	1165.58	4904.75	5938.7	7491.93
2590.27	3320.25	1678.05	4850.7	5901.99	7492.48
2592.27	3316.59	2176.84	4796.71	5865.74	7503.03
2594.27	3330.41	2542.1	4744.45	5838.41	7517.9
2596.27	3355.38	2867.11	4696.55	5822.47	7533.43
2598.27	3387.93	3116.89	4652.89	5805.92	7549.22
2600.27	3431.12	3293.44	4614.5	5797.44	7559.51
2602.27	3485.26	3413.01	4581.04	5801.04	7560.77
2604.26	3549	3506.1	4551.15	5824.34	7545.56
2606.26	3615.1	3568.84	4525.75	5854.42	7517.67
2608.26	3679.14	3622.77	4509.01	5888.94	7486.2
2610.26	3734.98	3670.32	4500.31	5930.68	7456.33
2612.26	3779.85	3715.79	4502.35	5965.77	7439.28
2614.26	3813.22	3762.08	4511.71	5990.58	7436.27
2616.26	3833.22	3812.46	4522.62	6007.25	7438.45
2618.25	3839.32	3861.09	4534.82	6010.57	7441.05
2620.25	3831.53	3905.03	4554.09	5985.3	7441.74
2622.25	3813.28	3939.67	4582.36	5941.27	7439.62
2624.25	3788.75	3961.1	4619.83	5885.25	7428.66
2626.25	3761.77	3971.02	4668.85	5823.87	7408.1
2628.25	3732.59	3975.36	4720.83	5768.35	7380.49
2630.25	3701.31	3978.23	4776.63	5729.69	7334.39
2632.25	3665.82	3980.79	4829.73	5712.35	7284.81
2634.24	3626.88	3979.57	4883.55	5707.79	7238.17
2636.24	3584.66	3975.36	4942.02	5718.45	7205.51
2638.24	3540.44	3973.57	4999.96	5742.26	7184.6
2640.24	3504.6	3983.29	5046.72	5768.56	7167.31
2642.24	3473.59	4003.95	5085.32	5798.77	7153.69
2644.24	3445.18	4031.45	5116.14	5832.1	7135.16
2646.24	3422.29	4064.48	5134.81	5876.68	7106.52
2648.23	3408.07	4099.42	5151.34	5928.88	7073.16
2650.23	3406.54	4135.54	5166.03	5988.11	7031.77
2652.23	3414.32	4171.88	5179.45	6049.34	6982.26
2654.23	3425.25	4203.04	5194.72	6104.86	6932.62
2656.23	3443.44	4222.74	5203.28	6161.25	6892.52
2658.23	3469.93	4232.77	5191.89	6226.57	6869.68
2660.23	3503.2	4236.21	5163.94	6293.67	6872.21
2662.23	3526.08	4225.75	5127.55	6337.39	6897.14
2664.22	3535.14	4200.84	5086.87	6364.08	6938.8
2666.22	3534.94	4160.25	5049.28	6371.74	6991.26
2668.22	3529.05	4108.22	5016.63	6364.74	7056.83
2670.22	3520.45	4053.1	4987.81	6350.05	7130.09
2672.22	3513.24	3994.47	4958.7	6329.27	7205.85
2674.22	3511.01	3930.41	4923.43	6301.76	7274.53
2676.22	3513.69	3873.64	4885.1	6267.96	7331.79
2678.21	3514.84	3829.29	4847.19	6230.52	7366.56
2680.21	3512.54	3800.9	4811.32	6189.67	7384.47
2682.21	3511.39	3790.46	4775.51	6145.44	7399.37
2684.21	3516.15	3795.83	4746.14	6105.82	7414.35
2686.21	3525.81	3812.9	4727.09	6074.71	7431.59
2688.21	3540.61	3839.22	4717.71	6050.63	7455.38
2690.21	3560.61	3874	4711.82	6042.6	7483.02
2692.21	3583.28	3917.55	4712.11	6047.97	7510.51
2694.2	3609.46	3962.56	4720.19	6056.67	7534.45
2696.2	3637.15	3999.7	4737.61	6067.44	7556.18
2698.2	3665.65	4030.59	4756.78	6089.42	7576.25
2700.2	3697.88	4057.71	4775.16	6122.42	7585.33
2702.2	3730.54	4075.45	4794.09	6168.02	7581.91
2704.2	3757.95	4081.24	4806.97	6218.24	7569.56
2706.2	3775.37	4080.46	4814.43	6264.89	7553.29
2708.19	3780.44	4073.71	4814.76	6303.59	7537.65
2710.19	3776.47	4066.39	4806.45	6343.46	7527.92
2712.19	3765.19	4066.95	4790.24	6382.83	7521.65
2714.19	3748.15	4067.5	4768.22	6421.4	7516.14
2716.19	3726.49	4064.28	4742.18	6468.31	7513.96
2718.19	3704.7	4068.46	4716.45	6523.89	7511.77
2720.19	3682.64	4083.22	4689.96	6585.01	7512.53
2722.19	3652.53	4100.56	4662.13	6638.95	7508.55
2724.18	3616.03	4114.01	4631.95	6688.59	7504.59
2726.18	3582.16	4122.17	4594.96	6722.38	7502.83
2728.18	3557.49	4129.32	4554.19	6739.22	7500.37
2730.18	3549.17	4140.74	4513.06	6743.53	7498.54
2732.18	3556.22	4151.85	4476.11	6735.12	7502.43
2734.18	3573.08	4153.29	4441.95	6711.25	7512.33
2736.18	3593.67	4147.07	4413.86	6671.95	7516.32
2738.17	3607.41	4131.94	4390.47	6621.09	7508.51
2740.17	3616.69	4111.25	4373.55	6565.4	7500.01
2742.17	3623.34	4088.48	4363.46	6505.16	7490.23
2744.17	3623.6	4065.69	4362.35	6447.71	7473.92
2746.17	3618.05	4045.98	4363.3	6396.87	7448.58
2748.17	3606.4	4026.71	4367.37	6350.55	7417.62
2750.17	3588.86	4012.02	4375.26	6312.24	7383.96
2752.17	3565.6	4007.68	4385.09	6278.88	7353.76
2754.16	3535.88	4012.91	4392.47	6251.63	7327.11
2756.16	3500.81	4018.6	4403.22	6232.09	7302.05
2758.16	3466.71	4026.06	4422.54	6216.1	7275.44
2760.16	3438.22	4035.49	4451.13	6200.68	7244.4
2762.16	3417.52	4042.7	4484.19	6191.46	7202.98
2764.16	3403.53	4048.25	4522.21	6191.42	7159.87
2766.16	3395.21	4049.96	4562.73	6201.15	7118.15
2768.15	3389.73	4045.75	4604.75	6216.78	7087.96
2770.15	3381.43	4034.95	4643.6	6240.31	7064.91
2772.15	3369.95	4019.01	4684.46	6266.49	7048.17
2774.15	3357.84	3996.95	4732.07	6304.33	7034.47
2776.15	3340.78	3966.46	4779.73	6339.22	7024.39
2778.15	3316.93	3927.29	4827.75	6364.75	7022.7
2780.15	3290.79	3884.31	4871.41	6380.64	7034.16
2782.15	3263.33	3836.84	4911	6392.79	7053.89
2784.14	3240.37	3780.56	4948.99	6393.97	7079.2
2786.14	3221.21	3714.76	4977.55	6381.81	7107.02
2788.14	3210.04	3644.75	4989.18	6359.41	7140.46
2790.14	3208.56	3576.31	4993.45	6331.52	7177.93
2792.14	3216.06	3510.2	4994.45	6301.18	7216.86
2794.14	3228.17	3450.61	4993.53	6271.36	7250.57
2796.14	3244.28	3403.29	4988.78	6245.42	7278.94
2798.13	3263.4	3371.24	4980.6	6212.34	7302.83
2800.13	3288.84	3353.64	4972.11	6179.31	7316.41
2802.13	3319.03	3353.97	4965.73	6146.88	7335.17
2804.13	3350.96	3372.52	4961.3	6115.54	7362.91
2806.13	3380.13	3408.2	4956.53	6089.54	7404.93
2808.13	3407.35	3454.86	4951.51	6073.53	7463.56
2810.13	3434.06	3507.66	4946.68	6067.81	7535.71
2812.13	3459.77	3567.32	4940.28	6077.26	7615.03
2814.12	3485.06	3635.29	4928.62	6095.05	7693.2
2816.12	3510.85	3710.61	4913.72	6111.03	7761.31
2818.12	3535.71	3789.58	4897.84	6119.63	7811.72
2820.12	3559.4	3867.24	4879.84	6114.8	7847.03
2822.12	3580.58	3941.04	4856.14	6101.66	7863.6
2824.12	3596.73	4007.83	4827.5	6077.07	7860.23
2826.12	3608.7	4060.02	4796.23	6049.42	7837.16
2828.11	3618.61	4100.11	4761.89	6023.75	7797.62
2830.11	3629.16	4129.8	4724.73	6004.92	7747.56
2832.11	3640.97	4151.58	4683.69	6000.55	7690.45
2834.11	3650.76	4164.09	4638.8	6000.62	7649.92
2836.11	3653.29	4172.86	4589.81	5993.97	7631.74
2838.11	3647.61	4182.31	4536.43	5986.01	7636.32
2840.11	3632.28	4190.9	4481.17	5967.63	7651.8
2842.11	3608.76	4195.57	4428.74	5937.17	7664.75
2844.1	3579.27	4193.12	4388.56	5903.34	7673.31
2846.1	3550.19	4181.14	4361.79	5869.44	7681.68
2848.1	3529.76	4163.38	4347.19	5838.75	7688.31
2850.1	3523.74	4143.63	4345.15	5812.69	7699.6
2852.1	3524.6	4119.9	4354.4	5795.78	7715.43
2854.1	3532.89	4091.45	4366.93	5795.38	7730.98
2856.1	3548.81	4060.6	4380.78	5812.72	7735.61
2858.09	3568.33	4029.46	4390.96	5844.41	7740.57
2860.09	3587.86	3998	4392.55	5879.63	7744.3
2862.09	3606.84	3969.51	4397.25	5915.05	7752.15
2864.09	3623.93	3944.83	4405.47	5941.73	7764.78
2866.09	3634.98	3920.37	4414.67	5950.86	7779.68
2868.09	3638.96	3894.1	4422.47	5949.34	7797.22
2870.09	3636.1	3864.95	4433.9	5940.41	7824.18
2872.09	3626.25	3833.39	4451.98	5928.24	7863.19
2874.08	3612.52	3799.27	4477.86	5916.66	7906.02
2876.08	3595.2	3760.71	4510	5906.72	7953.7
2878.08	3575.83	3720.37	4548.39	5896.64	7999.59
2880.08	3556.45	3681.14	4596.88	5886.25	8035.05
2882.08	3538.91	3645.92	4654.51	5874.9	8049.57
2884.08	3524.71	3615.34	4714.53	5865.17	8044.78
2886.08	3517.37	3598.96	4772.07	5856.51	8028.63
2888.07	3521.56	3598.82	4826.99	5840.02	8004.6
2890.07	3537.43	3613.37	4882.36	5811.84	7979.2
2892.07	3557.58	3640.85	4932.71	5780.05	7955.84
2894.07	3575.67	3679.07	4972.59	5746.56	7947.36
2896.07	3589.47	3725.59	5006.67	5713.3	7963.24
2898.07	3595.2	3773.18	5036.5	5685.16	7995.71
2900.07	3593.37	3815.67	5060.53	5656.43	8026.45
2902.07	3585.99	3847.72	5079.96	5630.49	8062.82
2904.06	3575.56	3868.62	5098.77	5612.2	8084.61
2906.06	3562.64	3879.05	5120.92	5609.29	8095.89
2908.06	3548.93	3881.44	5144.38	5622.67	8099.3
2910.06	3534.26	3878.47	5164.57	5639.76	8090.4
2912.06	3519.17	3867.58	5176.93	5655.8	8071.73
2914.06	3504.77	3854.17	5181.17	5674.31	8041.55
2916.06	3493.54	3846.69	5178.45	5696.45	7996.93
2918.05	3484.39	3848.64	5168.04	5716.4	7932.88
2920.05	3475.92	3857.4	5153.3	5732.45	7858.03
2922.05	3467.74	3869.54	5136.68	5748.89	7776.35
2924.05	3461.24	3881.23	5116.79	5758.7	7697.85
2926.05	3455.1	3888.19	5094.15	5760.83	7631.94
2928.05	3448.16	3891.67	5076.55	5762.14	7598.83
2930.05	3441.89	3890.76	5064.18	5761.98	7581.31
2932.05	3440.7	3887.22	5050.07	5763.7	7571.62
2934.04	3445.67	3877.09	5027.6	5769.67	7560.86
2936.04	3451.39	3859.53	4996.44	5781.85	7544.36
2938.04	3453.98	3834.2	4959.19	5798.57	7531.11
2940.04	3454.18	3804.12	4918.66	5818.46	7518.04
2942.04	3452.19	3771.95	4877.28	5838.16	7495.4
2944.04	3448.73	3741.17	4840.1	5860.75	7465.46
2946.04	3443.29	3715.67	4810.62	5886.1	7431.78
2948.03	3439.99	3695.45	4791.35	5912.93	7392.07
2950.03	3442.37	3680.97	4780.72	5934.2	7341.44
2952.03	3454.69	3672.33	4777.99	5953.55	7280.68
2954.03	3478.16	3669.42	4777.4	5977.26	7213.83
2956.03	3508.1	3674.79	4777.43	6004.23	7150.18
2958.03	3542.66	3684.67	4778.71	6025.19	7096.73
2960.03	3584.14	3693.59	4779.93	6040.11	7049.85
2962.03	3631.87	3703.82	4785.05	6051.7	6996.17
2964.02	3679.77	3711.29	4794.32	6061.28	6935.52
2966.02	3722.41	3715.11	4807.24	6072.03	6872.98
2968.02	3754.6	3715.33	4825.53	6091.31	6820.69
2970.02	3771.43	3707.96	4849.35	6101.89	6797.2
2972.02	3776.11	3692.24	4877.52	6102.8	6789.69
2974.02	3770.16	3671	4902.45	6102.69	6797.81
2976.02	3751.96	3648.1	4917.95	6098.19	6818.47
2978.01	3720.81	3627.56	4920.6	6079.34	6848.76
2980.01	3678.36	3609	4916.65	6054.64	6884.89
2982.01	3627.27	3594.32	4908.75	6027.16	6926.4
2984.01	3569.31	3592.08	4895.69	6004.78	6968.49
2986.01	3508.83	3605.46	4875.63	5990.59	6998.34
2988.01	3445.76	3629.47	4843.34	5977.72	7016.62
2990.01	3386.04	3659.85	4800.78	5967.07	7033.55
2992.01	3337.49	3691.62	4750.02	5952.66	7052.09
2994	3305.27	3722.47	4698.54	5937.66	7074.49
2996	3290.22	3754.47	4652.37	5922.44	7093.28
2998	3291.24	3785	4611.92	5906.42	7098.72
3000	3300.62	3810.95	4579.21	5889.94	7092.26
3002	3312.36	3829.59	4562.91	5868.9	7084.97
3004	3320.51	3844.24	4561.37	5846.59	7075.97
3006	3322.36	3855.99	4570.97	5829.8	7058.45
3007.99	3316.48	3861.39	4581.79	5825.14	7034.4
3009.99	3297.93	3861.83	4599.48	5831.8	7009
3011.99	3268.24	3857.31	4627.4	5838.63	6988.95
3013.99	3228.87	3849	4665.62	5840.33	6980.56
3015.99	3181.61	3840.35	4708.63	5840.88	6994.56
3017.99	3128.97	3832.29	4753.57	5844.94	7015.68
3019.99	3079.26	3824.59	4800.35	5858.06	7050.04
3021.99	3036.23	3818.05	4845.51	5874.14	7092.39
3023.98	3007.94	3811.93	4885.65	5894.44	7139.24
3025.98	3000.42	3807.99	4917.79	5921.99	7189.99
3027.98	3009.11	3804.69	4943.33	5953.4	7246.84
3029.98	3028.83	3801.53	4956.92	5983.35	7305.43
3031.98	3057.83	3796.23	4965.56	6007.6	7365.02
3033.98	3090.86	3788.6	4972.92	6013.38	7417.29
3035.98	3125.5	3777.72	4982.29	6007.07	7458.77
3037.97	3157.83	3761.78	4987.38	5996.77	7495.39
3039.97	3185.44	3739.42	4989.35	5983.5	7522.48
3041.97	3204.1	3711.34	4989.3	5968.44	7540.45
3043.97	3217.3	3678.17	4991.72	5938.4	7554.87
3045.97	3227.93	3642.1	4998.61	5903.25	7572.7
3047.97	3236.65	3605.5	5009.36	5866.84	7599.28
3049.97	3243.58	3568.68	5021.91	5832.05	7634.42
3051.97	3250.29	3530.64	5033.96	5800.97	7662.42
3053.96	3258.5	3493.09	5040.87	5770.67	7697.1
3055.96	3271.47	3459.71	5043.56	5738.61	7736.26
3057.96	3289.69	3432.66	5039.01	5705.42	7776.1
3059.96	3311.51	3415.67	5027.64	5672.66	7796.85
3061.96	3334.14	3405.77	5009.09	5641.46	7808.71
3063.96	3359.08	3404.06	4980.5	5612.94	7819.11
3065.96	3388.67	3409.64	4941.19	5589.54	7830.01
3067.95	3419.45	3427.43	4895.16	5571.04	7831.26
3069.95	3450.45	3459.62	4843.78	5563.15	7834.28
3071.95	3478.12	3506.08	4795.22	5569.67	7838.9
3073.95	3497.69	3562.67	4746.94	5592.27	7846.57
3075.95	3506.8	3624.27	4694.94	5625.58	7845.77
3077.95	3509.68	3688.11	4637.66	5662.07	7843
3079.95	3508.72	3755.71	4577.73	5694.61	7843.33
3081.95	3510.35	3823.32	4517.73	5723.27	7845.6
3083.94	3514.42	3887.3	4466.53	5747.69	7840.04
3085.94	3514.74	3942.96	4423.79	5771.93	7831.11
3087.94	3510.72	3991.84	4393.79	5794.03	7805.04
3089.94	3504.91	4032.19	4382.39	5808.78	7764.55
3091.94	3497.95	4061.81	4392.97	5824.43	7716.19
3093.94	3491.14	4082.39	4421.46	5841.75	7666.05
3095.94	3482.83	4096.11	4465.07	5851.92	7619.36
3097.93	3472.76	4101.31	4519.81	5853.34	7584
3099.93	3462	4099.81	4580.47	5850.64	7575.08
3101.93	3454.2	4091.83	4642.06	5843.7	7584.45
3103.93	3448.86	4075.82	4701.62	5830.41	7609.49
3105.93	3444.16	4052.62	4761.87	5811.92	7628.67
3107.93	3439.86	4022.84	4813.13	5790.11	7641.37
3109.93	3436.7	3983.57	4863.81	5766.57	7652.23
3111.93	3434.39	3933.01	4909.36	5743.04	7665.38
3113.92	3434.25	3874.29	4953.87	5720.14	7679.37
3115.92	3437.49	3813.32	4992.4	5691.07	7689.49
3117.92	3446.19	3749.14	5023.46	5659.35	7680.56
3119.92	3463.5	3682.43	5046.36	5628.91	7652.82
3121.92	3493.24	3614.32	5062.95	5596.29	7616.61
3123.92	3530.2	3547.17	5077.54	5556.5	7576.01
3125.92	3570.45	3484.11	5092.64	5515.13	7537.81
3127.91	3617.43	3427.41	5106.63	5479.96	7510.04
3129.91	3666.35	3379.25	5122.71	5461.22	7485.53
3131.91	3710.84	3338.88	5138.93	5452.3	7462.91
3133.91	3748.11	3310.85	5158.01	5450.76	7438.61
3135.91	3777.01	3294.31	5180.19	5459.4	7417.79
3137.91	3798.96	3288.7	5201.3	5474.22	7401.66
3139.91	3816.09	3289.43	5221.09	5492.2	7389.75
3141.91	3826.73	3291.07	5239.5	5511.51	7381.99
3143.9	3828.09	3290.84	5256.37	5542.91	7379.1
3145.9	3819.66	3291.01	5272.73	5584.05	7365.83
3147.9	3803.16	3291.35	5288.07	5629.03	7333.86
3149.9	3780	3293.21	5299.17	5676.99	7286.31
3151.9	3757.64	3297.34	5300.77	5726.07	7229.34
3153.9	3734.9	3302.79	5291.74	5773.29	7161.35
3155.9	3709.84	3305.52	5256.22	5819.27	7083.48
3157.89	3679.84	3309.1	5178.16	5864.65	7000.82
3159.89	3640.74	3317.44	5044.59	5901.27	6917.54
3161.89	3592.82	3330.42	4836.89	5936.27	6843.1
3163.89	3537.8	3350.26	4536.2	5976.72	6794.1
3165.89	3479.09	3377.55	4126.77	6013.83	6768.25
3167.89	3420.52	3411.48	3599.69	6045.74	6759.63
3169.89	3365.33	3452.11	2969.68	6070.35	6765.03
3171.89	3312.14	3500.97	2279.63	6097.77	6775.21
3173.88	3265.37	3556.77	1612.54	6124.4	6787.2
3175.88	3225.54	3615.44	1206.98	6154.3	6798.83
3177.88	3192.69	3673.63	946.811	6181.36	6816.17
3179.88	3165.73	3727.83	732.904	6206.89	6835.95
3181.88	3144.21	3778.06	546.771	6230.51	6862.72
3183.88	3127.72	3824.16	392.734	6238.35	6888.4
3185.88	3121.24	3865.22	264.986	6232.57	6917.33
3187.87	3124.13	3900.74	160.363	6204.89	6952.5
3189.87	3133.22	3925.18	79.1565	6163.68	6987.41
3191.87	3144.97	3936.9	24.0164	6110.25	7011.55
3193.87	3158.63	3941.28	0	6055.21	7038.72
3195.87	3170.14	3939.6	15.6651	6007.81	7073.79
3197.87	3176.78	3932.11	81.4975	5968.59	7112.39
3199.87	3180.63	3920.34	214.082	5935.29	7151.95
3201.87	3182.83	3906.07	427.871	5902.68	7194.24
3203.86	3183.86	3892.1	735.256	5873.61	7240.13
3205.86	3185.81	3880.49	1143.26	5845.38	7291.8
3207.86	3188.33	3874.88	1648.79	5823.83	7344.48
3209.86	3194	3872.08	2200.91	5809.57	7391.53
3211.86	3204.63	3870.15	2664.62	5797.02	7433.64
3213.86	3222.38	3865.5	3038.72	5789.02	7476.31
3215.86	3247.07	3859.77	3340.65	5778.85	7521.67
3217.85	3277.09	3854.72	3574.47	5764.79	7574.78
3219.85	3309.39	3850.87	3755.08	5738.51	7639.27
3221.85	3343.68	3849.69	3899.91	5693.76	7710.61
3223.85	3380.74	3852.28	4017.69	5638.33	7786.75
3225.85	3419.13	3857.19	4115.79	5573.14	7862.76
3227.85	3456.37	3862.69	4198.41	5503.38	7930.29
3229.85	3487.28	3868.25	4271.4	5437.25	7976.29
3231.85	3512.05	3872.03	4335.32	5377.82	8000.08
3233.84	3532.97	3871.89	4394.49	5328.15	7999.97
3235.84	3549.61	3868.39	4449.33	5303.22	7980.69
3237.84	3559.7	3861.47	4501.94	5309.4	7943.38
3239.84	3563.33	3846.8	4554.64	5339.18	7894.54
3241.84	3560.38	3823.05	4609.54	5386.91	7839.24
3243.84	3552.6	3791.38	4666.08	5444.54	7779.64
3245.84	3540.77	3750.2	4720.79	5514.11	7721.42
3247.83	3527.48	3699.13	4772.76	5587.74	7681.14
3249.83	3514.49	3646.2	4820.5	5658.2	7662.48
3251.83	3501.37	3601.62	4865.96	5722.77	7661.75
3253.83	3490.48	3568.6	4910.36	5772.33	7668.35
3255.83	3485.71	3551.41	4950.7	5804	7678.09
3257.83	3487.49	3553.98	4985.42	5811.44	7681.51
3259.83	3493.42	3574.56	5016.01	5791.95	7676.15
3261.83	3502.54	3609.04	5041.24	5751.04	7664.93
3263.82	3512.15	3650.85	5059.04	5697.39	7646.84
3265.82	3522.09	3694.85	5067.8	5635.34	7628.38
3267.82	3532.79	3737.78	5068.67	5581.27	7612.64
3269.82	3541.48	3778.17	5061.33	5536.99	7598.53
3271.82	3545.84	3813.93	5047.2	5500.1	7591.4
3273.82	3543.9	3841.43	5024.14	5463.09	7592.97
3275.82	3537.82	3863.02	4990.2	5428.78	7606.73
3277.81	3525.12	3881.73	4947.22	5397.79	7634.99
3279.81	3502.11	3900.37	4897.49	5372.38	7677.4
3281.81	3465.15	3917.15	4843.3	5352.01	7729.76
3283.81	3408.78	3927.77	4788.99	5333.87	7788.41
3285.81	3325.52	3931.59	4734.33	5310.08	7844.38
3287.81	3215.56	3928.51	4684.43	5290.6	7900.16
3289.81	3064.12	3917.3	4637.25	5279.96	7961.44
3291.81	2857.67	3897.73	4599.14	5282.78	8013.93
3293.8	2593.1	3872.14	4572.2	5294.68	8067.42
3295.8	2268.59	3841.71	4556.92	5309.53	8121.35
3297.8	1893.25	3802.84	4547.15	5334.89	8181.17
3299.8	1509.99	3754.87	4545.27	5362.86	8230.49
3301.8	1149.19	3700.57	4550.76	5393.98	8268.17
3303.8	820.972	3643.69	4559.49	5429.64	8288.41
3305.8	619.103	3591.36	4574.34	5458.98	8300.25
3307.79	478.38	3544.62	4595.47	5484.57	8298.53
3309.79	359.644	3504.09	4626.52	5512.33	8276.07
3311.79	258.698	3476.43	4661.58	5544.2	8235.15
3313.79	173.575	3459.42	4697.11	5583.16	8183.7
3315.79	105.642	3449.6	4736.01	5628.81	8123.87
3317.79	49.6719	3443.81	4772.41	5671.95	8060.58
3319.79	11.1687	3440.88	4809.07	5709.5	7994.47
3321.79	0	3436.78	4843.18	5742.22	7935.93
3323.78	17.0023	3432.1	4872.62	5767.43	7895.45
3325.78	74.8609	3430.24	4906.16	5792.52	7856.84
3327.78	185.376	3432.27	4936.8	5821.06	7811.54
3329.78	361.395	3436.98	4958.74	5856.62	7762.73
3331.78	615.3	3442.93	4974.55	5894.14	7719.87
3333.78	951.501	3445.64	4978.71	5933.05	7689.35
3335.78	1366.34	3447.12	4967.17	5965.89	7677.92
3337.77	1842.97	3446.86	4948.01	5996.79	7689.78
3339.77	2249.49	3444.48	4923.8	6033.95	7714.79
3341.77	2492.19	3442.47	4904.79	6074.52	7744.72
3343.77	2688.28	3444.9	4890.77	6125.29	7780.24
3345.77	2845.04	3451.56	4879.11	6177.53	7829.46
3347.77	2971.68	3461.43	4870.42	6224.87	7873.89
3349.77	3075.22	3474.59	4863.71	6260.19	7908.32
3351.77	3154.84	3487.5	4861.18	6290.8	7935.75
3353.76	3214.62	3499.27	4865.77	6307.09	7959.79
3355.76	3253.28	3509.82	4875.04	6307.02	7970.78
3357.76	3269.93	3519.05	4891.32	6294.26	7966.34
3359.76	3268.27	3525.48	4915.05	6265.2	7955.91
3361.76	3254.62	3527.43	4945.23	6220.4	7937.02
3363.76	3234.23	3528.07	4978.86	6166.1	7905.71
3365.76	3210.24	3530.28	5011.72	6110.91	7860.15
3367.75	3181.44	3535.13	5042.75	6056.39	7807.65
3369.75	3150.65	3544.69	5074.56	6008.11	7750.37
3371.75	3126.92	3561.26	5102.35	5961.55	7699.27
3373.75	3114.76	3583.38	5119.12	5908.03	7662.58
3375.75	3116.87	3609.52	5123.08	5849.02	7638.08
3377.75	3133.81	3639.41	5118.92	5787.9	7620.79
3379.75	3161.09	3671.73	5106.61	5729.24	7609.35
3381.75	3191.29	3705.21	5083.35	5680.48	7603.69
3383.74	3224.12	3736.47	5053.68	5640.26	7599.58
3385.74	3252.44	3764.32	5023.11	5607.26	7602.88
3387.74	3276.85	3788.31	4995.06	5584.64	7605.39
3389.74	3301.53	3806.56	4964.63	5579.1	7610.21
3391.74	3328.09	3817.49	4932.46	5577.61	7606.83
3393.74	3356.59	3823.79	4902.25	5578.27	7597.64
3395.74	3389.46	3825.67	4874.2	5575.4	7591.23
3397.73	3425.13	3820.28	4849.08	5564.24	7584.92
3399.73	3461.98	3804.96	4828.78	5555.32	7575.7
3401.73	3496.41	3781.98	4814.1	5552.93	7569.95
3403.73	3526.57	3752.13	4802.26	5562.98	7568.26
3405.73	3547.1	3715.63	4791.54	5583.17	7574.95
3407.73	3556.07	3676.06	4782.01	5614.14	7588.05
3409.73	3551.18	3636.17	4774.07	5653.45	7607.02
3411.73	3531.78	3597.16	4767.41	5691.59	7625.6
3413.72	3499.86	3562.32	4758.73	5721.9	7625.13
3415.72	3458.2	3534.74	4751.94	5744.95	7609.69
3417.72	3413.31	3512.97	4751.06	5766.95	7582.12
3419.72	3367.84	3496.78	4757.31	5784.86	7544.78
3421.72	3325.2	3484.94	4764.17	5802.7	7500.77
3423.72	3288.31	3478.64	4771.45	5822.34	7452.43
3425.72	3254.43	3474.84	4771.23	5839.13	7402.58
3427.71	3221.4	3474.14	4769.89	5857.21	7358.51
3429.71	3191.17	3472.71	4769.76	5864.98	7333.86
3431.71	3163.52	3471	4772.76	5859.78	7322.9
3433.71	3139.32	3470.27	4781.56	5848.86	7306.14
3435.71	3124.23	3471.62	4797.18	5826.01	7275.8
3437.71	3122.18	3474.22	4817.91	5794.98	7246.26
3439.71	3137.6	3472.67	4838.73	5759.68	7220.78
3441.71	3173.6	3464.13	4852.73	5723.87	7206.44
3443.7	3230.51	3453.08	4859.56	5693.92	7200.67
3445.7	3302.4	3447.83	4859.07	5667.74	7205.79
3447.7	3381.42	3447.19	4851.95	5638	7227.79
3449.7	3466.05	3447.2	4841.71	5608.77	7269.71
3451.7	3552.58	3448.37	4829.96	5581.86	7325.25
3453.7	3639.81	3452.87	4815.52	5560.23	7401.78
3455.7	3724.12	3464.48	4800.01	5542.78	7497.89
3457.69	3803.01	3481.12	4782.91	5529.2	7609.03
3459.69	3876.95	3501.07	4761.87	5521.91	7727.91
3461.69	3945.11	3519.12	4739.26	5522.79	7840.31
3463.69	4003.82	3534.27	4714.25	5521.02	7934.96
3465.69	4048.47	3547.44	4688.83	5512.29	8008
3467.69	4081.82	3559.75	4664.82	5499.21	8057.39
3469.69	4106.64	3571.95	4646.55	5480.68	8086.9
3471.69	4121.55	3584.64	4636.91	5455.82	8101
3473.68	4125.95	3598.4	4633.68	5433.6	8109.33
3475.68	4115.49	3611.57	4635.72	5416.1	8116.98
3477.68	4089.76	3621.89	4641.63	5413.09	8128.89
3479.68	4049.4	3630.32	4644.68	5416.78	8146.48
3481.68	3996.33	3635.23	4645.68	5417.95	8153.08
3483.68	3931.5	3633.59	4650.49	5419.66	8153.77
3485.68	3861.52	3627.9	4662.42	5421.97	8148.62
3487.67	3788	3620.36	4682.87	5431.22	8144.71
3489.67	3712.37	3610.86	4709.19	5450.15	8148.03
3491.67	3636.83	3601.25	4742.02	5477.67	8164.97
3493.67	3562.26	3590.89	4781.72	5508.94	8183.57
3495.67	3492.85	3577.54	4820.63	5542.31	8202.45
3497.67	3434.26	3557.85	4858.9	5577.85	8206.77
3499.67	3385.72	3535.95	4895.28	5608.62	8192.81
3501.67	3347.59	3517.88	4931.39	5631.89	8161.11
3503.66	3321.2	3508.33	4965.77	5653.95	8108.81
3505.66	3307.88	3511.59	4997.25	5672.94	8035.39
3507.66	3302.49	3527.74	5025.58	5689.14	7948.29
3509.66	3298.28	3554.7	5049.87	5702.55	7850.61
3511.66	3299.97	3584.77	5074.17	5707.42	7752.41
3513.66	3310.45	3614.98	5096.85	5697.48	7667.42
3515.66	3327.85	3645.98	5118.07	5677.67	7591.83
3517.65	3347.4	3676.41	5132.38	5648.95	7519.8
3519.65	3362.48	3704.41	5137.71	5616.74	7449.7
3521.65	3372.84	3729.83	5130.82	5584.15	7383.69
3523.65	3380.52	3751.12	5119.95	5555.5	7325.51
3525.65	3387.53	3766.89	5106.21	5531.69	7286.84
3527.65	3396.74	3776.46	5091.61	5511.74	7273.7
3529.65	3410.19	3782.63	5079.86	5492.89	7275.42
3531.65	3426.68	3785.99	5073.04	5477.64	7287.63
3533.64	3443.89	3785.93	5072.6	5466.58	7301.52
3535.64	3458.48	3780.58	5082.68	5457.63	7318.05
3537.64	3470.43	3769.16	5101.65	5445.34	7329.63
3539.64	3483.12	3749.06	5123.85	5436.96	7333.1
3541.64	3499.57	3723.75	5142.15	5432.46	7328.47
3543.64	3524.59	3696.41	5157.21	5430.06	7314.49
3545.64	3557.68	3669.6	5162.71	5425.14	7298.53
3547.63	3595.34	3645.65	5143.61	5418	7281.69
3549.63	3634.93	3625.23	5105.65	5410.08	7263.5
3551.63	3672.51	3611.42	5054.76	5401.64	7248.38
3553.63	3704.29	3606.08	4994.61	5392.99	7233.83
3555.63	3730.17	3609.66	4934.83	5380.38	7222.42
3557.63	3753.09	3620.12	4882.27	5366.78	7223.56
3559.63	3774	3636.03	4838.63	5351.37	7238.49
3561.63	3794.06	3653.95	4802.38	5332.52	7264.34
3563.62	3811.64	3671.23	4770.45	5316.43	7290.96
3565.62	3821.7	3687.82	4747.88	5304.66	7310.84
3567.62	3821.73	3703.61	4735.67	5298.02	7336.84
3569.62	3810.54	3714.53	4730.25	5293.34	7377.45
3571.62	3791.22	3718.61	4730.52	5295.75	7424.89
3573.62	3767.47	3714.1	4732.5	5309.16	7474.43
3575.62	3740.99	3703.2	4732.23	5334.31	7529.14
3577.61	3713.01	3689.31	4729.68	5361.57	7581.5
3579.61	3685.63	3673.71	4728.22	5387.46	7625.49
3581.61	3658.76	3657.33	4729.81	5413.26	7659.11
3583.61	3633.94	3643.15	4729.74	5440.45	7686.97
3585.61	3609.17	3633.13	4726.88	5474.39	7705.01
3587.61	3586.76	3630.28	4723.19	5516.93	7710.41
3589.61	3568.08	3636.8	4721.5	5570.68	7713.33
3591.61	3552.02	3654.33	4718.14	5629.59	7714.67
3593.6	3536.78	3681.94	4714.23	5691.18	7720.67
3595.6	3524.77	3716.52	4707.85	5750.67	7720.59
3597.6	3520.14	3753.42	4696.44	5810.45	7710.01
3599.6	3521.06	3787.17	4680.45	5866.6	7688.75
3601.6	3526.97	3817.21	4665.44	5921.12	7661.16
3603.6	3537.87	3845.15	4648.89	5972.91	7630.83
3605.6	3551.89	3869.1	4632.65	6015.86	7597.11
3607.59	3567.71	3881.3	4619.35	6042.96	7566.56
3609.59	3585.02	3884.16	4613.94	6051.85	7540.35
3611.59	3605.02	3880.06	4616.78	6049.64	7516.61
3613.59	3628.01	3868.79	4631.07	6043.96	7494.23
3615.59	3654.33	3854.47	4656.88	6036.03	7474.11
3617.59	3679.63	3835.19	4694.29	6027.68	7459.05
3619.59	3701.45	3813.04	4746.75	6021.96	7451.66
3621.59	3717.54	3790.15	4815.04	6025.98	7455.59
3623.58	3725.13	3770.77	4897.97	6044.32	7462.14
3625.58	3722.78	3757.51	4984.6	6065.41	7460.82
3627.58	3710.37	3751.51	5073.36	6090.98	7453.02
3629.58	3687.67	3753.75	5156.65	6112.81	7442.97
3631.58	3655.76	3762.36	5231.88	6127.44	7429.93
3633.58	3618.48	3775.38	5299.33	6142.82	7421.37
3635.58	3581.22	3790.89	5350.77	6157.12	7417.02
3637.57	3548.37	3806.87	5383.18	6160.58	7416
3639.57	3525.29	3820.32	5401.16	6160.79	7403.72
3641.57	3510.15	3832.46	5401.3	6155.96	7387.66
3643.57	3500.09	3838.87	5385.65	6141.68	7369.48
3645.57	3493.71	3836.35	5356.37	6113.57	7357.9
3647.57	3492.66	3825.13	5316.56	6080.01	7354.06
3649.57	3500.2	3807.35	5270.31	6045.89	7363.01
3651.57	3505.57	3789.81	5216.3	6017.96	7366.98
3653.56	3505.61	3774.99	5162.14	5997.53	7366.28
3655.56	3501.76	3765.47	5106.87	5983.09	7375.75
3657.56	3491.62	3762.66	5046.08	5973.85	7397.76
3659.56	3473.92	3764.29	4982.63	5967.47	7419.42
3661.56	3446.87	3772.06	4921.4	5959.07	7447.11
3663.56	3411.2	3781.14	4867.17	5948.56	7475.15
3665.56	3368.85	3789.41	4822.64	5936.58	7495.62
3667.55	3325.47	3796.8	4786.26	5927.6	7507.67
3669.55	3288.08	3799.39	4756.84	5917.45	7517.63
3671.55	3260.79	3798.12	4736.84	5908.72	7527.94
3673.55	3245.8	3791.26	4723.69	5899.07	7527.01
3675.55	3244.86	3781.71	4713.54	5889.34	7517.82
3677.55	3261.75	3765.68	4708.3	5884.34	7513.93
3679.55	3286.93	3744.65	4705.88	5887.81	7518.48
3681.55	3309.82	3718.81	4706.58	5899.9	7529.49
3683.54	3326.1	3694	4710.24	5918.8	7542.87
3685.54	3338.63	3669.4	4714.52	5936.42	7554.9
3687.54	3345.36	3651.32	4717.57	5947.27	7567.54
3689.54	3345.76	3639.37	4717.7	5959.88	7580.32
3691.54	3338.79	3632.05	4715.8	5976.19	7599.11
3693.54	3323.09	3626.47	4714.01	5986.9	7624.03
3695.54	3298.85	3621.37	4711.05	5990.42	7651.11
3697.53	3269.98	3616.34	4705.7	5994.72	7684.56
3699.53	3238.06	3612.87	4699.9	6000.47	7713.91
3701.53	3203.1	3616.66	4692.28	6009.05	7718.32
3703.53	3164	3628.53	4680.47	6019.46	7699.38
3705.53	3120.71	3645.52	4665.22	6031.03	7664.42
3707.53	3077.9	3665.53	4644.32	6040.46	7616.81
3709.53	3036.99	3686.79	4618.69	6047.54	7562.58
3711.53	3002.19	3708.78	4592.2	6048.12	7512.25
3713.52	2975.94	3726.8	4567.63	6043.2	7476.97
3715.52	2961.22	3739.99	4546.72	6036.51	7443.3
3717.52	2958.79	3748.07	4529.42	6025.79	7417.63
3719.52	2966.67	3750.14	4513.19	6008.3	7406.51
3721.52	2984.03	3745.5	4499.8	5988.53	7416.97
3723.52	3013.53	3736.95	4489.89	5968.27	7438.39
3725.52	3054.02	3728.51	4485.93	5948.69	7463.46
3727.51	3101.63	3717.5	4487.5	5928.4	7495.21
3729.51	3151.95	3707.47	4496.73	5904.31	7527.08
3731.51	3202.98	3697.28	4516.74	5879.12	7554.35
3733.51	3253.87	3684.27	4543.49	5857.55	7563.22
3735.51	3303.2	3671.48	4569.14	5843.86	7563.49
3737.51	3348.55	3660.65	4597.8	5839.25	7560.31
3739.51	3388.69	3652.31	4628.92	5838.67	7558.76
3741.51	3420.32	3647.3	4664.18	5844.46	7560.91
3743.5	3442.04	3650.26	4702.93	5857.78	7571.73
3745.5	3451.62	3664.11	4741.39	5874.47	7586.9
3747.5	3445.32	3687.86	4773.14	5887.36	7610.14
3749.5	3422.36	3717.31	4797.49	5898.42	7642.78
3751.5	3384.28	3747.83	4812.83	5903.36	7664.57
3753.5	3332.36	3776.74	4816.36	5907.31	7677.08
3755.5	3272.55	3797.7	4814.07	5904.95	7687.9
3757.5	3213.77	3809.63	4807.74	5899.43	7697.76
3759.49	3159.2	3815.96	4801.33	5893.88	7705.35
3761.49	3115.91	3812.95	4795.91	5895.61	7714.68
3763.49	3090.51	3801.46	4794.56	5901.58	7732.14
3765.49	3083.48	3792.39	4793	5907.28	7766.45
3767.49	3091.98	3789.26	4794.06	5913.54	7805.87
3769.49	3110.89	3795.16	4798.5	5913.32	7859.88
3771.49	3136.5	3808.5	4800.69	5910.35	7921.05
3773.48	3160.9	3825.4	4801.65	5900.66	7976.52
3775.48	3182.47	3841.4	4798.52	5888.24	8022.74
3777.48	3202.09	3854.28	4790.34	5881.2	8048.93
3779.48	3222.84	3865.4	4775.99	5884.34	8064.75
3781.48	3246.95	3876.87	4754.34	5898.16	8070.34
3783.48	3276.84	3887.34	4727.72	5908.34	8054.51
3785.48	3312.24	3897.67	4697.34	5921.48	8020.22
3787.48	3351.74	3907.17	4667.51	5931.65	7978.15
3789.47	3396.81	3916.58	4641.55	5945.87	7931.61
3791.47	3448.2	3926.04	4622.07	5960.41	7883.82
3793.47	3499.15	3935.82	4612.28	5973.26	7836.65
3795.47	3546.62	3945.11	4611.22	5987.79	7796.34
3797.47	3589.29	3954.57	4617.24	6000.36	7763.39
3799.47	3623.15	3966.63	4630.62	6007.97	7739.29
3801.47	3649.23	3979.85	4652.61	6005.84	7722.89
3803.46	3668.49	3991.49	4686.19	5989.89	7718.14
3805.46	3680.61	4002.08	4730.05	5962.55	7722.67
3807.46	3685.67	4009.7	4781.03	5925.96	7724.82
3809.46	3680.97	4012.45	4837.26	5885.2	7722.87
3811.46	3667.28	4014.47	4892.25	5843.46	7727.47
3813.46	3646.75	4019.88	4948.47	5809.74	7741.51
3815.46	3619.91	4022.83	5001.09	5781.93	7769.68
3817.46	3588.76	4031.59	5053.05	5756.38	7808.47
3819.45	3555.1	4044.28	5105.01	5727.8	7850.95
3821.45	3520.65	4060.26	5154.39	5693.44	7887.52
3823.45	3489.84	4080.91	5200.15	5661.25	7926.38
3825.45	3462.89	4106.2	5241.28	5634.07	7972.46
3827.45	3440.11	4132.87	5275.74	5612.77	8015.92
3829.45	3423.1	4161.1	5302.97	5599.03	8060.97
3831.45	3411.25	4188.33	5321.5	5595.88	8103.91
3833.44	3407.13	4210.86	5328.39	5603.29	8148.75
3835.44	3410.34	4226.09	5324.29	5620.3	8198.76
3837.44	3415.72	4231.43	5306.33	5646.95	8250.41
3839.44	3420.51	4225.02	5276.24	5683.05	8307.2
3841.44	3424.1	4203.13	5237.16	5720.6	8361.03
3843.44	3422.32	4164.91	5190.45	5754.61	8406.34
3845.44	3415.45	4117.59	5137.17	5777.31	8440.5
3847.44	3404.68	4064.8	5079.3	5789.09	8463.4
3849.43	3391.52	4012.9	5022	5802.88	8471.98
3851.43	3378.71	3966.92	4966.77	5814.75	8476.36
3853.43	3367.29	3930.23	4914.65	5820.64	8472.77
3855.43	3358.86	3898.27	4863.82	5827.53	8466.15
3857.43	3358.76	3871.12	4816.67	5837.89	8461.58
3859.43	3365.09	3847.47	4770.97	5852.07	8460.81
3861.43	3377.13	3826.55	4728.58	5861.1	8460.95
3863.42	3393.16	3812.44	4687.93	5867.18	8463.49
3865.42	3408.72	3805.78	4653.13	5873.1	8468.65
3867.42	3419.39	3807.62	4625.65	5883.08	8479.78
3869.42	3424.49	3817.36	4605.93	5893.1	8486.02
3871.42	3422.19	3831.78	4595.89	5901.25	8481.94
3873.42	3411.07	3848.82	4593.67	5908.83	8465.24
3875.42	3393.21	3866.76	4598.76	5911.14	8434.55
3877.42	3371.2	3884.62	4609.15	5905.77	8390.95
3879.41	3346.77	3904.75	4623.32	5900.89	8336.6
3881.41	3322.81	3925.96	4638.52	5896.3	8272.56
3883.41	3302.41	3941.09	4654.73	5891.78	8200.04
3885.41	3284.25	3947.9	4667.87	5892.55	8123.39
3887.41	3268.22	3946.62	4686.8	5898.86	8048.6
3889.41	3253.56	3938.01	4712.78	5908.92	7982.39
3891.41	3241.31	3926.41	4743.96	5926.98	7931.6
3893.4	3230.81	3921.74	4774.29	5948.46	7888.96
3895.4	3220.87	3922.71	4799.79	5974.93	7854.13
3897.4	3211.29	3930.71	4819.14	6002.26	7823.61
3899.4	3201.84	3946.41	4835.5	6033.5	7804.77
3901.4	3192.19	3969.05	4847.88	6066.26	7797.11
3903.4	3186.45	3995.5	4855.9	6103.94	7795.67
3905.4	3188.37	4024.31	4860.63	6140.05	7791.71
3907.4	3201.3	4053.07	4863.81	6177.13	7777.86
3909.39	3220.83	4080.56	4863.4	6213.08	7767.28
3911.39	3241.89	4102.45	4861.83	6246.19	7764.84
3913.39	3261.54	4116.83	4859.02	6271.16	7774.29
3915.39	3278.47	4123.26	4851.01	6287.35	7793.58
3917.39	3294.02	4119.63	4837.65	6293.95	7822.19
3919.39	3309.26	4106.93	4822.38	6291.8	7851.79
3921.39	3321.46	4082.38	4806.34	6279.52	7872
3923.38	3328.13	4050.58	4789.65	6258.52	7891.41
3925.38	3328.53	4020.28	4772.69	6232.62	7917.56
3927.38	3325.46	3988.47	4754.01	6206.03	7947.86
3929.38	3324.31	3953.85	4735.37	6181.63	7970.23
3931.38	3329.75	3915.77	4714.55	6161.26	7979.77
3933.38	3338.93	3871.72	4691.31	6142.17	7990.72
3935.38	3351.22	3822.37	4666.09	6119.12	8003.84
3937.38	3368.17	3773.97	4642.1	6089.65	8020.59
3939.37	3384.21	3737.48	4620.39	6053.91	8035.4
3941.37	3398.65	3712.05	4605.18	6015.34	8049.62
3943.37	3414.8	3699.26	4596.6	5967.87	8061.46
3945.37	3434.67	3695.72	4597.02	5916.81	8080.57
3947.37	3457.4	3703.35	4601.57	5863.14	8103.61
3949.37	3481.67	3720.29	4606.45	5811.69	8132.69
3951.37	3505.11	3740.27	4608.94	5761.11	8156.16
3953.36	3526.58	3758.52	4613	5718.12	8176.49
3955.36	3543.27	3771.64	4614.93	5682.71	8200.98
3957.36	3555.08	3779.71	4615.36	5655.36	8226.46
3959.36	3562.5	3786.95	4615.86	5638.53	8244.23
3961.36	3565.63	3791.43	4617.84	5633.75	8264.97
3963.36	3564.13	3788.1	4619.17	5638.22	8291.85
3965.36	3559.84	3776.03	4621.94	5645.78	8316.85
3967.36	3555.81	3756.07	4629.06	5657.91	8333.42
3969.35	3555.55	3730.02	4641.22	5669.99	8336.58
3971.35	3559.07	3700.12	4654.55	5676.79	8333.93
3973.35	3568.14	3668.71	4671.06	5681.68	8329.71
3975.35	3583.53	3641.84	4685.59	5687.54	8330.79
3977.35	3602.98	3616.97	4701.73	5694.39	8342.4
3979.35	3622.67	3590.94	4716.09	5700.93	8367.72
3981.35	3640.01	3566.38	4725.68	5703.72	8394.89
3983.34	3652.74	3544.57	4728.85	5702.28	8423.41
3985.34	3659.4	3525.61	4726.45	5697.66	8454.96
3987.34	3660.01	3506.56	4723.54	5689.38	8490.79
3989.34	3654.38	3488.17	4720.88	5681.94	8534.9
[truncated: 1,004 more rows]
