# Supplementary material for: Ionogel thin films as a compatibilizing pretreatment for electrospray deposition
Source: Royal Society of Chemistry journal article supplement (doi:10.1039/d5lp00359h), 2026-01-01
Supplement: d5lp00359h1.zip [file Film Thickness Data.xlsx]

## Sheet: Ionogel Film Thickness
Sample	0.10	0.11	0.12	0.26	0.70	2.15	2.62
	μm	μm	μm	μm	μm	μm	μm
	0.0945	0.1175	0.1165	0.2525	0.7155	2.211	2.9125
	0.099	0.1205	0.1115	0.2675	0.6765	2.477	2.236
	0.105	0.121	0.1255	0.2505	0.6405	2.0795	3.371
	0.104	0.119	0.113	0.282	0.562	1.6985	2.356
	0.099	0.105	0.1265	0.2525	0.6145	2.484	2.9095
	0.0945	0.108	0.19	0.33	0.7155	2.615	2.8405
	0.103	0.113	0.1115	0.228	0.7455	1.1515	2.077
	0.1045	0.1025	0.148	0.2725	0.745	0.831	2.3995
