# Supplementary material for: Ionogel thin films as a compatibilizing pretreatment for electrospray deposition
Source: Royal Society of Chemistry journal article supplement (doi:10.1039/d5lp00359h), 2026-01-01
Supplement: d5lp00359h1.zip [file FTIR - Post-Heat Absorbance.xlsx]

## Sheet: v2 - Post-Rinse FTIR
Wavelength	Al2O3 only	IG	PS only	PS on IG
cm^-1
	Absorbance	Absorbance	Absorbance	Absorbance
399.675	0	0	0	0
400.157	0.277954	0.00170497	0.0440277	-0.103831
400.639	0.279084	-0.00695445	0.0427101	-0.0961607
401.121	0.279779	-0.0164797	0.0427137	-0.0908355
401.603	0.277868	-0.0249195	0.0439708	-0.0861273
402.085	0.272552	-0.0310998	0.0461075	-0.0812452
402.567	0.264943	-0.0348376	0.0485155	-0.0764568
403.05	0.257526	-0.0368202	0.0505869	-0.0726586
403.532	0.252517	-0.03794	0.0519615	-0.0705635
404.014	0.251142	-0.0387768	0.0525054	-0.0703278
404.496	0.253156	-0.0393048	0.052343	-0.0713205
404.978	0.257142	-0.0389954	0.0517463	-0.0723922
405.46	0.260931	-0.0371189	0.0511559	-0.0722245
405.942	0.262772	-0.0333213	0.0509945	-0.0700893
406.424	0.262247	-0.027976	0.0515117	-0.066302
406.906	0.260299	-0.0220664	0.0526997	-0.0621116
407.389	0.258346	-0.0166267	0.054358	-0.0589426
407.871	0.257306	-0.0122815	0.0562104	-0.0577187
408.353	0.25721	-0.00912694	0.0579728	-0.0585894
408.835	0.25724	-0.00679543	0.0593985	-0.0609082
409.317	0.25627	-0.00472506	0.0603054	-0.0635645
409.799	0.253582	-0.00245043	0.0605986	-0.0654235
410.281	0.249461	0.000112438	0.0603146	-0.0659133
410.764	0.245001	0.00265925	0.0595809	-0.065163
411.246	0.241417	0.00469379	0.0585524	-0.0637494
411.728	0.239332	0.00583325	0.0573511	-0.0622172
412.21	0.238627	0.00594812	0.0560587	-0.0607997
412.692	0.238586	0.00522527	0.0547531	-0.0593758
413.174	0.238381	0.00406627	0.0535209	-0.0576646
413.656	0.237552	0.00292623	0.0524447	-0.055523
414.138	0.236328	0.0021026	0.0515714	-0.0531441
414.62	0.23541	0.00162718	0.0508617	-0.0509805
415.103	0.235552	0.00135155	0.0502085	-0.0495511
415.585	0.237085	0.0010869	0.0494534	-0.0492127
416.067	0.239763	0.000709316	0.0484243	-0.0500676
416.549	0.242669	0.00022527	0.0469555	-0.0519259
417.031	0.244443	-0.000234989	0.0449729	-0.0543099
417.513	0.243895	-0.000481667	0.0425761	-0.0565489
417.995	0.240758	-0.000374618	0.0401596	-0.0578953
418.477	0.236206	5.60333e-05	0.0383161	-0.0578897
418.959	0.232045	0.000630302	0.0375356	-0.0565234
419.442	0.229501	0.00116403	0.037947	-0.0540892
419.924	0.228443	0.00160346	0.039294	-0.0508849
420.406	0.227872	0.00198069	0.0411353	-0.0471081
420.888	0.226695	0.00230818	0.0430148	-0.0429516
421.37	0.224418	0.00251842	0.0445912	-0.038716
421.852	0.221219	0.00248872	0.0456595	-0.0347969
422.334	0.217725	0.00211751	0.0461474	-0.0316117
422.816	0.214542	0.00143475	0.0461267	-0.029405
423.298	0.211976	0.000657911	0.0457819	-0.0281859
423.781	0.209858	0.000213867	0.045388	-0.0276798
424.263	0.207668	0.000579735	0.0452219	-0.0274423
424.745	0.204821	0.00213233	0.0454863	-0.0270216
425.227	0.201025	0.00493036	0.0462063	-0.0261792
425.709	0.196482	0.00865942	0.0472151	-0.0249773
426.191	0.19172	0.0127334	0.0481981	-0.023701
426.673	0.187304	0.0164906	0.0487973	-0.0226693
427.155	0.183519	0.0194158	0.0487328	-0.0220528
427.637	0.180332	0.0211439	0.0478316	-0.0218347
428.12	0.177427	0.0215225	0.0460782	-0.0218389
428.602	0.174434	0.0206088	0.0436345	-0.0218489
429.084	0.171082	0.0186071	0.0407941	-0.0217312
429.566	0.167354	0.0158259	0.0379013	-0.0215157
430.048	0.163432	0.0125847	0.0352429	-0.0213569
430.53	0.159552	0.00920745	0.0330082	-0.021445
431.012	0.155843	0.0059854	0.0312552	-0.0218628
431.495	0.152256	0.00317348	0.0299434	-0.0225296
431.977	0.148599	0.00100419	0.0289715	-0.0232103
432.459	0.144676	-0.000381503	0.0282062	-0.0236339
432.941	0.140383	-0.000963132	0.0275207	-0.0236106
433.423	0.135746	-0.000846577	0.0267981	-0.0231011
433.905	0.130862	-0.000215848	0.0259655	-0.0222139
434.387	0.125788	0.000724052	0.0249896	-0.0211279
434.869	0.120452	0.00178089	0.0238767	-0.0200163
435.351	0.114662	0.00279525	0.0226524	-0.0189853
435.834	0.108176	0.00360045	0.0213487	-0.0180772
436.316	0.100844	0.00398774	0.0199717	-0.0173072
436.798	0.0927327	0.00374688	0.018488	-0.0167134
437.28	0.0841135	0.00269985	0.016831	-0.0163616
437.762	0.0753616	0.000775366	0.014929	-0.0163245
438.244	0.0668179	-0.00194284	0.0127514	-0.0166299
438.726	0.0587651	-0.00521835	0.0103343	-0.0172283
439.208	0.0514202	-0.00868284	0.00779025	-0.0179987
439.69	0.0449335	-0.011925	0.00528386	-0.0187939
440.173	0.0394382	-0.0145146	0.0030172	-0.0194773
440.655	0.0350017	-0.0161461	0.00116194	-0.0199931
441.137	0.0315918	-0.0167208	-0.000200216	-0.0203862
441.619	0.0290678	-0.0163592	-0.00108508	-0.0207629
442.101	0.0272128	-0.0153435	-0.00159397	-0.0212094
442.583	0.0258066	-0.0139838	-0.00185043	-0.0217109
443.065	0.02466	-0.0125473	-0.00196306	-0.0221236
443.547	0.0236646	-0.0111939	-0.00199475	-0.0222311
444.029	0.0227799	-0.0100122	-0.00198552	-0.0218629
444.512	0.0219963	-0.00907564	-0.00197143	-0.0209679
444.994	0.0213078	-0.00846687	-0.00200118	-0.0196647
445.476	0.0206967	-0.00827261	-0.00212175	-0.0181869
445.958	0.0201387	-0.00853845	-0.00235292	-0.0167999
446.44	0.0196206	-0.00921804	-0.00266542	-0.0156895
446.922	0.0191513	-0.0101498	-0.00298036	-0.0149203
447.404	0.0187644	-0.0110741	-0.00318941	-0.0144297
447.886	0.0184948	-0.0117327	-0.00321644	-0.0140849
448.369	0.0183605	-0.0119357	-0.00304627	-0.0137493
448.851	0.0183438	-0.0116324	-0.00274465	-0.0133459
449.333	0.0183981	-0.0109024	-0.00241507	-0.0128716
449.815	0.0184621	-0.0099012	-0.00216296	-0.0123766
450.297	0.0184844	-0.00879578	-0.00203881	-0.0119186
450.779	0.0184394	-0.00771352	-0.00202608	-0.0115336
451.261	0.0183275	-0.00675687	-0.00204808	-0.011235
451.743	0.0181719	-0.00601254	-0.00200804	-0.0110222
452.226	0.0180003	-0.00556703	-0.00184205	-0.0108959
452.708	0.0178387	-0.00551417	-0.00155049	-0.0108688
453.19	0.0177058	-0.0059174	-0.00119294	-0.0109447
453.672	0.0176194	-0.00678108	-0.000846214	-0.0111017
454.154	0.0176075	-0.00802492	-0.000562847	-0.0112704
454.636	0.0177089	-0.00948735	-0.000343265	-0.0113426
455.118	0.0179609	-0.0109536	-0.000138412	-0.0111969
455.6	0.0183835	-0.0121627	0.000123342	-0.0107348
456.082	0.0189508	-0.0128849	0.000497594	-0.00993595
456.565	0.019583	-0.0129784	0.00099267	-0.00889513
457.047	0.0201516	-0.0124391	0.00155531	-0.00782522
457.529	0.0205424	-0.0114078	0.00209874	-0.00697095
458.011	0.0207028	-0.010103	0.00255075	-0.00650352
458.493	0.0206801	-0.00872937	0.0028916	-0.00644946
458.975	0.020585	-0.0074003	0.0031614	-0.00669286
459.457	0.0205453	-0.00615329	0.00342001	-0.00705941
459.939	0.0206548	-0.00500048	0.00371249	-0.00739271
460.421	0.0209434	-0.0039754	0.00404473	-0.00761188
460.904	0.0213927	-0.0031575	0.00438897	-0.00769548
461.386	0.0219535	-0.00265436	0.00470635	-0.00766163
461.868	0.0225807	-0.00254824	0.00497661	-0.00753002
462.35	0.0232447	-0.00285885	0.00520911	-0.00730504
462.832	0.0239404	-0.00350705	0.00545102	-0.00696766
463.314	0.0246766	-0.00434014	0.00576112	-0.00649555
463.796	0.0254589	-0.00516796	0.0061934	-0.00587994
464.278	0.0262812	-0.00582711	0.00677723	-0.00513646
464.761	0.0271255	-0.00622127	0.00751928	-0.00429857
465.243	0.0279782	-0.00630488	0.00842018	-0.00340203
465.725	0.0288475	-0.00606688	0.0094918	-0.00246838
466.207	0.0297693	-0.00550416	0.0107569	-0.0015001
466.689	0.0308067	-0.00461272	0.0122407	-0.000488055
467.171	0.0320245	-0.00340035	0.0139467	0.000576849
467.653	0.0334605	-0.00190675	0.0158419	0.00169194
468.135	0.0351194	-0.00022065	0.0178602	0.00284544
468.618	0.036976	0.00153928	0.0199373	0.00403185
469.1	0.0390094	0.00324668	0.022045	0.00526407
469.582	0.0412311	0.00478782	0.02422	0.0065783
470.064	0.0437071	0.00609019	0.0265691	0.0080197
470.546	0.0465524	0.0071194	0.0292581	0.00961611
471.028	0.0499069	0.00787678	0.0324798	0.0113387
471.51	0.0538833	0.00839417	0.0363959	0.0130907
471.992	0.0585358	0.00873606	0.0411002	0.0147057
472.474	0.0638493	0.00900887	0.0465965	0.0160014
472.957	0.0697654	0.0093566	0.0528035	0.0168533
473.439	0.0762473	0.00998382	0.0595937	0.0172244
473.921	0.0833087	0.0111464	0.0668014	0.017159
474.403	0.0909951	0.0131027	0.0742167	0.0167339
474.885	0.0993276	0.0161006	0.0815103	0.0160094
475.367	0.108201	0.0202949	0.0881967	0.0150024
475.849	0.117327	0.02568	0.0936797	0.0136971
476.331	0.12614	0.0320195	0.0972387	0.0120722
476.813	0.133863	0.0388142	0.0982364	0.0101463
477.296	0.139682	0.0453699	0.0963231	0.00800363
477.778	0.14289	0.0508299	0.0915659	0.00580803
478.26	0.143204	0.0544361	0.0845251	0.00376493
478.742	0.140876	0.0557309	0.0761077	0.00206718
479.224	0.136681	0.0546607	0.0674116	0.000861079
479.706	0.131662	0.0515983	0.0593957	0.000199745
480.188	0.126859	0.0471953	0.0527379	5.38462e-05
480.67	0.123159	0.0422437	0.0478193	0.000329809
481.152	0.121087	0.0374419	0.0446997	0.000907163
481.635	0.120844	0.0333271	0.043222	0.0016615
482.117	0.122344	0.0302371	0.0430807	0.0024727
482.599	0.125325	0.0282775	0.0439313	0.00324258
483.081	0.129456	0.0273823	0.0454393	0.00389492
483.563	0.13446	0.027369	0.0473382	0.00438542
484.045	0.140216	0.0280361	0.0494787	0.00471212
484.527	0.146764	0.02921	0.0518148	0.00492141
485.01	0.154282	0.030784	0.0543866	0.00510007
485.492	0.162994	0.0327155	0.0572746	0.00534386
485.974	0.173114	0.0349892	0.06057	0.00574064
486.456	0.184782	0.0375788	0.064334	0.00633741
486.938	0.198025	0.0404297	0.068573	0.00712846
487.42	0.212742	0.0434482	0.073231	0.00806786
487.902	0.228693	0.0465181	0.0781813	0.0090878
488.384	0.245519	0.0495243	0.0832489	0.0101269
488.866	0.262681	0.0523532	0.0882019	0.0111396
489.349	0.279539	0.0549126	0.0928023	0.0121022
489.831	0.295451	0.0571364	0.0968496	0.0129996
490.313	0.309835	0.0589803	0.100207	0.0138099
490.795	0.322347	0.0604265	0.102842	0.0144959
491.277	0.332894	0.0614817	0.104808	0.015009
491.759	0.341593	0.0621744	0.106222	0.0153051
492.241	0.348616	0.0625487	0.107204	0.0153695
492.723	0.354095	0.062662	0.107847	0.0152285
493.205	0.358096	0.0625857	0.10821	0.0149528
493.688	0.360676	0.0623957	0.108332	0.0146306
494.17	0.361986	0.062173	0.108255	0.0143462
494.652	0.362335	0.0619937	0.108043	0.0141539
495.134	0.362108	0.0619137	0.107768	0.0140647
495.616	0.361684	0.0619644	0.107494	0.0140544
496.098	0.361297	0.0621426	0.107255	0.0140787
496.58	0.360969	0.0624166	0.107041	0.0140976
497.062	0.36056	0.0627299	0.106812	0.0140848
497.545	0.359878	0.0630221	0.106522	0.0140366
498.027	0.358828	0.0632499	0.106151	0.0139686
498.509	0.35748	0.0633979	0.105718	0.0139074
498.991	0.356041	0.0634834	0.105283	0.0138849
499.473	0.354727	0.0635403	0.104913	0.0139289
499.955	0.353664	0.0636051	0.104659	0.0140639
500.437	0.352791	0.0636919	0.104534	0.0143005
500.919	0.351899	0.063781	0.104498	0.0146282
501.401	0.35072	0.0638186	0.104474	0.0150028
501.884	0.349096	0.0637382	0.104376	0.0153515
502.366	0.347074	0.0634927	0.104138	0.0155921
502.848	0.344885	0.0630763	0.10373	0.0156573
503.33	0.34279	0.0625314	0.103154	0.015524
503.812	0.340942	0.061929	0.102418	0.0152168
504.294	0.339299	0.061345	0.101523	0.0147919
504.776	0.337657	0.0608279	0.100453	0.0143112
505.258	0.33573	0.0603861	0.0991846	0.0138166
505.74	0.333226	0.0599797	0.0976987	0.0133143
506.223	0.329925	0.0595298	0.0959808	0.0127743
506.705	0.325623	0.0589312	0.0940137	0.012147
507.187	0.320049	0.058076	0.0917591	0.0113926
507.669	0.312862	0.0568829	0.0891564	0.0105092
508.151	0.303644	0.0553014	0.0861223	0.00953786
508.633	0.292088	0.0533189	0.0825894	0.00855144
509.115	0.278214	0.0509578	0.0785515	0.00761905
509.597	0.262481	0.0482728	0.074093	0.00678598
510.079	0.245779	0.0453544	0.0694017	0.00605898
510.562	0.229168	0.0423181	0.0647213	0.00541428
511.044	0.213729	0.0393164	0.0603281	0.00482206
511.526	0.200259	0.0365185	0.056455	0.00427435
512.008	0.189139	0.0340812	0.0532392	0.00379594
512.49	0.180405	0.0321434	0.0507256	0.00344268
512.972	0.173801	0.0307855	0.0488629	0.00327322
513.454	0.168932	0.0300179	0.0475416	0.00331853
513.937	0.165379	0.0297812	0.0466247	0.00356734
514.419	0.162797	0.029965	0.0459902	0.00396758
514.901	0.160932	0.0304378	0.0455499	0.00445076
515.383	0.159585	0.031064	0.0452446	0.0049568
515.865	0.158585	0.0317375	0.045044	0.00546296
516.347	0.157768	0.0323795	0.0449249	0.0059811
516.829	0.156972	0.0329293	0.0448572	0.00653841
517.311	0.156095	0.0333375	0.0448033	0.00714338
517.793	0.155109	0.0335524	0.0447177	0.00775854
518.275	0.15407	0.0335209	0.0445622	0.00829831
518.758	0.153074	0.0332076	0.0443223	0.00866537
519.24	0.152213	0.032608	0.0440136	0.00878562
519.722	0.151543	0.0317676	0.043685	0.00864827
520.204	0.151079	0.0307793	0.0434069	0.008316
520.686	0.150832	0.0297767	0.0432633	0.00791167
521.168	0.150844	0.0289075	0.0433349	0.00758216
521.65	0.1512	0.0282911	0.0436786	0.00744775
522.132	0.152024	0.0280108	0.0443266	0.00758823
522.615	0.153439	0.0280938	0.0452797	0.0080249
523.097	0.15552	0.0285167	0.0465144	0.00873501
523.579	0.158259	0.0292104	0.0479833	0.00966181
524.061	0.161557	0.030069	0.0496209	0.0107272
524.543	0.165247	0.0309639	0.0513508	0.0118419
525.025	0.169112	0.0317431	0.0530821	0.012899
525.507	0.172958	0.0322686	0.0547296	0.0137954
525.989	0.17665	0.0324498	0.0562295	0.0144581
526.471	0.1801	0.0322665	0.0575481	0.0148641
526.954	0.183255	0.0317814	0.0586866	0.0150571
527.436	0.186054	0.0311196	0.0596727	0.0151377
527.918	0.188417	0.0304424	0.0605493	0.0152393
528.4	0.190277	0.0298939	0.0613575	0.015477
528.882	0.191607	0.0295761	0.0621315	0.0159212
529.364	0.192457	0.0295254	0.062891	0.0165725
529.846	0.192947	0.0297079	0.063639	0.0173653
530.328	0.193231	0.0300301	0.0643622	0.0181884
530.811	0.193436	0.0303695	0.0650354	0.0189241
531.293	0.193618	0.0306198	0.0656307	0.0194962
531.775	0.193755	0.0307122	0.0661273	0.0198894
532.257	0.193779	0.0306351	0.0665223	0.0201569
532.739	0.193634	0.030428	0.0668343	0.020389
533.221	0.193315	0.0301621	0.0671026	0.0206907
533.703	0.192878	0.0299102	0.0673743	0.021139
534.185	0.192405	0.0297181	0.0676854	0.0217622
534.668	0.191957	0.0295992	0.0680511	0.022541
535.15	0.191538	0.0295318	0.0684569	0.0234181
535.632	0.191092	0.0294761	0.0688639	0.0243205
536.114	0.190535	0.0293859	0.0692195	0.0251726
536.596	0.189811	0.0292292	0.0694733	0.0259148
537.078	0.188925	0.0289955	0.069593	0.0265105
537.56	0.187939	0.0286976	0.0695622	0.0269447
538.042	0.186938	0.0283648	0.0693811	0.0272236
538.524	0.185973	0.0280342	0.0690569	0.0273682
539.006	0.185041	0.0277435	0.0686	0.0274107
539.489	0.184083	0.0275178	0.0680228	0.0273855
539.971	0.183024	0.0273674	0.0673462	0.027323
540.453	0.181821	0.0272816	0.0666032	0.0272436
540.935	0.180496	0.0272348	0.0658355	0.0271528
541.417	0.179128	0.0271896	0.0650845	0.027041
541.899	0.177814	0.0271076	0.0643813	0.0268897
542.381	0.17661	0.0269615	0.0637332	0.0266804
542.864	0.175509	0.0267376	0.0631235	0.026398
543.346	0.17444	0.0264387	0.0625165	0.0260347
543.828	0.17331	0.026078	0.0618733	0.0255898
544.31	0.172047	0.0256757	0.0611633	0.0250655
544.792	0.170639	0.0252511	0.0603769	0.0244681
545.274	0.169126	0.0248187	0.0595266	0.023807
545.756	0.167579	0.0243902	0.0586434	0.0231009
546.238	0.166044	0.0239759	0.0577648	0.0223807
546.72	0.164518	0.0235859	0.056924	0.0216862
547.202	0.162958	0.0232312	0.0561448	0.0210621
547.685	0.161305	0.0229175	0.0554372	0.0205431
548.167	0.159537	0.0226399	0.0547972	0.0201404
548.649	0.157683	0.0223805	0.0542067	0.0198361
549.131	0.155816	0.0221103	0.053637	0.0195873
549.613	0.15401	0.0217989	0.053053	0.0193412
550.095	0.152308	0.0214228	0.0524193	0.0190495
550.577	0.15069	0.0209777	0.0517117	0.0186894
551.059	0.149087	0.02048	0.050926	0.0182685
551.542	0.147418	0.0199652	0.0500826	0.017821
552.024	0.145632	0.0194719	0.049218	0.0173885
552.506	0.143732	0.0190311	0.0483729	0.0170056
552.988	0.141768	0.0186569	0.0475759	0.0166852
553.47	0.1398	0.0183396	0.0468286	0.0164125
553.952	0.137868	0.0180527	0.0461033	0.0161523
554.434	0.135961	0.0177584	0.0453532	0.0158577
554.916	0.134033	0.0174234	0.0445342	0.0154911
555.399	0.132024	0.0170237	0.0436218	0.0150306
555.881	0.1299	0.0165534	0.0426271	0.0144821
556.363	0.127667	0.0160237	0.0415912	0.0138756
556.845	0.125371	0.0154605	0.0405744	0.0132629
557.327	0.123063	0.0148971	0.0396313	0.0127042
557.809	0.120769	0.014365	0.0387914	0.0122503
558.291	0.118473	0.013888	0.0380544	0.0119363
558.773	0.116127	0.0134754	0.0373925	0.0117658
559.255	0.113674	0.0131192	0.0367666	0.0117113
559.737	0.111079	0.0127954	0.0361378	0.0117155
560.22	0.108338	0.0124726	0.0354826	0.0117116
560.702	0.10548	0.012123	0.0347935	0.0116442
561.184	0.102533	0.0117286	0.0340716	0.0114815
561.666	0.0995097	0.0112873	0.0333178	0.0112271
562.148	0.0963918	0.010808	0.032524	0.0109114
562.63	0.0931402	0.0103001	0.0316706	0.0105771
563.112	0.0897192	0.0097622	0.0307327	0.0102566
563.595	0.0861149	0.00917709	0.0296878	0.00995934
564.077	0.0823402	0.00851099	0.0285229	0.00966831
564.559	0.0784224	0.00772984	0.0272396	0.00935226
565.041	0.0743863	0.00681223	0.0258535	0.00898154
565.523	0.0702373	0.00576515	0.024391	0.00854404
566.005	0.0659648	0.00462661	0.0228844	0.00805251
566.487	0.0615592	0.00346052	0.02137	0.0075385
566.969	0.0570377	0.00234029	0.0198854	0.00703854
567.451	0.0524581	0.00132121	0.018463	0.00657558
567.933	0.0479204	0.000432183	0.0171287	0.00615179
568.416	0.0435477	-0.000331611	0.0158976	0.00574823
568.898	0.0394496	-0.000993514	0.0147739	0.00534075
569.38	0.0357117	-0.00157891	0.013755	0.00491253
569.862	0.0323807	-0.00209847	0.0128339	0.00446606
570.344	0.0294666	-0.00254283	0.0120053	0.00402399
570.826	0.0269554	-0.00289061	0.0112641	0.00362107
571.308	0.024819	-0.00312362	0.0106055	0.00328921
571.79	0.0230231	-0.00323946	0.0100247	0.0030482
572.273	0.02153	-0.00325801	0.00951209	0.00290211
572.755	0.0203016	-0.00321503	0.00905488	0.00284001
573.237	0.0192995	-0.00315102	0.00863904	0.00284414
573.719	0.0184839	-0.00310529	0.00824822	0.002889
574.201	0.0178168	-0.00310638	0.007867	0.00294237
574.683	0.0172628	-0.00317036	0.00748338	0.00296606
575.165	0.0167888	-0.00330402	0.0070877	0.00291395
575.647	0.0163702	-0.00350328	0.00667698	0.0027471
576.13	0.0159887	-0.00375303	0.00625545	0.00244644
576.612	0.0156329	-0.00402441	0.00583513	0.00202583
577.094	0.0152962	-0.00428	0.0054323	0.0015311
577.576	0.0149749	-0.00447491	0.00506761	0.00103385
578.058	0.0146666	-0.00457079	0.00475901	0.000609132
578.54	0.0143698	-0.00454751	0.00451812	0.000308753
579.022	0.0140845	-0.00441079	0.00435001	0.000153338
579.504	0.0138115	-0.00419403	0.00425089	0.000125928
579.986	0.0135535	-0.00394621	0.00421101	0.000184596
580.469	0.0133137	-0.00372113	0.00421653	0.000279609
580.951	0.0130949	-0.00355895	0.00425293	0.000372951
581.433	0.0128994	-0.00347609	0.00430534	0.000447673
581.915	0.0127279	-0.00347169	0.00435855	0.000501773
582.397	0.0125809	-0.00353627	0.00439419	0.000534914
582.879	0.0124585	-0.00366512	0.00439366	0.000535677
583.361	0.0123611	-0.00386316	0.00433897	0.000476397
583.843	0.0122886	-0.00414156	0.00421951	0.000322414
584.326	0.0122404	-0.0045036	0.0040363	4.86766e-05
584.808	0.0122142	-0.0049315	0.00380757	-0.0003431
585.29	0.0122056	-0.00537988	0.0035641	-0.000816549
585.772	0.0122087	-0.00578186	0.00334364	-0.00130772
586.254	0.0122155	-0.00606224	0.00318203	-0.00173854
586.736	0.0122188	-0.006166	0.00309989	-0.00204544
587.218	0.0122124	-0.00607113	0.00309859	-0.00219389
587.7	0.0121937	-0.0057955	0.0031617	-0.00218136
588.182	0.012164	-0.00538718	0.00326177	-0.00203093
588.665	0.0121281	-0.0049125	0.00336915	-0.00178022
589.147	0.0120943	-0.00444294	0.00345885	-0.00147197
589.629	0.0120701	-0.00403997	0.003517	-0.00114688
590.111	0.0120617	-0.00375467	0.00353918	-0.000849785
590.593	0.0120704	-0.00362454	0.00352923	-0.000628065
591.075	0.0120926	-0.00366742	0.00349515	-0.000523964
591.557	0.0121195	-0.00387925	0.00344626	-0.000568969
592.039	0.0121414	-0.00422721	0.00339132	-0.000764623
592.521	0.0121499	-0.00465606	0.00333669	-0.00107946
593.004	0.0121423	-0.00508826	0.00328801	-0.00144819
593.486	0.0121208	-0.00544497	0.00324855	-0.00179068
593.968	0.0120931	-0.00566598	0.00322038	-0.00203783
594.45	0.0120679	-0.00571833	0.00320442	-0.00214325
594.932	0.0120521	-0.00560573	0.00320225	-0.00209768
595.414	0.0120479	-0.00535992	0.00321674	-0.00192159
595.896	0.0120533	-0.00502977	0.00325393	-0.00165329
596.378	0.0120638	-0.00466163	0.00332093	-0.00133025
596.861	0.012076	-0.0042906	0.00342275	-0.000980125
597.343	0.0120907	-0.00394033	0.00355872	-0.000622209
597.825	0.0121133	-0.00362737	0.0037183	-0.000273204
598.307	0.012152	-0.00337159	0.00388078	4.24799e-05
598.789	0.0122153	-0.00320154	0.00401797	0.000286174
599.271	0.0123073	-0.00314826	0.004105	0.000416131
599.753	0.012426	-0.00323496	0.00412597	0.000398189
600.235	0.0125629	-0.00346091	0.00408286	0.000223547
600.717	0.0127063	-0.00379409	0.00399497	-8.16346e-05
601.2	0.0128449	-0.00417326	0.00389469	-0.000459425
601.682	0.0129719	-0.00452154	0.00381861	-0.000835003
602.164	0.0130856	-0.00477596	0.0037932	-0.00114446
602.646	0.0131902	-0.00489821	0.00383181	-0.00134534
603.128	0.013292	-0.00488691	0.00392986	-0.00142778
603.61	0.013397	-0.00477094	0.00407092	-0.00140813
604.092	0.0135098	-0.00459787	0.00423095	-0.00131766
604.574	0.0136335	-0.00441594	0.00438723	-0.00118825
605.057	0.0137692	-0.00425851	0.00452418	-0.00104273
605.539	0.0139208	-0.00414376	0.00463411	-0.000895551
606.021	0.0140929	-0.00407365	0.00471865	-0.000754271
606.503	0.0142908	-0.0040421	0.00478484	-0.000624757
606.985	0.0145186	-0.00404036	0.00484381	-0.000513208
607.467	0.0147764	-0.00406006	0.00490737	-0.000424803
607.949	0.0150597	-0.00409161	0.00498633	-0.000358727
608.431	0.0153596	-0.00412151	0.00508964	-0.00030658
608.913	0.0156672	-0.0041329	0.00522359	-0.000252375
609.396	0.0159763	-0.00410972	0.00539009	-0.000178788
609.878	0.016287	-0.00404119	0.00558807	-7.18618e-05
610.36	0.0166059	-0.00392762	0.00581468	7.2669e-05
610.842	0.0169463	-0.0037801	0.00606775	0.00025103
611.324	0.0173237	-0.00361646	0.00634716	0.000454937
611.806	0.0177513	-0.00345118	0.00665669	0.000679116
612.288	0.0182381	-0.00329162	0.0070016	0.000923599
612.77	0.018787	-0.00313283	0.00738701	0.0011943
613.253	0.0193962	-0.00296308	0.00781552	0.00149732
613.735	0.0200618	-0.00276974	0.00828517	0.00183336
614.217	0.0207802	-0.00254781	0.00879059	0.00219327
614.699	0.0215504	-0.00230379	0.00932524	0.00255951
615.181	0.0223732	-0.00205448	0.0098834	0.00290985
615.663	0.0232511	-0.00182057	0.0104622	0.00322505
616.145	0.0241866	-0.0016175	0.011063	0.00349592
616.627	0.0251834	-0.00145067	0.0116898	0.00372485
617.109	0.0262478	-0.00131215	0.0123484	0.00392425
617.592	0.0273897	-0.00118567	0.0130451	0.00411035
618.074	0.028626	-0.00105202	0.0137859	0.00429851
618.556	0.029979	-0.000895551	0.0145755	0.0044982
619.038	0.0314731	-0.000706935	0.015419	0.0047149
619.52	0.0331361	-0.000480343	0.0163213	0.00495298
620.002	0.0349958	-0.000209953	0.017288	0.00521873
620.484	0.0370823	0.000113863	0.0183285	0.00552353
620.966	0.0394328	0.000505953	0.0194563	0.00588218
621.448	0.0420925	0.000984434	0.0206909	0.00630907
621.931	0.0451172	0.00156592	0.0220571	0.00681374
622.413	0.0485738	0.00226154	0.0235828	0.00739595
622.895	0.0525282	0.00307253	0.0252905	0.00804221
623.377	0.0570389	0.00398985	0.0271919	0.00872406
623.859	0.0621472	0.00499219	0.0292778	0.00939675
624.341	0.0678691	0.00605424	0.0315188	0.0100093
624.823	0.0741938	0.00714779	0.0338633	0.0105082
625.305	0.0810844	0.00824913	0.036245	0.0108514
625.788	0.0884836	0.00934498	0.0385974	0.0110202
626.27	0.0962965	0.0104307	0.0408519	0.0110221
626.752	0.104373	0.0115063	0.0429401	0.0108907
627.234	0.112501	0.0125695	0.0447943	0.0106713
627.716	0.120368	0.0136065	0.0463377	0.0104153
628.198	0.127578	0.0145878	0.047491	0.010164
628.68	0.133716	0.0154707	0.0481863	0.00993947
629.162	0.138352	0.0161986	0.0483704	0.00974587
629.644	0.141128	0.0167136	0.048019	0.00957177
630.127	0.141793	0.0169665	0.0471345	0.00939922
630.609	0.140199	0.0169189	0.0457424	0.00921087
631.091	0.136331	0.0165524	0.0438835	0.0089953
631.573	0.13031	0.01587	0.0416099	0.00874569
632.055	0.122421	0.014897	0.038989	0.00845457
632.537	0.113087	0.0136762	0.0360997	0.0081108
633.019	0.102827	0.0122631	0.0330306	0.00769709
633.501	0.0922078	0.0107206	0.0298823	0.00719499
633.984	0.0817225	0.00910759	0.0267491	0.00659408
634.466	0.0717636	0.00747917	0.0237211	0.00590042
634.948	0.0626105	0.00588749	0.0208805	0.00514244
635.43	0.0544104	0.00437652	0.0182906	0.00436467
635.912	0.0472248	0.00298618	0.0159984	0.00361943
636.394	0.041045	0.00174696	0.0140269	0.00295208
636.876	0.0358122	0.0006751	0.0123726	0.0023853
637.358	0.0314329	-0.000227372	0.0110082	0.00191785
637.841	0.0277929	-0.000970372	0.0098893	0.00152927
638.323	0.0247785	-0.00156993	0.00896915	0.0011941
638.805	0.0222792	-0.00204234	0.0082024	0.000892022
639.287	0.0201993	-0.002401	0.00755387	0.000617959
639.769	0.0184667	-0.00265521	0.00700018	0.000380678
640.251	0.0170204	-0.00281454	0.00652512	0.000197259
640.733	0.0158129	-0.00289154	0.00611775	8.28761e-05
641.215	0.0148049	-0.00290292	0.00577025	4.37391e-05
641.697	0.0139586	-0.0028706	0.00547659	7.48562e-05
642.179	0.0132405	-0.00281747	0.00523436	0.000163216
642.662	0.0126226	-0.00276434	0.00504415	0.000292341
643.144	0.0120839	-0.00272868	0.00490895	0.000444356
643.626	0.0116112	-0.00272298	0.00482963	0.000602662
644.108	0.0111988	-0.00275482	0.00480099	0.000751799
644.59	0.0108451	-0.00282781	0.00480983	0.000875886
645.072	0.0105489	-0.002941	0.00483788	0.000962948
645.554	0.0103073	-0.00308878	0.00486461	0.00100602
646.036	0.0101141	-0.00325906	0.0048747	0.00100675
646.519	0.00996134	-0.00343553	0.00486203	0.000975999
647.001	0.00984005	-0.00359812	0.00483104	0.000931767
647.483	0.00974255	-0.00372488	0.00479536	0.000895741
647.965	0.00966344	-0.00379997	0.00477074	0.000885017
648.447	0.00959951	-0.00381396	0.00477218	0.000910815
648.929	0.00954961	-0.00376686	0.00480849	0.000975567
649.411	0.00951351	-0.00366762	0.0048809	0.0010759
649.893	0.0094919	-0.00353131	0.00498459	0.0012057
650.375	0.00948598	-0.0033778	0.0051113	0.00135783
650.858	0.00949678	-0.00322868	0.00525163	0.00152492
651.34	0.00952567	-0.00310743	0.0053962	0.00169736
651.822	0.00957272	-0.00303515	0.0055383	0.00186357
652.304	0.00963613	-0.00302551	0.00567474	0.00201294
652.786	0.00971246	-0.00308157	0.00580749	0.00213916
653.268	0.00979596	-0.00319141	0.00594385	0.00224672
653.75	0.00988052	-0.00333006	0.00609456	0.00235065
654.232	0.00995998	-0.00346301	0.00627094	0.00247446
654.715	0.0100311	-0.00355576	0.00648079	0.00264188
655.197	0.0100937	-0.00358442	0.00672382	0.00286645
655.679	0.0101516	-0.00354071	0.00699143	0.00314645
656.161	0.0102113	-0.00343346	0.00726958	0.00346523
656.643	0.0102813	-0.00328399	0.00754426	0.00379745
657.125	0.01037	-0.00311763	0.0078057	0.00411788
657.607	0.0104827	-0.00295321	0.00805288	0.00441193
658.089	0.0106211	-0.00280243	0.0082902	0.0046737
658.572	0.0107822	-0.0026701	0.00852502	0.00490439
659.054	0.010959	-0.00255874	0.00876223	0.00510536
659.536	0.011141	-0.00247323	0.00900281	0.00527437
660.018	0.0113178	-0.00242242	0.0092435	0.00540482
660.5	0.0114815	-0.00241438	0.00948235	0.00549326
660.982	0.0116278	-0.00245326	0.00972042	0.0055438
661.464	0.0117562	-0.00253341	0.00996347	0.00557229
661.946	0.0118689	-0.00264102	0.0102181	0.00560099
662.428	0.0119689	-0.00275716	0.010486	0.00565147
662.91	0.01206	-0.00286616	0.0107598	0.00573208
663.393	0.0121447	-0.00296256	0.0110239	0.00583348
663.875	0.0122258	-0.00305186	0.0112585	0.00593149
664.357	0.0123064	-0.00314608	0.0114496	0.00599961
664.839	0.0123917	-0.00325459	0.0115968	0.00602471
665.321	0.0124885	-0.00337563	0.0117165	0.00601762
665.803	0.0126073	-0.00348894	0.0118453	0.00602172
666.285	0.0127605	-0.00355251	0.0120379	0.00611472
666.768	0.0129575	-0.00350528	0.0123608	0.00640032
667.25	0.0131961	-0.00329642	0.0128591	0.00695813
667.732	0.0134524	-0.00293284	0.0135122	0.00776694
668.214	0.0136867	-0.002512	0.0142104	0.00865942
668.696	0.013867	-0.00216827	0.01482	0.00941476
669.178	0.0139879	-0.00198654	0.0152689	0.00990052
669.66	0.0140669	-0.00196906	0.0155706	0.0101215
670.142	0.0141275	-0.0020645	0.0157837	0.0101624
670.624	0.0141906	-0.00221011	0.0159714	0.0101216
671.107	0.0142704	-0.00235174	0.0161822	0.0100778
671.589	0.0143743	-0.0024552	0.0164428	0.0100765
672.071	0.0145047	-0.00250228	0.0167622	0.0101387
672.553	0.0146594	-0.00249023	0.017134	0.0102632
673.035	0.014834	-0.00242697	0.0175434	0.010437
673.517	0.0150226	-0.00232527	0.0179735	0.0106445
673.999	0.0152217	-0.002196	0.0184118	0.0108767
674.481	0.0154301	-0.00204587	0.0188541	0.0111316
674.963	0.0156481	-0.00188059	0.0193026	0.0114099
675.446	0.0158759	-0.00170893	0.019762	0.0117075
675.928	0.0161121	-0.00154441	0.0202357	0.0120113
676.41	0.0163531	-0.00140655	0.0207237	0.0122992
676.892	0.0165928	-0.00131307	0.0212239	0.0125491
677.374	0.0168262	-0.00127343	0.0217325	0.0127465
677.856	0.0170499	-0.00128506	0.0222465	0.0128908
678.338	0.017264	-0.00133325	0.0227641	0.0129959
678.82	0.0174712	-0.00139684	0.0232858	0.0130846
679.303	0.0176771	-0.00145344	0.0238149	0.0131828
679.785	0.0178872	-0.00148709	0.024358	0.0133109
680.267	0.0181056	-0.00149003	0.0249265	0.0134808
680.749	0.0183352	-0.00146143	0.0255353	0.0136971
681.231	0.0185759	-0.00140582	0.0262001	0.0139584
681.713	0.0188253	-0.00132866	0.0269347	0.0142603
682.195	0.0190805	-0.00123692	0.0277465	0.0145977
682.677	0.0193379	-0.00113832	0.028636	0.0149647
683.159	0.019595	-0.0010424	0.0295979	0.0153556
683.642	0.0198507	-0.000960586	0.030625	0.0157649
684.124	0.0201051	-0.000901965	0.0317143	0.0161909
684.606	0.0203603	-0.00087085	0.0328709	0.0166367
685.088	0.0206184	-0.000864137	0.0341101	0.017112
685.57	0.0208811	-0.000871577	0.0354541	0.0176319
686.052	0.0211487	-0.000879117	0.0369309	0.0182162
686.534	0.0214196	-0.000873925	0.0385709	0.0188863
687.016	0.0216899	-0.000849223	0.0404048	0.0196659
687.499	0.0219549	-0.000805239	0.0424707	0.0205846
687.981	0.0222091	-0.000747821	0.0448173	0.0216851
688.463	0.022449	-0.000683514	0.0475051	0.0230266
688.945	0.0226727	-0.000615658	0.0506173	0.0247027
689.427	0.0228818	-0.000541933	0.0542513	0.0268411
689.909	0.0230792	-0.000456116	0.0585138	0.0296049
690.391	0.0232697	-0.000351377	0.0635233	0.0332094
690.873	0.0234585	-0.000224425	0.0693921	0.0378958
691.356	0.0236504	-7.77586e-05	0.0762179	0.0439192
691.837	0.0238496	8.05232e-05	0.084072	0.0515331
692.32	0.0240599	0.00024062	0.0929753	0.0609282
692.802	0.0242837	0.000393214	0.102873	0.0721896
693.284	0.0245223	0.000531961	0.113597	0.0852276
693.766	0.0247758	0.000652833	0.124868	0.0997545
694.248	0.0250434	0.000752662	0.136262	0.115224
694.73	0.0253215	0.00082798	0.147228	0.130828
695.212	0.0256065	0.000874359	0.157185	0.145639
695.694	0.0258926	0.000888901	0.165544	0.158647
696.177	0.0261742	0.000872633	0.171814	0.168945
696.659	0.026446	0.000832595	0.175697	0.175924
697.141	0.0267051	0.000781872	0.177087	0.179312
697.623	0.0269499	0.000736398	0.176089	0.17922
698.105	0.0271826	0.000709615	0.172959	0.176038
698.587	0.0274069	0.000708885	0.168071	0.170362
699.069	0.0276285	0.000732648	0.161841	0.162841
699.551	0.0278521	0.000772478	0.154661	0.15406
700.034	0.028082	0.0008151	0.146898	0.144537
700.516	0.0283211	0.000848264	0.138847	0.134661
700.998	0.0285713	0.000863801	0.130725	0.124704
701.48	0.0288346	0.000859021	0.122699	0.114865
701.962	0.0291135	0.00083618	0.114879	0.105279
702.444	0.0294114	0.000801589	0.107342	0.0960364
702.926	0.0297322	0.000763516	0.100143	0.0872157
703.408	0.0300784	0.000731055	0.0933219	0.0788727
703.89	0.0304498	0.000712701	0.0869026	0.071052
704.373	0.0308421	0.000717016	0.0809018	0.0637895
704.855	0.0312481	0.000749874	0.0753247	0.0571049
705.337	0.0316584	0.000813506	0.0701702	0.0510073
705.819	0.0320641	0.000905237	0.0654332	0.0454937
706.301	0.0324598	0.00101818	0.0611059	0.0405494
706.783	0.0328444	0.00114161	0.0571792	0.0361503
707.265	0.0332216	0.00126421	0.0536424	0.0322638
707.747	0.0335988	0.00137744	0.0504822	0.0288531
708.23	0.0339847	0.00147598	0.0476818	0.0258773
708.712	0.0343885	0.00155873	0.0452215	0.0232939
709.194	0.0348166	0.00162791	0.0430813	0.0210628
709.676	0.035274	0.00168711	0.041241	0.0191434
710.158	0.0357625	0.00174097	0.0396821	0.0174979
710.64	0.0362813	0.00179496	0.03839	0.0160936
711.122	0.0368259	0.00185479	0.03735	0.0149
711.604	0.0373888	0.00192707	0.0365466	0.0138908
712.086	0.0379596	0.00201667	0.0359625	0.0130425
712.569	0.0385257	0.00212477	0.0355735	0.0123296
713.051	0.0390744	0.00224606	0.0353509	0.0117241
713.533	0.0395953	0.00236894	0.0352647	0.0111965
714.015	0.0400823	0.00247669	0.0352836	0.0107148
714.497	0.0405346	0.00255378	0.0353825	0.0102541
714.979	0.0409559	0.00259124	0.0355435	0.00979938
715.461	0.0413529	0.00259044	0.0357564	0.0093503
715.943	0.0417328	0.00256391	0.0360179	0.00891818
716.426	0.0421015	0.00253071	0.0363275	0.00852272
716.908	0.0424626	0.00251128	0.0366847	0.00818315
717.39	0.0428181	0.00251932	0.0370871	0.00790968
717.872	0.0431687	0.00255921	0.0375289	0.00770137
718.354	0.0435139	0.00262591	0.0380027	0.00754585
718.836	0.0438532	0.00271012	0.0385007	0.0074251
719.318	0.0441849	0.00280239	0.0390163	0.00732133
719.8	0.0445062	0.00289798	0.039545	0.0072215
720.283	0.0448144	0.00299705	0.040084	0.00711903
720.764	0.0451073	0.00310263	0.0406322	0.00701106
721.247	0.0453848	0.00321527	0.0411895	0.00689466
721.729	0.0456498	0.00333142	0.0417567	0.00676508
722.211	0.0459082	0.00344238	0.0423359	0.00661581
722.693	0.0461673	0.00353828	0.0429298	0.00644313
723.175	0.0464343	0.00361254	0.0435415	0.0062496
723.657	0.0467156	0.00366447	0.0441735	0.00604692
724.139	0.0470158	0.00370079	0.0448273	0.00585407
724.621	0.0473387	0.00373281	0.0455038	0.00569162
725.104	0.0476881	0.00377381	0.0462037	0.00557766
725.586	0.0480685	0.00383365	0.0469287	0.00552028
726.068	0.0484843	0.00391779	0.0476819	0.00551662
726.55	0.0489395	0.00402747	0.0484668	0.00555451
727.032	0.0494351	0.00416066	0.0492855	0.00561787
727.514	0.0499689	0.00431477	0.0501364	0.00569031
727.996	0.0505354	0.00448625	0.0510118	0.00575874
728.478	0.051128	0.00467072	0.0519	0.00581495
728.961	0.0517402	0.00486173	0.052786	0.00585518
729.443	0.0523682	0.00505015	0.0536554	0.00587986
729.925	0.0530094	0.00522701	0.0544989	0.0058943
730.407	0.0536623	0.00538523	0.0553125	0.00590912
730.889	0.054322	0.00552239	0.0560981	0.00594096
731.371	0.0549807	0.00564171	0.0568599	0.00600838
731.853	0.0556263	0.00575068	0.0576031	0.00612988
732.335	0.0562452	0.0058576	0.0583306	0.00631717
732.817	0.0568269	0.0059674	0.059044	0.00657238
733.3	0.0573671	0.00608065	0.0597435	0.00688685
733.782	0.0578693	0.00619373	0.0604306	0.00724562
734.264	0.0583438	0.00630308	0.0611074	0.00763487
734.746	0.0588069	0.00640819	0.0617778	0.00804606
735.228	0.0592749	0.00651459	0.0624446	0.00848048
735.71	0.0597631	0.00663132	0.0631088	0.00894673
736.192	0.0602837	0.00676938	0.0637696	0.00945736
736.674	0.060847	0.00693479	0.0644246	0.0100215
737.157	0.0614596	0.00712553	0.065071	0.0106416
737.639	0.0621262	0.00733097	0.0657064	0.0113135
738.121	0.0628477	0.00753523	0.0663295	0.0120301
738.603	0.0636194	0.00772272	0.0669387	0.0127863
739.085	0.0644305	0.00788367	0.0675326	0.0135839
739.567	0.0652653	0.00801761	0.0681095	0.0144313
740.049	0.0661064	0.00813285	0.0686685	0.0153417
740.531	0.0669367	0.00824478	0.0692124	0.01633
741.013	0.067745	0.0083692	0.0697468	0.0174057
741.496	0.0685259	0.00851991	0.0702813	0.018573
741.978	0.0692802	0.00870573	0.070826	0.0198282
742.46	0.0700109	0.00892978	0.0713868	0.0211619
742.942	0.0707226	0.0091905	0.0719623	0.0225572
743.424	0.0714195	0.00948262	0.0725422	0.023989
743.906	0.0721056	0.00979816	0.0731086	0.0254265
744.388	0.0727865	0.0101257	0.0736391	0.026829
744.87	0.07347	0.0104513	0.0741107	0.0281517
745.352	0.0741655	0.0107615	0.0745054	0.0293543
745.835	0.0748826	0.0110431	0.0748089	0.030402
746.317	0.0756277	0.011288	0.0750125	0.0312759
746.799	0.0764038	0.0114935	0.075111	0.0319726
747.281	0.07721	0.0116639	0.0751027	0.032504
747.763	0.0780451	0.0118087	0.0749913	0.0328928
748.245	0.0789101	0.0119401	0.0747867	0.0331659
748.727	0.0798114	0.012072	0.0745064	0.0333527
749.21	0.0807592	0.0122169	0.0741736	0.0334804
749.692	0.0817655	0.0123865	0.0738125	0.0335743
750.174	0.0828407	0.0125924	0.0734463	0.0336608
750.656	0.0839899	0.0128451	0.0730903	0.0337654
751.138	0.0852118	0.0131552	0.0727522	0.0339129
751.62	0.0865009	0.0135309	0.0724339	0.0341249
752.102	0.0878498	0.0139753	0.072134	0.0344134
752.584	0.0892515	0.0144842	0.0718508	0.0347789
753.066	0.0906998	0.0150441	0.0715837	0.0352066
753.548	0.0921887	0.0156351	0.0713318	0.0356708
754.031	0.0937091	0.0162314	0.0710916	0.0361361
754.513	0.0952491	0.0168064	0.0708544	0.036564
754.995	0.0967955	0.0173393	0.0706082	0.0369212
755.477	0.0983366	0.0178169	0.0703375	0.0371812
755.959	0.0998653	0.018238	0.0700288	0.037329
756.441	0.10138	0.0186125	0.0696749	0.0373614
756.923	0.102884	0.01896	0.0692746	0.0372854
757.405	0.104377	0.0193047	0.0688321	0.0371147
757.888	0.105852	0.0196686	0.0683523	0.0368645
758.37	0.107291	0.0200686	0.0678373	0.0365492
758.852	0.108672	0.0205115	0.067284	0.0361777
759.334	0.10997	0.0209938	0.066685	0.0357535
759.816	0.11117	0.0215035	0.0660314	0.0352748
760.298	0.112268	0.022025	0.065317	0.0347378
760.78	0.113275	0.0225434	0.0645415	0.0341395
761.262	0.11421	0.0230467	0.0637102	0.0334802
761.745	0.11509	0.0235292	0.0628327	0.0327653
762.227	0.115929	0.0239896	0.0619198	0.0320044
762.709	0.116732	0.0244294	0.0609814	0.031209
763.191	0.117501	0.0248505	0.0600234	0.0303892
763.673	0.118238	0.0252542	0.0590495	0.0295506
764.155	0.118947	0.0256413	0.0580601	0.0286938
764.637	0.119637	0.026013	0.0570544	0.0278151
765.119	0.120314	0.0263721	0.0560303	0.0269103
765.601	0.120979	0.0267238	0.0549845	0.0259771
766.083	0.121623	0.0270754	0.0539124	0.0250176
766.566	0.122232	0.0274352	0.052808	0.0240395
767.048	0.122791	0.0278115	0.0516646	0.0230535
767.53	0.123294	0.0282117	0.050477	0.02207
768.012	0.123742	0.0286411	0.0492419	0.0210972
768.494	0.124143	0.029103	0.047959	0.020139
768.976	0.124511	0.0295984	0.0466314	0.0191953
769.458	0.124851	0.0301251	0.0452658	0.0182648
769.94	0.125162	0.0306772	0.043871	0.0173464
770.423	0.125435	0.0312456	0.0424565	0.0164407
770.905	0.125662	0.031819	0.041033	0.0155505
771.387	0.125835	0.032386	0.0396098	0.0146797
771.869	0.125961	0.0329385	0.0381947	0.0138313
772.351	0.126047	0.0334733	0.0367943	0.0130079
772.833	0.126106	0.0339928	0.0354131	0.0122107
773.315	0.126143	0.0345034	0.0340544	0.011441
773.797	0.126156	0.0350128	0.0327218	0.0107002
774.279	0.126136	0.035526	0.0314188	0.00998989
774.762	0.126073	0.0360439	0.0301489	0.00931062
775.244	0.125965	0.0365624	0.0289154	0.00866166
775.726	0.125812	0.0370741	0.0277211	0.00804079
776.208	0.125621	0.0375701	0.0265676	0.00744515
776.69	0.125394	0.0380416	0.0254562	0.00687302
777.172	0.125124	0.0384815	0.0243882	0.00632544
777.654	0.124793	0.0388828	0.0233655	0.00580561
778.136	0.124379	0.0392381	0.0223913	0.00531854
778.619	0.12386	0.0395402	0.0214686	0.00486786
779.101	0.123228	0.039781	0.0205997	0.00445391
779.583	0.122484	0.0399544	0.0197851	0.00407329
780.065	0.121643	0.0400567	0.0190223	0.00371997
780.547	0.120718	0.040087	0.0183059	0.00338688
781.029	0.119719	0.0400475	0.0176292	0.00306929
781.511	0.118642	0.0399408	0.016985	0.00276534
781.993	0.117476	0.0397697	0.0163667	0.00247519
782.476	0.116211	0.0395357	0.0157697	0.0021992
782.958	0.114841	0.0392399	0.0151914	0.00193639
783.44	0.113372	0.0388847	0.0146313	0.00168292
783.922	0.111817	0.0384737	0.0140908	0.00143409
784.404	0.110195	0.0380126	0.0135725	0.00118653
784.886	0.108519	0.0375077	0.0130804	0.000940334
785.368	0.106796	0.0369636	0.0126177	0.000699393
785.85	0.105032	0.0363813	0.0121863	0.000469697
786.332	0.10323	0.0357582	0.0117854	0.000257263
786.815	0.101401	0.0350881	0.0114112	6.39534e-05
787.297	0.0995573	0.0343655	0.0110571	-0.000112807
787.779	0.0977175	0.0335878	0.010716	-0.000278866
788.261	0.0958936	0.0327596	0.0103827	-0.000439367
788.743	0.0940904	0.0318932	0.0100551	-0.000596103
789.225	0.0923028	0.0310075	0.00973645	-0.000745141
789.707	0.0905207	0.0301217	0.00943234	-0.000878621
790.189	0.0887339	0.0292538	0.00914975	-0.000987827
790.672	0.0869375	0.0284145	0.00889349	-0.00106762
791.154	0.0851343	0.0276058	0.00866351	-0.00111905
791.636	0.0833324	0.0268219	0.00845399	-0.00114998
792.118	0.0815412	0.0260529	0.00825552	-0.00117173
792.6	0.0797666	0.0252889	0.0080573	-0.00119397
793.082	0.0780111	0.0245227	0.00785033	-0.00122232
793.564	0.0762743	0.0237514	0.00763028	-0.00125638
794.046	0.0745561	0.0229763	0.00739861	-0.00129094
794.528	0.0728594	0.0222005	0.00716167	-0.00131948
795.01	0.0711891	0.021427	0.00692917	-0.00133811
795.493	0.0695497	0.0206569	0.00670958	-0.00134851
795.975	0.0679426	0.0198896	0.00650928	-0.00135793
796.457	0.0663634	0.0191241	0.00632988	-0.00137672
796.939	0.0648053	0.0183601	0.00616789	-0.00141553
797.421	0.063262	0.0175992	0.00601591	-0.00148214
797.903	0.0617327	0.0168456	0.00586492	-0.00157888
798.385	0.0602244	0.016106	0.0057073	-0.00170148
798.867	0.0587506	0.0153894	0.00553883	-0.00183971
799.35	0.0573261	0.0147054	0.0053606	-0.00198031
799.832	0.0559619	0.0140645	0.00517919	-0.002108
800.314	0.0546614	0.0134756	0.00500466	-0.00220912
800.796	0.0534199	0.0129439	0.00484742	-0.00227491
801.278	0.052227	0.0124689	0.00471553	-0.0023026
801.76	0.051071	0.0120418	0.00461104	-0.00229729
802.242	0.0499435	0.0116483	0.00452997	-0.00226881
802.724	0.0488394	0.0112676	0.00446214	-0.00223111
803.207	0.0477571	0.0108791	0.00439392	-0.00219784
803.689	0.0466954	0.0104679	0.00431297	-0.00217823
804.171	0.045652	0.0100261	0.00420843	-0.00217717
804.653	0.0446237	0.00955625	0.00407543	-0.00219448
805.135	0.0436076	0.00906878	0.00391438	-0.00222669
805.617	0.0426028	0.00857885	0.0037307	-0.00226964
806.099	0.0416111	0.00810172	0.00353333	-0.00231974
806.581	0.0406358	0.00764869	0.00333272	-0.00237428
807.063	0.0396799	0.00722649	0.00314024	-0.00242993
807.545	0.0387436	0.00683643	0.00296619	-0.00248252
808.028	0.037824	0.00647665	0.00281793	-0.0025261
808.51	0.0369163	0.00614285	0.00269949	-0.0025545
808.992	0.0360168	0.00583083	0.00261051	-0.00256336
809.474	0.0351245	0.00553665	0.00254621	-0.00255133
809.956	0.0342417	0.00525753	0.00249876	-0.00252116
810.438	0.0333725	0.0049927	0.00245993	-0.00247777
810.92	0.03252	0.0047432	0.00242315	-0.00242644
811.403	0.0316842	0.00451253	0.00238526	-0.00236989
811.885	0.0308622	0.0043038	0.00234668	-0.00230827
812.367	0.03005	0.00411851	0.00231034	-0.00224004
812.849	0.0292469	0.0039529	0.0022779	-0.0021654
813.331	0.0284572	0.00379841	0.00224836	-0.00208851
813.813	0.0276914	0.00364068	0.00221675	-0.00201843
814.295	0.0269629	0.00346369	0.00217436	-0.00196784
814.777	0.0262828	0.0032558	0.00211285	-0.00194729
815.26	0.0256565	0.00301167	0.00202573	-0.00196362
815.742	0.0250805	0.002736	0.00191196	-0.00201494
816.224	0.0245453	0.00244101	0.00177553	-0.00209306
816.706	0.024037	0.00214375	0.00162545	-0.00218482
817.188	0.0235439	0.00186021	0.00147225	-0.00227696
817.67	0.0230593	0.00160127	0.00132606	-0.00236008
818.152	0.0225816	0.00137209	0.0011949	-0.00242911
818.634	0.0221138	0.00117247	0.00108331	-0.00248318
819.116	0.0216589	0.00100024	0.000993433	-0.00252251
819.598	0.0212182	0.000853443	0.000924894	-0.00254626
820.081	0.0207904	0.000731685	0.00087572	-0.00255189
820.563	0.0203732	0.000634516	0.000841658	-0.00253681
821.045	0.0199652	0.000560094	0.000816228	-0.00249958
821.527	0.0195678	0.000503067	0.000791564	-0.00244328
822.009	0.0191859	0.000455766	0.0007595	-0.00237457
822.491	0.018825	0.000409232	0.00071363	-0.00230303
822.973	0.0184892	0.000357332	0.000651606	-0.00223747
823.455	0.0181788	0.000298541	0.000575754	-0.00218413
823.938	0.0178892	0.000235382	0.000492552	-0.00214539
824.42	0.0176131	0.000172265	0.000409299	-0.00212046
824.902	0.0173415	0.000112604	0.000332462	-0.00210711
825.384	0.0170678	5.57019e-05	0.000264954	-0.00210315
825.866	0.0167889	-3.14772e-06	0.00020538	-0.00210678
826.348	0.0165047	-7.1398e-05	0.000149261	-0.00211661
826.83	0.0162165	-0.00015504	9.20893e-05	-0.00212996
827.312	0.0159254	-0.000256547	3.14122e-05	-0.00214278
827.794	0.0156314	-0.000372797	-3.17744e-05	-0.00214948
828.277	0.015333	-0.000496925	-9.24673e-05	-0.00214503
828.759	0.0150293	-0.000621282	-0.000145136	-0.00212689
829.241	0.0147207	-0.000739816	-0.000183921	-0.0020961
829.723	0.0144103	-0.00084995	-0.00020631	-0.00205659
830.205	0.0141025	-0.000952189	-0.000213033	-0.00201355
830.687	0.0138032	-0.00104779	-0.000207105	-0.00197067
831.169	0.0135172	-0.00113696	-0.000193327	-0.00192898
831.651	0.0132469	-0.00121815	-0.000175045	-0.00188557
832.134	0.012993	-0.00128866	-0.00015504	-0.00183687
832.616	0.0127539	-0.00134647	-0.000133609	-0.00177867
833.098	0.0125271	-0.00139271	-0.000110157	-0.00171002
833.58	0.0123101	-0.00143188	-8.35891e-05	-0.00163249
834.062	0.0121008	-0.00147025	-5.27462e-05	-0.00154936
834.544	0.0118973	-0.00151407	-1.74613e-05	-0.00146411
835.026	0.0116989	-0.00156765	2.22335e-05	-0.0013792
835.508	0.0115044	-0.00163117	6.56766e-05	-0.00129454
835.99	0.0113135	-0.00170207	0.000112206	-0.00120953
836.473	0.011126	-0.00177606	0.000161592	-0.00112279
836.955	0.0109423	-0.00184888	0.000214264	-0.00103401
837.437	0.0107629	-0.00191724	0.000271552	-0.000943361
837.919	0.0105881	-0.00197836	0.000335048	-0.000851835
838.401	0.010418	-0.00202994	0.000405651	-0.00075986
838.883	0.0102519	-0.00206991	0.000482534	-0.000667866
839.365	0.010089	-0.00209692	0.000561886	-0.000577275
839.847	0.00992842	-0.00211239	0.000637071	-0.000491365
840.33	0.00977129	-0.00212102	0.000698563	-0.000416097
840.812	0.00961919	-0.00213108	0.000737062	-0.000359654
841.294	0.00947551	-0.00215132	0.000745924	-0.000329459
841.776	0.00934366	-0.00218858	0.000723089	-0.000330817
842.258	0.0092263	-0.0022439	0.000672246	-0.000364123
842.74	0.0091238	-0.0023115	0.000601733	-0.000424736
843.222	0.00903478	-0.00238047	0.000521744	-0.000504702
843.704	0.00895633	-0.00243899	0.000440707	-0.000596003
844.187	0.00888396	-0.00247955	0.000362638	-0.000693207
844.669	0.00881369	-0.00250083	0.000287002	-0.000793729
845.151	0.00874265	-0.00250854	0.000209524	-0.000898196
845.633	0.00866889	-0.00251157	0.000125563	-0.00100657
846.115	0.0085921	-0.00251813	3.24394e-05	-0.00111677
846.597	0.00851262	-0.00253038	-6.80851e-05	-0.00122357
847.079	0.00843176	-0.00254461	-0.000170342	-0.00131988
847.561	0.00835093	-0.00255282	-0.000266349	-0.00139971
848.043	0.00827129	-0.00254741	-0.000349324	-0.0014615
848.525	0.00819504	-0.00252521	-0.000415335	-0.00150905
849.008	0.00812414	-0.0024893	-0.000464721	-0.00155111
849.49	0.0080598	-0.00244769	-0.000500665	-0.00159651
849.972	0.0080034	-0.00240997	-0.000528795	-0.00165174
850.454	0.0079551	-0.00238308	-0.000554442	-0.00171798
850.936	0.00791444	-0.00236907	-0.000581643	-0.00179153
851.418	0.00787979	-0.00236568	-0.000613739	-0.00186577
851.9	0.00784888	-0.00236904	-0.000653144	-0.00193594
852.382	0.0078194	-0.00237672	-0.000701246	-0.00200066
852.865	0.00778866	-0.00239019	-0.000759563	-0.00206338
853.347	0.00775409	-0.00241402	-0.000827099	-0.00212963
853.829	0.00771398	-0.002453	-0.000900841	-0.00220355
854.311	0.00766663	-0.00250983	-0.000975166	-0.00228572
854.793	0.007612	-0.0025818	-0.00104293	-0.00237161
855.275	0.00755087	-0.00266177	-0.00109773	-0.00245336
855.757	0.00748523	-0.00273961	-0.00113574	-0.00252281
856.239	0.00741738	-0.00280628	-0.00115748	-0.00257479
856.721	0.00734977	-0.00285668	-0.0011677	-0.00260927
857.204	0.00728396	-0.00289035	-0.00117384	-0.00263074
857.686	0.00722086	-0.00291079	-0.00118329	-0.00264589
858.168	0.00715955	-0.00292333	-0.0012012	-0.0026619
858.65	0.00709973	-0.00293314	-0.00122912	-0.00268363
859.132	0.00704076	-0.00294337	-0.00126477	-0.00271281
859.614	0.00698335	-0.00295535	-0.00130342	-0.00274857
860.096	0.00692944	-0.00296921	-0.00133969	-0.00278801
860.578	0.00688154	-0.00298411	-0.00136893	-0.00282699
861.061	0.00684229	-0.00299856	-0.00138805	-0.00286037
861.543	0.00681337	-0.00301044	-0.00139608	-0.00288235
862.025	0.00679382	-0.00301682	-0.00139291	-0.00288811
862.507	0.00678133	-0.00301449	-0.00137996	-0.00287412
862.989	0.00677248	-0.00300142	-0.00135941	-0.00284048
863.471	0.00676386	-0.00297835	-0.00133378	-0.0027914
863.953	0.00675326	-0.00294976	-0.00130663	-0.00273553
864.435	0.00674061	-0.00292287	-0.00128093	-0.00268294
864.918	0.00672782	-0.00290487	-0.00125919	-0.00264191
865.4	0.00671789	-0.00290092	-0.0012425	-0.00261642
865.882	0.00671376	-0.00291063	-0.00123044	-0.00260486
866.364	0.00671675	-0.00292869	-0.00122159	-0.00260048
866.846	0.00672607	-0.00294525	-0.00121432	-0.00259481
867.328	0.00673893	-0.00295147	-0.00120788	-0.00258137
867.81	0.00675148	-0.00294206	-0.00120269	-0.00255874
868.292	0.00675996	-0.00291767	-0.00120028	-0.00253078
868.774	0.00676225	-0.00288476	-0.00120239	-0.00250495
869.256	0.00675888	-0.00285266	-0.00120993	-0.00248934
869.739	0.00675279	-0.00282969	-0.00122139	-0.00248911
870.221	0.00674832	-0.00281919	-0.00123385	-0.0025038
870.703	0.00674997	-0.00281866	-0.0012423	-0.00252827
871.185	0.00676094	-0.00282007	-0.00124121	-0.00255301
871.667	0.00678194	-0.00281362	-0.00122625	-0.00256876
872.149	0.00681149	-0.00279104	-0.00119443	-0.00256774
872.631	0.00684609	-0.00274824	-0.00114582	-0.00254626
873.114	0.00688278	-0.00268719	-0.00108303	-0.00250508
873.596	0.00691897	-0.00261513	-0.00101163	-0.00244934
874.078	0.00695486	-0.00254201	-0.000938534	-0.00238673
874.56	0.00699267	-0.00247771	-0.000871544	-0.00232574
875.042	0.00703608	-0.0024299	-0.00081688	-0.00227383
875.524	0.00708919	-0.00240127	-0.000778217	-0.00223549
876.006	0.00715409	-0.00239049	-0.000755329	-0.00221083
876.488	0.0072308	-0.00239095	-0.000743884	-0.0021958
876.97	0.00731668	-0.00239415	-0.000736442	-0.00218261
877.452	0.00740764	-0.00239158	-0.000725394	-0.00216349
877.935	0.00749889	-0.00237659	-0.000703925	-0.00213227
878.417	0.00758729	-0.00234729	-0.000669719	-0.00208732
878.899	0.00767193	-0.00230632	-0.000624293	-0.00203232
879.381	0.00775392	-0.00225965	-0.000572179	-0.00197427
879.863	0.00783603	-0.00221452	-0.000518602	-0.00192067
880.345	0.00792119	-0.00217631	-0.000467137	-0.0018761
880.827	0.0080115	-0.00214694	-0.00041848	-0.00184053
881.309	0.00810682	-0.00212366	-0.000370115	-0.00180922
881.792	0.00820534	-0.00210134	-0.000318633	-0.0017751
882.274	0.00830411	-0.00207404	-0.000261515	-0.0017323
882.756	0.00840001	-0.00203905	-0.000199156	-0.00167959
883.238	0.00849059	-0.00199769	-0.000135464	-0.00162071
883.72	0.00857483	-0.00195553	-7.6036e-05	-0.00156343
884.202	0.00865293	-0.00191994	-2.66058e-05	-0.00151598
884.684	0.00872568	-0.00189804	9.31076e-06	-0.00148409
885.166	0.00879387	-0.00189296	3.1611e-05	-0.00146883
885.649	0.00885744	-0.00190361	4.33415e-05	-0.00146665
886.131	0.00891558	-0.0019245	4.89749e-05	-0.00147084
886.613	0.00896662	-0.00194798	5.32497e-05	-0.00147471
887.095	0.0090089	-0.00196718	5.89495e-05	-0.00147378
887.577	0.00904077	-0.00197664	6.78638e-05	-0.00146543
888.059	0.00906114	-0.00197397	8.06226e-05	-0.00144895
888.541	0.00907027	-0.00195916	9.7657e-05	-0.00142464
889.023	0.00906902	-0.00193413	0.000119597	-0.00139231
889.505	0.00905924	-0.0019018	0.000147107	-0.00135182
889.987	0.00904307	-0.00186541	0.000180287	-0.00130346
890.47	0.00902257	-0.00182918	0.000217248	-0.00124931
890.952	0.00899946	-0.00179701	0.000255472	-0.00119304
891.434	0.00897379	-0.00177263	0.000291412	-0.00113812
891.916	0.00894436	-0.00175807	0.000322978	-0.00108709
892.398	0.00890895	-0.00175339	0.000349904	-0.00103946
892.88	0.00886424	-0.00175669	0.000374576	-0.000991695
893.362	0.00880719	-0.00176451	0.000401273	-0.000938236
893.845	0.00873555	-0.00177348	0.000434207	-0.000873859
894.327	0.00864932	-0.00178164	0.000477028	-0.000795118
894.809	0.00855026	-0.00178979	0.000531132	-0.00070204
895.291	0.0084417	-0.00180035	0.000596192	-0.000596401
895.773	0.00832772	-0.00181681	0.000671516	-0.000480178
896.255	0.00821233	-0.00184136	0.00075711	-0.000353198
896.737	0.00809798	-0.00187429	0.000854207	-0.000212172
897.219	0.00798571	-0.00191315	0.000965505	-5.10566e-05
897.701	0.00787503	-0.00195399	0.00109397	0.000136998
898.183	0.00776441	-0.00199251	0.00124145	0.000356337
898.666	0.00765149	-0.00202612	0.00140782	0.00060827
899.148	0.00753455	-0.00205352	0.00159142	0.000889897
899.63	0.00741253	-0.00207585	0.00178881	0.00119563
900.112	0.00728555	-0.00209481	0.0019962	0.00151817
900.594	0.0071548	-0.00211248	0.00220972	0.00185053
901.076	0.0070219	-0.00213052	0.00242584	0.00218661
901.558	0.00688857	-0.0021507	0.00264018	0.00252008
902.04	0.00675549	-0.00217503	0.00284778	0.00284381
902.523	0.00662267	-0.00220579	0.00304316	0.00315079
903.005	0.00648822	-0.00224511	0.00322018	0.0034328
903.487	0.00634958	-0.0022935	0.00337412	0.00368301
903.969	0.00620412	-0.00234927	0.00350207	0.00389703
904.451	0.00604961	-0.00240815	0.00360276	0.00407249
904.933	0.0058854	-0.0024639	0.0036769	0.00420974
905.415	0.00571284	-0.00251035	0.00372535	0.00430952
905.897	0.00553497	-0.00254303	0.00374845	0.0043726
906.38	0.00535604	-0.00256145	0.00374514	0.00439781
906.862	0.0051808	-0.00256846	0.00371342	0.00438325
907.344	0.00501291	-0.00257011	0.0036505	0.00432659
907.826	0.00485503	-0.00257232	0.00355505	0.00422704
908.308	0.00470769	-0.00258025	0.00342715	0.00408607
908.79	0.00457032	-0.00259626	0.00326878	0.00390776
909.272	0.00444099	-0.00262001	0.00308381	0.00369792
909.754	0.00431735	-0.00264925	0.00287723	0.00346319
910.236	0.00419709	-0.0026809	0.00265401	0.00320973
910.719	0.00407874	-0.00271228	0.00241925	0.00294271
911.201	0.00396126	-0.00274165	0.00217768	0.00266668
911.683	0.00384495	-0.00276819	0.00193416	0.00238586
912.165	0.00373037	-0.00279166	0.00169327	0.0021047
912.647	0.00361899	-0.00281197	0.00145962	0.00182807
913.129	0.00351199	-0.00282972	0.00123667	0.00156017
913.611	0.00341049	-0.00284568	0.00102618	0.00130459
914.093	0.00331529	-0.00286099	0.000828644	0.00106341
914.576	0.00322669	-0.00287689	0.000643111	0.000837309
915.058	0.00314528	-0.002894	0.000468403	0.00062642
915.54	0.00307136	-0.00291224	0.000304144	0.000430757
916.022	0.00300543	-0.00293073	0.000150952	0.000250632
916.504	0.00294771	-0.00294801	1.05699e-05	8.62896e-05
916.986	0.00289767	-0.00296282	-0.000114761	-6.22213e-05
917.468	0.00285398	-0.00297454	-0.000223498	-0.000195248
917.95	0.00281456	-0.00298355	-0.000315553	-0.000314295
918.433	0.00277614	-0.00298997	-0.000391567	-0.000420433
918.915	0.00273613	-0.00299435	-0.000453633	-0.000514201
919.397	0.00269225	-0.00299589	-0.000504074	-0.000595276
919.879	0.00264358	-0.00299306	-0.000544978	-0.00066254
920.361	0.00259104	-0.00298464	-0.000578566	-0.000715569
920.843	0.00253618	-0.00296986	-0.000607055	-0.000755528
921.325	0.00248139	-0.00294956	-0.000632797	-0.00078513
921.807	0.00242874	-0.00292606	-0.00065857	-0.000809174
922.289	0.00237977	-0.00290246	-0.000686326	-0.000832324
922.771	0.00233493	-0.00288146	-0.000717025	-0.000857424
923.254	0.00229419	-0.00286445	-0.000750301	-0.00088487
923.736	0.00225708	-0.00285108	-0.000784105	-0.00091162
924.218	0.00222324	-0.00284029	-0.000815987	-0.000933905
924.7	0.00219224	-0.00283074	-0.000843833	-0.000948089
925.182	0.00216396	-0.00282248	-0.000866882	-0.000953147
925.664	0.00213779	-0.00281609	-0.000885366	-0.000950734
926.146	0.00211312	-0.00281349	-0.000900841	-0.00094432
926.628	0.00208898	-0.00281589	-0.000914464	-0.00093817
927.111	0.00206438	-0.00282323	-0.000926466	-0.000934567
927.593	0.00203835	-0.00283383	-0.000935657	-0.000933277
928.075	0.00201005	-0.00284476	-0.000940088	-0.000931657
928.557	0.00197929	-0.00285286	-0.000937707	-0.000926135
929.039	0.00194627	-0.00285615	-0.000927888	-0.00091324
929.521	0.00191123	-0.00285395	-0.000910992	-0.000890954
930.003	0.00187485	-0.00284641	-0.000888838	-0.000858714
930.485	0.00183772	-0.00283439	-0.000863939	-0.000816913
930.967	0.00180085	-0.00281836	-0.000838111	-0.000766443
931.45	0.00176479	-0.00279769	-0.000811952	-0.000707134
931.932	0.00173036	-0.00277161	-0.000785295	-0.000638851
932.414	0.00169819	-0.00273987	-0.000756983	-0.000561425
932.896	0.00166868	-0.00270342	-0.000726287	-0.000475478
933.378	0.00164211	-0.00266483	-0.000692612	-0.000382629
933.86	0.00161853	-0.00262722	-0.000655658	-0.000285323
934.342	0.00159818	-0.00259333	-0.000615459	-0.000186405
934.824	0.00158105	-0.00256507	-0.00057165	-8.84589e-05
935.307	0.00156775	-0.00254267	-0.0005236	6.09671e-06
935.789	0.0015578	-0.00252594	-0.000471539	9.51383e-05
936.271	0.00155059	-0.00251391	-0.000415997	0.000176508
936.753	0.00154497	-0.00250637	-0.000359058	0.000247946
937.235	0.00153912	-0.00250357	-0.000303534	0.000308554
937.717	0.00153127	-0.00250498	-0.000252209	0.000359322
938.199	0.00152053	-0.00250943	-0.000207237	0.000403064
938.681	0.0015069	-0.00251365	-0.000168487	0.00044492
939.163	0.00149134	-0.00251319	-0.000134238	0.000490561
939.646	0.00147548	-0.00250406	-0.00010214	0.000543971
940.128	0.00146028	-0.002484	-6.97416e-05	0.000605881
940.61	0.00144632	-0.00245418	-3.66116e-05	0.000672512
941.092	0.00143223	-0.00241857	-3.94293e-06	0.000737095
941.574	0.00141624	-0.00238318	2.49507e-05	0.000791431
942.056	0.00139609	-0.00235411	4.61913e-05	0.000828312
942.538	0.0013703	-0.00233503	5.66629e-05	0.000844313
943.02	0.00133872	-0.00232686	5.48734e-05	0.000839964
943.503	0.00130313	-0.00232778	4.13201e-05	0.000819382
943.985	0.00126557	-0.00233453	1.80584e-05	0.000788477
944.467	0.00122899	-0.00234386	-1.21269e-05	0.000753425
944.949	0.00119516	-0.00235316	-4.6087e-05	0.00071914
945.431	0.00116486	-0.0023608	-8.15683e-05	0.000689138
945.913	0.00113769	-0.00236512	-0.000116318	0.000665842
946.395	0.00111284	-0.00236403	-0.000148548	0.000650743
946.877	0.00108945	-0.0023548	-0.000176569	0.00064467
947.36	0.0010669	-0.00233529	-0.000198924	0.000647259
947.842	0.00104528	-0.00230467	-0.000215053	0.000656384
948.324	0.00102465	-0.00226486	-0.000225054	0.000668696
948.806	0.00100489	-0.00222056	-0.000230386	0.000679946
949.288	0.000985696	-0.00217753	-0.000232605	0.000686915
949.77	0.000966202	-0.00214117	-0.000233631	0.000688275
950.252	0.000946046	-0.00211469	-0.00023489	0.000685521
950.734	0.000924894	-0.00209804	-0.000236844	0.000682235
951.216	0.000903178	-0.00208894	-0.000239493	0.000682136
951.698	0.000881497	-0.0020838	-0.000242109	0.000687844
952.181	0.000860382	-0.00207977	-0.000244295	0.000699293
952.663	0.000839898	-0.00207585	-0.000245653	0.000713929
953.145	0.000819847	-0.00207249	-0.000245785	0.000727835
953.627	0.000799431	-0.0020708	-0.000243997	0.00073839
954.109	0.000777921	-0.0020713	-0.000239129	0.000744862
954.591	0.000755716	-0.00207347	-0.000229227	0.000749708
955.073	0.000733478	-0.00207532	-0.000212172	0.000757242
955.555	0.000712801	-0.00207466	-0.00018561	0.000772777
956.038	0.000694946	-0.00207024	-0.000147786	0.000800361
956.52	0.000680941	-0.00206131	-9.74694e-05	0.000842587
957.002	0.000670587	-0.00204871	-3.39611e-05	0.000900456
957.484	0.000663253	-0.00203281	4.27781e-05	0.000974006
957.966	0.000657446	-0.00201355	0.000132656	0.00106318
958.448	0.00065217	-0.00198991	0.000234056	0.00116732
958.93	0.000646661	-0.00196088	0.000344068	0.00128495
959.412	0.000640688	-0.00192654	0.000458851	0.00141288
959.894	0.000634384	-0.0018893	0.000572702	0.00154497
960.377	0.000627847	-0.00185367	0.00067968	0.00167344
960.859	0.000620746	-0.00182496	0.0007751	0.00179014
961.341	0.000612749	-0.00180794	0.0008558	0.00188757
961.823	0.000603392	-0.0018047	0.000920843	0.00196138
962.305	0.000592543	-0.00181414	0.00097115	0.00201002
962.787	0.000580465	-0.00183182	0.00100858	0.00203438
963.269	0.000567858	-0.00185228	0.00103491	0.00203748
963.751	0.000555649	-0.00187046	0.00105116	0.00202207
964.234	0.000544468	-0.00188299	0.0010574	0.00199151
964.716	0.000534781	-0.00188897	0.00105322	0.00194857
965.198	0.000526255	-0.00188897	0.0010385	0.00189629
965.68	0.000518957	-0.00188372	0.00101396	0.00183852
966.162	0.000512521	-0.00187399	0.000980615	0.00177836
966.644	0.000507081	-0.00185964	0.000940168	0.00171825
967.126	0.000502868	-0.00184063	0.000893848	0.00165864
967.608	0.000500015	-0.00181767	0.000842089	0.00159808
968.091	0.000498058	-0.001792	0.000785124	0.00153373
968.573	0.000496433	-0.00176603	0.000723289	0.00146331
969.055	0.000493812	-0.00174154	0.000657645	0.00138642
969.537	0.000489434	-0.00171946	0.000591016	0.00130552
970.019	0.000482866	-0.00170002	0.000526886	0.0012256
970.501	0.000474407	-0.00168279	0.000469034	0.00115211
970.983	0.000465219	-0.00166784	0.000420476	0.00108969
971.465	0.000456661	-0.00165669	0.00038217	0.00103983
971.947	0.000450094	-0.0016517	0.000353751	0.0010015
972.43	0.000446346	-0.00165573	0.000333689	0.000971416
972.912	0.000445517	-0.00166966	0.00032079	0.000946676
973.394	0.000447275	-0.00169197	0.000314788	0.000926089
973.876	0.000450691	-0.00171771	0.000316711	0.000910882
974.358	0.000455136	-0.00174009	0.000328582	0.000904241
974.84	0.000459846	-0.00175296	0.000351827	0.000909221
975.322	0.00046429	-0.0017521	0.000386581	0.000927849
975.804	0.000468138	-0.00173732	0.000431255	0.000959229
976.287	0.000471123	-0.00171194	0.00048197	0.00100031
976.769	0.000472915	-0.00168161	0.000534317	0.00104637
977.251	0.000473412	-0.0016515	0.000583916	0.00109304
977.733	0.000472715	-0.00162523	0.000627382	0.00113636
978.215	0.000470825	-0.00160357	0.000662689	0.00117363
978.697	0.000467972	-0.00158548	0.000689304	0.00120354
979.179	0.000464224	-0.00156871	0.000707325	0.00122503
979.661	0.000459547	-0.00155167	0.000717646	0.00123763
980.143	0.000454141	-0.00153368	0.000721297	0.00124165
980.625	0.000448502	-0.0015147	0.000719439	0.00123806
981.108	0.000443626	-0.00149528	0.000713265	0.00122852
981.59	0.000441172	-0.00147573	0.00070374	0.00121517
982.072	0.000442863	-0.00145598	0.000691196	0.00119915
982.554	0.000450459	-0.00143627	0.000675167	0.00118001
983.036	0.000464489	-0.00141685	0.000654758	0.00115646
983.518	0.000484524	-0.00139869	0.000628909	0.0011257
984	0.000509071	-0.00138244	0.000597121	0.00108587
984.482	0.000535976	-0.00136833	0.000559763	0.00103687
984.965	0.000562948	-0.00135509	0.000518559	0.000981179
985.447	0.000588196	-0.00134002	0.000476397	0.000923532
985.929	0.000610825	-0.00132044	0.000435965	0.000869047
986.411	0.000630767	-0.00129407	0.00039978	0.000822104
986.893	0.000648453	-0.00126058	0.000369071	0.000784494
987.375	0.00066468	-0.00122222	0.000343603	0.00075535
987.857	0.000680111	-0.00118276	0.000322779	0.000732183
988.339	0.000695112	-0.00114612	0.000306001	0.000712336
988.822	0.000710411	-0.00111502	0.00029307	0.000694382
989.304	0.000726807	-0.00108993	0.000284682	0.000678784
989.786	0.000744928	-0.00106931	0.000281465	0.000667236
990.268	0.00076554	-0.00105037	0.000283687	0.000661926
990.75	0.000788643	-0.00103034	0.000290981	0.000664315
991.232	0.000813805	-0.00100786	0.000302022	0.000674669
991.714	0.000839566	-0.000982968	0.000315352	0.000692059
992.196	0.000864366	-0.000956453	0.000329975	0.000715356
992.678	0.000886544	-0.000929607	0.000345626	0.000743302
993.16	0.000905104	-0.000903089	0.000363069	0.000775366
993.643	0.00091978	-0.000877463	0.000383464	0.000810585
994.125	0.000931103	-0.00085339	0.000407707	0.000847866
994.607	0.000939604	-0.000831894	0.00043623	0.000885614
995.089	0.000946012	-0.000814896	0.000468801	0.000922503
995.571	0.000950396	-0.000804114	0.000505489	0.000958399
996.053	0.000952587	-0.000800575	0.000546757	0.000995592
996.535	0.000952621	-0.00080332	0.0005946	0.00103887
997.018	0.000950661	-0.000809472	0.000652103	0.0010946
997.5	0.000947772	-0.000814697	0.000722758	0.00116965
997.982	0.00094588	-0.000814995	0.000809158	0.00126827
998.464	0.000946743	-0.000807818	0.00091221	0.00139124
998.946	0.000952322	-0.000792935	0.00103	0.00153523
999.428	0.000963612	-0.000772462	0.00115845	0.0016936
999.91	0.00098025	-0.000749574	0.00129123	0.00185765
1000.39	0.00100087	-0.000727081	0.00142096	0.00201794
1000.87	0.00102362	-0.000706836	0.00154055	0.00216676
1001.36	0.00104617	-0.000688377	0.00164331	0.00229695
1001.84	0.00106643	-0.000670612	0.0017241	0.00240322
1002.32	0.00108314	-0.000652184	0.00178002	0.00248176
1002.8	0.0010956	-0.000632697	0.00181024	0.00253091
1003.28	0.00110414	-0.000612481	0.00181666	0.00255128
1003.77	0.00110939	-0.000592165	0.00180305	0.00254628
1004.25	0.00111234	-0.000571948	0.0017756	0.00252245
1004.73	0.00111414	-0.000551398	0.0017409	0.00248769
1005.21	0.00111563	-0.000529259	0.00170507	0.00244974
1005.7	0.00111732	-0.000504107	0.00167341	0.00241565
1006.18	0.00111935	-0.000475478	0.00164913	0.00238986
1006.66	0.00112154	-0.000443935	0.00163403	0.0023743
1007.14	0.0011238	-0.000411562	0.00162844	0.00236951
1007.62	0.00112619	-0.000380411	0.0016326	0.0023755
1008.11	0.00112928	-0.000352105	0.0016464	0.00239243
1008.59	0.0011341	-0.000327274	0.00167008	0.00242075
1009.07	0.00114184	-0.000305256	0.00170328	0.0024602
1009.55	0.0011535	-0.000285058	0.00174573	0.00250965
1010.03	0.00116945	-0.000266117	0.00179609	0.00256604
1010.52	0.00118938	-0.000249163	0.00185263	0.00262551
1011	0.00121218	-0.000235022	0.00191399	0.00268465
1011.48	0.0012357	-0.000225187	0.00197953	0.0027422
1011.96	0.00125826	-0.000219987	0.00204936	0.00279942
1012.45	0.0012779	-0.000218	0.00212501	0.00286065
1012.93	0.00129339	-0.000216576	0.00220822	0.00293183
1013.41	0.00130409	-0.000213099	0.00230021	0.00301777
1013.89	0.00130987	-0.000205383	0.00240142	0.00312162
1014.37	0.00131117	-0.000193493	0.00251122	0.00324334
1014.86	0.00130891	-0.000179417	0.00262784	0.00338027
1015.34	0.00130442	-0.000166367	0.0027491	0.00352822
1015.82	0.00129944	-0.000157193	0.00287296	0.00368288
1016.3	0.00129535	-0.000153417	0.00299742	0.0038414
1016.78	0.00129349	-0.000154112	0.00312138	0.00400212
1017.27	0.00129415	-0.000156265	0.00324455	0.00416518
1017.75	0.00129681	-0.000156364	0.00336731	0.00433147
1018.23	0.0013005	-0.000150469	0.00349201	0.00450305
1018.71	0.00130376	-0.00013659	0.00362163	0.00468247
1019.2	0.00130562	-0.000114827	0.00376045	0.00487272
1019.68	0.00130602	-8.71338e-05	0.00391365	0.00507717
1020.16	0.00130595	-5.67218e-05	0.00408597	0.00529925
1020.64	0.00130668	-2.78648e-05	0.00428097	0.00554216
1021.12	0.00130951	-4.3074e-06	0.00450208	0.00580944
1021.61	0.00131503	1.12988e-05	0.00475134	0.00610501
1022.09	0.0013221	1.79259e-05	0.00503091	0.00643418
1022.57	0.00132922	1.69318e-05	0.00534323	0.00680344
1023.05	0.0013338	1.17296e-05	0.00569058	0.00721944
1023.53	0.00133457	7.05761e-06	0.00607356	0.00768646
1024.02	0.00133124	8.34986e-06	0.00648917	0.00820324
1024.5	0.0013245	1.90856e-05	0.00692907	0.0087602
1024.98	0.00131698	4.05248e-05	0.00737765	0.00933696
1025.46	0.00131084	7.04818e-05	0.00781336	0.0099035
1025.94	0.00130795	0.000104318	0.00821219	0.0104267
1026.43	0.00130894	0.000135838	0.00854908	0.0108717
1026.91	0.0013136	0.000160067	0.00880364	0.0112103
1027.39	0.00132081	0.000174519	0.0089629	0.0114256
1027.87	0.00132918	0.000179955	0.00902142	0.0115114
1028.36	0.00133763	0.000179723	0.00898123	0.0114719
1028.84	0.0013456	0.000178695	0.0088495	0.0113175
1029.32	0.00135268	0.000180651	0.00863563	0.0110615
1029.8	0.00135866	0.000187579	0.00834931	0.0107154
1030.28	0.00136358	0.000198684	0.00799871	0.0102885
1030.77	0.0013674	0.000211148	0.00759143	0.00978874
1031.25	0.00137063	0.000221723	0.00713573	0.00922434
1031.73	0.00137402	0.000227558	0.00664115	0.00860649
1032.21	0.00137861	0.000227492	0.00612101	0.00795183
1032.69	0.00138539	0.000221889	0.00559025	0.00728016
1033.18	0.00139466	0.000212574	0.005065	0.00661386
1033.66	0.00140623	0.000201866	0.00456091	0.0059759
1034.14	0.00141863	0.000191988	0.00409001	0.00538445
1034.62	0.00143036	0.00018506	0.00366123	0.00485372
1035.11	0.00143987	0.000182673	0.00327917	0.00439172
1035.59	0.00144639	0.000186121	0.00294531	0.00400035
1036.07	0.00145031	0.000195634	0.00265831	0.00367616
1036.55	0.0014526	0.000210983	0.00241538	0.00341176
1037.03	0.0014547	0.000230542	0.00221275	0.00319775
1037.52	0.00145759	0.000251859	0.00204594	0.00302361
1038	0.00146181	0.000272049	0.00191046	0.00288036
1038.48	0.0014667	0.000288727	0.00180192	0.00276177
1038.96	0.00147145	0.000300597	0.00171638	0.00266438
1039.44	0.00147504	0.000308322	0.00165032	0.00258724
1039.93	0.00147641	0.000313627	0.00160104	0.00253052
1040.41	0.00147514	0.000319497	0.00156569	0.00249379
1040.89	0.00147089	0.000328814	0.00154221	0.00247549
1041.37	0.00146378	0.000343172	0.00152838	0.00247253
1041.85	0.0014539	0.000362936	0.00152223	0.00248059
1042.34	0.0014419	0.000387079	0.00152199	0.00249582
1042.82	0.00142847	0.000413113	0.00152595	0.00251502
1043.3	0.00141524	0.000437656	0.0015323	0.00253591
1043.78	0.00140377	0.000457457	0.00153958	0.00255711
1044.27	0.00139556	0.000469962	0.00154656	0.00257761
1044.75	0.00139131	0.000473379	0.00155255	0.00259631
1045.23	0.00139084	0.000468237	0.00155777	0.00261234
1045.71	0.00139257	0.000456595	0.00156313	0.00262541
1046.19	0.00139453	0.000442598	0.00157027	0.00263684
1046.68	0.00139489	0.000430989	0.00158105	0.00264901
1047.16	0.0013925	0.000426412	0.00159708	0.00266535
1047.64	0.00138748	0.000431719	0.00161843	0.00268912
1048.12	0.0013807	0.00044764	0.00164484	0.00272232
1048.6	0.00137382	0.000472284	0.00167484	0.00276537
1049.09	0.0013679	0.000502205	0.001707	0.00281709
1049.57	0.00136342	0.000533819	0.00174037	0.00287586
1050.05	0.00136056	0.00056444	0.00177494	0.00294011
1050.53	0.00135837	0.00059304	0.0018112	0.0030092
1051.02	0.0013565	0.000620115	0.00185033	0.00308347
1051.5	0.00135464	0.000646429	0.00189246	0.0031627
1051.98	0.00135308	0.000672147	0.00193719	0.00324605
1052.46	0.00135245	0.000696074	0.00198309	0.00333152
1052.94	0.00135328	0.000715755	0.00202816	0.00341627
1053.42	0.00135594	0.0007283	0.0020709	0.00349749
1053.91	0.00136079	0.00073225	0.00211102	0.00357419
1054.39	0.0013679	0.000727603	0.00214951	0.00364706
1054.87	0.00137751	0.000716651	0.00218811	0.00371847
1055.35	0.00138988	0.000702944	0.00222924	0.00379163
1055.84	0.001405	0.000690598	0.00227503	0.00386955
1056.32	0.00142249	0.000682103	0.00232663	0.00395357
1056.8	0.00144047	0.000678518	0.00238466	0.00404379
1057.28	0.00145633	0.000679381	0.0024491	0.00413949
1057.76	0.00146717	0.000683164	0.00251978	0.00423998
1058.25	0.00147049	0.000688242	0.00259661	0.00434556
1058.73	0.0014651	0.000693386	0.00267981	0.00445746
1059.21	0.00145227	0.000698065	0.00276917	0.00457762
1059.69	0.00143518	0.000701749	0.00286449	0.00470746
1060.17	0.00141813	0.000704238	0.00296549	0.00484789
1060.66	0.0014054	0.000704836	0.00307146	0.0049988
1061.14	0.00139985	0.000703807	0.00318253	0.00515971
1061.62	0.00140241	0.000701849	0.003299	0.00533045
1062.1	0.00141161	0.000700554	0.00342144	0.00551128
1062.59	0.00142435	0.000701948	0.00355057	0.00570287
1063.07	0.00143691	0.000707856	0.00368639	0.00590522
1063.55	0.00144639	0.000718476	0.0038279	0.00611677
1064.03	0.00145091	0.000732482	0.00397377	0.00633435
1064.51	0.00144998	0.000746787	0.00412189	0.00655264
1065	0.00144466	0.000757939	0.00427064	0.00676592
1065.48	0.00143631	0.000763084	0.00441853	0.0069685
1065.96	0.00142671	0.000760927	0.00456453	0.00715601
1066.44	0.0014167	0.000752197	0.00470719	0.00732595
1066.92	0.00140699	0.00073922	0.00484468	0.00747741
1067.41	0.00139772	0.000724317	0.00497359	0.00761001
1067.89	0.00138855	0.000709349	0.00508967	0.00772386
1068.37	0.0013793	0.000695045	0.00518727	0.00781781
1068.85	0.00136973	0.000680941	0.00526109	0.00789014
1069.34	0.00136033	0.000666041	0.00530576	0.0079383
1069.82	0.00135165	0.000649781	0.0053174	0.00795915
1070.3	0.00134454	0.000632559	0.00529399	0.00795024
1070.78	0.00133955	0.000615005	0.00523486	0.00790918
1071.26	0.00133703	0.000598813	0.00514211	0.00783535
1071.75	0.00133669	0.000584911	0.00501904	0.00772913
1072.23	0.00133756	0.000574228	0.00487121	0.00759342
1072.71	0.00133852	0.000566929	0.00470518	0.00743316
1073.19	0.00133836	0.000563346	0.00452793	0.00725499
1073.67	0.00133633	0.000563246	0.0043461	0.00706719
1074.16	0.00133221	0.000566132	0.00416561	0.00687834
1074.64	0.00132623	0.000570844	0.00399002	0.00669562
1075.12	0.00131915	0.00057529	0.00382155	0.00652451
1075.6	0.0013114	0.000576517	0.00366113	0.00636794
1076.09	0.00130336	0.000571773	0.00350898	0.00622644
1076.57	0.00129505	0.000559199	0.00336558	0.0060993
1077.05	0.00128624	0.000539127	0.00323226	0.00598544
1077.53	0.00127677	0.000513682	0.00311054	0.00588369
1078.01	0.00126704	0.000486581	0.00300146	0.00579285
1078.49	0.00125757	0.000461371	0.00290505	0.00571143
1078.98	0.00124936	0.000440508	0.00281936	0.00563727
1079.46	0.00124251	0.000424257	0.00274096	0.00556713
1079.94	0.00123706	0.000410659	0.00266571	0.00549776
1080.42	0.00123231	0.000397227	0.00259028	0.00542639
1080.91	0.00122703	0.000381673	0.00251279	0.00535198
1081.39	0.00122015	0.000363533	0.00243374	0.00527531
1081.87	0.00121148	0.000343902	0.00235531	0.00519851
1082.35	0.00120151	0.000325001	0.0022807	0.00512424
1082.83	0.00119134	0.000309151	0.00221239	0.0050541
1083.32	0.0011826	0.000297513	0.00215165	0.00498921
1083.8	0.00117666	0.00029002	0.0020987	0.00492905
1084.28	0.00117423	0.000285842	0.00205236	0.00487326
1084.76	0.00117523	0.000283886	0.00201085	0.00482203
1085.24	0.00117878	0.000283687	0.0019726	0.00477643
1085.73	0.0011836	0.000285411	0.00193609	0.00473848
1086.21	0.00118832	0.000289191	0.00189998	0.00470977
1086.69	0.00119177	0.000294562	0.00186308	0.00469054
1087.17	0.00119337	0.000299735	0.00182428	0.00467872
1087.65	0.00119334	0.000302321	0.00178352	0.00467072
1088.14	0.00119204	0.000299801	0.00174127	0.00466174
1088.62	0.00119045	0.000291014	0.00169958	0.00464801
1089.1	0.00118965	0.000276459	0.00166113	0.00462708
1089.58	0.00119091	0.000258622	0.00162874	0.00459908
1090.07	0.0011952	0.000240553	0.00160399	0.00456583
1090.55	0.00120274	0.000224541	0.00158657	0.00453021
1091.03	0.00121337	0.000211447	0.00157456	0.00449522
1091.51	0.0012257	0.000199911	0.00156449	0.00446278
1091.99	0.00123836	0.000187314	0.00155252	0.00443402
1092.48	0.00125002	0.000171668	0.00153649	0.00440925
1092.96	0.00125973	0.000151979	0.00151571	0.0043885
1093.44	0.00126743	0.000129109	0.00149117	0.00437127
1093.92	0.00127368	0.000105379	0.00146507	0.00435714
1094.4	0.00127953	8.36052e-05	0.00143964	0.00434583
1094.89	0.00128601	6.6008e-05	0.00141614	0.00433673
1095.37	0.00129349	5.34485e-05	0.00139523	0.00432973
1095.85	0.00130156	4.59925e-05	0.00137661	0.00432541
1096.33	0.00130941	4.27781e-05	0.00135979	0.00432434
1096.82	0.00131625	4.3474e-05	0.00134424	0.00432749
1097.3	0.00132131	4.71523e-05	0.00132971	0.00433472
1097.78	0.00132473	5.27195e-05	0.00131569	0.00434439
1098.26	0.00132659	5.83861e-05	0.00130163	0.00435349
1098.74	0.00132732	6.11366e-05	0.00128654	0.00435748
1099.23	0.00132735	5.7889e-05	0.00126966	0.00435276
1099.71	0.00132642	4.66221e-05	0.00125089	0.0043375
1100.19	0.00132443	2.73033e-05	0.00123118	0.00431283
1100.67	0.00132117	2.68386e-06	0.00121244	0.00428308
1101.15	0.00131685	-2.24312e-05	0.00119739	0.00425404
1101.64	0.00131237	-4.24095e-05	0.00118802	0.00423182
1102.12	0.00130884	-5.34088e-05	0.00118526	0.00422001
1102.6	0.00130791	-5.41045e-05	0.00118835	0.00421927
1103.08	0.00131037	-4.66502e-05	0.0011952	0.004227
1103.57	0.00131662	-3.50544e-05	0.0012033	0.00423948
1104.05	0.00132616	-2.38558e-05	0.00121081	0.00425263
1104.53	0.00133766	-1.61691e-05	0.00121726	0.00426421
1105.01	0.00134952	-1.28889e-05	0.00122331	0.00427388
1105.49	0.00136009	-1.28889e-05	0.00123062	0.00428295
1105.98	0.00136761	-1.43799e-05	0.00124085	0.00429282
1106.46	0.00137113	-1.60035e-05	0.00125478	0.0043045
1106.94	0.00137023	-1.75938e-05	0.00127202	0.00431752
1107.42	0.00136461	-2.04101e-05	0.0012909	0.0043305
1107.9	0.00135504	-2.56119e-05	0.00130947	0.00434145
1108.39	0.00134264	-3.39611e-05	0.00132596	0.00434897
1108.87	0.00132922	-4.49274e-05	0.00133919	0.00435226
1109.35	0.00131629	-5.73512e-05	0.00134859	0.00435082
1109.83	0.00130542	-6.98741e-05	0.00135471	0.00434479
1110.32	0.00129728	-8.23634e-05	0.0013576	0.00433355
1110.8	0.00129173	-9.55149e-05	0.00135813	0.00431691
1111.28	0.00128797	-0.000110621	0.0013565	0.00429443
1111.76	0.00128478	-0.000128674	0.00135278	0.00426672
1112.24	0.00128119	-0.000149475	0.00134663	0.00423476
1112.72	0.00127717	-0.000170905	0.00133769	0.00420004
1113.21	0.00127335	-0.000190015	0.00132473	0.0041638
1113.69	0.00127096	-0.000204356	0.00130688	0.00412617
1114.17	0.00127112	-0.000212735	0.00128302	0.00408587
1114.65	0.00127435	-0.000216046	0.00125315	0.00404125
1115.14	0.00128049	-0.000216676	0.00121783	0.00399072
1115.62	0.00128841	-0.000217272	0.00117925	0.00393408
1116.1	0.00129658	-0.000219391	0.00114008	0.00387303
1116.58	0.00130366	-0.000223134	0.00110344	0.00381095
1117.07	0.00130894	-0.000226644	0.00107158	0.00375169
1117.55	0.00131203	-0.000227902	0.00104568	0.00369815
1118.03	0.00131333	-0.000225551	0.00102558	0.00365087
1118.51	0.0013131	-0.000220087	0.00101001	0.00360844
1118.99	0.0013113	-0.000213298	0.000997485	0.00356738
1119.47	0.00130771	-0.000208065	0.000986858	0.00352425
1119.96	0.00130193	-0.00020684	0.000977626	0.00347665
1120.44	0.00129336	-0.000210284	0.000970054	0.00342455
1120.92	0.00128236	-0.000218265	0.00096421	0.00336985
1121.4	0.00126963	-0.000229393	0.000959992	0.00331576
1121.89	0.0012565	-0.000242109	0.000956539	0.00326518
1122.37	0.00124471	-0.000255786	0.000952322	0.00322018
1122.85	0.0012353	-0.000270223	0.000945913	0.00318146
1123.33	0.00122896	-0.000285753	0.000936516	0.00314815
1123.81	0.00122587	-0.000302309	0.00092413	0.00311861
1124.3	0.00122523	-0.000319063	0.000909952	0.00309128
1124.78	0.00122643	-0.000334889	0.000895475	0.00306489
1125.26	0.00122839	-0.00034853	0.000882062	0.00303853
1125.74	0.00123022	-0.000359885	0.000870209	0.00301157
1126.22	0.00123145	-0.000369751	0.000859685	0.00298367
1126.71	0.00123168	-0.00038051	0.000849194	0.00295452
1127.19	0.00123058	-0.000393951	0.000837408	0.00292403
1127.67	0.00122869	-0.000411495	0.000823233	0.00289274
1128.15	0.00122597	-0.000432912	0.000806303	0.00286152
1128.63	0.00122317	-0.000456744	0.000787282	0.0028317
1129.12	0.00122015	-0.000480377	0.000767764	0.00280482
1129.6	0.00121716	-0.000501327	0.000749973	0.00278221
1130.08	0.0012141	-0.000517676	0.000736764	0.00276571
1130.56	0.00121018	-0.000528829	0.000730457	0.0027565
1131.05	0.00120523	-0.000534157	0.000733511	0.00275643
1131.53	0.00119895	-0.000533759	0.000746853	0.00276621
1132.01	0.00119168	-0.000526975	0.000770586	0.00278651
1132.49	0.00118437	-0.000513638	0.000803116	0.00281679
1132.97	0.00117802	-0.000493682	0.000841658	0.00285505
1133.46	0.001174	-0.00046866	0.000882792	0.00289764
1133.94	0.0011729	-0.000441121	0.000922769	0.0029402
1134.42	0.0011748	-0.00041517	0.00095893	0.00297787
1134.9	0.00117869	-0.000394844	0.000989814	0.00300686
1135.38	0.001183	-0.000382993	0.00101562	0.00302478
1135.87	0.00118613	-0.000380312	0.00103767	0.00303165
1136.35	0.00118609	-0.000385377	0.0010581	0.00302958
1136.83	0.00118184	-0.000394944	0.00107886	0.00302254
1137.31	0.00117277	-0.000405636	0.00110121	0.003015
1137.8	0.00115912	-0.000414541	0.0011256	0.00301147
1138.28	0.00114207	-0.000420334	0.00115194	0.00301527
1138.76	0.00112287	-0.000423379	0.00117955	0.00302785
1139.24	0.00110364	-0.000425663	0.00120736	0.003049
1139.72	0.00108583	-0.000428609	0.001235	0.00307703
1140.21	0.00107092	-0.00043331	0.00126228	0.00310927
1140.69	0.00106026	-0.000439532	0.0012896	0.00314318
1141.17	0.00105385	-0.000445888	0.00131768	0.00317739
1141.65	0.00105126	-0.000450191	0.00134776	0.00321193
1142.13	0.00105109	-0.000450323	0.00138103	0.00324865
1142.62	0.00105205	-0.000444795	0.0014183	0.00328965
1143.1	0.00105195	-0.00043331	0.00146025	0.00333716
1143.58	0.00104953	-0.000416726	0.00150673	0.00339242
1144.06	0.00104372	-0.000397261	0.00155747	0.00345451
1144.55	0.00103442	-0.000377498	0.00161204	0.00352148
1145.03	0.00102249	-0.000360349	0.00167028	0.00359063
1145.51	0.00100891	-0.000347702	0.00173298	0.00366069
1145.99	0.000995493	-0.000340517	0.00180215	0.00373207
1146.47	0.000984135	-0.000338365	0.00188035	0.00380744
1146.96	0.000976098	-0.000339292	0.0019708	0.00389145
1147.44	0.000972578	-0.000340782	0.00207656	0.00398965
1147.92	0.000973807	-0.000340849	0.00219956	0.00410607
1148.4	0.000978921	-0.000338134	0.00234029	0.0042429
1148.88	0.000986559	-0.00033234	0.00249805	0.00439955
1149.37	0.000995061	-0.000324394	0.00267021	0.0045729
1149.85	0.0010027	-0.000315553	0.00285315	0.00475807
1150.33	0.00100825	-0.00030711	0.0030421	0.00494899
1150.81	0.00101137	-0.000300124	0.00323129	0.00513899
1151.3	0.00101263	-0.000294395	0.00341453	0.00532129
1151.78	0.00101263	-0.000289727	0.00358472	0.00548856
1152.26	0.0010126	-0.000285753	0.00373531	0.00563385
1152.74	0.00101333	-0.00028221	0.00386019	0.00574997
1153.22	0.00101522	-0.000279363	0.00395447	0.00583086
1153.7	0.00101794	-0.000277773	0.0040143	0.00587194
1154.19	0.00102073	-0.000277508	0.00403774	0.00587069
1154.67	0.00102293	-0.000278402	0.0040245	0.005827
1155.15	0.00102385	-0.000279528	0.00397594	0.00574339
1155.63	0.00102332	-0.000279992	0.00389536	0.00562415
1156.12	0.00102173	-0.000278502	0.00378832	0.00547544
1156.6	0.0010194	-0.000274164	0.00366136	0.00530432
1157.08	0.00101708	-0.000266548	0.00352288	0.00511881
1157.56	0.00101502	-0.000255885	0.0033812	0.00492681
1158.04	0.00101373	-0.000242573	0.00324401	0.00473593
1158.53	0.00101313	-0.000228002	0.00311741	0.00455301
1159.01	0.00101369	-0.000213728	0.00300509	0.00438298
1159.49	0.00101505	-0.000201971	0.00290825	0.00422891
1159.97	0.00101788	-0.000195248	0.00282593	0.00409148
1160.45	0.00102213	-0.000195381	0.0027568	0.00397012
1160.94	0.00102821	-0.000203428	0.00269885	0.00386347
1161.42	0.00103591	-0.000218729	0.00265171	0.00377071
1161.9	0.00104488	-0.000239063	0.00261591	0.00369204
1162.38	0.00105478	-0.000261283	0.00259278	0.00362872
1162.87	0.00106428	-0.000282078	0.00258331	0.00358197
1163.35	0.00107222	-0.000299395	0.00258764	0.00355224
1163.83	0.00107713	-0.000313103	0.00260441	0.00353848
1164.31	0.00107793	-0.00032499	0.00263098	0.00353738
1164.79	0.00107394	-0.000337935	0.00266391	0.00354469
1165.28	0.00106551	-0.000354588	0.00269985	0.00355598
1165.76	0.00105358	-0.000375842	0.00273653	0.00356771
1166.24	0.00103976	-0.000401134	0.00277224	0.00357773
1166.72	0.00102595	-0.000427848	0.00280606	0.00358572
1167.2	0.00101373	-0.000452607	0.00283737	0.00359203
1167.69	0.00100399	-0.00047336	0.00286525	0.00359714
1168.17	0.000996755	-0.000488618	0.00288877	0.00360139
1168.65	0.000991441	-0.000499109	0.00290665	0.00360469
1169.13	0.000987057	-0.000506126	0.00291819	0.0036071
1169.62	0.000982906	-0.000510858	0.00292333	0.00360927
1170.1	0.000978622	-0.000514035	0.00292276	0.00361228
1170.58	0.00097467	-0.000515458	0.00291786	0.00361782
1171.06	0.000971582	-0.000514664	0.00291022	0.00362725
1171.54	0.000969955	-0.000512182	0.00290124	0.00364074
1172.03	0.000969623	-0.000509766	0.00289207	0.00365748
1172.51	0.000970054	-0.000510229	0.0028838	0.00367533
1172.99	0.000970021	-0.000516948	0.00287736	0.00369271
1173.47	0.000968195	-0.000531873	0.00287463	0.00370935
1173.95	0.000963911	-0.000555667	0.00287803	0.00372736
1174.44	0.000957236	-0.000586474	0.0028909	0.00375126
1174.92	0.000949167	-0.000620819	0.00291682	0.00378762
1175.4	0.000941596	-0.000654732	0.00295902	0.00384264
1175.88	0.00093625	-0.000685433	0.00301984	0.00392077
1176.37	0.000934457	-0.000711897	0.00309952	0.00402322
1176.85	0.000936682	-0.000734953	0.00319645	0.00414641
1177.33	0.000942094	-0.000756917	0.00330651	0.00428368
1177.81	0.000948901	-0.000780235	0.00342355	0.00442509
1178.29	0.000954679	-0.000806594	0.00353982	0.00455957
1178.78	0.00095717	-0.000836723	0.00364756	0.00467728
1179.26	0.000954845	-0.000869891	0.00373906	0.00477023
1179.74	0.000946842	-0.000904445	0.00380834	0.00483339
1180.22	0.000934092	-0.000938269	0.003852	0.00486502
1180.7	0.000918353	-0.000968818	0.00386861	0.00486562
1181.19	0.000902083	-0.000993447	0.00385939	0.00483754
1181.67	0.000887938	-0.00101024	0.00382639	0.004784
1182.15	0.000878144	-0.00101738	0.00377351	0.00470887
1182.63	0.000873961	-0.00101401	0.00370457	0.0046166
1183.12	0.00087592	-0.00100079	0.00362357	0.00451142
1183.6	0.000883025	-0.000979397	0.00353444	0.00439861
1184.08	0.000894413	-0.000952751	0.00344081	0.00428291
1184.56	0.000908391	-0.000923986	0.00334614	0.00416872
1185.04	0.000923831	-0.000896113	0.00325349	0.00405978
1185.53	0.000939438	-0.000871743	0.003165	0.00395802
1186.01	0.000954248	-0.000852563	0.00308237	0.00386377
1186.49	0.000967265	-0.00084003	0.00300596	0.00377582
1186.97	0.000977128	-0.000834242	0.002936	0.00369264
1187.45	0.000983072	-0.000835929	0.00287216	0.00361245
1187.94	0.000984235	-0.00084456	0.00281416	0.00353454
1188.42	0.000980748	-0.000859276	0.00276184	0.00345972
1188.9	0.000973641	-0.000877926	0.00271592	0.00339019
1189.38	0.000964376	-0.000897568	0.00267688	0.00332868
1189.86	0.000954812	-0.000915125	0.00264491	0.00327763
1190.35	0.00094671	-0.00092759	0.00261991	0.00323834
1190.83	0.000940766	-0.00093331	0.00260104	0.00321043
1191.31	0.000936748	-0.000932351	0.00258701	0.00319224
1191.79	0.000934058	-0.000926301	0.00257628	0.00318069
1192.28	0.000931634	-0.000917836	0.00256711	0.00317285
1192.76	0.000928679	-0.000909405	0.00255805	0.00316617
1193.24	0.000925259	-0.000903222	0.00254818	0.0031589
1193.72	0.000922038	-0.000900213	0.00253665	0.00315015
1194.2	0.00091978	-0.000900114	0.00252342	0.00314007
1194.68	0.000918751	-0.000901965	0.00250879	0.00312903
1195.17	0.000918884	-0.000904875	0.00249332	0.00311778
1195.65	0.000918884	-0.000907388	0.00247833	0.00310707
1196.13	0.000917257	-0.000908678	0.00246453	0.00309709
1196.61	0.000912807	-0.000908512	0.0024522	0.00308744
1197.1	0.000904772	-0.00090676	0.00244091	0.00307703
1197.58	0.000893317	-0.000903784	0.00242908	0.00306348
1198.06	0.000879306	-0.000900411	0.00241495	0.0030445
1198.54	0.000864266	-0.000897468	0.00239692	0.00301794
1199.02	0.000849393	-0.000895815	0.00237417	0.00298287
1199.51	0.000835449	-0.00089598	0.00234695	0.00294007
1199.99	0.000823034	-0.000897369	0.00231734	0.00289254
1200.47	0.000812013	-0.000899023	0.00228726	0.00284408
1200.95	0.000802386	-0.00089932	0.00225858	0.00279872
1201.43	0.000794452	-0.000897303	0.00223187	0.00275917
1201.92	0.000788046	-0.000892608	0.00220649	0.00272619
1202.4	0.000783564	-0.000886325	0.00218055	0.00269809
1202.88	0.000780942	-0.000880373	0.00215221	0.00267205
1203.36	0.000779714	-0.000876603	0.00212031	0.00264488
1203.85	0.000779515	-0.000876769	0.00208479	0.00261418
1204.33	0.000780013	-0.000880737	0.0020471	0.00257914
1204.81	0.000781075	-0.000887449	0.00200965	0.00254075
1205.29	0.000782768	-0.000895187	0.00197443	0.00250045
1205.77	0.000785058	-0.000901866	0.00194308	0.00246053
1206.26	0.000787448	-0.000906627	0.00191599	0.00242188
1206.74	0.000789606	-0.000909107	0.00189259	0.0023854
1207.22	0.000790502	-0.000909504	0.00187203	0.00235148
1207.7	0.000789606	-0.000908281	0.00185352	0.00232053
1208.18	0.000786917	-0.000904908	0.00183672	0.00229315
1208.67	0.000782701	-0.000898394	0.00182128	0.0022704
1209.15	0.00077822	-0.000888111	0.00180714	0.00225298
1209.63	0.000774669	-0.00087376	0.0017937	0.00224079
1210.11	0.000772876	-0.000857159	0.00177996	0.0022324
1210.6	0.000772677	-0.000841088	0.00176505	0.00222571
1211.08	0.000773274	-0.000829745	0.00174792	0.00221788
1211.56	0.000772777	-0.000826371	0.00172879	0.00220692
1212.04	0.000769557	-0.000832589	0.00170827	0.0021918
1212.52	0.000762686	-0.00084757	0.00168791	0.00217326
1213.01	0.000752131	-0.000868237	0.00166938	0.00215314
1213.49	0.000738987	-0.000890591	0.00165408	0.00213386
1213.97	0.000724882	-0.000910794	0.00164271	0.00211801
1214.45	0.000711672	-0.000925507	0.00163602	0.00210789
1214.93	0.000700355	-0.000933542	0.00163386	0.00210443
1215.42	0.000691461	-0.000934467	0.00163649	0.00210849
1215.9	0.000684923	-0.000928615	0.00164371	0.00211981
1216.38	0.00068051	-0.000916844	0.00165528	0.00213749
1216.86	0.000677722	-0.000900048	0.00167025	0.00216004
1217.35	0.000676328	-0.000879712	0.00168701	0.00218505
1217.83	0.00067593	-0.000857887	0.00170388	0.00220979
1218.31	0.000676361	-0.000837483	0.00171875	0.0022319
1218.79	0.000677158	-0.000820782	0.00173085	0.00224989
1219.27	0.00067749	-0.000809472	0.00173977	0.00226394
1219.76	0.000676959	-0.000802957	0.00174692	0.002276
1220.24	0.000674802	-0.000799054	0.00175381	0.00228892
1220.72	0.000670952	-0.000794027	0.00176266	0.00230628
1221.2	0.000665344	-0.000784105	0.0017744	0.00233076
1221.68	0.000658508	-0.000766906	0.00178974	0.00236324
1222.17	0.000650809	-0.000742495	0.00180754	0.00240242
1222.65	0.000642281	-0.000713618	0.00182661	0.00244517
1223.13	0.000633753	-0.000684242	0.00184504	0.00248713
1223.61	0.000625458	-0.000658768	0.00186141	0.00252402
1224.09	0.000618224	-0.000640208	0.00187469	0.00255248
1224.58	0.000612583	-0.000629653	0.00188451	0.00257111
1225.06	0.000608834	-0.000626444	0.00189113	0.00258011
1225.54	0.000607075	-0.000628628	0.00189509	0.00258154
1226.02	0.000606345	-0.000633888	0.00189732	0.00257831
1226.51	0.000605217	-0.000640208	0.00189885	0.00257384
1226.99	0.000601966	-0.000645832	0.00190101	0.00257124
1227.47	0.000595595	-0.000650298	0.00190447	0.00257188
1227.95	0.000585973	-0.000652614	0.0019095	0.00257671
1228.43	0.000573996	-0.000652052	0.00191619	0.00258521
1228.92	0.000561687	-0.000648479	0.00192361	0.00259594
1229.4	0.000551236	-0.000641498	0.0019314	0.00260771
1229.88	0.000544734	-0.000631837	0.00193905	0.00261931
1230.36	0.000543075	-0.000620091	0.00194667	0.00263044
1230.84	0.000545663	-0.00060732	0.00195519	0.00264178
1231.33	0.00055117	-0.000593952	0.00196555	0.00265428
1231.81	0.000557308	-0.000580187	0.00197876	0.00266908
1232.29	0.000561886	-0.000566124	0.00199487	0.00268675
1232.77	0.000563113	-0.000551497	0.00201371	0.00270735
1233.26	0.000560459	-0.000536837	0.00203402	0.00273013
1233.74	0.000553923	-0.000523401	0.00205406	0.00275417
1234.22	0.000544933	-0.000511983	0.002073	0.00277908
1234.7	0.000535146	-0.000503445	0.00209015	0.00280479
1235.18	0.000526421	-0.000497124	0.00210586	0.00283243
1235.66	0.000520616	-0.000491663	0.00212081	0.00286309
1236.15	0.000518559	-0.000484415	0.00213626	0.00289848
1236.63	0.000520782	-0.000473658	0.00215328	0.0029392
1237.11	0.000526554	-0.000458499	0.00217276	0.00298538
1237.59	0.000534549	-0.000439996	0.00219547	0.00303602
1238.08	0.000543141	-0.000420698	0.00222228	0.00308988
1238.56	0.000550805	-0.00040312	0.00225428	0.00314575
1239.04	0.000556478	-0.000388853	0.00229209	0.00320279
1239.52	0.000560127	-0.000377465	0.00233669	0.00326144
1240	0.000562151	-0.000366639	0.0023881	0.00332254
1240.49	0.000563379	-0.000352569	0.002446	0.00338751
1240.97	0.00056454	-0.000332406	0.00250909	0.00345741
1241.45	0.000565668	-0.00030519	0.00257554	0.0035325
1241.93	0.00056663	-0.00027274	0.00264334	0.00361134
1242.41	0.000566929	-0.000239857	0.00271002	0.00369123
1242.9	0.000565834	-0.000211907	0.00277334	0.00376813
1243.38	0.000563346	-0.000194089	0.00283154	0.00383779
1243.86	0.000559796	-0.000189022	0.00288283	0.0038968
1244.34	0.000556113	-0.000196175	0.00292696	0.0039437
1244.83	0.000553359	-0.00021194	0.00296392	0.00397912
1245.31	0.000552431	-0.000231313	0.00299465	0.0040061
1245.79	0.00055399	-0.000249096	0.00302051	0.00402831
1246.27	0.00055817	-0.000261051	0.00304266	0.00404968
1246.75	0.000565137	-0.000265455	0.00306182	0.00407265
1247.24	0.000574593	-0.000262342	0.00307813	0.00409787
1247.72	0.000586504	-0.0002536	0.00309131	0.00412427
1248.2	0.000599809	-0.000241977	0.00310093	0.00414966
1248.68	0.000613579	-0.000230419	0.00310717	0.00417133
1249.16	0.000625756	-0.000221279	0.0031113	0.00418759
1249.65	0.000634483	-0.000216344	0.00311494	0.00419766
1250.13	0.00063747	-0.000216245	0.00312065	0.00420184
1250.61	0.000633421	-0.000220683	0.00313003	0.00420114
1251.09	0.000622272	-0.000228631	0.00314448	0.00419706
1251.58	0.000605449	-0.0002385	0.00316353	0.00419124
1252.06	0.000585509	-0.000248832	0.0031862	0.00418518
1252.54	0.000565602	-0.000259197	0.00321097	0.0041804
1253.02	0.000548682	-0.000269859	0.00323644	0.00417792
1253.5	0.000536307	-0.000281912	0.00326201	0.00417852
1253.99	0.000529208	-0.000296813	0.00328758	0.0041822
1254.47	0.000526421	-0.000315553	0.00331389	0.00418849
1254.95	0.000526753	-0.00033671	0.0033418	0.00419753
1255.43	0.00052871	-0.000357171	0.00337209	0.00421037
1255.91	0.000531464	-0.000371307	0.00340591	0.00422995
1256.4	0.000535113	-0.000372797	0.00344399	0.0042608
1256.88	0.000540122	-0.000356244	0.00348701	0.00430744
1257.36	0.000547355	-0.000319096	0.00353491	0.0043728
1257.84	0.000557075	-0.000263435	0.00358635	0.00445545
1258.33	0.000569019	-0.00019644	0.0036381	0.00454782
1258.81	0.000581759	-0.000129468	0.00368469	0.00463642
1259.29	0.000593538	-7.46446e-05	0.00372041	0.00470595
1259.77	0.000602198	-4.31715e-05	0.00373932	0.00474163
1260.25	0.000606279	-4.08855e-05	0.00373829	0.00473506
1260.73	0.000605416	-6.69256e-05	0.0037178	0.0046874
1261.22	0.000600539	-0.000113834	0.00368211	0.0046089
1261.7	0.000593836	-0.000169713	0.0036381	0.00451621
1262.18	0.000587831	-0.000222405	0.00359293	0.00442602
1262.66	0.000584812	-0.000261283	0.00355271	0.00435229
1263.15	0.000586205	-0.000280422	0.00352037	0.00430162
1263.63	0.000591846	-0.000279594	0.00349612	0.00427371
1264.11	0.000599941	-0.000261945	0.00347799	0.00426314
1264.59	0.00060817	-0.000233002	0.00346329	0.00426301
1265.07	0.000614176	-0.000197831	0.00345027	0.00426802
1265.56	0.000616698	-0.000159644	0.00343831	0.00427616
1266.04	0.000615835	-0.0001192	0.00342776	0.00428824
1266.52	0.000613114	-7.60028e-05	0.00341907	0.00430634
1267	0.000610991	-2.89913e-05	0.00341269	0.00433248
1267.48	0.00061192	2.17365e-05	0.00340758	0.00436655
1267.97	0.000617627	7.46243e-05	0.00340238	0.00440678
1268.45	0.000628212	0.00012606	0.00339496	0.00444929
1268.93	0.000642746	0.000171569	0.00338388	0.00448956
1269.41	0.000659138	0.00020601	0.00336805	0.00452227
1269.9	0.000674868	0.000223779	0.00334624	0.00454109
1270.38	0.000688209	0.000220696	0.00331783	0.00454012
1270.86	0.000698198	0.000193811	0.00328214	0.00451377
1271.34	0.000704836	0.000142665	0.00323927	0.00445903
1271.82	0.000708519	6.95208e-05	0.00319037	0.00437669
1272.31	0.000710644	-1.97143e-05	0.0031385	0.00427344
1272.79	0.000711672	-0.000116716	0.00308815	0.00416063
1273.27	0.000712303	-0.000212106	0.0030443	0.00405128
1273.75	0.000712535	-0.000295985	0.00301163	0.00395899
1274.23	0.000711772	-0.00036121	0.00299258	0.00389282
1274.72	0.000709482	-0.000404246	0.00298701	0.00385604
1275.2	0.000704836	-0.000425266	0.00299218	0.00384605
1275.68	0.000697667	-0.000427285	0.00300443	0.00385648
1276.16	0.000688076	-0.000415104	0.00302004	0.00388005
1276.64	0.000677125	-0.000393553	0.00303672	0.00391074
1277.13	0.000666273	-0.000365679	0.00305418	0.00394581
1277.61	0.000657346	-0.000333962	0.0030728	0.00398407
1278.09	0.00065207	-0.000300157	0.00309292	0.00402493
1278.57	0.000651473	-0.000266945	0.00311347	0.00406613
1279.06	0.000655455	-0.00023787	0.00313173	0.00410363
1279.54	0.000662822	-0.000217636	0.00314364	0.00413183
1280.02	0.000671118	-0.000209986	0.00314588	0.00414648
1280.5	0.00067822	-0.000216974	0.00313673	0.00414584
1280.98	0.000682202	-0.000237374	0.00311714	0.00413223
1281.47	0.000682534	-0.000266912	0.00309058	0.00411105
1281.95	0.000679647	-0.000298932	0.00306205	0.00408948
1282.43	0.000675465	-0.000325354	0.00303696	0.00407503
1282.91	0.000672147	-0.000338829	0.00301981	0.00407389
1283.39	0.000671483	-0.000333134	0.00301417	0.00409129
1283.88	0.000674968	-0.0003037	0.00302204	0.00413189
1284.36	0.000682799	-0.000248037	0.00304453	0.00419937
1284.84	0.000694216	-0.000166831	0.00308144	0.00429593
1285.32	0.000708121	-6.43415e-05	0.00313059	0.0044194
1285.81	0.000722658	5.09631e-05	0.003188	0.00456238
1286.29	0.000736033	0.00016547	0.00324708	0.00471021
1286.77	0.000746522	0.000263363	0.00329953	0.0048436
1287.25	0.000752396	0.000330439	0.00333856	0.00494477
1287.73	0.000752529	0.000356204	0.00335876	0.00499954
1288.22	0.000746887	0.000338762	0.00335943	0.00500513
1288.7	0.000735867	0.000284516	0.0033437	0.00496843
1289.18	0.000721198	0.000206971	0.00331836	0.00490573
1289.66	0.000704902	0.00012089	0.00329038	0.00483476
1290.14	0.000689038	3.90999e-05	0.00326548	0.00477023
1290.63	0.000675698	-3.0913e-05	0.00324655	0.00472029
1291.11	0.000666041	-8.74982e-05	0.003234	0.00468582
1291.59	0.0006602	-0.000132317	0.00322685	0.00466412
1292.07	0.000657844	-0.000167394	0.00322488	0.00465253
1292.56	0.000658541	-0.000192036	0.00322876	0.0046523
1293.04	0.000661926	-0.000202336	0.00324141	0.00466881
1293.52	0.000667202	-0.000193427	0.00326524	0.00470803
1294	0.000673839	-0.000162956	0.0033013	0.00477318
1294.48	0.000680676	-0.000113767	0.00334771	0.00486063
1294.97	0.000686019	-5.48665e-05	0.00339987	0.00495955
1295.45	0.000688275	1.3585e-06	0.00345187	0.00505545
1295.93	0.000685919	4.23142e-05	0.00349826	0.00513383
1296.41	0.000678883	6.08052e-05	0.00353644	0.0051867
1296.89	0.000667932	5.67623e-05	0.00356657	0.00521471
1297.38	0.000655123	3.72111e-05	0.00359163	0.0052257
1297.86	0.000642978	1.27899e-05	0.00361542	0.00523167
1298.34	0.000633554	-7.62076e-06	0.00363981	0.00524244
1298.82	0.000627847	-1.84221e-05	0.00366507	0.0052633
1299.31	0.000625557	-1.97806e-05	0.00368883	0.00529335
1299.79	0.000625623	-1.52083e-05	0.00370791	0.00532783
1300.27	0.00062632	-9.21117e-06	0.00371937	0.00536094
1300.75	0.000626387	-4.24114e-06	0.00372248	0.00538935
1301.23	0.000625358	-1.6567e-07	0.003718	0.0054126
1301.71	0.000622969	5.26834e-06	0.00370841	0.0054327
1302.2	0.00061975	1.41485e-05	0.00369645	0.00545233
1302.68	0.000615636	2.73696e-05	0.00368428	0.00547353
1303.16	0.000610991	4.44019e-05	0.00367386	0.00549776
1303.64	0.000605449	6.46825e-05	0.00366651	0.00552702
1304.13	0.000599543	8.91729e-05	0.00366427	0.00556518
1304.61	0.000593903	0.000120923	0.00366908	0.00561761
1305.09	0.000589424	0.000163514	0.00368288	0.0056889
1305.57	0.000586603	0.000218673	0.0037059	0.00578026
1306.05	0.000585475	0.000283455	0.00373635	0.00588631
1306.54	0.00058438	0.000350036	0.00377064	0.00599595
1307.02	0.000581759	0.000407806	0.0038039	0.0060948
1307.5	0.000575621	0.000448336	0.00383264	0.00617179
1307.98	0.000565602	0.000470858	0.00385631	0.00622503
1308.46	0.000553194	0.000485154	0.00387838	0.0062656
1308.95	0.00054198	0.000510133	0.00390532	0.00631505
1309.43	0.000536108	0.000566962	0.00394444	0.00639793
1309.91	0.000539492	0.000672678	0.00400055	0.0065342
1310.39	0.000553791	0.000831565	0.00407409	0.00672903
1310.88	0.000577678	0.00103226	0.00415936	0.00696988
1311.36	0.000606943	0.00124849	0.00424534	0.00722638
1311.84	0.000635976	0.00144748	0.00431875	0.00746012
1312.32	0.000659537	0.00160017	0.00436822	0.00763591
1312.8	0.000674204	0.00168917	0.00438683	0.00773156
1313.29	0.000679713	0.00171602	0.00437532	0.00774704
1313.77	0.000678817	0.00169945	0.00434165	0.00770349
1314.25	0.000676561	0.00167021	0.00429874	0.00763783
1314.73	0.000677888	0.00165854	0.0042606	0.00758823
1315.21	0.000687313	0.00168867	0.00423898	0.00758695
1315.7	0.000706794	0.00177167	0.00424065	0.00765115
1316.18	0.000736299	0.00190271	0.00426565	0.00777847
1316.66	0.000772743	0.00206268	0.00430708	0.00794785
1317.14	0.000810685	0.00222038	0.00435212	0.00812238
1317.62	0.000843517	0.00234196	0.00438599	0.00826035
1318.11	0.000864499	0.00239456	0.00439366	0.00832063
1318.59	0.000867985	0.00235638	0.00436531	0.00827598
1319.07	0.000851584	0.00222284	0.00429891	0.00811962
1319.55	0.000816627	0.00200712	0.00420034	0.00786717
1320.04	0.000768163	0.00173834	0.00408286	0.00755327
1320.52	0.000713	0.00145137	0.00396149	0.00721965
1321	0.000659271	0.00118181	0.00385153	0.00690904
1321.48	0.000613147	0.000954779	0.00376342	0.00665235
1321.96	0.000577911	0.000780975	0.00370136	0.00646327
1322.45	0.000553724	0.000657911	0.0036643	0.00634084
1322.93	0.000538165	0.000573863	0.00364766	0.00627219
1323.41	0.000527947	0.000514081	0.00364586	0.00624012
1323.89	0.000519985	0.000465982	0.00365381	0.00622839
1324.38	0.000512488	0.000424157	0.00366895	0.00622755
1324.86	0.000505588	0.000389267	0.00369037	0.00623471
1325.34	0.000499849	0.000365755	0.00371763	0.00625098
1325.82	0.000495935	0.000357266	0.00374998	0.00627807
1326.3	0.000494044	0.000364362	0.00378491	0.00631512
1326.79	0.000493082	0.00038353	0.00381857	0.00635792
1327.27	0.000491722	0.000408967	0.00384665	0.00640015
1327.75	0.000489235	0.000435069	0.00386557	0.00643566
1328.23	0.000485154	0.000458154	0.00387279	0.00645974
1328.71	0.000480146	0.000476497	0.00386714	0.00646949
1329.2	0.000475104	0.000489168	0.00384846	0.006463
1329.68	0.000470858	0.000494243	0.003817	0.00643788
1330.16	0.00046774	0.0004895	0.00377335	0.00639191
1330.64	0.000465717	0.000473478	0.00371917	0.00632527
1331.12	0.000465186	0.000449198	0.00365835	0.00624378
1331.61	0.000467043	0.000425451	0.00359647	0.00615986
1332.09	0.000473478	0.00041822	0.00354205	0.0060946
1332.57	0.000487111	0.000447606	0.00350447	0.00607343
1333.05	0.000510166	0.00053216	0.00349218	0.0061198
1333.54	0.000544269	0.000687678	0.00351249	0.00625397
1334.02	0.000589424	0.000923499	0.00357032	0.00648896
1334.5	0.000645102	0.00124417	0.00366878	0.00683185
1334.98	0.000710445	0.00165189	0.00381045	0.00728676
1335.46	0.000784826	0.00214815	0.00399684	0.00785651
1335.95	0.000867985	0.00273286	0.00422791	0.0085409
1336.43	0.000959229	0.00339676	0.0044989	0.00932904
1336.91	0.00105494	0.00411453	0.0047974	0.010191
1337.39	0.00114792	0.00483469	0.00509953	0.0110658
1337.87	0.00122573	0.00547337	0.00536855	0.0118537
1338.36	0.00127402	0.00593102	0.00556142	0.0124352
1338.84	0.001279	0.00611019	0.00563734	0.012691
1339.32	0.00123321	0.00595094	0.00557155	0.0125443
1339.8	0.00113918	0.00545998	0.00536772	0.0119979
1340.29	0.00100994	0.00471312	0.00505856	0.0111384
1340.77	0.000864997	0.00383345	0.00469664	0.0101125
1341.25	0.000723089	0.00294414	0.00433478	0.00907037
1341.73	0.000598979	0.00214961	0.00401811	0.00814227
1342.21	0.000500712	0.00151225	0.00377412	0.00740831
1342.69	0.000429497	0.00105019	0.00361041	0.00689386
1343.18	0.000381739	0.000750936	0.00352118	0.00658479
1343.66	0.000351695	0.00058083	0.00349048	0.00643805
1344.14	0.000333788	0.000501011	0.0034993	0.00640297
1344.62	0.000323343	0.000474805	0.00353026	0.00643082
1345.11	0.00031827	0.000477558	0.00357165	0.00648923
1345.59	0.000317739	0.000497561	0.00361826	0.00656417
1346.07	0.000321619	0.000531364	0.00366955	0.0066539
1346.55	0.000329378	0.000579072	0.00372622	0.00676087
1347.03	0.000339757	0.0006382	0.00378738	0.00688379
1347.52	0.000350302	0.00070082	0.00384892	0.00701227
1348	0.000358492	0.000755151	0.00390395	0.0071288
1348.48	0.000361974	0.000787979	0.00394541	0.00721361
1348.96	0.000359719	0.000789971	0.00396872	0.00725239
1349.44	0.000352358	0.00076013	0.00397427	0.00724309
1349.93	0.000342078	0.000707225	0.00396758	0.00719765
1350.41	0.000332528	0.000649382	0.00395882	0.00714045
1350.89	0.000327421	0.00060744	0.00395825	0.00709976
1351.37	0.000329709	0.000601866	0.00397534	0.00710178
1351.86	0.00034042	0.000644537	0.00401466	0.00716214
1352.34	0.000358062	0.000735303	0.00407553	0.00728107
1352.82	0.000378523	0.000860581	0.00415153	0.00744266
1353.3	0.000396331	0.000996157	0.00423302	0.00761895
1353.78	0.000406612	0.00111536	0.00430962	0.00777891
1354.27	0.000405684	0.00119413	0.00437284	0.00789453
1354.75	0.000393678	0.00122005	0.00441819	0.00795058
1355.23	0.000373316	0.00119543	0.00444654	0.00794879
1355.71	0.000350235	0.00113686	0.00446395	0.00790759
1356.19	0.000330572	0.00106972	0.00447975	0.00785661
1356.68	0.000319497	0.00102196	0.00450493	0.00782975
1357.16	0.000321221	0.00102223	0.00455167	0.00786349
1357.64	0.000338729	0.00109696	0.0046321	0.00799135
1358.12	0.000374643	0.00127072	0.00475791	0.0082441
1358.61	0.000431951	0.00156712	0.00493981	0.0086502
1359.09	0.000512853	0.00200432	0.0051855	0.00922952
1359.57	0.000617494	0.00258708	0.00549568	0.00998548
1360.05	0.000740713	0.00329402	0.00585901	0.0108901
1360.53	0.000870939	0.00406911	0.00624903	0.0118747
1361.02	0.000988784	0.00481312	0.00662072	0.0128198
1361.5	0.00106933	0.00539019	0.00691355	0.0135614
1361.98	0.00109151	0.00567138	0.00707023	0.0139427
[truncated: 5,472 more rows]
