# Supplementary material for: Ionogel thin films as a compatibilizing pretreatment for electrospray deposition
Source: Royal Society of Chemistry journal article supplement (doi:10.1039/d5lp00359h), 2026-01-01
Supplement: d5lp00359h1.zip [file FTIR - Pre-Heat Absorbance.xlsx]

## Sheet: v2 - Pre-Heat FTIR
Wavelength	Al2O3 only	IG Only	PS only	PS on IG
cm^-1
	Absorbance	Absorbance	Absorbance	Absorbance
399.675	0	0	0	0
400.157	6	0.477363	0.190332	0.192105
400.639	6	0.479901	0.181165	0.187547
401.121	6	0.485227	0.174476	0.184262
401.603	6	0.489959	0.16936	0.181134
402.085	6	0.491995	0.16502	0.177479
402.567	6	0.49153	0.160984	0.173234
403.05	6	0.490933	0.157187	0.168862
403.532	2.20308	0.492918	0.153714	0.164903
404.014	1.81629	0.499179	0.150591	0.161664
404.496	1.806	0.509226	0.147565	0.159019
404.978	1.94627	0.520538	0.14421	0.156491
405.46	2.10803	0.529226	0.140098	0.153498
405.942	2.04058	0.532419	0.13514	0.149733
406.424	1.80725	0.530242	0.129668	0.145359
406.906	1.6161	0.52586	0.124349	0.14094
407.389	1.50915	0.523295	0.119807	0.137112
407.871	1.47438	0.525236	0.116372	0.134263
408.353	1.49149	0.532276	0.114064	0.132464
408.835	1.52664	0.542699	0.112615	0.131448
409.317	1.53306	0.553383	0.111614	0.13076
409.799	1.48233	0.561117	0.110695	0.129921
410.281	1.40024	0.564665	0.109701	0.128683
410.764	1.32919	0.565155	0.108715	0.127088
411.246	1.29311	0.565021	0.107948	0.125382
411.728	1.29482	0.566016	0.107549	0.123826
412.21	1.32214	0.568199	0.107475	0.122566
412.692	1.3447	0.569809	0.10748	0.121584
413.174	1.32681	0.568609	0.107241	0.120776
413.656	1.25904	0.563304	0.106546	0.120038
414.138	1.17047	0.554742	0.105502	0.119393
414.62	1.09259	0.545285	0.104526	0.119012
415.103	1.04214	0.53748	0.104244	0.119188
415.585	1.02339	0.532692	0.105302	0.120226
416.067	1.03463	0.53061	0.108159	0.122347
416.549	1.06998	0.529435	0.112976	0.125588
417.031	1.11537	0.526606	0.119355	0.129666
417.513	1.14605	0.520306	0.126235	0.133909
417.995	1.13493	0.510968	0.131828	0.137254
418.477	1.08277	0.501651	0.134371	0.138664
418.959	1.01683	0.496027	0.133054	0.137652
419.442	0.960041	0.4961	0.128371	0.13445
419.924	0.916743	0.500934	0.121668	0.129796
420.406	0.881305	0.507577	0.114308	0.124501
420.888	0.847389	0.512642	0.107275	0.119225
421.37	0.812947	0.514145	0.101032	0.114378
421.852	0.779853	0.512103	0.0956871	0.110168
422.334	0.75167	0.508085	0.0911778	0.106673
422.816	0.73089	0.504011	0.0873621	0.103846
423.298	0.717862	0.501175	0.0840996	0.101565
423.781	0.710326	0.49966	0.0812642	0.0996473
424.263	0.704258	0.498437	0.07874	0.0978943
424.745	0.695364	0.49604	0.0764135	0.0961286
425.227	0.681344	0.49153	0.0741694	0.0942379
425.709	0.663039	0.485103	0.0719229	0.0922023
426.191	0.643247	0.477855	0.0696221	0.0900637
426.673	0.624729	0.471028	0.0672666	0.0878962
427.155	0.608661	0.465243	0.0648965	0.0857616
427.637	0.594554	0.460293	0.0625846	0.0837147
428.12	0.580776	0.455282	0.0604087	0.0817945
428.602	0.565767	0.449213	0.0584262	0.0800357
429.084	0.548868	0.441487	0.056654	0.0784701
429.566	0.530758	0.432326	0.055072	0.0771231
430.048	0.512858	0.42255	0.0536356	0.0760004
430.53	0.496495	0.413137	0.0523093	0.0750814
431.012	0.482127	0.404645	0.0510925	0.0743238
431.495	0.469225	0.397006	0.0500205	0.0736712
431.977	0.456584	0.389637	0.0491448	0.0730629
432.459	0.443027	0.381846	0.048498	0.0724525
432.941	0.42796	0.373206	0.0480604	0.0718121
433.423	0.411486	0.363716	0.0477483	0.0711303
433.905	0.394134	0.353688	0.0474372	0.0703957
434.387	0.376329	0.34342	0.046992	0.0695863
434.869	0.358018	0.332908	0.0462925	0.068651
435.351	0.33867	0.321792	0.0452813	0.0675247
435.834	0.31762	0.309502	0.0439638	0.0661463
436.316	0.294562	0.295642	0.0424176	0.0645011
436.798	0.269952	0.280292	0.0407628	0.0626451
437.28	0.244817	0.264017	0.0391369	0.0607092
437.762	0.220342	0.247631	0.0376529	0.0588688
438.244	0.197364	0.231832	0.0363893	0.057293
438.726	0.176355	0.217089	0.0353948	0.0561273
439.208	0.157446	0.20361	0.0346943	0.0554652
439.69	0.140569	0.191418	0.0342832	0.0553249
440.173	0.125661	0.180515	0.034119	0.0556384
440.655	0.11268	0.170915	0.0341064	0.0562415
441.137	0.101586	0.162652	0.034123	0.0569145
441.619	0.0923142	0.155742	0.0340262	0.0574108
442.101	0.0847197	0.150122	0.0337165	0.0575457
442.583	0.0785995	0.14564	0.0331642	0.0572465
443.065	0.0737029	0.142056	0.0324172	0.056562
443.547	0.069789	0.139105	0.0315743	0.05564
444.029	0.0666468	0.13657	0.0307467	0.0546712
444.512	0.0640916	0.13431	0.0300186	0.0538396
444.994	0.0619759	0.132283	0.0294114	0.0532587
445.476	0.0601817	0.130519	0.0288955	0.0529617
445.958	0.0586143	0.129072	0.0284045	0.0529101
446.44	0.0572146	0.127968	0.0278693	0.0530203
446.922	0.0559449	0.127182	0.0272482	0.0531986
447.404	0.0547896	0.126624	0.0265373	0.0533662
447.886	0.0537405	0.126186	0.0257773	0.0534898
448.369	0.0527846	0.125762	0.0250403	0.053587
448.851	0.0519023	0.125291	0.0244114	0.0537184
449.333	0.0510699	0.124768	0.0239558	0.0539562
449.815	0.0502687	0.124221	0.0237156	0.0543612
450.297	0.0494964	0.123679	0.0236907	0.0549498
450.779	0.048762	0.123146	0.0238406	0.0556811
451.261	0.0480839	0.122593	0.0240845	0.0564566
451.743	0.0474707	0.121975	0.0243165	0.057147
452.226	0.0469127	0.121262	0.0244462	0.0576481
452.708	0.0463797	0.120469	0.0244348	0.0579266
453.19	0.0458402	0.119658	0.024325	0.0580548
453.672	0.0452825	0.118915	0.0242273	0.0581808
454.154	0.044729	0.118319	0.0242907	0.0584934
454.636	0.0442324	0.117903	0.0246409	0.0591517
455.118	0.0438603	0.117646	0.0253319	0.0602396
455.6	0.0436701	0.117472	0.0263111	0.0617378
456.082	0.0436766	0.117269	0.0274038	0.063509
456.565	0.0438252	0.116931	0.0283501	0.0653253
457.047	0.043993	0.116391	0.0288751	0.06692
457.529	0.0440355	0.115667	0.0288294	0.0681089
458.011	0.0438544	0.114844	0.0282535	0.0688615
458.493	0.0434413	0.114037	0.0273708	0.0693126
458.975	0.042874	0.113336	0.0264529	0.0696771
459.457	0.0422706	0.112775	0.0257182	0.0701624
459.939	0.0417373	0.112337	0.0252632	0.0709049
460.421	0.0413328	0.111973	0.0250601	0.0719383
460.904	0.0410753	0.111631	0.0250097	0.0732251
461.386	0.0409519	0.111272	0.0249994	0.0746782
461.868	0.0409386	0.110882	0.0249562	0.0762009
462.35	0.0410079	0.110468	0.0248683	0.0777034
462.832	0.0411372	0.110055	0.0247844	0.0791299
463.314	0.0413021	0.109668	0.0247777	0.0804681
463.796	0.0414719	0.10933	0.0249172	0.0817482
464.278	0.0416118	0.109049	0.0252325	0.0830238
464.761	0.0416931	0.108817	0.025711	0.0843428
465.243	0.0417028	0.10862	0.0263128	0.0857262
465.725	0.0416572	0.108434	0.0269935	0.0871458
466.207	0.0415991	0.108234	0.0277228	0.0885242
466.689	0.0415886	0.107998	0.0284936	0.0897405
467.171	0.0416793	0.107717	0.0293242	0.090673
467.653	0.0418969	0.1074	0.0302535	0.0912415
468.135	0.0422341	0.107078	0.0313413	0.0914263
468.618	0.0426664	0.106793	0.0326572	0.0912648
469.1	0.0431755	0.106585	0.0342758	0.0908069
469.582	0.0437687	0.106485	0.0362739	0.090065
470.064	0.0444837	0.106488	0.0387067	0.0889753
470.546	0.0453666	0.106558	0.0415905	0.0873892
471.028	0.0464382	0.10662	0.0448747	0.0850997
471.51	0.0476651	0.106585	0.0484405	0.0819349
471.992	0.048948	0.106378	0.0521103	0.0778318
472.474	0.0501566	0.105968	0.0556918	0.0729106
472.957	0.0512004	0.105388	0.059032	0.0674517
473.439	0.0520741	0.104723	0.0620216	0.0618292
473.921	0.0528694	0.104073	0.0645717	0.0564021
474.403	0.0537231	0.103509	0.0665754	0.0514215
474.885	0.0547765	0.103066	0.0678582	0.0470336
475.367	0.0561235	0.102738	0.0681916	0.0432756
475.849	0.0578018	0.102508	0.0673571	0.0401088
476.331	0.0598226	0.102385	0.0651941	0.0374618
476.813	0.0622206	0.102442	0.0617011	0.0352611
477.296	0.0651017	0.102836	0.0570696	0.0334555
477.778	0.0686875	0.103825	0.0516935	0.0320244
478.26	0.07329	0.105723	0.0460824	0.0309744
478.742	0.0792507	0.108844	0.0407381	0.0303212
479.224	0.0868938	0.11348	0.0360952	0.0300757
479.706	0.0964348	0.119836	0.0324106	0.0302301
480.188	0.107963	0.128026	0.0297695	0.030761
480.67	0.121427	0.138064	0.0281218	0.0316284
481.152	0.136678	0.149878	0.0273287	0.0327854
481.635	0.153488	0.163298	0.027208	0.0341777
482.117	0.171574	0.178048	0.0275549	0.0357354
482.599	0.19068	0.193827	0.0281813	0.0373833
483.081	0.210606	0.210345	0.0289179	0.0390425
483.563	0.231276	0.227429	0.0296294	0.0406461
484.045	0.252762	0.245101	0.030247	0.0421656
484.527	0.275327	0.263608	0.0307659	0.0436154
485.01	0.29941	0.283398	0.0312486	0.0450559
485.492	0.325559	0.30499	0.0317923	0.0465655
485.974	0.354443	0.328928	0.0325055	0.0482202
486.456	0.386775	0.355667	0.033462	0.0500589
486.938	0.423235	0.385523	0.0346789	0.0520701
487.42	0.464386	0.418604	0.0361115	0.0541888
487.902	0.510522	0.454758	0.0376698	0.0563164
488.384	0.561617	0.493569	0.0392512	0.0583502
488.866	0.616973	0.534146	0.0407549	0.0601962
489.349	0.675263	0.575217	0.0421086	0.0617971
489.831	0.734668	0.615304	0.0432724	0.063135
490.313	0.793073	0.652916	0.044227	0.064226
490.795	0.848753	0.687035	0.0449633	0.0651029
491.277	0.900725	0.717296	0.0454722	0.0657936
491.759	0.948836	0.743958	0.0457406	0.0663085
492.241	0.993065	0.767405	0.0457605	0.066634
492.723	1.03291	0.78778	0.0455438	0.0667443
493.205	1.06726	0.804835	0.0451333	0.0666208
493.688	1.09482	0.818129	0.0446004	0.0662722
494.17	1.11523	0.827489	0.0440348	0.0657443
494.652	1.12971	0.833378	0.0435253	0.0651169
495.134	1.14053	0.836776	0.0431302	0.064477
495.616	1.15008	0.838878	0.0428735	0.0639044
496.098	1.15958	0.840569	0.0427405	0.0634507
496.58	1.16853	0.842083	0.0426933	0.0631299
497.062	1.17501	0.843089	0.0426864	0.062926
497.545	1.17685	0.84301	0.0426862	0.0628067
498.027	1.17325	0.841505	0.0426814	0.0627423
498.509	1.16526	0.838716	0.0426853	0.0627142
498.991	1.1553	0.835211	0.0427258	0.0627204
499.473	1.14567	0.831577	0.0428297	0.0627656
499.955	1.13762	0.828085	0.0430093	0.0628466
500.437	1.13067	0.824426	0.0432501	0.0629403
500.919	1.12313	0.819882	0.0435073	0.0629994
501.401	1.11301	0.813674	0.0437096	0.0629589
501.884	1.09937	0.805526	0.0437822	0.0627609
502.366	1.08294	0.795875	0.0436738	0.0623809
502.848	1.06552	0.785655	0.0433747	0.061839
503.33	1.04868	0.775704	0.0429219	0.0611932
503.812	1.03276	0.766316	0.0423826	0.0605149
504.294	1.01668	0.757094	0.041836	0.0598663
504.776	0.998488	0.747164	0.0413407	0.0592746
505.258	0.97622	0.735547	0.040922	0.0587267
505.74	0.948608	0.721484	0.0405583	0.0581672
506.223	0.915532	0.704661	0.0401836	0.057515
506.705	0.877522	0.685014	0.0396999	0.0566787
507.187	0.835134	0.662436	0.0390015	0.0555801
507.669	0.788736	0.636681	0.0380159	0.0541801
508.151	0.738526	0.607393	0.0367179	0.0524836
508.633	0.68513	0.574544	0.0351428	0.0505447
509.115	0.630019	0.538841	0.0333726	0.0484513
509.597	0.575388	0.501797	0.0315241	0.0463199
510.079	0.523755	0.465488	0.0297223	0.0442774
510.562	0.477191	0.431903	0.0280697	0.0424315
511.044	0.437257	0.402735	0.0266459	0.0408715
511.526	0.404604	0.378939	0.0254947	0.0396484
512.008	0.37901	0.360667	0.0246275	0.0387737
512.49	0.359719	0.347503	0.0240347	0.0382289
512.972	0.345594	0.338609	0.0236938	0.0379758
513.454	0.335451	0.333032	0.0235762	0.0379726
513.937	0.328194	0.329851	0.0236489	0.0381816
514.419	0.32299	0.328372	0.0238773	0.0385767
514.901	0.319254	0.328137	0.0242241	0.0391407
515.383	0.316524	0.328811	0.0246435	0.0398522
515.865	0.314431	0.330128	0.0250848	0.0406756
516.347	0.312637	0.33181	0.0254913	0.0415502
516.829	0.310849	0.33356	0.0258032	0.0423875
517.311	0.308919	0.335166	0.0259745	0.0430952
517.793	0.306874	0.336562	0.0259787	0.043596
518.275	0.304899	0.337869	0.0258218	0.0438568
518.758	0.303237	0.339319	0.0255387	0.0438986
519.24	0.302102	0.341172	0.0251884	0.0437941
519.722	0.301637	0.343625	0.0248412	0.0436498
520.204	0.301925	0.346772	0.02456	0.0435726
520.686	0.303086	0.350661	0.0243955	0.0436615
521.168	0.305352	0.355374	0.0243782	0.0439886
521.65	0.309067	0.361076	0.0245181	0.0445923
522.132	0.3147	0.368049	0.0248136	0.0454875
522.615	0.322741	0.376628	0.0252573	0.0466673
523.097	0.333614	0.387111	0.0258405	0.0481102
523.579	0.347611	0.39967	0.0265484	0.0497723
524.061	0.364825	0.414273	0.0273544	0.0515841
524.543	0.38514	0.430679	0.0282156	0.0534532
525.025	0.408151	0.448415	0.0290672	0.0552614
525.507	0.43325	0.466913	0.0298412	0.0568989
525.989	0.459701	0.485603	0.030486	0.058293
526.471	0.486675	0.503942	0.0309822	0.0594248
526.954	0.513366	0.521434	0.0313509	0.0603293
527.436	0.539006	0.53757	0.031638	0.0610714
527.918	0.562866	0.551808	0.0318965	0.0617177
528.4	0.584363	0.563688	0.0321617	0.0623124
528.882	0.603146	0.572975	0.0324448	0.0628737
529.364	0.619201	0.579804	0.0327341	0.063403
529.846	0.632809	0.58464	0.0330122	0.0639022
530.328	0.644416	0.588143	0.0332699	0.0643864
530.811	0.654396	0.590913	0.0335199	0.064889
531.293	0.66284	0.59325	0.0337939	0.0654515
531.775	0.66957	0.595146	0.0341338	0.0661108
532.257	0.674327	0.596393	0.034571	0.0668821
532.739	0.677029	0.596829	0.0351112	0.0677522
533.221	0.677974	0.596497	0.0357284	0.0686834
533.703	0.677799	0.595688	0.0363737	0.0696259
534.185	0.677182	0.594765	0.0369955	0.0705373
534.668	0.676623	0.593991	0.0375521	0.0713871
535.15	0.6762	0.593343	0.038027	0.0721615
535.632	0.675632	0.592542	0.0384303	0.0728584
536.114	0.674487	0.591197	0.0387889	0.0734803
536.596	0.672508	0.58906	0.0391321	0.0740279
537.078	0.669782	0.586186	0.0394804	0.0744999
537.56	0.666711	0.582921	0.0398387	0.0748942
538.042	0.663755	0.579698	0.0401955	0.0752089
538.524	0.661148	0.576812	0.0405303	0.0754429
539.006	0.658764	0.574276	0.040815	0.0755919
539.489	0.656176	0.57183	0.0410242	0.0756479
539.971	0.652898	0.569113	0.0411365	0.0756006
540.453	0.648664	0.565868	0.04114	0.075442
540.935	0.643608	0.562117	0.0410343	0.0751729
541.417	0.638178	0.55813	0.0408339	0.0748074
541.899	0.6329	0.554279	0.0405646	0.0743708
542.381	0.628051	0.550794	0.0402547	0.0738886
542.864	0.623556	0.547659	0.0399282	0.07338
543.346	0.619021	0.544612	0.0395937	0.0728482
543.828	0.614012	0.541319	0.0392409	0.0722816
544.31	0.608278	0.537549	0.0388448	0.071661
544.792	0.601946	0.533327	0.0383784	0.0709748
545.274	0.595424	0.528903	0.0378318	0.0702308
545.756	0.589211	0.524612	0.0372237	0.0694634
546.238	0.583596	0.520664	0.0366054	0.0687263
546.72	0.578526	0.517021	0.0360438	0.0680742
547.202	0.573644	0.51342	0.0356073	0.0675476
547.685	0.568523	0.509532	0.0353341	0.0671551
548.167	0.56291	0.505166	0.0352176	0.0668723
548.649	0.556846	0.500371	0.0352076	0.0666493
549.131	0.550624	0.49541	0.035226	0.0664304
549.613	0.544584	0.490593	0.0351958	0.0661734
550.095	0.538912	0.486119	0.0350597	0.0658573
550.577	0.533517	0.481951	0.0347968	0.0654826
551.059	0.528093	0.477854	0.0344208	0.0650627
551.542	0.52228	0.473521	0.0339668	0.0646097
552.024	0.515886	0.468767	0.0334721	0.0641255
552.506	0.508971	0.463613	0.0329639	0.0636002
552.988	0.501791	0.458274	0.0324569	0.0630195
553.47	0.494607	0.453005	0.0319568	0.0623771
553.952	0.487537	0.447962	0.0314716	0.0616825
554.434	0.480463	0.443104	0.0310171	0.0609654
554.916	0.473122	0.43822	0.0306133	0.0602657
555.399	0.46525	0.433044	0.0302794	0.0596243
555.881	0.456765	0.42741	0.0300192	0.0590667
556.363	0.447823	0.421343	0.0298165	0.0585944
556.845	0.438743	0.41503	0.0296352	0.0581849
557.327	0.42983	0.408707	0.0294296	0.0577987
557.809	0.421205	0.402508	0.0291594	0.0573945
558.291	0.412758	0.396412	0.0287959	0.0569346
558.773	0.4042	0.390246	0.0283281	0.0563938
559.255	0.39524	0.383806	0.0277593	0.0557609
559.737	0.3857	0.376952	0.0271023	0.0550358
560.22	0.375613	0.36969	0.0263735	0.0542269
560.702	0.365155	0.36214	0.0255916	0.0533488
561.184	0.354523	0.354456	0.0247828	0.0524245
561.666	0.343806	0.346711	0.023982	0.0514839
562.148	0.332934	0.338853	0.0232326	0.0505624
562.63	0.321717	0.33073	0.0225813	0.0496998
563.112	0.309969	0.322177	0.0220632	0.0489281
563.595	0.297588	0.313102	0.0216878	0.0482633
564.077	0.284597	0.303519	0.021434	0.0477007
564.559	0.271102	0.293522	0.0212545	0.0472143
565.041	0.257202	0.283213	0.0210871	0.0467637
565.523	0.242933	0.272636	0.0208714	0.0463027
566.005	0.228263	0.26177	0.0205669	0.0457942
566.487	0.213166	0.250572	0.0201547	0.0452127
566.969	0.197709	0.239067	0.0196392	0.0445506
567.451	0.182113	0.227396	0.0190388	0.043816
567.933	0.166747	0.215839	0.0183799	0.0430297
568.416	0.15205	0.204751	0.0176875	0.0422189
568.898	0.138395	0.194448	0.0169819	0.0414102
569.38	0.12606	0.185171	0.0162807	0.0406291
569.862	0.11517	0.177027	0.015601	0.0398965
570.344	0.105717	0.170005	0.0149586	0.0392275
570.826	0.0976178	0.164022	0.0143697	0.0386339
571.308	0.0907442	0.158966	0.0138483	0.0381224
571.79	0.08496	0.154732	0.0134054	0.0376973
572.273	0.0801234	0.151225	0.0130516	0.0373617
572.755	0.0760932	0.148361	0.012798	0.0371186
573.237	0.0727262	0.146048	0.012652	0.0369678
573.719	0.069876	0.144175	0.012614	0.0369021
574.201	0.0674082	0.142626	0.0126669	0.0369023
574.683	0.0652167	0.141292	0.0127705	0.0369339
575.165	0.0632322	0.140093	0.0128581	0.0369481
575.647	0.0614306	0.139004	0.0128581	0.0368981
576.13	0.05982	0.138036	0.0127106	0.0367492
576.612	0.058413	0.137221	0.0123903	0.0364929
577.094	0.057207	0.136573	0.0119178	0.03615
577.576	0.0561715	0.136072	0.0113524	0.0357638
578.058	0.0552544	0.135653	0.0107735	0.0353864
578.54	0.0544025	0.135242	0.01025	0.0350584
579.022	0.0535774	0.13477	0.00982636	0.0348033
579.504	0.0527693	0.134208	0.00951155	0.0346216
579.986	0.0519937	0.133569	0.00928628	0.0344981
580.469	0.0512812	0.132899	0.00911862	0.0344116
580.951	0.0506558	0.132255	0.00898373	0.0343485
581.433	0.0501226	0.131674	0.00887547	0.034307
581.915	0.0496666	0.131165	0.00880523	0.034297
582.397	0.0492617	0.130722	0.00879026	0.0343326
582.879	0.0488862	0.13033	0.00883976	0.034422
583.361	0.0485301	0.129991	0.00894487	0.0345643
583.843	0.0481974	0.129716	0.00907822	0.0347485
584.326	0.0478965	0.129523	0.00920464	0.0349581
584.808	0.0476312	0.129418	0.00928859	0.0351748
585.29	0.0473934	0.129387	0.00930818	0.0353832
585.772	0.0471665	0.129392	0.0092566	0.0355709
586.254	0.0469352	0.129385	0.00914197	0.0357286
586.736	0.0466966	0.129333	0.00898082	0.0358495
587.218	0.0464649	0.129229	0.00879533	0.0359323
587.7	0.0462673	0.12909	0.00861292	0.0359833
588.182	0.0461287	0.128951	0.00846393	0.0360186
588.665	0.0460593	0.128837	0.00838123	0.0360633
589.147	0.0460457	0.128753	0.00839444	0.0361457
589.629	0.046056	0.128681	0.00851583	0.0362862
590.111	0.0460485	0.128589	0.0087322	0.0364891
590.593	0.045991	0.128449	0.00899733	0.0367369
591.075	0.0458738	0.128256	0.00924573	0.0369955
591.557	0.045711	0.128028	0.00940521	0.0372229
592.039	0.0455326	0.127796	0.00942573	0.0373867
592.521	0.0453662	0.127589	0.00929722	0.037477
593.004	0.0452259	0.127416	0.00905227	0.0375081
593.486	0.0451086	0.127263	0.00875239	0.0375122
593.968	0.0450001	0.127109	0.00846082	0.0375257
594.45	0.0448866	0.126935	0.00822681	0.0375766
594.932	0.0447645	0.126739	0.00806678	0.0376752
595.414	0.0446413	0.126535	0.00796887	0.0378145
595.896	0.0445303	0.126346	0.00790479	0.0379758
596.378	0.0444428	0.126189	0.0078479	0.0381397
596.861	0.0443795	0.126063	0.00778367	0.0382922
597.343	0.0443305	0.125953	0.00771324	0.0384287
597.825	0.0442837	0.125838	0.00764603	0.038552
598.307	0.0442351	0.125704	0.00759062	0.0386678
598.789	0.044197	0.125559	0.00754882	0.038783
599.271	0.0441961	0.125426	0.00751524	0.0389027
599.753	0.0442664	0.125334	0.00748466	0.0390323
600.235	0.0444351	0.125306	0.00745951	0.0391811
600.717	0.0447079	0.125337	0.00745247	0.0393601
601.2	0.0450658	0.125406	0.0074823	0.0395809
601.682	0.0454687	0.125476	0.00756324	0.0398504
602.164	0.0458724	0.125522	0.00769337	0.0401653
602.646	0.0462378	0.125534	0.00785114	0.0405113
603.128	0.0465439	0.125524	0.00800002	0.040865
603.61	0.04679	0.125512	0.00810311	0.041202
604.092	0.0469912	0.125518	0.00813403	0.0415019
604.574	0.0471729	0.125545	0.00808822	0.0417544
605.057	0.0473625	0.125585	0.00798089	0.041962
605.539	0.047588	0.125619	0.00784186	0.0421374
606.021	0.0478741	0.125637	0.00770063	0.0422988
606.503	0.0482389	0.125643	0.00757673	0.0424638
606.985	0.0486943	0.125658	0.00747927	0.042648
607.467	0.0492409	0.125706	0.00741051	0.0428629
607.949	0.0498681	0.125804	0.0073732	0.0431171
608.431	0.0505543	0.125956	0.00737589	0.0434179
608.913	0.0512739	0.126148	0.00743171	0.0437708
609.396	0.0520052	0.126363	0.0075503	0.0441773
609.878	0.0527378	0.12659	0.00773162	0.0446338
610.36	0.0534767	0.126836	0.00796229	0.045131
610.842	0.0542384	0.127119	0.00821952	0.0456556
611.324	0.0550448	0.127467	0.00847987	0.0461928
611.806	0.0559141	0.127896	0.00873166	0.0467314
612.288	0.056858	0.128413	0.00897839	0.0472656
612.77	0.057883	0.129007	0.00923781	0.0477956
613.253	0.0589965	0.129669	0.00952994	0.0483253
613.735	0.0602127	0.130396	0.00986771	0.0488587
614.217	0.0615552	0.131202	0.0102466	0.0493956
614.699	0.06305	0.132112	0.0106474	0.0499309
615.181	0.0647198	0.133149	0.0110406	0.0504537
615.663	0.0665737	0.134322	0.0114009	0.0509518
616.145	0.0686058	0.135615	0.0117161	0.0514159
616.627	0.0708003	0.136999	0.0119901	0.0518425
617.109	0.0731469	0.138442	0.0122396	0.0522356
617.592	0.0756533	0.139939	0.0124838	0.052603
618.074	0.0783538	0.141516	0.0127359	0.0529518
618.556	0.0813016	0.143233	0.0129979	0.0532814
619.038	0.0845538	0.145156	0.0132641	0.0535821
619.52	0.0881628	0.147351	0.0135268	0.0538336
620.002	0.0921647	0.14986	0.0137846	0.054013
620.484	0.0965882	0.152704	0.0140468	0.0541026
620.966	0.101476	0.1559	0.0143318	0.0540937
621.448	0.106899	0.159485	0.0146615	0.0539912
621.931	0.112978	0.163528	0.0150545	0.0538102
622.413	0.119882	0.16814	0.015521	0.0535683
622.895	0.127801	0.173455	0.0160605	0.0532782
623.377	0.136937	0.179614	0.0166633	0.0529432
623.859	0.147477	0.186753	0.0173099	0.0525566
624.341	0.159586	0.194989	0.0179769	0.052107
624.823	0.173431	0.20444	0.0186348	0.0515835
625.305	0.189197	0.215242	0.0192515	0.0509831
625.788	0.207106	0.227545	0.0197972	0.0503129
626.27	0.227412	0.241518	0.0202449	0.0495894
626.752	0.250337	0.257283	0.0205745	0.0488364
627.234	0.27599	0.274854	0.0207749	0.0480783
627.716	0.304211	0.294037	0.0208416	0.0473402
628.198	0.334451	0.314358	0.0207754	0.0466437
628.68	0.365746	0.335087	0.0205785	0.0460036
629.162	0.396508	0.355146	0.0202528	0.0454289
629.644	0.424629	0.373231	0.0197988	0.0449201
630.127	0.447634	0.387929	0.01922	0.0444726
630.609	0.462751	0.39773	0.0185263	0.0440772
631.091	0.46757	0.401336	0.0177395	0.0437255
631.573	0.460701	0.397929	0.0168912	0.0434118
632.055	0.442282	0.387414	0.0160225	0.0431342
632.537	0.41414	0.370578	0.01517	0.0428933
633.019	0.379226	0.348929	0.014358	0.042691
633.501	0.340881	0.324398	0.0135928	0.0425262
633.984	0.301936	0.298798	0.012864	0.0423941
634.466	0.264506	0.273629	0.0121541	0.0422873
634.948	0.229984	0.249981	0.0114503	0.0421978
635.43	0.199052	0.22846	0.0107538	0.0421217
635.912	0.171989	0.209374	0.0100824	0.042061
636.394	0.14878	0.192801	0.00946474	0.0420246
636.876	0.129182	0.178644	0.00892731	0.0420249
637.358	0.112832	0.166712	0.00848616	0.0420739
637.841	0.0992895	0.156745	0.00814048	0.0421778
638.323	0.0881064	0.148463	0.00787611	0.0423341
638.805	0.0788507	0.141573	0.00767102	0.0425303
639.287	0.0711485	0.135802	0.00750313	0.0427472
639.769	0.0647096	0.130925	0.00735672	0.0429645
640.251	0.0592993	0.126751	0.00722204	0.0431649
640.733	0.0547402	0.123143	0.00709437	0.0433403
641.215	0.0508971	0.120009	0.00697173	0.0434923
641.697	0.0476475	0.117281	0.00685356	0.0436296
642.179	0.0448839	0.114904	0.00674101	0.0437643
642.662	0.0425126	0.11283	0.00663936	0.0439058
643.144	0.0404492	0.111007	0.00655697	0.0440596
643.626	0.038631	0.109389	0.00650343	0.0442256
644.108	0.0370165	0.107936	0.00648392	0.0444008
644.59	0.0355804	0.106624	0.00649613	0.0445804
645.072	0.0343109	0.10544	0.00652811	0.0447602
645.554	0.0331999	0.104376	0.00656158	0.0449355
646.036	0.0322366	0.103421	0.00657736	0.0451005
646.519	0.031405	0.102554	0.00656283	0.0452462
647.001	0.0306843	0.101742	0.00651597	0.0453621
647.483	0.0300515	0.100954	0.00644672	0.0454385
647.965	0.0294885	0.100165	0.00637133	0.0454713
648.447	0.0289834	0.0993725	0.0063091	0.0454652
648.929	0.0285318	0.098596	0.00627578	0.045434
649.411	0.028135	0.0978677	0.00628036	0.0453961
649.893	0.0277957	0.0972213	0.00632618	0.0453694
650.375	0.0275137	0.0966785	0.0064139	0.045366
650.858	0.027285	0.0962412	0.00654184	0.0453881
651.34	0.0271006	0.0958931	0.00670635	0.0454298
651.822	0.0269503	0.0956083	0.00690083	0.0454806
652.304	0.0268253	0.0953629	0.00711428	0.0455297
652.786	0.0267206	0.0951406	0.00733242	0.0455692
653.268	0.0266358	0.094935	0.00754059	0.0455956
653.75	0.0265742	0.0947444	0.00772882	0.0456067
654.232	0.0265391	0.094565	0.00789359	0.0455993
654.715	0.026533	0.0943868	0.00803978	0.045568
655.197	0.0265552	0.0941953	0.00817687	0.0455054
655.679	0.0266023	0.0939767	0.0083156	0.0454049
656.161	0.0266703	0.093726	0.00846275	0.0452634
656.643	0.0267543	0.0934493	0.00861846	0.045082
657.125	0.0268494	0.093163	0.00877747	0.0448645
657.607	0.0269499	0.0928845	0.00893239	0.0446151
658.089	0.027048	0.0926267	0.00907802	0.0443379
658.572	0.0271334	0.0923934	0.00921476	0.0440373
659.054	0.0271961	0.0921789	0.00934918	0.04372
659.536	0.0272289	0.0919738	0.00949295	0.0433981
660.018	0.0272299	0.0917695	0.009659	0.0430876
660.5	0.0272038	0.0915632	0.00985686	0.0428038
660.982	0.0271594	0.091356	0.0100885	0.0425563
661.464	0.0271059	0.0911513	0.0103469	0.0423425
661.946	0.0270488	0.0909505	0.0106166	0.0421468
662.428	0.02699	0.0907543	0.0108753	0.0419437
662.91	0.0269284	0.0905645	0.0111013	0.0417084
663.393	0.0268641	0.0903865	0.0112825	0.041429
663.875	0.0268024	0.0902308	0.0114225	0.0411129
664.357	0.026755	0.0901088	0.0115451	0.040787
664.839	0.0267407	0.0900253	0.0116907	0.0404894
665.321	0.0267829	0.0899726	0.0119177	0.0402649
665.803	0.0269054	0.0899219	0.0122922	0.0401505
666.285	0.0271247	0.0898197	0.0128753	0.0401629
666.768	0.0274326	0.0895897	0.0136881	0.0402744
667.25	0.0277774	0.0891678	0.0146608	0.0403942
667.732	0.0280649	0.0885561	0.0156071	0.0403809
668.214	0.0281961	0.0878599	0.0162853	0.0401068
668.696	0.028142	0.0872322	0.0165577	0.0395533
669.178	0.0279539	0.0867785	0.0164623	0.0388066
669.66	0.0277182	0.0865136	0.0161468	0.0379839
670.142	0.0275032	0.0863898	0.0157597	0.0371692
670.624	0.0273495	0.0863392	0.0154069	0.0364052
671.107	0.0272724	0.0863021	0.0151464	0.035706
671.589	0.0272698	0.0862412	0.0149958	0.0350675
672.071	0.0273302	0.0861408	0.0149491	0.0344814
672.553	0.0274362	0.0860061	0.0149838	0.0339375
673.035	0.0275705	0.0858548	0.0150723	0.0334244
673.517	0.0277184	0.085707	0.0151898	0.0329304
673.999	0.0278719	0.0855741	0.0153202	0.0324439
674.481	0.0280273	0.0854552	0.0154597	0.0319555
674.963	0.028183	0.0853404	0.0156124	0.0314607
675.446	0.028336	0.0852193	0.0157855	0.0309618
675.928	0.0284796	0.0850889	0.0159869	0.0304689
676.41	0.0286062	0.0849547	0.0162228	0.0299984
676.892	0.028709	0.0848282	0.0164988	0.029568
677.374	0.0287869	0.084719	0.0168177	0.0291904
677.856	0.028845	0.0846303	0.0171817	0.028871
678.338	0.0288936	0.0845567	0.0175876	0.0286049
678.82	0.0289439	0.0844894	0.0180284	0.0283814
679.303	0.0290052	0.0844205	0.0184912	0.0281862
679.785	0.0290813	0.084349	0.0189637	0.0280086
680.267	0.02917	0.08428	0.0194374	0.027844
680.749	0.0292652	0.084221	0.0199121	0.0276953
681.231	0.0293608	0.0841744	0.0203955	0.0275692
681.713	0.0294528	0.0841358	0.0209006	0.0274742
682.195	0.0295408	0.0840922	0.0214397	0.0274171
682.677	0.0296268	0.0840298	0.022019	0.0274014
683.159	0.0297143	0.0839383	0.022639	0.0274297
683.642	0.0298044	0.0838171	0.0232975	0.0275072
684.124	0.0298962	0.0836746	0.0239959	0.0276442
684.606	0.0299862	0.0835236	0.0247446	0.027858
685.088	0.030071	0.083376	0.0255637	0.0281733
685.57	0.030148	0.0832374	0.026478	0.028617
686.052	0.0302173	0.0831067	0.0275117	0.0292185
686.534	0.0302802	0.0829802	0.0286809	0.0300075
687.016	0.0303382	0.0828549	0.0299918	0.0310144
687.499	0.0303913	0.0827329	0.0314467	0.0322801
687.981	0.0304363	0.0826187	0.0330525	0.0338619
688.463	0.0304693	0.0825161	0.0348312	0.0358405
688.945	0.0304868	0.0824235	0.0368326	0.0383417
689.427	0.0304898	0.0823324	0.0391355	0.041536
689.909	0.0304834	0.08223	0.0418456	0.0456411
690.391	0.0304773	0.0821048	0.045107	0.0509447
690.873	0.0304818	0.0819524	0.0490845	0.0577693
691.356	0.0305047	0.0817786	0.0539638	0.0664589
691.837	0.0305466	0.0815971	0.0599494	0.0773572
692.32	0.0306016	0.0814221	0.0672241	0.0907326
692.802	0.0306573	0.081263	0.0759234	0.106725
693.284	0.0306989	0.0811198	0.0860812	0.125252
693.766	0.0307145	0.0809848	0.0975903	0.145977
694.248	0.0306987	0.0808473	0.110148	0.168215
694.73	0.0306536	0.0807002	0.123228	0.190894
695.212	0.0305868	0.0805441	0.136164	0.212736
695.694	0.0305089	0.0803862	0.148151	0.232267
696.177	0.0304291	0.0802357	0.158373	0.248085
696.659	0.030353	0.0800982	0.166171	0.259158
697.141	0.0302817	0.0799717	0.171078	0.264924
697.623	0.0302138	0.0798475	0.172914	0.26541
698.105	0.0301474	0.0797154	0.171776	0.261118
698.587	0.0300826	0.0795683	0.167996	0.252916
699.069	0.0300213	0.0794059	0.162053	0.241801
699.551	0.0299664	0.0792345	0.154463	0.228709
700.034	0.0299207	0.0790632	0.145752	0.214483
700.516	0.0298852	0.0788981	0.136367	0.199774
700.998	0.0298585	0.0787397	0.12666	0.185039
701.48	0.0298381	0.0785842	0.116912	0.170619
701.962	0.0298215	0.078427	0.107325	0.156733
702.444	0.0298086	0.0782689	0.09804	0.143521
702.926	0.0298023	0.0781178	0.0891716	0.131087
703.408	0.0298071	0.0779875	0.0807994	0.119486
703.89	0.0298282	0.0778928	0.072984	0.108748
704.373	0.0298689	0.0778434	0.0657717	0.0988805
704.855	0.0299291	0.077839	0.059188	0.0898639
705.337	0.0300049	0.0778702	0.0532406	0.0816608
705.819	0.0300894	0.0779221	0.0479183	0.0742164
706.301	0.0301755	0.077981	0.0431919	0.0674652
706.783	0.0302576	0.0780389	0.0390193	0.061335
707.265	0.0303339	0.0780948	0.0353514	0.0557547
707.747	0.0304067	0.0781535	0.0321432	0.0506649
708.23	0.0304825	0.0782206	0.029356	0.0460188
708.712	0.0305685	0.0783009	0.0269606	0.0417864
709.194	0.0306712	0.0783959	0.0249348	0.0379509
709.676	0.0307931	0.0785065	0.0232549	0.0345017
710.158	0.0309314	0.078635	0.0218912	0.0314275
710.64	0.0310793	0.0787851	0.0208063	0.0287117
711.122	0.0312256	0.0789608	0.0199549	0.0263306
711.604	0.0313599	0.0791635	0.0192914	0.0242561
712.086	0.031475	0.079388	0.0187791	0.0224612
712.569	0.0315686	0.0796218	0.0183901	0.020921
713.051	0.0316427	0.0798492	0.0181088	0.0196147
713.533	0.0317028	0.0800548	0.0179273	0.0185229
714.015	0.0317546	0.08023	0.0178386	0.017622
714.497	0.0318007	0.0803752	0.0178328	0.0168841
714.979	0.0318398	0.0804981	0.0178957	0.0162773
715.461	0.0318668	0.0806079	0.0180088	0.0157675
715.943	0.0318754	0.0807099	0.0181545	0.0153265
716.426	0.0318618	0.0808008	0.0183177	0.0149341
716.908	0.0318262	0.0808692	0.0184864	0.0145777
717.39	0.0317741	0.0809006	0.0186526	0.0142517
717.872	0.0317143	0.0808817	0.0188092	0.0139525
718.354	0.0316564	0.0808045	0.0189501	0.0136751
718.836	0.031606	0.0806687	0.0190721	0.0134141
719.318	0.0315636	0.080478	0.0191756	0.0131644
719.8	0.0315233	0.0802384	0.0192679	0.0129259
720.283	0.031476	0.0799538	0.0193608	0.0127046
720.764	0.0314109	0.0796281	0.019468	0.0125117
721.247	0.0313206	0.0792661	0.0195994	0.012359
721.729	0.0312012	0.0788767	0.019757	0.0122536
722.211	0.0310545	0.0784728	0.0199331	0.0121939
722.693	0.0308857	0.0780691	0.0201127	0.0121688
723.175	0.030703	0.0776769	0.0202787	0.0121622
723.657	0.0305164	0.0773012	0.0204157	0.0121557
724.139	0.0303359	0.0769388	0.0205142	0.0121353
724.621	0.0301702	0.076581	0.0205717	0.0120948
725.104	0.0300274	0.0762186	0.0205907	0.0120357
725.586	0.0299113	0.0758472	0.0205772	0.0119656
726.068	0.0298224	0.0754713	0.0205381	0.0118963
726.55	0.0297579	0.0751029	0.0204825	0.0118413
727.032	0.0297123	0.0747565	0.0204201	0.0118138
727.514	0.0296804	0.0744441	0.0203629	0.0118263
727.996	0.0296587	0.0741708	0.0203242	0.0118898
728.478	0.0296458	0.0739341	0.0203152	0.0120126
728.961	0.0296419	0.0737258	0.020342	0.012198
729.443	0.0296459	0.0735359	0.0204029	0.0124444
729.925	0.0296541	0.0733573	0.0204897	0.0127469
730.407	0.0296578	0.0731857	0.02059	0.0130989
730.889	0.0296454	0.0730179	0.0206927	0.0134968
731.371	0.029606	0.0728513	0.0207931	0.0139436
731.853	0.0295331	0.0726797	0.0208936	0.014448
732.335	0.0294285	0.0724952	0.0210028	0.015023
732.817	0.0293017	0.0722903	0.0211301	0.0156794
733.3	0.0291693	0.0720611	0.0212822	0.0164226
733.782	0.0290479	0.0718084	0.0214596	0.0172483
734.264	0.0289491	0.0715381	0.0216574	0.0181441
734.746	0.0288768	0.0712588	0.021869	0.0190918
735.228	0.0288263	0.0709786	0.0220893	0.0200736
735.71	0.0287883	0.0707026	0.0223192	0.0210775
736.192	0.0287521	0.0704334	0.0225646	0.0220988
736.674	0.0287116	0.0701717	0.0228344	0.0231406
737.157	0.0286663	0.0699185	0.0231363	0.02421
737.639	0.0286215	0.0696756	0.0234742	0.0253156
738.121	0.0285844	0.0694441	0.0238466	0.0264631
738.603	0.0285607	0.0692235	0.0242486	0.0276546
739.085	0.0285519	0.0690093	0.0246752	0.0288887
739.567	0.0285549	0.0687937	0.0251238	0.030163
740.049	0.0285628	0.0685679	0.025596	0.0314759
740.531	0.0285684	0.0683256	0.0260982	0.032829
741.013	0.0285656	0.0680656	0.026639	0.0342271
741.496	0.0285513	0.0677919	0.0272264	0.0356769
741.978	0.0285249	0.0675122	0.0278671	0.0371853
742.46	0.0284871	0.0672324	0.0285636	0.0387552
742.942	0.0284392	0.0669541	0.0293137	0.0403836
743.424	0.0283821	0.0666729	0.0301105	0.0420596
743.906	0.0283167	0.066381	0.0309413	0.0437649
744.388	0.0282437	0.0660704	0.0317882	0.0454736
744.87	0.0281639	0.0657383	0.0326283	0.0471552
745.352	0.0280785	0.0653875	0.0334392	0.0487796
745.835	0.0279879	0.0650266	0.034198	0.0503168
746.317	0.0278925	0.0646657	0.0348876	0.051741
746.799	0.0277929	0.0643116	0.0354985	0.0530339
747.281	0.0276906	0.0639664	0.0360276	0.0541834
747.763	0.0275894	0.0636274	0.0364792	0.0551877
748.245	0.0274953	0.0632906	0.0368619	0.0560547
748.727	0.0274166	0.0629537	0.0371861	0.0568023
749.21	0.027361	0.0626196	0.0374628	0.057455
749.692	0.0273348	0.0622951	0.0377014	0.0580391
750.174	0.0273403	0.0619905	0.0379121	0.0585808
750.656	0.027377	0.0617139	0.0381041	0.0591005
751.138	0.0274415	0.0614706	0.0382879	0.0596129
751.62	0.0275304	0.0612612	0.038475	0.0601276
752.102	0.0276413	0.061083	0.0386757	0.0606508
752.584	0.0277744	0.060932	0.0388983	0.061186
753.066	0.0279309	0.0608045	0.0391476	0.0617362
753.548	0.0281127	0.0606978	0.0394235	0.0623017
754.031	0.0283209	0.0606092	0.0397209	0.0628782
754.513	0.0285535	0.0605351	0.040029	0.0634555
754.995	0.0288074	0.0604713	0.0403346	0.0640181
755.477	0.0290772	0.0604119	0.0406202	0.0645435
755.959	0.0293563	0.0603526	0.040867	0.0650068
756.441	0.0296382	0.0602912	0.0410577	0.065384
756.923	0.029915	0.0602268	0.0411773	0.0656525
757.405	0.0301779	0.060159	0.0412153	0.065794
757.888	0.0304176	0.060086	0.0411673	0.0657949
758.37	0.0306244	0.0600026	0.0410331	0.0656455
758.852	0.0307895	0.0599014	0.0408165	0.065341
759.334	0.0309085	0.0597744	0.0405205	0.06488
759.816	0.0309807	0.0596157	0.0401464	0.0642655
760.298	0.0310109	0.0594247	0.0396915	0.0635024
760.78	0.0310067	0.0592051	0.0391503	0.0625969
761.262	0.0309772	0.0589636	0.0385162	0.0615555
761.745	0.0309299	0.058706	0.0377862	0.060384
762.227	0.0308702	0.0584356	0.0369634	0.0590904
762.709	0.0308015	0.0581521	0.0360589	0.0576863
763.191	0.0307256	0.0578541	0.0350898	0.0561879
763.673	0.0306453	0.0575409	0.0340753	0.0546156
764.155	0.0305638	0.0572148	0.0330332	0.0529928
764.637	0.0304849	0.0568807	0.0319742	0.051339
765.119	0.0304104	0.0565436	0.0309026	0.0496685
765.601	0.0303395	0.0562051	0.0298169	0.0479886
766.083	0.030268	0.0558614	0.0287136	0.0462992
766.566	0.0301886	0.0555037	0.0275909	0.0445985
767.048	0.0300929	0.0551208	0.0264503	0.0428859
767.53	0.0299742	0.0547062	0.0252979	0.0411651
768.012	0.029829	0.0542591	0.0241418	0.0394451
768.494	0.0296582	0.0537881	0.0229912	0.0377392
768.976	0.0294662	0.0533067	0.0218536	0.0360612
769.458	0.0292603	0.0528304	0.0207362	0.0344255
769.94	0.029049	0.0523705	0.0196454	0.0328441
770.423	0.0288399	0.0519318	0.0185876	0.0313266
770.905	0.0286403	0.0515128	0.0175689	0.0298808
771.387	0.0284558	0.0511091	0.0165947	0.0285124
771.869	0.0282898	0.0507166	0.0156682	0.027224
772.351	0.0281443	0.0503347	0.0147909	0.0260155
772.833	0.0280193	0.0499664	0.013962	0.0248832
773.315	0.0279126	0.0496164	0.0131799	0.0238202
773.797	0.0278217	0.049289	0.0124424	0.0228172
774.279	0.0277441	0.0489854	0.0117466	0.021864
774.762	0.0276782	0.0487043	0.0110876	0.0209505
775.244	0.0276238	0.0484425	0.0104577	0.0200673
775.726	0.0275824	0.0481977	0.00984751	0.0192078
776.208	0.0275557	0.0479695	0.00924756	0.0183681
776.69	0.0275452	0.0477587	0.00865212	0.0175486
777.172	0.0275509	0.0475665	0.00806236	0.0167542
777.654	0.0275716	0.0473927	0.00748773	0.0159944
778.136	0.0276044	0.0472341	0.00694385	0.0152803
778.619	0.0276463	0.0470869	0.00644645	0.0146225
779.101	0.0276937	0.0469474	0.00600771	0.0140288
779.583	0.0277429	0.0468146	0.00563022	0.0135005
780.065	0.0277902	0.0466912	0.00530717	0.0130335
780.547	0.0278319	0.0465827	0.00502404	0.0126183
781.029	0.027864	0.0464948	0.00476417	0.0122437
781.511	0.0278834	0.046431	0.00451417	0.0118996
781.993	0.0278884	0.0463921	0.00426575	0.0115784
782.476	0.0278793	0.0463758	0.00401593	0.0112754
782.958	0.0278592	0.04638	0.00376479	0.0109883
783.44	0.0278333	0.0464044	0.00351252	0.0107154
783.922	0.0278077	0.0464524	0.00325817	0.0104549
784.404	0.0277884	0.0465298	0.00300016	0.0102049
784.886	0.0277804	0.0466435	0.00273866	0.00996381
785.368	0.0277872	0.0467986	0.00247739	0.00973239
785.85	0.027811	0.0469975	0.00222394	0.00951307
786.332	0.0278529	0.0472397	0.00198808	0.00931042
786.815	0.027913	0.0475245	0.001778	0.00912935
787.297	0.0279903	0.047852	0.00159684	0.00897352
787.779	0.0280821	0.0482236	0.00144223	0.00884436
788.261	0.0281842	0.0486412	0.00130735	0.0087411
788.743	0.0282911	0.0491048	0.00118423	0.00866193
789.225	0.0283968	0.0496091	0.0010666	0.00860396
789.707	0.0284964	0.0501446	0.000952654	0.00856496
790.189	0.0285863	0.0506974	0.00084355	0.00854252
790.672	0.0286649	0.0512529	0.000741344	0.00853323
791.154	0.0287319	0.0517997	0.000646595	0.00853252
791.636	0.0287877	0.0523298	0.00055598	0.0085336
792.118	0.0288325	0.0528372	0.000463461	0.0085284
792.6	0.0288654	0.0533158	0.000362538	0.00850897
793.082	0.0288855	0.0537551	0.000248046	0.00846852
793.564	0.0288926	0.0541413	0.000118967	0.00840342
794.046	0.0288873	0.0544586	-2.20667e-05	0.00831364
794.528	0.0288711	0.0546934	-0.000169348	0.00820331
795.01	0.0288462	0.0548387	-0.00031605	0.00807964
795.493	0.0288131	0.054895	-0.000455553	0.00795169
795.975	0.0287715	0.0548686	-0.00058118	0.00782979
796.457	0.0287197	0.054767	-0.000685896	0.00772312
796.939	0.0286564	0.0545944	-0.000763797	0.00763783
797.421	0.0285829	0.0543498	-0.000809836	0.00757572
797.903	0.0285031	0.0540289	-0.000822502	0.00753263
798.385	0.0284239	0.0536268	-0.000806165	0.00749875
798.867	0.0283527	0.0531431	-0.000771437	0.00745887
799.35	0.0282947	0.0525841	-0.000732208	0.00739787
799.832	0.0282504	0.0519621	-0.000702999	0.0073026
800.314	0.0282146	0.051293	-0.000694729	0.00716645
800.796	0.0281793	0.0505912	-0.000710409	0.00699156
801.278	0.0281347	0.0498683	-0.000746464	0.00678783
801.76	0.0280738	0.0491334	-0.000793828	0.00657124
802.242	0.0279937	0.048393	-0.000843436	0.00635778
802.724	0.0278969	0.047655	-0.000887648	0.00616177
803.207	0.0277881	0.0469277	-0.000924647	0.00599044
803.689	0.0276723	0.0462193	-0.000955858	0.00584433
804.171	0.0275526	0.0455354	-0.000985348	0.00571741
804.653	0.0274283	0.0448769	-0.00101655	0.00560018
805.135	0.0272972	0.0442388	-0.001051	0.00548336
805.617	0.0271555	0.0436124	-0.00108914	0.00535936
806.099	0.0270012	0.0429894	-0.00113078	0.0052244
806.581	0.0268346	0.0423655	-0.00117622	0.00507885
807.063	0.0266579	0.0417427	-0.00122661	0.00492718
807.545	0.0264746	0.0411291	-0.00128268	0.00477583
808.028	0.0262898	0.040535	-0.00134316	0.00463257
808.51	0.0261074	0.0399713	-0.0014041	0.00450533
808.992	0.0259316	0.0394447	-0.00145958	0.00440022
809.474	0.025766	0.0389576	-0.001504	0.00432096
809.956	0.0256127	0.0385091	-0.00153398	0.004269
810.438	0.0254716	0.0380972	-0.00154996	0.00424316
810.92	0.0253389	0.0377202	-0.00155524	0.00424116
811.403	0.0252074	0.0373763	-0.00155435	0.00425946
811.885	0.0250675	0.0370634	-0.00154976	0.00429469
812.367	0.0249094	0.036776	-0.00154111	0.00434258
812.849	0.0247264	0.0365057	-0.00152543	0.00439831
813.331	0.0245179	0.0362433	-0.00149974	0.00445662
813.813	0.02429	0.0359815	-0.00146417	0.00451203
814.295	0.0240548	0.0357189	-0.00142296	0.00456021
814.777	0.023826	0.0354619	-0.00138405	0.00459942
815.26	0.0236171	0.0352243	-0.00135647	0.004631
815.742	0.0234369	0.035023	-0.00134666	0.00465883
816.224	0.0232885	0.0348723	-0.00135575	0.00468719
816.706	0.0231706	0.0347811	-0.00138016	0.00471831
817.188	0.0230792	0.0347505	-0.00141388	0.00475037
817.67	0.0230097	0.0347762	-0.00145232	0.0047777
818.152	0.0229584	0.0348525	-0.00149498	0.00479238
818.634	0.0229227	0.0349771	-0.00154619	0.00478856
819.116	0.0229001	0.0351542	-0.00161285	0.00476591
819.598	0.0228874	0.0353962	-0.00169983	0.00473369
820.081	0.0228802	0.0357197	-0.00180648	0.00470873
820.563	0.0228734	0.036144	-0.00192516	0.00471289
821.045	0.0228622	0.0366892	-0.00204129	0.00476883
821.527	0.0228435	0.0373718	-0.00213985	0.00489243
822.009	0.0228165	0.0382056	-0.00220813	0.00509004
822.491	0.0227817	0.0391981	-0.0022406	0.00535685
822.973	0.0227406	0.0403477	-0.00223958	0.00567937
823.455	0.0226941	0.0416372	-0.0022138	0.00603781
823.938	0.0226418	0.0430281	-0.00217539	0.00640967
824.42	0.0225823	0.044462	-0.00213573	0.0067746
824.902	0.0225136	0.0458577	-0.00210295	0.00711354
825.384	0.0224343	0.0471196	-0.00208136	0.00741037
825.866	0.0223443	0.0481578	-0.00207061	0.0076523
826.348	0.0222443	0.0488906	-0.0020678	0.00782864
826.83	0.0221362	0.0492611	-0.00206843	0.00793145
827.312	0.0220217	0.0492443	-0.00206869	0.00795601
827.794	0.0219022	0.0488457	-0.00206596	0.00790084
828.277	0.0217793	0.0480992	-0.00206131	0.00776771
828.759	0.0216548	0.0470588	-0.00205801	0.00756227
829.241	0.0215307	0.0457965	-0.00206259	0.00729461
829.723	0.02141	0.0443886	-0.00208126	0.0069789
830.205	0.0212949	0.0429081	-0.00211707	0.00663405
830.687	0.0211876	0.0414253	-0.00216754	0.00628429
831.169	0.0210889	0.0399969	-0.00222332	0.00595597
831.651	0.0209985	0.0386659	-0.00226934	0.00567501
832.134	0.0209154	0.0374639	-0.00228747	0.00546431
832.616	0.0208384	0.0364065	-0.00226394	0.00533548
833.098	0.020767	0.0354976	-0.00219244	0.00528862
833.58	0.0207004	0.0347297	-0.00207697	0.00531009
834.062	0.0206384	0.0340881	-0.00193056	0.00537801
834.544	0.0205803	0.0335534	-0.00177101	0.00546699
835.026	0.0205244	0.0331038	-0.00161589	0.00555494
835.508	0.0204687	0.0327197	-0.00147676	0.00562979
835.99	0.0204114	0.032384	-0.00135776	0.00568991
836.473	0.0203503	0.0320833	-0.00125651	0.00574306
836.955	0.0202851	0.0318087	-0.00116661	0.00580031
837.437	0.0202164	0.0315547	-0.0010822	0.00587137
837.919	0.0201457	0.0313179	-0.000999596	0.00595974
838.401	0.0200739	0.0310961	-0.000919523	0.00606147
838.883	0.020003	0.0308865	-0.000845486	0.00616554
839.365	0.0199339	0.030686	-0.000781359	0.00625894
839.847	0.0198682	0.0304918	-0.000730289	0.00633075
840.33	0.019808	0.0303024	-0.000694067	0.00637382
840.812	0.0197557	0.0301189	-0.000672266	0.00638744
841.294	0.0197139	0.0299458	-0.000664293	0.00637506
841.776	0.0196842	0.0297889	-0.000669355	0.00634222
842.258	0.019667	0.0296538	-0.000687054	0.0062939
842.74	0.0196604	0.0295431	-0.000716826	0.00623249
843.222	0.0196613	0.0294546	-0.000757479	0.00615865
843.704	0.0196666	0.0293828	-0.00080719	0.00607128
844.187	0.0196739	0.0293196	-0.000864335	0.00596981
844.669	0.0196826	0.029258	-0.00092759	0.00585481
845.151	0.0196937	0.0291951	-0.000996654	0.00572872
845.633	0.0197099	0.0291325	-0.00107248	0.00559518
846.115	0.019733	0.0290748	-0.00115659	0.00545749
846.597	0.0197646	0.0290275	-0.00124957	0.00531851
847.079	0.0198041	0.0289932	-0.00135079	0.00517882
847.561	0.0198497	0.0289705	-0.00145783	0.00503785
848.043	0.019899	0.0289546	-0.00156643	0.00489504
848.525	0.0199495	0.0289383	-0.00167177	0.0047497
849.008	0.0199996	0.0289164	-0.0017686	0.00460307
849.49	0.020048	0.0288865	-0.00185228	0.00445762
849.972	0.0200935	0.0288493	-0.00191938	0.00431661
850.454	0.0201345	0.0288075	-0.00196804	0.00418321
850.936	0.0201695	0.028763	-0.00199871	0.00405877
851.418	0.0201971	0.0287159	-0.00201504	0.00394257
851.9	0.0202166	0.0286644	-0.00202411	0.00383181
852.382	0.0202295	0.0286059	-0.00203483	0.00372311
852.865	0.0202378	0.0285391	-0.00205633	0.00361405
853.347	0.0202441	0.0284653	-0.00209511	0.00350414
853.829	0.0202502	0.0283875	-0.00215208	0.0033962
854.311	0.0202561	0.0283088	-0.00222263	0.00329452
854.793	0.0202594	0.0282312	-0.00229673	0.00320422
855.275	0.0202568	0.0281531	-0.00236363	0.00312786
855.757	0.0202448	0.0280706	-0.00241412	0.00306485
856.239	0.0202216	0.0279793	-0.00244427	0.0030116
856.721	0.0201884	0.0278766	-0.00245662	0.00296249
857.204	0.0201496	0.0277641	-0.00245774	0.00291218
857.686	0.0201114	0.0276464	-0.0024559	0.00285765
858.168	0.0200804	0.0275305	-0.00245682	0.00279992
858.65	0.0200626	0.027423	-0.00246288	0.00274293
859.132	0.0200612	0.0273278	-0.0024724	0.00269158
859.614	0.0200763	0.0272453	-0.00248235	0.00265021
860.096	0.0201061	0.0271738	-0.00248957	0.00262061
860.578	0.0201468	0.0271111	-0.00249355	0.00260167
861.061	0.020194	0.0270564	-0.00249569	0.00259034
861.543	0.0202435	0.0270108	-0.0024982	0.00258344
862.025	0.0202919	0.0269765	-0.00250258	0.00257878
862.507	0.0203375	0.0269546	-0.00250818	0.00257604
862.989	0.0203798	0.0269443	-0.00251309	0.00257588
863.471	0.0204202	0.0269416	-0.00251586	0.00257868
863.953	0.0204613	0.0269411	-0.00251615	0.00258378
864.435	0.0205074	0.0269373	-0.00251668	0.00258891
864.918	0.0205616	0.0269275	-0.00252136	0.00259101
865.4	0.0206271	0.0269116	-0.00253371	0.00258754
865.882	0.0207046	0.0268923	-0.00255436	0.00257824
866.364	0.0207934	0.0268737	-0.00257989	0.00256511
866.846	0.0208903	0.0268592	-0.00260331	0.00255218
867.328	0.0209917	0.0268516	-0.00261688	0.00254451
867.81	0.0210935	0.0268524	-0.00261494	0.00254535
868.292	0.0211933	0.0268631	-0.00259537	0.00255624
868.774	0.0212897	0.0268848	-0.00256178	0.00257558
869.256	0.0213831	0.0269187	-0.0025207	0.00259964
869.739	0.0214753	0.0269655	-0.00248044	0.00262354
870.221	0.0215686	0.0270239	-0.00244733	0.00264268
870.703	0.0216658	0.0270904	-0.00242545	0.00265324
871.185	0.0217698	0.0271593	-0.00241567	0.00265331
871.667	0.0218832	0.0272256	-0.00241675	0.00264244
872.149	0.0220084	0.0272859	-0.00242598	0.00262224
872.631	0.0221476	0.02734	-0.00243969	0.00259638
873.114	0.0223021	0.0273906	-0.00245402	0.00256941
873.596	0.022472	0.0274428	-0.0024637	0.00254745
874.078	0.0226559	0.0275007	-0.00246305	0.00253605
874.56	0.0228517	0.0275673	-0.00244687	0.00253915
875.042	0.0230564	0.0276428	-0.00241237	0.00255794
875.524	0.0232668	0.0277257	-0.00236044	0.00258998
876.006	0.0234807	0.0278145	-0.0022962	0.00263004
876.488	0.0236965	0.0279078	-0.0022288	0.00267041
876.97	0.023914	0.0280055	-0.00216844	0.00270369
877.452	0.024134	0.0281088	-0.00212346	0.00272449
877.935	0.0243576	0.0282187	-0.00209867	0.00273039
878.417	0.0245867	0.0283358	-0.00209389	0.00272262
878.899	0.0248229	0.0284609	-0.00210464	0.00270552
879.381	0.0250678	0.0285952	-0.00212373	0.00268495
879.863	0.0253223	0.0287405	-0.00214407	0.00266701
880.345	0.0255863	0.0288996	-0.00215993	0.00265658
880.827	0.0258588	0.029075	-0.00216771	0.00265678
881.309	0.0261376	0.0292674	-0.00216613	0.00266818
881.792	0.0264197	0.0294741	-0.00215525	0.00268958
882.274	0.0267019	0.0296895	-0.00213645	0.00271796
882.756	0.0269809	0.0299067	-0.00211077	0.00274997
883.238	0.0272549	0.0301184	-0.0020804	0.00278225
883.72	0.0275225	0.0303206	-0.0020468	0.00281263
884.202	0.0277828	0.0305124	-0.00201207	0.00284037
884.684	0.028035	0.0306957	-0.00197793	0.00286555
885.166	0.0282778	0.0308726	-0.00194613	0.00288877
885.649	0.0285088	0.0310438	-0.001918	0.00291035
886.131	0.0287256	0.0312068	-0.00189547	0.0029294
886.613	0.0289253	0.0313569	-0.00187989	0.00294414
887.095	0.0291054	0.0314895	-0.0018729	0.00295285
887.577	0.0292638	0.0316008	-0.00187521	0.00295435
888.059	0.0293988	0.0316904	-0.00188544	0.00294985
888.541	0.0295087	0.0317602	-0.00190058	0.00294247
889.023	0.0295919	0.0318135	-0.001915	0.00293767
889.505	0.0296471	0.0318525	-0.00192255	0.00294074
889.987	0.029674	0.0318771	-0.00191826	0.00295592
890.47	0.0296738	0.0318853	-0.00189966	0.00298521
890.952	0.0296488	0.0318746	-0.00186798	0.00302768
891.434	0.0296026	0.0318436	-0.00182734	0.00308117
891.916	0.0295386	0.0317933	-0.00178299	0.00314318
892.398	0.0294599	0.0317275	-0.00173837	0.00321297
892.88	0.0293684	0.031651	-0.00169464	0.00329122
893.362	0.0292649	0.031569	-0.0016488	0.0033808
893.845	0.0291498	0.0314845	-0.00159651	0.00348433
894.327	0.0290236	0.031399	-0.00153286	0.00360372
894.809	0.0288875	0.0313127	-0.00145529	0.00373896
895.291	0.028743	0.0312259	-0.00136387	0.00388891
895.773	0.0285917	0.0311386	-0.0012614	0.00405195
896.255	0.0284346	0.0310516	-0.00115124	0.00422774
896.737	0.0282717	0.0309649	-0.00103556	0.00441786
897.219	0.0281019	0.0308773	-0.000914265	0.00462587
897.701	0.0279243	0.0307866	-0.000784865	0.0048564
898.183	0.0277381	0.03069	-0.000643913	0.00511344
898.666	0.0275435	0.0305855	-0.000488055	0.00539979
899.148	0.0273415	0.0304732	-0.000315421	0.0057159
899.63	0.0271338	0.0303551	-0.000126355	0.00606063
900.112	0.0269222	0.0302345	7.8104e-05	0.00643166
900.594	0.0267077	0.0301135	0.000296253	0.00682636
901.076	0.02649	0.0299924	0.000527018	0.00724191
901.558	0.0262679	0.0298677	0.000769225	0.00767452
902.04	0.0260388	0.0297344	0.00102146	0.00811917
902.523	0.0257997	0.0295865	0.00128063	0.00856868
903.005	0.0255468	0.0294206	0.00154124	0.0090133
903.487	0.0252771	0.0292363	0.00179623	0.00944199
903.969	0.0249882	0.0290365	0.00203718	0.00984249
904.451	0.0246796	0.0288265	0.00225488	0.0102023
904.933	0.0243523	0.0286109	0.00244177	0.0105107
905.415	0.0240102	0.028394	0.00259188	0.0107586
905.897	0.023659	0.0281775	0.00270045	0.0109389
906.38	0.0233052	0.0279625	0.00276524	0.0110476
906.862	0.0229556	0.0277498	0.00278515	0.0110827
907.344	0.022616	0.0275409	0.00276064	0.0110449
907.826	0.02229	0.0273378	0.00269362	0.0109373
908.308	0.0219793	0.0271433	0.00258804	0.0107656
908.79	0.0216841	0.0269595	0.0024495	0.0105383
909.272	0.0214033	0.0267869	0.00228443	0.0102647
909.754	0.0211359	0.0266254	0.00209983	0.0099553
910.236	0.0208806	0.0264742	0.00190214	0.00962048
910.719	0.0206366	0.0263328	0.00169556	0.00926814
911.201	0.0204032	0.0262015	0.00148392	0.00890465
911.683	0.0201799	0.0260809	0.0012693	0.00853455
912.165	0.0199662	0.0259709	0.00105335	0.00816087
912.647	0.0197615	0.0258706	0.000837441	0.00778644
913.129	0.0195656	0.0257781	0.000622737	0.00741485
913.611	0.0193781	0.0256911	0.000409929	0.00705039
914.093	0.0191989	0.0256083	0.00019938	0.00669791
914.576	0.0190279	0.0255299	-9.11177e-06	0.00636209
915.058	0.0188649	0.0254584	-0.000214788	0.00604675
915.54	0.0187101	0.0253969	-0.000415997	0.00575427
916.022	0.0185638	0.0253477	-0.000609768	0.00548602
916.504	0.0184264	0.0253113	-0.000791712	0.0052415
916.986	0.0182988	0.0252849	-0.000957247	0.00501951
917.468	0.018182	0.0252652	-0.00110299	0.00481858
917.95	0.0180763	0.0252481	-0.00122806	0.00463649
918.433	0.0179814	0.0252318	-0.00133335	0.00447128
918.915	0.0178959	0.0252166	-0.00142171	0.0043213
919.397	0.0178173	0.0252045	-0.0014971	0.00418481
919.879	0.0177422	0.0251978	-0.00156277	0.00406051
920.361	0.0176676	0.0251971	-0.0016211	0.00394745
920.843	0.0175905	0.0252014	-0.00167382	0.00384531
921.325	0.0175092	0.0252081	-0.00172184	0.00375423
921.807	0.0174234	0.0252149	-0.00176576	0.00367483
922.289	0.0173337	0.0252215	-0.00180648	0.00360797
922.771	0.0172423	0.0252299	-0.0018442	0.00355481
923.254	0.0171512	0.0252439	-0.00187834	0.00351556
923.736	0.017063	0.0252672	-0.00190764	0.00348984
924.218	0.0169795	0.0253018	-0.00193007	0.00347622
924.7	0.0169025	0.025347	-0.00194412	0.00347264
925.182	0.0168325	0.0254002	-0.00194943	0.00347702
925.664	0.0167697	0.0254584	-0.00194696	0.00348824
926.146	0.0167134	0.0255196	-0.00193878	0.00350618
926.628	0.0166625	0.0255842	-0.00192727	0.00353163
927.111	0.0166156	0.0256539	-0.0019144	0.0035654
927.593	0.0165709	0.0257305	-0.0019014	0.0036072
928.075	0.0165266	0.0258142	-0.00188867	0.00365458
928.557	0.0164813	0.0259026	-0.00187729	0.00370326
929.039	0.0164342	0.0259918	-0.00186858	0.00374755
929.521	0.016385	0.0260777	-0.00186459	0.00378271
930.003	0.0163341	0.0261583	-0.00186703	0.0038064
930.485	0.0162824	0.0262348	-0.00187603	0.00382064
930.967	0.0162317	0.026311	-0.0018894	0.00383084
931.45	0.0161833	0.0263916	-0.00190259	0.00384431
931.932	0.0161387	0.0264804	-0.00190995	0.00386865
932.414	0.0160988	0.0265788	-0.00190681	0.00390883
932.896	0.0160634	0.0266861	-0.00189131	0.00396604
933.378	0.0160316	0.0267998	-0.00186505	0.00403811
933.86	0.0160019	0.0269179	-0.00183265	0.00412049
934.342	0.0159719	0.0270392	-0.00179886	0.00420873
934.824	0.0159398	0.0271641	-0.00176685	0.00429968
935.307	0.0159037	0.0272929	-0.00173653	0.00439235
935.789	0.0158632	0.0274253	-0.00170478	0.00448705
936.271	0.0158184	0.0275591	-0.00166712	0.00458428
936.753	0.0157703	0.0276917	-0.00162047	0.00468375
937.235	0.0157206	0.0278207	-0.00156488	0.00478377
937.717	0.0156711	0.0279455	-0.00150433	0.0048815
938.199	0.0156239	0.028068	-0.00144443	0.00497477
938.681	0.0155801	0.028192	-0.00139099	0.00506228
939.163	0.0155411	0.0283219	-0.00134749	0.00514459
939.646	0.0155069	0.0284603	-0.00131416	0.00522346
940.128	0.0154769	0.0286079	-0.00128836	0.0053007
940.61	0.0154495	0.0287627	-0.00126646	0.00537751
941.092	0.0154229	0.0289216	-0.00124617	0.00545317
941.574	0.0153942	0.0290813	-0.00122734	0.00552575
942.056	0.015361	0.0292394	-0.00121148	0.00559257
942.538	0.015322	0.0293945	-0.00120081	0.00565124
943.02	0.0152767	0.0295457	-0.00119598	0.00570086
943.503	0.0152262	0.0296918	-0.00119578	0.00574155
943.985	0.015172	0.0298316	-0.00119707	0.00577445
944.467	0.0151167	0.0299638	-0.00119671	0.00580051
944.949	0.0150623	0.0300886	-0.00119321	0.00582019
945.431	0.0150101	0.030207	-0.00118769	0.00583322
945.913	0.0149602	0.0303207	-0.00118422	0.00583829
946.395	0.0149118	0.0304315	-0.00118726	0.00583483
946.877	0.014864	0.0305386	-0.00120054	0.0058225
947.36	0.0148154	0.0306383	-0.0012247	0.00580262
947.842	0.0147652	0.0307251	-0.00125717	0.005777
948.324	0.0147129	0.0307929	-0.00129345	0.00574813
948.806	0.0146587	0.0308372	-0.00132823	0.00571825
949.288	0.0146028	0.0308571	-0.00135809	0.00568907
949.77	0.0145457	0.0308547	-0.00138204	0.00566094
950.252	0.014488	0.0308342	-0.00140169	0.00563365
950.734	0.0144297	0.0307998	-0.00141986	0.00560643
951.216	0.0143716	0.0307529	-0.00143931	0.00557843
951.698	0.0143141	0.0306926	-0.00146104	0.0055492
952.181	0.0142582	0.0306162	-0.00148478	0.0055189
952.663	0.0142049	0.030521	-0.00150812	0.00548863
953.145	0.0141555	0.0304062	-0.00152817	0.00546061
953.627	0.0141106	0.0302735	-0.00154167	0.00543753
954.109	0.0140705	0.0301263	-0.00154563	0.00542324
954.591	0.0140352	0.0299685	-0.00153744	0.00542136
955.073	0.0140036	0.0298023	-0.00151509	0.00543471
955.555	0.0139743	0.029628	-0.00147712	0.00546548
956.038	0.0139456	0.0294442	-0.00142352	0.00551407
956.52	0.0139154	0.0292496	-0.00135545	0.00557988
957.002	0.0138824	0.0290439	-0.0012761	0.00566097
957.484	0.0138461	0.0288294	-0.00118944	0.00575555
957.966	0.0138069	0.0286092	-0.00109968	0.00586119
958.448	0.0137663	0.0283871	-0.00101051	0.005976
958.93	0.0137262	0.0281658	-0.000924284	0.00609789
959.412	0.0136888	0.0279464	-0.000841088	0.00622513
959.894	0.0136557	0.0277287	-0.000759695	0.00635556
960.377	0.0136275	0.027513	-0.000678353	0.00648688
960.859	0.0136038	0.0273003	-0.00059564	0.00661645
961.341	0.0135828	0.0270936	-0.00051109	0.00674128
961.823	0.0135627	0.0268963	-0.000426127	0.00685834
962.305	0.013541	0.0267116	-0.000343894	0.00696392
962.787	0.0135159	0.0265411	-0.000268833	0.00705366
963.269	0.0134865	0.0263839	-0.000205846	0.00712378
963.751	0.0134528	0.0262386	-0.000159412	0.00717056
964.234	0.0134155	0.0261039	-0.000133344	0.00719145
964.716	0.0133763	0.0259801	-0.000129667	0.00718562
965.198	0.0133372	0.0258698	-0.000148084	0.00715439
965.68	0.0133004	0.0257769	-0.000186869	0.00710047
966.162	0.0132677	0.0257044	-0.000242738	0.00702739
966.644	0.0132405	0.025654	-0.000311514	0.0069392
967.126	0.0132189	0.0256247	-0.000389151	0.00683902
967.608	0.0132032	0.0256143	-0.000472102	0.00672987
968.091	0.0131922	0.0256203	-0.000557586	0.00661403
968.573	0.0131848	0.025642	-0.000643218	0.00649448
969.055	0.01318	0.0256801	-0.000727081	0.006375
969.537	0.0131772	0.0257371	-0.000806429	0.00626056
970.019	0.0131764	0.0258144	-0.000878158	0.00615676
970.501	0.0131777	0.0259113	-0.000939096	0.00606906
970.983	0.0131809	0.026024	-0.000986207	0.00600203
971.465	0.0131858	0.0261475	-0.00101731	0.00595839
971.947	0.0131913	0.0262762	-0.00103179	0.00593908
972.43	0.0131958	0.0264064	-0.00102998	0.00594358
972.912	0.0131978	0.0265373	-0.00101348	0.00597028
973.394	0.0131957	0.0266701	-0.000984422	0.00601749
973.876	0.0131891	0.0268061	-0.000945312	0.00608287
974.358	0.0131781	0.0269459	-0.000898758	0.00616396
974.84	0.0131636	0.0270881	-0.00084757	0.0062578
975.322	0.0131469	0.02723	-0.000794655	0.00636104
975.804	0.0131295	0.0273696	-0.000742396	0.00647033
976.287	0.0131128	0.0275067	-0.000691785	0.00658328
976.769	0.0130982	0.0276438	-0.000642722	0.00669811
977.251	0.0130869	0.0277846	-0.000593952	0.00681438
977.733	0.01308	0.0279323	-0.000543257	0.00693176
978.215	0.0130787	0.0280881	-0.000489081	0.00704938
978.697	0.0130834	0.0282496	-0.000432383	0.0071645
979.179	0.0130937	0.0284118	-0.000376372	0.00727274
979.661	0.0131084	0.0285686	-0.000326546	0.00736831
980.143	0.0131254	0.0287153	-0.000289263	0.00744495
980.625	0.0131421	0.0288499	-0.000269959	0.00749774
981.108	0.0131559	0.028973	-0.000271515	0.007524
981.59	0.0131655	0.0290866	-0.000293336	0.00752383
982.072	0.0131704	0.0291938	-0.000331678	0.0074998
982.554	0.0131718	0.0292966	-0.000381239	0.00745594
983.036	0.0131713	0.0293963	-0.000436752	0.00739669
983.518	0.0131716	0.0294943	-0.00049388	0.00732632
984	0.0131754	0.0295922	-0.000550438	0.00724842
984.482	0.0131845	0.0296921	-0.000605268	0.00716598
984.965	0.0132	0.0297959	-0.000657478	0.00708238
985.447	0.0132223	0.0299041	-0.000706108	0.00700102
985.929	0.0132508	0.0300148	-0.000749574	0.0069252
986.411	0.0132841	0.0301239	-0.000786221	0.0068579
986.893	0.0133215	0.0302265	-0.000814631	0.00680092
987.375	0.0133616	0.0303187	-0.000834738	0.00675461
987.857	0.0134035	0.0303986	-0.000847106	0.00671773
988.339	0.0134472	0.0304668	-0.000853026	0.00668808
988.822	0.0134921	0.0305254	-0.00085339	0.00666325
989.304	0.0135386	0.0305765	-0.00084876	0.00664088
989.786	0.0135862	0.0306201	-0.000838971	0.00661978
990.268	0.0136343	0.0306546	-0.000824156	0.00659936
990.75	0.0136819	0.0306767	-0.000805073	0.00657992
991.232	0.0137275	0.0306839	-0.000783178	0.00656232
991.714	0.0137701	0.0306751	-0.000760687	0.00654806
992.196	0.0138089	0.0306521	-0.000739022	0.00653895
992.678	0.0138442	0.030618	-0.000718579	0.00653666
993.16	0.0138771	0.0305763	-0.000697673	0.00654318
993.643	0.0139088	0.0305291	-0.000673556	0.00655977
994.125	0.013941	0.0304768	-0.000642854	0.00658722
994.607	0.0139744	0.0304179	-0.000603184	0.00662537
995.089	0.0140088	0.0303513	-0.000553648	0.00667388
995.571	0.0140433	0.0302767	-0.000494608	0.00673274
996.053	0.0140761	0.0301961	-0.000427417	0.0068027
996.535	0.0141051	0.0301123	-0.0003529	0.00688544
997.018	0.0141288	0.0300281	-0.00027072	0.00698371
997.5	0.0141464	0.029945	-0.000179516	0.00710023
997.982	0.0141574	0.0298628	-7.76592e-05	0.00723649
998.464	0.0141626	0.0297792	3.54217e-05	0.00739126
998.946	0.0141628	0.0296922	0.000157747	0.00756008
999.428	0.0141597	0.0296004	0.000285013	0.0077353
999.91	0.014155	0.0295042	0.000410261	0.00790665
1000.39	0.0141506	0.0294054	0.000525725	0.00806203
1000.87	0.0141487	0.0293063	0.000624429	0.00819082
1001.36	0.0141506	0.0292089	0.000701119	0.00828395
1001.84	0.0141572	0.0291142	0.000753193	0.00833603
1002.32	0.0141682	0.0290227	0.00078071	0.0083461
1002.8	0.0141821	0.0289349	0.000785822	0.00831725
1003.28	0.0141965	0.0288522	0.000772279	0.00825636
1003.77	0.0142092	0.0287767	0.000744596	0.00817204
1004.25	0.0142185	0.0287107	0.00070832	0.00807468
1004.73	0.0142239	0.0286549	0.000668994	0.00797447
1005.21	0.0142263	0.0286089	0.00063216	0.00787979
1005.7	0.0142277	0.0285698	0.000603027	0.00779851
1006.18	0.0142305	0.0285343	0.000585674	0.00773624
1006.66	0.0142364	0.0284996	0.000582589	0.00769671
1007.14	0.0142464	0.0284648	0.000594799	0.00768211
1007.62	0.0142601	0.0284312	0.00062204	0.00769301
1008.11	0.0142761	0.0284016	0.000662955	0.00772852
1008.59	0.0142928	0.0283789	0.000715522	0.00778579
1009.07	0.0143092	0.0283651	0.000777556	0.0078614
1009.55	0.0143246	0.0283604	0.00084677	0.00795075
1010.03	0.0143395	0.0283642	0.000921341	0.00804997
1010.52	0.0143545	0.0283755	0.000999743	0.00815651
1011	0.0143706	0.0283944	0.00108181	0.00826994
1011.48	0.0143887	0.0284214	0.00116829	0.00839197
1011.96	0.014409	0.0284573	0.00126052	0.00852566
1012.45	0.0144317	0.0285016	0.00136056	0.00867447
1012.93	0.014456	0.0285523	0.00146959	0.00884047
1013.41	0.014481	0.0286058	0.0015872	0.00902365
1013.89	0.0145053	0.0286578	0.00171133	0.00922157
1014.37	0.014527	0.0287054	0.00183822	0.00942993
1014.86	0.0145445	0.028748	0.00196398	0.00964419
1015.34	0.0145558	0.0287876	0.00208565	0.0098611
1015.82	0.0145595	0.0288277	0.0022022	0.0100792
1016.3	0.014555	0.0288713	0.00231507	0.0102997
1016.78	0.0145429	0.0289205	0.00242778	0.0105257
1017.27	0.0145238	0.0289756	0.00254438	0.0107619
1017.75	0.0144997	0.029036	0.00266878	0.0110132
1018.23	0.0144723	0.0291017	0.00280422	0.0112846
1018.71	0.0144432	0.0291744	0.00295282	0.0115808
1019.2	0.0144137	0.0292576	0.00311634	0.0119065
1019.68	0.0143845	0.0293555	0.00329739	0.012266
1020.16	0.0143561	0.0294715	0.0034989	0.0126635
1020.64	0.0143293	0.029607	0.00372428	0.0131025
1021.12	0.0143049	0.0297605	0.00397681	0.0135858
1021.61	0.0142834	0.0299293	0.00425815	0.0141152
1022.09	0.0142651	0.0301103	0.00456831	0.0146912
1022.57	0.0142503	0.0303015	0.00490523	0.0153125
1023.05	0.0142385	0.0305031	0.00526565	0.0159763
1023.53	0.0142294	0.0307165	0.00564496	0.0166765
1024.02	0.014223	0.0309434	0.00603744	0.0174027
1024.5	0.0142194	0.0311848	0.0064365	0.0181403
1024.98	0.0142194	0.0314407	0.00683289	0.0188684
1025.46	0.0142239	0.0317105	0.00721469	0.0195613
1025.94	0.0142336	0.0319941	0.00756756	0.0201917
1026.43	0.014249	0.032293	0.00787496	0.0207307
1026.91	0.0142698	0.0326101	0.00811989	0.0211517
1027.39	0.0142952	0.0329485	0.00828784	0.0214342
1027.87	0.0143238	0.0333113	0.00836663	0.0215638
1028.36	0.0143543	0.0336999	0.00834924	0.0215338
1028.84	0.0143858	0.0341147	0.00823343	0.0213445
1029.32	0.0144174	0.0345557	0.00802149	0.0210026
1029.8	0.014449	0.0350235	0.00771938	0.0205189
1030.28	0.0144806	0.03552	0.00733589	0.0199067
1030.77	0.0145119	0.0360482	0.00688265	0.0191831
1031.25	0.0145423	0.0366107	0.00637352	0.0183675
1031.73	0.0145709	0.0372086	0.00582401	0.0174833
1032.21	0.0145962	0.037841	0.00525183	0.0165588
1032.69	0.0146166	0.0385057	0.00467387	0.0156243
1033.18	0.014631	0.0391998	0.0041051	0.0147106
1033.66	0.0146388	0.0399222	0.00355822	0.0138469
1034.14	0.0146403	0.040673	0.0030414	0.0130549
1034.62	0.0146368	0.0414537	0.00256051	0.01235
1035.11	0.0146304	0.0422654	0.00211978	0.0117404
1035.59	0.0146233	0.0431073	0.00172257	0.011228
1036.07	0.0146176	0.0439756	0.00137239	0.01081
1036.55	0.0146142	0.0448639	0.00107188	0.0104811
1037.03	0.0146131	0.045765	0.000822204	0.0102342
1037.52	0.0146125	0.0466706	0.000621609	0.0100605
1038	0.0146103	0.0475722	0.000465484	0.00995022
1038.48	0.0146041	0.0484606	0.000347516	0.009893
1038.96	0.0145922	0.0493228	0.000260048	0.0098774
1039.44	0.0145747	0.0501428	0.000196297	0.00989245
1039.93	0.0145527	0.0509025	0.00015135	0.00992852
1040.41	0.0145284	0.0515827	0.000121486	0.0099769
1040.89	0.014504	0.0521679	0.000104252	0.0100304
1041.37	0.0144813	0.0526489	9.73587e-05	0.0100834
1041.85	0.0144605	0.0530226	9.82867e-05	0.010131
1042.34	0.014441	0.0532918	0.000104318	0.0101692
1042.82	0.0144211	0.053462	0.000112969	0.0101949
1043.3	0.0143995	0.0535402	0.000122315	0.0102063
1043.78	0.0143754	0.0535325	0.000131363	0.0102036
1044.27	0.0143494	0.053445	0.000140213	0.0101889
1044.75	0.0143229	0.0532857	0.000148963	0.0101659
1045.23	0.0142974	0.0530636	0.00015768	0.0101385
1045.71	0.0142746	0.0527908	0.0001661	0.0101108
1046.19	0.0142553	0.0524802	0.000173823	0.010085
1046.68	0.0142395	0.0521442	0.000180949	0.0100621
1047.16	0.0142271	0.0517934	0.000188607	0.0100417
1047.64	0.0142179	0.0514364	0.000198717	0.0100234
1048.12	0.0142119	0.0510802	0.000213668	0.0100066
1048.6	0.0142098	0.0507307	0.000235117	0.00999168
1049.09	0.0142125	0.0503937	0.00026333	0.00997907
1049.57	0.0142203	0.0500742	0.000296684	0.00996914
1050.05	0.0142332	0.049776	0.000332329	0.00996134
1050.53	0.0142501	0.0495003	0.000366518	0.00995419
1051.02	0.0142693	0.0492464	0.00039653	0.00994608
1051.5	0.0142891	0.0490126	0.000421073	0.00993605
1051.98	0.0143074	0.0487989	0.000440906	0.00992489
1052.46	0.0143239	0.0486081	0.000458585	0.00991557
1052.94	0.0143384	0.0484475	0.000477492	0.00991306
1053.42	0.0143522	0.0483263	0.000500845	0.00992283
1053.91	0.0143667	0.0482535	0.000530966	0.00994927
1054.39	0.0143835	0.0482349	0.000568322	0.0099948
1054.87	0.0144039	0.0482704	0.000611953	0.0100587
1055.35	0.0144283	0.0483558	0.000660167	0.0101381
1055.84	0.0144567	0.0484828	0.000710179	0.010229
1056.32	0.0144878	0.0486447	0.000760296	0.0103281
1056.8	0.0145201	0.0488377	0.000809423	0.0104335
1057.28	0.0145514	0.049062	0.000858124	0.0105456
1057.76	0.0145803	0.0493213	0.000908657	0.0106662
1058.25	0.0146052	0.0496193	0.000963944	0.0107981
1058.73	0.0146255	0.0499572	0.00102738	0.0109433
1059.21	0.0146415	0.0503333	0.00110151	0.0111028
1059.69	0.014654	0.0507427	0.00118686	0.0112758
1060.17	0.0146647	0.0511796	0.00128212	0.0114608
1060.66	0.0146748	0.0516392	0.00138422	0.0116558
1061.14	0.0146855	0.0521189	0.00148938	0.0118586
1061.62	0.0146972	0.0526177	0.00159388	0.0120675
1062.1	0.0147094	0.0531345	0.00169549	0.0122809
1062.59	0.0147212	0.0536675	0.00179347	0.0124969
1063.07	0.0147312	0.0542138	0.0018883	0.0127136
1063.55	0.014738	0.0547703	0.00198076	0.0129293
1064.03	0.0147408	0.0553354	0.00207127	0.0131423
1064.51	0.0147389	0.0559096	0.00215944	0.013351
1065	0.0147324	0.0564952	0.00224359	0.0135543
1065.48	0.0147216	0.0570937	0.00232183	0.0137505
1065.96	0.0147067	0.057705	0.00239273	0.013938
1066.44	0.0146877	0.0583246	0.00245563	0.0141147
1066.92	0.0146643	0.0589453	0.00251119	0.014278
1067.41	0.0146358	0.0595598	0.00256048	0.0144263
1067.89	0.0146018	0.0601631	0.00260448	0.0145585
1068.37	0.0145619	0.0607541	0.00264341	0.014674
1068.85	0.0145162	0.0613358	0.00267655	0.0147735
1069.34	0.0144657	0.0619124	0.00270212	0.014857
1069.82	0.0144123	0.0624869	0.00271766	0.0149242
1070.3	0.0143577	0.0630585	0.00272126	0.0149739
1070.78	0.0143039	0.0636236	0.00271149	0.0150045
1071.26	0.0142525	0.0641766	0.00268798	0.0150144
1071.75	0.0142041	0.0647145	0.00265134	0.0150032
1072.23	0.0141584	0.0652371	0.00260298	0.0149717
1072.71	0.0141147	0.0657478	0.00254505	0.0149225
1073.19	0.0140715	0.0662504	0.00247963	0.0148586
1073.67	0.0140283	0.0667481	0.00240915	0.0147839
1074.16	0.0139846	0.06724	0.00233576	0.0147014
1074.64	0.0139405	0.0677228	0.00226094	0.0146134
1075.12	0.0138971	0.0681913	0.00218501	0.0145212
1075.6	0.0138555	0.0686424	0.00210786	0.0144257
1076.09	0.0138167	0.0690761	0.00202869	0.0143273
1076.57	0.0137813	0.0694958	0.00194681	0.0142268
1077.05	0.0137499	0.0699055	0.00186274	0.0141254
1077.53	0.0137223	0.0703078	0.0017784	0.0140244
1078.01	0.0136984	0.0707022	0.00169676	0.0139253
1078.49	0.0136783	0.0710859	0.00162102	0.0138292
1078.98	0.0136616	0.0714555	0.00155338	0.0137365
1079.46	0.0136481	0.0718088	0.00149376	0.0136464
1079.94	0.0136375	0.072147	0.00144	0.0135572
1080.42	0.0136292	0.0724726	0.00138741	0.0134658
1080.91	0.0136229	0.0727886	0.00133084	0.0133692
1081.39	0.013618	0.0730954	0.00126604	0.0132644
1081.87	0.0136145	0.0733905	0.00119045	0.0131498
1082.35	0.0136123	0.0736701	0.0011041	0.0130255
1082.83	0.0136119	0.0739308	0.00100921	0.0128936
1083.32	0.0136135	0.0741725	0.000909221	0.0127574
1083.8	0.013618	0.0743997	0.000808427	0.0126216
1084.28	0.0136259	0.0746182	0.000710046	0.0124899
1084.76	0.0136377	0.0748339	0.000617129	0.0123658
1085.24	0.0136536	0.0750494	0.000532127	0.0122517
1085.73	0.0136735	0.0752634	0.000456661	0.0121487
1086.21	0.0136965	0.0754713	0.000391755	0.0120573
1086.69	0.0137211	0.0756693	0.000337436	0.0119775
1087.17	0.0137455	0.075856	0.000292672	0.0119086
1087.65	0.0137681	0.0760341	0.000255373	0.0118494
1088.14	0.0137873	0.0762084	0.000222751	0.0117976
1088.62	0.0138026	0.0763826	0.000192286	0.0117506
1089.1	0.0138146	0.0765571	0.000162023	0.0117051
1089.58	0.0138247	0.0767281	0.000130733	0.0116581
1090.07	0.0138346	0.0768895	9.84524e-05	0.0116085
1090.55	0.0138458	0.077036	6.52458e-05	0.0115562
1091.03	0.0138589	0.0771662	3.12134e-05	0.0115031
1091.51	0.0138736	0.0772834	-3.94293e-06	0.0114519
1091.99	0.0138884	0.077394	-4.0521e-05	0.0114048
1092.48	0.0139018	0.0775033	-7.84875e-05	0.011363
1092.96	0.0139122	0.0776131	-0.000116881	0.0113258
1093.44	0.0139189	0.0777206	-0.000153682	0.0112913
1093.92	0.013922	0.07782	-0.000186273	0.0112569
1094.4	0.0139226	0.077906	-0.000212172	0.0112209
1094.89	0.0139222	0.077977	-0.000229823	0.0111833
1095.37	0.0139224	0.0780362	-0.000239063	0.0111452
1095.85	0.0139244	0.0780896	-0.000241347	0.0111092
1096.33	0.0139293	0.0781421	-0.000238698	0.0110777
1096.82	0.0139381	0.0781944	-0.000233598	0.0110516
1097.3	0.0139509	0.0782414	-0.000227836	0.0110304
1097.78	0.0139679	0.0782744	-0.000222935	0.0110118
1098.26	0.0139892	0.0782852	-0.000219458	0.0109928
1098.74	0.0140138	0.0782687	-0.000218696	0.0109703
1099.23	0.014041	0.0782258	-0.000221312	0.0109423
1099.71	0.0140691	0.0781613	-0.000228399	0.0109081
1100.19	0.0140966	0.0780809	-0.00024042	0.0108682
1100.67	0.014122	0.077988	-0.000256912	0.0108244
1101.15	0.0141449	0.0778815	-0.000276184	0.0107788
1101.64	0.0141648	0.0777571	-0.000295521	0.0107335
1102.12	0.0141825	0.0776111	-0.000311878	0.0106912
1102.6	0.0141984	0.077442	-0.000323003	0.0106532
1103.08	0.0142133	0.0772534	-0.000327638	0.0106211
1103.57	0.0142277	0.0770508	-0.000326248	0.0105952
1104.05	0.014242	0.0768405	-0.000320288	0.0105748
1104.53	0.0142564	0.0766252	-0.000312275	0.0105581
1105.01	0.0142711	0.0764034	-0.000304163	0.010543
1105.49	0.0142858	0.0761701	-0.000297376	0.0105269
1105.98	0.0143003	0.0759203	-0.000292508	0.0105083
1106.46	0.0143144	0.0756514	-0.000289296	0.0104864
1106.94	0.0143269	0.0753651	-0.000286912	0.0104619
1107.42	0.0143371	0.0750661	-0.000284495	0.0104358
1107.9	0.0143446	0.0747585	-0.000281151	0.0104088
1108.39	0.0143493	0.0744446	-0.000276316	0.0103811
1108.87	0.0143517	0.0741227	-0.000269859	0.0103519
1109.35	0.0143528	0.073789	-0.000261779	0.0103195
1109.83	0.0143538	0.0734396	-0.000252772	0.0102823
1110.32	0.0143557	0.0730734	-0.000243401	0.010239
1110.8	0.0143585	0.0726926	-0.000234459	0.0101893
1111.28	0.014362	0.0723019	-0.000227008	0.0101333
1111.76	0.014365	0.0719047	-0.000222008	0.0100715
1112.24	0.0143666	0.0715014	-0.000220683	0.0100037
1112.72	0.014366	0.0710884	-0.000224359	0.009929
1113.21	0.0143627	0.0706598	-0.000235022	0.00984575
1113.69	0.0143567	0.0702105	-0.000254163	0.00975218
1114.17	0.0143479	0.0697392	-0.000283005	0.00964714
1114.65	0.0143366	0.0692491	-0.00032191	0.00953055
1115.14	0.0143222	0.068747	-0.000369453	0.00940389
1115.62	0.0143051	0.0682403	-0.000422651	0.00926997
1116.1	0.0142849	0.0677334	-0.000477696	0.00913206
1116.58	0.0142627	0.067227	-0.000530582	0.00899337
1117.07	0.0142394	0.0667183	-0.000578102	0.0088569
1117.55	0.0142167	0.0662043	-0.000619066	0.00872409
1118.03	0.0141964	0.0656841	-0.000654004	0.00859625
1118.51	0.0141798	0.0651609	-0.000684573	0.00847366
1118.99	0.0141674	0.0646411	-0.000712427	0.00835694
1119.47	0.0141589	0.0641322	-0.000738526	0.00824633
1119.96	0.0141532	0.0636397	-0.000762672	0.00814227
1120.44	0.0141492	0.063166	-0.000783675	0.00804535
1120.92	0.0141448	0.0627098	-0.000800443	0.00795541
1121.4	0.0141386	0.0622686	-0.000812052	0.00787203
1121.89	0.0141296	0.06184	-0.00082022	0.0077943
1122.37	0.0141168	0.0614236	-0.000827264	0.00772059
1122.85	0.0141003	0.0610202	-0.000835763	0.0076495
1123.33	0.0140807	0.060631	-0.000847933	0.00757953
1123.81	0.0140591	0.0602552	-0.000864567	0.00751004
1124.3	0.0140371	0.0598905	-0.000884507	0.00744084
1124.78	0.0140159	0.0595332	-0.0009059	0.00737309
1125.26	0.0139966	0.0591806	-0.000926565	0.00730829
1125.74	0.013979	0.0588327	-0.000945213	0.00724815
1126.22	0.0139626	0.0584925	-0.00096128	0.00719431
1126.71	0.0139458	0.058165	-0.000975	0.00714779
1127.19	0.0139274	0.0578545	-0.000986571	0.00710862
1127.67	0.0139067	0.0575623	-0.000995828	0.00707605
1128.15	0.0138838	0.0572852	-0.00100244	0.0070481
1128.63	0.0138596	0.0570178	-0.00100545	0.00702315
1129.12	0.0138351	0.0567535	-0.00100502	0.00699944
1129.6	0.0138113	0.0564884	-0.00100191	0.00697601
1130.08	0.0137881	0.0562218	-0.000997745	0.0069523
1130.56	0.0137647	0.0559562	-0.000994009	0.00692894
1131.05	0.0137398	0.055695	-0.000991695	0.00690658
1131.53	0.0137125	0.0554396	-0.000990208	0.00688645
1132.01	0.0136819	0.0551879	-0.000987861	0.00686901
1132.49	0.0136485	0.054935	-0.000982307	0.00685498
1132.97	0.0136132	0.0546753	-0.000971694	0.00684387
1133.46	0.0135773	0.0544042	-0.000955792	0.00683515
1133.94	0.0135417	0.0541205	-0.00093579	0.00682744
1134.42	0.0135071	0.0538258	-0.000914265	0.00681909
1134.9	0.0134733	0.0535233	-0.000893963	0.00680873
1135.38	0.0134403	0.0532154	-0.000876703	0.00679496
1135.87	0.0134083	0.0529018	-0.000862847	0.00677749
1136.35	0.013378	0.0525805	-0.000851439	0.00675713
1136.83	0.0133495	0.0522487	-0.000841055	0.00673529
1137.31	0.0133231	0.0519046	-0.000830241	0.00671456
1137.8	0.013298	0.0515488	-0.000818401	0.0066972
1138.28	0.0132729	0.0511834	-0.000805999	0.00668475
1138.76	0.0132458	0.0508117	-0.000793365	0.00667765
1139.24	0.0132154	0.0504351	-0.000781062	0.00667509
1139.72	0.0131805	0.050053	-0.000768791	0.00667509
1140.21	0.0131417	0.0496625	-0.000755528	0.0066758
1140.69	0.0131006	0.0492606	-0.00073965	0.00667594
1141.17	0.0130594	0.0488452	-0.000720134	0.00667503
1141.65	0.0130199	0.048417	-0.000696151	0.00667392
1142.13	0.0129837	0.0479786	-0.00066823	0.00667385
1142.62	0.0129511	0.0475332	-0.00063637	0.00667651
1143.1	0.0129219	0.0470832	-0.000601066	0.00668293
1143.58	0.0128953	0.0466293	-0.000561888	0.00669454
1144.06	0.0128709	0.0461707	-0.000518073	0.00671231
1144.55	0.0128482	0.0457065	-0.000468296	0.00673782
1145.03	0.0128275	0.0452374	-0.000411595	0.00677336
1145.51	0.0128083	0.0447661	-0.000347238	0.00682132
1145.99	0.0127903	0.0442968	-0.000274925	0.00688419
1146.47	0.0127729	0.0438337	-0.000194619	0.00696436
1146.96	0.0127552	0.0433781	-0.000106082	0.00706329
1147.44	0.0127366	0.0429292	-8.48223e-06	0.00718242
1147.92	0.0127175	0.0424838	9.98112e-05	0.00732342
1148.4	0.0126982	0.0420386	0.000220298	0.00748817
1148.88	0.01268	0.0415922	0.000354613	0.00767877
1149.37	0.0126637	0.0411464	0.000503565	0.00789733
1149.85	0.0126504	0.0407053	0.000666373	0.00814335
1150.33	0.01264	0.0402743	0.000840529	0.00841281
1150.81	0.0126329	0.0398564	0.00102163	0.00869735
1151.3	0.0126289	0.0394521	0.00120337	0.00898373
1151.78	0.0126281	0.0390587	0.00137754	0.00925517
1152.26	0.0126312	0.0386722	0.00153566	0.00949444
1152.74	0.0126389	0.03829	0.00166935	0.00968559
1153.22	0.0126518	0.037912	0.00177078	0.00981572
1153.7	0.0126705	0.0375404	0.00183442	0.00987673
1154.19	0.0126941	0.0371795	0.00185732	0.00986507
1154.67	0.0127217	0.0368326	0.00183905	0.00978145
1155.15	0.012752	0.0365006	0.00178149	0.00962996
1155.63	0.0127835	0.0361822	0.00168934	0.00941862
1156.12	0.0128155	0.0358744	0.00156838	0.00915798
1156.6	0.0128474	0.0355751	0.00142524	0.00886086
1157.08	0.0128794	0.0352835	0.00126714	0.00854184
1157.56	0.0129119	0.0350014	0.00110161	0.0082156
1158.04	0.0129452	0.034731	0.000935619	0.0078948
1158.53	0.0129792	0.0344742	0.000775863	0.00759035
1159.01	0.0130139	0.0342307	0.000627415	0.00730893
1159.49	0.0130488	0.0339986	0.000493912	0.00705443
1159.97	0.0130836	0.0337749	0.000376632	0.00682754
1160.45	0.013118	0.0335579	0.000274867	0.00662735
1160.94	0.0131512	0.0333482	0.00018685	0.00645214
1161.42	0.0131828	0.0331485	0.000110417	0.00630043
1161.9	0.0132114	0.0329619	4.41699e-05	0.00617088
1162.38	0.0132359	0.0327904	-1.20606e-05	0.00606241
1162.87	0.0132556	0.0326329	-5.78813e-05	0.00597371
1163.35	0.0132692	0.0324863	-9.26991e-05	0.00590294
1163.83	0.0132767	0.0323457	-0.000116616	0.00584755
1164.31	0.0132781	0.0322083	-0.000131257	0.00580474
1164.79	0.0132741	0.0320731	-0.000139141	0.00577203
1165.28	0.013265	0.0319426	-0.000143215	0.00574695
1165.76	0.0132513	0.0318201	-0.000145865	0.00572785
1166.24	0.0132333	0.0317085	-0.000148349	0.00571334
1166.72	0.0132108	0.0316076	-0.000150436	0.00570257
1167.2	0.0131843	0.0315151	-0.000151131	0.00569495
1167.69	0.0131536	0.0314271	-0.00014974	0.00569062
1168.17	0.0131194	0.0313406	-0.000145666	0.00568991
1168.65	0.0130824	0.0312546	-0.00013924	0.00569407
1169.13	0.0130437	0.0311711	-0.00013076	0.00570458
1169.62	0.013004	0.0310935	-0.000120194	0.00572328
1170.1	0.0129642	0.0310243	-0.000106016	0.00575222
1170.58	0.012925	0.0309646	-8.62393e-05	0.00579231
1171.06	0.0128866	0.030913	-5.79807e-05	0.00584453
1171.54	0.0128494	0.0308677	-1.92505e-05	0.00590905
1172.03	0.0128132	0.0308281	3.0882e-05	0.00598644
1172.51	0.0127776	0.0307953	9.1559e-05	0.00607706
1172.99	0.0127424	0.0307729	0.00016126	0.00618227
1173.47	0.0127068	0.0307648	0.000238299	0.00630426
1173.95	0.0126708	0.0307736	0.000322017	0.00644622
1174.44	0.0126341	0.0307989	0.000413246	0.00661181
1174.92	0.0125974	0.0308378	0.000514047	0.00680429
1175.4	0.0125617	0.0308863	0.000626652	0.00702638
1175.88	0.0125279	0.0309419	0.000752264	0.00727824
1176.37	0.0124973	0.0310046	0.00089013	0.00755697
1176.85	0.0124706	0.0310772	0.00103651	0.00785495
1177.33	0.0124486	0.0311631	0.00118546	0.00816087
1177.81	0.0124312	0.0312647	0.00132945	0.00845974
1178.29	0.012418	0.0313821	0.00146028	0.00873528
1178.78	0.0124088	0.0315126	0.00157094	0.00897284
1179.26	0.012403	0.0316534	0.00165548	0.00916146
1179.74	0.0123998	0.0318028	0.00171106	0.00929573
1180.22	0.0123989	0.0319623	0.00173681	0.00937583
1180.7	0.0123996	0.0321359	0.00173451	0.00940606
1181.19	0.0124014	0.032329	0.00170803	0.00939357
1181.67	0.0124038	0.0325441	0.00166216	0.00934519
1182.15	0.0124064	0.0327811	0.00160286	0.00926797
1182.63	0.0124091	0.0330368	0.00153549	0.0091682
1183.12	0.0124121	0.0333063	0.00146411	0.00905126
1183.6	0.0124157	0.0335852	0.00139131	0.00892353
1184.08	0.0124206	0.0338726	0.00131825	0.00879171
1184.56	0.012427	0.0341698	0.001245	0.00866253
1185.04	0.0124354	0.0344791	0.00117134	0.00854276
1185.53	0.0124451	0.0348021	0.00109806	0.00843774
1186.01	0.0124556	0.0351382	0.00102665	0.0083513
1186.49	0.012466	0.0354847	0.000959893	0.00828574
1186.97	0.0124754	0.035839	0.000900622	0.00824154
1187.45	0.0124836	0.0361995	0.000851717	0.00821857
1187.94	0.0124905	0.0365671	0.000814967	0.00821567
1188.42	0.0124963	0.0369442	0.000790601	0.0082308
1188.9	0.0125015	0.0373326	0.000777623	0.00826102
1189.38	0.012506	0.0377308	0.000773739	0.00830212
1189.86	0.012509	0.0381341	0.000776428	0.00834971
1190.35	0.0125093	0.0385349	0.000782403	0.00839923
1190.83	0.0125052	0.0389258	0.000788875	0.00844714
1191.31	0.0124949	0.0393024	0.00079339	0.0084916
1191.79	0.0124776	0.039664	0.000794021	0.00853248
1192.28	0.0124529	0.0400134	0.000789971	0.00857057
1192.76	0.0124219	0.0403541	0.000781208	0.00860687
1193.24	0.0123866	0.0406879	0.000768727	0.00864137
1193.72	0.0123493	0.0410128	0.000753525	0.00867308
1194.2	0.0123123	0.0413246	0.000737195	0.00870066
1194.68	0.0122774	0.041618	0.000720832	0.00872244
1195.17	0.0122455	0.04189	0.000705234	0.00873778
1195.65	0.0122167	0.0421411	0.000690698	0.00874725
1196.13	0.0121905	0.0423741	0.000677158	0.00875222
1196.61	0.012166	0.0425921	0.000664448	0.00875414
1197.1	0.0121424	0.0427966	0.000652037	0.00875371
1197.58	0.0121188	0.0429853	0.000638996	0.00875005
1198.06	0.0120947	0.0431542	0.000624097	0.00874147
1198.54	0.0120694	0.0432987	0.000605748	0.00872554
1199.02	0.0120424	0.0434172	0.000582191	0.00870002
1199.51	0.0120133	0.043511	0.000552364	0.00866379
1199.99	0.0119818	0.0435844	0.000516071	0.00861663
1200.47	0.0119483	0.0436421	0.000474606	0.00855911
1200.95	0.0119135	0.0436871	0.000430028	0.00849268
1201.43	0.0118779	0.0437189	0.000385122	0.00841842
1201.92	0.0118428	0.0437348	0.000341813	0.00833779
1202.4	0.011809	0.0437322	0.000301326	0.00825268
1202.88	0.0117767	0.0437101	0.000262965	0.00816502
1203.36	0.011746	0.0436708	0.000225502	0.00807725
1203.85	0.0117167	0.0436189	0.00018748	0.00799179
1204.33	0.0116884	0.0435595	0.00014767	0.00790989
1204.81	0.011661	0.0434958	0.00010634	0.00783218
1205.29	0.0116346	0.0434286	6.42516e-05	0.00775814
1205.77	0.0116094	0.0433565	2.31282e-05	0.00768609
1206.26	0.0115854	0.0432786	-1.5639e-05	0.00761497
1206.74	0.0115626	0.0431961	-5.07915e-05	0.0075443
1207.22	0.0115404	0.0431125	-8.20984e-05	0.00747475
1207.7	0.0115182	0.043033	-0.000108964	0.00740841
1208.18	0.011495	0.0429622	-0.00013086	0.00734752
1208.67	0.0114701	0.0429022	-0.000147421	0.00729417
1209.15	0.0114432	0.0428519	-0.000158617	0.00724899
1209.63	0.0114141	0.0428086	-0.000165075	0.00721159
1210.11	0.0113834	0.0427699	-0.000169249	0.00717983
1210.6	0.0113512	0.042736	-0.000174316	0.0071515
1211.08	0.011318	0.0427109	-0.000184219	0.00712425
1211.56	0.0112839	0.0427003	-0.000201872	0.00709646
1212.04	0.0112489	0.0427097	-0.000228267	0.00706756
1212.52	0.0112125	0.0427422	-0.00026168	0.0070381
1213.01	0.0111745	0.0427967	-0.00029827	0.00700931
1213.49	0.0111351	0.0428695	-0.000333499	0.00698304
1213.97	0.0110942	0.0429568	-0.000362733	0.00696176
1214.45	0.0110528	0.0430564	-0.000383423	0.00694749
1214.93	0.0110115	0.0431689	-0.000395209	0.006942
1215.42	0.0109713	0.0432964	-0.000399479	0.0069459
1215.9	0.0109329	0.0434406	-0.000398618	0.00695887
1216.38	0.0108962	0.0435996	-0.000394878	0.00697877
1216.86	0.0108613	0.0437681	-0.000390342	0.00700277
1217.35	0.0108271	0.0439375	-0.000386105	0.00702759
1217.83	0.0107932	0.0440999	-0.000382828	0.00705042
1218.31	0.0107592	0.044249	-0.000381338	0.00706945
1218.79	0.0107256	0.044382	-0.000382166	0.0070839
1219.27	0.0106933	0.0444984	-0.000385542	0.00709464
1219.76	0.0106639	0.0445974	-0.000390342	0.00710306
1220.24	0.0106388	0.0446766	-0.00039458	0.00711044
1220.72	0.0106183	0.0447313	-0.000394878	0.00711839
1221.2	0.0106019	0.0447551	-0.000388157	0.00712782
1221.68	0.0105882	0.044744	-0.000371969	0.0071393
1222.17	0.0105752	0.0446966	-0.000346179	0.00715288
1222.65	0.0105611	0.0446155	-0.000313203	0.00716763
1223.13	0.0105453	0.0445054	-0.00027731	0.00718151
1223.61	0.0105279	0.0443708	-0.000243931	0.00719145
1224.09	0.01051	0.0442135	-0.000218365	0.00719334
1224.58	0.0104928	0.0440324	-0.000204124	0.0071833
1225.06	0.010477	0.0438257	-0.000202468	0.00715874
1225.54	0.0104625	0.0435925	-0.0002129	0.00711882
1226.02	0.0104484	0.0433365	-0.00023277	0.00706575
1226.51	0.0104336	0.0430653	-0.000258932	0.00700348
1226.99	0.0104169	0.0427895	-0.000287906	0.00693735
1227.47	0.0103987	0.042519	-0.000316944	0.00687181
1227.95	0.01038	0.0422614	-0.000343431	0.00681041
1228.43	0.0103625	0.0420204	-0.000365679	0.00675491
1228.92	0.0103479	0.0417964	-0.000383423	0.00670524
1229.4	0.010337	0.0415891	-0.000396963	0.00666026
1229.88	0.0103298	0.0414006	-0.00040706	0.00661958
1230.36	0.0103255	0.041234	-0.000415468	0.00658241
1230.84	0.0103229	0.0410946	-0.000423379	0.0065491
1231.33	0.0103205	0.0409857	-0.000431555	0.00651984
1231.81	0.0103181	0.0409078	-0.000439897	0.00649495
1232.29	0.0103158	0.0408577	-0.000447344	0.00647464
1232.77	0.010314	0.0408303	-0.000452607	0.00645917
1233.26	0.0103135	0.0408203	-0.000454725	0.00644884
1233.74	0.0103146	0.0408261	-0.000452938	0.00644471
1234.22	0.010317	0.0408487	-0.000447145	0.00644837
1234.7	0.0103205	0.0408914	-0.000438175	0.00646065
1235.18	0.0103245	0.0409568	-0.000426656	0.00648173
1235.66	0.0103286	0.0410445	-0.000413713	0.00651039
1236.15	0.0103326	0.0411511	-0.000400009	0.00654386
1236.63	0.0103369	0.0412711	-0.000386601	0.00657857
1237.11	0.0103416	0.0414009	-0.000374452	0.00661184
1237.59	0.0103473	0.0415403	-0.000364951	0.00664165
1238.08	0.0103549	0.0416936	-0.000359058	0.00666853
1238.56	0.0103651	0.0418669	-0.000356707	0.00669421
1239.04	0.0103794	0.0420658	-0.000357038	0.00672156
1239.52	0.0103991	0.0422916	-0.000357634	0.0067534
1240	0.010425	0.0425411	-0.000355747	0.00679113
1240.49	0.0104574	0.0428079	-0.000348662	0.00683518
1240.97	0.0104952	0.0430861	-0.000334889	0.0068847
1241.45	0.0105361	0.0433731	-0.000314924	0.00693799
1241.93	0.0105775	0.0436702	-0.000291316	0.00699304
1242.41	0.0106157	0.0439816	-0.00026764	0.0070479
1242.9	0.0106483	0.0443111	-0.000247772	0.00710081
1243.38	0.0106732	0.0446592	-0.000234658	0.00715035
1243.86	0.01069	0.0450221	-0.000229194	0.00719596
1244.34	0.0106989	0.0453935	-0.00023032	0.00723818
1244.83	0.0107009	0.0457668	-0.000235585	0.00727834
1245.31	0.0106975	0.0461386	-0.000242175	0.00731864
1245.79	0.01069	0.0465088	-0.000247308	0.0073613
1246.27	0.0106797	0.046879	-0.000249196	0.00740764
1246.75	0.0106675	0.0472495	-0.000247341	0.00745729
1247.24	0.0106551	0.047617	-0.000242076	0.00750816
1247.72	0.0106432	0.0479742	-0.000234559	0.00755681
1248.2	0.0106329	0.0483117	-0.000226346	0.00759973
1248.68	0.0106243	0.0486217	-0.000219093	0.00763449
1249.16	0.010617	0.0489006	-0.000214192	0.00766036
1249.65	0.0106101	0.0491491	-0.000212635	0.0076786
1250.13	0.010602	0.0493721	-0.000214589	0.00769213
1250.61	0.0105913	0.0495737	-0.000219557	0.00770366
1251.09	0.0105775	0.0497565	-0.000225915	0.00771564
1251.58	0.0105605	0.0499196	-0.000231876	0.00772909
1252.06	0.0105405	0.0500614	-0.000235652	0.007744
1252.54	0.0105185	0.0501809	-0.00023648	0.00775996
1253.02	0.0104956	0.0502808	-0.000234459	0.00777611
1253.5	0.0104722	0.0503666	-0.00023075	0.00779204
1253.99	0.0104492	0.0504448	-0.000226611	0.00780779
1254.47	0.0104271	0.0505202	-0.000222571	0.00782358
1254.95	0.010407	0.0505938	-0.000217437	0.00784011
1255.43	0.0103897	0.0506632	-0.000208032	0.0078587
1255.91	0.0103764	0.0507251	-0.000189552	0.00788195
1256.4	0.0103679	0.0507776	-0.000157093	0.00791252
1256.88	0.0103649	0.0508233	-0.000107573	0.00795372
1257.36	0.0103665	0.0508677	-4.07861e-05	0.00800765
1257.84	0.0103721	0.0509169	3.90005e-05	0.00807357
1258.33	0.0103798	0.0509742	0.000123376	0.00814753
1258.81	0.0103882	0.0510379	0.000200971	0.00822175
1259.29	0.0103957	0.0511028	0.000260943	0.0082877
1259.77	0.0104012	0.0511624	0.000294429	0.00833711
1260.25	0.0104045	0.0512142	0.000298243	0.00836572
1260.73	0.0104058	0.0512616	0.000275199	0.00837451
1261.22	0.0104059	0.0513145	0.000233724	0.00836971
1261.7	0.0104063	0.0513848	0.000185855	0.00836096
1262.18	0.0104078	0.0514822	0.00014303	0.00835762
1262.66	0.0104119	0.0516114	0.00011456	0.00836697
1263.15	0.0104196	0.0517711	0.000104584	0.0083922
1263.63	0.0104307	0.0519572	0.000112173	0.00843271
1264.11	0.0104452	0.0521657	0.000131595	0.00848471
1264.59	0.0104623	0.0523968	0.000155791	0.00854401
1265.07	0.0104817	0.0526535	0.000178032	0.00860687
1265.56	0.0105027	0.0529411	0.000194275	0.00867166
1266.04	0.0105252	0.0532627	0.000204585	0.00873785
1266.52	0.0105501	0.053618	0.000212275	0.00880669
1267	0.010578	0.0540033	0.000222983	0.00887976
1267.48	0.0106094	0.0544147	0.000242178	0.00895901
1267.97	0.010645	0.0548504	0.000273608	0.00904615
1268.45	0.010684	0.0553124	0.000317441	0.00914204
1268.93	0.0107253	0.0558063	0.000370464	0.00924658
1269.41	0.0107666	0.0563367	0.000425616	0.00935754
1269.9	0.0108053	0.056905	0.000474042	0.00947067
1270.38	0.010839	0.0575068	0.000507015	0.00958074
1270.86	0.0108658	0.0581337	0.000517365	0.00968193
1271.34	0.0108847	0.0587767	0.000501674	0.0097702
1271.82	0.0108961	0.0594317	0.000461272	0.0098451
1272.31	0.0109013	0.0601005	0.000402102	0.00990998
1272.79	0.0109028	0.0607907	0.000333523	0.00997158
1273.27	0.0109033	0.0615102	0.000265419	0.0100373
1273.75	0.0109053	0.0622641	0.000207568	0.0101147
1274.23	0.010911	0.063051	0.000166431	0.0102078
1274.72	0.0109214	0.0638651	0.000144687	0.0103179
1275.2	0.0109365	0.0646989	0.000141539	0.0104437
1275.68	0.0109558	0.065549	0.000153272	0.0105825
1276.16	0.010978	0.0664174	0.000175381	0.0107314
1276.64	0.0110016	0.0673116	0.000203889	0.0108885
1277.13	0.0110253	0.0682398	0.000236277	0.0110522
1277.61	0.0110477	0.0692065	0.000271386	0.0112214
1278.09	0.0110678	0.0702109	0.000308422	0.0113936
1278.57	0.0110847	0.0712473	0.000346555	0.0115664
1279.06	0.0110975	0.0723086	0.000383464	0.0117365
1279.54	0.0111054	0.0733922	0.000416164	0.0119019
1280.02	0.0111081	0.0745006	0.000441736	0.012062
1280.5	0.0111052	0.075641	0.00045832	0.0122179
1280.98	0.0110974	0.0768209	0.000466081	0.0123721
1281.47	0.0110855	0.0780429	0.000467707	0.0125271
1281.95	0.0110709	0.0793033	0.000467541	0.0126851
1282.43	0.0110549	0.0805942	0.00047109	0.0128479
1282.91	0.011039	0.0819083	0.00048333	0.0130168
1283.39	0.0110244	0.0832436	0.000508309	0.0131938
1283.88	0.0110125	0.084606	0.000548184	0.0133815
1284.36	0.0110041	0.0860064	0.000603625	0.0135828
1284.84	0.0110001	0.0874564	0.000672844	0.0137993
1285.32	0.0110006	0.0889619	0.000751799	0.0140305
1285.81	0.0110054	0.0905219	0.000834487	0.0142727
1286.29	0.0110127	0.0921286	0.000912276	0.014519
1286.77	0.0110203	0.0937736	0.000975899	0.0147612
1287.25	0.0110251	0.0954534	0.00101778	0.014993
1287.73	0.0110247	0.0971708	0.00103312	0.0152106
1288.22	0.0110174	0.0989336	0.00102226	0.015415
1288.7	0.0110033	0.100749	0.000990312	0.0156102
1289.18	0.0109843	0.102619	0.00094588	0.0158026
1289.66	0.0109629	0.104541	0.000898032	0.0159978
1290.14	0.010942	0.106507	0.000853875	0.0161994
1290.63	0.0109235	0.108513	0.000817291	0.0164089
1291.11	0.0109082	0.110561	0.00078851	0.0166254
1291.59	0.0108952	0.112656	0.000765939	0.0168483
1292.07	0.0108829	0.114811	0.000748447	0.017077
1292.56	0.0108698	0.117031	0.00073673	0.0173127
1293.04	0.0108547	0.119314	0.000733577	0.0175576
1293.52	0.0108373	0.121647	0.000742539	0.0178137
1294	0.0108178	0.124016	0.00076481	0.0180823
1294.48	0.0107965	0.126407	0.000798502	0.0183625
1294.97	0.0107733	0.12882	0.000837541	0.0186519
1295.45	0.0107479	0.131258	0.000873629	0.0189467
1295.93	0.01072	0.133735	0.000898696	0.0192429
1296.41	0.0106894	0.136256	0.000908292	0.0195367
1296.89	0.0106573	0.138819	0.000902846	0.0198266
1297.38	0.0106249	0.141411	0.000887905	0.0201125
1297.86	0.0105939	0.144016	0.000871238	0.0203967
1298.34	0.0105653	0.146623	0.000860216	0.0206824
1298.82	0.0105392	0.149231	0.000859983	0.0209732
1299.31	0.0105144	0.151848	0.000872367	0.0212723
1299.79	0.0104893	0.154488	0.000896272	0.0215815
1300.27	0.0104617	0.157156	0.000929841	0.0219003
1300.75	0.0104305	0.159846	0.000971516	0.0222272
1301.23	0.0103952	0.162542	0.0010201	0.0225588
1301.71	0.0103564	0.165223	0.00107441	0.0228915
1302.2	0.010315	0.167876	0.00113267	0.023222
1302.68	0.0102722	0.170498	0.00119198	0.0235483
1303.16	0.010229	0.173101	0.00124923	0.0238695
1303.64	0.010186	0.175696	0.00130246	0.024186
1304.13	0.0101446	0.178289	0.00135175	0.0244989
1304.61	0.0101057	0.180874	0.00140008	0.0248097
1305.09	0.0100707	0.183436	0.00145074	0.0251192
1305.57	0.0100401	0.185956	0.00150623	0.025427
1306.05	0.0100135	0.188424	0.00156535	0.0257315
1306.54	0.00998883	0.190846	0.00162305	0.0260291
1307.02	0.00996371	0.193236	0.00167241	0.0263151
1307.5	0.00993547	0.195608	0.0017081	0.0265852
1307.98	0.00990347	0.197968	0.00173059	0.0268374
1308.46	0.00986893	0.200305	0.00174795	0.0270738
1308.95	0.00983568	0.202598	0.00177424	0.0273013
1309.43	0.00980843	0.204827	0.00182438	0.0275298
1309.91	0.00979179	0.206984	0.0019098	0.0277697
1310.39	0.0097881	0.209079	0.00203129	0.0280273
1310.88	0.00979633	0.211128	0.00217862	0.0283014
1311.36	0.00981223	0.21315	0.00233013	0.0285808
1311.84	0.00982961	0.215148	0.00246157	0.0288477
1312.32	0.00984168	0.217107	0.00255218	0.029082
1312.8	0.00984361	0.218998	0.00259121	0.0292673
1313.29	0.00983385	0.220797	0.00258224	0.0293988
1313.77	0.00981412	0.222492	0.00254128	0.0294843
1314.25	0.00978921	0.224097	0.00249226	0.0295432
1314.73	0.00976461	0.225635	0.00245777	0.0295984
1315.21	0.00974594	0.22713	0.00245537	0.0296713
1315.7	0.00973713	0.22859	0.00249272	0.0297753
1316.18	0.00973998	0.230001	0.00256644	0.0299123
1316.66	0.00975407	0.231338	0.00266308	0.0300735
1317.14	0.00977613	0.232573	0.00276167	0.0302424
1317.62	0.00980162	0.233696	0.00283897	0.0303996
1318.11	0.00982429	0.234715	0.00287266	0.0305268
1318.59	0.00983798	0.235658	0.00284748	0.0306107
1319.07	0.00983809	0.236545	0.0027592	0.0306457
1319.55	0.009823	0.237388	0.00261618	0.0306342
1320.04	0.00979413	0.238176	0.00243777	0.0305858
1320.52	0.0097558	0.238888	0.00224836	0.0305151
1321	0.00971429	0.23951	0.00207377	0.0304399
1321.48	0.00967546	0.240043	0.00193309	0.0303773
1321.96	0.00964338	0.240507	0.00183516	0.0303396
1322.45	0.00962017	0.240932	0.00177923	0.0303333
1322.93	0.00960527	0.241344	0.00175677	0.0303571
1323.41	0.0095967	0.241751	0.001756	0.0304034
1323.89	0.00959196	0.24214	0.00176599	0.030461
1324.38	0.00958918	0.242487	0.00178039	0.0305197
1324.86	0.00958789	0.242774	0.00179716	0.0305726
1325.34	0.00958823	0.243002	0.00181729	0.0306178
1325.82	0.00959057	0.243192	0.00184135	0.0306565
1326.3	0.00959487	0.243373	0.0018683	0.0306911
1326.79	0.00959998	0.243574	0.00189406	0.0307216
1327.27	0.00960422	0.243802	0.00191406	0.0307454
1327.75	0.00960551	0.244042	0.00192444	0.0307577
1328.23	0.00960212	0.244269	0.00192314	0.0307541
1328.71	0.00959341	0.244465	0.00191053	0.0307322
1329.2	0.00957908	0.24463	0.00188783	0.0306937
1329.68	0.00955957	0.244784	0.00185566	0.0306426
1330.16	0.00953488	0.24496	0.00181356	0.0305831
1330.64	0.00950532	0.245183	0.00176169	0.0305192
1331.12	0.00947135	0.245458	0.00170251	0.0304532
1331.61	0.00943393	0.245769	0.00164264	0.0303872
1332.09	0.00939573	0.246085	0.00159425	0.030326
1332.57	0.00936022	0.24638	0.0015728	0.0302782
1333.05	0.00933103	0.24665	0.00159325	0.0302553
1333.54	0.0093114	0.246912	0.00166858	0.0302712
1334.02	0.00930348	0.247194	0.00180711	0.0303382
1334.5	0.00930829	0.24752	0.00201358	0.0304649
1334.98	0.00932562	0.247894	0.00229039	0.0306557
1335.46	0.00935541	0.248294	0.00263908	0.0309107
1335.95	0.00939773	0.248685	0.00305838	0.0312272
1336.43	0.00945238	0.249032	0.00353942	0.0315981
1336.91	0.00951791	0.249313	0.00406058	0.0320107
1337.39	0.00958962	0.24953	0.0045802	0.0324405
1337.87	0.00965778	0.249693	0.00503319	0.0328459
1338.36	0.00970877	0.249813	0.00534568	0.0331736
1338.84	0.00972639	0.249887	0.0054476	0.0333634
1339.32	0.00969752	0.249897	0.00529912	0.0333677
1339.8	0.00961753	0.249829	0.00490958	0.0331726
1340.29	0.00949227	0.249684	0.00433883	0.0328051
1340.77	0.00933706	0.24949	0.00368047	0.0323284
1341.25	0.00917033	0.249285	0.00302695	0.0318179
1341.73	0.00901015	0.249112	0.0024559	0.0313457
1342.21	0.00886969	0.248988	0.00201221	0.0309625
1342.69	0.0087554	0.248903	0.0017066	0.0306886
1343.18	0.00866865	0.24882	0.00152565	0.0305199
1343.66	0.00860589	0.248695	0.00144044	0.0304336
1344.14	0.00856107	0.248494	0.00141946	0.0304006
1344.62	0.00852742	0.248207	0.00143462	0.0303933
1345.11	0.0084994	0.247848	0.00146886	0.0303946
1345.59	0.0084739	0.247439	0.00151538	0.0303984
1346.07	0.00844984	0.246993	0.00157343	0.0304053
1346.55	0.00842741	0.246504	0.00164354	0.0304175
1347.03	0.00840714	0.245943	0.00172327	0.0304331
1347.52	0.00838869	0.245277	0.00180474	0.0304451
1348	0.00837052	0.244485	0.00187689	0.0304434
1348.48	0.00835066	0.243577	0.0019289	0.0304189
1348.96	0.00832647	0.242587	0.00195346	0.0303671
1349.44	0.00829716	0.241559	0.00195043	0.0302897
1349.93	0.00826362	0.240526	0.00192784	0.0301943
1350.41	0.00822877	0.239498	0.00190051	0.0300919
1350.89	0.00819666	0.238464	0.00188474	0.0299932
1351.37	0.00817151	0.237398	0.00189572	0.0299082
1351.86	0.00815601	0.236284	0.00194215	0.0298435
1352.34	0.00815057	0.235126	0.00202383	0.0298023
1352.82	0.00815273	0.233947	0.00213037	0.0297827
1353.3	0.00815787	0.232779	0.00224429	0.0297783
1353.78	0.0081607	0.231645	0.00234622	0.0297785
1354.27	0.00815638	0.230549	0.00241945	0.0297703
1354.75	0.00814227	0.229479	0.00245567	0.029742
1355.23	0.00811874	0.228416	0.0024575	0.0296883
1355.71	0.00808829	0.227351	0.00243851	0.0296121
1356.19	0.00805531	0.226293	0.00241851	0.0295251
1356.68	0.00802375	0.22527	0.00241935	0.0294442
1357.16	0.00799752	0.224314	0.00246347	0.0293902
1357.64	0.00798014	0.223445	0.00257091	0.0293817
1358.12	0.00797471	0.222663	0.0027597	0.0294347
1358.61	0.00798554	0.221946	0.00304617	0.0295627
1359.09	0.00801734	0.221261	0.00344168	0.0297757
1359.57	0.00807452	0.220582	0.00394621	0.0300789
1360.05	0.00815837	0.219895	0.00453915	0.0304664
1360.53	0.00826575	0.219203	0.00517359	0.0309164
1361.02	0.00838457	0.218518	0.00577173	0.0313814
1361.5	0.00849413	0.217848	0.0062303	0.031787
1361.98	0.0085701	0.217193	0.00645547	0.0320511
[truncated: 5,472 more rows]
