# Supplementary material for: Ionogel thin films as a compatibilizing pretreatment for electrospray deposition
Source: Royal Society of Chemistry journal article supplement (doi:10.1039/d5lp00359h), 2026-01-01
Supplement: d5lp00359h1.zip [file FTIR - Pre-Rinse Absorbance.xlsx]

## Sheet: v2 - Pre-Rinse FTIR
Wavelength	Al2O3 only	IG only	PS only	PS on IG
cm^-1
	Absorbance	Absorbance	Absorbance	Absorbance
399.675	0	0	0	0
400.157	0.277954	0.417835	0.0440277	0.0512483
400.639	0.279084	0.429789	0.0427101	0.0477805
401.121	0.279779	0.443775	0.0427137	0.0449658
401.603	0.277868	0.453561	0.0439708	0.0425163
402.085	0.272552	0.455615	0.0461075	0.0402762
402.567	0.264943	0.451072	0.0485155	0.0382161
403.05	0.257526	0.444769	0.0505869	0.0364175
403.532	0.252517	0.441453	0.0519615	0.0349707
404.014	0.251142	0.444016	0.0525054	0.0339544
404.496	0.253156	0.4525	0.052343	0.0334165
404.978	0.257142	0.464395	0.0517463	0.033376
405.46	0.260931	0.475153	0.0511559	0.0337993
405.942	0.262772	0.480635	0.0509945	0.034588
406.424	0.262247	0.479892	0.0515117	0.0356071
406.906	0.260299	0.475683	0.0526997	0.036707
407.389	0.258346	0.472215	0.054358	0.0377849
407.871	0.257306	0.472358	0.0562104	0.0387535
408.353	0.25721	0.47666	0.0579728	0.0395111
408.835	0.25724	0.48319	0.0593985	0.0399357
409.317	0.25627	0.488626	0.0603054	0.0399225
409.799	0.253582	0.489948	0.0605986	0.0394393
410.281	0.249461	0.486713	0.0603146	0.0385705
410.764	0.245001	0.481129	0.0595809	0.0374815
411.246	0.241417	0.476486	0.0585524	0.0363171
411.728	0.239332	0.474934	0.0573511	0.0351494
412.21	0.238627	0.476712	0.0560587	0.0339759
412.692	0.238586	0.480182	0.0547531	0.0327648
413.174	0.238381	0.483011	0.0535209	0.031526
413.656	0.237552	0.483494	0.0524447	0.0303501
414.138	0.236328	0.48181	0.0515714	0.0293869
414.62	0.23541	0.479604	0.0508617	0.028768
415.103	0.235552	0.478814	0.0502085	0.028565
415.585	0.237085	0.480318	0.0494534	0.0287674
416.067	0.239763	0.483403	0.0484243	0.0292777
416.549	0.242669	0.485542	0.0469555	0.0299088
417.031	0.244443	0.483095	0.0449729	0.0303728
417.513	0.243895	0.473319	0.0425761	0.0303467
417.995	0.240758	0.456968	0.0401596	0.0295918
418.477	0.236206	0.439233	0.0383161	0.0281784
418.959	0.232045	0.42626	0.0375356	0.0264953
419.442	0.229501	0.421227	0.037947	0.0250511
419.924	0.228443	0.422758	0.039294	0.0241549
420.406	0.227872	0.426961	0.0411353	0.0238401
420.888	0.226695	0.429816	0.0430148	0.0239586
421.37	0.224418	0.42929	0.0445912	0.024296
421.852	0.221219	0.425607	0.0456595	0.0246696
422.334	0.217725	0.420502	0.0461474	0.0249593
422.816	0.214542	0.415922	0.0461267	0.0251231
423.298	0.211976	0.413129	0.0457819	0.0251782
423.781	0.209858	0.412208	0.045388	0.0251868
424.263	0.207668	0.412177	0.0452219	0.0252263
424.745	0.204821	0.411581	0.0454863	0.0253632
425.227	0.201025	0.409391	0.0462063	0.0256286
425.709	0.196482	0.405655	0.0472151	0.0260064
426.191	0.19172	0.401278	0.0481981	0.0264389
426.673	0.187304	0.397339	0.0487973	0.0268496
427.155	0.183519	0.394359	0.0487328	0.0271673
427.637	0.180332	0.392076	0.0478316	0.0273344
428.12	0.177427	0.389558	0.0460782	0.027317
428.602	0.174434	0.385786	0.0436345	0.0271223
429.084	0.171082	0.380149	0.0407941	0.0267837
429.566	0.167354	0.37286	0.0379013	0.0263494
430.048	0.163432	0.364756	0.0352429	0.025864
430.53	0.159552	0.35683	0.0330082	0.0253407
431.012	0.155843	0.34964	0.0312552	0.0247652
431.495	0.152256	0.343111	0.0299434	0.0241057
431.977	0.148599	0.336651	0.0289715	0.0233405
432.459	0.144676	0.329564	0.0282062	0.0224808
432.941	0.140383	0.321466	0.0275207	0.0215759
433.423	0.135746	0.31244	0.0267981	0.0207051
433.905	0.130862	0.302919	0.0259655	0.0199493
434.387	0.125788	0.293347	0.0249896	0.0193705
434.869	0.120452	0.283895	0.0238767	0.0190024
435.351	0.114662	0.274341	0.0226524	0.0188392
435.834	0.108176	0.264202	0.0213487	0.0188409
436.316	0.100844	0.253037	0.0199717	0.0189347
436.798	0.0927327	0.240775	0.018488	0.0190367
437.28	0.0841135	0.227768	0.016831	0.0190732
437.762	0.0753616	0.214626	0.014929	0.018994
438.244	0.0668179	0.201903	0.0127514	0.0187806
438.726	0.0587651	0.189993	0.0103343	0.0184412
439.208	0.0514202	0.179079	0.00779025	0.0180075
439.69	0.0449335	0.16919	0.00528386	0.0175262
440.173	0.0394382	0.160356	0.0030172	0.0170665
440.655	0.0350017	0.152622	0.00116194	0.0167047
441.137	0.0315918	0.146059	-0.000200216	0.0165016
441.619	0.0290678	0.140742	-0.00108508	0.0164913
442.101	0.0272128	0.136681	-0.00159397	0.0166602
442.583	0.0258066	0.133793	-0.00185043	0.0169529
443.065	0.02466	0.131895	-0.00196306	0.0172842
443.547	0.0236646	0.130739	-0.00199475	0.0175733
444.029	0.0227799	0.130061	-0.00198552	0.0177627
444.512	0.0219963	0.129621	-0.00197143	0.0178349
444.994	0.0213078	0.129261	-0.00200118	0.0178156
445.476	0.0206967	0.128902	-0.00212175	0.0177509
445.958	0.0201387	0.128531	-0.00235292	0.017698
446.44	0.0196206	0.12816	-0.00266542	0.0176971
446.922	0.0191513	0.1278	-0.00298036	0.0177658
447.404	0.0187644	0.12745	-0.00318941	0.0178968
447.886	0.0184948	0.127098	-0.00321644	0.0180628
448.369	0.0183605	0.12674	-0.00304627	0.0182299
448.851	0.0183438	0.126392	-0.00274465	0.0183712
449.333	0.0183981	0.126085	-0.00241507	0.0184776
449.815	0.0184621	0.125857	-0.00216296	0.018556
450.297	0.0184844	0.125732	-0.00203881	0.018629
450.779	0.0184394	0.125713	-0.00202608	0.018726
451.261	0.0183275	0.125773	-0.00204808	0.0188775
451.743	0.0181719	0.125873	-0.00200804	0.0191074
452.226	0.0180003	0.125981	-0.00184205	0.019426
452.708	0.0178387	0.126089	-0.00155049	0.0198268
453.19	0.0177058	0.126217	-0.00119294	0.020294
453.672	0.0176194	0.126394	-0.000846214	0.0208096
454.154	0.0176075	0.12664	-0.000562847	0.0213621
454.636	0.0177089	0.126938	-0.000343265	0.0219538
455.118	0.0179609	0.127241	-0.000138412	0.0225986
455.6	0.0183835	0.127471	0.000123342	0.0233152
456.082	0.0189508	0.127558	0.000497594	0.0241186
456.565	0.019583	0.127467	0.00099267	0.025004
457.047	0.0201516	0.127239	0.00155531	0.0259366
457.529	0.0205424	0.126975	0.00209874	0.0268526
458.011	0.0207028	0.126801	0.00255075	0.02768
458.493	0.0206801	0.126802	0.0028916	0.0283636
458.975	0.020585	0.126985	0.0031614	0.0288901
459.457	0.0205453	0.127286	0.00342001	0.0292883
459.939	0.0206548	0.127605	0.00371249	0.0296184
460.421	0.0209434	0.127851	0.00404473	0.0299464
460.904	0.0213927	0.12796	0.00438897	0.0303323
461.386	0.0219535	0.127906	0.00470635	0.0308137
461.868	0.0225807	0.127703	0.00497661	0.0314009
462.35	0.0232447	0.127392	0.00520911	0.0320765
462.832	0.0239404	0.127032	0.00545102	0.0328109
463.314	0.0246766	0.126681	0.00576112	0.0335782
463.796	0.0254589	0.126393	0.0061934	0.0343684
464.278	0.0262812	0.126209	0.00677723	0.0351939
464.761	0.0271255	0.126155	0.00751928	0.0360755
465.243	0.0279782	0.126242	0.00842018	0.0370263
465.725	0.0288475	0.126469	0.0094918	0.0380341
466.207	0.0297693	0.126816	0.0107569	0.0390539
466.689	0.0308067	0.127245	0.0122407	0.0400111
467.171	0.0320245	0.127707	0.0139467	0.0408278
467.653	0.0334605	0.128156	0.0158419	0.0414489
468.135	0.0351194	0.128558	0.0178602	0.0418556
468.618	0.036976	0.128909	0.0199373	0.0420597
469.1	0.0390094	0.129217	0.022045	0.0420766
469.582	0.0412311	0.1295	0.02422	0.0418917
470.064	0.0437071	0.129766	0.0265691	0.0414492
470.546	0.0465524	0.130007	0.0292581	0.0406536
471.028	0.0499069	0.130201	0.0324798	0.0394012
471.51	0.0538833	0.130321	0.0363959	0.0376378
471.992	0.0585358	0.130349	0.0411002	0.0353978
472.474	0.0638493	0.13029	0.0465965	0.0328227
472.957	0.0697654	0.130164	0.0528035	0.0301089
473.439	0.0762473	0.129988	0.0595937	0.0274538
473.921	0.0833087	0.129754	0.0668014	0.0249944
474.403	0.0909951	0.129419	0.0742167	0.0227871
474.885	0.0993276	0.128906	0.0815103	0.020834
475.367	0.108201	0.128116	0.0881967	0.0191078
475.849	0.117327	0.126976	0.0936797	0.0175818
476.331	0.12614	0.125456	0.0972387	0.0162428
476.813	0.133863	0.123619	0.0982364	0.0150945
477.296	0.139682	0.121637	0.0963231	0.0141502
477.778	0.14289	0.119811	0.0915659	0.0134253
478.26	0.143204	0.118528	0.0845251	0.0129263
478.742	0.140876	0.1182	0.0761077	0.0126472
479.224	0.136681	0.119239	0.0674116	0.01257
479.706	0.131662	0.121964	0.0593957	0.0126707
480.188	0.126859	0.126581	0.0527379	0.012925
480.67	0.123159	0.133174	0.0478193	0.0133089
481.152	0.121087	0.141698	0.0446997	0.0138033
481.635	0.120844	0.151986	0.043222	0.0143917
482.117	0.122344	0.163729	0.0430807	0.0150592
482.599	0.125325	0.176577	0.0439313	0.0157943
483.081	0.129456	0.190181	0.0454393	0.0165905
483.563	0.13446	0.204304	0.0473382	0.017447
484.045	0.140216	0.218913	0.0494787	0.0183645
484.527	0.146764	0.234206	0.0518148	0.0193413
485.01	0.154282	0.250571	0.0543866	0.0203671
485.492	0.162994	0.26846	0.0572746	0.0214199
485.974	0.173114	0.288329	0.06057	0.0224696
486.456	0.184782	0.310531	0.064334	0.0234846
486.938	0.198025	0.33527	0.068573	0.024441
487.42	0.212742	0.362569	0.073231	0.0253271
487.902	0.228693	0.392224	0.0781813	0.0261413
488.384	0.245519	0.423804	0.0832489	0.0268863
488.866	0.262681	0.456487	0.0882019	0.02756
489.349	0.279539	0.489124	0.0928023	0.0281516
489.831	0.295451	0.520399	0.0968496	0.0286416
490.313	0.309835	0.548994	0.100207	0.0290082
490.795	0.322347	0.574013	0.102842	0.0292376
491.277	0.332894	0.595156	0.104808	0.0293309
491.759	0.341593	0.612726	0.106222	0.0293071
492.241	0.348616	0.627257	0.107204	0.0291973
492.723	0.354095	0.63921	0.107847	0.0290388
493.205	0.358096	0.648832	0.10821	0.0288691
493.688	0.360676	0.65617	0.108332	0.028719
494.17	0.361986	0.661328	0.108255	0.0286121
494.652	0.362335	0.664653	0.108043	0.0285627
495.134	0.362108	0.666696	0.107768	0.0285746
495.616	0.361684	0.668072	0.107494	0.0286381
496.098	0.361297	0.669196	0.107255	0.0287298
496.58	0.360969	0.670124	0.107041	0.0288179
497.062	0.36056	0.670589	0.106812	0.0288663
497.545	0.359878	0.670224	0.106522	0.0288482
498.027	0.358828	0.668843	0.106151	0.0287582
498.509	0.35748	0.666587	0.105718	0.0286141
498.991	0.356041	0.663888	0.105283	0.028454
499.473	0.354727	0.661195	0.104913	0.0283189
499.955	0.353664	0.658757	0.104659	0.0282425
500.437	0.352791	0.656424	0.104534	0.0282355
500.919	0.351899	0.653726	0.104498	0.0282814
501.401	0.35072	0.650076	0.104474	0.0283401
501.884	0.349096	0.645161	0.104376	0.0283655
502.366	0.347074	0.639146	0.104138	0.028323
502.848	0.344885	0.632599	0.10373	0.0282015
503.33	0.34279	0.626128	0.103154	0.0280122
503.812	0.340942	0.620041	0.102418	0.0277762
504.294	0.339299	0.61418	0.101523	0.0275089
504.776	0.337657	0.607999	0.100453	0.0272125
505.258	0.33573	0.600758	0.0991846	0.0268764
505.74	0.333226	0.591746	0.0976987	0.026485
506.223	0.329925	0.580504	0.0959808	0.0260271
506.705	0.325623	0.566767	0.0940137	0.0255019
507.187	0.320049	0.55035	0.0917591	0.0249178
507.669	0.312862	0.531096	0.0891564	0.0242855
508.151	0.303644	0.508842	0.0861223	0.0236092
508.633	0.292088	0.483662	0.0825894	0.0228864
509.115	0.278214	0.456112	0.0785515	0.0221122
509.597	0.262481	0.427316	0.074093	0.0212897
510.079	0.245779	0.398842	0.0694017	0.0204424
510.562	0.229168	0.372261	0.0647213	0.0196118
511.044	0.213729	0.348991	0.0603281	0.0188574
511.526	0.200259	0.329923	0.056455	0.0182393
512.008	0.189139	0.315307	0.0532392	0.0177977
512.49	0.180405	0.304904	0.0507256	0.0175479
512.972	0.173801	0.298075	0.0488629	0.0174717
513.454	0.168932	0.294026	0.0475416	0.0175294
513.937	0.165379	0.291953	0.0466247	0.0176701
514.419	0.162797	0.291229	0.0459902	0.0178521
514.901	0.160932	0.291445	0.0455499	0.0180519
515.383	0.159585	0.292339	0.0452446	0.0182648
515.865	0.158585	0.293749	0.045044	0.0185004
516.347	0.157768	0.295527	0.0449249	0.0187714
516.829	0.156972	0.297489	0.0448572	0.0190842
517.311	0.156095	0.29947	0.0448033	0.0194348
517.793	0.155109	0.301361	0.0447177	0.0198119
518.275	0.15407	0.303152	0.0445622	0.0202039
518.758	0.153074	0.304931	0.0443223	0.0206062
519.24	0.152213	0.306836	0.0440136	0.0210221
519.722	0.151543	0.309015	0.043685	0.0214598
520.204	0.151079	0.311587	0.0434069	0.0219263
520.686	0.150832	0.314672	0.0432633	0.0224248
521.168	0.150844	0.318412	0.0433349	0.0229544
521.65	0.1512	0.322975	0.0436786	0.0235162
522.132	0.152024	0.32857	0.0443266	0.0241161
522.615	0.153439	0.335384	0.0452797	0.0247675
523.097	0.15552	0.343537	0.0465144	0.025487
523.579	0.158259	0.353023	0.0479833	0.026287
524.061	0.161557	0.36367	0.0496209	0.027165
524.543	0.165247	0.375181	0.0513508	0.0280989
525.025	0.169112	0.387135	0.0530821	0.0290439
525.507	0.172958	0.399114	0.0547296	0.0299459
525.989	0.17665	0.410788	0.0562295	0.0307595
526.471	0.1801	0.421918	0.0575481	0.0314614
526.954	0.183255	0.432331	0.0586866	0.0320576
527.436	0.186054	0.441843	0.0596727	0.0325773
527.918	0.188417	0.450214	0.0605493	0.0330624
528.4	0.190277	0.457211	0.0613575	0.0335517
528.882	0.191607	0.462694	0.0621315	0.034077
529.364	0.192457	0.466705	0.062891	0.0346604
529.846	0.192947	0.469468	0.063639	0.0353126
530.328	0.193231	0.471322	0.0643622	0.0360351
530.811	0.193436	0.472582	0.0650354	0.0368207
531.293	0.193618	0.473411	0.0656307	0.0376537
531.775	0.193755	0.473816	0.0661273	0.0385123
532.257	0.193779	0.473716	0.0665223	0.0393719
532.739	0.193634	0.473069	0.0668343	0.0402128
533.221	0.193315	0.471969	0.0671026	0.041023
533.703	0.192878	0.470643	0.0673743	0.0418012
534.185	0.192405	0.469341	0.0676854	0.0425517
534.668	0.191957	0.468227	0.0680511	0.0432778
535.15	0.191538	0.467274	0.0684569	0.0439748
535.632	0.191092	0.466294	0.0688639	0.0446273
536.114	0.190535	0.465036	0.0692195	0.0452125
536.596	0.189811	0.463346	0.0694733	0.0457088
537.078	0.188925	0.461257	0.069593	0.0461053
537.56	0.187939	0.458977	0.0695622	0.0464038
538.042	0.186938	0.456757	0.0693811	0.0466159
538.524	0.185973	0.454742	0.0690569	0.0467545
539.006	0.185041	0.452892	0.0686	0.0468256
539.489	0.184083	0.450992	0.0680228	0.0468255
539.971	0.183024	0.448779	0.0673462	0.0467434
540.453	0.181821	0.446087	0.0666032	0.0465702
540.935	0.180496	0.442959	0.0658355	0.0463076
541.417	0.179128	0.439625	0.0650845	0.0459688
541.899	0.177814	0.436389	0.0643813	0.0455771
542.381	0.17661	0.433451	0.0637332	0.0451543
542.864	0.175509	0.430826	0.0631235	0.044714
543.346	0.17444	0.428337	0.0625165	0.0442571
543.828	0.17331	0.425735	0.0618733	0.0437751
544.31	0.172047	0.422826	0.0611633	0.0432562
544.792	0.170639	0.419588	0.0603769	0.0426946
545.274	0.169126	0.416174	0.0595266	0.0420924
545.756	0.167579	0.412825	0.0586434	0.04146
546.238	0.166044	0.409732	0.0577648	0.0408106
546.72	0.164518	0.406933	0.056924	0.0401543
547.202	0.162958	0.404312	0.0561448	0.0394986
547.685	0.161305	0.401681	0.0554372	0.0388498
548.167	0.159537	0.398901	0.0547972	0.0382168
548.649	0.157683	0.395947	0.0542067	0.0376141
549.131	0.155816	0.392912	0.053637	0.0370595
549.613	0.15401	0.389918	0.053053	0.0365672
550.095	0.152308	0.387022	0.0524193	0.0361411
550.577	0.15069	0.384149	0.0517117	0.0357703
551.059	0.149087	0.381126	0.050926	0.0354329
551.542	0.147418	0.377761	0.0500826	0.0351011
552.024	0.145632	0.373971	0.049218	0.0347545
552.506	0.143732	0.369828	0.0483729	0.0343853
552.988	0.141768	0.365538	0.0475759	0.0340016
553.47	0.1398	0.36132	0.0468286	0.033618
553.952	0.137868	0.357313	0.0461033	0.0332498
554.434	0.135961	0.3535	0.0453532	0.0329027
554.916	0.134033	0.349737	0.0445342	0.0325716
555.399	0.132024	0.345827	0.0436218	0.0322434
555.881	0.1299	0.341638	0.0426271	0.0319068
556.363	0.127667	0.337169	0.0415912	0.0315595
556.845	0.125371	0.332534	0.0405744	0.0312097
557.327	0.123063	0.327881	0.0396313	0.0308721
557.809	0.120769	0.323295	0.0387914	0.0305584
558.291	0.118473	0.318749	0.0380544	0.0302701
558.773	0.116127	0.314114	0.0373925	0.0299959
559.255	0.113674	0.309246	0.0367666	0.0297163
559.737	0.111079	0.304059	0.0361378	0.0294125
560.22	0.108338	0.298585	0.0354826	0.0290758
560.702	0.10548	0.292945	0.0347935	0.0287123
561.184	0.102533	0.287283	0.0340716	0.0283397
561.666	0.0995097	0.281671	0.0333178	0.0279777
562.148	0.0963918	0.27607	0.032524	0.0276378
562.63	0.0931402	0.270334	0.0316706	0.0273177
563.112	0.0897192	0.264293	0.0307327	0.0270024
563.595	0.0861149	0.257815	0.0296878	0.02667
564.077	0.0823402	0.250862	0.0285229	0.026301
564.559	0.0784224	0.243485	0.0272396	0.0258867
565.041	0.0743863	0.235778	0.0258535	0.0254302
565.523	0.0702373	0.227822	0.024391	0.0249424
566.005	0.0659648	0.219659	0.0228844	0.0244364
566.487	0.0615592	0.211313	0.02137	0.0239225
566.969	0.0570377	0.202837	0.0198854	0.0234079
567.451	0.0524581	0.194347	0.018463	0.0228992
567.933	0.0479204	0.186038	0.0171287	0.0224075
568.416	0.0435477	0.178152	0.0158976	0.0219501
568.898	0.0394496	0.170901	0.0147739	0.0215478
569.38	0.0357117	0.164442	0.013755	0.0212203
569.862	0.0323807	0.158838	0.0128339	0.0209773
570.344	0.0294666	0.154065	0.0120053	0.0208142
570.826	0.0269554	0.150046	0.0112641	0.0207095
571.308	0.024819	0.146685	0.0106055	0.020632
571.79	0.0230231	0.143896	0.0100247	0.0205514
572.273	0.02153	0.141607	0.00951209	0.0204431
572.755	0.0203016	0.139762	0.00905488	0.0202971
573.237	0.0192995	0.138303	0.00863904	0.0201157
573.719	0.0184839	0.13716	0.00824822	0.0199082
574.201	0.0178168	0.136254	0.007867	0.0196831
574.683	0.0172628	0.135503	0.00748338	0.019447
575.165	0.0167888	0.134843	0.0070877	0.0192008
575.647	0.0163702	0.134242	0.00667698	0.0189437
576.13	0.0159887	0.133704	0.00625545	0.0186776
576.612	0.0156329	0.133247	0.00583513	0.0184104
577.094	0.0152962	0.132892	0.0054323	0.0181532
577.576	0.0149749	0.132636	0.00506761	0.0179199
578.058	0.0146666	0.132458	0.00475901	0.0177218
578.54	0.0143698	0.132325	0.00451812	0.0175634
579.022	0.0140845	0.132213	0.00435001	0.0174439
579.504	0.0138115	0.13212	0.00425089	0.0173581
579.986	0.0135535	0.132062	0.00421101	0.0172987
580.469	0.0133137	0.132067	0.00421653	0.0172596
580.951	0.0130949	0.13215	0.00425293	0.0172363
581.433	0.0128994	0.132296	0.00430534	0.0172258
581.915	0.0127279	0.132464	0.00435855	0.017225
582.397	0.0125809	0.132601	0.00439419	0.0172299
582.879	0.0124585	0.132664	0.00439366	0.0172363
583.361	0.0123611	0.132639	0.00433897	0.0172411
583.843	0.0122886	0.132546	0.00421951	0.0172442
584.326	0.0122404	0.132426	0.0040363	0.0172478
584.808	0.0122142	0.132327	0.00380757	0.0172566
585.29	0.0122056	0.132282	0.0035641	0.0172742
585.772	0.0122087	0.1323	0.00334364	0.0173015
586.254	0.0122155	0.132378	0.00318203	0.0173361
586.736	0.0122188	0.132504	0.00309989	0.0173734
587.218	0.0122124	0.132673	0.00309859	0.0174081
587.7	0.0121937	0.132883	0.0031617	0.0174374
588.182	0.012164	0.133132	0.00326177	0.0174609
588.665	0.0121281	0.133406	0.00336915	0.0174802
589.147	0.0120943	0.133672	0.00345885	0.0174961
589.629	0.0120701	0.133888	0.003517	0.0175078
590.111	0.0120617	0.13402	0.00353918	0.0175121
590.593	0.0120704	0.134057	0.00352923	0.0175059
591.075	0.0120926	0.134025	0.00349515	0.0174886
591.557	0.0121195	0.133979	0.00344626	0.0174642
592.039	0.0121414	0.133981	0.00339132	0.0174421
592.521	0.0121499	0.134067	0.00333669	0.0174331
593.004	0.0121423	0.134235	0.00328801	0.0174479
593.486	0.0121208	0.134445	0.00324855	0.0174915
593.968	0.0120931	0.134641	0.00322038	0.0175635
594.45	0.0120679	0.134779	0.00320442	0.0176576
594.932	0.0120521	0.134844	0.00320225	0.017765
595.414	0.0120479	0.134861	0.00321674	0.0178777
595.896	0.0120533	0.134874	0.00325393	0.0179878
596.378	0.0120638	0.134926	0.00332093	0.0180905
596.861	0.012076	0.135034	0.00342275	0.0181805
597.343	0.0120907	0.135187	0.00355872	0.0182528
597.825	0.0121133	0.13535	0.0037183	0.0183026
598.307	0.012152	0.135484	0.00388078	0.0183265
598.789	0.0122153	0.135566	0.00401797	0.0183246
599.271	0.0123073	0.135596	0.004105	0.0183024
599.753	0.012426	0.135597	0.00412597	0.0182705
600.235	0.0125629	0.135595	0.00408286	0.0182431
600.717	0.0127063	0.135612	0.00399497	0.0182346
601.2	0.0128449	0.135656	0.00389469	0.0182567
601.682	0.0129719	0.135724	0.00381861	0.0183167
602.164	0.0130856	0.135817	0.0037932	0.0184165
602.646	0.0131902	0.135944	0.00383181	0.0185534
603.128	0.013292	0.136124	0.00392986	0.018721
603.61	0.013397	0.136369	0.00407092	0.0189104
604.092	0.0135098	0.13668	0.00423095	0.0191104
604.574	0.0136335	0.13703	0.00438723	0.0193074
605.057	0.0137692	0.137377	0.00452418	0.0194894
605.539	0.0139208	0.137669	0.00463411	0.0196465
606.021	0.0140929	0.137877	0.00471865	0.0197757
606.503	0.0142908	0.138003	0.00478484	0.0198814
606.985	0.0145186	0.13808	0.00484381	0.0199747
607.467	0.0147764	0.138158	0.00490737	0.0200704
607.949	0.0150597	0.138281	0.00498633	0.020182
608.431	0.0153596	0.138474	0.00508964	0.0203186
608.913	0.0156672	0.138734	0.00522359	0.0204827
609.396	0.0159763	0.139044	0.00539009	0.0206707
609.878	0.016287	0.139385	0.00558807	0.020876
610.36	0.0166059	0.139753	0.00581468	0.0210918
610.842	0.0169463	0.140165	0.00606775	0.0213136
611.324	0.0173237	0.140646	0.00634716	0.0215374
611.806	0.0177513	0.141212	0.00665669	0.0217609
612.288	0.0182381	0.141863	0.0070016	0.0219793
612.77	0.018787	0.142577	0.00738701	0.0221868
613.253	0.0193962	0.143321	0.00781552	0.0223785
613.735	0.0200618	0.144075	0.00828517	0.0225521
614.217	0.0207802	0.144836	0.00879059	0.0227103
614.699	0.0215504	0.145631	0.00932524	0.0228595
615.181	0.0223732	0.146496	0.0098834	0.0230082
615.663	0.0232511	0.147464	0.0104622	0.023163
616.145	0.0241866	0.148548	0.011063	0.0233255
616.627	0.0251834	0.149736	0.0116898	0.0234921
617.109	0.0262478	0.151004	0.0123484	0.0236563
617.592	0.0273897	0.152336	0.0130451	0.0238121
618.074	0.028626	0.153742	0.0137859	0.023956
618.556	0.029979	0.155259	0.0145755	0.0240876
619.038	0.0314731	0.156939	0.015419	0.0242076
619.52	0.0331361	0.158837	0.0163213	0.0243141
620.002	0.0349958	0.160991	0.017288	0.0244011
620.484	0.0370823	0.163421	0.0183285	0.0244602
620.966	0.0394328	0.166146	0.0194563	0.0244836
621.448	0.0420925	0.169196	0.0206909	0.0244677
621.931	0.0451172	0.172629	0.0220571	0.0244156
622.413	0.0485738	0.176537	0.0235828	0.0243344
622.895	0.0525282	0.181019	0.0252905	0.0242307
623.377	0.0570389	0.186175	0.0271919	0.024106
623.859	0.0621472	0.192076	0.0292778	0.0239524
624.341	0.0678691	0.198763	0.0315188	0.0237564
624.823	0.0741938	0.206262	0.0338633	0.0235031
625.305	0.0810844	0.214607	0.036245	0.0231843
625.788	0.0884836	0.223854	0.0385974	0.0228056
626.27	0.0962965	0.234076	0.0408519	0.0223874
626.752	0.104373	0.245318	0.0429401	0.0219611
627.234	0.112501	0.257539	0.0447943	0.0215589
627.716	0.120368	0.270535	0.0463377	0.021209
628.198	0.127578	0.283894	0.047491	0.0209281
628.68	0.133716	0.297039	0.0481863	0.020718
629.162	0.138352	0.309202	0.0483704	0.0205698
629.644	0.141128	0.319544	0.048019	0.0204669
630.127	0.141793	0.327258	0.0471345	0.0203914
630.609	0.140199	0.331571	0.0457424	0.0203269
631.091	0.136331	0.33189	0.0438835	0.0202606
631.573	0.13031	0.327898	0.0416099	0.0201839
632.055	0.122421	0.319644	0.038989	0.0200905
632.537	0.113087	0.307609	0.0360997	0.0199774
633.019	0.102827	0.292646	0.0330306	0.0198444
633.501	0.0922078	0.275862	0.0298823	0.0196952
633.984	0.0817225	0.258339	0.0267491	0.0195366
634.466	0.0717636	0.241028	0.0237211	0.0193775
634.948	0.0626105	0.22467	0.0208805	0.0192274
635.43	0.0544104	0.209719	0.0182906	0.0190942
635.912	0.0472248	0.196428	0.0159984	0.0189842
636.394	0.041045	0.184885	0.0140269	0.0189026
636.876	0.0358122	0.17504	0.0123726	0.018854
637.358	0.0314329	0.166765	0.0110082	0.0188427
637.841	0.0277929	0.159876	0.0098893	0.0188728
638.323	0.0247785	0.154174	0.00896915	0.0189449
638.805	0.0222792	0.149452	0.0082024	0.0190543
639.287	0.0201993	0.145519	0.00755387	0.0191896
639.769	0.0184667	0.142216	0.00700018	0.0193352
640.251	0.0170204	0.139405	0.00652512	0.0194735
640.733	0.0158129	0.136989	0.00611775	0.0195928
641.215	0.0148049	0.134901	0.00577025	0.0196907
641.697	0.0139586	0.133093	0.00547659	0.0197738
642.179	0.0132405	0.13153	0.00523436	0.0198555
642.662	0.0126226	0.13018	0.00504415	0.019948
643.144	0.0120839	0.129007	0.00490895	0.020058
643.626	0.0116112	0.127975	0.00482963	0.0201826
644.108	0.0111988	0.127052	0.00480099	0.0203109
644.59	0.0108451	0.126213	0.00480983	0.0204274
645.072	0.0105489	0.125446	0.00483788	0.0205199
645.554	0.0103073	0.124743	0.00486461	0.0205813
646.036	0.0101141	0.124097	0.0048747	0.0206118
646.519	0.00996134	0.123495	0.00486203	0.0206159
647.001	0.00984005	0.122916	0.00483104	0.0205998
647.483	0.00974255	0.122339	0.00479536	0.0205695
647.965	0.00966344	0.12175	0.00477074	0.0205285
648.447	0.00959951	0.121151	0.00477218	0.0204808
648.929	0.00954961	0.120563	0.00480849	0.0204308
649.411	0.00951351	0.120012	0.0048809	0.0203828
649.893	0.0094919	0.119524	0.00498459	0.0203406
650.375	0.00948598	0.119109	0.0051113	0.0203053
650.858	0.00949678	0.118756	0.00525163	0.0202731
651.34	0.00952567	0.118444	0.0053962	0.0202376
651.822	0.00957272	0.118147	0.0055383	0.020192
652.304	0.00963613	0.117853	0.00567474	0.0201341
652.786	0.00971246	0.117566	0.00580749	0.0200672
653.268	0.00979596	0.117306	0.00594385	0.0200013
653.75	0.00988052	0.117098	0.00609456	0.0199483
654.232	0.00995998	0.116954	0.00627094	0.0199177
654.715	0.0100311	0.116872	0.00648079	0.0199125
655.197	0.0100937	0.116827	0.00672382	0.0199276
655.679	0.0101516	0.116785	0.00699143	0.019951
656.161	0.0102113	0.116716	0.00726958	0.0199704
656.643	0.0102813	0.116603	0.00754426	0.0199761
657.125	0.01037	0.116449	0.0078057	0.0199638
657.607	0.0104827	0.116267	0.00805288	0.0199337
658.089	0.0106211	0.11607	0.0082902	0.0198872
658.572	0.0107822	0.115867	0.00852502	0.0198244
659.054	0.010959	0.115657	0.00876223	0.0197429
659.536	0.011141	0.115432	0.00900281	0.0196404
660.018	0.0113178	0.115186	0.0092435	0.0195169
660.5	0.0114815	0.114924	0.00948235	0.0193774
660.982	0.0116278	0.114656	0.00972042	0.0192322
661.464	0.0117562	0.114397	0.00996347	0.0190936
661.946	0.0118689	0.114159	0.0102181	0.0189713
662.428	0.0119689	0.113944	0.010486	0.0188694
662.91	0.01206	0.113743	0.0107598	0.0187845
663.393	0.0121447	0.113542	0.0110239	0.0187089
663.875	0.0122258	0.113328	0.0112585	0.0186335
664.357	0.0123064	0.113093	0.0114496	0.0185527
664.839	0.0123917	0.112835	0.0115968	0.0184656
665.321	0.0124885	0.112556	0.0117165	0.0183759
665.803	0.0126073	0.112253	0.0118453	0.0182876
666.285	0.0127605	0.111927	0.0120379	0.0182025
666.768	0.0129575	0.111575	0.0123608	0.0181158
667.25	0.0131961	0.11121	0.0128591	0.0180166
667.732	0.0134524	0.110867	0.0135122	0.0178927
668.214	0.0136867	0.11059	0.0142104	0.0177424
668.696	0.013867	0.110407	0.01482	0.0175799
669.178	0.0139879	0.110307	0.0152689	0.0174255
669.66	0.0140669	0.110255	0.0155706	0.017292
670.142	0.0141275	0.110212	0.0157837	0.0171806
670.624	0.0141906	0.110148	0.0159714	0.017084
671.107	0.0142704	0.110046	0.0161822	0.0169912
671.589	0.0143743	0.109902	0.0164428	0.0168916
672.071	0.0145047	0.109726	0.0167622	0.0167775
672.553	0.0146594	0.109533	0.017134	0.0166462
673.035	0.014834	0.109341	0.0175434	0.0165003
673.517	0.0150226	0.109164	0.0179735	0.0163467
673.999	0.0152217	0.109003	0.0184118	0.0161928
674.481	0.0154301	0.108853	0.0188541	0.0160432
674.963	0.0156481	0.108703	0.0193026	0.0158996
675.446	0.0158759	0.108546	0.019762	0.015761
675.928	0.0161121	0.108385	0.0202357	0.0156262
676.41	0.0163531	0.108226	0.0207237	0.0154954
676.892	0.0165928	0.108075	0.0212239	0.0153707
677.374	0.0168262	0.107932	0.0217325	0.0152547
677.856	0.0170499	0.107792	0.0222465	0.0151504
678.338	0.017264	0.107641	0.0227641	0.0150595
678.82	0.0174712	0.10747	0.0232858	0.0149834
679.303	0.0176771	0.107278	0.0238149	0.0149246
679.785	0.0178872	0.107077	0.024358	0.0148877
680.267	0.0181056	0.106883	0.0249265	0.0148779
680.749	0.0183352	0.106714	0.0255353	0.0149012
681.231	0.0185759	0.106574	0.0262001	0.0149606
681.713	0.0188253	0.106453	0.0269347	0.0150553
682.195	0.0190805	0.106331	0.0277465	0.0151816
682.677	0.0193379	0.106185	0.028636	0.0153349
683.159	0.019595	0.106	0.0295979	0.0155142
683.642	0.0198507	0.105775	0.030625	0.0157236
684.124	0.0201051	0.105524	0.0317143	0.0159734
684.606	0.0203603	0.105265	0.0328709	0.0162795
685.088	0.0206184	0.105017	0.0341101	0.01666
685.57	0.0208811	0.104787	0.0354541	0.0171324
686.052	0.0211487	0.104572	0.0369309	0.0177151
686.534	0.0214196	0.104364	0.0385709	0.0184303
687.016	0.0216899	0.104157	0.0404048	0.0193058
687.499	0.0219549	0.103951	0.0424707	0.0203849
687.981	0.0222091	0.103751	0.0448173	0.0217293
688.463	0.022449	0.103566	0.0475051	0.0234196
688.945	0.0226727	0.103402	0.0506173	0.0255717
689.427	0.0228818	0.103256	0.0542513	0.0283345
689.909	0.0230792	0.103121	0.0585138	0.0318933
690.391	0.0232697	0.102987	0.0635233	0.0364925
690.873	0.0234585	0.102847	0.0693921	0.042409
691.356	0.0236504	0.102702	0.0762179	0.0499378
691.837	0.0238496	0.102556	0.084072	0.0593704
692.32	0.0240599	0.102414	0.0929753	0.0709205
692.802	0.0242837	0.102277	0.102873	0.0846702
693.284	0.0245223	0.102137	0.113597	0.100485
693.766	0.0247758	0.101981	0.124868	0.117994
694.248	0.0250434	0.101799	0.136262	0.13652
694.73	0.0253215	0.101581	0.147228	0.155077
695.212	0.0256065	0.101331	0.157185	0.172554
695.694	0.0258926	0.101056	0.165544	0.187754
696.177	0.0261742	0.100769	0.171814	0.199624
696.659	0.026446	0.100477	0.175697	0.207477
697.141	0.0267051	0.100184	0.177087	0.211038
697.623	0.0269499	0.0998912	0.176089	0.210485
698.105	0.0271826	0.0995982	0.172959	0.206321
698.587	0.0274069	0.0993101	0.168071	0.199276
699.069	0.0276285	0.0990379	0.161841	0.190134
699.551	0.0278521	0.0987942	0.154661	0.179594
700.034	0.028082	0.0985886	0.146898	0.16827
700.516	0.0283211	0.0984227	0.138847	0.156619
700.998	0.0285713	0.0982876	0.130725	0.144956
701.48	0.0288346	0.0981679	0.122699	0.133514
701.962	0.0291135	0.0980485	0.114879	0.122438
702.444	0.0294114	0.0979205	0.107342	0.111832
702.926	0.0297322	0.0977842	0.100143	0.101775
703.408	0.0300784	0.0976475	0.0933219	0.0923218
703.89	0.0304498	0.0975205	0.0869026	0.0835089
704.373	0.0308421	0.0974104	0.0809018	0.0753559
704.855	0.0312481	0.0973175	0.0753247	0.0678609
705.337	0.0316584	0.0972375	0.0701702	0.0610063
705.819	0.0320641	0.0971658	0.0654332	0.0547631
706.301	0.0324598	0.0971024	0.0611059	0.0490966
706.783	0.0328444	0.097054	0.0571792	0.0439701
707.265	0.0332216	0.0970315	0.0536424	0.0393475
707.747	0.0335988	0.0970443	0.0504822	0.0351949
708.23	0.0339847	0.0970962	0.0476818	0.0314788
708.712	0.0343885	0.0971822	0.0452215	0.0281657
709.194	0.0348166	0.0972928	0.0430813	0.0252235
709.676	0.035274	0.0974181	0.041241	0.0226193
710.158	0.0357625	0.0975533	0.0396821	0.0203221
710.64	0.0362813	0.0977027	0.03839	0.0183052
711.122	0.0368259	0.0978742	0.03735	0.0165449
711.604	0.0373888	0.0980747	0.0365466	0.0150217
712.086	0.0379596	0.098304	0.0359625	0.0137193
712.569	0.0385257	0.0985506	0.0355735	0.0126205
713.051	0.0390744	0.0987945	0.0353509	0.0117059
713.533	0.0395953	0.0990154	0.0352647	0.0109528
714.015	0.0400823	0.0991971	0.0352836	0.0103333
714.497	0.0405346	0.0993341	0.0353825	0.00981795
714.979	0.0409559	0.0994301	0.0355435	0.00937945
715.461	0.0413529	0.0994941	0.0357564	0.00899364
715.943	0.0417328	0.0995321	0.0360179	0.00864499
716.426	0.0421015	0.0995453	0.0363275	0.00832492
716.908	0.0424626	0.0995287	0.0366847	0.00803208
717.39	0.0428181	0.0994762	0.0370871	0.00776906
717.872	0.0431687	0.0993857	0.0375289	0.00754015
718.354	0.0435139	0.0992614	0.0380027	0.0073488
718.836	0.0438532	0.0991131	0.0385007	0.00719593
719.318	0.0441849	0.0989516	0.0390163	0.00707982
719.8	0.0445062	0.0987825	0.039545	0.00699557
720.283	0.0448144	0.0986036	0.040084	0.00693671
720.764	0.0451073	0.0984056	0.0406322	0.00689564
721.247	0.0453848	0.0981769	0.0411895	0.00686504
721.729	0.0456498	0.0979109	0.0417567	0.00683956
722.211	0.0459082	0.0976079	0.0423359	0.00681593
722.693	0.0461673	0.0972758	0.0429298	0.00679415
723.175	0.0464343	0.0969248	0.0435415	0.00677638
723.657	0.0467156	0.096565	0.0441735	0.00676676
724.139	0.0470158	0.0962019	0.0448273	0.00676962
724.621	0.0473387	0.0958389	0.0455038	0.00678897
725.104	0.0476881	0.0954804	0.0462037	0.00682818
725.586	0.0480685	0.0951346	0.0469287	0.00688995
726.068	0.0484843	0.0948147	0.0476819	0.00697671
726.55	0.0489395	0.0945365	0.0484668	0.00709084
727.032	0.0494351	0.0943116	0.0492855	0.00723447
727.514	0.0499689	0.0941428	0.0501364	0.00740835
727.996	0.0505354	0.0940223	0.0510118	0.0076116
728.478	0.051128	0.0939341	0.0519	0.00784126
728.961	0.0517402	0.0938592	0.052786	0.00809335
729.443	0.0523682	0.0937821	0.0536554	0.00836457
729.925	0.0530094	0.0936957	0.0544989	0.00865395
730.407	0.0536623	0.0936	0.0553125	0.00896398
730.889	0.054322	0.0934986	0.0560981	0.00930013
731.371	0.0549807	0.0933934	0.0568599	0.00966808
731.853	0.0556263	0.0932814	0.0576031	0.0100723
732.335	0.0562452	0.0931552	0.0583306	0.010513
732.817	0.0568269	0.0930075	0.059044	0.010987
733.3	0.0573671	0.092835	0.0597435	0.0114881
733.782	0.0578693	0.0926422	0.0604306	0.0120104
734.264	0.0583438	0.0924391	0.0611074	0.0125516
734.746	0.0588069	0.0922398	0.0617778	0.0131131
735.228	0.0592749	0.0920559	0.0624446	0.0136998
735.71	0.0597631	0.0918923	0.0631088	0.0143177
736.192	0.0602837	0.0917496	0.0637696	0.0149725
736.674	0.060847	0.0916249	0.0644246	0.0156682
737.157	0.0614596	0.0915162	0.065071	0.0164066
737.639	0.0621262	0.0914248	0.0657064	0.0171909
738.121	0.0628477	0.0913538	0.0663295	0.0180256
738.603	0.0636194	0.0913058	0.0669387	0.0189186
739.085	0.0644305	0.0912792	0.0675326	0.019881
739.567	0.0652653	0.091267	0.0681095	0.0209239
740.049	0.0661064	0.0912575	0.0686685	0.0220562
740.531	0.0669367	0.0912386	0.0692124	0.0232835
741.013	0.067745	0.0912026	0.0697468	0.0246059
741.496	0.0685259	0.0911479	0.0702813	0.0260186
741.978	0.0692802	0.0910783	0.070826	0.0275111
742.46	0.0700109	0.090999	0.0713868	0.0290687
742.942	0.0707226	0.0909135	0.0719623	0.0306696
743.424	0.0714195	0.0908198	0.0725422	0.0322848
743.906	0.0721056	0.0907124	0.0731086	0.0338811
744.388	0.0727865	0.0905841	0.0736391	0.0354199
744.87	0.07347	0.0904296	0.0741107	0.036863
745.352	0.0741655	0.0902484	0.0745054	0.0381789
745.835	0.0748826	0.0900429	0.0748089	0.0393423
746.317	0.0756277	0.089817	0.0750125	0.0403391
746.799	0.0764038	0.0895728	0.075111	0.0411648
747.281	0.07721	0.089311	0.0751027	0.0418243
747.763	0.0780451	0.0890327	0.0749913	0.0423316
748.245	0.0789101	0.0887414	0.0747867	0.0427086
748.727	0.0798114	0.0884464	0.0745064	0.0429855
749.21	0.0807592	0.0881607	0.0741736	0.0431965
749.692	0.0817655	0.0878984	0.0738125	0.0433763
750.174	0.0828407	0.0876698	0.0734463	0.0435579
750.656	0.0839899	0.0874778	0.0730903	0.0437653
751.138	0.0852118	0.087318	0.0727522	0.0440133
751.62	0.0865009	0.0871806	0.0724339	0.0443069
752.102	0.0878498	0.0870575	0.072134	0.0446429
752.584	0.0892515	0.0869446	0.0718508	0.0450127
753.066	0.0906998	0.0868436	0.0715837	0.0454038
753.548	0.0921887	0.0867584	0.0713318	0.0458024
754.031	0.0937091	0.0866916	0.0710916	0.0461919
754.513	0.0952491	0.0866388	0.0708544	0.0465529
754.995	0.0967955	0.0865903	0.0706082	0.0468656
755.477	0.0983366	0.0865323	0.0703375	0.0471091
755.959	0.0998653	0.0864542	0.0700288	0.0472664
756.441	0.10138	0.086353	0.0696749	0.0473255
756.923	0.102884	0.0862344	0.0692746	0.0472812
757.405	0.104377	0.0861094	0.0688321	0.047133
757.888	0.105852	0.0859866	0.0683523	0.046883
758.37	0.107291	0.0858668	0.0678373	0.0465332
758.852	0.108672	0.0857393	0.067284	0.046084
759.334	0.10997	0.0855855	0.066685	0.045536
759.816	0.11117	0.0853833	0.0660314	0.0448923
760.298	0.112268	0.0851167	0.065317	0.0441611
760.78	0.113275	0.0847805	0.0645415	0.0433567
761.262	0.11421	0.0843802	0.0637102	0.0424988
761.745	0.11509	0.0839286	0.0628327	0.0416083
762.227	0.115929	0.0834403	0.0619198	0.0407037
762.709	0.116732	0.0829268	0.0609814	0.039799
763.191	0.117501	0.082395	0.0600234	0.0389004
763.673	0.118238	0.0818483	0.0590495	0.0380082
764.155	0.118947	0.0812889	0.0580601	0.0371176
764.637	0.119637	0.0807197	0.0570544	0.0362221
765.119	0.120314	0.0801437	0.0560303	0.0353148
765.601	0.120979	0.0795626	0.0549845	0.0343894
766.083	0.121623	0.0789738	0.0539124	0.0334418
766.566	0.122232	0.0783714	0.052808	0.0324692
767.048	0.122791	0.0777459	0.0516646	0.0314704
767.53	0.123294	0.0770906	0.050477	0.0304463
768.012	0.123742	0.0764025	0.0492419	0.0293991
768.494	0.124143	0.0756847	0.047959	0.0283331
768.976	0.124511	0.0749447	0.0466314	0.0272533
769.458	0.124851	0.074191	0.0452658	0.0261666
769.94	0.125162	0.0734296	0.043871	0.0250807
770.423	0.125435	0.0726621	0.0424565	0.0240038
770.905	0.125662	0.0718868	0.041033	0.0229448
771.387	0.125835	0.0711019	0.0396098	0.0219124
771.869	0.125961	0.0703083	0.0381947	0.0209141
772.351	0.126047	0.0695115	0.0367943	0.019956
772.833	0.126106	0.0687201	0.0354131	0.0190411
773.315	0.126143	0.0679434	0.0340544	0.0181701
773.797	0.126156	0.0671888	0.0327218	0.017341
774.279	0.126136	0.0664591	0.0314188	0.0165505
774.762	0.126073	0.0657526	0.0301489	0.0157943
775.244	0.125965	0.0650668	0.0289154	0.0150685
775.726	0.125812	0.0643993	0.0277211	0.0143705
776.208	0.125621	0.0637503	0.0265676	0.0136993
776.69	0.125394	0.0631225	0.0254562	0.0130557
777.172	0.125124	0.0625187	0.0243882	0.0124418
777.654	0.124793	0.0619402	0.0233655	0.0118597
778.136	0.124379	0.0613864	0.0223913	0.0113121
778.619	0.12386	0.0608547	0.0214686	0.0108003
779.101	0.123228	0.0603428	0.0205997	0.010325
779.583	0.122484	0.0598507	0.0197851	0.00988588
780.065	0.121643	0.0593811	0.0190223	0.00948201
780.547	0.120718	0.0589382	0.0183059	0.00911206
781.029	0.119719	0.0585269	0.0176292	0.00877447
781.511	0.118642	0.0581483	0.016985	0.00846703
781.993	0.117476	0.0578006	0.0163667	0.0081867
782.476	0.116211	0.05748	0.0157697	0.00792909
782.958	0.114841	0.0571835	0.0151914	0.0076894
783.44	0.113372	0.0569115	0.0146313	0.00746221
783.922	0.111817	0.0566691	0.0140908	0.00724333
784.404	0.110195	0.056465	0.0135725	0.00703062
784.886	0.108519	0.0563089	0.0130804	0.00682414
785.368	0.106796	0.0562082	0.0126177	0.00662638
785.85	0.105032	0.0561656	0.0121863	0.00644097
786.332	0.10323	0.0561806	0.0117854	0.00627215
786.815	0.101401	0.0562506	0.0114112	0.00612266
787.297	0.0995573	0.056374	0.0110571	0.00599387
787.779	0.0977175	0.0565523	0.010716	0.0058846
788.261	0.0958936	0.0567892	0.0103827	0.00579235
788.743	0.0940904	0.057088	0.0100551	0.00571331
789.225	0.0923028	0.0574484	0.00973645	0.00564295
789.707	0.0905207	0.0578644	0.00943234	0.00557706
790.189	0.0887339	0.0583228	0.00914975	0.00551212
790.672	0.0869375	0.0588056	0.00889349	0.00544585
791.154	0.0851343	0.059294	0.00866351	0.00537768
791.636	0.0833324	0.0597689	0.00845399	0.00530824
792.118	0.0815412	0.0602129	0.00825552	0.00523949
792.6	0.0797666	0.0606112	0.0080573	0.00517302
793.082	0.0780111	0.0609488	0.00785033	0.00511009
793.564	0.0762743	0.0612121	0.00763028	0.00505032
794.046	0.0745561	0.0613905	0.00739861	0.00499243
794.528	0.0728594	0.061477	0.00716167	0.00493418
795.01	0.0711891	0.061471	0.00692917	0.00487396
795.493	0.0695497	0.0613762	0.00670958	0.0048105
795.975	0.0679426	0.0611978	0.00650928	0.00474357
796.457	0.0663634	0.0609391	0.00632988	0.0046733
796.939	0.0648053	0.0605983	0.00616789	0.00459972
797.421	0.063262	0.0601688	0.00601591	0.00452157
797.903	0.0617327	0.0596431	0.00586492	0.00443741
798.385	0.0602244	0.059018	0.0057073	0.00434553
798.867	0.0587506	0.0582985	0.00553883	0.00424597
799.35	0.0573261	0.0574982	0.0053606	0.00414042
799.832	0.0559619	0.0566381	0.00517919	0.00403346
800.314	0.0546614	0.0557404	0.00500466	0.0039304
800.796	0.0534199	0.0548232	0.00484742	0.00383605
801.278	0.052227	0.053898	0.00471553	0.00375309
801.76	0.051071	0.052969	0.00461104	0.00368071
802.242	0.0499435	0.0520378	0.00452997	0.00361619
802.724	0.0488394	0.0511056	0.00446214	0.00355518
803.207	0.0477571	0.0501762	0.00439392	0.00349385
803.689	0.0466954	0.0492566	0.00431297	0.00343036
804.171	0.045652	0.0483543	0.00420843	0.00336507
804.653	0.0446237	0.0474744	0.00407543	0.00329956
805.135	0.0436076	0.0466187	0.00391438	0.00323543
805.617	0.0426028	0.0457846	0.0037307	0.00317355
806.099	0.0416111	0.0449692	0.00353333	0.00311371
806.581	0.0406358	0.0441719	0.00333272	0.00305554
807.063	0.0396799	0.043397	0.00314024	0.00300006
807.545	0.0387436	0.0426532	0.00296619	0.00294965
808.028	0.037824	0.0419509	0.00281793	0.00290851
808.51	0.0369163	0.0412985	0.00269949	0.0028809
808.992	0.0360168	0.0406992	0.00261051	0.00286959
809.474	0.0351245	0.0401496	0.00254621	0.00287469
809.956	0.0342417	0.0396418	0.00249876	0.00289324
810.438	0.0333725	0.039167	0.00245993	0.00292072
810.92	0.03252	0.0387188	0.00242315	0.00295178
811.403	0.0316842	0.038295	0.00238526	0.00298221
811.885	0.0308622	0.0378967	0.00234668	0.00300933
812.367	0.03005	0.0375273	0.00231034	0.00303172
812.849	0.0292469	0.0371872	0.0022779	0.0030474
813.331	0.0284572	0.0368743	0.00224836	0.00305424
813.813	0.0276914	0.0365834	0.00221675	0.00304927
814.295	0.0269629	0.0363086	0.00217436	0.00302995
814.777	0.0262828	0.0360469	0.00211285	0.00299599
815.26	0.0256565	0.0357996	0.00202573	0.00294965
815.742	0.0250805	0.0355736	0.00191196	0.00289671
816.224	0.0245453	0.0353785	0.00177553	0.00284388
816.706	0.024037	0.0352266	0.00162545	0.00279785
817.188	0.0235439	0.0351301	0.00147225	0.00276281
817.67	0.0230593	0.0350997	0.00132606	0.00274016
818.152	0.0225816	0.0351469	0.0011949	0.00272926
818.634	0.0221138	0.0352831	0.00108331	0.00272929
819.116	0.0216589	0.0355196	0.000993433	0.00274136
819.598	0.0212182	0.0358692	0.000924894	0.00276904
820.081	0.0207904	0.0363428	0.00087572	0.0028181
820.563	0.0203732	0.0369504	0.000841658	0.00289374
821.045	0.0199652	0.0377009	0.000816228	0.00299882
821.527	0.0195678	0.038602	0.000791564	0.00313143
822.009	0.0191859	0.0396609	0.0007595	0.00328531
822.491	0.018825	0.0408815	0.00071363	0.00345087
822.973	0.0184892	0.04226	0.000651606	0.00361843
823.455	0.0181788	0.0437769	0.000575754	0.00378027
823.938	0.0178892	0.0453891	0.000492552	0.00393117
824.42	0.0176131	0.0470308	0.000409299	0.00406921
824.902	0.0173415	0.0486099	0.000332462	0.00419321
825.384	0.0170678	0.0500179	0.000264954	0.00430139
825.866	0.0167889	0.0511533	0.00020538	0.00439021
826.348	0.0165047	0.051924	0.000149261	0.00445424
826.83	0.0162165	0.0522677	9.20893e-05	0.00448708
827.312	0.0159254	0.0521587	3.14122e-05	0.00448374
827.794	0.0156314	0.0516071	-3.17744e-05	0.00444186
828.277	0.015333	0.0506572	-9.24673e-05	0.00436337
828.759	0.0150293	0.0493752	-0.000145136	0.00425333
829.241	0.0147207	0.0478492	-0.000183921	0.00412072
829.723	0.0144103	0.0461715	-0.00020631	0.00397584
830.205	0.0141025	0.0444287	-0.000213033	0.0038291
830.687	0.0138032	0.0427028	-0.000207105	0.00369147
831.169	0.0135172	0.0410572	-0.000193327	0.00357205
831.651	0.0132469	0.0395371	-0.000175045	0.00347956
832.134	0.012993	0.038171	-0.00015504	0.00342074
832.616	0.0127539	0.0369697	-0.000133609	0.00340087
833.098	0.0125271	0.03593	-0.000110157	0.00342144
833.58	0.0123101	0.0350384	-8.35891e-05	0.00348052
834.062	0.0121008	0.0342766	-5.27462e-05	0.00357212
834.544	0.0118973	0.0336237	-1.74613e-05	0.00368686
835.026	0.0116989	0.0330592	2.22335e-05	0.00381262
835.508	0.0115044	0.0325662	6.56766e-05	0.00393856
835.99	0.0113135	0.0321297	0.000112206	0.0040551
836.473	0.011126	0.031738	0.000161592	0.00415658
836.955	0.0109423	0.0313836	0.000214264	0.00424206
837.437	0.0107629	0.031062	0.000271552	0.00431404
837.919	0.0105881	0.0307716	0.000335048	0.00437749
838.401	0.010418	0.0305123	0.000405651	0.00443657
838.883	0.0102519	0.0302833	0.000482534	0.00449401
839.365	0.010089	0.0300818	0.000561886	0.00454912
839.847	0.00992842	0.0299021	0.000637071	0.00459858
840.33	0.00977129	0.0297361	0.000698563	0.00463783
840.812	0.00961919	0.029576	0.000737062	0.00466238
841.294	0.00947551	0.0294175	0.000745924	0.00467001
841.776	0.00934366	0.0292603	0.000723089	0.00466037
842.258	0.0092263	0.0291092	0.000672246	0.00463498
842.74	0.0091238	0.0289716	0.000601733	0.00459607
843.222	0.00903478	0.0288542	0.000521744	0.00454474
843.704	0.00895633	0.0287593	0.000440707	0.00448092
844.187	0.00888396	0.0286843	0.000362638	0.00440279
844.669	0.00881369	0.0286204	0.000287002	0.00430878
845.151	0.00874265	0.0285584	0.000209524	0.00419796
845.633	0.00866889	0.0284903	0.000125563	0.00407138
846.115	0.0085921	0.0284119	3.24394e-05	0.00393194
846.597	0.00851262	0.0283245	-6.80851e-05	0.00378378
847.079	0.00843176	0.0282336	-0.000170342	0.00363186
847.561	0.00835093	0.0281455	-0.000266349	0.00348086
848.043	0.00827129	0.0280655	-0.000349324	0.00333432
848.525	0.00819504	0.0279957	-0.000415335	0.00319491
849.008	0.00812414	0.0279353	-0.000464721	0.00306499
849.49	0.0080598	0.0278813	-0.000500665	0.00294598
849.972	0.0080034	0.0278295	-0.000528795	0.00283897
850.454	0.0079551	0.0277759	-0.000554442	0.0027444
850.936	0.00791444	0.0277168	-0.000581643	0.00266131
851.418	0.00787979	0.0276488	-0.000613739	0.00258784
851.9	0.00784888	0.0275687	-0.000653144	0.00252092
852.382	0.0078194	0.0274746	-0.000701246	0.0024581
852.865	0.00778866	0.0273654	-0.000759563	0.00239692
853.347	0.00775409	0.0272421	-0.000827099	0.00233629
853.829	0.00771398	0.0271081	-0.000900841	0.0022762
854.311	0.00766663	0.0269677	-0.000975166	0.00221695
854.793	0.007612	0.0268261	-0.00104293	0.0021589
855.275	0.00755087	0.0266876	-0.00109773	0.00210193
855.757	0.00748523	0.026555	-0.00113574	0.00204594
856.239	0.00741738	0.0264297	-0.00115748	0.00199134
856.721	0.00734977	0.0263119	-0.0011677	0.00193939
857.204	0.00728396	0.0262008	-0.00117384	0.00189266
857.686	0.00722086	0.0260952	-0.00118329	0.00185382
858.168	0.00715955	0.025993	-0.0012012	0.00182441
858.65	0.00709973	0.0258916	-0.00122912	0.00180401
859.132	0.00704076	0.025788	-0.00126477	0.00178951
859.614	0.00698335	0.0256795	-0.00130342	0.0017759
860.096	0.00692944	0.0255649	-0.00133969	0.0017578
860.578	0.00688154	0.0254458	-0.00136893	0.00173179
861.061	0.00684229	0.0253269	-0.00138805	0.00169762
861.543	0.00681337	0.025215	-0.00139608	0.00165831
862.025	0.00679382	0.0251168	-0.00139291	0.00161886
862.507	0.00678133	0.025038	-0.00137996	0.00158464
862.989	0.00677248	0.0249807	-0.00135941	0.00155897
863.471	0.00676386	0.0249432	-0.00133378	0.00154237
863.953	0.00675326	0.0249216	-0.00130663	0.0015325
864.435	0.00674061	0.0249103	-0.00128093	0.00152608
864.918	0.00672782	0.0249053	-0.00125919	0.00152033
865.4	0.00671789	0.0249037	-0.0012425	0.00151398
865.882	0.00671376	0.0249047	-0.00123044	0.00150789
866.364	0.00671675	0.0249083	-0.00122159	0.00150407
866.846	0.00672607	0.0249146	-0.00121432	0.00150447
867.328	0.00673893	0.0249235	-0.00120788	0.00150956
867.81	0.00675148	0.0249342	-0.00120269	0.00151823
868.292	0.00675996	0.0249464	-0.00120028	0.00152784
868.774	0.00676225	0.0249594	-0.00120239	0.00153556
869.256	0.00675888	0.0249731	-0.00120993	0.00153855
869.739	0.00675279	0.024987	-0.00122139	0.00153556
870.221	0.00674832	0.0250005	-0.00123385	0.00152661
870.703	0.00674997	0.0250129	-0.0012423	0.00151268
871.185	0.00676094	0.0250241	-0.00124121	0.00149616
871.667	0.00678194	0.025036	-0.00122625	0.00147963
872.149	0.00681149	0.025052	-0.00119443	0.0014664
872.631	0.00684609	0.0250766	-0.00114582	0.00145965
873.114	0.00688278	0.0251136	-0.00108303	0.00146178
873.596	0.00691897	0.0251628	-0.00101163	0.00147348
874.078	0.00695486	0.0252208	-0.000938534	0.0014939
874.56	0.00699267	0.0252798	-0.000871544	0.0015197
875.042	0.00703608	0.0253308	-0.00081688	0.00154646
875.524	0.00708919	0.0253672	-0.000778217	0.00157001
876.006	0.00715409	0.0253872	-0.000755329	0.00158787
876.488	0.0072308	0.0253957	-0.000743884	0.0016
876.97	0.00731668	0.0254025	-0.000736442	0.00160892
877.452	0.00740764	0.0254183	-0.000725394	0.00161816
877.935	0.00749889	0.0254525	-0.000703925	0.0016315
878.417	0.00758729	0.0255089	-0.000669719	0.00165076
878.899	0.00767193	0.0255861	-0.000624293	0.00167597
879.381	0.00775392	0.0256795	-0.000572179	0.00170601
879.863	0.00783603	0.0257845	-0.000518602	0.00173917
880.345	0.00792119	0.0258981	-0.000467137	0.00177477
880.827	0.0080115	0.0260211	-0.00041848	0.00181313
881.309	0.00810682	0.0261556	-0.000370115	0.00185502
881.792	0.00820534	0.0263037	-0.000318633	0.00190068
882.274	0.00830411	0.0264647	-0.000261515	0.00194894
882.756	0.00840001	0.0266346	-0.000199156	0.00199647
883.238	0.00849059	0.0268067	-0.000135464	0.00203914
883.72	0.00857483	0.026974	-7.6036e-05	0.00207323
884.202	0.00865293	0.027131	-2.66058e-05	0.00209671
884.684	0.00872568	0.0272745	9.31076e-06	0.00211052
885.166	0.00879387	0.0274037	3.1611e-05	0.00211772
885.649	0.00885744	0.0275189	4.33415e-05	0.00212231
886.131	0.00891558	0.0276203	4.89749e-05	0.00212824
886.613	0.00896662	0.0277081	5.32497e-05	0.00213806
887.095	0.0090089	0.0277821	5.89495e-05	0.00215238
887.577	0.00904077	0.0278441	6.78638e-05	0.00217089
888.059	0.00906114	0.0278969	8.06226e-05	0.00219337
888.541	0.00907027	0.027944	9.7657e-05	0.00221988
889.023	0.00906902	0.0279887	0.000119597	0.00225102
889.505	0.00905924	0.0280314	0.000147107	0.00228752
889.987	0.00904307	0.0280699	0.000180287	0.00232966
890.47	0.00902257	0.0280986	0.000217248	0.00237647
890.952	0.00899946	0.0281115	0.000255472	0.00242671
891.434	0.00897379	0.0281048	0.000291412	0.00247926
891.916	0.00894436	0.0280774	0.000322978	0.00253418
892.398	0.00890895	0.0280323	0.000349904	0.00259291
892.88	0.00886424	0.0279745	0.000374576	0.00265801
893.362	0.00880719	0.0279093	0.000401273	0.00273209
893.845	0.00873555	0.0278402	0.000434207	0.00281703
894.327	0.00864932	0.0277686	0.000477028	0.00291362
894.809	0.00855026	0.027694	0.000531132	0.00302124
895.291	0.0084417	0.0276157	0.000596192	0.00313934
895.773	0.00832772	0.0275344	0.000671516	0.00326885
896.255	0.00821233	0.0274524	0.00075711	0.00341249
896.737	0.00809798	0.0273732	0.000854207	0.00357452
897.219	0.00798571	0.0273001	0.000965505	0.00376041
897.701	0.00787503	0.0272349	0.00109397	0.00397487
898.183	0.00776441	0.0271775	0.00124145	0.00422044
898.666	0.00765149	0.0271257	0.00140782	0.00449696
899.148	0.00753455	0.027077	0.00159142	0.00480203
899.63	0.00741253	0.0270282	0.00178881	0.00513094
900.112	0.00728555	0.0269767	0.0019962	0.00547779
900.594	0.0071548	0.0269199	0.00220972	0.00583573
901.076	0.0070219	0.0268551	0.00242584	0.00619807
901.558	0.00688857	0.026779	0.00264018	0.00655711
902.04	0.00675549	0.0266886	0.00284778	0.00690537
902.523	0.00662267	0.0265828	0.00304316	0.00723612
903.005	0.00648822	0.0264618	0.00322018	0.00754295
903.487	0.00634958	0.0263291	0.00337412	0.00782169
903.969	0.00620412	0.0261894	0.00350207	0.00806905
904.451	0.00604961	0.0260477	0.00360276	0.00828223
904.933	0.0058854	0.0259078	0.0036769	0.00845937
905.415	0.00571284	0.0257713	0.00372535	0.00859727
905.897	0.00553497	0.025638	0.00374845	0.00869262
906.38	0.00535604	0.0255066	0.00374514	0.00874181
906.862	0.0051808	0.0253767	0.00371342	0.00874194
907.344	0.00501291	0.0252485	0.0036505	0.00869103
907.826	0.00485503	0.0251231	0.00355505	0.00858916
908.308	0.00470769	0.0250017	0.00342715	0.00843805
908.79	0.00457032	0.0248841	0.00326878	0.00824116
909.272	0.00444099	0.0247692	0.00308381	0.00800292
909.754	0.00431735	0.0246552	0.00287723	0.00772909
910.236	0.00419709	0.0245409	0.00265401	0.00742604
910.719	0.00407874	0.0244278	0.00241925	0.00710047
911.201	0.00396126	0.0243188	0.00217768	0.00675973
911.683	0.00384495	0.0242184	0.00193416	0.00641145
912.165	0.00373037	0.0241301	0.00169327	0.00606298
912.647	0.00361899	0.0240552	0.00145962	0.00572184
913.129	0.00351199	0.0239919	0.00123667	0.00539428
913.611	0.00341049	0.0239364	0.00102618	0.00508545
914.093	0.00331529	0.0238848	0.000828644	0.00479918
914.576	0.00322669	0.0238352	0.000643111	0.00453747
915.058	0.00314528	0.0237887	0.000468403	0.00430102
915.54	0.00307136	0.0237493	0.000304144	0.00408928
916.022	0.00300543	0.0237211	0.000150952	0.00390021
916.504	0.00294771	0.0237072	1.05699e-05	0.00373124
916.986	0.00289767	0.0237077	-0.000114761	0.0035791
917.468	0.00285398	0.0237201	-0.000223498	0.00344122
917.95	0.00281456	0.0237402	-0.000315553	0.00331496
918.433	0.00277614	0.0237649	-0.000391567	0.00319972
918.915	0.00273613	0.0237927	-0.000453633	0.00309572
919.397	0.00269225	0.0238242	-0.000504074	0.00300406
919.879	0.00264358	0.0238609	-0.000544978	0.00292586
920.361	0.00259104	0.0239035	-0.000578566	0.00286112
920.843	0.00253618	0.023951	-0.000607055	0.00280879
921.325	0.00248139	0.0240015	-0.000632797	0.00276621
921.807	0.00242874	0.0240519	-0.00065857	0.00272986
922.289	0.00237977	0.0241011	-0.000686326	0.00269688
922.771	0.00233493	0.0241501	-0.000717025	0.00266525
923.254	0.00229419	0.024201	-0.000750301	0.00263451
923.736	0.00225708	0.0242571	-0.000784105	0.00260541
924.218	0.00222324	0.02432	-0.000815987	0.00257914
924.7	0.00219224	0.0243894	-0.000843833	0.00255665
925.182	0.00216396	0.0244631	-0.000866882	0.00253825
925.664	0.00213779	0.0245391	-0.000885366	0.00252392
926.146	0.00211312	0.0246163	-0.000900841	0.00251349
926.628	0.00208898	0.0246964	-0.000914464	0.00250725
927.111	0.00206438	0.0247824	-0.000926466	0.00250629
927.593	0.00203835	0.0248776	-0.000935657	0.00251208
928.075	0.00201005	0.0249836	-0.000940088	0.00252592
928.557	0.00197929	0.0250995	-0.000937707	0.00254845
929.039	0.00194627	0.025222	-0.000927888	0.00257914
929.521	0.00191123	0.0253474	-0.000910992	0.00261661
930.003	0.00187485	0.0254736	-0.000888838	0.00265901
930.485	0.00183772	0.0256007	-0.000863939	0.00270479
930.967	0.00180085	0.0257312	-0.000838111	0.00275297
931.45	0.00176479	0.0258681	-0.000811952	0.00280369
931.932	0.00173036	0.0260133	-0.000785295	0.00285732
932.414	0.00169819	0.026166	-0.000756983	0.00291485
932.896	0.00166868	0.0263237	-0.000726287	0.0029768
933.378	0.00164211	0.0264833	-0.000692612	0.00304353
933.86	0.00161853	0.0266428	-0.000655658	0.00311541
934.342	0.00159818	0.0268031	-0.000615459	0.00319237
934.824	0.00158105	0.0269668	-0.00057165	0.00327406
935.307	0.00156775	0.0271368	-0.0005236	0.0033599
935.789	0.0015578	0.0273151	-0.000471539	0.00344846
936.271	0.00155059	0.0275002	-0.000415997	0.00353808
936.753	0.00154497	0.0276886	-0.000359058	0.00362631
937.235	0.00153912	0.0278765	-0.000303534	0.00371115
937.717	0.00153127	0.0280605	-0.000252209	0.00379113
938.199	0.00152053	0.0282401	-0.000207237	0.00386544
938.681	0.0015069	0.0284177	-0.000168487	0.00393448
939.163	0.00149134	0.0285972	-0.000134238	0.00399895
939.646	0.00147548	0.0287814	-0.00010214	0.00405944
940.128	0.00146028	0.028972	-6.97416e-05	0.00411651
940.61	0.00144632	0.0291678	-3.66116e-05	0.00416959
941.092	0.00143223	0.0293671	-3.94293e-06	0.0042183
941.574	0.00141624	0.0295672	2.49507e-05	0.0042617
942.056	0.00139609	0.0297663	4.61913e-05	0.00429898
942.538	0.0013703	0.0299631	5.66629e-05	0.004329
943.02	0.00133872	0.0301561	5.48734e-05	0.00435078
943.503	0.00130313	0.0303432	4.13201e-05	0.00436293
943.985	0.00126557	0.0305218	1.80584e-05	0.00436457
944.467	0.00122899	0.0306889	-1.21269e-05	0.0043553
944.949	0.00119516	0.0308431	-4.6087e-05	0.00433602
945.431	0.00116486	0.0309852	-8.15683e-05	0.00430898
945.913	0.00113769	0.0311181	-0.000116318	0.00427749
946.395	0.00111284	0.0312455	-0.000148548	0.00424534
946.877	0.00108945	0.03137	-0.000176569	0.00421566
947.36	0.0010669	0.0314914	-0.000198924	0.00419027
947.842	0.00104528	0.0316057	-0.000215053	0.00416932
948.324	0.00102465	0.0317079	-0.000225054	0.00415166
948.806	0.00100489	0.0317918	-0.000230386	0.00413557
949.288	0.000985696	0.0318536	-0.000232605	0.00411975
949.77	0.000966202	0.0318922	-0.000233631	0.00410406
950.252	0.000946046	0.0319081	-0.00023489	0.00408894
950.734	0.000924894	0.0319021	-0.000236844	0.00407563
951.216	0.000903178	0.0318738	-0.000239493	0.00406493
951.698	0.000881497	0.0318208	-0.000242109	0.00405744
952.181	0.000860382	0.03174	-0.000244295	0.00405306
952.663	0.000839898	0.031629	-0.000245653	0.00405165
953.145	0.000819847	0.031488	-0.000245785	0.00405346
953.627	0.000799431	0.0313204	-0.000243997	0.00405961
954.109	0.000777921	0.0311321	-0.000239129	0.00407162
954.591	0.000755716	0.0309296	-0.000229227	0.00409142
955.073	0.000733478	0.0307177	-0.000212172	0.00412032
955.555	0.000712801	0.0304988	-0.00018561	0.00415926
956.038	0.000694946	0.0302727	-0.000147786	0.00420833
956.52	0.000680941	0.0300381	-9.74694e-05	0.00426742
957.002	0.000670587	0.0297942	-3.39611e-05	0.00433666
957.484	0.000663253	0.0295414	4.27781e-05	0.00441622
957.966	0.000657446	0.0292815	0.000132656	0.00450637
958.448	0.00065217	0.0290168	0.000234056	0.00460668
958.93	0.000646661	0.0287488	0.000344068	0.0047151
959.412	0.000640688	0.0284779	0.000458851	0.004829
959.894	0.000634384	0.0282038	0.000572702	0.0049442
960.377	0.000627847	0.0279269	0.00067968	0.00505635
960.859	0.000620746	0.0276494	0.0007751	0.00516209
961.341	0.000612749	0.0273756	0.0008558	0.00525897
961.823	0.000603392	0.0271108	0.000920843	0.00534561
962.305	0.000592543	0.0268602	0.00097115	0.00542082
962.787	0.000580465	0.026627	0.00100858	0.00548326
963.269	0.000567858	0.0264121	0.00103491	0.00553111
963.751	0.000555649	0.0262151	0.00105116	0.00556186
964.234	0.000544468	0.0260359	0.0010574	0.00557367
964.716	0.000534781	0.0258758	0.00105322	0.00556558
965.198	0.000526255	0.025739	0.0010385	0.00553796
965.68	0.000518957	0.0256308	0.00101396	0.00549296
966.162	0.000512521	0.0255551	0.000980615	0.00543334
966.644	0.000507081	0.0255133	0.000940168	0.00536205
967.126	0.000502868	0.0255024	0.000893848	0.00528168
967.608	0.000500015	0.0255166	0.000842089	0.00519422
968.091	0.000498058	0.0255486	0.000785124	0.00510161
968.573	0.000496433	0.0255931	0.000723289	0.00500634
969.055	0.000493812	0.0256478	0.000657645	0.00491119
969.537	0.000489434	0.0257142	0.000591016	0.00481995
970.019	0.000482866	0.0257944	0.000526886	0.00473627
970.501	0.000474407	0.0258906	0.000469034	0.00466325
970.983	0.000465219	0.0260021	0.000420476	0.004603
971.465	0.000456661	0.0261253	0.00038217	0.00455626
971.947	0.000450094	0.0262557	0.000353751	0.00452314
972.43	0.000446346	0.0263888	0.000333689	0.00450339
972.912	0.000445517	0.026523	0.00032079	0.00449719
973.394	0.000447275	0.0266587	0.000314788	0.0045049
973.876	0.000450691	0.0267985	0.000316711	0.00452676
974.358	0.000455136	0.0269453	0.000328582	0.00456305
974.84	0.000459846	0.0271001	0.000351827	0.00461241
975.322	0.00046429	0.0272625	0.000386581	0.00467273
975.804	0.000468138	0.0274309	0.000431255	0.00474106
976.287	0.000471123	0.0276032	0.00048197	0.00481412
976.769	0.000472915	0.0277782	0.000534317	0.00488867
977.251	0.000473412	0.0279553	0.000583916	0.00496196
977.733	0.000472715	0.0281342	0.000627382	0.00503155
978.215	0.000470825	0.0283139	0.000662689	0.00509497
978.697	0.000467972	0.0284932	0.000689304	0.00515022
979.179	0.000464224	0.0286697	0.000707325	0.00519566
979.661	0.000459547	0.0288419	0.000717646	0.0052304
980.143	0.000454141	0.0290094	0.000721297	0.00525448
980.625	0.000448502	0.0291733	0.000719439	0.00526887
981.108	0.000443626	0.0293353	0.000713265	0.0052746
981.59	0.000441172	0.0294965	0.00070374	0.00527259
982.072	0.000442863	0.0296559	0.000691196	0.00526249
982.554	0.000450459	0.0298107	0.000675167	0.00524311
983.036	0.000464489	0.0299576	0.000654758	0.00521343
983.518	0.000484524	0.0300938	0.000628909	0.00517299
984	0.000509071	0.0302189	0.000597121	0.00512243
984.482	0.000535976	0.0303351	0.000559763	0.00506466
984.965	0.000562948	0.0304465	0.000518559	0.00500416
985.447	0.000588196	0.0305576	0.000476397	0.00494544
985.929	0.000610825	0.0306702	0.000435965	0.00489219
986.411	0.000630767	0.0307833	0.00039978	0.00484652
986.893	0.000648453	0.0308939	0.000369071	0.00480836
987.375	0.00066468	0.0309971	0.000343603	0.00477613
987.857	0.000680111	0.031089	0.000322779	0.00474769
988.339	0.000695112	0.031167	0.000306001	0.00472116
988.822	0.000710411	0.0312306	0.00029307	0.0046957
989.304	0.000726807	0.0312801	0.000284682	0.00467152
989.786	0.000744928	0.0313159	0.000281465	0.00464911
990.268	0.00076554	0.0313377	0.000283687	0.00462909
990.75	0.000788643	0.031345	0.000290981	0.00461201
991.232	0.000813805	0.0313378	0.000302022	0.00459798
991.714	0.000839566	0.0313173	0.000315352	0.0045871
992.196	0.000864366	0.031286	0.000329975	0.00458003
992.678	0.000886544	0.0312463	0.000345626	0.00457712
993.16	0.000905104	0.0312005	0.000363069	0.00457933
993.643	0.00091978	0.031149	0.000383464	0.00458746
994.125	0.000931103	0.0310904	0.000407707	0.00460146
994.607	0.000939604	0.0310226	0.00043623	0.00462159
995.089	0.000946012	0.0309436	0.000468801	0.00464788
995.571	0.000950396	0.0308536	0.000505489	0.00468123
996.053	0.000952587	0.0307542	0.000546757	0.00472357
996.535	0.000952621	0.0306487	0.0005946	0.00477781
997.018	0.000950661	0.0305405	0.000652103	0.00484742
997.5	0.000947772	0.0304318	0.000722758	0.00493565
997.982	0.00094588	0.0303234	0.000809158	0.00504435
998.464	0.000946743	0.0302153	0.00091221	0.00517363
998.946	0.000952322	0.0301076	0.00103	0.00532109
999.428	0.000963612	0.0300013	0.00115845	0.00548209
999.91	0.00098025	0.0298982	0.00129123	0.00564956
1000.39	0.00100087	0.0298005	0.00142096	0.00581414
1000.87	0.00102362	0.0297092	0.00154055	0.00596626
1001.36	0.00104617	0.0296239	0.00164331	0.00609577
1001.84	0.00106643	0.029542	0.0017241	0.00619407
1002.32	0.00108314	0.0294612	0.00178002	0.00625608
1002.8	0.0010956	0.0293796	0.00181024	0.00628036
1003.28	0.00110414	0.0292979	0.00181666	0.0062703
1003.77	0.00110939	0.0292188	0.00180305	0.00623259
1004.25	0.00111234	0.0291466	0.0017756	0.00617686
1004.73	0.00111414	0.0290846	0.0017409	0.00611251
1005.21	0.00111563	0.0290342	0.00170507	0.00604772
1005.7	0.00111732	0.0289943	0.00167341	0.00598849
1006.18	0.00111935	0.0289619	0.00164913	0.00593831
1006.66	0.00112154	0.0289345	0.00163403	0.00589854
1007.14	0.0011238	0.0289103	0.00162844	0.00586982
1007.62	0.00112619	0.0288901	0.0016326	0.00585279
1008.11	0.00112928	0.0288758	0.0016464	0.00584813
1008.59	0.0011341	0.0288694	0.00167008	0.00585676
1009.07	0.00114184	0.0288717	0.00170328	0.00587909
1009.55	0.0011535	0.0288815	0.00174573	0.00591489
1010.03	0.00116945	0.0288968	0.00179609	0.00596306
1010.52	0.00118938	0.0289157	0.00185263	0.00602206
1011	0.00121218	0.0289376	0.00191399	0.0060906
1011.48	0.0012357	0.028964	0.00197953	0.00616802
1011.96	0.00125826	0.0289968	0.00204936	0.00625454
1012.45	0.0012779	0.0290373	0.00212501	0.00635116
1012.93	0.00129339	0.0290858	0.00220822	0.0064596
1013.41	0.00130409	0.0291396	0.00230021	0.00658106
1013.89	0.00130987	0.0291954	0.00240142	0.00671652
1014.37	0.00131117	0.0292502	0.00251122	0.00686639
1014.86	0.00130891	0.0293028	0.00262784	0.00702991
1015.34	0.00130442	0.0293545	0.0027491	0.00720556
1015.82	0.00129944	0.0294087	0.00287296	0.00739082
1016.3	0.00129535	0.029469	0.00299742	0.00758233
1016.78	0.00129349	0.0295386	0.00312138	0.00777638
1017.27	0.00129415	0.0296197	0.00324455	0.00797012
1017.75	0.00129681	0.029713	0.00336731	0.00816219
1018.23	0.0013005	0.0298196	0.00349201	0.00835414
1018.71	0.00130376	0.0299409	0.00362163	0.00854968
1019.2	0.00130562	0.0300783	0.00376045	0.00875475
1019.68	0.00130602	0.030233	0.00391365	0.00897673
1020.16	0.00130595	0.0304044	0.00408597	0.00922248
1020.64	0.00130668	0.0305892	0.00428097	0.00949797
1021.12	0.00130951	0.0307832	0.00450208	0.00980911
1021.61	0.00131503	0.0309818	0.00475134	0.0101611
1022.09	0.0013221	0.0311833	0.00503091	0.01056
1022.57	0.00132922	0.0313894	0.00534323	0.0110117
1023.05	0.0013338	0.031605	0.00569058	0.011521
1023.53	0.00133457	0.031837	0.00607356	0.012088
1024.02	0.00133124	0.0320915	0.00648917	0.0127058
1024.5	0.0013245	0.0323716	0.00692907	0.0133586
1024.98	0.00131698	0.0326776	0.00737765	0.0140204
1025.46	0.00131084	0.0330069	0.00781336	0.0146572
1025.94	0.00130795	0.033357	0.00821219	0.0152339
1026.43	0.00130894	0.0337265	0.00854908	0.0157159
1026.91	0.0013136	0.0341164	0.00880364	0.0160755
1027.39	0.00132081	0.0345296	0.0089629	0.0162959
1027.87	0.00132918	0.034969	0.00902142	0.0163703
1028.36	0.00133763	0.0354369	0.00898123	0.0163018
1028.84	0.0013456	0.0359339	0.0088495	0.0161005
1029.32	0.00135268	0.0364597	0.00863563	0.0157811
1029.8	0.00135866	0.0370145	0.00834931	0.0153594
1030.28	0.00136358	0.037599	0.00799871	0.0148504
1030.77	0.0013674	0.038215	0.00759143	0.0142697
1031.25	0.00137063	0.0388653	0.00713573	0.013632
1031.73	0.00137402	0.0395512	0.00664115	0.0129529
1032.21	0.00137861	0.0402732	0.00612101	0.0122511
1032.69	0.00138539	0.0410308	0.00559025	0.0115453
1033.18	0.00139466	0.0418235	0.005065	0.0108552
1033.66	0.00140623	0.0426523	0.00456091	0.0101993
1034.14	0.00141863	0.0435188	0.00409001	0.00959206
1034.62	0.00143036	0.0444256	0.00366123	0.00904422
1035.11	0.00143987	0.0453728	0.00327917	0.00856216
1035.59	0.00144639	0.0463582	0.00294531	0.00814794
1036.07	0.00145031	0.0473745	0.00265831	0.00780064
1036.55	0.0014526	0.0484113	0.00241538	0.00751702
1037.03	0.0014547	0.0494575	0.00221275	0.00729252
1037.52	0.00145759	0.0505012	0.00204594	0.00712108
1038	0.00146181	0.0515313	0.00191046	0.00699567
1038.48	0.0014667	0.0525369	0.00180192	0.00690924
1038.96	0.00147145	0.0535046	0.00171638	0.0068537
1039.44	0.00147504	0.0544181	0.00165032	0.00682142
1039.93	0.00147641	0.0552594	0.00160104	0.00680556
1040.41	0.00147514	0.0560093	0.00156569	0.00679994
1040.89	0.00147089	0.0566527	0.00154221	0.00680041
1041.37	0.00146378	0.0571803	0.00152838	0.00680402
1041.85	0.0014539	0.0575894	0.00152223	0.00680893
1042.34	0.0014419	0.0578829	0.00152199	0.00681438
1042.82	0.00142847	0.0580664	0.00152595	0.00681987
1043.3	0.00141524	0.0581463	0.0015323	0.00682438
1043.78	0.00140377	0.0581287	0.00153958	0.00682727
1044.27	0.00139556	0.0580203	0.00154656	0.00682758
1044.75	0.00139131	0.05783	0.00155255	0.00682499
1045.23	0.00139084	0.0575698	0.00155777	0.0068199
1045.71	0.00139257	0.0572543	0.00156313	0.00681304
1046.19	0.00139453	0.0569	0.00157027	0.00680583
1046.68	0.00139489	0.056521	0.00158105	0.00679954
1047.16	0.0013925	0.0561287	0.00159708	0.00679526
1047.64	0.00138748	0.055731	0.00161843	0.00679351
1048.12	0.0013807	0.0553331	0.00164484	0.00679466
1048.6	0.00137382	0.0549403	0.00167484	0.0067991
1049.09	0.0013679	0.0545592	0.001707	0.00680738
1049.57	0.00136342	0.0541976	0.00174037	0.00682014
1050.05	0.00136056	0.0538641	0.00177494	0.00683818
1050.53	0.00135837	0.0535653	0.0018112	0.00686171
1051.02	0.0013565	0.0533041	0.00185033	0.00689073
1051.5	0.00135464	0.0530799	0.00189246	0.00692442
1051.98	0.00135308	0.0528901	0.00193719	0.00696193
1052.46	0.00135245	0.0527323	0.00198309	0.00700257
1052.94	0.00135328	0.052607	0.00202816	0.00704615
1053.42	0.00135594	0.0525179	0.0020709	0.00709272
1053.91	0.00136079	0.0524711	0.00211102	0.00714321
1054.39	0.0013679	0.0524729	0.00214951	0.00719825
1054.87	0.00137751	0.0525273	0.00218811	0.00725849
1055.35	0.00138988	0.0526349	0.00222924	0.00732437
1055.84	0.001405	0.0527942	0.00227503	0.00739662
1056.32	0.00142249	0.0530024	0.00232663	0.0074759
1056.8	0.00144047	0.053258	0.00238466	0.00756378
1057.28	0.00145633	0.053561	0.0024491	0.00766184
1057.76	0.00146717	0.0539123	0.00251978	0.00777159
1058.25	0.00147049	0.0543119	0.00259661	0.00789352
1058.73	0.0014651	0.0547573	0.00267981	0.00802746
1059.21	0.00145227	0.0552434	0.00276917	0.00817222
1059.69	0.00143518	0.0557627	0.00286449	0.00832607
1060.17	0.00141813	0.0563089	0.00296549	0.00848835
1060.66	0.0014054	0.0568778	0.00307146	0.00865861
1061.14	0.00139985	0.0574691	0.00318253	0.00883807
1061.62	0.00140241	0.0580841	0.003299	0.00902812
1062.1	0.00141161	0.0587244	0.00342144	0.00922992
1062.59	0.00142435	0.0593892	0.00355057	0.00944392
1063.07	0.00143691	0.0600754	0.00368639	0.00966936
1063.55	0.00144639	0.0607776	0.0038279	0.00990395
1064.03	0.00145091	0.0614907	0.00397377	0.0101455
1064.51	0.00144998	0.0622113	0.00412189	0.010391
1065	0.00144466	0.0629384	0.00427064	0.0106382
1065.48	0.00143631	0.0636715	0.00441853	0.0108843
1065.96	0.00142671	0.0644098	0.00456453	0.0111259
1066.44	0.0014167	0.06515	0.00470719	0.0113587
1066.92	0.00140699	0.0658874	0.00484468	0.0115776
1067.41	0.00139772	0.0666171	0.00497359	0.0117773
1067.89	0.00138855	0.0673363	0.00508967	0.0119525
1068.37	0.0013793	0.0680461	0.00518727	0.0120985
1068.85	0.00136973	0.0687499	0.00526109	0.0122113
1069.34	0.00136033	0.0694524	0.00530576	0.0122871
1069.82	0.00135165	0.0701555	0.0053174	0.012322
1070.3	0.00134454	0.0708581	0.00529399	0.0123132
1070.78	0.00133955	0.0715551	0.00523486	0.0122582
1071.26	0.00133703	0.0722404	0.00514211	0.0121577
1071.75	0.00133669	0.0729095	0.00501904	0.0120148
1072.23	0.00133756	0.0735619	0.00487121	0.0118367
1072.71	0.00133852	0.0741994	0.00470518	0.0116324
1073.19	0.00133836	0.0748252	0.00452793	0.0114123
1073.67	0.00133633	0.0754401	0.0043461	0.0111859
1074.16	0.00133221	0.0760416	0.00416561	0.0109612
1074.64	0.00132623	0.0766244	0.00399002	0.0107432
1075.12	0.00131915	0.0771831	0.00382155	0.0105357
1075.6	0.0013114	0.0777151	0.00366113	0.0103404
1076.09	0.00130336	0.0782225	0.00350898	0.0101591
1076.57	0.00129505	0.0787106	0.00336558	0.00999328
1077.05	0.00128624	0.0791861	0.00323226	0.00984449
1077.53	0.00127677	0.0796525	0.00311054	0.009713
1078.01	0.00126704	0.0801087	0.00300146	0.00959788
1078.49	0.00125757	0.0805499	0.00290505	0.00949668
1078.98	0.00124936	0.0809703	0.00281936	0.00940538
1079.46	0.00124251	0.0813654	0.00274096	0.00931996
1079.94	0.00123706	0.0817358	0.00266571	0.0092369
1080.42	0.00123231	0.082086	0.00259028	0.00915429
1080.91	0.00122703	0.0824222	0.00251279	0.00907139
1081.39	0.00122015	0.0827493	0.00243374	0.00898908
1081.87	0.00121148	0.0830691	0.00235531	0.008908
1082.35	0.00120151	0.0833804	0.0022807	0.00882907
1082.83	0.00119134	0.0836808	0.00221239	0.00875239
1083.32	0.0011826	0.0839692	0.00215165	0.00867795
1083.8	0.00117666	0.0842467	0.0020987	0.00860551
1084.28	0.00117423	0.0845165	0.00205236	0.00853536
1084.76	0.00117523	0.084781	0.00201085	0.00846791
1085.24	0.00117878	0.0850398	0.0019726	0.00840383
1085.73	0.0011836	0.0852893	0.00193609	0.00834343
1086.21	0.00118832	0.0855237	0.00189998	0.00828689
1086.69	0.00119177	0.0857382	0.00186308	0.00823394
1087.17	0.00119337	0.0859319	0.00182428	0.00818434
1087.65	0.00119334	0.0861083	0.00178352	0.00813801
1088.14	0.00119204	0.086274	0.00174127	0.00809555
1088.62	0.00119045	0.0864349	0.00169958	0.00805737
1089.1	0.00118965	0.0865936	0.00166113	0.00802388
1089.58	0.00119091	0.086748	0.00162874	0.00799496
1090.07	0.0011952	0.0868924	0.00160399	0.00796951
1090.55	0.00120274	0.0870213	0.00158657	0.00794565
1091.03	0.00121337	0.0871322	0.00157456	0.00792196
1091.51	0.0012257	0.0872278	0.00156449	0.00789686
1091.99	0.00123836	0.0873138	0.00155252	0.00786973
1092.48	0.00125002	0.0873965	0.00153649	0.00784105
1092.96	0.00125973	0.0874793	0.00151571	0.00781228
1093.44	0.00126743	0.0875604	0.00149117	0.00778448
1093.92	0.00127368	0.0876346	0.00146507	0.00775894
1094.4	0.00127953	0.0876956	0.00143964	0.00773645
1094.89	0.00128601	0.0877387	0.00141614	0.00771695
1095.37	0.00129349	0.0877635	0.00139523	0.00770009
1095.85	0.00130156	0.0877728	0.00137661	0.00768528
1096.33	0.00130941	0.0877697	0.00135979	0.00767169
1096.82	0.00131625	0.087756	0.00134424	0.00765827
1097.3	0.00132131	0.0877297	0.00132971	0.007644
1097.78	0.00132473	0.0876866	0.00131569	0.00762782
1098.26	0.00132659	0.0876226	0.00130163	0.0076088
1098.74	0.00132732	0.0875357	0.00128654	0.00758638
1099.23	0.00132735	0.087427	0.00126966	0.00756055
1099.71	0.00132642	0.0872999	0.00125089	0.00753189
1100.19	0.00132443	0.0871575	0.00123118	0.00750125
1100.67	0.00132117	0.0870011	0.00121244	0.00746963
1101.15	0.00131685	0.0868286	0.00119739	0.00743831
1101.64	0.00131237	0.0866364	0.00118802	0.00740835
1102.12	0.00130884	0.0864219	0.00118526	0.00738078
1102.6	0.00130791	0.0861854	0.00118835	0.00735635
1103.08	0.00131037	0.0859305	0.0011952	0.00733586
1103.57	0.00131662	0.0856621	0.0012033	0.00731941
1104.05	0.00132616	0.0853842	0.00121081	0.00730664
1104.53	0.00133766	0.0850978	0.00121726	0.0072964
1105.01	0.00134952	0.0847998	0.00122331	0.00728743
1105.49	0.00136009	0.0844858	0.00123062	0.0072784
1105.98	0.00136761	0.0841518	0.00124085	0.0072686
1106.46	0.00137113	0.0837974	0.00125478	0.00725815
1106.94	0.00137023	0.0834254	0.00127202	0.00724761
1107.42	0.00136461	0.0830409	0.0012909	0.00723794
1107.9	0.00135504	0.0826471	0.00130947	0.00722921
1108.39	0.00134264	0.0822447	0.00132596	0.00722072
1108.87	0.00132922	0.0818302	0.00133919	0.00721095
1109.35	0.00131629	0.0813985	0.00134859	0.00719758
1109.83	0.00130542	0.0809457	0.00135471	0.00717902
1110.32	0.00129728	0.080471	0.0013576	0.0071546
1110.8	0.00129173	0.0799779	0.00135813	0.00712479
1111.28	0.00128797	0.079472	0.0013565	0.00709111
1111.76	0.00128478	0.0789583	0.00135278	0.00705521
1112.24	0.00128119	0.0784386	0.00134663	0.00701776
1112.72	0.00127717	0.0779109	0.00133769	0.00697863
1113.21	0.00127335	0.0773709	0.00132473	0.00693661
1113.69	0.00127096	0.0768153	0.00130688	0.00689025
1114.17	0.00127112	0.0762435	0.00128302	0.00683865
1114.65	0.00127435	0.0756591	0.00125315	0.0067819
1115.14	0.00128049	0.0750678	0.00121783	0.00672106
1115.62	0.00128841	0.0744759	0.00117925	0.00665797
1116.1	0.00129658	0.0738865	0.00114008	0.00659415
1116.58	0.00130366	0.0732998	0.00110344	0.00653054
1117.07	0.00130894	0.0727137	0.00107158	0.006467
1117.55	0.00131203	0.0721263	0.00104568	0.00640358
1118.03	0.00131333	0.0715378	0.00102558	0.00633966
1118.51	0.0013131	0.0709512	0.00101001	0.00627528
1118.99	0.0013113	0.0703713	0.000997485	0.00621111
1119.47	0.00130771	0.0698025	0.000986858	0.00614786
1119.96	0.00130193	0.0692464	0.000977626	0.00608616
1120.44	0.00129336	0.0687017	0.000970054	0.00602629
1120.92	0.00128236	0.068165	0.00096421	0.0059681
1121.4	0.00126963	0.0676332	0.000959992	0.00591147
1121.89	0.0012565	0.0671062	0.000956539	0.00585676
1122.37	0.00124471	0.0665872	0.000952322	0.00580487
1122.85	0.0012353	0.0660818	0.000945913	0.00575716
1123.33	0.00122896	0.0655954	0.000936516	0.00571489
1123.81	0.00122587	0.0651314	0.00092413	0.0056789
1124.3	0.00122523	0.0646894	0.000909952	0.00564849
1124.78	0.00122643	0.0642663	0.000895475	0.00562224
1125.26	0.00122839	0.063858	0.000882062	0.00559824
1125.74	0.00123022	0.0634615	0.000870209	0.00557437
1126.22	0.00123145	0.0630764	0.000859685	0.00554947
1126.71	0.00123168	0.0627039	0.000849194	0.00552303
1127.19	0.00123058	0.0623453	0.000837408	0.00549531
1127.67	0.00122869	0.0620006	0.000823233	0.00546689
1128.15	0.00122597	0.0616672	0.000806303	0.00543837
1128.63	0.00122317	0.0613412	0.000787282	0.00541029
1129.12	0.00122015	0.0610186	0.000767764	0.00538352
1129.6	0.00121716	0.0606974	0.000749973	0.00535919
1130.08	0.0012141	0.0603789	0.000736764	0.0053394
1130.56	0.00121018	0.0600654	0.000730457	0.00532565
1131.05	0.00120523	0.0597598	0.000733511	0.00531988
1131.53	0.00119895	0.0594618	0.000746853	0.00532176
1132.01	0.00119168	0.0591688	0.000770586	0.00533031
1132.49	0.00118437	0.058875	0.000803116	0.00534256
1132.97	0.00117802	0.0585749	0.000841658	0.0053555
1133.46	0.001174	0.0582643	0.000882792	0.00536661
1133.94	0.0011729	0.0579413	0.000922769	0.00537416
1134.42	0.0011748	0.057607	0.00095893	0.00537838
1134.9	0.00117869	0.057263	0.000989814	0.0053807
1135.38	0.001183	0.0569099	0.00101562	0.00538268
1135.87	0.00118613	0.0565465	0.00103767	0.0053859
1136.35	0.00118609	0.0561703	0.0010581	0.00539103
1136.83	0.00118184	0.0557793	0.00107886	0.00539848
1137.31	0.00117277	0.0553732	0.00110121	0.00540757
1137.8	0.00115912	0.0549541	0.0011256	0.00541854
1138.28	0.00114207	0.0545252	0.00115194	0.00543122
1138.76	0.00112287	0.0540902	0.00117955	0.00544615
1139.24	0.00110364	0.0536497	0.00120736	0.00546323
1139.72	0.00108583	0.0532024	0.001235	0.00548259
1140.21	0.00107092	0.0527446	0.00126228	0.0055039
1140.69	0.00106026	0.0522729	0.0012896	0.00552729
1141.17	0.00105385	0.0517861	0.00131768	0.00555293
1141.65	0.00105126	0.051286	0.00134776	0.00558169
1142.13	0.00105109	0.0507768	0.00138103	0.00561472
1142.62	0.00105205	0.0502629	0.0014183	0.00565258
1143.1	0.00105195	0.0497474	0.00146025	0.00569552
1143.58	0.00104953	0.0492309	0.00150673	0.00574323
1144.06	0.00104372	0.0487113	0.00155747	0.00579436
1144.55	0.00103442	0.0481863	0.00161204	0.00584836
1145.03	0.00102249	0.0476541	0.00167028	0.00590536
1145.51	0.00100891	0.0471154	0.00173298	0.00596689
1145.99	0.000995493	0.0465728	0.00180215	0.0060361
1146.47	0.000984135	0.0460294	0.00188035	0.00611657
1146.96	0.000976098	0.0454874	0.0019708	0.00621195
1147.44	0.000972578	0.0449476	0.00207656	0.00632574
1147.92	0.000973807	0.044409	0.00219956	0.00646007
1148.4	0.000978921	0.0438709	0.00234029	0.00661595
1148.88	0.000986559	0.0433341	0.00249805	0.00679405
1149.37	0.000995061	0.0428009	0.00267021	0.00699314
1149.85	0.0010027	0.0422753	0.00285315	0.00721075
1150.33	0.00100825	0.0417612	0.0030421	0.00744128
1150.81	0.00101137	0.04126	0.00323129	0.00767695
1151.3	0.00101263	0.0407711	0.00341453	0.00790678
1151.78	0.00101263	0.0402916	0.00358472	0.00811816
1152.26	0.0010126	0.0398186	0.00373531	0.00829918
1152.74	0.00101333	0.0393513	0.00386019	0.00843926
1153.22	0.00101522	0.0388916	0.00395447	0.00853144
1153.7	0.00101794	0.0384431	0.0040143	0.00857229
1154.19	0.00102073	0.0380106	0.00403774	0.00856185
1154.67	0.00102293	0.0375965	0.0040245	0.00850309
1155.15	0.00102385	0.0372002	0.00397594	0.00840075
1155.63	0.00102332	0.0368185	0.00389536	0.00826095
1156.12	0.00102173	0.0364476	0.00378832	0.00809187
1156.6	0.0010194	0.0360853	0.00366136	0.00790169
1157.08	0.00101708	0.0357323	0.00352288	0.00769978
1157.56	0.00101502	0.0353926	0.0033812	0.00749501
1158.04	0.00101373	0.0350708	0.00324401	0.00729515
1158.53	0.00101313	0.0347701	0.00311741	0.00710623
1159.01	0.00101369	0.0344906	0.00300509	0.00693227
1159.49	0.00101505	0.0342285	0.00290825	0.00677588
1159.97	0.00101788	0.0339772	0.00282593	0.00663849
1160.45	0.00102213	0.0337319	0.0027568	0.00652115
1160.94	0.00102821	0.0334895	0.00269885	0.0064251
1161.42	0.00103591	0.033251	0.00265171	0.00635119
1161.9	0.00104488	0.0330195	0.00261591	0.00629982
1162.38	0.00105478	0.0327991	0.00259278	0.00626997
1162.87	0.00106428	0.0325919	0.00258331	0.00625941
1163.35	0.00107222	0.0323983	0.00258764	0.00626536
1163.83	0.00107713	0.0322166	0.00260441	0.00628422
1164.31	0.00107793	0.0320451	0.00263098	0.00631333
1164.79	0.00107394	0.0318829	0.00266391	0.00635086
1165.28	0.00106551	0.0317309	0.00269985	0.00639561
1165.76	0.00105358	0.0315907	0.00273653	0.00644629
1166.24	0.00103976	0.0314627	0.00277224	0.00650087
1166.72	0.00102595	0.0313459	0.00280606	0.00655587
1167.2	0.00101373	0.0312373	0.00283737	0.0066072
1167.69	0.00100399	0.0311333	0.00286525	0.00665067
1168.17	0.000996755	0.0310324	0.00288877	0.006683
1168.65	0.000991441	0.0309351	0.00290665	0.00670255
1169.13	0.000987057	0.0308449	0.00291819	0.00670955
1169.62	0.000982906	0.0307672	0.00292333	0.00670558
1170.1	0.000978622	0.0307051	0.00292276	0.00669252
1170.58	0.00097467	0.0306598	0.00291786	0.00667254
1171.06	0.000971582	0.030629	0.00291022	0.00664764
1171.54	0.000969955	0.0306088	0.00290124	0.00662035
1172.03	0.000969623	0.0305952	0.00289207	0.00659361
1172.51	0.000970054	0.0305866	0.0028838	0.00657191
1172.99	0.000970021	0.030583	0.00287736	0.00655987
1173.47	0.000968195	0.0305868	0.00287463	0.00656273
1173.95	0.000963911	0.0306	0.00287803	0.00658483
1174.44	0.000957236	0.030623	0.0028909	0.00662934
1174.92	0.000949167	0.0306556	0.00291682	0.00669838
1175.4	0.000941596	0.0306961	0.00295902	0.00679271
1175.88	0.00093625	0.0307446	0.00301984	0.00691247
1176.37	0.000934457	0.030803	0.00309952	0.00705628
1176.85	0.000936682	0.0308748	0.00319645	0.0072214
1177.33	0.000942094	0.0309631	0.00330651	0.00740242
1177.81	0.000948901	0.0310699	0.00342355	0.00759103
1178.29	0.000954679	0.0311944	0.00353982	0.00777598
1178.78	0.00095717	0.0313334	0.00364756	0.00794528
1179.26	0.000954845	0.0314835	0.00373906	0.00808721
1179.74	0.000946842	0.0316435	0.00380834	0.00819274
1180.22	0.000934092	0.031815	0.003852	0.00825761
1180.7	0.000918353	0.0320025	0.00386861	0.00828108
1181.19	0.000902083	0.0322111	0.00385939	0.00826609
1181.67	0.000887938	0.0324439	0.00382639	0.00821736
1182.15	0.000878144	0.0327006	0.00377351	0.00814055
1182.63	0.000873961	0.0329778	0.00370457	0.0080412
1183.12	0.00087592	0.0332706	0.00362357	0.00792453
1183.6	0.000883025	0.0335755	0.00353444	0.00779649
1184.08	0.000894413	0.0338917	0.00344081	0.00766302
1184.56	0.000908391	0.0342207	0.00334614	0.00753044
1185.04	0.000923831	0.0345649	0.00325349	0.00740484
1185.53	0.000939438	0.0349248	0.003165	0.0072906
1186.01	0.000954248	0.0352983	0.00308237	0.0071904
1186.49	0.000967265	0.0356803	0.00300596	0.00710471
1186.97	0.000977128	0.0360656	0.002936	0.00703294
1187.45	0.000983072	0.0364509	0.00287216	0.00697318
1187.94	0.000984235	0.036836	0.00281416	0.00692355
1188.42	0.000980748	0.0372239	0.00276184	0.00688291
1188.9	0.000973641	0.0376187	0.00271592	0.00685033
1189.38	0.000964376	0.038022	0.00267688	0.00682535
1189.86	0.000954812	0.0384328	0.00264491	0.00680755
1190.35	0.00094671	0.038847	0.00261991	0.00679644
1190.83	0.000940766	0.0392587	0.00260104	0.00679143
1191.31	0.000936748	0.0396643	0.00258701	0.00679257
1191.79	0.000934058	0.0400617	0.00257628	0.00679934
1192.28	0.000931634	0.0404514	0.00256711	0.00681102
1192.76	0.000928679	0.0408344	0.00255805	0.00682626
1193.24	0.000925259	0.0412095	0.00254818	0.00684256
1193.72	0.000922038	0.0415733	0.00253665	0.00685649
1194.2	0.00091978	0.0419204	0.00252342	0.00686545
1194.68	0.000918751	0.0422458	0.00250879	0.00686763
1195.17	0.000918884	0.0425467	0.00249332	0.00686282
1195.65	0.000918884	0.0428245	0.00247833	0.00685289
1196.13	0.000917257	0.0430828	0.00246453	0.00684081
1196.61	0.000912807	0.0433253	0.0024522	0.00682879
1197.1	0.000904772	0.0435537	0.00244091	0.00681822
1197.58	0.000893317	0.0437662	0.00242908	0.00680802
1198.06	0.000879306	0.0439585	0.00241495	0.00679624
1198.54	0.000864266	0.0441265	0.00239692	0.00678009
1199.02	0.000849393	0.0442674	0.00237417	0.00675764
1199.51	0.000835449	0.0443825	0.00234695	0.00672843
1199.99	0.000823034	0.0444753	0.00231734	0.0066937
1200.47	0.000812013	0.0445503	0.00228726	0.00665531
1200.95	0.000802386	0.0446099	0.00225858	0.00661487
1201.43	0.000794452	0.0446535	0.00223187	0.00657305
1201.92	0.000788046	0.0446793	0.00220649	0.00653
1202.4	0.000783564	0.0446846	0.00218055	0.00648466
1202.88	0.000780942	0.0446695	0.00215221	0.00643707
1203.36	0.000779714	0.0446369	0.00212031	0.00638798
1203.85	0.000779515	0.0445914	0.00208479	0.00633865
1204.33	0.000780013	0.0445384	0.0020471	0.00629101
1204.81	0.000781075	0.0444807	0.00200965	0.00624647
1205.29	0.000782768	0.0444191	0.00197443	0.0062055
1205.77	0.000785058	0.0443524	0.00194308	0.00616762
1206.26	0.000787448	0.0442794	0.00191599	0.00613176
1206.74	0.000789606	0.044201	0.00189259	0.00609732
1207.22	0.000790502	0.044121	0.00187203	0.00606409
1207.7	0.000789606	0.0440445	0.00185352	0.00603267
1208.18	0.000786917	0.043976	0.00183672	0.00600374
1208.67	0.000782701	0.0439176	0.00182128	0.00597774
1209.15	0.00077822	0.0438684	0.00180714	0.00595466
1209.63	0.000774669	0.0438259	0.0017937	0.0059335
1210.11	0.000772876	0.0437882	0.00177996	0.00591362
1210.6	0.000772677	0.0437564	0.00176505	0.00589481
1211.08	0.000773274	0.0437344	0.00174792	0.00587771
1211.56	0.000772777	0.0437291	0.00172879	0.00586354
1212.04	0.000769557	0.043746	0.00170827	0.0058533
1212.52	0.000762686	0.0437881	0.00168791	0.00584742
1213.01	0.000752131	0.0438546	0.00166938	0.00584507
1213.49	0.000738987	0.0439424	0.00165408	0.0058448
1213.97	0.000724882	0.0440476	0.00164271	0.0058448
1214.45	0.000711672	0.0441686	0.00163602	0.0058444
1214.93	0.000700355	0.0443058	0.00163386	0.00584369
1215.42	0.000691461	0.0444612	0.00163649	0.00584403
1215.9	0.000684923	0.0446347	0.00164371	0.00584695
1216.38	0.00068051	0.0448232	0.00165528	0.00585343
1216.86	0.000677722	0.0450185	0.00167025	0.00586344
1217.35	0.000676328	0.0452107	0.00168701	0.0058762
1217.83	0.00067593	0.04539	0.00170388	0.00589041
1218.31	0.000676361	0.0455502	0.00171875	0.00590542
1218.79	0.000677158	0.0456894	0.00173085	0.00592151
1219.27	0.00067749	0.0458092	0.00173977	0.00593941
1219.76	0.000676959	0.0459116	0.00174692	0.00595984
1220.24	0.000674802	0.0459964	0.00175381	0.00598272
1220.72	0.000670952	0.0460603	0.00176266	0.00600697
1221.2	0.000665344	0.0460972	0.0017744	0.00602992
1221.68	0.000658508	0.0461018	0.00178974	0.00604947
1222.17	0.000650809	0.0460704	0.00180754	0.00606375
1222.65	0.000642281	0.046003	0.00182661	0.00607272
1223.13	0.000633753	0.0459017	0.00184504	0.00607749
1223.61	0.000625458	0.0457697	0.00186141	0.00607985
1224.09	0.000618224	0.0456094	0.00187469	0.00608152
1224.58	0.000612583	0.0454217	0.00188451	0.00608314
1225.06	0.000608834	0.0452074	0.00189113	0.00608418
1225.54	0.000607075	0.0449693	0.00189509	0.00608351
1226.02	0.000606345	0.0447129	0.00189732	0.00608028
1226.51	0.000605217	0.0444478	0.00189885	0.00607393
1226.99	0.000601966	0.0441845	0.00190101	0.00606563
1227.47	0.000595595	0.0439315	0.00190447	0.00605639
1227.95	0.000585973	0.0436948	0.0019095	0.00604786
1228.43	0.000573996	0.0434761	0.00191619	0.0060411
1228.92	0.000561687	0.0432746	0.00192361	0.0060366
1229.4	0.000551236	0.0430905	0.0019314	0.00603479
1229.88	0.000544734	0.0429256	0.00193905	0.006036
1230.36	0.000543075	0.0427853	0.00194667	0.0060407
1230.84	0.000545663	0.0426757	0.00195519	0.00604961
1231.33	0.00055117	0.0426013	0.00196555	0.00606298
1231.81	0.000557308	0.0425627	0.00197876	0.00608021
1232.29	0.000561886	0.0425555	0.00199487	0.00609964
1232.77	0.000563113	0.0425731	0.00201371	0.0061195
1233.26	0.000560459	0.0426086	0.00203402	0.00613778
1233.74	0.000553923	0.0426578	0.00205406	0.00615357
1234.22	0.000544933	0.0427211	0.002073	0.00616739
1234.7	0.000535146	0.042801	0.00209015	0.00618059
1235.18	0.000526421	0.0429013	0.00210586	0.00619575
1235.66	0.000520616	0.0430229	0.00212081	0.00621444
1236.15	0.000518559	0.0431647	0.00213626	0.00623834
1236.63	0.000520782	0.0433233	0.00215328	0.00626768
1237.11	0.000526554	0.0434967	0.00217276	0.00630295
1237.59	0.000534549	0.0436854	0.00219547	0.00634406
1238.08	0.000543141	0.0438931	0.00222228	0.00639164
1238.56	0.000550805	0.0441247	0.00225428	0.00644615
1239.04	0.000556478	0.0443839	0.00229209	0.00650827
1239.52	0.000560127	0.0446712	0.00233669	0.00657786
1240	0.000562151	0.0449827	0.0023881	0.0066545
1240.49	0.000563379	0.0453126	0.002446	0.00673755
1240.97	0.00056454	0.0456561	0.00250909	0.00682613
1241.45	0.000565668	0.0460115	0.00257554	0.00691981
1241.93	0.00056663	0.0463804	0.00264334	0.00701846
1242.41	0.000566929	0.0467659	0.00271002	0.00712142
1242.9	0.000565834	0.0471696	0.00277334	0.00722706
1243.38	0.000563346	0.0475892	0.00283154	0.00733269
1243.86	0.000559796	0.0480188	0.00288283	0.00743464
1244.34	0.000556113	0.0484511	0.00292696	0.0075296
1244.83	0.000553359	0.0488798	0.00296392	0.007615
1245.31	0.000552431	0.0493034	0.00299465	0.00769047
1245.79	0.00055399	0.0497237	0.00302051	0.00775695
1246.27	0.00055817	0.0501436	0.00304266	0.00781639
1246.75	0.000565137	0.050564	0.00306182	0.00787041
1247.24	0.000574593	0.05098	0.00307813	0.00791906
1247.72	0.000586504	0.0513822	0.00309131	0.00796168
1248.2	0.000599809	0.0517599	0.00310093	0.00799668
1248.68	0.000613579	0.0521042	0.00310717	0.00802311
1249.16	0.000625756	0.0524123	0.0031113	0.00804177
1249.65	0.000634483	0.0526871	0.00311494	0.0080549
1250.13	0.00063747	0.0529354	0.00312065	0.00806648
1250.61	0.000633421	0.0531635	0.00313003	0.00808035
1251.09	0.000622272	0.0533743	0.00314448	0.0080997
1251.58	0.000605449	0.0535662	0.00316353	0.00812613
1252.06	0.000585509	0.0537353	0.0031862	0.00815999
1252.54	0.000565602	0.0538785	0.00321097	0.00820064
1253.02	0.000548682	0.0539959	0.00323644	0.00824728
1253.5	0.000536307	0.0540915	0.00326201	0.00829952
1253.99	0.000529208	0.0541707	0.00328758	0.00835633
1254.47	0.000526421	0.0542383	0.00331389	0.00841646
1254.95	0.000526753	0.0542969	0.0033418	0.00847835
1255.43	0.00052871	0.0543457	0.00337209	0.00853945
1255.91	0.000531464	0.0543846	0.00340591	0.00859734
1256.4	0.000535113	0.0544152	0.00344399	0.00865067
1256.88	0.000540122	0.0544431	0.00348701	0.00869955
1257.36	0.000547355	0.0544762	0.00353491	0.00874478
1257.84	0.000557075	0.0545216	0.00358635	0.00878772
1258.33	0.000569019	0.0545817	0.0036381	0.00882853
1258.81	0.000581759	0.0546529	0.00368469	0.00886559
1259.29	0.000593538	0.0547275	0.00372041	0.00889627
1259.77	0.000602198	0.0547967	0.00373932	0.00891683
1260.25	0.000606279	0.0548571	0.00373829	0.00892491
1260.73	0.000605416	0.054913	0.0037178	0.00891977
1261.22	0.000600539	0.0549758	0.00368211	0.00890313
1261.7	0.000593836	0.0550598	0.0036381	0.00887814
1262.18	0.000587831	0.055176	0.00359293	0.00884774
1262.66	0.000584812	0.05533	0.00355271	0.00881426
1263.15	0.000586205	0.0555203	0.00352037	0.00877866
1263.63	0.000591846	0.0557422	0.00349612	0.00874086
1264.11	0.000599941	0.055992	0.00347799	0.00870127
1264.59	0.00060817	0.0562698	0.00346329	0.00866057
1265.07	0.000614176	0.0565799	0.00345027	0.00862086
1265.56	0.000616698	0.0569288	0.00343831	0.00858456
1266.04	0.000615835	0.0573198	0.00342776	0.00855374
1266.52	0.000613114	0.0577516	0.00341907	0.00852914
1267	0.000610991	0.0582186	0.00341269	0.00851022
1267.48	0.00061192	0.0587134	0.00340758	0.00849559
1267.97	0.000617627	0.0592312	0.00340238	0.00848389
1268.45	0.000628212	0.0597718	0.00339496	0.00847477
1268.93	0.000642746	0.0603393	0.00338388	0.00846866
1269.41	0.000659138	0.060939	0.00336805	0.0084668
1269.9	0.000674868	0.0615725	0.00334624	0.00846964
1270.38	0.000688209	0.0622373	0.00331783	0.008477
1270.86	0.000698198	0.0629264	0.00328214	0.00848741
1271.34	0.000704836	0.0636331	0.00323927	0.00849944
1271.82	0.000708519	0.0643546	0.00319037	0.00851201
1272.31	0.000710644	0.0650958	0.0031385	0.008526
1272.79	0.000711672	0.0658664	0.00308815	0.0085436
1273.27	0.000712303	0.0666763	0.0030443	0.00856766
1273.75	0.000712535	0.0675319	0.00301163	0.00860075
1274.23	0.000711772	0.0684321	0.00299258	0.00864354
1274.72	0.000709482	0.0693697	0.00298701	0.00869481
1275.2	0.000704836	0.0703356	0.00299218	0.00875161
1275.68	0.000697667	0.0713242	0.00300443	0.00881091
1276.16	0.000688076	0.0723357	0.00302004	0.00887043
1276.64	0.000677125	0.0733767	0.00303672	0.00892894
1277.13	0.000666273	0.0744548	0.00305418	0.00898732
1277.61	0.000657346	0.0755745	0.0030728	0.00904618
1278.09	0.00065207	0.0767337	0.00309292	0.00910637
1278.57	0.000651473	0.0779253	0.00311347	0.00916742
1279.06	0.000655455	0.0791404	0.00313173	0.0092282
1279.54	0.000662822	0.0803737	0.00314364	0.0092872
1280.02	0.000671118	0.0816263	0.00314588	0.00934343
1280.5	0.00067822	0.0829044	0.00313673	0.00939634
1280.98	0.000682202	0.084216	0.00311714	0.00944686
1281.47	0.000682534	0.0855659	0.00309058	0.00949597
1281.95	0.000679647	0.0869534	0.00306205	0.0095447
1282.43	0.000675465	0.0883744	0.00303696	0.00959446
1282.91	0.000672147	0.0898253	0.00301981	0.00964643
1283.39	0.000671483	0.0913076	0.00301417	0.0097024
1283.88	0.000674968	0.0928293	0.00302204	0.00976441
1284.36	0.000682799	0.0944021	0.00304453	0.00983459
1284.84	0.000694216	0.0960363	0.00308144	0.00991439
1285.32	0.000708121	0.0977351	0.00313059	0.0100035
1285.81	0.000722658	0.0994932	0.003188	0.0101004
1286.29	0.000736033	0.101299	0.00324708	0.0102017
1286.77	0.000746522	0.103139	0.00329953	0.0103041
1287.25	0.000752396	0.105008	0.00333856	0.0104054
1287.73	0.000752529	0.106909	0.00335876	0.0105052
1288.22	0.000746887	0.10885	0.00335943	0.0106051
1288.7	0.000735867	0.110841	0.0033437	0.0107073
1289.18	0.000721198	0.112887	0.00331836	0.0108144
1289.66	0.000704902	0.114984	0.00329038	0.0109269
1290.14	0.000689038	0.117127	0.00326548	0.0110441
1290.63	0.000675698	0.119308	0.00324655	0.011164
1291.11	0.000666041	0.121527	0.003234	0.0112846
1291.59	0.0006602	0.123791	0.00322685	0.0114048
1292.07	0.000657844	0.12611	0.00322488	0.0115247
1292.56	0.000658541	0.12849	0.00322876	0.0116458
1293.04	0.000661926	0.130931	0.00324141	0.0117699
1293.52	0.000667202	0.133424	0.00326524	0.0118987
1294	0.000673839	0.135956	0.0033013	0.0120327
1294.48	0.000680676	0.138515	0.00334771	0.0121717
1294.97	0.000686019	0.141098	0.00339987	0.0123154
1295.45	0.000688275	0.143707	0.00345187	0.0124633
1295.93	0.000685919	0.146348	0.00349826	0.0126148
1296.41	0.000678883	0.149023	0.00353644	0.0127695
1296.89	0.000667932	0.151726	0.00356657	0.0129269
1297.38	0.000655123	0.154443	0.00359163	0.0130853
1297.86	0.000642978	0.157156	0.00361542	0.013243
1298.34	0.000633554	0.159858	0.00363981	0.0133978
1298.82	0.000627847	0.162549	0.00366507	0.0135473
1299.31	0.000625557	0.165239	0.00368883	0.0136896
1299.79	0.000625623	0.167939	0.00370791	0.0138227
1300.27	0.00062632	0.170656	0.00371937	0.0139449
1300.75	0.000626387	0.17338	0.00372248	0.0140547
1301.23	0.000625358	0.176096	0.003718	0.0141513
1301.71	0.000622969	0.178782	0.00370841	0.0142351
1302.2	0.00061975	0.18143	0.00369645	0.014309
1302.68	0.000615636	0.184039	0.00368428	0.0143768
1303.16	0.000610991	0.186624	0.00367386	0.0144442
1303.64	0.000605449	0.189199	0.00366651	0.0145162
1304.13	0.000599543	0.191769	0.00366427	0.0145967
1304.61	0.000593903	0.194327	0.00366908	0.0146869
1305.09	0.000589424	0.196852	0.00368288	0.0147858
1305.57	0.000586603	0.199325	0.0037059	0.0148906
1306.05	0.000585475	0.201734	0.00373635	0.014998
1306.54	0.00058438	0.204081	0.00377064	0.0151054
1307.02	0.000581759	0.206379	0.0038039	0.0152111
1307.5	0.000575621	0.208646	0.00383264	0.0153144
1307.98	0.000565602	0.210885	0.00385631	0.0154148
1308.46	0.000553194	0.21309	0.00387838	0.0155117
1308.95	0.00054198	0.215244	0.00390532	0.0156044
1309.43	0.000536108	0.217331	0.00394444	0.0156927
1309.91	0.000539492	0.219346	0.00400055	0.0157764
1310.39	0.000553791	0.221302	0.00407409	0.0158564
1310.88	0.000577678	0.223213	0.00415936	0.0159333
1311.36	0.000606943	0.225092	0.00424534	0.0160069
1311.84	0.000635976	0.226935	0.00431875	0.0160755
1312.32	0.000659537	0.22872	0.00436822	0.0161354
1312.8	0.000674204	0.230415	0.00438683	0.0161822
1313.29	0.000679713	0.231995	0.00437532	0.0162128
1313.77	0.000678817	0.233458	0.00434165	0.0162267
1314.25	0.000676561	0.234824	0.00429874	0.0162272
1314.73	0.000677888	0.236126	0.0042606	0.0162198
1315.21	0.000687313	0.237393	0.00423898	0.0162116
1315.7	0.000706794	0.238636	0.00424065	0.0162087
1316.18	0.000736299	0.239838	0.00426565	0.0162139
1316.66	0.000772743	0.240965	0.00430708	0.0162274
1317.14	0.000810685	0.241982	0.00435212	0.0162467
1317.62	0.000843517	0.24287	0.00438599	0.0162678
1318.11	0.000864499	0.243635	0.00439366	0.0162873
1318.59	0.000867985	0.244301	0.00436531	0.0163031
1319.07	0.000851584	0.244895	0.00429891	0.0163147
1319.55	0.000816627	0.245436	0.00420034	0.0163223
1320.04	0.000768163	0.245923	0.00408286	0.0163269
1320.52	0.000713	0.246347	0.00396149	0.0163296
1321	0.000659271	0.246699	0.00385153	0.0163318
1321.48	0.000613147	0.246983	0.00376342	0.0163357
1321.96	0.000577911	0.247219	0.00370136	0.0163438
1322.45	0.000553724	0.247429	0.0036643	0.0163592
1322.93	0.000538165	0.247634	0.00364766	0.0163839
1323.41	0.000527947	0.247834	0.00364586	0.0164182
1323.89	0.000519985	0.248015	0.00365381	0.0164599
1324.38	0.000512488	0.248153	0.00366895	0.0165056
1324.86	0.000505588	0.248235	0.00369037	0.0165508
1325.34	0.000499849	0.248263	0.00371763	0.0165921
1325.82	0.000495935	0.248261	0.00374998	0.0166277
1326.3	0.000494044	0.24826	0.00378491	0.0166575
1326.79	0.000493082	0.248286	0.00381857	0.0166817
1327.27	0.000491722	0.248343	0.00384665	0.0167003
1327.75	0.000489235	0.248418	0.00386557	0.0167118
1328.23	0.000485154	0.248482	0.00387279	0.0167137
1328.71	0.000480146	0.248518	0.00386714	0.0167035
1329.2	0.000475104	0.248521	0.00384846	0.01668
1329.68	0.000470858	0.24851	0.003817	0.0166435
1330.16	0.00046774	0.248511	0.00377335	0.0165964
1330.64	0.000465717	0.248548	0.00371917	0.016542
1331.12	0.000465186	0.248626	0.00365835	0.0164841
1331.61	0.000467043	0.248734	0.00359647	0.0164247
1332.09	0.000473478	0.24885	0.00354205	0.0163659
1332.57	0.000487111	0.248959	0.00350447	0.0163088
1333.05	0.000510166	0.249061	0.00349218	0.0162551
1333.54	0.000544269	0.249176	0.00351249	0.0162078
1334.02	0.000589424	0.249331	0.00357032	0.0161702
1334.5	0.000645102	0.249546	0.00366878	0.0161456
1334.98	0.000710445	0.249822	0.00381045	0.0161366
1335.46	0.000784826	0.250136	0.00399684	0.016144
1335.95	0.000867985	0.250454	0.00422791	0.0161668
1336.43	0.000959229	0.250738	0.0044989	0.0162032
1336.91	0.00105494	0.250963	0.0047974	0.0162506
1337.39	0.00114792	0.25111	0.00509953	0.016306
1337.87	0.00122573	0.25117	0.00536855	0.0163653
1338.36	0.00127402	0.251125	0.00556142	0.0164227
1338.84	0.001279	0.250955	0.00563734	0.0164701
1339.32	0.00123321	0.250642	0.00557155	0.0164984
1339.8	0.00113918	0.25019	0.00536772	0.0165015
1340.29	0.00100994	0.249636	0.00505856	0.0164781
1340.77	0.000864997	0.249047	0.00469664	0.0164339
1341.25	0.000723089	0.248493	0.00433478	0.0163789
1341.73	0.000598979	0.248026	0.00401811	0.0163253
1342.21	0.000500712	0.247662	0.00377412	0.0162842
1342.69	0.000429497	0.247379	0.00361041	0.0162617
1343.18	0.000381739	0.247125	0.00352118	0.0162599
1343.66	0.000351695	0.246843	0.00349048	0.0162756
1344.14	0.000333788	0.246494	0.0034993	0.0163032
1344.62	0.000323343	0.246063	0.00353026	0.0163364
1345.11	0.00031827	0.245565	0.00357165	0.0163706
1345.59	0.000317739	0.245023	0.00361826	0.0164038
1346.07	0.000321619	0.24445	0.00366955	0.0164353
1346.55	0.000329378	0.243835	0.00372622	0.0164645
1347.03	0.000339757	0.243146	0.00378738	0.01649
1347.52	0.000350302	0.242343	0.00384892	0.0165087
1348	0.000358492	0.241407	0.00390395	0.0165167
1348.48	0.000361974	0.240344	0.00394541	0.0165117
1348.96	0.000359719	0.239193	0.00396872	0.016494
1349.44	0.000352358	0.238005	0.00397427	0.0164663
1349.93	0.000342078	0.23682	0.00396758	0.0164332
1350.41	0.000332528	0.235659	0.00395882	0.0163994
1350.89	0.000327421	0.234514	0.00395825	0.0163682
1351.37	0.000329709	0.233366	0.00397534	0.0163411
1351.86	0.00034042	0.232196	0.00401466	0.0163184
1352.34	0.000358062	0.231002	0.00407553	0.0163003
1352.82	0.000378523	0.229796	0.00415153	0.016287
1353.3	0.000396331	0.2286	0.00423302	0.0162795
1353.78	0.000406612	0.227426	0.00430962	0.0162788
1354.27	0.000405684	0.226275	0.00437284	0.0162849
1354.75	0.000393678	0.225139	0.00441819	0.0162963
1355.23	0.000373316	0.224005	0.00444654	0.0163105
1355.71	0.000350235	0.222875	0.00446395	0.0163255
1356.19	0.000330572	0.221769	0.00447975	0.0163403
1356.68	0.000319497	0.220721	0.00450493	0.0163561
1357.16	0.000321221	0.219766	0.00455167	0.0163759
1357.64	0.000338729	0.218929	0.0046321	0.016403
1358.12	0.000374643	0.218211	0.00475791	0.0164403
1358.61	0.000431951	0.217591	0.00493981	0.0164889
1359.09	0.000512853	0.217038	0.0051855	0.0165494
1359.57	0.000617494	0.216517	0.00549568	0.0166204
1360.05	0.000740713	0.215993	0.00585901	0.0167002
1360.53	0.000870939	0.215443	0.00624903	0.016786
1361.02	0.000988784	0.21484	0.00662072	0.016872
1361.5	0.00106933	0.214158	0.00691355	0.0169479
1361.98	0.00109151	0.213379	0.00707023	0.017001
[truncated: 5,472 more rows]
