# Supplementary material for: Ionogel thin films as a compatibilizing pretreatment for electrospray deposition
Source: Royal Society of Chemistry journal article supplement (doi:10.1039/d5lp00359h), 2026-01-01
Supplement: d5lp00359h1.zip [file G data - aligned.xlsx]

## Sheet: Sheet1
Lateral	Height Data	Height Data	Height Data	Height Data	Height Data	Mean	Standard Deviation
µm	nm	nm	nm	nm	nm	nm	nm
	H1	H2	H3	H4	H5	Statistics On Rows of B"Height Data":F"Height Data"	Statistics On Rows of B"Height Data":F"Height Data"
0	-1.02308	-22.7045	-5.10822	-10.8752	-6.27278	-9.19675	8.32691
1.99867	-1.94191	-22.9234	-4.28804	-6.68061	-6.87719	-8.54224	8.28733
3.99734	-2.75147	-21.7928	-2.76038	-3.45467	-6.52189	-7.45624	8.16408
5.996	-3.94976	-22.1363	-0.85367	-5.25006	-6.28443	-7.69485	8.32692
7.99467	-5.16487	-22.3715	-0.36319	-8.93415	-6.69191	-8.70512	8.2613
9.99334	-6.08838	-24.101	-0.53817	-11.8561	-6.19391	-9.75551	8.96238
11.992	-7.07608	-24.9624	-1.20757	-13.9345	-5.49741	-10.5356	9.27426
13.9907	-8.12072	-25.5926	-2.5239	-17.4151	-5.51646	-11.8338	9.49772
15.9893	-8.95363	-26.0661	-4.11999	-20.482	-4.40652	-12.8057	9.94472
17.988	-9.70074	-26.5007	-5.88151	-21.1085	-3.71223	-13.3807	9.9387
19.9867	-10.2324	-27.2184	-7.73073	-20.8657	-2.89488	-13.7884	9.98075
21.9853	-11.492	-27.0896	-9.14407	-20.6507	-1.80393	-14.036	9.92694
23.984	-12.6465	-27.1926	-9.56684	-21.0065	-0.3533	-14.1532	10.3771
25.9827	-14.1783	-27.7072	-9.54315	-22.8173	1.42836	-14.5635	11.4234
27.9813	-15.6185	-27.2535	-9.92409	-24.7436	4.21079	-14.6658	12.6464
29.98	-17.1413	-27.7236	-11.9516	-25.7037	7.62463	-14.9791	14.1616
31.9787	-17.9538	-27.8076	-12.7042	-25.9296	11.5573	-14.5676	15.8259
33.9773	-17.8176	-27.8174	-12.9666	-27.3585	15.8994	-14.0121	17.8814
35.976	-16.99	-27.7576	-12.4264	-28.7402	20.6651	-13.0498	20.0942
37.9747	-15.8929	-26.9046	-12.1889	-29.5598	20.8117	-12.7469	20.1215
39.9734	-15.3162	-26.1375	-11.4506	-30.5078	17.4153	-13.1994	18.7868
41.972	-14.7059	-24.4967	-10.5484	-31.9736	13.4263	-13.6597	17.3008
43.9707	-13.7166	-22.797	-8.12701	-32.8131	10.36	-13.4187	16.2605
45.9694	-12.5284	-20.5308	-5.35204	-33.1977	8.79622	-12.5625	15.7915
47.968	-12.0013	-17.8672	-2.99474	-33.4853	6.94333	-11.881	15.2964
49.9667	-11.2321	-15.3939	1.19263	-34.3579	5.14894	-10.9285	15.6075
51.9654	-10.7103	-12.8098	7.33019	-35.0757	2.93551	-9.66601	16.6155
53.964	-9.5748	-16.3838	13.0497	-35.3972	2.1185	-9.23753	18.4472
55.9627	-8.40398	-21.5913	19.3514	-36.0167	1.55663	-9.0208	21.237
57.9614	-5.3299	-22.881	26.9356	-36.2183	1.93411	-7.11189	24.1872
59.96	0	-20.2019	35.5839	-36.8613	4.23102	-3.44967	27.3472
61.9587	9.4561	-12.7755	41.7182	-37.3615	10.1944	2.24633	29.4432
63.9574	23.6579	-0.15253	49.4033	-37.1275	20.0614	11.1685	32.2399
65.956	43.3512	20.2569	62.4034	-35.9043	33.7253	24.7665	37.2273
67.9547	69.1589	49.9227	82.0707	-32.6257	52.2611	44.1576	44.8805
69.9534	98.2848	90.3802	109.408	-25.371	77.7534	70.091	54.5987
71.952	126.686	140.725	143.215	-12.6998	110.38	101.661	65.2561
73.9507	156.748	198.973	181.622	7.71862	149.47	138.906	75.9486
75.9494	187.274	259.206	215.641	35.97	190.418	177.702	84.2963
77.948	214.489	298.378	240.239	73.7821	226.401	210.658	83.0172
79.9467	227.593	314.393	254.702	120.65	253.46	234.16	70.9917
81.9454	211.001	308.036	263.05	176.013	268.596	245.339	51.8908
83.944	176.838	284.041	266.736	232.858	272.292	246.553	43.3672
85.9427	134.652	250.824	267.438	270.211	272.033	239.031	58.9541
87.9414	95.7071	207.65	262.435	282.665	268.3	223.351	76.8206
89.94	79.508	167.044	254.531	279.554	258.229	207.773	83.6591
91.9387	69.467	135.636	251.4	268.416	244.11	193.806	86.9743
93.9374	64.3429	115.636	254.766	253.088	230.768	183.72	87.9763
95.936	63.919	98.9164	256.218	237.672	219.168	175.179	87.4679
97.9347	69.1268	85.3226	252.783	228.123	208.049	168.681	85.1705
99.9334	80.4927	72.7485	244.243	218.576	196.371	162.486	80.2405
101.932	98.4386	61.6061	231.491	204.727	186.022	156.457	72.7961
103.931	121.707	52.8328	215.473	192.508	178.482	152.201	65.4267
105.929	146.303	45.1857	199.586	179.891	168.583	147.91	60.5711
107.928	163.207	37.8	184.229	170.358	157.976	142.714	59.4718
109.927	150.128	32.1005	168.838	163.72	145.356	132.028	56.6791
111.925	121.845	24.867	155.479	155.241	132.26	117.938	54.0449
113.924	89.4872	19.3382	146.889	147.228	120.787	104.746	53.3042
115.923	60.473	11.8463	138.924	134.646	109.2	91.0178	54.1528
117.921	47.781	4.98232	129.482	119.672	96.7144	79.7263	52.3618
119.92	40.998	0	119.783	106.365	85.9044	70.6102	49.4798
121.919	41.1081	-4.8829	109.129	97.2317	76.2771	63.7726	46.261
123.917	50.6335	-10.9287	94.4488	90.7202	67.5331	58.4814	42.7033
125.916	73.1429	-12.5966	79.8306	81.3334	58.0766	55.9574	39.4124
127.915	112.207	-12.4089	68.3225	70.71	50.1075	57.7876	45.3485
129.913	170.323	-11.1972	61.0046	63.1991	41.0332	64.8727	66.1297
131.912	251.733	-6.8986	52.0684	61.3735	32.9159	78.2384	100.464
133.911	356.298	2.05015	42.8636	66.7834	24.5421	98.5074	146.059
135.909	481.579	16.6677	33.9218	82.768	19.2517	126.838	200.081
137.908	611.867	36.1981	26.8922	106.844	19.5464	160.269	254.843
139.907	712.964	61.5546	20.1226	138.638	26.6216	191.98	295.025
141.905	772.64	104.11	14.1934	175.812	41.9265	221.736	314.184
143.904	809.003	168.255	12.3085	208.732	69.8642	253.632	320.059
145.903	855.034	251.586	17.2091	238.375	113.359	295.113	327.449
147.901	907.953	356.373	32.9054	260.225	178.65	347.221	335.143
149.9	966.448	468.179	62.5558	261.797	268.933	405.583	344.783
151.899	1018.76	589.754	111.764	261.764	385.446	473.498	351.52
153.897	1056.27	727.909	185.519	272.302	528.2	554.04	352.957
155.896	1088.13	890.958	290.426	312.28	662.245	648.808	351.252
157.895	1117.85	1069.06	431.43	394.377	788.812	760.304	341.335
159.893	1151.01	1250.81	612.417	529.281	934.305	895.564	319.096
161.892	1197.84	1443.55	811.733	698.846	1100.03	1050.4	299.717
163.891	1248.67	1643.65	1013.91	886.514	1274.31	1213.41	290.139
165.889	1282.17	1850.48	1234.68	1089.84	1462.5	1383.93	292.816
167.888	1290.51	2065.65	1460.04	1306.38	1651	1554.72	320.456
169.887	1288.28	2274.66	1698.69	1534.81	1831.64	1725.61	367.792
171.885	1292.37	2471.79	1959.48	1782.05	2028.6	1906.86	427.176
173.884	1314.36	2640.14	2235.16	2036.53	2248.52	2094.94	488.161
175.883	1363.69	2764.13	2514.95	2286.03	2479.85	2281.73	540.643
177.881	1410.57	2841.82	2785.95	2539.6	2721.29	2459.84	597.483
179.88	1441.27	2896.2	3049.02	2798.34	2962.7	2629.5	670.549
181.879	1450.93	2951.98	3336.02	3047.8	3209.4	2799.23	768.021
183.877	1444.95	3020.14	3640.75	3300.83	3448.79	2971.09	882.733
185.876	1441.4	3130.96	3952.87	3555.77	3654.44	3147.09	997.918
187.875	1450.85	3260.54	4279.52	3790.48	3825.28	3321.33	1106.18
189.873	1475.96	3386.36	4618.57	3986.39	3929.59	3479.37	1202.07
191.872	1516.96	3526.27	4942.53	4156.19	3969.96	3622.38	1283.61
193.871	1542.94	3679.58	5261.74	4323.62	3969.18	3755.41	1372.8
195.869	1576.51	3830.86	5582.97	4507.76	3953.05	3890.23	1466.93
197.868	1603.81	3973.69	5894.46	4716.3	3924.88	4022.63	1569.04
199.867	1628.7	4129.71	6206.58	4936.36	3900.11	4160.29	1678.33
201.865	1670.95	4267.34	6492.17	5160.99	3872.37	4292.77	1777.81
203.864	1733.9	4381.59	6724.64	5394.45	3834.19	4413.75	1858.8
205.863	1824.95	4495.95	6912.64	5625.66	3769.42	4525.72	1921.87
207.861	1944.67	4631.39	7062.9	5858.85	3678.5	4635.26	1971.38
209.86	2066.63	4778.11	7163.82	6068.52	3581.39	4731.7	2008.12
211.859	2175.02	4906.25	7227.27	6232.89	3470.8	4802.45	2037.97
213.857	2257.02	5030.37	7273.69	6342.52	3351.01	4850.92	2067.91
215.856	2331.04	5165.39	7313.5	6413.44	3249.64	4894.6	2092.19
217.855	2408.4	5314.41	7352.73	6469.98	3201.95	4949.49	2105.45
219.853	2491	5466.07	7373.58	6519.37	3192.78	5008.56	2104.78
221.852	2562.23	5578.62	7397.72	6576.39	3166.37	5056.26	2112.93
223.851	2631.79	5661.92	7422.14	6598.71	3121.96	5087.3	2118.85
225.849	2699.23	5739.51	7446.66	6590.64	3073.17	5109.84	2121.85
227.848	2756.55	5824.68	7481.67	6563.91	3018.54	5129.07	2130.76
229.847	2817.08	5919.75	7524.35	6517.62	2966.05	5148.97	2139.66
231.845	2872.22	6012.99	7563.68	6450.79	2924.23	5164.78	2144.99
233.844	2913.23	6086.67	7596.7	6381.17	2899.22	5175.4	2147.41
235.843	2959.04	6150.25	7639.43	6315.78	2872.65	5187.43	2152.7
237.841	3018.97	6221.59	7689.75	6243.59	2856.88	5206.16	2155.14
239.84	3086.58	6293.2	7717.49	6156.76	2846.86	5220.18	2147.67
241.839	3177.14	6365.05	7730.87	6060.23	2833.42	5233.34	2132.47
243.837	3275.84	6443.38	7742.88	5975.02	2826.99	5252.82	2117.34
245.836	3366.11	6487.62	7732.9	5895.19	2833.63	5263.09	2091.64
247.835	3428.3	6493.72	7709.54	5807.72	2860.91	5260.04	2057.49
249.833	3468.69	6483.31	7666.58	5719.81	2891.78	5246.04	2019.64
251.832	3493.55	6460.53	7608.84	5628.79	2925.39	5223.42	1978.53
253.831	3519.64	6444.48	7530.46	5533	2970.5	5199.62	1929.05
255.829	3560.92	6464.89	7452.13	5439.94	3024.47	5188.47	1880.72
257.828	3611.06	6446.74	7386.56	5354.88	3076.5	5175.15	1829.63
259.827	3679.18	6398.69	7354.58	5275.69	3121.67	5165.96	1782.65
261.825	3762.56	6359.06	7329.2	5177.78	3163.84	5158.49	1737.89
263.824	3840.38	6336.49	7308	5039.94	3187.42	5142.44	1706.12
265.823	3916.08	6325.4	7285.62	4877.72	3197.02	5120.37	1684.4
267.821	4002.5	6324.45	7259.36	4705.04	3201.97	5098.66	1667.72
269.82	4085.34	6328.86	7219.23	4544.77	3196.72	5074.98	1655.17
271.819	4161.63	6365.81	7191.82	4417.57	3163.89	5060.15	1663.19
273.817	4237.71	6431.72	7145.48	4337.54	3119.97	5054.49	1672.76
275.816	4303.48	6495.84	7093.02	4279.99	3085.34	5051.53	1678.88
277.815	4361.74	6560.37	7061.1	4228.67	3063.11	5055	1689.79
279.813	4407.53	6610.19	7042.35	4178.64	3047.27	5057.19	1701.94
281.812	4436.53	6639.35	7049.16	4130.8	3032.78	5057.73	1718.49
283.811	4465.45	6636.14	7051.67	4096.15	3014.77	5052.84	1725.99
285.809	4494.82	6603.43	7071.84	4050.83	3001.48	5044.48	1732.33
287.808	4547.06	6565.14	7107.7	3989.11	2989.05	5039.61	1743.22
289.807	4601.91	6496.98	7161.12	3929.13	2979.88	5033.8	1752.98
291.805	4647.48	6389.72	7194.99	3878.58	2976.44	5017.44	1748.17
293.804	4661.82	6276.05	7207	3827.92	2968.06	4988.17	1740.36
295.803	4663.66	6166.91	7200.9	3773.64	2961.59	4953.34	1729.66
297.801	4671.66	6083.43	7194.73	3711.86	2956.84	4923.7	1725.05
299.8	4685.89	6040.68	7187.74	3662.54	2952.06	4905.78	1725.28
301.799	4711.44	6006.62	7186.2	3624.55	2950.88	4895.94	1725.73
303.797	4736.9	5974.85	7178.02	3595.19	2956.29	4888.25	1721.27
305.796	4766.89	5940.5	7140.8	3581.42	2954.92	4876.91	1705.93
307.795	4803.62	5910.65	7091.57	3569.97	2959	4866.96	1685.58
309.793	4828.23	5890.23	7024.03	3556.89	2974.73	4854.82	1658.13
311.792	4837.41	5887.57	6911.48	3550.07	2990.59	4835.42	1618.06
313.791	4857.59	5872.73	6782.73	3539	3011.65	4812.74	1571.05
315.789	4893.26	5830.33	6659.82	3510.37	3021.72	4783.1	1529.15
317.788	4967.71	5758.9	6557.9	3470.72	3026.87	4756.42	1494.93
319.787	5036.85	5672.24	6481.15	3430.32	3036.02	4731.32	1466.9
321.785	5094.43	5574.19	6420.78	3393.4	3041.56	4704.87	1443.81
323.784	5147.59	5484.46	6353.21	3361.58	3044.73	4678.31	1421.07
325.783	5183.88	5388.21	6282.92	3335.57	3050.55	4648.23	1394.84
327.781	5205.61	5296.79	6218.65	3317.95	3062.4	4620.28	1367.31
329.78	5229.6	5221.78	6167.31	3317.78	3079.61	4603.22	1341.18
331.779	5254.01	5173.02	6132.11	3325.08	3098.16	4596.47	1321.39
333.777	5305.66	5178.05	6117.25	3327.99	3119.13	4609.62	1317.64
335.776	5345.58	5213.9	6133.24	3325.68	3142.06	4632.09	1325.51
337.775	5348.47	5277.82	6155.49	3321.07	3158.2	4652.21	1336.04
339.773	5323.87	5363.95	6170.06	3322.16	3158.63	4667.73	1347.24
341.772	5294.96	5441.87	6175.07	3321.18	3145.41	4675.7	1359.7
343.771	5264.31	5511.51	6182.88	3309.85	3121.25	4677.96	1378.26
345.769	5225.83	5564.97	6185.42	3300.06	3094.61	4674.18	1393.28
347.768	5190.85	5575.36	6163.15	3297.07	3070.85	4659.46	1393.03
349.767	5155.91	5532.08	6118.41	3298.73	3051.65	4631.36	1375.61
351.765	5143	5457.79	6053.17	3304.34	3041.89	4600.04	1346.18
353.764	5127.08	5372.4	5973.13	3311.48	3044.68	4565.76	1307.03
355.763	5095.75	5287.59	5882.9	3323.73	3048.76	4527.75	1262.29
357.761	5066.26	5265.15	5798.73	3332.04	3062.33	4504.9	1227.16
359.76	5044.38	5237.43	5722.01	3338.06	3086.59	4485.69	1191.67
361.759	5003.25	5185.07	5639.87	3347.7	3106.26	4456.43	1149.21
363.757	4944.92	5137.3	5563.87	3361.66	3133.18	4428.18	1103.87
365.756	4888.14	5101.72	5504.26	3360.66	3160.04	4402.96	1068.61
367.755	4816.86	5087.01	5489.91	3348.7	3176.57	4383.81	1052.9
369.753	4745.14	5079.2	5512.77	3343.1	3182.18	4372.48	1050.6
371.752	4670.56	5079.25	5552.78	3349.5	3175.59	4365.54	1055.97
373.751	4600.02	5086.44	5597.53	3351.33	3167.99	4360.66	1067.13
375.75	4524.13	5060.41	5629.47	3342.9	3159.85	4343.35	1072.68
377.748	4453.84	5020.95	5625.12	3336.85	3151.65	4317.68	1065.85
379.747	4395.67	4986.35	5602.95	3338.41	3141.28	4292.93	1054.15
381.746	4340.47	4954.76	5566.73	3328.79	3128.5	4263.85	1042.12
383.744	4302.11	4884.65	5496.56	3307.34	3120.55	4222.24	1014.87
385.743	4269.66	4776.98	5381.41	3288.65	3118.85	4167.11	965.34
387.742	4235.45	4660.51	5263.95	3272.31	3118.36	4110.12	913.162
389.74	4214.95	4541.84	5157.4	3261.46	3119.13	4058.96	863.621
391.739	4187.22	4468.87	5091.03	3259.98	3136.2	4028.66	826.877
393.738	4150.22	4425.73	5045.94	3271.86	3148.55	4008.46	798.844
395.736	4117.14	4374.42	5013.81	3275.95	3159.18	3988.1	776.568
397.735	4094.75	4322.7	4980.18	3266.08	3165.9	3965.92	758.689
399.734	4087.81	4280.88	4949.27	3260.35	3168.85	3949.43	743.779
401.732	4088.07	4234.75	4892.26	3263.31	3156.9	3927.06	722.137
403.731	4103.14	4169.39	4805.28	3272.99	3147.46	3899.65	687.901
405.73	4139.9	4098.75	4708.23	3284.92	3137.1	3873.78	653.297
407.728	4193.57	4029.48	4606.19	3305.82	3130.37	3853.09	619.686
409.727	4249.65	3966.1	4526.58	3337.77	3118.85	3839.79	597.371
411.726	4293.18	3905.63	4457.29	3368.2	3105.26	3825.91	581.414
413.724	4301.36	3869.43	4398.25	3397.99	3088.22	3811.05	566.064
415.723	4296.81	3864.91	4361.5	3434.77	3069.93	3805.58	555.103
417.722	4296.78	3863.42	4320.48	3475.85	3069.57	3805.22	538.556
419.72	4307.3	3844.77	4276.27	3529.49	3088.46	3809.26	516.05
421.719	4350.77	3823.46	4244.74	3617.3	3108.77	3829.01	502.163
423.718	4408.07	3801.38	4249.22	3744.97	3141.02	3868.93	496.253
425.716	4454.3	3775.98	4296.74	3896.86	3174	3919.57	501.298
427.715	4462.8	3747.25	4392.71	4035.96	3204.07	3968.56	515.301
429.714	4449.14	3702.82	4515.6	4102.14	3226.66	3999.27	539.53
431.712	4425.75	3642.59	4697.17	4086.83	3236.31	4017.73	588.268
433.711	4394.13	3568.99	4946.22	3976.67	3230.14	4023.23	675.829
435.71	4365.72	3500.72	5252.38	3756.78	3209.23	4016.97	811.559
437.708	4326.59	3428.05	5605.25	3435.85	3171.88	3993.53	1001.8
439.707	4285.45	3370.18	5974.59	3024.1	3132.38	3957.34	1232.19
441.706	4235.4	3363.41	6268.04	2523.21	3102.73	3898.56	1461.1
443.704	4186.98	3334.84	6459.76	1975.98	3096.63	3810.84	1677.92
445.703	4143.7	3301.33	6548.05	1483.72	3112.44	3717.85	1852.21
447.702	4072.34	3274.58	6531.13	1144.77	3149.33	3634.43	1945.88
449.7	3992.23	3215.11	6409.16	942.778	3191.04	3550.06	1962.71
451.699	3903.41	3146.55	6164.89	767.956	3233.24	3443.21	1930.57
453.698	3840.01	3081.7	5783.2	629.814	3272.75	3321.5	1846.2
455.696	3828.86	3018.78	5257.59	539.643	3309.93	3190.96	1714
457.695	3833.1	2959.24	4600.99	511.742	3334.6	3047.94	1545.22
459.694	3854.82	2910.4	3860.97	564.915	3348.15	2907.85	1368.25
461.692	3877.12	2886.41	3118.56	731.649	3349.43	2792.63	1209.22
463.691	3914.16	2873.94	2449.34	1043.3	3327.87	2721.72	1084.41
465.69	3959.65	2865.82	1965.51	1536.82	3306.56	2726.87	983.743
467.688	3992.23	2873.11	1596.25	2244.52	3297.61	2800.74	926.272
469.687	3976.63	2876.61	1287.45	3183.79	3298.76	2924.65	999.562
471.686	3934.34	2871.81	1033.48	4356.09	3300.15	3099.17	1288.07
473.684	3882.55	2849.62	844.044	5587.02	3298.01	3292.25	1717.85
475.683	3816.58	2816.03	685.04	6721.83	3301.88	3468.27	2174.08
477.682	3756.87	2778.57	555.096	7774.22	3320.17	3636.99	2620.42
479.68	3697.03	2743.9	449.002	8726.83	3323.57	3788.07	3035.42
481.679	3632.23	2725.08	366.148	9571.77	3305.92	3920.23	3408.08
483.678	3564.32	2706.06	322.293	10313.1	3294.54	4040.06	3732.78
485.676	3496.95	2690.5	328.876	10946.1	3292.76	4151.04	4002.48
487.675	3440.73	2682.18	405.439	11469.4	3300.61	4259.67	4210.53
489.674	3441.08	2670.54	581.415	11900	3317.07	4382.02	4356.4
491.672	3470.06	2650.49	891.986	12255.4	3335.46	4520.67	4444.07
493.671	3488.07	2636.96	1374.9	12564.7	3346.53	4682.23	4485.12
495.67	3486.52	2627.2	2065.5	12864	3348.84	4878.41	4500.76
497.668	3470.92	2617.76	2985.5	13180	3354.53	5121.74	4517.11
499.667	3443.27	2601.25	4139.88	13523.6	3369.42	5415.5	4565.23
501.666	3415.82	2581.51	5438.4	13836	3381.3	5730.62	4652.35
503.664	3395.95	2565.05	6628.9	14113	3386.08	6017.79	4786.1
505.663	3406.18	2544.83	7692.09	14307.3	3380.46	6266.17	4925.65
507.662	3399.41	2539.58	8675.49	14439.2	3375.98	6485.93	5070.03
509.66	3356.87	2550.42	9570.57	14540.9	3373.83	6678.51	5224.37
511.659	3304.74	2571.62	10384.5	14655.7	3369.32	6857.16	5394.65
513.658	3263.89	2574.31	11137	14808.9	3364.02	7029.62	5586.92
515.656	3221.24	2561.17	11842.7	15022	3358.45	7201.11	5806.14
517.655	3171.49	2538.37	12513.8	15263.9	3328.36	7363.2	6043.18
519.654	3125.25	2512.68	13156.5	15438.6	3284.7	7503.54	6260.94
521.652	3085.82	2459.97	13704.2	15547.2	3244.69	7608.38	6445.64
523.651	3045.79	2401.85	14136.4	15588.7	3217.12	7677.97	6585.68
525.65	3034.16	2359.97	14440	15561.8	3217.22	7722.64	6663.61
527.648	3034.5	2342.92	14629.4	15449.6	3241.59	7739.6	6678.47
529.647	3038.67	2392.81	14723.9	15224	3274.94	7730.86	6622.23
531.646	3049.41	2543.13	14749.1	14921	3322.11	7716.94	6504.19
533.644	3059.69	2844.75	14716.7	14577.9	3357.1	7711.23	6334.55
535.643	3072.53	3381.71	14658.2	14215.6	3377.69	7741.16	6115.67
537.642	3098.29	4009.5	14626.7	13890.7	3414.65	7807.97	5903.51
539.64	3091.86	4617.95	14643.1	13730.7	3479.31	7912.57	5764.06
541.639	3060.07	5204.02	14626.8	13602.2	3586.2	8015.87	5634.73
543.638	3016.98	5802.46	14550	13563.6	3764.95	8139.61	5508.07
545.636	2966.28	6435.83	14415.3	13630.8	4036.65	8296.98	5383.18
547.635	2931.8	7121.64	14233.6	13835.1	4441.02	8512.63	5261.09
549.634	2893.41	7874.55	14013.5	14164.3	4910.11	8771.18	5167.88
551.632	2856.67	8606.75	13772.9	14507.8	5376.4	9024.1	5102.43
553.631	2821.83	9279.22	13543.7	14803.3	5843.04	9258.23	5054.82
555.63	2795.52	9877.96	13357.6	15042.1	6287.05	9472.06	5025.15
557.628	2754.38	10385.5	13256.8	15222	6663.86	9656.52	5026.53
559.627	2710.13	10810	13223.3	15343.3	6991.88	9815.72	5040.29
561.626	2667.17	11161.5	13224.2	15421	7295.3	9953.83	5054.86
563.624	2631.73	11465.3	13299.7	15486.8	7616.69	10100	5075.96
565.623	2600.18	11773.2	13415.6	15567.1	8003.58	10271.9	5103.35
567.622	2584.1	12143.1	13540.4	15682.7	8447.7	10479.6	5139.92
569.62	2573.07	12591.7	13673.7	15879.8	8907.08	10725.1	5208.41
571.619	2565.71	13123.4	13839.1	16178.7	9404.81	11022.3	5316.65
573.618	2570.23	13717.3	14051.9	16407.6	9931.5	11335.7	5421.7
575.616	2596.83	14386.1	14313.1	16547.6	10486.5	11666	5519.91
577.615	2638.96	15056.7	14597.1	16600	10966.4	11971.8	5611.18
579.614	2686.15	15647.8	14808.4	16561	11350.7	12210.8	5677.67
581.612	2730.55	16148.9	14929.6	16431.5	11641.6	12376.4	5717.89
583.611	2772.6	16546.9	14947.3	16214.3	11845.9	12465.4	5727.28
585.61	2808.14	16835	14865.2	15912	11987.8	12481.6	5705.72
587.608	2796.74	17008.7	14680.3	15549.6	12090.5	12425.2	5671.75
589.607	2748.2	17070	14394.8	15157.4	12168.3	12307.7	5624.94
591.606	2696.09	17036.8	14013.7	14790.6	12228.8	12153.2	5561.23
593.604	2638.5	16904.6	13559.2	14550.8	12301.4	11990.9	5493.66
595.603	2605.78	16701.4	13078.4	14314.8	12398.4	11819.8	5405.36
597.602	2576.25	16417.2	12619.7	14031.2	12462.2	11621.3	5299.17
599.6	2545.85	16090	12255.8	13693.5	12438.7	11404.8	5183.23
601.599	2516.9	15695.2	12015.2	13329.2	12341.3	11179.6	5052.26
603.598	2492.76	15225.8	11851.1	12951.8	12195.7	10943.4	4903.53
605.596	2471.86	14754	11730.9	12605.6	12023.2	10717.1	4758.7
607.595	2451.02	14343.3	11643	12352.6	11844.9	10527	4639.52
609.594	2437.01	14071.6	11619.6	12250.3	11706.6	10417	4569.09
611.592	2441.36	14022.7	11700.1	12312.1	11626.2	10420.5	4563.75
613.591	2460.19	14222	11861.7	12362.3	11556.2	10492.5	4607.87
615.59	2509.39	14310.5	12032.6	12395.3	11515	10552.5	4618.62
617.588	2557.74	14489.3	12194.3	12417.9	11518.8	10635.6	4649.97
619.587	2589.33	14645.9	12346	12398.6	11583.9	10712.8	4683.17
621.586	2596.29	14830.4	12494.1	12297	11653.4	10774.2	4727.08
623.584	2601.64	15038.9	12610.1	12120.3	11735.7	10821.3	4771.63
625.583	2603.45	15304.8	12640.4	11869.3	11824.3	10848.5	4822.99
627.582	2606.21	15629.3	12566.7	11567.3	11914.2	10856.7	4883.53
629.58	2606.99	15980.6	12398.6	11233.6	12018.3	10847.6	4954.29
631.579	2581.1	16310.3	12154.4	10919.3	12130.5	10819.1	5038.12
633.578	2547.18	16628	11857.2	10681.2	12217.9	10786.3	5128.75
635.576	2512.33	16945	11513	10625.8	12259.9	10771.2	5222.84
637.575	2493.03	17280.7	11169.7	10731.3	12286	10792.1	5323.4
639.574	2511.35	17626.2	10929.5	10924.7	12330.2	10864.4	5423.37
641.572	2529.5	17900.9	10756.9	11185.2	12404.1	10955.3	5509.71
643.571	2537.81	18099.4	10587.8	11451.2	12528.5	11040.9	5583.7
645.57	2536.44	18223	10438.2	11694.1	12689.9	11116.3	5643.35
647.568	2543.17	18272.7	10338.9	11878	12778.5	11162.2	5671.18
649.567	2557.22	18256.5	10286.6	11979.1	12780.8	11172	5666.29
651.566	2558.76	18163.5	10268.1	11999.1	12692.3	11136.4	5631.94
653.564	2563.31	17973.1	10210.8	11933	12521.2	11040.3	5558.8
655.563	2569.51	17633.8	10129	11778.9	12301.8	10882.6	5433.02
657.562	2588.99	17088.7	10036.5	11525.9	12072.5	10662.5	5234.57
659.56	2598.08	16312.2	9957.24	11178.5	11847.5	10378.7	4967.87
661.559	2601.38	15254.1	9908.88	10764.5	11660.4	10037.8	4628.38
663.558	2600.72	13929.6	9916.93	10318	11552.9	9663.62	4246.9
665.556	2598.42	12385.6	10011.9	9903.98	11551.6	9290.29	3884.99
667.555	2592.63	10728.8	10213.3	9633.28	11740	8981.61	3654.53
669.554	2617.06	9066.64	10447.7	9611.72	11925.1	8733.64	3585.3
671.552	2632.32	7388.58	10701.2	9487.67	12104.9	8462.95	3690.34
673.551	2644.13	5891.04	10923.4	9471.22	12247	8235.36	3924.41
675.55	2662.13	4992.05	11083.2	9446.61	12349.4	8106.67	4123.1
677.548	2669.4	4371.83	11183.7	9505.17	12399	8025.81	4281.58
679.547	2637.4	3813.03	11249.2	9568.01	12412.2	7935.96	4437.09
681.546	2584.36	3654.06	11314	9627.28	12412	7918.34	4507.76
683.544	2519.87	3597.22	11412.5	9673.84	12423.8	7925.43	4566.31
685.543	2458.02	3911.66	11559.2	9711.05	12483.4	8024.66	4558.55
687.542	2434.1	4429.27	11801.6	9740.87	12637.3	8208.62	4541.44
689.54	2447.39	5289.68	12096.7	9733.26	12978.1	8509.02	4512.48
691.539	2477.25	6235.78	12352.3	9665.02	13503.7	8846.82	4528.62
693.538	2524.57	7193.32	12581.8	9559.44	14018.9	9175.6	4565.43
695.536	2593.45	8108.45	12796.6	9446.82	14471.2	9483.3	4615.69
697.535	2661.35	8967.85	13001.9	9354.62	14864.1	9769.96	4683.59
699.534	2739.59	9758.49	13119	9319	15192.7	10025.8	4741.43
701.532	2819.01	10472.6	13129.7	9409.67	15451.5	10256.5	4778.16
703.531	2843.94	11125.8	13035.9	9588.27	15613.3	10441.4	4806.17
705.53	2800.11	11727.3	12836.6	9837.78	15647.1	10569.8	4825.99
707.528	2690.74	12273.4	12537.8	10107.5	15554.2	10632.7	4844.92
709.527	2529.83	12772	12149.6	10335.4	15349	10627.2	4869.95
711.526	2322.13	13226.5	11704.3	10507.3	15046.9	10561.4	4909.6
713.524	2087.77	13609.1	11260.5	10604.4	14638	10440	4952.93
715.523	1852.38	13901.5	10892.8	10614.1	14119.9	10276.1	4984.27
717.522	1679.34	14098.4	10663.9	10546.5	13533.2	10104.3	4979.92
719.52	1632.75	14188.4	10492.4	10415.7	12932.4	9932.34	4912.87
721.519	1793.9	14161.3	10315.9	10230.6	12255.4	9751.42	4732.54
723.518	2192.04	14011.6	10115.5	10029.1	11388.9	9547.45	4415.22
725.516	2766.71	13735.8	9880.55	9844.89	10364.9	9318.57	4003.95
727.515	3520.07	13324.8	9631.11	9720.56	9199.82	9079.28	3523.49
729.514	4306.52	12793.2	9398.54	9701.21	7981.85	8836.26	3080.98
731.512	5093.55	12188.3	9191.84	9757.59	6800.36	8606.33	2743.16
733.511	5878.92	11581.6	8976.7	9828.41	5894.73	8432.07	2506.12
735.51	6671.7	11045.8	8739.25	9924.56	5566.15	8389.49	2261.45
737.508	7475.94	10700.1	8493.56	10041.7	5113.83	8365.02	2215.9
739.507	8317.62	10478.7	8241.2	10190.4	4386.55	8322.9	2430.87
741.506	9203.86	10321.9	7997.94	10371.2	3828.53	8344.68	2705.09
743.504	10106.4	10168.3	7786.91	10491.9	3734.77	8457.65	2852.11
745.503	10888.8	9998.15	7645.28	10523.2	3452.84	8501.66	3092.28
747.502	11463.4	9795.68	7553.74	10442.2	3229.75	8496.94	3275.03
749.5	11901.2	9562.85	7480.69	10238.4	3485.8	8533.77	3236.32
751.499	12217.9	9284.51	7408.98	9906.91	3805.28	8524.72	3148.23
753.498	12424.1	8971.21	7338.88	9440.4	4321.94	8499.31	2971.09
755.496	12544	8636.04	7269.79	8848.44	5283.25	8516.3	2662.39
757.495	12615.8	8322.02	7162.84	8144.43	6331.59	8515.34	2428.32
759.494	12683.1	8063.78	7014.63	7369.7	7426.56	8511.56	2362.42
761.492	12740.8	7853.76	6834.76	6631.57	8434.26	8499.02	2483.45
763.491	12813.8	7778.38	6644.45	6038.16	9337.38	8522.44	2707.96
765.49	12801.7	7899.9	6456.39	5561.66	10178.5	8579.62	2935.14
767.488	12696.2	8145.83	6276.9	5275.4	10955.3	8669.94	3120.83
769.487	12513.6	8418.56	6104.83	5210.73	11694.8	8788.5	3258.16
771.486	12264.1	8706.52	5927.63	5426.88	12410.4	8947.1	3337.8
773.484	11950.4	8982.79	5756.26	5683.41	13120.9	9098.76	3433.66
775.483	11594	9229.37	5613.21	5987.27	13782	9241.15	3532.15
777.482	11245.6	9425.5	5524.69	6280	14310.2	9357.21	3614.58
779.48	10978.8	9558.3	5497.41	6562.51	14727.1	9464.83	3679.54
781.479	10905.9	9619.58	5500.56	6825.82	15038.9	9578.15	3734.53
783.478	11131	9597.38	5537.37	7074.68	15240.9	9716.27	3774.21
785.476	11356.8	9496.84	5618.9	7289.41	15341.6	9820.72	3775.18
787.475	11565.8	9326.13	5743.37	7433.36	15335.9	9880.91	3742.1
789.474	11761.8	9077.84	5889.61	7487.73	15225.7	9888.53	3688.05
791.472	11935.2	8746.69	6041.08	7454.32	14992.9	9834.05	3614.59
793.471	12057.6	8357.14	6193.73	7366.44	14600.8	9715.16	3504.22
795.47	12137.2	7932.16	6328.9	7237.18	14052.9	9537.67	3365.67
797.468	12193.9	7463.04	6431.5	7081.76	13371.3	9308.29	3219.98
799.467	12241.5	6934.45	6495.47	6916.89	12619.1	9041.48	3101.41
801.466	12275.4	6363.12	6522.32	6789.86	11928.1	8775.76	3042.5
803.464	12299.4	5785.92	6520.5	6712.24	11425.1	8548.62	3060.23
805.463	12349.7	5268.11	6509.63	6685.73	10998.3	8362.29	3109.06
807.462	12381.2	4892.57	6504.3	6664.1	10569.4	8202.31	3133.28
809.46	12361.3	4741.15	6518.12	6647.56	10116	8076.81	3086.81
811.459	12301.3	4866.45	6565.82	6643.96	9708.47	8017.2	2963.67
813.458	12200.4	5068.6	6645.26	6629.88	9393.5	7987.53	2823.57
815.456	12073.1	5318.1	6756.12	6615.39	9172.14	7986.97	2674.88
817.455	11901.8	5596.59	6895.05	6598.87	8976.82	7993.83	2506.91
819.454	11688.8	5904.26	7021.98	6595.17	8822.27	8006.49	2324.06
821.452	11451.8	6246.87	7129.26	6623.65	8737.78	8037.87	2131.78
823.451	11236.1	6614.29	7213.34	6715.79	8684.06	8092.72	1942.01
825.45	11124.4	7000.35	7266.1	6887.94	8626.87	8181.13	1786.43
827.448	11167.5	7385.79	7287.73	7104.15	8569.76	8302.98	1701.89
829.447	11391.3	7771.75	7290.37	7303.05	8500.43	8451.38	1715.67
831.446	11711.4	8159.32	7294.38	7456.89	8427.62	8609.93	1796.92
833.444	11988.2	8545.68	7324.85	7541.89	8353.11	8750.76	1882.56
835.443	12207.4	8940.58	7412.51	7556.47	8242.8	8871.95	1961.26
837.442	12371.2	9340.57	7564.18	7507.74	8105.29	8977.8	2035.17
839.44	12469.1	9744.18	7799.11	7412.82	7947.71	9074.58	2099.34
841.439	12486.7	10144.1	8130.09	7299.38	7784.82	9169.03	2147.61
843.438	12449.7	10527.8	8513.92	7197.28	7614.75	9260.69	2196.59
845.436	12365.8	10910.5	8915.75	7150.98	7450.4	9358.69	2245.14
847.435	12229.9	11305.7	9329.82	7243.4	7280.3	9477.82	2278.08
849.434	12078.8	11698.7	9723.44	7460.32	7125.11	9617.28	2305.76
851.432	11906.8	12084.2	10053.1	7671.4	7013.31	9745.75	2345.31
853.431	11664	12476.1	10295.2	7870.48	6955.14	9852.18	2381.38
855.43	11351.7	12892.9	10417.6	8059.75	6973.48	9939.09	2412.27
857.428	10982.5	13336.7	10436.4	8206.76	7028.21	9998.12	2466.62
859.427	10615.4	13707.8	10343.4	8288.23	7079.04	10006.8	2535.06
861.426	10307.4	14002.2	10126.5	8298.29	7103.86	9967.66	2617.55
863.424	10026.3	14217.3	9800.36	8239.48	7128.98	9882.47	2697.17
865.423	9798.93	14349.8	9376.24	8113.29	7163.84	9760.42	2768.87
867.422	9650.1	14390.8	8890.61	7921.99	7251.98	9621.11	2818.89
869.42	9618.19	14325.4	8419.95	7667.71	7393.23	9484.89	2839.87
871.419	9720.93	14165.4	8058.43	7354.96	7580.73	9376.09	2832.89
873.418	9980.03	13938.7	7957.71	6990.55	7736.51	9320.7	2808.82
875.416	10359.1	13648.4	8256.8	6576.34	7874.86	9343.11	2764.01
877.415	10799.4	13350.5	8341.12	6094.72	8010.12	9319.18	2806.69
879.414	11235.4	13130.3	8290.87	5584.9	8160.16	9280.34	2938.32
881.412	11601.2	12914.5	8420.93	5114.15	8351.09	9280.38	3064.02
883.411	11882.4	12668.5	8301.03	4705.45	8592.64	9230.01	3185.88
885.41	12072.4	12428.6	8145.71	4433.39	8827.05	9181.45	3265.14
887.408	12163	12208.5	8059.81	4393.96	9023.39	9169.74	3250.2
889.407	12157.6	12035	7828.37	4431.53	9171.19	9124.75	3216.26
891.406	12082	11962.8	7689.65	4522.77	9249.4	9101.32	3164.26
893.404	11983.8	11896	7464.63	4699.22	9256.05	9059.92	3089.95
895.403	11873.7	11806.7	7306.62	4989.86	9186.15	9032.6	2962.83
897.402	11803.1	11691.6	7156.31	5423.5	9050.17	9024.92	2796.95
899.4	11814.6	11558.8	7027.78	5945.62	8859.81	9041.32	2631.52
901.399	11988.5	11419.4	6950.17	6455.74	8629.08	9088.59	2527.76
903.398	12228.6	11277.1	6901.7	6927.45	8397.29	9146.43	2478.08
905.396	12494.4	11145.9	6884.42	7332.22	8243.74	9220.14	2469.96
907.395	12785	11042.8	6891.72	7671.32	8190.88	9316.34	2493.18
909.394	13101.5	10926	6895.32	7938.99	8188.73	9410.1	2544.81
911.392	13434.8	10733.1	6881.55	8140.26	8211.28	9480.2	2615.68
913.391	13790.8	10446.3	6842.17	8269.14	8258.93	9521.47	2712.17
915.39	14190.4	10046.9	6778.35	8335.72	8344.99	9539.28	2845.54
917.388	14646.5	9514.64	6696.3	8358.12	8476.61	9538.44	3028.68
919.387	15065.9	8845.52	6600.39	8348.75	8652.49	9502.61	3234.92
921.386	15401.3	8040.75	6505.79	8320.57	8835.56	9420.79	3454.01
923.384	15637.2	7125.25	6414.36	8294.52	8961.25	9286.51	3685.82
925.383	15769.7	6142.2	6337.01	8243.26	9023.9	9103.22	3924.54
927.382	15805.1	5160.38	6260.42	8197.23	9014.17	8887.47	4157.5
929.38	15748.4	4247.2	6177.08	8207.99	8945.72	8665.27	4363.72
931.379	15613.3	3440.59	6092.73	8316.29	8845.94	8461.77	4531.49
933.378	15406.2	2784.16	6010.27	8541.38	8728.6	8294.11	4647.76
935.376	15177.9	2261.97	5935.52	8961.95	8621.36	8191.73	4739.1
937.375	14983.3	1960.95	5860.67	9525.43	8540.09	8174.08	4803.12
939.374	14903.7	1847.99	5742.56	10040.2	8458.59	8198.61	4867.75
941.372	14927.5	1887.99	5564.62	10474.5	8324.63	8235.86	4930.24
943.371	15024.5	2096.29	5316.17	10811.7	8159.46	8281.61	4973.29
945.37	15182.8	2474.28	5004.19	11041.8	7981.12	8336.84	4994.66
947.368	15347.4	3019.82	4626.16	11147	7816.2	8391.3	4983.48
949.367	15494.1	3636.47	4186.08	11113.2	7652.19	8416.41	4967.25
951.366	15561.2	4213.61	3713.28	10922.9	7478.13	8377.83	4949.42
953.364	15502.2	4735.67	3255.13	10572	7293.62	8271.73	4904.03
955.363	15301.9	5202.74	2865.68	10045.3	7099.87	8103.08	4807.38
957.362	14918.2	5592.68	2613.34	9362.18	6926.3	7882.55	4626.35
959.36	14335.5	5873.39	2566.9	8558.41	6756.3	7618.1	4339.04
961.359	13514.7	6026.44	2787.34	7723.15	6560.72	7322.47	3915.73
963.358	12432	6035.61	3144.21	6992.62	6307.42	6982.38	3383.13
965.356	11111	5891.83	3517.33	6535.81	6008.71	6612.94	2770.67
967.355	9611.13	5592.19	3875.11	6192.99	5694.68	6193.22	2101.52
969.354	8042.1	5144.32	4202.09	6060.25	5402.46	5770.24	1434.54
971.352	6675.75	4557.69	4495.45	6124.6	5181	5406.9	965.403
973.351	5673.77	3862.42	4752.08	6244.24	5089.04	5124.31	906.685
975.35	4766.54	3148.01	4972.29	6345.43	5092.16	4864.89	1141.55
977.348	4336.83	2507.33	5163.02	6413.5	5157.27	4715.59	1440.32
979.347	3915.45	2078.25	5329.69	6441.05	5256.4	4604.17	1671.86
981.346	3521.55	1711.37	5481.49	6422.72	5353.3	4498.09	1878.97
983.344	3546.36	1420.01	5633.5	6370.74	5456.83	4485.49	2005.91
985.343	3632.87	1208.35	5797.21	6315.11	5588.33	4508.37	2106.44
987.342	3968.75	1120.25	5985.11	6281.24	5745.18	4620.11	2154.16
989.34	4583.98	1153.88	6192.97	6281.84	5919.53	4826.44	2163.73
991.339	5260.81	1299.26	6413.53	6320.7	6123.49	5083.56	2164.09
993.338	5961.81	1561.67	6611.26	6369.3	6371.16	5375.04	2144.48
995.336	6673.75	1946.91	6784.28	6416.49	6647.36	5693.76	2098.82
997.335	7377.85	2407.57	6937.97	6447.22	6899.09	6013.94	2042.74
999.334	8042.46	2876.51	7077.67	6462.99	7088.98	6309.72	2000.61
1001.33	8643.93	3339.89	7205.4	6468.21	7205.91	6572.67	1971.88
1003.33	9173.42	3795.47	7306.44	6465.27	7255.23	6799.17	1951.67
1005.33	9613.38	4236.59	7352.43	6455.26	7241.89	6979.91	1932.85
1007.33	9952.24	4655.56	7333.81	6449.54	7158.97	7110.02	1909.93
1009.33	10191.6	5045.8	7256.86	6450.57	7024.94	7193.96	1883.2
1011.33	10340.9	5404.8	7139.08	6467.71	6861.08	7242.71	1852.94
1013.32	10412.1	5731.49	6994.71	6492.69	6671.8	7260.55	1821.88
1015.32	10422.1	6023.8	6828.73	6489.4	6496.88	7252.19	1795.08
1017.32	10383	6280.19	6662.12	6420.47	6367.16	7222.59	1772.42
1019.32	10307.5	6491.26	6505.15	6286.68	6250.09	7168.13	1758.75
1021.32	10222	6663.45	6369.37	6107.7	6174.62	7107.43	1754.43
1023.32	10156.1	6811.58	6272.02	5907.63	6163.74	7062.21	1760.66
1025.32	10157	6956.38	6229.49	5699.91	6240.82	7056.71	1789.73
1027.32	10256.4	7102.83	6262.9	5535.47	6398.74	7111.28	1844.1
1029.31	10385.9	7207.89	6327.87	5461.24	6607.09	7198	1889.8
1031.31	10509.3	7265.63	6407.84	5421.68	6832.77	7287.45	1926.3
1033.31	10564.7	7285.55	6504.6	5397.43	7036.22	7357.7	1934.16
1035.31	10513.9	7276.35	6626.42	5412.51	7219.71	7409.77	1890.24
1037.31	10346.6	7234.84	6778.72	5474.07	7372.53	7441.35	1788.65
1039.31	10057.4	7147.31	6954.32	5569.86	7475.11	7440.8	1633.32
1041.31	9656.42	7016.58	7157.7	5688.1	7552.61	7414.28	1436.14
1043.3	9144.2	6852.24	7346.71	5814.86	7633.59	7358.32	1214.87
1045.3	8568.55	6660.42	7500.55	5947.12	7677.73	7270.87	1003.4
1047.3	7991.86	6460.54	7605.79	6086.47	7675.92	7164.12	836.441
1049.3	7574.8	6275.66	7668.91	6225.51	7623.62	7073.7	752.343
1051.3	7294.93	6092.55	7699.59	6330.63	7557.05	6994.95	734.527
1053.3	7010.48	5872.01	7701.46	6397.28	7494.42	6895.13	761.126
1055.3	6771.57	5602.72	7683.4	6438.04	7443.51	6787.85	830.522
1057.3	6557.38	5289.35	7639.91	6477.35	7419.74	6676.74	929.866
1059.29	6360.15	4943.45	7550.33	6538.17	7382.12	6554.85	1038.05
1061.29	6183.34	4591.25	7395.25	6647.66	7293.38	6422.18	1136.45
1063.29	6037.77	4269.69	7167.14	6825.69	7149.43	6289.95	1218.63
1065.29	5928.43	4018.39	6861.29	7028.49	6965.18	6160.35	1278.14
1067.29	5825.18	3865.76	6473.91	7184.25	6746.9	6019.2	1300.83
1069.29	5719.06	3789.01	6019.59	7288.14	6524.62	5868.08	1305.3
1071.29	5653.2	3795.8	5521.99	7332.89	6332.73	5727.32	1296.42
1073.28	5624.54	3903.16	5011.6	7324.89	6211.65	5615.17	1282.02
1075.28	5612.67	4114.61	4550.94	7274.96	6141.87	5539.01	1263.68
1077.28	5630.68	4408.46	4202.86	7206.03	6116.38	5512.88	1243.05
1079.28	5679.98	4740.33	3988.63	7147.37	6158.4	5542.94	1227.99
1081.28	5767.13	5078.78	3925.32	7115.62	6189.13	5615.2	1198.66
1083.28	5891.41	5408.86	3956.37	7139.6	6172.57	5713.76	1167.95
1085.28	6021.02	5717.45	4085.13	7264.27	6121.78	5841.93	1144.04
1087.28	6145.86	6000.76	4267.2	7456.16	6055.57	5985.11	1134.27
1089.27	6267.73	6244.89	4468.02	7563.32	5990.78	6106.95	1102.89
1091.27	6385.15	6451.3	4645.69	7578.33	5950.34	6202.16	1057.76
1093.27	6486.88	6625.12	4802.18	7487.4	5967.48	6273.81	987.569
1095.27	6548.11	6759.35	4946.39	7286.88	6064.73	6321.09	884.857
1097.27	6547.7	6864.05	5094.36	6990.39	6138.06	6326.91	763.598
1099.27	6480.81	6945.32	5249.91	6608.39	6188.31	6294.55	644.062
1101.27	6351.72	6993.89	5423.08	6155.03	6232.36	6231.22	560.151
1103.26	6151.33	7021.05	5601.81	5681.98	6268.1	6144.85	568.354
1105.26	5896.61	7033.09	5779.99	5254	6278.6	6048.46	661.203
1107.26	5600.51	7038.78	5963.57	4955.34	6262.48	5964.14	773.588
1109.26	5288.84	7053.51	6138.46	4813.68	6235.11	5905.92	873.668
1111.26	4980.59	7044.85	6310.76	4777.97	6212.56	5865.35	958.561
1113.26	4710.99	7018.39	6469.92	4868.41	6201.65	5853.87	1016.6
1115.26	4529.52	6988.65	6601.11	5057.9	6210.74	5877.58	1043.8
1117.26	4496.85	6956.63	6699.51	5294.46	6260	5941.49	1026.18
1119.25	4654.81	6934.11	6760.68	5565.59	6359.07	6054.85	943.841
1121.25	4830.43	6922.39	6776.36	5855.14	6475.9	6172.04	854.532
1123.25	5008.02	6915.42	6740.11	6157.04	6594.55	6283.03	766.061
1125.25	5173.1	6897.56	6657.66	6470.18	6718.74	6383.45	693.612
1127.25	5291.63	6856.8	6523.05	6787.45	6833.13	6458.41	665.761
1129.25	5355.32	6804.82	6342.34	7097.76	6882.54	6496.56	694.92
1131.25	5364.45	6756.25	6135.29	7394.37	6862.33	6502.54	777.702
1133.24	5344.77	6720.76	5918.34	7631.15	6765.26	6476.05	875.872
1135.24	5321.21	6717.39	5712.44	7786.17	6609.15	6429.27	961.535
1137.24	5302.77	6767.78	5537.91	7854.67	6395.88	6371.8	1024.02
1139.24	5301.69	6872.53	5414.25	7830.97	6140	6311.89	1058.03
1141.24	5303.81	6972.68	5373.25	7721.42	5859.68	6246.17	1061.08
1143.24	5313.75	7063.27	5418.8	7534.99	5584.67	6183.1	1036.87
1145.24	5369.57	7131.57	5534.2	7273.75	5377.72	6137.36	975.988
1147.24	5467	7168.78	5709.49	6939.2	5289.42	6114.78	874.025
1149.23	5592.22	7170.66	5936.52	6559.15	5350.28	6121.77	741.859
1151.23	5750.8	7145.13	6211.93	6192.72	5564.13	6172.94	611.537
1153.23	5945.67	7102.65	6538.02	5902.38	5941.12	6285.97	527.342
1155.23	6172.16	7055.1	6920.21	5666.62	6297.65	6422.35	569.544
1157.23	6421.64	7009.88	7328.95	5527.59	6598.14	6577.24	685.324
1159.23	6632.41	6983.82	7711.19	5523.8	6843.28	6738.9	791.208
1161.23	6797.14	6985.41	8035.1	5657.99	7033.45	6901.82	846.567
1163.22	6915.1	6995.21	8285.36	5856.27	7163.93	7043.17	863.863
1165.22	6991.35	7018.6	8446.08	6026.02	7240.94	7144.6	865.116
1167.22	7016.66	7061.37	8508.18	6165.13	7274.07	7205.08	842.684
1169.22	6928.38	7131.61	8471.42	6280.1	7276.79	7217.66	797.737
1171.22	6732.9	7216.29	8337.74	6371.8	7263.99	7184.54	741.908
1173.22	6447.72	7312.1	8117.1	6451.29	7267.24	7119.09	698.556
1175.22	6107.41	7407.25	7813.84	6527.94	7326.37	7036.56	697.779
1177.22	5755.9	7469.55	7458.58	6610.75	7432.27	6945.41	758.621
1179.21	5438.4	7468.28	7098.64	6709.91	7539.65	6850.98	856.147
1181.21	5252.75	7383.66	6788.67	6821.58	7575.64	6764.46	912.487
1183.21	5187.32	7191.41	6569.78	6933.41	7546	6685.58	910.468
1185.21	5155.11	6864.55	6470.12	7017.14	7463.8	6594.14	879.568
1187.21	5088.53	6399.08	6451.43	7043.36	7363.76	6469.23	871.977
1189.21	4993.77	5793.96	6424.43	7016.22	7253.27	6296.33	921.876
1191.21	4838.94	5069.22	6373.7	6954.35	7147.1	6076.66	1066.69
1193.2	4683.95	4277.25	6291.97	6890.16	7022.54	5833.18	1273.18
1195.2	4538.28	3512.75	6156.84	6849.51	6887.87	5589.05	1501.1
1197.2	4451.35	2873.8	5958.19	6843.97	6713	5368.06	1687.98
1199.2	4405.54	2463.44	5678.02	6877.39	6495.12	5183.9	1791.52
1201.2	4436.56	2227.28	5304.86	6909.22	6253.16	5026.21	1824.18
1203.2	4564.36	2187.6	4841.9	6930.92	6025.46	4910.05	1793.32
1205.2	4823	2361.03	4320.97	6945.3	5855.09	4861.08	1723.04
1207.2	5173.98	2696.7	3799.26	6960.6	5800.38	4886.19	1673.1
1209.19	5565.76	3170.92	3377.78	6973.54	5880	4993.6	1655.77
1211.19	5999.78	3643.54	3159.57	6963.4	6109.01	5175.06	1670.2
1213.19	6460.06	4055.63	3254.49	6918.09	6487.23	5435.1	1659.42
1215.19	6849.16	4385.74	3621.58	6832.54	6951.15	5728.03	1597.79
1217.19	7153.2	4598.93	4037.34	6712.56	7422.82	5984.97	1555.31
1219.19	7363.83	4673.29	4450.02	6570.29	7866.29	6184.74	1554.05
1221.19	7481.01	4606.49	4840.31	6418.63	8237.48	6316.78	1593.74
1223.18	7513.72	4384.84	5199.58	6261.46	8516.1	6375.14	1676.03
1225.18	7483.1	4007.44	5526.05	6113.23	8681.19	6362.2	1798.62
1227.18	7410.59	3484.92	5825.3	5991.96	8728.21	6288.2	1960.47
1229.18	7301.17	2878.48	6100.78	5914.47	8662.29	6171.44	2144.48
1231.18	7177.67	2248.48	6361.4	5859.1	8500.13	6029.36	2337.61
1233.18	7079.98	1699.07	6613.56	5831.77	8262.26	5897.33	2506.7
1235.18	6993.58	1327.92	6844.62	5833.97	7960.94	5792.2	2607
1237.18	6873.37	1063.38	7033.14	5855.86	7611.19	5687.39	2661.22
1239.17	6722.01	901.398	7157.51	5889.47	7250.59	5584.2	2672.48
1241.17	6513.38	794.886	7201.33	5943.02	6938.54	5478.23	2660.96
1243.17	6247.64	765.206	7149.79	6028.48	6709.19	5380.06	2615.75
1245.17	5920.53	824.247	6988.62	6155.92	6629.79	5303.82	2538.19
1247.17	5549.72	989.33	6705.99	6330.44	6610.56	5237.21	2417.68
1249.17	5169.3	1273.87	6299.46	6550.91	6571.14	5172.94	2254.2
1251.17	4802.44	1683.53	5761.25	6799.12	6493.93	5108.06	2063.24
1253.16	4475.5	2215.34	5098.5	7051.35	6393.88	5046.91	1882.76
1255.16	4250.35	2781.49	4346.61	7296.21	6277.28	4990.39	1789.85
1257.16	4197.5	3300.82	3569.45	7529.32	6158.53	4951.12	1823.83
1259.16	4340.22	3770.79	2844.62	7746.36	6056.75	4951.75	1951.89
1261.16	4500.31	4177.86	2244.16	7950.09	5987.71	4972.03	2132.78
1263.16	4658.87	4492.14	1881.36	8129.05	5965.71	5025.43	2281.47
1265.16	4811.32	4700.08	1629.14	8259.79	6005.07	5081.08	2402.7
1267.16	4951.27	4792.09	1479.09	8325.28	6111.49	5131.84	2482.36
1269.15	5079.16	4760.2	1414.56	8328.68	6187.02	5153.93	2514.45
1271.15	5199.96	4603.31	1466.59	8279.45	6226.29	5155.12	2491.01
1273.15	5304.63	4337.69	1649.45	8174.28	6251.05	5143.42	2413.3
1275.15	5386.37	3990.93	1957.19	8021.23	6269.52	5125.05	2296.06
1277.15	5423.23	3582.65	2383.92	7826.82	6313.42	5106.01	2161.69
1279.15	5411.46	3151.68	2822.63	7595.48	6405.56	5077.36	2062.08
1281.15	5355.45	2754.63	3258.05	7342.41	6552.67	5052.64	2005.38
1283.14	5281.16	2470.98	3677.59	7095.47	6723.99	5049.84	1973.23
1285.14	5216.55	2404.02	4074.59	6897.13	6863.09	5091.08	1915.14
1287.14	5199.77	2535.82	4448.95	6796.16	6961.14	5188.37	1824.18
1289.14	5259.72	2842.98	4789.67	6833.62	7017.63	5348.73	1702.16
1291.14	5458.83	3332.38	5079.79	6911.5	7039.81	5564.46	1518.17
1293.14	5828.95	3879.61	5311.49	7005.31	7059.76	5817.03	1319.63
1295.14	6288.49	4453.42	5478.88	7114.09	7091.96	6085.37	1134
1297.14	6757.54	5022.18	5584.09	7225.24	7151.18	6348.05	990.421
1299.13	7246.11	5572.04	5621.56	7321.12	7230.87	6598.34	915.085
1301.13	7747.17	6098.45	5599.96	7401.21	7309.92	6831.34	928.162
1303.13	8225.78	6586.87	5515.73	7474.13	7382.59	7037.02	1029.63
1305.13	8607.44	7030.07	5397.94	7548.59	7422.03	7201.21	1164.91
1307.13	8887.67	7422.42	5269.29	7648.01	7424.1	7330.3	1303.02
1309.13	9066.72	7754.72	5143.01	7787.42	7389.49	7428.27	1426.88
1311.13	9150.93	8021.2	5011.4	7982.18	7323.04	7497.75	1537.38
1313.12	9148.16	8214.51	4803.55	8249.3	7219.67	7527.04	1668.4
1315.12	9079.45	8314.61	4513.91	8572.48	7083.54	7512.8	1830.15
1317.12	8938.49	8296.32	4160.53	8951.48	6913.65	7452.09	2018.33
1319.12	8766.46	8171.11	3759.28	9377.29	6715.31	7357.89	2240.89
1321.12	8589.12	7965.48	3352.3	9751.2	6519.86	7235.59	2464.01
1323.12	8462.38	7718.91	3009.34	10034	6358.87	7116.7	2651.83
1325.12	8478.52	7463.55	2799.35	10191.7	6273.19	7041.26	2772.77
1327.12	8440.35	7237.37	2808.03	10184.2	6312.96	6996.59	2752.95
1329.11	8352.84	7131.16	3122.57	10015.5	6428.86	7010.18	2564.2
1331.11	8178.78	7229.74	3652.8	9668.12	6543.42	7054.57	2233.75
1333.11	7964.99	7448.14	4224.95	9129.59	6645.87	7082.71	1834.35
1335.11	7652.78	7706.32	4776.05	8412.71	6732.73	7056.12	1407.34
1337.11	7287.6	7996.15	5277.59	7512.08	6812.06	6977.1	1041.23
1339.11	6884.8	8273.58	5725.56	6478.12	6894.75	6851.36	926.341
1341.11	6456.46	8516.06	6116.32	5423.63	6976.82	6697.86	1162.3
1343.1	6050.05	8726.71	6448.07	4484.11	7000.64	6541.92	1538.59
1345.1	5731.32	8912.64	6719.13	3851.98	6963.4	6435.69	1848.36
1347.1	5587.1	9079.72	6937.81	3620.86	6891.91	6423.48	2005.85
1349.1	5549.21	9229.76	7111.54	3216.06	6817.5	6384.81	2210.67
1351.1	5646.5	9363.96	7232.85	2968.47	6756.2	6393.6	2342.46
1353.1	5774.9	9498.51	7302.98	3042.54	6721.27	6468.04	2353.69
1355.1	5936.33	9651.5	7327.66	3103.91	6711.34	6546.15	2371.82
1357.1	6112.06	9832.42	7305.52	3492.77	6709.46	6690.45	2280.92
1359.09	6268.79	10060.9	7239.48	3985.25	6726.71	6856.23	2180.67
1361.09	6362.75	10346.9	7108.33	4535.8	6766.43	7024.03	2106.13
1363.09	6381.79	10619.5	6932.02	5105.49	6820.96	7171.95	2059.18
1365.09	6331.91	10827.6	6741.26	5639.29	6871.68	7282.35	2039.19
1367.09	6218.98	10958.1	6563.4	6125.31	6906.97	7354.55	2037.92
1369.09	6055.04	10998.2	6424.74	6554.46	6922.7	7391.03	2040.19
1371.09	5848.68	10942.5	6371.37	6915.93	6916.35	7398.97	2029.92
1373.08	5641.33	10773.8	6438.32	7198.78	6873.07	7385.06	1982.25
1375.08	5489.82	10479	6578.87	7406.04	6784.75	7347.69	1882.02
1377.08	5414.52	10047.8	6744.91	7544.94	6654.81	7281.39	1723.95
1379.08	5373.12	9479.96	6905.71	7622.86	6492.61	7174.85	1524.66
1381.08	5324.91	8788.55	7035.64	7655.54	6308.81	7022.69	1314.44
1383.08	5283.87	8030.24	7127.4	7652.11	6136.43	6846.01	1126.41
1385.08	5280.29	7279.44	7187.56	7620.93	5992.98	6672.24	991.613
1387.08	5332.73	6655.32	7224.78	7567.58	5850.19	6526.12	931.466
1389.07	5450.59	6250.6	7254.41	7500.26	5720.79	6435.33	910.956
1391.07	5604.61	6068.66	7282.98	7424.66	5648.75	6405.93	885.468
1393.07	5749.49	6189.15	7325.46	7347.93	5629.79	6448.36	837.291
1395.07	5879.43	6572.86	7387.99	7278.8	5643.24	6552.46	791.477
1397.07	5985.86	6967.11	7452.75	7223.81	5706.06	6667.12	775.382
1399.07	6074.86	7351.27	7519.99	7167.66	5822.29	6787.21	780.768
1401.07	6161.13	7708.22	7585.69	7107.99	6015.46	6915.7	789.582
1403.06	6268.47	8029.09	7636.84	7043.51	6272.63	7050.11	793.433
1405.06	6402.15	8298.05	7663.28	6974.66	6494.17	7166.46	806.266
1407.06	6534.23	8500.42	7665.1	6901.97	6657.94	7251.93	824.593
1409.06	6667.13	8640.09	7650.29	6798.09	6764.87	7304.09	845.169
1411.06	6810.88	8729.76	7627.13	6667.98	6817.1	7330.57	868.684
1413.06	6949.39	8793.42	7605.46	6531.75	6821.77	7340.36	902.399
1415.06	7038.13	8849.9	7599.1	6411.96	6795.59	7338.94	948.116
1417.06	7044.77	8914.76	7612.7	6327.26	6745.33	7328.96	1002.5
1419.05	6964.5	8993.39	7623.66	6298.29	6680.5	7312.07	1057.28
1421.05	6797.69	9096.77	7638.71	6358.22	6573.17	7292.91	1119.19
1423.05	6542.95	9222.29	7666.7	6520.08	6435.58	7277.52	1199.56
1425.05	6209.48	9348.17	7716.22	6698.2	6276.6	7249.73	1318.56
1427.05	5815.11	9451.92	7793.56	6878.62	6116.97	7211.24	1467.73
1429.05	5420.83	9519.39	7904.38	7055.24	5970.98	7174.17	1625.52
1431.05	5099.09	9544.75	8054.49	7219.14	5849.4	7153.37	1764.62
1433.04	4957.78	9532.77	8213.6	7368.34	5764.13	7167.33	1842.65
1435.04	5053.48	9487.08	8342.56	7482.37	5734.14	7219.93	1828.27
1437.04	5188.53	9416.2	8421.35	7559.43	5738.81	7264.86	1781.32
1439.04	5357.29	9332.46	8447.76	7597.41	5761.41	7299.26	1708.66
1441.04	5576.64	9246.15	8422.17	7600.73	5797.32	7328.6	1609.44
1443.04	5850.81	9163.52	8344.77	7576.17	5841.88	7355.43	1487.57
1445.04	6149.36	9093.65	8227.22	7529.07	5889.83	7377.83	1361.22
1447.04	6457.56	9042.38	8075.28	7469.71	5928.74	7394.73	1246.09
1449.03	6763.69	8997.81	7901.7	7418.33	5953.82	7407.07	1151.21
1451.03	7052.49	8959.82	7724.13	7393.41	5979.58	7421.89	1080.99
1453.03	7295.72	8934.23	7569.26	7369.41	6014.98	7436.72	1037.53
1455.03	7466.9	8933.46	7477.09	7316.28	6046.88	7448.12	1023.26
1457.03	7560.79	8969.35	7424.67	7251.14	6081.94	7457.58	1028.61
1459.03	7584.98	9043.04	7372.57	7189.49	6134.92	7465	1043.81
1461.03	7557.97	9120.86	7321.38	7144.08	6212.13	7471.28	1053.99
1463.02	7492.64	9202.77	7280.32	7127.42	6308.34	7482.3	1061.25
1465.02	7389.47	9288.7	7251.78	7127.58	6396.72	7490.85	1075.73
1467.02	7261.32	9374.1	7242.16	7137.35	6469.95	7496.98	1098.66
1469.02	7096.12	9435.15	7251.16	7159.26	6507	7489.74	1126
1471.02	6898.63	9438.33	7279.61	7187.99	6500.51	7461.01	1146.31
1473.02	6710.79	9376.79	7325.53	7228.15	6472.44	7422.74	1148.43
1475.02	6572.17	9256	7380.93	7290.28	6403.38	7380.55	1132.9
1477.02	6470.25	9087.19	7429.84	7376.19	6311.26	7334.95	1104.16
1479.01	6398.31	8882.68	7479.42	7487.01	6200.97	7289.68	1071.5
1481.01	6372.57	8657.1	7541.9	7607.49	6053.07	7246.43	1048.26
1483.01	6392.13	8444.97	7618.61	7712.48	5849.28	7203.49	1056.51
1485.01	6438.5	8294.78	7704.81	7784.36	5592.39	7162.97	1112.69
1487.01	6490.37	8228.81	7812.71	7819.79	5284.83	7127.31	1220.96
1489.01	6560.95	8215.55	7959.42	7824.82	4955.39	7103.23	1359.99
1491.01	6658.19	8229.1	8151.02	7806.21	4626.8	7094.26	1515.75
1493	6778.69	8266.74	8392.4	7776.77	4326.69	7108.26	1679.56
1495	6921.1	8334.93	8644.58	7749.89	4041.98	7138.5	1851.3
1497	7070	8446.34	8814.33	7730.94	3793.24	7170.97	2003.75
1499	7173.85	8607.47	8878.16	7707.25	3608.15	7194.98	2118.75
1501	7226.96	8814.31	8835.97	7668.85	3516.53	7212.52	2183.47
1503	7236.41	9053.32	8692.37	7631.09	3536.08	7229.85	2194.82
1505	7209.66	9280.94	8462.51	7606.78	3609.14	7233.8	2178.21
1507	7170.43	9471.23	8170.51	7604.95	3722.38	7227.9	2142.15
1508.99	7129.82	9624.12	7839.86	7640.19	3868.26	7220.45	2096.6
1510.99	7106.68	9739.57	7487.22	7692.59	4056.6	7216.53	2041.01
1512.99	7137.93	9822.9	7155.52	7751.75	4296.13	7232.85	1975.91
1514.99	7217.46	9888.06	6928.42	7809.76	4589.36	7286.61	1900.62
1516.99	7282.37	9944.99	6884.44	7860.12	4913.94	7377.18	1812.88
1518.99	7322.45	9998.87	7063.84	7888.2	5220.19	7498.71	1718.6
1520.99	7339.15	10056.8	7321.72	7884.27	5461.45	7612.68	1645.82
1522.98	7339.87	10096.9	7559.52	7853.12	5652.26	7700.33	1589.91
1524.98	7324.27	10078.8	7768.07	7800.35	5808.75	7756.06	1531.01
1526.98	7292.11	10012.9	7932.1	7733.53	5950	7784.13	1466.12
1528.98	7254.18	9922.51	8036.75	7659.69	6097.11	7794.05	1394.48
1530.98	7208.89	9822.76	8079.04	7581.65	6261.26	7790.72	1316.61
1532.98	7135.99	9708.12	8065.93	7509.99	6459.66	7775.94	1227.83
1534.98	7031.36	9560.82	8004.4	7460.78	6675.08	7746.49	1129.08
1536.98	6891.79	9354	7905.3	7439.56	6906.25	7699.38	1015.99
1538.97	6722.03	9071.55	7764.99	7404.82	7133.96	7619.47	896.787
1540.97	6545.98	8694.35	7588.86	7348.48	7329.92	7501.52	774.016
1542.97	6373.16	8197.87	7393.25	7250.91	7457.4	7334.52	650.985
1544.97	6215.76	7547.89	7168.5	7105.85	7509.83	7109.56	537.289
1546.97	6082.01	6744.81	6899.16	6893.73	7482.79	6820.5	500.319
1548.97	5982.01	5816.93	6562.44	6602.71	7373.17	6467.45	613.692
1550.97	5932.76	4823.31	6159.06	6233.31	7194.76	6068.64	847.458
1552.96	5941.71	3852.71	5696.13	5809.58	6952.73	5650.57	1122.5
1554.96	6042.49	3020.84	5177.49	5366.91	6668.34	5255.21	1380.91
1556.96	6250	2326.71	4626.19	4962.98	6361.81	4905.54	1632.48
1558.96	6473.39	1830.83	4081.11	4687.99	6069.9	4628.64	1844.68
1560.96	6664.37	1499.03	3558.49	4637.08	5870.56	4445.91	2028.5
1562.96	6833.8	1241.77	3019.53	4877.52	5787.05	4351.93	2232.93
1564.96	7008.66	1062.93	2472.29	5142.88	5794.8	4296.31	2454.63
1566.96	7219.92	982.425	1952.81	5439	5902.46	4299.32	2688.25
1568.95	7479.49	1015.81	1521.34	5745.02	6058.39	4364.01	2905.84
1570.95	7833.52	1184.65	1242.95	6027.99	6227.35	4503.29	3083.45
1572.95	8236.5	1512.32	1033.77	6273.39	6382.11	4687.62	3217.67
1574.95	8592.37	2014.17	856.559	6470.24	6492.86	4885.24	3290.62
1576.95	8881.7	2697.7	704.401	6620.18	6550.59	5090.91	3309.39
1578.95	9090.41	3528.97	579.4	6723.41	6555.81	5295.6	3293.59
1580.95	9209.52	4362.67	480.136	6788	6519.95	5472.06	3276.75
1582.94	9227.04	5163.28	399.18	6826.77	6466.91	5616.64	3265.34
1584.94	9133.55	5922.12	333.272	6843.59	6408.85	5728.27	3257.55
1586.94	8921.64	6623.98	280.921	6850.74	6371.49	5809.75	3252.46
1588.94	8578.35	7265.28	238.281	6851.1	6387.26	5864.06	3249.16
1590.94	8098.18	7843.97	204.149	6821.48	6469.25	5887.41	3249.08
1592.94	7507.48	8356.11	176.477	6730.61	6599.09	5873.95	3261.53
1594.94	6843.81	8800.69	153.871	6561.62	6768.49	5825.7	3297.24
1596.94	6135.53	9177.53	135.638	6307.92	6956.15	5742.55	3360.93
1598.93	5397.98	9494.08	121.226	5962.97	7103.31	5615.91	3450.07
1600.93	4673.98	9745.85	109.099	5528.98	7178.45	5447.27	3555.82
1602.93	4017.89	9931.36	104.528	5023.88	7176.57	5250.84	3663.06
1604.93	3520.65	10058.4	115.344	4468.73	7098.67	5052.35	3751.95
1606.93	3252.85	10140.6	151.962	3901.35	6950.31	4879.42	3805.26
1608.93	3290.59	10203.9	229.072	3328.14	6748.21	4759.99	3818.64
1610.93	3551.02	10266.2	367.806	2806.11	6507.04	4699.63	3805.34
1612.92	3879.19	10359.1	591.763	2403.91	6258.32	4698.46	3784.09
1614.92	4259.7	10524.5	928.474	2195.32	6053.27	4792.26	3755.18
1616.92	4679.3	10775.1	1401.96	2198.94	5926.88	4996.44	3711.67
1618.92	5116.01	11053.9	2030.81	2405.16	5864.1	5294	3623.77
1620.92	5553.79	11324.3	2821.65	2748	5818.19	5653.18	3487.69
1622.92	5979.4	11551.7	3684.73	3147.54	5746.91	6022.05	3330.93
1624.92	6380.57	11702.3	4525.68	3572.2	5657.19	6367.59	3169.02
1626.92	6728.24	11768.1	5323.75	4006.89	5559.69	6677.34	3005.48
1628.91	7016.09	11757.4	6063.05	4450.72	5447.17	6946.89	2846.37
1630.91	7244.83	11677.9	6736.97	4901.39	5309.47	7174.12	2698.27
1632.91	7414.49	11536.6	7335.42	5352.98	5168.65	7361.64	2563.1
1634.91	7531.92	11342.2	7845.75	5796.45	5029.08	7509.08	2443.88
1636.91	7613.49	11108.7	8265.7	6222.79	4915.88	7625.3	2337.31
1638.91	7675.57	10880.3	8593.45	6623.09	4831.8	7720.84	2252.61
1640.91	7733.02	10713.5	8834.35	6996.61	4797.63	7815.03	2192.12
1642.9	7814.73	10596.5	8998.87	7342.3	4829.17	7916.31	2134.57
1644.9	7955.19	10490.1	9098.4	7666.19	4943.95	8030.76	2052.75
1646.9	8187.97	10362.6	9149.26	7973.47	5118.03	8158.26	1944.16
1648.9	8510.67	10214	9165.06	8261.6	5299.25	8290.11	1834.5
1650.9	8780.04	10038.8	9169.45	8523.04	5482.66	8398.81	1728.31
1652.9	8970.43	9835.94	9181.02	8731.65	5661.04	8476.01	1626.37
1654.9	9080.03	9610.15	9198.65	8862.25	5823.08	8514.83	1529.14
1656.9	9105.73	9364	9198.22	8912.23	5973.71	8510.78	1427.62
1658.89	9048.59	9107.78	9185.94	8879.42	6111.88	8466.72	1321.21
1660.89	8918.28	8841.54	9145.24	8768.51	6233.71	8381.46	1208.91
1662.89	8738.95	8582.69	9047.53	8586.22	6344.98	8260.08	1087.14
1664.89	8517.92	8337.03	8907.25	8351.78	6445.42	8111.88	959.532
1666.89	8293.64	8080.61	8747.87	8093.24	6539.63	7951	833.876
1668.89	8093.01	7816.18	8581.33	7848.64	6619.95	7791.82	723.04
1670.89	7978.08	7556.58	8432.32	7665.54	6689.01	7664.31	642.476
1672.88	7963.9	7324.11	8338.67	7556.73	6728.75	7582.43	615.139
1674.88	8041.45	7121.64	8329.11	7459.96	6736.38	7537.71	652.179
1676.88	8157.92	6939.02	8369.9	7368.9	6723.77	7511.9	728.575
1678.88	8294.38	6783.01	8444.59	7283.52	6717.36	7504.57	821.071
1680.88	8447.65	6654.03	8490.24	7194.3	6726.58	7502.56	906.351
1682.88	8617.18	6560.31	8485.03	7099.33	6767.95	7505.96	974.378
1684.88	8811.83	6507.33	8426.17	7003.32	6845.53	7518.84	1029.24
1686.88	9048.89	6473.19	8311.74	6913.8	6942.38	7538	1090.83
1688.87	9330.27	6480.1	8148.41	6838.06	7061.2	7571.61	1163.57
1690.87	9606.95	6560.63	7936.68	6789.91	7180.17	7614.87	1230.13
1692.87	9816.5	6730.24	7690.48	6779.18	7274.68	7658.22	1268.87
1694.87	9951.19	7012.72	7434.77	6784.18	7349.57	7706.48	1281.78
1696.87	10007	7408.02	7208.71	6776.2	7410.42	7762.08	1281.31
1698.87	9980.62	7769.31	7042.58	6753.34	7468.21	7802.81	1278.21
1700.87	9877.56	8099.46	6964.27	6722.97	7540.01	7840.86	1257.34
1702.86	9697.14	8389.35	6965.67	6689.72	7629.68	7874.31	1212.1
1704.86	9426.4	8639.08	6996.98	6664.75	7664.22	7878.29	1147.9
1706.86	9063.1	8853.84	7019.21	6658.39	7617.84	7842.48	1077.39
1708.86	8623	9013.19	7042.05	6669.99	7516.88	7773.02	1009.59
1710.86	8120.89	9104.81	7079.61	6689.44	7402.22	7679.39	954.371
1712.86	7518.99	9132.44	7139.58	6712.24	7290.06	7558.66	927.706
1714.86	6806.57	9115	7223.47	6746.72	7214.74	7421.3	972.546
1716.86	5995.78	9062.3	7326.8	6774.28	7205.51	7272.93	1127.95
1718.85	5121.38	8983.15	7423.27	6794.05	7181.91	7100.75	1384.38
1720.85	4248.37	8901.95	7487.6	6807.55	7111.11	6911.32	1690.91
1722.85	3442.68	8820.36	7501.1	6809	6999.1	6714.45	1990.49
1724.85	2760.97	8722.18	7469.89	6803.75	6856.03	6522.56	2240.29
1726.85	2244.67	8616.3	7411.02	6790.5	6694.67	6351.43	2420.15
1728.85	1885.93	8520.86	7345.82	6762.96	6532.38	6209.59	2536.6
1730.85	1680.32	8454.55	7286.02	6722.48	6383.07	6105.29	2595.75
1732.84	1576.74	8426.11	7243.16	6669.79	6262.28	6035.62	2622.39
1734.84	1554.05	8426.83	7221.58	6611.45	6186.34	6000.05	2624.73
1736.84	1599.01	8402.62	7197.3	6556.06	6158.86	5982.77	2593.63
1738.84	1721.35	8352.32	7165.61	6507.63	6152.13	5979.81	2523.77
1740.84	1921.27	8269.36	7129.9	6471.09	6139.4	5986.2	2413.66
1742.84	2190.48	8157.27	7066.33	6452.61	6113.3	5996	2265
1744.84	2522.77	8016.32	6969.01	6462.37	6011.17	5996.33	2080.24
1746.84	2899.52	7849.92	6854.14	6501.34	5823.2	5985.62	1873.92
1748.83	3307.48	7671.67	6728.8	6536.89	5565.79	5962.13	1661.69
1750.83	3742.56	7495.31	6597.09	6553.45	5270.65	5931.81	1458.04
1752.83	4188.95	7345.64	6480.96	6550.79	4972.91	5907.85	1288.19
1754.83	4631.79	7262.37	6403.89	6526.1	4708.55	5906.54	1175.76
1756.83	5062.37	7290.05	6396.52	6476.45	4529.45	5950.97	1126.73
1758.83	5473.19	7440.12	6464.9	6403.9	4541.92	6064.81	1099.52
1760.83	5858.93	7690.63	6534.45	6312.55	4847.11	6248.73	1034.56
1762.82	6214.58	7967.59	6600.2	6206.73	5150.65	6427.95	1015.64
1764.82	6524.36	8208.79	6668.94	6092.73	5449.15	6588.79	1022.23
1766.82	6770.27	8384.78	6745.11	5982.5	5734.88	6723.51	1035.49
1768.82	6953.86	8481.94	6829.73	5893.18	5991.36	6830.02	1039.85
1770.82	7080.4	8494.13	6920.73	5845.44	6218.55	6911.85	1018.58
1772.82	7159.39	8422.98	6994.03	5855.04	6411.01	6968.49	962.185
1774.82	7212.24	8276.16	7039.64	5910.44	6557.51	6999.2	874.379
1776.82	7249.62	8065.19	7060.47	6016.44	6659.13	7010.17	755.587
1778.81	7304.54	7809.25	7065.14	6147.13	6716.34	7008.48	624.371
1780.81	7413.09	7558.05	7058.96	6282.79	6733.21	7009.22	517.37
1782.81	7598.22	7369.78	7047.58	6425.2	6721.94	7032.55	474.154
1784.81	7838.4	7293.51	7042.94	6567.76	6682.25	7084.97	510.537
1786.81	8079.16	7374.52	7060.12	6710.19	6615.6	7167.92	591.448
1788.81	8304	7475.57	7110.98	6841.66	6518.72	7250.19	686.044
1790.81	8508.83	7549.15	7186.49	6953.72	6413.6	7322.36	780.922
1792.8	8671.47	7570.82	7281.36	7026.67	6314.84	7373.03	862.149
1794.8	8777.52	7539.41	7385.25	7062.66	6235.31	7400.03	920.261
1796.8	8827.06	7462.35	7486.9	7069.89	6174.25	7404.09	956.464
1798.8	8827.01	7358.64	7569.72	7059.45	6121.85	7387.33	976.693
1800.8	8783.65	7247.2	7628.57	7039.1	6065.89	7352.88	986.038
1802.8	8702.19	7155.18	7664.23	7026.28	6016.93	7312.96	979.813
1804.8	8582.73	7132.83	7683.06	7032.49	5984.19	7283.06	951.52
1806.8	8439.05	7235.36	7700.46	7042.35	5974.08	7278.26	906.099
1808.79	8263.34	7514.28	7725.73	7025.3	5992.64	7304.26	857.284
1810.79	8013.22	7918.39	7760.11	6976.68	6042.02	7342.08	833.817
1812.79	7669.4	8287.57	7807.6	6902.67	6107.85	7355.02	856.351
1814.79	7233.24	8616.28	7862.24	6808.98	6171.96	7338.54	943.308
1816.79	6716.24	8900.63	7924.55	6701.08	6234.65	7295.43	1093.9
1818.79	6161.92	9132.02	7999.37	6583.56	6283.77	7232.13	1290.7
1820.79	5623.62	9300.74	8084.38	6466.21	6327.23	7160.44	1497.71
1822.78	5148.84	9393.49	8173.5	6359.1	6366.95	7088.38	1681.16
1824.78	4761.03	9383.93	8262.54	6255.51	6411.84	7014.97	1815.85
1826.78	4500.04	9243.91	8350.8	6135.47	6466.17	6939.28	1879.07
1828.78	4359.83	8934.47	8440.01	5981.68	6526.17	6848.43	1866.34
1830.78	4315.75	8450.74	8531.32	5787.09	6594.23	6735.83	1798.72
1832.78	4252.86	7799.05	8616.7	5538.24	6671.82	6575.73	1742.37
1834.78	4147.52	6979.43	8692.93	5217.95	6766.14	6360.79	1745.75
1836.78	3987.13	6038.68	8753.07	4806.74	6882.94	6093.71	1856.88
1838.77	3767.51	5069.78	8778.35	4305.36	7033.17	5790.83	2079
1840.77	3496.46	4217.36	8758.5	3721.51	7217.23	5482.21	2365.77
1842.77	3178.42	3731.55	8699.72	3081.42	7420.29	5222.28	2641.34
1844.77	2820.09	3695.1	8598.16	2437.47	7559.75	5022.12	2851.22
1846.77	2461.12	3885.31	8457.2	1861.6	7623.82	4857.81	3011.38
1848.77	2140.2	4169.94	8271.28	1454.59	7609.45	4729.09	3105.68
1850.77	1887.87	4500.73	8025.57	1201	7521.28	4627.29	3129.83
1852.76	1732.66	4870.38	7713.82	984.203	7377.3	4535.67	3112.77
1854.76	1689	5270.97	7352.58	815.559	7190.68	4463.76	3059.48
1856.76	1746.3	5702.4	6966.6	693.149	6976.27	4416.94	2987.57
1858.76	1859.28	6159.34	6606.13	626.87	6761.61	4402.65	2925.37
1860.76	2039.24	6627.43	6337	623.919	6570.96	4439.71	2883.17
1862.76	2297.67	7076.43	6091.14	700.412	6436.23	4520.38	2837.42
1864.76	2634.18	7483.88	5829.4	871.824	6337.62	4631.38	2766.15
1866.76	3017.62	7826.08	5524.08	1150.91	6239.33	4751.6	2656.79
1868.75	3369.92	8096.81	5175.19	1549.56	6142.83	4866.86	2519.97
1870.75	3673.34	8295.2	4784.75	2070.31	6038.84	4972.49	2362.37
1872.75	3925.01	8422.53	4354.29	2654.1	5922.36	5055.66	2214.99
1874.75	4123.89	8486.32	3905.83	3221.62	5788.75	5105.28	2112.38
1876.75	4270.11	8496.77	3486	3762.85	5640.87	5131.32	2055.93
1878.75	4380.11	8465.86	3161.4	4268.26	5492.8	5153.69	2027.14
1880.75	4471.67	8397.43	3004	4733.51	5372.78	5195.88	1988.96
1882.74	4550.55	8286.45	3064.88	5151.95	5294.82	5269.73	1903.53
1884.74	4624.58	8124.14	3237.7	5518.29	5276.09	5356.16	1783.08
1886.74	4653.29	7928.15	3555.19	5831.8	5303.14	5454.31	1622.77
1888.74	4637.59	7718.93	3983.41	6089.72	5348.63	5555.66	1442.45
1890.74	4590.89	7525.35	4410.77	6293.28	5429.13	5649.89	1288.11
1892.74	4525.6	7399.75	4824.73	6453.19	5536.74	5748	1185
1894.74	4454.29	7398.19	5218.6	6577.23	5655.44	5860.75	1152.14
1896.74	4394.31	7564.06	5582.02	6676.69	5771.49	5997.72	1194.71
1898.73	4375.24	7761.83	5904.46	6765.47	5876.64	6136.73	1251.07
1900.73	4431.29	7943.07	6163.16	6852	5971.18	6272.14	1286.41
1902.73	4565.08	8093.43	6349.05	6945.4	6050.41	6400.67	1290.05
1904.73	4737.13	8214.38	6462.45	7054.94	6118.64	6517.51	1274.76
1906.73	4949.01	8307.19	6510.35	7156.72	6183.95	6621.44	1237.84
1908.73	5196.76	8375.5	6519.13	7217.49	6225.14	6706.8	1182.46
1910.73	5416.72	8400.63	6508.22	7233.76	6248.05	6761.48	1123.16
1912.72	5600.17	8369.31	6493.13	7207.78	6259.68	6786.02	1055.2
1914.72	5746.24	8296.33	6481.36	7155.61	6269.58	6789.82	982.117
1916.72	5839.84	8201.48	6487.03	7088.09	6289.69	6781.22	911.819
1918.72	5862.03	8093.41	6501.29	7021.38	6336.6	6762.94	851.295
1920.72	5801.44	7990.84	6518.72	6980.69	6385.5	6735.44	818.223
1922.72	5625.94	7921.77	6545.7	6990.83	6426.62	6702.17	841.046
1924.72	5333.54	7888.56	6600.81	7070.03	6461.43	6670.88	932.648
1926.72	4929.15	7866.28	6688.57	7192.38	6492.17	6633.71	1090.86
1928.71	4419.13	7817.08	6776.27	7339.97	6508.29	6572.15	1305.82
1930.71	3833.21	7740.84	6820.93	7516.9	6508.09	6483.99	1564.24
1932.71	3201.83	7636.78	6816.94	7719.41	6493.8	6373.75	1849.18
1934.71	2602.63	7508.3	6756.34	7922.02	6457.56	6249.37	2120.25
1936.71	2042.14	7359.43	6632.47	8105.3	6412.48	6110.36	2369.3
1938.71	1587.83	7201.46	6431.29	8247.85	6373.41	5968.37	2563.4
1940.71	1329.63	7048.54	6139.18	8334.37	6348.8	5840.1	2663.37
1942.7	1143.73	6896.7	5755.47	8354.03	6345.45	5699.08	2722.83
1944.7	1049.66	6749.28	5279.67	8302.51	6374.39	5551.1	2739.54
1946.7	1055.79	6629.8	4726.41	8186.33	6402.39	5400.15	2720.6
1948.7	1171.49	6549.41	4117.53	8010.71	6421.17	5254.06	2673.87
1950.7	1405.9	6517.25	3494.24	7782.88	6436.75	5127.4	2608.37
1952.7	1764.99	6546.44	2907.15	7517.34	6454.91	5038.16	2533.93
1954.7	2239.34	6655.42	2413.67	7248.9	6470.74	5005.61	2463.29
1956.7	2746.72	6823.62	2059.33	7021.64	6489.69	5028.2	2416.23
1958.69	3261.35	6983.25	1873.94	6881.81	6502.78	5100.63	2370.51
1960.69	3750.06	7128.08	1891.09	6828.1	6497.13	5218.89	2296.74
1962.69	4199.18	7259.03	2064.43	6811.02	6487.59	5364.25	2190.4
1964.69	4582.3	7350.68	2384.93	6799.14	6483.62	5520.13	2038.63
1966.69	4902.2	7409.82	2851.16	6786.07	6503.29	5690.51	1837.13
1968.69	5159.83	7452.91	3372.37	6772.62	6561.82	5863.91	1623.37
1970.69	5357.36	7496.36	3872.32	6765.3	6651.34	6028.53	1430.47
1972.68	5504.34	7533.27	4347.05	6769.11	6762.61	6183.28	1258.37
1974.68	5617	7569.54	4790.5	6784.45	6899.22	6332.14	1111.91
1976.68	5715.67	7592.67	5206.98	6810.94	7054.71	6476.19	985.21
1978.68	5824.59	7597.89	5594.12	6846.35	7238.75	6620.34	876.849
1980.68	5951.7	7593.58	5935.91	6879.78	7449.48	6762.09	793.26
1982.68	6106.13	7577.78	6233.02	6905.46	7613.12	6887.1	714.532
1984.68	6270.41	7555.63	6490.04	6931.54	7706.87	6990.9	633.446
1986.68	6427.69	7521.85	6695.15	6965.65	7724.89	7067.05	547.029
1988.67	6573.13	7456.42	6841.47	7017.49	7668.66	7111.44	447.491
1990.67	6707.83	7339.79	6935.73	7072.77	7554.9	7122.21	332.975
1992.67	6834.31	7187.7	6991.26	7119.72	7399.73	7106.54	212.201
1994.67	6953.71	7009.59	7026.01	7159.07	7222.2	7074.12	111.939
1996.67	7064.34	6816.41	7052.41	7192.61	7060.24	7037.2	136.38
1998.67	7150.83	6627.33	7080.43	7232.53	6963.74	7010.97	236.054
2000.67	7212.37	6489.16	7117.6	7287.95	6920.16	7005.45	319.776
2002.66	7250.11	6418.18	7164.08	7369.66	6875.54	7015.51	380.437
2004.66	7269.28	6365.17	7216.34	7453.33	6809.36	7022.7	436.347
2006.66	7267.5	6327.16	7273.08	7549.14	6711.8	7025.74	495.01
2008.66	7250.41	6288.03	7331.77	7667.93	6585.58	7024.75	568.877
2010.66	7216.06	6247.84	7389.25	7820.46	6441.83	7023.09	660.681
2012.66	7146.3	6199.32	7445.66	8000.03	6290.38	7016.34	768.666
2014.66	7033.2	6144.4	7494.44	8153.41	6149.45	6994.98	870.532
2016.66	6873.67	6084.22	7524.29	8236.87	6047.17	6953.24	942.905
2018.65	6659.48	6014.93	7520.85	8249.17	6010.23	6890.93	979.566
2020.65	6390.11	5929.54	7483.48	8183.17	6056.64	6808.59	982.119
2022.65	6061.56	5825.5	7418.09	8033.69	6176.08	6702.98	967.107
2024.65	5684.92	5703.42	7330.42	7806.38	6352.78	6575.59	960.238
2026.65	5277.66	5561.15	7227.36	7509.3	6589.19	6432.93	988.531
2028.65	4853.87	5411.38	7120.73	7172.29	6887.1	6289.07	1079.3
2030.65	4442.21	5263.32	7017.42	6837.58	7213.26	6154.76	1230.68
2032.64	4067.3	5132.88	6922.95	6540.11	7534.6	6039.57	1412.26
2034.64	3689.32	5045.2	6814.19	6308.68	7811.56	5933.79	1602.26
2036.64	3349.57	5042.26	6679.93	6106.51	8008.44	5837.34	1754.79
2038.64	3083.06	5172.89	6517.58	5952.03	8110.09	5767.13	1846.9
2040.64	2910.69	5488.91	6322.88	5871.18	8103.64	5739.46	1871.62
2042.64	2836.21	5909.73	6092.51	5899.1	7978.82	5743.28	1845.44
2044.64	2875.39	6354.89	5831.97	6068.12	7739.29	5773.93	1781.26
2046.64	2973.99	6799.31	5554.9	6261.37	7393.21	5796.56	1717.27
2048.63	3144.82	7212.33	5295.32	6438.26	6958.76	5809.9	1662
2050.63	3410.06	7579.7	5104.45	6596.36	6479.38	5833.99	1616.55
2052.63	3774.52	7884.89	5027.04	6734.67	6032.5	5890.72	1575.86
2054.63	4232.04	8112.24	5117.6	6852.6	5719.26	6006.75	1514.22
2056.63	4766.09	8251.3	5335.62	6957.88	5616.67	6185.51	1407.54
2058.63	5288.57	8301.9	5645.47	7059.12	5492.25	6357.46	1291.43
2060.63	5742.91	8280.62	6016.99	7148.87	5369.33	6511.74	1191.2
2062.62	6125.6	8200.88	6374.07	7227.81	5313.22	6648.32	1104.22
2064.62	6431.8	8072.29	6706.34	7301.74	5321.65	6766.76	1024.06
2066.62	6663.48	7898.2	7008.28	7381.07	5380.22	6866.25	948.623
2068.62	6829.12	7710.95	7274.73	7476.69	5480.07	6954.31	885.593
2070.62	6944.72	7543.1	7514.5	7599.5	5615.65	7043.49	840.996
2072.62	7034.93	7392.5	7722.56	7750.06	5768.48	7133.71	816.579
2074.62	7114.36	7277.12	7895.84	7910.68	5933.68	7226.33	806.636
2076.62	7188.66	7207.08	8043.63	8073.02	6093.31	7321.14	810.161
2078.61	7276.53	7195.14	8179.77	8217.07	6234.56	7420.61	819.909
2080.61	7321.51	7258.79	8315.56	8327.83	6336.42	7512.02	835.716
2082.61	7275.7	7406.1	8454.52	8402.76	6394.97	7586.81	861.483
2084.61	7144.97	7644.23	8599.97	8446.94	6427.37	7652.7	906.564
2086.61	6916.8	7956.12	8739.81	8454.73	6462.53	7706	982.467
2088.61	6605.28	8247.82	8864.44	8438.1	6503.18	7731.76	1098.47
2090.61	6213.23	8456.46	8950.3	8416.84	6539.24	7715.21	1245.6
2092.6	5770.03	8568.68	8975.87	8403.97	6562.21	7656.15	1404.26
2094.6	5337.44	8574.39	8943.35	8399.01	6558.84	7562.61	1548.27
2096.6	4987.34	8466.84	8854.81	8401.71	6537.24	7449.59	1644.01
2098.6	4790.68	8244.91	8720.6	8388.04	6492.54	7327.35	1661.3
2100.6	4856.69	7938.83	8545.57	8323.41	6428.7	7218.64	1557.46
2102.6	5226.57	7560.54	8340.88	8195.15	6348.41	7134.31	1324.76
2104.6	5515.2	7134.4	8120.32	8010.38	6269.84	7010.03	1121.53
2106.6	5824.37	6723.3	7894.4	7796.05	6201.01	6887.83	931.1
2108.59	6034.93	6412.75	7643.45	7569.41	6162.45	6764.6	780.849
2110.59	6218.32	6163.64	7353.59	7341.45	6153.7	6646.14	640.756
2112.59	6343.49	5950.56	6997.68	7129.78	6184.23	6521.15	516.76
2114.59	6393.6	5784.18	6554.36	6959.71	6266.1	6391.59	428.353
2116.59	6391.56	5682.67	6021.37	6843.14	6403.77	6268.5	438.157
2118.59	6337.13	5654.87	5409.9	6714.99	6563.72	6136.12	573.876
2120.59	6255.95	5681.23	4768.14	6521.71	6718.09	5989.02	786.103
2122.58	6162.11	5762.46	4175.94	6244.09	6849.64	5838.85	1007.66
2124.58	6061.32	5886.36	3738.99	5875.79	6957.7	5704.03	1185.69
2126.58	5991.94	6042.32	3594.37	5414.06	7024.04	5613.35	1268.2
2128.58	5977.66	6206.94	3836.77	4855.05	7050.66	5585.42	1252.83
2130.58	5982.21	6338.47	4190.92	4227.01	7031.39	5554	1284.55
2132.58	5983.21	6416.87	4634.41	3569.56	6972.56	5515.32	1389
2134.58	5977.43	6445.64	5104.3	2913.53	6891	5466.38	1573.04
2136.58	5971.83	6444.65	5589.09	2290.25	6788.01	5416.76	1806.22
2138.57	5974.28	6437.32	6078.4	1769.78	6683.17	5388.59	2042.69
2140.57	5993.33	6440.82	6565.91	1425.96	6587.7	5402.75	2235.97
2142.57	6027.38	6458.67	7038.69	1165.3	6517.12	5441.43	2417.22
2144.57	6066.1	6471.5	7477.86	955.13	6476.38	5489.39	2587.7
2146.57	6070.55	6475.59	7876.39	793.248	6440.92	5531.34	2736.72
2148.57	6034.48	6469.76	8218.86	673.723	6402.08	5559.78	2859.51
2150.57	5964.21	6451.01	8492.8	603.597	6357.51	5573.83	2947.86
2152.56	5864.63	6415.06	8704.57	586.297	6303.75	5574.86	3000.09
2154.56	5734.93	6366.98	8862.92	628.541	6238.25	5566.33	3015.39
2156.56	5579.89	6308.7	8982.35	739.166	6165.32	5555.08	2995
2158.56	5401.15	6241.4	9079.1	921.333	6087.65	5546.13	2943.99
2160.56	5189.98	6175.41	9162.59	1176.95	6003.63	5541.71	2867.95
2162.56	4946.73	6133.44	9244.95	1497.53	5911.13	5546.76	2779.83
2164.56	4673.99	6154.88	9337.63	1795.61	5820.99	5556.62	2722.5
2166.56	4378.05	6287.91	9420.39	2079.2	5738.37	5580.78	2691.43
2168.55	4075.03	6586.65	9472.48	2350.86	5677.52	5632.51	2685.74
2170.55	3794.84	6947.35	9489.58	2592.02	5649.06	5694.57	2702.24
2172.55	3561.15	7300.33	9474.21	2783.09	5665.49	5756.85	2732.85
2174.55	3390.44	7632	9435.95	2906.19	5743.23	5821.56	2772.97
2176.55	3275.75	7939.11	9381.67	2940.46	5886.88	5884.77	2825.09
2178.55	3216.97	8223.28	9318.2	2875.15	6067.64	5940.25	2891.8
2180.55	3215.12	8491.5	9250.65	2707.75	6244.97	5982	2976.04
2182.54	3269.33	8722.69	9177.1	2448.69	6390.71	6001.7	3071.16
2184.54	3358.26	8855.07	9102.59	2119.53	6493.29	5985.75	3164.52
2186.54	3450.13	8875.93	9035.73	1748.44	6543.54	5930.75	3253.29
2188.54	3542.74	8780.17	8994.83	1396.99	6544.58	5851.86	3320.81
2190.54	3646.23	8572.77	8990.35	1150.49	6500.39	5772.05	3339.53
2192.54	3768.07	8264.3	9036.08	1032.78	6414.02	5703.05	3306.44
2194.54	3916.64	7857.6	9129.42	1031.75	6301.7	5647.42	3230.22
2196.54	4102.14	7380.1	9255.08	1121.4	6163.22	5604.39	3128.38
2198.53	4325.04	6882.8	9391.33	1303.84	6010.28	5582.66	3011.19
2200.53	4584.45	6374.63	9513.74	1586.3	5858.16	5583.46	2877.67
2202.53	4857.26	5949.84	9600.81	1948.39	5737.5	5618.76	2740.07
2204.53	5113.44	5719.86	9645.78	2337.06	5643.05	5691.84	2608.92
2206.53	5358.54	5723.02	9644.98	2769.3	5579.77	5815.12	2460.55
2208.53	5590.07	5809.65	9599.82	3256.99	5559.3	5963.17	2284.43
2210.53	5804.84	5934.54	9517.22	3809.57	5594.33	6132.1	2078.97
2212.52	5994.85	6055.8	9411.38	4428.01	5681.66	6314.34	1851.96
2214.52	6140.43	6149.11	9300.86	5117.21	5810.97	6503.72	1618.95
2216.52	6227.15	6207.77	9214.44	5857.04	5968.1	6694.9	1417.25
2218.52	6247.28	6225.29	9186.34	6592.54	6127.35	6875.76	1303.57
2220.52	6200.52	6207.49	9238.7	7247.74	6277.9	7034.47	1309.19
2222.52	6088.61	6172.11	9335.61	7804.66	6421.06	7164.41	1398.09
2224.52	5910.74	6134.89	9449.43	8263.55	6562.31	7264.18	1530.83
2226.52	5673.56	6104.08	9533.58	8622.39	6690.44	7324.81	1671.94
2228.51	5399.51	6094.45	9566.69	8881.07	6798.42	7348.03	1798.81
2230.51	5105.86	6134.07	9548.34	9045.82	6878.85	7342.59	1900.32
2232.51	4824.76	6197.7	9467.67	9132.51	6919.59	7308.45	1971.24
2234.51	4579.43	6264.47	9336.55	9160.66	6918.05	7251.83	2013.56
2236.51	4429.23	6347.84	9175.31	9143.27	6874.15	7193.96	2011.69
2238.51	4421.17	6452.31	8987.62	9104.55	6791.04	7151.34	1953.15
2240.51	4609.14	6582.07	8787.2	9074.93	6675.03	7145.67	1829.6
2242.5	4906.83	6737.01	8599.92	9060.61	6529.28	7166.73	1683.67
2244.5	5198.78	6917.89	8417.68	8995.98	6360.29	7178.12	1540.74
2246.5	5470.08	7113.23	8232.52	8891.98	6167.57	7175.07	1413.49
2248.5	5715.44	7304.87	8040.44	8764.35	5945.19	7154.06	1316.47
2250.5	5928.83	7475.76	7822.86	8634.22	5700.64	7112.46	1259.63
2252.5	6097.74	7616.63	7545.25	8521.21	5444.34	7045.04	1246.55
2254.5	6210.16	7725.8	7189.92	8464.04	5182.77	6954.54	1286.67
2256.5	6268.14	7808.03	6757.53	8480.34	4949.52	6852.71	1372.47
2258.49	6282.97	7871.18	6243.92	8575.71	4767.82	6748.32	1499.46
2260.49	6280.94	7914.95	5661.24	8755.26	4668.38	6656.15	1663.79
2262.49	6271.32	7946.71	5023.83	8948.19	4677.07	6573.42	1844.87
2264.49	6281.83	7968.79	4341.56	9094.24	4816.96	6500.68	2026.48
2266.49	6346.16	7995.49	3653	9182.08	5032.81	6441.91	2218.95
2268.49	6485.47	8025.89	3016.53	9218.31	5249.85	6399.21	2416.84
2270.49	6655.44	8054.72	2500.37	9198.08	5456.74	6373.07	2584.85
2272.49	6813.46	8075.22	2165.75	9125.15	5654.49	6366.81	2687.14
2274.48	6942.61	8092.9	1977.96	9016.63	5839.39	6373.9	2732.78
2276.48	7024.34	8102.54	1775.16	8879.78	6016.01	6359.56	2782.36
2278.48	7058.84	8100.46	1563.78	8730.08	6184.14	6327.46	2835.68
2280.48	7049.07	8086.52	1372.45	8605.26	6343.4	6291.34	2887.44
2282.48	7006.01	8066.02	1247.72	8547.96	6503.32	6274.21	2925.5
2284.48	6944.86	8048.52	1240.24	8537.16	6660.15	6286.19	2924.38
2286.48	6876.08	8038.86	1371.16	8521.79	6825.66	6326.71	2866.1
2288.47	6813.03	8030.58	1668.38	8514.17	6989.95	6403.22	2740.22
2290.47	6781.19	8023.32	2104.96	8499.9	7138.8	6509.64	2555.54
2292.47	6803.53	8012.76	2687.22	8463.6	7263.58	6646.14	2304.88
2294.47	6850.28	7996.53	3346.01	8399.59	7351.26	6788.73	2014.09
2296.47	6927.13	7952.76	3979.21	8317.04	7389.39	6913.11	1723.86
2298.47	7025.19	7877.62	4574.36	8233.7	7365.83	7015.34	1441.29
2300.47	7137.54	7764.3	5129.94	8167.94	7269.33	7093.81	1171.84
2302.47	7255.66	7615.17	5660.78	8124.02	7106.95	7152.52	921.392
2304.46	7343.54	7443.18	6190.65	8099.59	6883.47	7192.09	708.459
2306.46	7364.78	7265.79	6740.95	8097.23	6601.74	7214.1	592.482
2308.46	7302.07	7115.83	7332.7	8108.23	6277.42	7227.25	653.343
2310.46	7150.19	7045.13	7983.89	8132.36	5937.07	7249.73	879.329
2312.46	6910.75	7099.36	8694.14	8155.62	5609.88	7293.95	1196.22
2314.46	6589.67	7252.77	9442.9	8182.25	5315.97	7356.71	1565.05
2316.46	6188.61	7409.99	10215.8	8219.54	5068.12	7420.41	1968.73
2318.45	5734.92	7563.59	10946.6	8271.98	4867.37	7476.89	2372.9
2320.45	5279	7704.1	11609	8343.61	4725.74	7532.3	2750.53
2322.45	4884.34	7808.34	12204.2	8414.63	4657.27	7593.76	3079.77
2324.45	4617.5	7853.92	12736.8	8454.81	4679.05	7668.42	3338.63
2326.45	4537.09	7845	13185.7	8463.66	4777.62	7761.81	3507.92
2328.45	4575.26	7787.29	13519.1	8450.7	4930.7	7852.61	3596.85
2330.45	4640.99	7686.72	13722.2	8420.16	5077.9	7909.58	3633.13
2332.45	4721.14	7543.66	13775.2	8380.58	5205	7925.13	3613.91
2334.44	4814.03	7369.87	13670.8	8344.37	5308.6	7901.53	3536.2
2336.44	4924.38	7175.38	13409.6	8325.79	5389.45	7844.93	3398.69
2338.44	5042.45	6982.17	12989.9	8332.78	5449.7	7759.41	3201.87
2340.44	5162.34	6744.69	12432.6	8357.58	5491.56	7637.76	2959.74
2342.44	5283.62	6454.03	11783.4	8395.28	5521.12	7487.49	2695.86
2344.44	5413.9	6114.38	11123.2	8442.14	5535.24	7325.76	2449.25
2346.44	5553.33	5734.34	10551.9	8494	5523.87	7171.49	2267.97
2348.43	5697.49	5329.79	10246.3	8534.69	5486.29	7058.91	2216.63
2350.43	5829.1	4935.82	10058.2	8539.46	5419.97	6956.5	2227.17
2352.43	5945.9	4608.63	9910.72	8504.7	5328.73	6859.74	2250.61
2354.43	6049.06	4431.13	9778.81	8417.11	5226.48	6780.52	2243.76
2356.43	6141.73	4476.63	9691.18	8280.94	5126.04	6743.31	2189.15
2358.43	6227.32	4776.12	9618.3	8098.34	5021.38	6748.29	2073.8
2360.43	6309.23	5243.54	9559.46	7874.19	4918.22	6780.93	1934.63
2362.43	6382.36	5700.49	9515.28	7621.83	4821.28	6808.25	1826.64
2364.42	6449.11	6118.28	9476.9	7367.29	4747.56	6831.83	1752.35
2366.42	6512.71	6491.35	9438.37	7140.13	4719.49	6860.41	1700.35
2368.42	6566.51	6808.36	9394.81	6962.95	4759.84	6898.49	1652.87
2370.42	6621.65	7060.49	9345.83	6818.11	4892.75	6947.76	1589.78
2372.42	6686.62	7245.88	9305.62	6702.84	5118.01	7011.79	1508.65
2374.42	6764.45	7368.64	9277.48	6629.71	5379.86	7084.03	1423.46
2376.42	6856.19	7413.55	9261.28	6603.61	5665.15	7159.96	1333.8
2378.41	6942.24	7395.15	9264.1	6604.21	5953.03	7231.75	1251.99
2380.41	7019.97	7337.96	9277.69	6609.17	6226.67	7294.29	1185.35
2382.41	7062.97	7248.83	9265.61	6620.35	6467.35	7333.02	1126.08
2384.41	7062.63	7147.63	9218.03	6641.28	6668.59	7347.63	1070
2386.41	7019.99	7064.61	9113.11	6666.01	6828.02	7338.35	1004.81
2388.41	6938.99	7004.3	8919.07	6670.18	6956.16	7297.74	915.7
2390.41	6821.66	6952.78	8639.93	6633.13	7070.73	7223.65	808.225
2392.41	6675.49	6908.52	8271.23	6545.01	7189.14	7117.88	689.748
2394.4	6518.36	6878.9	7830.22	6418.8	7324.03	6994.06	587.05
2396.4	6373.98	6876.85	7361.31	6278.81	7490.25	6876.24	552.602
2398.4	6264.84	6915.51	6835.97	6127.61	7687.91	6766.37	619.649
2400.4	6208.22	7012.27	6298.14	5985.32	7901.19	6681.03	783.049
2402.4	6167.54	7178.01	5827.99	5867.65	8115.74	6631.38	993.226
2404.4	6115.68	7346.85	5522.33	5711.49	8320.58	6603.39	1194.1
2406.4	6057.88	7477.46	5467.84	5514.5	8505.59	6604.65	1337.45
2408.39	6008.16	7566.64	5718.92	5276.13	8671.08	6648.19	1422.27
2410.39	5981.06	7617.96	6035.91	5004.86	8809.66	6689.89	1510.31
2412.39	5984.95	7637.55	6406.1	4715.17	8919.87	6732.73	1607.69
2414.39	6033.31	7634.86	6794.64	4440.93	8996.1	6779.97	1708.14
2416.39	6117.96	7615.67	7196.88	4193.18	9027.5	6830.24	1805.6
2418.39	6202.65	7588.47	7618.16	3961.4	9003.83	6874.9	1906.2
2420.39	6254.31	7567.01	8049.3	3777.59	8935.7	6916.78	2004.67
2422.39	6261.9	7570.68	8476.61	3687.95	8832.63	6965.95	2084.06
2424.38	6230.34	7592.51	8884.3	3701.83	8704.81	7022.76	2137.51
2426.38	6161.52	7626.86	9256.96	3822.19	8574.82	7088.47	2163.87
2428.38	6070.89	7678.09	9563.18	4068.84	8463.54	7168.91	2149.65
2430.38	5977.15	7743.06	9794.18	4469.63	8392.35	7275.28	2083.77
2432.38	5880.04	7813.54	9947.16	5008.09	8342.59	7398.28	1973.51
2434.38	5792.45	7838.06	10027.8	5639.11	8298.84	7519.25	1838.42
2436.38	5726.14	7795.41	10049.8	6234.44	8247.03	7610.56	1720.01
2438.37	5690.06	7674.1	10034.5	6778.48	8182.81	7671.99	1625.48
2440.37	5691.7	7465.45	9996.32	7254.16	8107.05	7702.94	1559.31
2442.37	5735.88	7174.85	9946.49	7645.11	8023.05	7705.08	1523.77
2444.37	5843.07	6806.29	9911.26	7928.73	7936.2	7685.11	1520.16
2446.37	6014.24	6386.29	9897.26	8070.1	7857.52	7645.08	1544.53
2448.37	6238.83	5963.17	9851.34	8073.08	7798.19	7584.92	1570.23
2450.37	6448	5625.51	9769.44	7923.62	7776.13	7508.54	1583.2
2452.37	6605.77	5467.85	9662.36	7603.2	7812.14	7430.26	1556.34
2454.36	6691.42	5556.98	9537.64	7115.21	7921.5	7364.55	1484.51
2456.36	6694.04	5668.25	9414.84	6470.65	8042.07	7257.97	1477.5
2458.36	6603.22	5789.3	9302.47	5712.85	8151.91	7111.95	1568.88
2460.36	6415.1	5908.96	9221.21	4909.09	8241.39	6939.15	1757.89
2462.36	6129.4	6030.76	9194.24	4152.77	8303.43	6762.12	2002.17
2464.36	5749.29	6152.78	9181.77	3615.54	8337.05	6607.28	2208.7
2466.36	5297.08	6265.88	9163.56	3409.6	8332.52	6493.73	2318.67
2468.35	4807.4	6365.93	9129.91	2883.49	8281.81	6293.71	2541.68
2470.35	4323.62	6441.95	9083.9	2362.64	8165.83	6075.59	2757.2
2472.35	3873.54	6490.15	9032.99	2150.04	7950.99	5899.54	2852.16
2474.35	3477.29	6497.08	8982.54	1783.58	7608.98	5669.89	2971.91
2476.35	3181.4	6463.97	8936.24	1522.71	7130.15	5446.89	3023.86
2478.35	3033.29	6403.32	8890.7	1292.33	6511.88	5226.31	3031.14
2480.35	3057.52	6316.07	8831.63	1054.44	5774.03	5006.74	3014.67
2482.35	3215.89	6204.29	8735.88	886.254	4969.05	4802.27	2971.47
2484.34	3406.86	6075.96	8590.26	741.159	4185.35	4599.92	2940.53
2486.34	3630.11	5933.9	8379.92	582.185	3552.15	4415.65	2918.85
2488.34	3887.8	5774.86	8104.57	477.508	3234.28	4295.8	2853.37
2490.34	4179.27	5592.03	7771.67	386.907	3335.71	4253.12	2737.13
2492.34	4497.2	5367.63	7385.86	309.789	3664.32	4244.96	2598.65
2494.34	4829.93	5084.81	6975.46	247.846	4174.09	4262.43	2474.04
2496.34	5164.64	4734.33	6581.05	202.439	4712.45	4278.98	2402.98
2498.33	5488.94	4328.62	6267.29	162.754	5244.63	4298.45	2413.18
2500.33	5804.86	3906.28	6110.61	131.886	5772.91	4345.31	2511.49
2502.33	6113.11	3507.07	6184.27	106.551	6273.58	4436.91	2685.74
2504.33	6404.74	3195.12	6408.48	85.1167	6736.07	4565.91	2891.47
2506.33	6670.85	3019.83	6624.28	68.9309	7152.91	4707.36	3077.07
2508.33	6900.97	3004.44	6836.26	55.7158	7512.7	4862.02	3226.15
2510.33	7097.15	3134.58	7043.75	44.3669	7812.56	5026.48	3336.17
2512.33	7255.7	3324.37	7252.83	36.2056	8043.24	5182.47	3417.06
2514.32	7388.88	3564	7464.32	28.922	8205.5	5330.32	3474.3
2516.32	7510.4	3850.45	7677.79	22.9413	8307.11	5473.74	3513.55
2518.32	7621.09	4193.88	7897	18.9912	8365.09	5619.21	3540.12
2520.32	7696.16	4590.38	8125.6	14.9643	8393.93	5764.21	3558.64
2522.32	7727.66	5030.02	8366.17	11.659	8407.23	5908.55	3575.53
2524.32	7725.87	5494.13	8619.66	9.22767	8411.57	6052.09	3598.22
2526.32	7698.1	5979.53	8875.92	6.92606	8390.69	6190.23	3626.51
2528.31	7643.61	6478.82	9110.72	5.19647	8351.04	6317.88	3659.48
2530.31	7563.89	6981.77	9313.16	4.24406	8301	6432.81	3697.76
2532.31	7458.68	7464.64	9471.55	3.14909	8249.26	6529.46	3739.8
2534.31	7331.3	7878.8	9569.83	2.73626	8218.43	6600.22	3779.33
2536.31	7180.47	8201.34	9602.52	1.97656	8224.48	6642.16	3810.52
2538.31	7000.59	8419.8	9583.76	1.54622	8267.96	6654.73	3830.2
2540.31	6793.86	8534.62	9527.28	1.46126	8328.43	6637.13	3836.36
2542.31	6560.61	8560.43	9452.72	1.42992	8410.04	6597.05	3834.06
2544.3	6305.68	8521.05	9373.93	1.16256	8512.68	6542.9	3829.44
2546.3	6040.57	8443.35	9316.48	1.26743	8645.41	6489.41	3832.62
2548.3	5789.19	8336.49	9285.39	1.2062	8809.06	6444.27	3846.65
2550.3	5573.52	8233.05	9271.26	1.19419	8969.61	6409.73	3867.64
2552.3	5389.77	8171.87	9272.47	0.95883	9099.68	6386.95	3893.79
2554.3	5237.96	8147.6	9283.35	0.61818	9179.24	6369.75	3917.58
2556.3	5121.16	8151.31	9279.92	0.07979	9206.53	6351.8	3931.3
2558.29	5039.98	8168.13	9256	0.255	9185.29	6329.93	3931.37
2560.29	4975.6	8188.21	9209.8	0.31093	9123.87	6299.56	3919.4
2562.29	4910.64	8186.76	9135.17	0.59623	9028.65	6252.36	3893.75
2564.29	4834.05	8160.66	9022.36	0.86978	8911.34	6185.86	3855.36
2566.29	4734.86	8112.94	8868.11	0.86026	8792.66	6101.89	3808.8
2568.29	4614.56	8048.85	8674.79	0.91784	8687.57	6005.34	3757.78
2570.29	4473.2	7972.09	8455.25	1.07693	8605.09	5901.34	3707.2
2572.29	4316.27	7897.22	8223.44	1.28132	8547.03	5797.05	3662.11
2574.28	4155.12	7845.18	8007.07	1.56435	8508.15	5703.42	3628.67
2576.28	3998.93	7812.85	7839.57	1.50763	8498.87	5630.35	3613.09
2578.28	3866.46	7762.32	7751.44	1.48967	8501.2	5576.58	3607.87
2580.28	3776.25	7694.08	7684.56	3.69903	8503.14	5532.35	3597.94
2582.28	3740.17	7625.26	7643.55	12.9983	8503.33	5505.06	3582.44
2584.28	3790.58	7560.82	7629.91	33.7972	8505.35	5504.09	3557.28
2586.28	3965.83	7512.87	7642.56	72.1958	8516.23	5541.94	3519.44
2588.27	4223.45	7495.88	7676.6	136.744	8530.6	5612.65	3472.62
2590.27	4468.31	7507.32	7715.87	233.418	8559.75	5696.93	3424.5
2592.27	4705.66	7549.26	7753.31	369.946	8606.76	5796.99	3370.32
2594.27	4936.18	7592.13	7774.9	549.968	8669.09	5904.45	3301.44
2596.27	5160.95	7621.43	7784.97	775.235	8717.81	6012.08	3209.48
2598.27	5382.26	7622.05	7793.2	1041.6	8733.18	6114.46	3091.06
2600.27	5607.61	7599.18	7815.23	1299.32	8720.65	6208.4	2970.17
2602.27	5837.62	7552.04	7859.59	1502.43	8672.54	6284.85	2866.1
2604.26	6068.75	7491.15	7936.82	1650.68	8582.91	6346.06	2782.48
2606.26	6294.56	7412.08	8008.79	1767.46	8453	6387.18	2706.39
2608.26	6516.1	7318.65	8057.65	1869.43	8281.92	6408.75	2630.23
2610.26	6736.39	7214.24	8081.03	2025.17	8086.12	6428.59	2528.84
2612.26	6955.23	7094.54	8074.39	2259.46	7879.78	6452.68	2393.44
2614.26	7163.08	6934.3	8024.21	2554.2	7669.47	6469.05	2229.56
2616.26	7353.34	6728.77	7923.93	2878.07	7480.44	6472.91	2054.51
2618.25	7525.27	6481.59	7780.55	3202.23	7332.54	6464.43	1887.69
2620.25	7670.94	6211.89	7605.69	3505.98	7241.39	6447.18	1744.74
2622.25	7787.97	5951.7	7426.38	3834.73	7194.87	6439.13	1611.34
2624.25	7871.43	5748.28	7289.82	4220.09	7195.99	6465.12	1478.68
2626.25	7916.73	5640.71	7257.15	4703.01	7241.27	6551.77	1330.79
2628.25	7913.73	5621.02	7311.99	5287.16	7336.61	6694.1	1163.3
2630.25	7865.22	5586.81	7377.06	5925.55	7474.76	6845.88	1018.45
2632.25	7762.55	5507.46	7449.53	6602.21	7629.35	6990.22	944.069
2634.24	7601.26	5378.1	7531.72	7265.8	7768.48	7109.07	984.444
2636.24	7380.37	5196.31	7622.56	7878.16	7880.54	7191.59	1134.52
2638.24	7101.51	4986.17	7717.95	8431.43	7968.28	7241.07	1348.82
2640.24	6765.36	4772.97	7818.41	8917.51	8042.44	7263.34	1589.13
2642.24	6376.88	4585.72	7927.82	9356.8	8116.12	7272.67	1837.55
2644.24	5929.2	4451.16	8038.09	9770.76	8212.88	7280.42	2090.21
2646.24	5411.72	4420.56	8142.47	10183.5	8342.75	7300.2	2343.53
2648.23	4821.82	4556.57	8237.24	10616.6	8519.12	7350.28	2599.03
2650.23	4185.03	4773.83	8313.55	11090.1	8735.32	7419.56	2892.46
2652.23	3520.88	5066.54	8382.11	11588.1	8954.06	7502.34	3215.59
2654.23	2864.03	5463.95	8443.36	12054.1	9169.74	7599.04	3535.76
2656.23	2252.9	5946.04	8499.93	12478.9	9378.38	7711.23	3841.92
2658.23	1753.74	6446.41	8554.41	12833.4	9579.53	7833.5	4106.54
2660.23	1432.8	6948.33	8619.25	13099.2	9766.99	7973.32	4293.56
2662.23	1160.86	7428.96	8703.03	13259.3	9927.26	8095.89	4441.94
2664.22	922.743	7867.11	8808.23	13323.4	10053.9	8195.07	4558.66
2666.22	735.085	8241.56	8937.54	13319.8	10143.6	8275.53	4643.08
2668.22	594.47	8538.95	9086.6	13274.6	10197.2	8338.36	4700.79
2670.22	494.488	8758.75	9241.86	13209.5	10226.7	8386.27	4738.19
2672.22	441.256	8911.41	9393.64	13167.3	10251.7	8433.06	4762.9
2674.22	444.496	9010.14	9529.37	13107.9	10288.7	8476.11	4760.26
2676.22	519.35	9073.38	9616.94	13008.1	10358.5	8515.26	4718.14
2678.21	684.101	9107.6	9650.32	12864.5	10477.9	8556.89	4629.41
2680.21	957.528	9137.94	9635.72	12682.8	10666.7	8616.15	4491.91
2682.21	1356.92	9189.15	9591.16	12470.3	10894.4	8700.38	4300.71
2684.21	1894.59	9241.76	9523.31	12233.3	11100.9	8798.77	4046.13
2686.21	2547.55	9297.08	9448.13	11996.5	11271.9	8912.24	3742.5
2688.21	3236.87	9341.82	9386.81	11767.4	11399.1	9026.4	3423.85
2690.21	3935.41	9362.16	9354.24	11547.5	11477	9135.27	3100.03
2692.21	4606.54	9363.98	9328.5	11327.8	11503	9225.96	2782.59
2694.2	5241.89	9361.09	9302.01	11119.9	11483.3	9301.63	2477.43
2696.2	5824.18	9357.36	9281.51	10949.7	11427.5	9368.04	2197.12
2698.2	6336.48	9349.1	9268.06	10837.3	11336.5	9425.5	1950.51
2700.2	6768.91	9308.85	9256.96	10774.5	11217.9	9465.42	1740.97
2702.2	7105.89	9217.34	9236.71	10728.5	11083.7	9474.43	1572.82
2704.2	7336.53	9069.02	9169.28	10695.1	10898.7	9433.73	1443.82
2706.2	7454.34	8860.25	9036.82	10665.7	10652.8	9333.97	1356.32
2708.19	7461.12	8579.56	8824.61	10619.2	10341.6	9165.22	1309.67
2710.19	7364.22	8227.66	8536.63	10555.6	9968.72	8930.56	1305.86
2712.19	7175.06	7814.21	8173.01	10482.5	9543.6	8637.68	1346.98
2714.19	6896.33	7376.28	7744.44	10406.8	9083.31	8301.43	1430.42
2716.19	6544.81	6969.51	7280.46	10336.6	8597.52	7945.78	1541.04
2718.19	6156.22	6658.07	6820.1	10267.5	8075.24	7595.43	1652.38
2720.19	5793.32	6451.62	6405.42	10200.5	7471.68	7264.5	1748.28
2722.19	5522.77	6363.01	6076.67	10118.2	6789.39	6974.01	1816.93
2724.18	5370.36	6412.26	5866.68	10012.9	6027.89	6738.02	1868.49
2726.18	5341.3	6583.54	5821.58	9896.68	5203.59	6569.34	1936.74
2728.18	5344.57	6787.45	5997.94	9769.97	4355.28	6451.04	2058.53
2730.18	5349.64	6941.24	6436.31	9638.78	3533.17	6379.83	2241.87
2732.18	5370.57	7029.46	7070	9511.92	2795.81	6355.55	2478.37
2734.18	5414.52	7048.38	7633.87	9396.51	2189.91	6336.64	2720.2
2736.18	5494.96	7003.81	8173.22	9298.84	1753.92	6344.95	2928.4
2738.17	5616.86	6910.25	8657.59	9224.45	1446.46	6371.12	3101.66
2740.17	5781.33	6796.77	9060.83	9186.85	1192.31	6403.62	3259.86
2742.17	5973.76	6685.46	9412.28	9175.39	994.384	6448.25	3400.33
2744.17	6183.82	6595.62	9703.41	9179.36	843.226	6501.09	3519.55
2746.17	6401.82	6543.04	9922.27	9203.78	737.171	6561.62	3613.35
2748.17	6616.28	6519.26	10074.6	9240.77	667.215	6623.62	3682.67
2750.17	6821.95	6530.87	10169.7	9277.76	629.678	6686	3727.44
2752.17	7010.53	6579.58	10228.3	9312.52	618.28	6749.83	3753.65
2754.16	7173.17	6648.25	10248.8	9329.32	614.176	6802.75	3765.59
2756.16	7305.56	6731.25	10240.8	9322.92	576.688	6835.44	3781.13
2758.16	7411.31	6822.68	10218.2	9274.14	524.42	6850.16	3793.09
2760.16	7488.2	6913.96	10150.1	9191.42	453.188	6839.38	3798.13
2762.16	7536.61	7010.31	10024.7	9086.21	362.961	6804.16	3796.3
2764.16	7559.98	7112.3	9841.23	8974.24	272.823	6752.12	3782.99
2766.16	7558.35	7215.84	9599.61	8860.15	214.772	6689.74	3746.15
2768.15	7539.28	7299.05	9318.01	8757.01	185.885	6619.85	3692.9
2770.15	7508.09	7348.64	9023.79	8671.37	158.733	6542.13	3640.87
2772.15	7462.77	7360.27	8754.91	8596.37	121.003	6459.06	3599.64
2774.15	7397.54	7338.67	8543.7	8535.72	97.2022	6382.57	3562.19
2776.15	7302	7298.93	8378.17	8463.74	79.3935	6304.45	3524.85
2778.15	7179.39	7242.62	8223.09	8376.27	64.6874	6217.21	3482.67
2780.15	7034.22	7173.08	8081.89	8272.63	51.2529	6122.61	3437.19
2782.15	6872.14	7098.39	7974.23	8154.3	42.0368	6028.22	3391.13
2784.14	6712.08	7029.33	7900.18	8026.27	33.7998	5940.33	3348.91
2786.14	6563.85	6981.64	7859.39	7890.55	26.9027	5864.47	3312.82
2788.14	6425.67	6968.58	7858.66	7733.72	21.9448	5801.72	3283.3
2790.14	6291.81	7001.88	7884.82	7558.08	17.627	5750.84	3261.42
2792.14	6176.05	7070.38	7929.79	7372.26	13.7437	5712.44	3248.3
2794.14	6076.93	7129.2	7991.46	7201.75	11.4752	5682.16	3242.24
2796.14	5972.87	7167.61	8053.88	7058.33	8.73575	5652.28	3240.11
2798.13	5862.25	7190.73	8119.3	6956.8	6.32127	5627.08	3243.17
2800.13	5751.73	7205.09	8156.5	6910.21	5.04772	5605.72	3246.34
2802.13	5640.93	7215.86	8153.88	6894.6	3.6166	5581.78	3245.34
2804.13	5537.19	7220.07	8118.5	6905.99	2.70681	5556.89	3240.27
2806.13	5444.09	7217.11	8066.28	6937.91	2.08234	5533.49	3233.67
2808.13	5363.99	7186.56	8008.44	6989.01	0.88302	5509.78	3225.38
2810.13	5279.15	7133.92	7951.82	7057.96	0.39714	5484.65	3217.2
2812.13	5190.23	7064.15	7891.05	7109.25	0.4919	5451.03	3204.76
2814.12	5103.53	6985.87	7821.58	7111.98	3.63798e-13	5404.59	3184.25
2816.12	5020.94	6915.9	7738.08	7077.67	0.13246	5350.54	3157.1
2818.12	4958.28	6875.71	7629.09	7016.98	-0.3648	5295.94	3125.14
2820.12	4925.92	6883.14	7465.68	6929.76	-0.66188	5240.77	3085.13
2822.12	4931.16	6947.79	7242.52	6823.04	-0.69608	5188.76	3040.55
2824.12	4966.49	7084.47	6954.93	6711.87	-0.37989	5143.48	2999.97
2826.12	5031.82	7269.99	6615.17	6605.07	-0.71142	5104.27	2970.34
2828.11	5129.26	7459.89	6231.52	6517.76	-0.23137	5067.64	2952.43
2830.11	5260.06	7646.24	5841.29	6476.98	-0.43552	5044.83	2956.09
2832.11	5409.64	7824.58	5499.3	6494.14	-0.63016	5045.4	2984.28
2834.11	5546.67	7981.17	5263.35	6557.41	-0.79061	5069.56	3027.57
2836.11	5679.97	8108.73	5174.98	6652.39	-0.79865	5123.05	3074.89
2838.11	5807.85	8213.18	5235.1	6757.56	-1.02459	5202.53	3119.56
2840.11	5923.13	8302.88	5430.37	6869.17	-0.84511	5304.94	3161.63
2842.11	6015.16	8398.14	5684.37	6980.64	-1.39941	5415.38	3206.26
2844.1	6076.83	8500.83	5964.59	7084.41	-1.41781	5525.05	3252.94
2846.1	6100.44	8604.89	6257.85	7171.5	-1.7382	5626.59	3299.93
2848.1	6089.23	8668.21	6554.85	7242.79	-1.61698	5710.69	3338.44
2850.1	6046.18	8622.96	6836.79	7310.04	-1.64879	5762.87	3355.48
2852.1	5985.41	8467.78	7098.73	7389.82	2.45643	5788.84	3353.23
2854.1	5919.98	8202.07	7319.98	7483.69	16.4676	5788.44	3330.84
2856.1	5859.27	7833.16	7495.28	7593.99	53.0944	5766.96	3288.28
2858.09	5826.69	7377.77	7627.12	7702.76	127.701	5732.41	3224.94
2860.09	5791.28	6841.23	7723.78	7800.19	261.351	5683.57	3138.26
2862.09	5750.92	6243.54	7797.7	7881.38	480.525	5630.81	3028.03
2864.09	5712.38	5591.5	7859.34	7923.47	814.653	5580.27	2890.22
2866.09	5686.39	4871.42	7910.35	7915.6	1292.78	5535.31	2728.06
2868.09	5686.37	4082.54	7945.15	7859.65	1939.42	5502.63	2562.63
2870.09	5708.88	3268.67	7964.94	7753.16	2766.86	5492.5	2431.3
2872.09	5748.51	2499.49	7961.84	7590.01	3707.64	5501.5	2382.55
2874.08	5804.63	1885.71	7919.14	7367	4692.93	5533.88	2405.17
2876.08	5877.88	1535.17	7838.48	7087.09	5621.28	5591.98	2440.41
2878.08	5966.73	1224.68	7713.51	6764.92	6464.97	5626.96	2541.97
2880.08	6039.53	963.349	7539.45	6402.34	7217.42	5632.42	2678.98
2882.08	6096.79	751.624	7299.2	6000.17	7870.71	5603.7	2826.53
2884.08	6130.49	577.147	6968.31	5553.5	8421.16	5530.12	2971.51
2886.08	6133.14	436.716	6527	5095.29	8869.76	5412.38	3105.36
2888.07	6104.68	322.302	5973.98	4689.26	9215.9	5261.22	3224.09
2890.07	6047.43	228.608	5319.2	4358.49	9466.91	5084.13	3327.71
2892.07	5969.21	154.981	4601.55	4162.34	9633.01	4904.22	3416.61
2894.07	5872.22	94.9745	3867.95	4177.11	9738.08	4750.07	3496.99
2896.07	5762.65	45.9781	3185.76	4466.34	9803.6	4652.86	3576.74
2898.07	5655.72	7.33749	2605.8	4812.2	9851.69	4586.55	3667.71
2900.07	5577.3	-19.0161	2204.73	5203.5	9890.88	4571.48	3754.37
2902.07	5520.18	-31.9031	2064.3	5612.29	9913.26	4615.63	3807.4
2904.06	5475.57	-25.0422	2089.04	6029.93	9913.26	4696.55	3830.52
2906.06	5441.36	5.52229	2266.74	6443.24	9883.28	4808.03	3819.54
2908.06	5416.44	70.4958	2607.8	6842.63	9808.73	4949.22	3765.05
2910.06	5407.57	179.776	3106.18	7226.98	9691.84	5122.47	3670.32
2912.06	5423.51	341.057	3656.01	7589.11	9535.21	5308.98	3552.67
2914.06	5449.19	563.459	4224.72	7930.15	9344.23	5502.35	3416.21
2916.06	5465.77	849.855	4786.04	8250.96	9123.94	5695.31	3265.15
2918.05	5470.32	1190.51	5286.45	8535.14	8887.6	5874	3106.72
2920.05	5452.85	1503.95	5723.88	8752.14	8656.03	6017.77	2967.21
2922.05	5408.98	1808.38	6091.66	8903.4	8435.34	6129.55	2837.43
2924.05	5333.14	2095.82	6384.17	8993.12	8228.88	6207.03	2717.87
2926.05	5223.55	2366.35	6604.19	9029.53	8059.58	6256.64	2610.65
2928.05	5082.77	2597.21	6762.65	9013.61	7946.74	6280.59	2523.88
2930.05	4919.2	2812.59	6870.27	8952.33	7915.45	6293.97	2451.44
2932.05	4733.4	3037.51	6943.29	8851.82	7980.8	6309.36	2390
2934.04	4534.89	3260.67	6992.74	8728.13	8080.74	6319.44	2339.76
2936.04	4337.81	3504.05	7040.97	8573.71	8186.03	6328.51	2287.98
2938.04	4148.69	3794.35	7090.68	8399.46	8276.43	6341.92	2226.93
2940.04	3975.86	4147.22	7130.1	8223.46	8342.06	6363.74	2154.91
2942.04	3788.77	4559.82	7167.05	8091.05	8370.43	6395.42	2093.76
2944.04	3574.83	4976.49	7212.19	8061.12	8360.48	6437.02	2077.47
2946.04	3329.36	5367.3	7265.2	8134.86	8307.9	6480.92	2113.11
2948.03	3048.56	5721.62	7329.54	8255.04	8227.07	6516.37	2194.77
2950.03	2726.18	6034.48	7381.95	8396.49	8131.96	6534.21	2317.89
2952.03	2365.25	6305.83	7418.01	8557.59	8031.35	6535.61	2477.35
2954.03	1971.62	6545.89	7440.8	8701.81	7937.75	6519.57	2660.2
2956.03	1569.71	6761.58	7464.44	8789.14	7875.36	6492.05	2847.71
2958.03	1197.16	6962.43	7501.5	8814.92	7865.01	6468.2	3022.99
2960.03	912.221	7140.96	7561.95	8768.55	7898.93	6456.52	3156.57
2962.03	727.935	7277.6	7655.75	8626.98	7954.03	6448.46	3235.82
2964.02	587.664	7361.5	7761.82	8398.47	8036.18	6429.13	3287.44
2966.02	470.011	7380.1	7872.19	8088.36	8143.16	6390.76	3323.46
2968.02	374.125	7333.97	7955.94	7704.46	8282.58	6330.21	3347.6
2970.02	303.447	7231.09	7979.53	7273.11	8438.41	6245.12	3359.73
2972.02	264.166	7091.08	7950.12	6848.66	8593.19	6149.44	3362.53
2974.02	259.326	6917.67	7878.16	6483.52	8726.88	6053.11	3353.38
2976.02	298.257	6733.84	7768.39	6246.89	8801.71	5969.82	3319.7
2978.01	394.96	6554.61	7625.54	6177.49	8782.53	5907.03	3244.12
2980.01	558.14	6402.55	7470.56	6292.56	8664.11	5877.58	3124.36
2982.01	800.858	6307.29	7329.14	6596.38	8443.9	5895.51	2965.04
2984.01	1130.85	6243.97	7227.82	6893.02	8124.98	5924.13	2764.05
2986.01	1547.81	6214.35	7172.43	7147.05	7712.36	5958.8	2523.98
2988.01	1986.02	6187.97	7154.39	7362.06	7218.47	5981.78	2281.35
2990.01	2411.44	6166.16	7153.35	7535.02	6684.99	5990.19	2065.22
2992.01	2822.47	6153.16	7151.56	7669.15	6171.51	5993.57	1888.22
2994	3219.6	6154.26	7147.06	7765.3	5750.98	6007.44	1749.87
2996	3603.38	6167.18	7154.38	7834.62	5502.65	6052.44	1635.83
2998	3970.04	6184.35	7172.32	7889.71	5422.24	6127.73	1529.08
3000	4311.61	6210.61	7208.43	7940.42	5374.34	6209.08	1439.91
3002	4609.32	6235.98	7268.52	7994.73	5312.21	6284.15	1382.67
3004	4852.31	6240.32	7345.23	8068.16	5226.32	6346.47	1365.67
3006	5033.71	6231.02	7407.54	8158.01	5106.41	6387.34	1385.07
3007.99	5146.26	6215.82	7445.76	8235.48	4953.77	6399.42	1428.28
3009.99	5179.1	6193.03	7464.99	8308.2	4775.85	6384.23	1495.45
3011.99	5124.76	6166.57	7473.79	8378.1	4584.69	6345.58	1583.29
3013.99	4985.39	6136.86	7473.58	8435.17	4390.64	6284.33	1683.41
3015.99	4768.67	6108.41	7463.63	8473.43	4205.37	6203.9	1788.91
3017.99	4490.63	6098.94	7459.03	8482.62	4037.2	6113.69	1895.26
3019.99	4163.89	6109.04	7466.73	8472.77	3898.14	6022.12	2004.02
3021.99	3802.27	6120.01	7501.38	8452.97	3795.07	5934.34	2118.71
3023.98	3427.87	6134.78	7566.82	8422.91	3723.29	5855.13	2238.18
3025.98	3077.83	6154.72	7672.99	8389.28	3710.37	5801.04	2351.33
3027.98	2812.82	6180.38	7806.82	8364.54	3790.88	5791.09	2434.56
3029.98	2643.05	6212.77	7932.72	8359.84	3993.76	5828.43	2474.69
3031.98	2599.34	6255.27	8055	8373.31	4334.72	5923.53	2461.16
3033.98	2702.54	6294.76	8172.71	8379.1	4719	6053.62	2396.22
3035.98	2948.81	6325.9	8283.6	8376.64	5109.39	6208.87	2283.32
3037.97	3253.72	6335.43	8375.89	8370.95	5492.16	6365.63	2151.18
3039.97	3601.5	6326.36	8442.86	8361.01	5859.84	6518.31	2004.85
3041.97	3978.82	6304.45	8483.87	8342.31	6211.14	6664.11	1848.87
3043.97	4376.51	6284.32	8503.35	8310.25	6541.67	6803.22	1687.32
3045.97	4783.14	6282.53	8506.98	8268.27	6853.27	6938.84	1525.74
3047.97	5191.63	6299.99	8493.42	8197.62	7148.88	7066.31	1362.44
3049.97	5592.66	6324.52	8481.23	8080.14	7430.29	7181.77	1205.98
3051.97	5980.5	6355.96	8475.59	7897.53	7701.09	7282.13	1064.26
3053.96	6350.35	6392.52	8482.38	7638.09	7966.44	7365.96	956.564
3055.96	6696.29	6430.09	8487.44	7289.88	8220.46	7424.83	908.386
3057.96	7018.81	6455.43	8464.71	6838.22	8446.43	7444.72	944.95
3059.96	7309.5	6456.42	8416.42	6267.46	8633.08	7416.58	1087.82
3061.96	7567.66	6433.29	8355.59	5572.67	8774.93	7340.83	1331.15
3063.96	7769.79	6377.31	8295.02	4768.04	8873.12	7216.66	1651.74
3065.96	7908.3	6286.57	8252.15	3904.78	8930.76	7056.51	2012.1
3067.95	7989.76	6164.01	8253.56	3074.01	8956.36	6887.54	2367.88
3069.95	8017.34	6009.95	8313.33	2382.6	8949.82	6734.61	2669.74
3071.95	7996.6	5832.27	8358.11	1891.63	8919.52	6599.62	2880.09
3073.95	7929.7	5646.33	8386.07	1542	8876.57	6476.13	3023.12
3075.95	7815.79	5456.62	8406.06	1265.61	8835.43	6355.9	3130.59
3077.95	7664.26	5270.74	8433.64	1033.32	8799.78	6240.34	3218.77
3079.95	7493.46	5113.27	8492.04	839.603	8759.47	6139.57	3292.95
3081.95	7314.83	4958.19	8584.43	681.848	8718.77	6051.61	3359.86
3083.94	7144.18	4827.54	8719.11	552.47	8690.39	5986.74	3427.47
3085.94	6979.41	4747.04	8839.54	447.519	8679.39	5938.58	3485.06
3087.94	6833.44	4745.09	8933.61	369.553	8673.05	5910.95	3524.31
3089.94	6710.44	4840.73	9000.19	319.311	8671.57	5908.45	3543.14
3091.94	6616.84	5014.19	9043.59	303.645	8675.75	5930.8	3542.59
3093.94	6528.42	5221.28	9051.87	332.579	8677.24	5962.28	3517.09
3095.94	6449.9	5432.84	8997.76	419.662	8668.48	5993.73	3455.84
3097.93	6388.98	5636.19	8857.64	585.543	8655.08	6024.69	3347.11
3099.93	6346.82	5824.06	8611.94	850.54	8638.42	6054.36	3179.5
3101.93	6320	5991.12	8252.1	1233.04	8598.65	6078.98	2941.94
3103.93	6298.12	6142.29	7761.95	1748.68	8530.45	6096.3	2628.89
3105.93	6286.6	6279.95	7135.9	2402.32	8428.46	6106.65	2249.14
3107.93	6288.99	6397.66	6396.39	3103.25	8293.08	6095.87	1870.97
3109.93	6304.67	6503.66	5577.96	3790.07	8131.56	6061.59	1575.83
3111.93	6325.82	6613.75	4738.56	4474.53	7948.9	6020.31	1431.54
3113.92	6341.47	6733.78	3951.26	5153.18	7762.04	5988.35	1472.55
3115.92	6350.12	6854.32	3307.96	5813.46	7601.93	5985.56	1635.5
3117.92	6347.37	6967.36	2952.74	6435.33	7482.02	6036.96	1783.35
3119.92	6332.81	7062.35	2954.06	6996.21	7430.71	6155.23	1832.76
3121.92	6309.56	7120.52	3181.94	7493.54	7457.17	6312.55	1813.73
3123.92	6277.66	7125.39	3618.76	7915.99	7507.67	6489.1	1714.78
3125.92	6236.74	7081.36	4261.98	8262.1	7510.83	6670.6	1532.75
3127.91	6191.87	7006.62	4956.91	8532.75	7456.13	6828.86	1345.2
3129.91	6139.83	6913.4	5654.98	8736.54	7333.64	6955.68	1190.96
3131.91	6076.37	6811.16	6335.18	8874.02	7145.5	7048.45	1101.38
3133.91	6001.43	6725.65	6988.35	8958.25	6889.6	7112.66	1101.82
3135.91	5915.89	6677.7	7604.51	9015.21	6566.39	7155.94	1201.26
3137.91	5814.29	6627.52	8184.33	9060.33	6178.56	7173.01	1389.01
3139.91	5703.4	6575.47	8720.6	9070.34	5744.35	7162.83	1624.21
3141.91	5601.7	6527.21	9208.53	9058.29	5279.53	7135.05	1881.61
3143.9	5525.45	6488.02	9641.86	9038.48	4830.4	7104.84	2134.45
3145.9	5477.61	6455.72	10014.4	9026.44	4459.05	7086.65	2357.22
3147.9	5466.27	6425.3	10330.3	9042.55	4209.78	7094.84	2534.06
3149.9	5484.75	6393.21	10579.4	9116.69	4148.83	7144.58	2644.87
3151.9	5495.37	6358.64	10758.7	9263.11	4214.7	7218.11	2713.17
3153.9	5511.71	6298.19	10861.1	9447.42	4289.47	7281.57	2763.86
3155.9	5540.82	6195.01	10871.3	9618.59	4366.16	7318.38	2786.21
3157.89	5588.35	6045.42	10772.7	9773.54	4440.9	7324.17	2777.28
3159.89	5653.8	5863.2	10565.7	9909.78	4513.25	7301.15	2739.36
3161.89	5743.44	5652.07	10255.2	10007	4584.66	7248.47	2672.04
3163.89	5859.68	5437.14	9842.36	10071.3	4657.69	7173.63	2578.29
3165.89	5986.72	5256.6	9356.76	10093	4735.78	7085.78	2463.59
3167.89	6082.57	5114.46	8851.78	10086	4814.38	6989.83	2351.9
3169.89	6154.07	5029.56	8390.04	10056.4	4905.05	6907.03	2248.21
3171.89	6202.92	5034.47	7992.27	10008.8	5025.53	6852.8	2140.46
3173.88	6228.35	5137.88	7703.78	9950.76	5205.27	6845.21	2022.78
3175.88	6224.04	5263.15	7613.08	9890.09	5467.89	6891.65	1912.84
3177.88	6189.91	5399.22	7690.48	9838.51	5781.45	6979.92	1819.03
3179.88	6138.11	5536.67	7724.42	9741.3	6069.5	7042	1716.15
3181.88	6078.87	5676.41	7778.86	9579.21	6330.49	7088.77	1602.2
3183.88	6032.42	5816.2	7850.09	9359.17	6561.22	7123.82	1478.33
3185.88	6007.79	5954.44	7939.61	9072.75	6759.82	7146.88	1342.26
3187.87	6009.61	6090.15	8055.87	8705.21	6921.59	7156.49	1195.31
3189.87	6046.65	6220.39	8204.6	8232	7046.11	7149.95	1045.85
3191.87	6118.01	6341.46	8375.3	7641.51	7140.86	7123.43	929.816
3193.87	6177.83	6461.49	8539.93	6942.96	7212.78	7067	916.98
3195.87	6226.41	6581.24	8666.19	6170.82	7261.18	6981.17	1037.3
3197.87	6229.89	6702.93	8757.25	5379.72	7292.08	6872.37	1264.76
3199.87	6189.95	6817.39	8822.79	4638.42	7306.89	6755.09	1531.62
3201.87	6107.4	6908.59	8867.56	4005.2	7299.52	6637.65	1781.5
3203.86	5976.15	6966.36	8900.58	3476.76	7257.72	6515.51	1997.97
3205.86	5791.69	6967.57	8924.64	3079.72	7178.01	6388.33	2161.87
3207.86	5553.27	6908.59	8931.7	2887.63	7063.99	6269.04	2240.37
3209.86	5266.04	6772.62	8925.96	2962.79	6928.07	6171.1	2215.65
3211.86	4941.51	6550.17	8916.52	3253.73	6781.69	6088.72	2123.85
3213.86	4594.93	6229.49	8902.52	3647.26	6638.01	6002.44	2024.47
3215.86	4223.62	5816.27	8881.14	4033.33	6526.78	5896.23	1973.68
3217.85	3845.86	5308.85	8864.11	4396.37	6467.32	5776.5	1991.32
3219.85	3482.41	4711.47	8865.54	4728.62	6458.49	5649.31	2086.96
3221.85	3169.06	4072.92	8905.1	5029.74	6499	5535.16	2251.53
3223.85	2934.58	3476.39	9005.44	5296.99	6586.02	5459.88	2458.51
3225.85	2812.76	3017.99	9181.56	5538.74	6693.03	5448.81	2662.11
3227.85	2843.99	2808.13	9437.81	5771.84	6809.84	5534.32	2810.27
3229.85	3047.76	2855.86	9725.03	6015.27	6944.4	5717.66	2871.01
3231.85	3323.7	3151.96	9987.81	6286.31	7105.62	5971.08	2849.42
3233.84	3590.91	3540.99	10200.5	6579.06	7284.81	6239.25	2792.59
3235.84	3840.47	3934.58	10350.2	6889.28	7472.48	6497.4	2719.17
3237.84	4068.26	4322.44	10430.2	7212.68	7657.4	6738.2	2629.89
3239.84	4266.26	4700.84	10441	7541.42	7816.94	6953.28	2527.32
3241.84	4433.37	5064.45	10386	7879.14	7949.91	7142.58	2417.26
3243.84	4574.81	5397.9	10272.9	8224.75	8055.18	7305.1	2308.02
3245.84	4692.23	5689.19	10109.1	8543.46	8132.76	7433.35	2204.36
3247.83	4780.88	5942.61	9912.43	8834.98	8184.55	7531.09	2114.53
3249.83	4846.89	6167.12	9717.53	9079.43	8223.77	7606.95	2042.93
3251.83	4904.93	6374.67	9559.07	9258.7	8258.37	7671.15	1985.08
3253.83	4965.33	6573.17	9447.24	9377.47	8296.54	7731.95	1934.28
3255.83	5028.74	6773.04	9330.38	9453.52	8337.57	7784.65	1877.4
3257.83	5081.85	6976.76	9178.27	9514.21	8375.54	7825.33	1818.81
3259.83	5118.54	7183.31	8990.19	9573.99	8403.83	7853.97	1766.65
3261.83	5148.69	7352.65	8772.78	9640.26	8428.45	7868.57	1727.27
3263.82	5173.94	7466.35	8529.12	9717.08	8444.86	7866.27	1703.54
3265.82	5194.12	7513.73	8277.39	9813.62	8436.46	7847.06	1699.2
3267.82	5215.42	7501.86	8021.81	9914.82	8400.85	7810.95	1706.68
3269.82	5237.16	7443.28	7728.3	9978.32	8348.8	7747.17	1712.66
3271.82	5242	7346.1	7402.44	9988.84	8297.05	7655.29	1720.52
3273.82	5234.67	7232.74	7061.52	9953.21	8256.48	7547.72	1730.21
3275.82	5223.26	7138.58	6730.5	9879.93	8237.76	7442.01	1739.1
3277.81	5219.32	7089.53	6449.39	9779.28	8251.27	7357.76	1741.56
3279.81	5229.74	7111.07	6227.07	9656.15	8297.08	7304.22	1733.38
3281.81	5262.75	7170.13	6042.39	9530.56	8368.34	7274.84	1722.09
3283.81	5309.24	7230.47	5916.98	9428.14	8445.3	7266.03	1711.41
3285.81	5354.9	7291.96	5873.97	9348.09	8519.15	7277.62	1695.25
3287.81	5395.74	7341.81	5904.41	9279.68	8580.24	7300.38	1668.36
3289.81	5430.51	7381.81	6022.81	9233.03	8625.67	7338.77	1629.37
3291.81	5462.48	7406.54	6243.63	9197.88	8649.93	7392.09	1572.07
3293.8	5482.08	7409.71	6478.71	9125	8649.49	7429	1504.99
3295.8	5500.09	7374.66	6703.52	8972.68	8624.52	7435.09	1419.68
3297.8	5529.52	7304.05	6929.12	8722.61	8573.11	7411.68	1309.05
3299.8	5570.59	7193.72	7155.79	8356.63	8500.13	7355.37	1179.45
3301.8	5621.36	7043.65	7384.24	7857.02	8412.34	7263.72	1052.57
3303.8	5677.92	6862	7617.38	7217.83	8316.8	7138.38	978.998
3305.8	5729.02	6649.37	7848.09	6439.96	8223.77	6978.04	1032.77
3307.79	5745.69	6414.47	8064.87	5557.84	8136.17	6783.81	1243.69
3309.79	5698.69	6172.77	8265.6	4628.53	8049.6	6563.04	1561.27
3311.79	5586.6	5931.37	8432.76	3736.23	7952.41	6327.87	1903.48
3313.79	5427.3	5683.4	8560.52	3018.36	7844.98	6106.91	2192.11
3315.79	5245.1	5437.33	8641.64	2581.96	7729.41	5927.08	2372.34
3317.79	5044.5	5215.89	8660.95	2343.47	7613.56	5775.67	2466.31
3319.79	4857.88	5042.95	8615.42	2329.49	7501.32	5669.41	2461.76
3321.79	4714.43	4908.68	8521.58	2505.23	7392.43	5608.47	2376.33
3323.78	4632.34	4801.72	8390.47	2865.51	7289.39	5595.89	2218.77
3325.78	4601.23	4686.03	8236.8	3409.23	7196.76	5626.01	2008.19
3327.78	4599.42	4557.38	8085.31	4040.93	7118.75	5680.36	1800.69
3329.78	4609.01	4424.26	7972.55	4648.73	7054.45	5741.8	1651.76
3331.78	4635.86	4293.03	7917.98	5231.41	7011.31	5817.92	1573.29
3333.78	4686.65	4173.23	7863.12	5790.49	6994.24	5901.54	1542.49
3335.78	4769.42	4079.64	7810.01	6325.57	7003.87	5997.7	1548.54
3337.77	4891.33	4022.94	7768.64	6834.95	7030.86	6109.74	1578.42
3339.77	5056.66	4011.25	7742.34	7316.2	7081.51	6241.59	1619.49
3341.77	5248.64	4036.15	7734.95	7754.71	7159.56	6386.8	1666.34
3343.77	5439.25	4079.88	7754.16	8139.8	7259.32	6534.48	1718.62
3345.77	5622.98	4136.79	7793.3	8460.75	7384.66	6679.69	1767.22
3347.77	5796.4	4191.05	7847.91	8708.62	7539.84	6816.76	1809.75
3349.77	5961.44	4242.83	7916.36	8867.81	7723.93	6942.48	1838.24
3351.77	6104.99	4304.02	7998.14	8952.72	7944.22	7060.82	1854.17
3353.76	6227.71	4393.52	8093.5	8972.53	8207.92	7179.03	1855.78
3355.76	6323.64	4528.46	8209.95	8936.05	8479.05	7295.43	1839.12
3357.76	6378.32	4715.98	8338.37	8863.72	8713.52	7401.98	1802.5
3359.76	6387.71	4946.53	8472.64	8762.42	8886.7	7491.2	1747.83
3361.76	6352.02	5195.92	8598.28	8654.73	8980.4	7556.27	1683.89
3363.76	6277.58	5436.14	8709.33	8534.7	8989.76	7589.5	1617.58
3365.76	6169.38	5672.3	8818.73	8407.4	8919.01	7597.36	1552.39
3367.75	6028.42	5912.89	8935.1	8282.31	8785.43	7588.83	1497.4
3369.75	5874.32	6158.37	9058.5	8165.95	8604.32	7572.29	1458.48
3371.75	5682.97	6410.29	9186.95	8059.13	8393.26	7546.52	1452.12
3373.75	5450.58	6652.93	9269.71	7980.91	8188.84	7508.59	1479.44
3375.75	5160.68	6878.86	9263.14	7946.79	8041.35	7458.17	1537.11
3377.75	4821.73	7083.77	9145.85	7947.98	7990.34	7397.93	1615.88
3379.75	4451.06	7261.31	8906.2	7978.17	8008.66	7321.08	1707.17
3381.75	4050.57	7400.66	8539.8	8030.78	8052.82	7214.93	1814.57
3383.74	3604.63	7499.56	8029.76	8095.32	8119.05	7069.66	1953.6
3385.74	3147.81	7561	7378.64	8161.12	8185.19	6886.75	2120.51
3387.74	2694.75	7582.94	6611.2	8214.41	8246.22	6669.91	2318.9
3389.74	2251.25	7572.95	5746.52	8250.66	8302.67	6424.81	2552.3
3391.74	1833.7	7528.21	4824.06	8278.01	8354.21	6163.64	2813.99
3393.74	1450	7454.17	3910.71	8297.48	8400.45	5902.56	3089.31
3395.74	1117.97	7338.01	3083.68	8312.78	8441.64	5658.82	3348.8
3397.73	869.462	7173.22	2462.89	8333.92	8476.58	5463.21	3547.88
3399.73	703.414	6950.14	2087.74	8364.02	8495.92	5320.25	3666.41
3401.73	564.981	6661.63	1707.66	8404.3	8489.27	5165.57	3771.51
3403.73	449.739	6307.13	1430.12	8437.27	8458.75	5016.6	3838.42
3405.73	352.915	5900.41	1224.54	8470.1	8415.84	4872.76	3882.29
3407.73	275.473	5479.65	1088.18	8502.92	8364.27	4742.1	3908.64
3409.73	212.318	5107.95	1026.31	8534.53	8316.32	4639.49	3923.16
3411.73	160.518	4861.07	1049.33	8568.58	8276.75	4583.25	3925.91
3413.72	119.715	4823.99	1174.07	8583.42	8238.87	4588.01	3904.11
3415.72	86.5175	5063.42	1411.07	8566.84	8192.46	4664.06	3852.81
3417.72	59.0627	5317.77	1771.88	8518.81	8143.37	4762.18	3772.09
3419.72	37.9697	5569.05	2262.49	8443.92	8096.72	4882.03	3668.11
3421.72	20.1916	5801.07	2825	8357.67	8060.47	5012.88	3564.07
3423.72	5.82004	6004.83	3396.27	8267.7	8039.72	5142.87	3476.32
3425.72	-5.12997	6172.7	3970.23	8189.88	8042.82	5274.1	3411.21
3427.71	-11.5965	6300.64	4532.64	8140.39	8067.77	5405.97	3371.77
3429.71	-12.3864	6400.56	5075.31	8111.21	8100.6	5535.06	3352.36
3431.71	-4.06754	6482.46	5589.56	8077.07	8130.18	5655.04	3343.16
3433.71	15.6151	6540.27	6065.01	8034.18	8155.68	5762.15	3339.57
3435.71	49.9715	6553.06	6489.21	8000.16	8165.11	5851.5	3336.4
3437.71	102.528	6526.49	6850.56	7974.37	8153.33	5921.46	3327.35
3439.71	174.173	6477.27	7149.27	7965.22	8120.44	5977.27	3310.76
3441.71	268.317	6414.78	7386.97	7976.79	8063.26	6022.02	3282.92
3443.7	386.3	6345.48	7573.08	7997.52	7990.22	6058.52	3241.97
3445.7	526.11	6279.06	7712.86	7981.83	7912.9	6082.55	3183.08
3447.7	647.812	6217.59	7817.71	7918.78	7843.01	6088.98	3123.95
3449.7	760.431	6163.35	7903.64	7807.83	7781.94	6083.44	3062.37
3451.7	888.649	6118.01	7977.98	7649.59	7736.28	6074.1	2990.01
3453.7	1062.65	6089.73	8041.26	7442.14	7706.65	6068.49	2894.88
3455.7	1312.94	6086.99	8102.29	7184.32	7685.57	6074.42	2766.4
3457.69	1653.91	6120.99	8163.75	6883.16	7661.77	6096.71	2601.9
3459.69	2108.48	6196.37	8208.81	6554.69	7624.62	6138.59	2393.34
3461.69	2612.44	6322.45	8238.98	6211.97	7574.72	6192.11	2175.59
3463.69	3115.59	6503.39	8241.47	5877.44	7503.97	6248.37	1972.68
3465.69	3586.99	6696.08	8189.38	5559.37	7424.17	6291.2	1795.76
3467.69	4009.81	6880.13	8082	5258.09	7342.69	6314.54	1652.93
3469.69	4371.65	7047.13	7938.87	4967.88	7272.63	6319.63	1555.74
3471.69	4674.81	7183.64	7782.73	4675.26	7213.33	6305.95	1507.84
3473.68	4925.66	7277.54	7630.72	4375.85	7178.31	6277.61	1507.19
3475.68	5128.74	7331.5	7505.65	4061.75	7168.89	6239.31	1552.08
3477.68	5294.03	7345.46	7447.63	3737.37	7169.33	6198.76	1635.05
3479.68	5433.12	7332.32	7467.09	3411.82	7172.22	6163.31	1745.58
3481.68	5562.24	7296.07	7532.11	3082.11	7171.56	6128.82	1872.33
3483.68	5684.83	7253.18	7605.93	2727.98	7166.56	6087.7	2017.26
3485.68	5815.1	7216.09	7676.09	2363.22	7157.46	6045.59	2172.43
3487.67	5923.15	7176.13	7735.69	2022.07	7142.57	5999.92	2320.09
3489.67	6003.35	7116.42	7784.06	1736.1	7120.02	5951.99	2441.98
3491.67	6052.54	7032.87	7821.5	1549.41	7092.22	5909.71	2517.31
3493.67	6084.71	6898.65	7851.39	1512.01	7057.72	5880.9	2521.52
3495.67	6120.48	6693.67	7878.36	1642.7	7020.69	5871.18	2447.9
3497.67	6175.92	6416.08	7888.93	1889.36	6988.46	5871.75	2321.87
3499.67	6268.68	6066.95	7874.09	2227.91	6980.43	5883.61	2162.82
3501.67	6412.47	5671.4	7843.2	2576.71	7009.76	5902.71	2022.79
3503.66	6616.41	5273.3	7803.6	2935.91	7069.05	5939.65	1915.35
3505.66	6787.6	4913.91	7761.57	3304.43	7137.86	5981.07	1834.54
3507.66	6908.91	4670.34	7719.7	3685.23	7205.33	6037.9	1757.5
3509.66	6980.03	4595.64	7660.41	4063.51	7271.65	6114.25	1657.67
3511.66	7005	4752.31	7576.68	4426.23	7340.01	6220.05	1506.9
3513.66	6990.08	4990.85	7466.96	4763.59	7415.21	6325.34	1337.25
3515.66	6931.38	5260.23	7330.53	5074.22	7505.49	6420.37	1164.59
3517.65	6828.22	5537.56	7164.95	5359.57	7618.12	6501.69	1003.36
3519.65	6679.13	5797.3	6962.41	5621.79	7737.26	6559.58	869.487
3521.65	6486.33	6028.92	6730.4	5872.14	7850.83	6593.72	782.657
3523.65	6243.84	6231.55	6477.53	6123.26	7953.36	6605.91	764.247
3525.65	5933.59	6413.32	6225.51	6372.87	8036.43	6596.34	826.746
3527.65	5560.94	6586.56	6010.57	6633.38	8107.82	6579.85	961.75
3529.65	5145.5	6761.88	5892.56	6912.48	8158.97	6574.28	1136.55
3531.65	4708.28	6927.18	5932.09	7208.59	8195.52	6594.33	1327.37
3533.64	4297.86	7085.77	6110.44	7514.98	8217.4	6645.29	1518.09
3535.64	3955.44	7236.35	6315.26	7798.14	8227.38	6706.51	1696.09
3537.64	3730.78	7359.06	6548.16	8025.58	8232.06	6779.13	1826.66
3539.64	3666.85	7436.65	6809.05	8192.53	8241.4	6869.3	1885.13
3541.64	3795.45	7470.05	7077.75	8307.29	8262.12	6982.53	1857.19
3543.64	3987.42	7464.91	7324.55	8368.26	8297.78	7088.58	1796.82
3545.64	4195.58	7433.22	7534.19	8377.81	8343.93	7176.95	1723.79
3547.63	4401.54	7379.4	7704.48	8349.35	8399.81	7246.92	1648.3
3549.63	4608.06	7325.18	7835.23	8282.84	8448.47	7299.95	1566.73
3551.63	4816.31	7281.92	7926.76	8186.02	8471.29	7336.46	1475.82
3553.63	5023.89	7240.5	7980.55	8068.26	8455.26	7353.69	1374.57
3555.63	5225.18	7215.42	8009.16	7939.68	8400.93	7358.08	1266.82
3557.63	5399.9	7194.02	8015.64	7810.22	8311.51	7346.26	1162.6
3559.63	5547.16	7162.16	8003.62	7680.58	8201.76	7319.06	1065.68
3561.63	5662.82	7116.06	7972.3	7479.4	8080.15	7262.15	974.66
3563.62	5744.91	7051.52	7908.91	7202.2	7961	7173.71	896.875
3565.62	5802.49	6976.53	7814.63	6848.65	7854.2	7059.3	841.602
3567.62	5837.29	6895.69	7700.27	6420.64	7756.98	6922.17	826.371
3569.62	5854.36	6818.49	7576.1	5935.09	7651.81	6767.17	860.982
3571.62	5855.35	6756.51	7463.42	5421.15	7545.86	6608.46	949.798
3573.62	5848.02	6723.31	7386.32	4896.43	7442.25	6459.26	1085.3
3575.62	5841.26	6711.52	7352.1	4400.84	7348.29	6330.8	1243.75
3577.61	5828.54	6709.88	7374.02	3976.37	7268	6231.36	1401.47
3579.61	5818.77	6724.05	7449.72	3601.97	7208.64	6160.63	1560.54
3581.61	5817.59	6738.41	7507.19	3243.48	7159.49	6093.23	1713.88
3583.61	5833.85	6743.7	7546.33	2919.14	7119.67	6032.54	1851.48
3585.61	5877.66	6724.2	7559.13	2648.7	7090.51	5980.04	1961.43
3587.61	5947.09	6665.67	7546.8	2454.82	7064.51	5935.78	2032.2
3589.61	6049.62	6557.78	7504.58	2342.73	7039.46	5898.83	2060.48
3591.61	6182.78	6375.91	7422.85	2309.63	7013	5860.84	2046.18
3593.6	6329.27	6123.73	7298.13	2351.96	6995.6	5819.74	1996.61
3595.6	6455.11	5794.62	7124.09	2413.68	6986.1	5754.72	1939.47
3597.6	6533.97	5383.46	6900.67	2482.7	6977.79	5655.72	1884.89
3599.6	6559.74	4906.19	6644.66	2584.31	6970.82	5533.14	1833.37
3601.6	6531.97	4390.37	6370.58	2726.75	6964.1	5396.75	1791.32
3603.6	6451.68	3882.81	6094.48	2901.2	6956.4	5257.31	1764.57
3605.6	6320.54	3441.66	5829.15	3109.63	6942.83	5128.77	1741.04
3607.59	6141.07	3149.53	5583.46	3352.8	6928.81	5031.13	1695.24
3609.59	5940.64	3009.29	5365.9	3627.71	6921.79	4973.07	1624.38
3611.59	5754.6	3020.39	5187.78	3913.81	6928.37	4960.99	1534.14
3613.59	5532.2	3045.99	5069.07	4161.67	6945.59	4950.9	1464.77
3615.59	5273.02	3072.49	5027.59	4346.8	6965.67	4937.11	1419.63
3617.59	4982.86	3101.4	5080.81	4451.69	6987.81	4920.91	1399.31
3619.59	4660.82	3144.5	5242.91	4468.5	7007.66	4904.88	1404
3621.59	4307.35	3213	5491.71	4387.26	7006.19	4881.1	1435.66
3623.58	3927.21	3315.38	5749.65	4203.84	6979.1	4835.04	1497.12
3625.58	3528.12	3464.41	5997.29	3918.91	6931.76	4768.1	1593
3627.58	3113.53	3672.49	6221.94	3538.15	6866.4	4682.5	1727.04
3629.58	2735.29	3926.37	6400.47	3092.29	6787.31	4588.35	1886.1
3631.58	2441.94	4194.28	6524.61	2633.67	6703.93	4499.69	2047.48
3633.58	2258.25	4440.34	6594.65	2232.95	6621.14	4429.47	2181.19
3635.58	2190.62	4659.24	6624.98	1982.41	6527.17	4396.88	2251.04
3637.57	2249.22	4857.75	6640.35	1992.63	6415.69	4431.13	2219.69
3639.57	2416.62	5039.32	6663.14	2207.68	6273.49	4520.05	2104.08
3641.57	2615.61	5206.15	6711.08	2581.22	6068.41	4636.5	1935.65
3643.57	2826.71	5356.51	6801.56	3073.11	5786.48	4768.88	1743.58
3645.57	3047.87	5470.01	6924.31	3625.2	5417.49	4896.98	1560.93
3647.57	3273.22	5547.47	7061.03	4179.18	4958.4	5003.86	1432.2
3649.57	3500.74	5586.86	7207.84	4716.95	4419.85	5086.45	1400.54
3651.57	3732.58	5588.45	7367.34	5224.68	3825.53	5147.72	1489.77
3653.56	3961.43	5549.83	7530.78	5693.79	3211.56	5189.48	1679.75
3655.56	4188.6	5464.9	7690.1	6119.36	2631.8	5218.95	1919.16
3657.56	4419.19	5318.11	7828.98	6495.52	2148.62	5242.08	2151.49
3659.56	4637.23	5102.98	7934.61	6823.25	1841.15	5267.84	2329.05
3661.56	4842.84	4822.38	8009.26	7100.71	1784.04	5311.84	2417.7
3663.56	5029.08	4486.28	8052.44	7319.07	1863.2	5350.01	2459.02
3665.56	5183.31	4114.72	8074.65	7475.99	2085.26	5386.79	2457.08
3667.55	5298.12	3730.58	8074.68	7579.21	2448.81	5426.28	2419
3669.55	5372.12	3372.76	8064.07	7637.99	2918.67	5473.12	2363.61
3671.55	5409.25	3097.6	8057.42	7670.05	3400.35	5526.93	2314.85
3673.55	5405.52	2948.4	8072.1	7681.21	3875.6	5596.57	2263.02
3675.55	5368.09	2960.16	8120.74	7670.85	4339.98	5691.96	2191.49
3677.55	5299.02	3150.78	8177.49	7642.57	4784.97	5810.97	2082.46
3679.55	5204.61	3424.02	8229.94	7608.26	5204.02	5934.17	1964.65
3681.55	5093.15	3714.48	8273.9	7575.38	5591.56	6049.69	1860.97
3683.54	4981.39	4008.57	8310.56	7520.66	5943.79	6152.99	1770.64
3685.54	4870.53	4274.93	8344.87	7448.85	6258.86	6239.61	1705.07
3687.54	4759.32	4487.95	8366.55	7367.51	6537.2	6303.7	1667.6
3689.54	4646.63	4638.79	8387.23	7289.24	6776.49	6347.68	1661.63
3691.54	4544.59	4729.05	8393.75	7220.45	6975.67	6372.7	1674.1
3693.54	4457.29	4746.09	8380.46	7162.3	7137.24	6376.68	1699.53
3695.54	4400.37	4679.88	8342.7	7116.14	7263.47	6360.51	1730.76
3697.53	4378.55	4521.23	8283.68	7085.01	7358.32	6325.36	1769.47
3699.53	4394.19	4278.57	8202.4	7078.98	7432.25	6277.28	1818.21
3701.53	4457.11	3958.98	8095.92	7106.8	7474.82	6218.72	1877.5
3703.53	4583.92	3579.3	7964.5	7141.44	7479.73	6149.78	1943.24
3705.53	4742.58	3160.32	7811.14	7186.83	7456.31	6071.44	2026.63
3707.53	4908.68	2732.6	7634.59	7237.8	7419.22	5986.58	2126.27
3709.53	5075.8	2329.6	7435.95	7292.43	7377.52	5902.26	2230.92
3711.53	5241.51	1991.74	7225.65	7341.45	7341.08	5828.29	2323.48
3713.52	5405.03	1724.81	6999.33	7379.92	7319.38	5765.69	2397.94
3715.52	5548.02	1519.49	6752.67	7403.64	7315.37	5707.84	2455.58
3717.52	5659.82	1411.94	6492.29	7412.63	7331.34	5661.6	2480.11
3719.52	5733.23	1416.9	6243.29	7410.27	7361.55	5633.05	2464.98
3721.52	5768.11	1566.65	6027.38	7375.81	7408.46	5629.28	2392.62
3723.52	5773.43	1846.67	5853.2	7316.13	7463.56	5650.6	2268.64
3725.52	5754.29	2200.61	5745.41	7232.45	7508.52	5688.26	2113.6
3727.51	5709.51	2597.16	5643.85	7127.74	7536.34	5722.92	1938.99
3729.51	5643.35	3038.92	5536.34	7008.95	7534.5	5752.41	1744.73
3731.51	5553.22	3513.06	5417.77	6888.72	7497.3	5774.01	1541.09
3733.51	5443.55	3977.25	5281.88	6777.35	7414.86	5778.98	1348.95
3735.51	5319.05	4408.44	5124.46	6689.9	7287.06	5765.78	1185.49
3737.51	5187.27	4801.27	4935.44	6653.04	7126.65	5740.74	1071.27
3739.51	5060.03	5152.18	4700.35	6655.71	6946.33	5702.92	1021.72
3741.51	4950.16	5461.82	4401.79	6710.45	6771.23	5659.09	1056.47
3743.5	4875.67	5732.04	4045.2	6814.14	6629.77	5619.36	1171.77
3745.5	4854.41	5960.6	3627.16	6923.11	6557.11	5584.48	1345.69
3747.5	4897.55	6142.14	3165.66	7019.62	6596.15	5564.22	1558.41
3749.5	4984.08	6263.02	2690.4	7104.86	6715.31	5551.53	1787.56
3751.5	5093.29	6312.75	2250.41	7184.51	6850.16	5538.22	2002.44
3753.5	5210.77	6291.79	1882.42	7267.41	6992.32	5528.94	2187.69
3755.5	5326.16	6206.93	1522.61	7365.65	7141.3	5512.53	2372.94
3757.5	5428.86	6059.34	1223.11	7490.29	7285.34	5497.39	2537.64
3759.49	5506.85	5854.45	1020.89	7642.76	7417	5488.39	2667.1
3761.49	5554.14	5606.58	870.118	7808.15	7519.13	5471.62	2777.16
3763.49	5573.62	5331.71	744.745	7959.05	7589.41	5439.71	2874.05
3765.49	5564.95	5056.78	645.27	8083.45	7629.68	5396.03	2954.86
3767.49	5525.75	4821.64	576.263	8170.26	7645.83	5347.95	3013.44
3769.49	5463.41	4665.63	542.599	8223.38	7646.98	5308.4	3046.15
3771.49	5388.83	4607.75	550.226	8251.88	7633.71	5286.48	3049.85
3773.48	5300.48	4563.94	613.33	8270.45	7613.29	5272.3	3028.11
3775.48	5208.27	4546.18	743.419	8287.1	7599.71	5276.93	2981.1
3777.48	5115.29	4568.25	954.132	8301.61	7609.58	5309.77	2906.87
3779.48	5031.36	4642.15	1258.23	8315.85	7636.66	5376.85	2800.3
3781.48	4969.22	4778.78	1659.5	8325.96	7663.74	5479.44	2655.99
3783.48	4932.3	4973.39	2144.68	8298.14	7690.16	5607.73	2471.14
3785.48	4907.26	5203.26	2628.19	8227.32	7707.81	5734.77	2276.17
3787.48	4903.83	5449.38	3091.5	8115.65	7712.81	5854.63	2077.75
3789.47	4927.89	5703.01	3516.41	7970.8	7707.03	5965.03	1883.99
3791.47	4975.2	5959.72	3894.84	7792.1	7693.6	6063.09	1698.79
3793.47	5031.9	6179.95	4217.99	7580.73	7672.46	6136.61	1528.7
3795.47	5092.64	6350.79	4480.94	7334.22	7636.77	6179.07	1374.11
3797.47	5154.48	6469	4680.49	7024.8	7580.46	6181.85	1230.72
3799.47	5208.41	6534.8	4819.23	6657.26	7508.9	6145.72	1107.86
3801.47	5248.68	6552.97	4901.04	6232.19	7432.8	6073.53	1019.53
3803.46	5272.88	6528.41	4927.63	5749.04	7355.62	5966.72	981.459
3805.46	5274.06	6478.84	4903.91	5202.89	7279.82	5827.9	1010.31
3807.46	5241.56	6404.39	4839.26	4632.64	7208.61	5665.29	1101.86
3809.46	5169.59	6309.41	4747.49	4093.29	7155.12	5494.98	1229.71
3811.46	5054.84	6203.55	4630.85	3656.85	7116.94	5332.61	1352.79
3813.46	4898.33	6091.71	4492.25	3402.18	7074.5	5191.79	1425.89
3815.46	4704.15	5922.15	4337.63	3382.85	7035.11	5076.38	1423.4
3817.46	4486.03	5683.55	4178.03	3577.36	6996.32	4984.26	1361.52
3819.45	4246.93	5395.95	4024.2	3736.64	6960.32	4872.81	1326.1
3821.45	3998.15	5087.03	3885.48	3872.54	6932.7	4755.18	1319.11
3823.45	3762.13	4777.17	3768.62	3949.64	6923.28	4636.17	1345.24
3825.45	3586.93	4491.59	3678.42	3962.35	6936.1	4531.08	1389.92
3827.45	3517.49	4281.13	3627.96	3912.13	6973.73	4462.49	1434.53
3829.45	3543.51	4206.19	3626.11	3807.81	7029.78	4442.68	1468.62
3831.45	3577.2	4223.98	3669.65	3673.26	7075.02	4443.82	1492.96
3833.44	3620.95	4306.93	3739.96	3518.22	7102.61	4457.73	1509.65
3835.44	3673.38	4460.18	3838.65	3360.24	7125.58	4491.61	1526
3837.44	3738.21	4672.01	3965.93	3218.58	7136.15	4546.18	1539.14
3839.44	3812.82	4934.32	4115.72	3096.85	7126.46	4617.24	1549.75
3841.44	3898.88	5217.27	4258.95	2935.25	7100.84	4682.24	1579.61
3843.44	3991.67	5498.72	4369.01	2738.14	7066.62	4732.83	1635.06
3845.44	4088.94	5762.87	4435.39	2524.71	7032.35	4768.85	1711.81
3847.44	4189.89	6001.85	4447.3	2321.94	6998.53	4791.9	1796.88
3849.43	4294.32	6197.8	4389.9	2157.84	6966.39	4801.25	1874.3
3851.43	4401.28	6334.19	4267.87	2049.73	6939.44	4798.5	1932.43
3853.43	4508.55	6410.1	4088.13	2020.62	6918.16	4789.11	1961.83
3855.43	4613	6431.06	3852.17	2098.48	6890.78	4777.1	1953.25
3857.43	4706.31	6405.45	3559.91	2297.42	6839.29	4761.68	1906.46
3859.43	4781.18	6334.09	3227.4	2602.88	6762.81	4741.67	1836.42
3861.43	4843.9	6206.8	2878.55	2956.47	6663.48	4709.84	1768.01
3863.42	4894.33	6023	2516.8	3329.1	6549.77	4662.6	1721.08
3865.42	4942.88	5783.98	2163.45	3705.96	6429.25	4605.1	1703.05
3867.42	4992.69	5492.75	1814.68	4074.93	6311.17	4537.24	1724.33
3869.42	5016.66	5150.27	1482.65	4430.27	6210.15	4458	1782.89
3871.42	5000.02	4789.62	1194.15	4768.83	6132.74	4377.07	1865.82
3873.42	4949.24	4463.86	983.242	5084.35	6073.98	4310.93	1950.05
3875.42	4863.16	4224.44	860.353	5377.67	6033.72	4271.87	2019.73
3877.42	4736.88	4123.26	783.035	5650.9	6007.85	4260.39	2081.16
3879.41	4568.49	4231.41	755.874	5904.14	5991.31	4290.24	2125.5
3881.41	4365.61	4553.32	793.02	6147.19	5978.23	4367.47	2154.83
3883.41	4146.64	4839.28	912.327	6368.36	5968.9	4447.1	2164.82
3885.41	3924.48	5156.49	1128.12	6571.18	5964.56	4548.97	2153.75
3887.41	3721.73	5478.06	1454.13	6751.09	5969.21	4674.84	2116.17
3889.41	3560.56	5773.75	1900.37	6906.62	5989.99	4826.26	2045.9
3891.41	3464.29	6040.25	2461.45	7036.63	6030.16	5006.56	1942.53
3893.4	3457.08	6285.5	3030.42	7153.68	6095.83	5204.5	1840
3895.4	3551.98	6486.96	3584.09	7267.87	6191.39	5416.46	1732.63
3897.4	3697.17	6648.73	4107.47	7385.8	6324.33	5632.7	1632.23
3899.4	3800.77	6769.75	4598.75	7510.99	6480.42	5832.13	1562.5
3901.4	3865.14	6862.3	5058.65	7625.08	6653.82	6013	1521.09
3903.4	3887.94	6928.63	5483.51	7725.73	6841.13	6173.39	1510.4
3905.4	3873.01	6972.24	5868.8	7808.6	7023.14	6309.16	1526.97
3907.4	3831.81	6990.85	6215.56	7868.34	7171.55	6415.62	1559.55
3909.39	3779.86	6975.74	6524.3	7901.54	7278.03	6491.89	1596.51
3911.39	3736.53	6925.6	6806.73	7914.84	7338.27	6544.39	1628.39
3913.39	3720.4	6834.13	7063.81	7909.12	7358.92	6577.28	1646.91
3915.39	3741.95	6693.85	7289.95	7887.09	7352.07	6592.98	1648.88
3917.39	3834.26	6493.75	7470.57	7850.54	7325.91	6595	1620.89
3919.39	3984.83	6231.54	7609.89	7807.98	7293.21	6585.49	1575.87
3921.39	4193.06	5915.71	7712	7761.29	7255.54	6567.52	1522.43
3923.38	4418.53	5576.07	7786.33	7711.56	7219.19	6542.34	1484.67
3925.38	4632.56	5258.54	7832.23	7637.61	7190.31	6510.25	1464.03
3927.38	4825.16	5020.05	7860.81	7542.17	7175.25	6484.69	1448.11
3929.38	4988.97	4933.59	7869.37	7438.96	7171.16	6480.41	1409.1
3931.38	5120.67	5001.29	7856.71	7343.14	7175.73	6499.51	1337.61
3933.38	5224.73	5123	7828.75	7276.45	7182.82	6527.15	1260.31
3935.38	5303.13	5239.26	7796.46	7254.68	7186.3	6555.97	1196.63
3937.38	5364.28	5343.04	7769.62	7275.27	7177.73	6585.99	1147.14
3939.37	5411.65	5427.78	7753.9	7322.24	7155.84	6614.28	1112.13
3941.37	5457.05	5493.42	7749.97	7370.5	7125.43	6639.27	1085.74
3943.37	5488.66	5546.42	7769.41	7419.94	7094.98	6663.88	1073.49
3945.37	5481.44	5596.66	7800.74	7478.76	7065.65	6684.65	1078.52
3947.37	5437.32	5647.62	7817.26	7533.88	7046.58	6696.53	1091.5
3949.37	5356.35	5702.16	7828.68	7583.55	7040.23	6702.2	1114.83
3951.37	5233.65	5757.86	7841.02	7628.63	7044.51	6701.13	1153.34
3953.36	5068.31	5811.91	7850.57	7662.63	7062.36	6691.16	1207.53
3955.36	4860.72	5870.85	7862.53	7687.6	7094.53	6675.25	1279.64
3957.36	4621.27	5931.9	7874.86	7689.63	7141.95	6651.92	1365.15
3959.36	4363.99	5996.67	7883.93	7662.47	7191.07	6619.63	1456.76
3961.36	4114.23	6065.88	7886.66	7594.34	7236.62	6579.55	1542.06
3963.36	3904.86	6136.21	7892.61	7472.2	7279.86	6537.15	1608.8
3965.36	3797.16	6203.7	7908.41	7296.73	7315.62	6504.32	1633.76
3967.36	3726.9	6270.52	7937.16	7087.53	7323.93	6469.21	1645.25
3969.35	3709.21	6336.53	7981.03	6866.68	7296.21	6437.93	1639.96
3971.35	3740.91	6411.56	8038.56	6652.12	7234.59	6415.55	1621.32
3973.35	3765.11	6505.02	8109.69	6485.86	7137.43	6400.62	1614.61
3975.35	3793.57	6619.83	8182.9	6424.63	7000.17	6404.22	1611
3977.35	3843.36	6745.92	8251.53	6509.22	6823.48	6434.7	1602.3
3979.35	3906.31	6866.05	8305.98	6625.31	6620.47	6464.82	1592.7
3981.35	3978.93	6973.33	8338.41	6758.03	6394.52	6488.64	1584.03
3983.34	4064.68	7018.92	8343.68	6900.63	6153.37	6496.26	1571.61
3985.34	4167.16	6968.48	8308.17	7047.49	5916.59	6481.58	1546.73
3987.34	4292.11	6821.79	8244.74	7200.82	5709.33	6453.76	1510.63
3989.34	4438.03	6572.22	8157.53	7362.92	5562.31	6418.6	1465.87
[truncated: 1,004 more rows]
