# Supplementary material for: Ionogel thin films as a compatibilizing pretreatment for electrospray deposition
Source: Royal Society of Chemistry journal article supplement (doi:10.1039/d5lp00359h), 2026-01-01
Supplement: d5lp00359h1.zip [file G data.xlsx]

## Sheet: Sheet1
Lateral	Height Data	Height Data	Height Data	Height Data	Height Data
µm	nm	nm	nm	nm	nm
	H1	H2	H3	H4	H5
0	4.6118	3.79995	5.26735	-1.60878	1.29397
1.99867	3.29284	3.33814	2.17887	-2.23414	-0.834057
3.99734	1.18416	1.13362	-0.417142	-0.0698416	1.73414
5.996	-0.969159	-0.582916	-0.723155	0.714965	-0.932498
7.99467	-2.92105	-2.83175	-2.60414	1.71575	-0.837639
9.99334	-5.19859	-4.85705	-3.70178	1.48204	-0.423915
11.992	-7.34827	-6.22397	-2.43072	0.914272	-3.25884
13.9907	-9.10798	-6.96987	-1.21914	0.0641735	-4.30108
15.9893	-10.7414	-7.89602	-0.165409	-0.931078	-4.29582
17.988	-12.1951	-8.65633	-0.349231	-3.11652	-4.6878
19.9867	-13.497	-8.85751	-1.38259	-5.76968	-5.45557
21.9853	-14.8455	-9.2357	-0.651478	-8.23206	-5.51343
23.984	-15.1866	-8.80645	0.775055	-8.72649	-5.54344
25.9827	-14.8479	-8.5656	1.9522	-7.00213	-6.2867
27.9813	-13.7548	-8.07095	0.590212	-2.90668	-5.3348
29.98	-11.7756	-7.87486	-1.35104	2.60499	-4.83782
31.9787	-9.43601	-7.34407	-3.89087	9.10538	-5.35261
33.9773	-7.67895	-7.15169	-5.44862	14.7546	-4.53616
35.976	-5.87367	-7.04962	-6.13026	17.7804	-4.33101
37.9747	-3.8334	-6.67523	-6.77542	20.5362	-4.49349
39.9734	-1.63794	-5.5457	-7.26183	23.4264	-5.31956
41.972	-0.254559	-5.09043	-6.24025	25.9779	-5.58111
43.9707	1.15361	-5.84358	-4.79922	28.6272	-5.50831
45.9694	2.07181	-5.1768	-3.19657	30.1734	-5.79865
47.968	3.15533	-6.2283	-3.47572	31.2482	-5.87882
49.9667	5.07788	-10.2238	-3.82264	32.0961	-5.47517
51.9654	7.16765	-8.47794	-4.87881	32.8431	-5.70993
53.964	8.32719	-10.4497	-6.46301	33.2887	-5.88742
55.9627	9.08284	-11.8933	-6.06529	33.0418	-5.38371
57.9614	9.40128	-9.81246	-4.43571	32.3465	-6.10359
59.96	9.65497	-8.29046	-2.56476	31.2133	-6.95279
61.9587	9.94802	-7.8381	-1.13555	30.0972	-6.62992
63.9574	10.0627	-4.89502	-1.07671	28.9222	-7.44664
65.956	10.2303	-1.7912	1.0501	27.8587	-7.11579
67.9547	10.0782	0.366974	3.88383	28.1952	-7.42289
69.9534	9.51173	2.19682	6.51706	29.1913	-8.25517
71.952	9.27589	2.34013	10.7585	30.2158	-7.407
73.9507	9.16045	1.57437	16.7551	31.9295	-7.8609
75.9494	9.15355	1.55907	22.3282	33.1098	-8.97706
77.948	8.83695	0.356334	28.9766	33.4018	-8.01996
79.9467	8.07399	-2.07822	34.7895	33.378	-8.47886
81.9454	7.58184	-3.22406	41.5352	33.1533	-9.43026
83.944	6.62234	-4.41139	49.978	31.8809	-9.05285
85.9427	5.84877	-5.18798	57.8457	29.7067	-8.50864
87.9414	5.17469	-6.18155	66.9312	27.557	-9.36666
89.94	4.0193	-7.18485	70.8331	25.2399	-8.71945
91.9387	3.44849	-8.07302	58.3912	23.0029	-8.01477
93.9374	3.18258	-7.91035	43.3825	21.3411	-7.96216
95.936	3.45192	-8.083	36.7867	19.2213	-7.33839
97.9347	4.2456	-7.46771	34.5164	17.6277	-7.43414
99.9334	4.6723	-6.18442	32.8548	16.6113	-7.88372
101.932	5.31397	-7.75256	30.8875	16.0922	-7.7713
103.931	5.76614	-8.80661	29.7103	15.2612	-7.32645
105.929	5.93789	-9.46753	28.3352	14.7405	-7.27126
107.928	6.33863	-10.8019	27.5482	13.6334	-6.92496
109.927	7.13727	-12.424	26.5602	12.5022	-6.63295
111.925	8.59021	-12.1034	25.1163	10.7901	-6.78328
113.924	10.3033	-10.1594	22.5479	8.89173	-6.78235
115.923	11.0029	-9.83008	21.601	7.12491	-6.74716
117.921	11.7216	-8.93699	21.3109	5.37276	-6.40102
119.92	12.0185	-6.88447	21.2074	4.726	-6.40436
121.919	12.0276	-5.85555	20.8262	4.45126	-6.67286
123.917	12.0064	-7.00386	20.2129	4.53569	-6.6506
125.916	11.0727	-7.65409	19.4274	3.31207	-7.17784
127.915	10.1293	-7.64007	19.178	2.64669	-6.81002
129.913	9.40991	-7.37666	18.3609	2.03998	-6.57708
131.912	9.24988	-7.84824	18.2547	1.82839	-6.77774
133.911	9.11924	-8.90506	18.6913	1.50915	-6.66191
135.909	9.69228	-6.52966	18.0252	1.05622	-6.35384
137.908	10.25	-6.04509	17.4903	-0.376777	-6.45786
139.907	10.4657	-9.65185	16.4283	-1.88431	-6.37514
141.905	11.2301	-6.96431	16.237	-2.10482	-5.92711
143.904	11.2345	-9.39783	17.4408	-1.54681	-6.15597
145.903	10.5289	-11.0767	17.6948	-1.24823	-7.09027
147.901	9.70054	-8.62936	18.4715	-1.78238	-6.4769
149.9	8.91352	-12.2958	18.8485	-2.54036	-6.30264
151.899	8.8249	-11.8576	18.3275	-2.85959	-5.88732
153.897	8.68718	-12.2754	18.4935	-3.34528	-5.33068
155.896	8.22671	-14.2611	18.4544	-3.78945	-4.70584
157.895	6.77596	-13.7985	18.1509	-2.52118	-5.07651
159.893	5.14479	-12.5848	16.8393	-0.575332	-5.71364
161.892	4.72873	-13.9275	16.2264	-1.44823	-4.81131
163.891	4.82796	-12.6238	15.0113	-2.52904	-5.14734
165.889	5.11842	-9.52899	14.8549	-3.64224	-5.76884
167.888	5.97157	-9.4684	14.2804	-4.53839	-4.98853
169.887	6.78382	-8.06378	13.086	-5.07684	-5.51541
171.885	7.75184	-5.55905	12.1764	-4.86699	-5.89367
173.884	9.34828	-5.45629	11.4241	-3.66792	-6.97701
175.883	12.3377	-5.52642	10.5218	-3.38392	-7.59787
177.881	17.7267	-5.87242	9.5892	-4.17145	-7.78015
179.88	25.3917	-6.5408	7.67045	-5.68051	-7.86829
181.879	35.542	-6.5302	6.60604	-6.48669	-8.02582
183.877	47.242	-6.44209	5.29822	-6.3162	-7.93126
185.876	60.6296	-6.68139	3.91749	-5.60579	-7.9518
187.875	75.6704	-6.15684	2.53214	-5.57296	-8.53744
189.873	90.2385	-5.70468	1.98062	-7.0674	-8.08877
191.872	99.0255	-5.88149	1.2113	-8.34002	-6.89943
193.871	95.8238	-5.19296	0.63121	-8.9375	-5.42106
195.869	76.8727	-4.196	0.701908	-10.1593	-3.85101
197.868	56.4249	-3.84557	0.427092	-10.6943	-2.87912
199.867	46.2297	-5.14318	-1.7263	-10.7878	-2.04308
201.865	43.8427	-5.74519	-3.2819	-10.2826	-0.273859
203.864	42.3534	-7.06343	-3.5458	-10.6746	0.855399
205.863	39.2913	-7.28709	-3.19035	-10.218	1.96329
207.861	34.3931	-7.52705	-2.84315	-9.29223	2.40102
209.86	29.3182	-7.77278	-2.90536	-8.56895	1.90078
211.859	24.4923	-7.66354	-1.81018	-8.26564	1.03111
213.857	20.5009	-7.67921	-1.47385	-8.08465	-0.654357
215.856	16.4995	-7.28572	-1.41574	-8.38689	-1.8867
217.855	13.7637	-7.37683	-2.57984	-8.68059	-2.77084
219.853	11.8529	-7.62857	-2.60562	-9.58487	-3.88767
221.852	10.6178	-7.25086	-2.93074	-10.1467	-4.49712
223.851	10.5842	-7.05764	-3.96438	-10.6154	-5.22526
225.849	10.5837	-6.59102	-4.66491	-10.803	-6.12492
227.848	8.20596	-7.15835	-4.79417	-10.5816	-6.61162
229.847	5.96816	-7.94373	-4.90103	-10.6839	-6.43915
231.845	5.02298	-7.96267	-4.42792	-11.3013	-5.96288
233.844	6.54058	-8.02594	-4.38495	-12.3014	-6.32618
235.843	9.67127	-9.2171	-4.0331	-12.3397	-6.13998
237.841	13.94	-11.1509	-3.70709	-12.1362	-6.36303
239.84	19.5076	-12.9771	-2.8765	-11.9533	-6.27278
241.839	25.5414	-15.0258	-2.20003	-12.5652	-6.87719
243.837	29.3527	-15.898	-1.11607	-12.3309	-6.52189
245.836	30.263	-15.9364	0.139513	-12.0337	-6.28443
247.835	27.9389	-15.925	0.678299	-11.4735	-6.69191
249.833	25.7494	-16.1471	0.0838841	-11.6051	-6.19391
251.832	25.1559	-16.5321	-1.54788	-11.4361	-5.49741
253.831	24.6574	-16.6843	-3.06316	-11.1548	-5.51646
255.829	23.5121	-17.0853	-3.6461	-11.399	-4.40652
257.828	21.9072	-18.5909	-3.83805	-11.3243	-3.71223
259.827	20.6138	-18.5673	-4.10354	-10.7895	-2.89488
261.825	18.5805	-18.5356	-4.27508	-10.0554	-1.80393
263.824	16.4823	-18.5653	-4.44284	-9.45755	-0.353296
265.823	14.8464	-19.2984	-4.36509	-10.4932	1.42836
267.821	13.7664	-19.3332	-4.40208	-11.6677	4.21079
269.82	13.1008	-19.2908	-4.08319	-11.9274	7.62463
271.819	12.4908	-19.2912	-4.13814	-11.8075	11.5573
273.817	12.1786	-20.3254	-3.72502	-12.4788	15.8994
275.816	12.2726	-20.1327	-3.97717	-13.4279	20.6651
277.815	11.5987	-20.1059	-3.89844	-13.6827	20.8117
279.813	11.2254	-19.151	-3.37853	-13.6024	17.4153
281.812	10.6348	-18.6986	-2.99647	-13.7725	13.4263
283.811	10.2991	-17.7819	-3.13973	-13.8084	10.36
285.809	9.56931	-17.0655	-3.14879	-13.4546	8.79622
287.808	9.22671	-17.0839	-3.40669	-13.4238	6.94333
289.807	8.53722	-17.2383	-3.32026	-13.091	5.14894
291.805	7.87649	-17.4359	-3.70315	-13.0871	2.93551
293.804	7.42053	-18.0511	-3.82871	-12.3772	2.1185
295.803	7.19046	-17.6438	-3.9049	-11.4171	1.55663
297.801	6.96191	-17.4547	-4.05107	-10.896	1.93411
299.8	7.01107	-18.9161	-3.64077	-9.73279	4.23102
301.799	7.16895	-20.2926	-4.24062	-9.01885	10.1943
303.797	7.50849	-19.214	-3.64765	-8.85704	20.0614
305.796	7.8311	-19.7503	-3.56632	-8.82379	33.7253
307.795	7.13563	-19.7291	-3.6432	-9.53423	52.2611
309.793	5.59812	-17.6661	-3.02467	-10.3652	77.7534
311.792	4.02362	-19.4667	-3.19095	-10.608	110.381
313.791	2.63859	-18.8194	-3.03561	-10.582	149.47
315.789	2.19759	-20.1364	-2.94154	-10.8115	190.418
317.788	2.37005	-22.3217	-2.63431	-10.7915	226.401
319.787	2.40035	-21.6337	-1.90456	-10.7358	253.46
321.785	2.45291	-20.6848	-2.41882	-10.2439	268.596
323.784	1.97423	-21.3861	-2.35564	-9.55529	272.292
325.783	0.645875	-20.9342	-2.44804	-8.61145	272.033
327.781	-0.691239	-19.6381	-2.77963	-8.51219	268.3
329.78	-1.53892	-20.0459	-2.46169	-8.61846	258.229
331.779	-1.80822	-21.4714	-2.44797	-8.95213	244.11
333.777	-1.07556	-20.946	-2.46277	-9.05625	230.768
335.776	0.430589	-22.8187	-2.15471	-10.3358	219.168
337.775	2.96452	-22.7784	-2.2836	-11.3586	208.049
339.773	5.46104	-22.7044	-1.98125	-11.9229	196.371
341.772	7.88967	-22.9234	-1.72747	-12.2117	186.022
343.771	9.61196	-21.7928	-0.966658	-12.6414	178.482
345.769	11.2005	-22.1363	-2.38288	-12.8106	168.583
347.768	11.9063	-22.3715	-2.94203	-12.8752	157.976
349.767	12.7858	-24.101	-2.39027	-12.5109	145.356
351.765	13.1691	-24.9623	-1.94067	-12.4944	132.26
353.764	13.2996	-25.5926	-2.20412	-12.256	120.787
355.763	12.7915	-26.0661	-2.22655	-11.8275	109.2
357.761	12.7188	-26.5007	-2.30199	-12.012	96.7144
359.76	12.8979	-27.2184	-2.74923	-12.2901	85.9045
361.759	13.3666	-27.0896	-4.02816	-12.5148	76.2771
363.757	13.1861	-27.1926	-4.64396	-13.578	67.5331
365.756	13.0914	-27.7072	-4.93224	-14.717	58.0766
367.755	12.8944	-27.2535	-5.3813	-14.4584	50.1075
369.753	12.3387	-27.7236	-6.33959	-14.5687	41.0332
371.752	11.6168	-27.8076	-5.62141	-14.8298	32.9159
373.751	10.454	-27.8174	-5.8254	-14.8175	24.5421
375.75	9.40312	-27.7576	-6.64234	-14.7668	19.2517
377.748	7.98192	-26.9046	-7.36505	-14.8883	19.5464
379.747	6.3362	-26.1375	-7.24918	-13.9679	26.6216
381.746	4.42856	-24.4967	-7.92049	-13.0671	41.9265
383.744	3.15667	-22.797	-7.88108	-12.0211	69.8642
385.743	1.86025	-20.5308	-6.82631	-10.6235	113.359
387.742	1.20976	-17.8672	-7.59588	-9.2025	178.65
389.74	-0.020079	-15.3939	-7.5049	-9.10243	268.933
391.739	-1.28121	-12.8098	-7.40052	-9.06132	385.446
393.738	-2.50303	-16.3838	-8.05296	-9.06076	528.2
395.736	-2.24363	-21.5913	-8.95826	-8.16968	662.245
397.735	-1.4993	-22.881	-8.665	-6.77384	788.812
399.734	-1.02308	-20.2019	-8.76179	-5.75924	934.305
401.732	-1.94191	-12.7755	-8.59836	-5.88874	1100.03
403.731	-2.75147	-0.152529	-8.02309	-5.71753	1274.31
405.73	-3.94976	20.2569	-7.83504	-5.5279	1462.5
407.728	-5.16487	49.9227	-7.6895	-5.38716	1651
409.727	-6.08838	90.3802	-7.34151	-5.78668	1831.64
411.726	-7.07608	140.725	-7.16118	-7.65477	2028.6
413.724	-8.12072	198.973	-7.30088	-9.71102	2248.52
415.723	-8.95363	259.206	-7.35456	-11.3881	2479.85
417.722	-9.70074	298.378	-7.03015	-11.7458	2721.29
419.72	-10.2324	314.393	-6.17951	-12.0979	2962.7
421.719	-11.492	308.036	-5.53452	-11.8005	3209.4
423.718	-12.6465	284.041	-5.27013	-11.2637	3448.79
425.716	-14.1783	250.824	-4.85719	-10.7209	3654.44
427.715	-15.6185	207.65	-4.55083	-10.1046	3825.28
429.714	-17.1413	167.044	-4.3125	-8.46737	3929.59
431.712	-17.9538	135.636	-4.42406	-6.34339	3969.96
433.711	-17.8176	115.636	-4.21805	-3.81664	3969.18
435.71	-16.99	98.9164	-3.84964	-1.99277	3953.05
437.708	-15.8929	85.3226	-3.41947	-0.71569	3924.88
439.707	-15.3162	72.7485	-2.91836	-0.651441	3900.11
441.706	-14.7059	61.6061	-3.00681	0.486774	3872.37
443.704	-13.7166	52.8328	-3.15369	2.27708	3834.19
445.703	-12.5284	45.1857	-1.64063	4.96473	3769.42
447.702	-12.0013	37.7999	0.510633	7.11861	3678.5
449.7	-11.2321	32.1005	1.40815	7.88291	3581.39
451.699	-10.7103	24.867	1.67451	8.03817	3470.8
453.698	-9.5748	19.3382	0.875273	7.54333	3351.01
455.696	-8.40398	11.8463	-1.46507	5.90079	3249.64
457.695	-5.3299	4.98232	-1.57778	3.20594	3201.95
459.694	0	0	4.54747e-14	4.54747e-14	3192.78
461.692	9.4561	-4.8829	0.738181	-2.63639	3166.37
463.691	23.6579	-10.9287	0.473149	-4.62822	3121.96
465.69	43.3512	-12.5966	-1.15977	-6.4426	3073.17
467.688	69.1589	-12.4089	-3.2496	-7.47917	3018.54
469.687	98.2848	-11.1971	-3.11217	-8.5746	2966.05
471.686	126.686	-6.8986	-2.19138	-9.83479	2924.23
473.684	156.748	2.05015	-0.989587	-10.9477	2899.22
475.683	187.274	16.6677	-0.161515	-11.7744	2872.65
477.682	214.489	36.1981	0.534898	-12.3831	2856.88
479.68	227.593	61.5546	2.61979	-12.031	2846.86
481.679	211.001	104.11	4.95614	-11.7028	2833.42
483.678	176.838	168.255	8.24255	-11.6963	2826.99
485.676	134.652	251.586	10.9363	-12.298	2833.63
487.675	95.7071	356.373	14.1894	-13.2062	2860.91
489.674	79.508	468.179	18.2038	-13.7643	2891.78
491.672	69.467	589.754	21.9263	-14.0778	2925.39
493.671	64.3429	727.909	23.001	-14.7662	2970.5
495.67	63.9189	890.958	20.3353	-14.9193	3024.47
497.668	69.1268	1069.06	16.5016	-15.287	3076.5
499.667	80.4927	1250.81	11.7009	-15.4056	3121.67
501.666	98.4386	1443.55	8.95832	-16.5301	3163.84
503.664	121.707	1643.65	6.57549	-16.6389	3187.42
505.663	146.303	1850.48	3.75161	-17.2312	3197.02
507.662	163.207	2065.65	-0.346581	-17.3912	3201.97
509.66	150.128	2274.66	-3.29572	-17.6653	3196.72
511.659	121.845	2471.79	-4.24715	-17.8782	3163.89
513.658	89.4872	2640.14	-4.34849	-18.2809	3119.97
515.656	60.473	2764.13	-6.02207	-19.4347	3085.34
517.655	47.781	2841.82	-7.82557	-20.8452	3063.11
519.654	40.998	2896.2	-8.62961	-21.6613	3047.27
521.652	41.1081	2951.98	-8.90351	-22.3046	3032.78
523.651	50.6335	3020.14	-9.48947	-22.7256	3014.77
525.65	73.1429	3130.96	-8.72765	-22.5077	3001.48
527.648	112.207	3260.54	-8.05047	-23.0165	2989.05
529.647	170.323	3386.36	-7.03935	-23.2591	2979.88
531.646	251.733	3526.27	-5.90437	-22.6692	2976.44
533.644	356.298	3679.58	-5.10277	-22.5842	2968.06
535.643	481.579	3830.86	-4.96378	-22.388	2961.59
537.642	611.867	3973.69	-4.73062	-22.0621	2956.84
539.64	712.964	4129.71	-5.10822	-22.2495	2952.06
541.639	772.64	4267.34	-4.28804	-22.7697	2950.88
543.638	809.003	4381.59	-2.76038	-23.3879	2956.29
545.636	855.034	4495.95	-0.853667	-24.0266	2954.92
547.635	907.953	4631.39	-0.363193	-24.7114	2959
549.634	966.448	4778.11	-0.538171	-25.2907	2974.73
551.632	1018.76	4906.25	-1.20757	-26.3509	2990.59
553.631	1056.27	5030.37	-2.5239	-26.3023	3011.65
555.63	1088.13	5165.39	-4.11999	-26.5971	3021.72
557.628	1117.85	5314.41	-5.88151	-25.8826	3026.87
559.627	1151.01	5466.07	-7.73073	-25.8305	3036.02
561.626	1197.84	5578.62	-9.14407	-26.1208	3041.56
563.624	1248.67	5661.92	-9.56684	-26.5592	3044.73
565.623	1282.17	5739.51	-9.54315	-25.5332	3050.55
567.622	1290.51	5824.68	-9.92409	-24.9804	3062.4
569.62	1288.28	5919.75	-11.9516	-23.9856	3079.61
571.619	1292.37	6012.99	-12.7041	-22.1712	3098.16
573.618	1314.36	6086.67	-12.9666	-19.5162	3119.13
575.616	1363.69	6150.25	-12.4264	-15.6267	3142.06
577.615	1410.57	6221.59	-12.1889	-10.0564	3158.2
579.614	1441.27	6293.2	-11.4506	-3.47792	3158.63
581.612	1450.93	6365.05	-10.5484	2.33493	3145.41
583.611	1444.95	6443.38	-8.12701	4.56155	3121.25
585.61	1441.4	6487.62	-5.35204	-1.69489	3094.61
587.608	1450.85	6493.72	-2.99474	-11.0494	3070.85
589.607	1475.96	6483.31	1.19263	-18.1105	3051.65
591.606	1516.96	6460.53	7.33019	-19.899	3041.89
593.604	1542.94	6444.48	13.0497	-18.9382	3044.68
595.603	1576.51	6464.89	19.3514	-17.3102	3048.76
597.602	1603.81	6446.74	26.9356	-14.2864	3062.33
599.6	1628.7	6398.69	35.5839	-10.8752	3086.59
601.599	1670.95	6359.06	41.7182	-6.68061	3106.26
603.598	1733.9	6336.49	49.4033	-3.45467	3133.18
605.596	1824.95	6325.4	62.4034	-5.25006	3160.04
607.595	1944.67	6324.45	82.0707	-8.93415	3176.57
609.594	2066.63	6328.86	109.408	-11.8561	3182.18
611.592	2175.02	6365.81	143.215	-13.9345	3175.59
613.591	2257.02	6431.72	181.622	-17.4151	3167.99
615.59	2331.04	6495.84	215.641	-20.482	3159.85
617.588	2408.4	6560.37	240.239	-21.1085	3151.65
619.587	2491	6610.19	254.702	-20.8657	3141.28
621.586	2562.23	6639.35	263.05	-20.6507	3128.5
623.584	2631.79	6636.14	266.736	-21.0065	3120.55
625.583	2699.23	6603.43	267.438	-22.8173	3118.85
627.582	2756.55	6565.14	262.435	-24.7437	3118.36
629.58	2817.08	6496.98	254.531	-25.7037	3119.13
631.579	2872.22	6389.72	251.4	-25.9296	3136.2
633.578	2913.23	6276.05	254.766	-27.3585	3148.55
635.576	2959.04	6166.91	256.218	-28.7402	3159.18
637.575	3018.97	6083.43	252.783	-29.5598	3165.9
639.574	3086.58	6040.68	244.243	-30.5078	3168.85
641.572	3177.14	6006.62	231.491	-31.9736	3156.9
643.571	3275.84	5974.85	215.473	-32.8131	3147.46
645.57	3366.11	5940.5	199.586	-33.1977	3137.1
647.568	3428.3	5910.65	184.229	-33.4853	3130.37
649.567	3468.69	5890.23	168.838	-34.3579	3118.85
651.566	3493.55	5887.57	155.479	-35.0757	3105.26
653.564	3519.64	5872.73	146.889	-35.3972	3088.22
655.563	3560.92	5830.33	138.924	-36.0167	3069.93
657.562	3611.06	5758.9	129.482	-36.2183	3069.57
659.56	3679.18	5672.24	119.783	-36.8613	3088.46
661.559	3762.56	5574.19	109.129	-37.3615	3108.77
663.558	3840.38	5484.46	94.4488	-37.1275	3141.02
665.556	3916.08	5388.21	79.8306	-35.9043	3174
667.555	4002.5	5296.79	68.3225	-32.6257	3204.07
669.554	4085.34	5221.78	61.0046	-25.371	3226.66
671.552	4161.63	5173.02	52.0684	-12.6998	3236.31
673.551	4237.71	5178.05	42.8636	7.71862	3230.14
675.55	4303.48	5213.9	33.9218	35.97	3209.23
677.548	4361.74	5277.82	26.8922	73.7821	3171.88
679.547	4407.53	5363.95	20.1226	120.65	3132.38
681.546	4436.53	5441.87	14.1934	176.013	3102.73
683.544	4465.45	5511.51	12.3085	232.858	3096.63
685.543	4494.82	5564.97	17.2091	270.211	3112.44
687.542	4547.06	5575.36	32.9054	282.665	3149.33
689.54	4601.91	5532.08	62.5558	279.554	3191.04
691.539	4647.48	5457.79	111.764	268.416	3233.24
693.538	4661.82	5372.4	185.519	253.088	3272.75
695.536	4663.66	5287.59	290.426	237.672	3309.93
697.535	4671.66	5265.15	431.43	228.123	3334.6
699.534	4685.89	5237.43	612.417	218.576	3348.15
701.532	4711.44	5185.07	811.733	204.727	3349.43
703.531	4736.9	5137.3	1013.91	192.508	3327.87
705.53	4766.89	5101.72	1234.68	179.891	3306.56
707.528	4803.62	5087.01	1460.04	170.358	3297.61
709.527	4828.23	5079.2	1698.69	163.72	3298.76
711.526	4837.41	5079.25	1959.48	155.241	3300.15
713.524	4857.59	5086.44	2235.16	147.228	3298.01
715.523	4893.26	5060.41	2514.95	134.646	3301.88
717.522	4967.71	5020.95	2785.95	119.672	3320.17
719.52	5036.85	4986.35	3049.02	106.365	3323.57
721.519	5094.43	4954.76	3336.02	97.2317	3305.92
723.518	5147.59	4884.65	3640.75	90.7202	3294.54
725.516	5183.88	4776.98	3952.87	81.3334	3292.76
727.515	5205.61	4660.51	4279.52	70.71	3300.61
729.514	5229.6	4541.84	4618.57	63.1991	3317.07
731.512	5254.01	4468.87	4942.53	61.3735	3335.46
733.511	5305.66	4425.73	5261.74	66.7834	3346.53
735.51	5345.58	4374.42	5582.97	82.768	3348.84
737.508	5348.47	4322.7	5894.46	106.844	3354.53
739.507	5323.87	4280.88	6206.58	138.638	3369.42
741.506	5294.96	4234.75	6492.17	175.812	3381.3
743.504	5264.31	4169.39	6724.64	208.732	3386.08
745.503	5225.83	4098.75	6912.64	238.375	3380.46
747.502	5190.85	4029.48	7062.9	260.225	3375.98
749.5	5155.91	3966.1	7163.82	261.797	3373.83
751.499	5143	3905.63	7227.27	261.764	3369.32
753.498	5127.08	3869.43	7273.69	272.302	3364.02
755.496	5095.75	3864.91	7313.5	312.28	3358.45
757.495	5066.26	3863.42	7352.73	394.377	3328.36
759.494	5044.38	3844.77	7373.58	529.281	3284.7
761.492	5003.25	3823.46	7397.72	698.846	3244.69
763.491	4944.92	3801.38	7422.14	886.514	3217.12
765.49	4888.14	3775.98	7446.66	1089.84	3217.22
767.488	4816.86	3747.25	7481.67	1306.38	3241.59
769.487	4745.14	3702.82	7524.35	1534.81	3274.94
771.486	4670.56	3642.59	7563.68	1782.05	3322.11
773.484	4600.02	3568.99	7596.7	2036.53	3357.1
775.483	4524.13	3500.72	7639.43	2286.03	3377.69
777.482	4453.84	3428.05	7689.75	2539.6	3414.65
779.48	4395.67	3370.18	7717.49	2798.34	3479.31
781.479	4340.47	3363.41	7730.87	3047.8	3586.2
783.478	4302.11	3334.84	7742.88	3300.83	3764.95
785.476	4269.66	3301.33	7732.9	3555.77	4036.65
787.475	4235.45	3274.58	7709.54	3790.48	4441.02
789.474	4214.95	3215.11	7666.58	3986.39	4910.11
791.472	4187.22	3146.55	7608.84	4156.19	5376.4
793.471	4150.22	3081.7	7530.46	4323.62	5843.04
795.47	4117.14	3018.78	7452.13	4507.76	6287.05
797.468	4094.75	2959.24	7386.56	4716.3	6663.86
799.467	4087.81	2910.4	7354.58	4936.36	6991.88
801.466	4088.07	2886.41	7329.2	5160.99	7295.3
803.464	4103.14	2873.94	7308	5394.45	7616.69
805.463	4139.9	2865.82	7285.62	5625.66	8003.58
807.462	4193.57	2873.11	7259.36	5858.85	8447.7
809.46	4249.65	2876.61	7219.23	6068.52	8907.08
811.459	4293.18	2871.81	7191.82	6232.89	9404.81
813.458	4301.36	2849.62	7145.48	6342.52	9931.5
815.456	4296.81	2816.03	7093.02	6413.44	10486.5
817.455	4296.78	2778.57	7061.1	6469.98	10966.4
819.454	4307.3	2743.9	7042.35	6519.37	11350.7
821.452	4350.77	2725.08	7049.16	6576.39	11641.6
823.451	4408.07	2706.06	7051.67	6598.71	11845.9
825.45	4454.3	2690.5	7071.84	6590.64	11987.8
827.448	4462.8	2682.18	7107.7	6563.91	12090.5
829.447	4449.14	2670.54	7161.12	6517.62	12168.3
831.446	4425.75	2650.49	7194.99	6450.79	12228.8
833.444	4394.13	2636.96	7207	6381.17	12301.4
835.443	4365.72	2627.2	7200.9	6315.78	12398.4
837.442	4326.59	2617.76	7194.73	6243.59	12462.2
839.44	4285.45	2601.25	7187.74	6156.76	12438.7
841.439	4235.4	2581.51	7186.2	6060.23	12341.3
843.438	4186.98	2565.05	7178.02	5975.02	12195.7
845.436	4143.7	2544.83	7140.8	5895.19	12023.2
847.435	4072.34	2539.58	7091.57	5807.72	11844.9
849.434	3992.23	2550.42	7024.03	5719.81	11706.6
851.432	3903.41	2571.62	6911.48	5628.79	11626.2
853.431	3840.01	2574.31	6782.73	5533	11556.2
855.43	3828.86	2561.17	6659.82	5439.94	11515
857.428	3833.1	2538.37	6557.9	5354.88	11518.8
859.427	3854.82	2512.68	6481.15	5275.69	11583.9
861.426	3877.12	2459.97	6420.78	5177.78	11653.4
863.424	3914.16	2401.85	6353.21	5039.94	11735.7
865.423	3959.65	2359.97	6282.92	4877.72	11824.3
867.422	3992.23	2342.92	6218.65	4705.04	11914.2
869.42	3976.63	2392.81	6167.31	4544.77	12018.3
871.419	3934.34	2543.13	6132.11	4417.57	12130.5
873.418	3882.55	2844.75	6117.25	4337.54	12217.9
875.416	3816.58	3381.71	6133.24	4279.99	12259.9
877.415	3756.87	4009.5	6155.49	4228.67	12286
879.414	3697.03	4617.95	6170.06	4178.64	12330.2
881.412	3632.23	5204.02	6175.07	4130.8	12404.1
883.411	3564.32	5802.46	6182.88	4096.15	12528.5
885.41	3496.95	6435.83	6185.42	4050.83	12689.9
887.408	3440.73	7121.64	6163.15	3989.11	12778.5
889.407	3441.08	7874.55	6118.41	3929.13	12780.8
891.406	3470.06	8606.75	6053.17	3878.58	12692.3
893.404	3488.07	9279.22	5973.13	3827.92	12521.2
895.403	3486.52	9877.96	5882.9	3773.64	12301.8
897.402	3470.92	10385.5	5798.73	3711.86	12072.5
899.4	3443.27	10810	5722.01	3662.54	11847.5
901.399	3415.82	11161.5	5639.87	3624.55	11660.4
903.398	3395.95	11465.3	5563.87	3595.19	11552.9
905.396	3406.18	11773.2	5504.26	3581.42	11551.6
907.395	3399.41	12143.1	5489.91	3569.97	11740
909.394	3356.87	12591.7	5512.77	3556.89	11925.1
911.392	3304.74	13123.4	5552.78	3550.07	12104.9
913.391	3263.89	13717.3	5597.53	3539	12247
915.39	3221.24	14386.1	5629.47	3510.37	12349.4
917.388	3171.49	15056.7	5625.12	3470.72	12399
919.387	3125.25	15647.8	5602.95	3430.32	12412.2
921.386	3085.82	16148.9	5566.73	3393.4	12412
923.384	3045.79	16546.9	5496.56	3361.58	12423.8
925.383	3034.16	16835	5381.41	3335.57	12483.4
927.382	3034.5	17008.7	5263.95	3317.95	12637.3
929.38	3038.67	17070	5157.4	3317.78	12978.1
931.379	3049.41	17036.8	5091.03	3325.08	13503.7
933.378	3059.69	16904.6	5045.94	3327.99	14018.9
935.376	3072.53	16701.4	5013.81	3325.68	14471.2
937.375	3098.29	16417.2	4980.18	3321.07	14864.1
939.374	3091.86	16090	4949.27	3322.16	15192.7
941.372	3060.07	15695.2	4892.26	3321.18	15451.5
943.371	3016.98	15225.8	4805.28	3309.85	15613.3
945.37	2966.28	14754	4708.23	3300.06	15647.1
947.368	2931.8	14343.3	4606.19	3297.07	15554.2
949.367	2893.41	14071.6	4526.58	3298.73	15349
951.366	2856.67	14022.7	4457.29	3304.34	15046.9
953.364	2821.83	14222	4398.25	3311.48	14638
955.363	2795.52	14310.5	4361.5	3323.73	14119.9
957.362	2754.38	14489.3	4320.48	3332.04	13533.2
959.36	2710.13	14645.9	4276.27	3338.06	12932.4
961.359	2667.17	14830.4	4244.74	3347.7	12255.4
963.358	2631.73	15038.9	4249.22	3361.66	11388.9
965.356	2600.18	15304.8	4296.74	3360.66	10364.9
967.355	2584.1	15629.3	4392.71	3348.7	9199.82
969.354	2573.07	15980.6	4515.6	3343.1	7981.85
971.352	2565.71	16310.3	4697.17	3349.5	6800.36
973.351	2570.23	16628	4946.22	3351.33	5894.73
975.35	2596.83	16945	5252.38	3342.9	5566.15
977.348	2638.96	17280.7	5605.25	3336.85	5113.83
979.347	2686.15	17626.2	5974.59	3338.41	4386.55
981.346	2730.55	17900.9	6268.04	3328.79	3828.53
983.344	2772.6	18099.4	6459.76	3307.34	3734.77
985.343	2808.14	18223	6548.05	3288.65	3452.84
987.342	2796.74	18272.7	6531.13	3272.31	3229.75
989.34	2748.2	18256.5	6409.16	3261.46	3485.8
991.339	2696.09	18163.5	6164.89	3259.98	3805.28
993.338	2638.5	17973.1	5783.2	3271.86	4321.94
995.336	2605.78	17633.8	5257.59	3275.95	5283.25
997.335	2576.25	17088.7	4600.99	3266.08	6331.59
999.334	2545.85	16312.2	3860.97	3260.35	7426.56
1001.33	2516.9	15254.1	3118.56	3263.31	8434.26
1003.33	2492.76	13929.6	2449.34	3272.99	9337.38
1005.33	2471.86	12385.6	1965.51	3284.92	10178.5
1007.33	2451.02	10728.8	1596.25	3305.82	10955.3
1009.33	2437.01	9066.64	1287.45	3337.77	11694.8
1011.33	2441.36	7388.58	1033.48	3368.2	12410.4
1013.32	2460.19	5891.04	844.044	3397.99	13120.9
1015.32	2509.39	4992.05	685.04	3434.77	13782
1017.32	2557.74	4371.83	555.096	3475.85	14310.2
1019.32	2589.33	3813.03	449.002	3529.49	14727.1
1021.32	2596.29	3654.06	366.148	3617.3	15038.9
1023.32	2601.64	3597.22	322.293	3744.97	15240.9
1025.32	2603.45	3911.66	328.876	3896.86	15341.6
1027.32	2606.21	4429.27	405.439	4035.96	15335.9
1029.31	2606.99	5289.68	581.415	4102.14	15225.7
1031.31	2581.1	6235.78	891.986	4086.83	14992.9
1033.31	2547.18	7193.32	1374.9	3976.67	14600.8
1035.31	2512.33	8108.45	2065.5	3756.78	14052.9
1037.31	2493.03	8967.85	2985.5	3435.85	13371.3
1039.31	2511.35	9758.49	4139.88	3024.1	12619.1
1041.31	2529.5	10472.6	5438.4	2523.21	11928.1
1043.3	2537.81	11125.8	6628.9	1975.98	11425.1
1045.3	2536.44	11727.3	7692.09	1483.72	10998.3
1047.3	2543.17	12273.4	8675.49	1144.77	10569.4
1049.3	2557.22	12772	9570.57	942.778	10116
1051.3	2558.76	13226.5	10384.5	767.956	9708.47
1053.3	2563.31	13609.1	11137	629.814	9393.5
1055.3	2569.51	13901.5	11842.7	539.643	9172.14
1057.3	2588.99	14098.4	12513.8	511.742	8976.82
1059.29	2598.08	14188.4	13156.5	564.915	8822.27
1061.29	2601.38	14161.3	13704.2	731.649	8737.78
1063.29	2600.72	14011.6	14136.4	1043.3	8684.06
1065.29	2598.42	13735.8	14440	1536.82	8626.87
1067.29	2592.63	13324.8	14629.4	2244.52	8569.76
1069.29	2617.06	12793.2	14723.9	3183.79	8500.43
1071.29	2632.32	12188.3	14749.1	4356.09	8427.62
1073.28	2644.13	11581.6	14716.7	5587.02	8353.11
1075.28	2662.13	11045.8	14658.2	6721.83	8242.8
1077.28	2669.4	10700.1	14626.7	7774.22	8105.29
1079.28	2637.4	10478.7	14643.1	8726.83	7947.71
1081.28	2584.36	10321.9	14626.8	9571.77	7784.82
1083.28	2519.87	10168.3	14550	10313.1	7614.75
1085.28	2458.02	9998.15	14415.3	10946.1	7450.4
1087.28	2434.1	9795.68	14233.6	11469.4	7280.3
1089.27	2447.39	9562.85	14013.5	11900	7125.11
1091.27	2477.25	9284.51	13772.9	12255.4	7013.31
1093.27	2524.57	8971.21	13543.7	12564.7	6955.14
1095.27	2593.45	8636.04	13357.6	12864	6973.48
1097.27	2661.35	8322.02	13256.8	13180	7028.21
1099.27	2739.59	8063.78	13223.3	13523.6	7079.04
1101.27	2819.01	7853.76	13224.2	13836	7103.86
1103.26	2843.94	7778.38	13299.7	14113	7128.98
1105.26	2800.11	7899.9	13415.6	14307.3	7163.84
1107.26	2690.74	8145.83	13540.4	14439.2	7251.98
1109.26	2529.83	8418.56	13673.7	14540.9	7393.23
1111.26	2322.13	8706.52	13839.1	14655.7	7580.73
1113.26	2087.77	8982.79	14051.9	14808.9	7736.51
1115.26	1852.38	9229.37	14313.1	15022	7874.86
1117.26	1679.34	9425.5	14597.1	15263.9	8010.12
1119.25	1632.75	9558.3	14808.4	15438.6	8160.16
1121.25	1793.9	9619.58	14929.6	15547.2	8351.09
1123.25	2192.04	9597.38	14947.3	15588.7	8592.64
1125.25	2766.71	9496.84	14865.2	15561.8	8827.05
1127.25	3520.07	9326.13	14680.3	15449.6	9023.39
1129.25	4306.52	9077.84	14394.8	15224	9171.19
1131.25	5093.55	8746.69	14013.7	14921	9249.4
1133.24	5878.92	8357.14	13559.2	14577.9	9256.05
1135.24	6671.7	7932.16	13078.4	14215.6	9186.15
1137.24	7475.94	7463.04	12619.7	13890.7	9050.17
1139.24	8317.62	6934.45	12255.8	13730.7	8859.81
1141.24	9203.86	6363.12	12015.2	13602.2	8629.08
1143.24	10106.4	5785.92	11851.1	13563.6	8397.29
1145.24	10888.8	5268.11	11730.9	13630.8	8243.74
1147.24	11463.4	4892.57	11643	13835.1	8190.88
1149.23	11901.2	4741.15	11619.6	14164.3	8188.73
1151.23	12217.9	4866.45	11700.1	14507.8	8211.28
1153.23	12424.1	5068.6	11861.7	14803.3	8258.93
1155.23	12544	5318.1	12032.6	15042.1	8344.99
1157.23	12615.8	5596.59	12194.3	15222	8476.61
1159.23	12683.1	5904.26	12346	15343.3	8652.49
1161.23	12740.8	6246.87	12494.1	15421	8835.56
1163.22	12813.8	6614.29	12610.1	15486.8	8961.25
1165.22	12801.7	7000.35	12640.4	15567.1	9023.9
1167.22	12696.2	7385.79	12566.7	15682.7	9014.17
1169.22	12513.6	7771.75	12398.6	15879.8	8945.72
1171.22	12264.1	8159.32	12154.4	16178.7	8845.94
1173.22	11950.4	8545.68	11857.2	16407.6	8728.6
1175.22	11594	8940.58	11513	16547.6	8621.36
1177.22	11245.6	9340.57	11169.7	16600	8540.09
1179.21	10978.8	9744.18	10929.5	16561	8458.59
1181.21	10905.9	10144.1	10756.9	16431.5	8324.63
1183.21	11131	10527.8	10587.8	16214.3	8159.46
1185.21	11356.8	10910.5	10438.2	15912	7981.12
1187.21	11565.8	11305.7	10338.9	15549.6	7816.2
1189.21	11761.8	11698.7	10286.6	15157.4	7652.19
1191.21	11935.2	12084.2	10268.1	14790.6	7478.13
1193.2	12057.6	12476.1	10210.8	14550.8	7293.62
1195.2	12137.2	12892.9	10129	14314.8	7099.87
1197.2	12193.9	13336.7	10036.5	14031.2	6926.3
1199.2	12241.5	13707.8	9957.24	13693.5	6756.3
1201.2	12275.4	14002.2	9908.88	13329.2	6560.72
1203.2	12299.4	14217.3	9916.93	12951.8	6307.42
1205.2	12349.7	14349.8	10011.9	12605.6	6008.71
1207.2	12381.2	14390.8	10213.3	12352.6	5694.68
1209.19	12361.3	14325.4	10447.7	12250.3	5402.46
1211.19	12301.3	14165.4	10701.2	12312.1	5181
1213.19	12200.4	13938.7	10923.4	12362.3	5089.04
1215.19	12073.1	13648.4	11083.2	12395.3	5092.16
1217.19	11901.8	13350.5	11183.7	12417.9	5157.27
1219.19	11688.8	13130.3	11249.2	12398.6	5256.4
1221.19	11451.8	12914.5	11314	12297	5353.3
1223.18	11236.1	12668.5	11412.5	12120.3	5456.83
1225.18	11124.4	12428.6	11559.2	11869.3	5588.33
1227.18	11167.5	12208.5	11801.6	11567.3	5745.18
1229.18	11391.3	12035	12096.7	11233.6	5919.53
1231.18	11711.4	11962.8	12352.3	10919.3	6123.49
1233.18	11988.2	11896	12581.8	10681.2	6371.16
1235.18	12207.4	11806.7	12796.6	10625.8	6647.36
1237.18	12371.2	11691.6	13001.9	10731.3	6899.09
1239.17	12469.1	11558.8	13119	10924.7	7088.98
1241.17	12486.7	11419.4	13129.7	11185.2	7205.91
1243.17	12449.7	11277.1	13035.9	11451.2	7255.23
1245.17	12365.8	11145.9	12836.6	11694.1	7241.89
1247.17	12229.9	11042.8	12537.8	11878	7158.97
1249.17	12078.8	10926	12149.6	11979.1	7024.94
1251.17	11906.8	10733.1	11704.3	11999.1	6861.08
1253.16	11664	10446.3	11260.5	11933	6671.8
1255.16	11351.7	10046.9	10892.8	11778.9	6496.88
1257.16	10982.5	9514.64	10663.9	11525.9	6367.16
1259.16	10615.4	8845.52	10492.4	11178.5	6250.09
1261.16	10307.4	8040.75	10315.9	10764.5	6174.62
1263.16	10026.3	7125.25	10115.5	10318	6163.74
1265.16	9798.93	6142.2	9880.55	9903.98	6240.82
1267.16	9650.1	5160.38	9631.11	9633.28	6398.74
1269.15	9618.19	4247.2	9398.54	9611.72	6607.09
1271.15	9720.93	3440.59	9191.84	9487.67	6832.77
1273.15	9980.03	2784.16	8976.7	9471.22	7036.22
1275.15	10359.1	2261.97	8739.25	9446.61	7219.71
1277.15	10799.4	1960.95	8493.56	9505.17	7372.53
1279.15	11235.4	1847.99	8241.2	9568.01	7475.11
1281.15	11601.2	1887.99	7997.94	9627.28	7552.61
1283.14	11882.4	2096.29	7786.91	9673.84	7633.59
1285.14	12072.4	2474.28	7645.28	9711.05	7677.73
1287.14	12163	3019.82	7553.74	9740.87	7675.92
1289.14	12157.6	3636.47	7480.69	9733.26	7623.62
1291.14	12082	4213.61	7408.98	9665.02	7557.05
1293.14	11983.8	4735.67	7338.88	9559.44	7494.42
1295.14	11873.7	5202.74	7269.79	9446.82	7443.51
1297.14	11803.1	5592.68	7162.84	9354.62	7419.74
1299.13	11814.6	5873.39	7014.63	9319	7382.12
1301.13	11988.5	6026.44	6834.76	9409.67	7293.38
1303.13	12228.6	6035.61	6644.45	9588.27	7149.43
1305.13	12494.4	5891.83	6456.39	9837.78	6965.18
1307.13	12785	5592.19	6276.9	10107.5	6746.9
1309.13	13101.5	5144.32	6104.83	10335.4	6524.62
1311.13	13434.8	4557.69	5927.63	10507.3	6332.73
1313.12	13790.8	3862.42	5756.26	10604.4	6211.65
1315.12	14190.4	3148.01	5613.21	10614.1	6141.87
1317.12	14646.5	2507.33	5524.69	10546.5	6116.38
1319.12	15065.9	2078.25	5497.41	10415.7	6158.4
1321.12	15401.3	1711.37	5500.56	10230.6	6189.13
1323.12	15637.2	1420.01	5537.37	10029.1	6172.57
1325.12	15769.7	1208.35	5618.9	9844.89	6121.78
1327.12	15805.1	1120.25	5743.37	9720.56	6055.57
1329.11	15748.4	1153.88	5889.61	9701.21	5990.78
1331.11	15613.3	1299.26	6041.08	9757.59	5950.34
1333.11	15406.2	1561.67	6193.73	9828.41	5967.48
1335.11	15177.9	1946.91	6328.9	9924.56	6064.73
1337.11	14983.3	2407.57	6431.5	10041.7	6138.06
1339.11	14903.7	2876.51	6495.47	10190.4	6188.31
1341.11	14927.5	3339.89	6522.32	10371.2	6232.36
1343.1	15024.5	3795.47	6520.5	10491.9	6268.1
1345.1	15182.8	4236.59	6509.63	10523.2	6278.6
1347.1	15347.4	4655.56	6504.3	10442.2	6262.48
1349.1	15494.1	5045.8	6518.12	10238.4	6235.11
1351.1	15561.2	5404.8	6565.82	9906.91	6212.56
1353.1	15502.2	5731.49	6645.26	9440.4	6201.65
1355.1	15301.9	6023.8	6756.12	8848.44	6210.74
1357.1	14918.2	6280.19	6895.05	8144.43	6260
1359.09	14335.5	6491.26	7021.98	7369.7	6359.07
1361.09	13514.7	6663.45	7129.26	6631.57	6475.9
1363.09	12432	6811.58	7213.34	6038.16	6594.55
1365.09	11111	6956.38	7266.1	5561.66	6718.74
1367.09	9611.13	7102.83	7287.73	5275.4	6833.13
1369.09	8042.1	7207.89	7290.37	5210.73	6882.54
1371.09	6675.75	7265.63	7294.38	5426.88	6862.33
1373.08	5673.77	7285.55	7324.85	5683.41	6765.26
1375.08	4766.54	7276.35	7412.51	5987.27	6609.15
1377.08	4336.83	7234.84	7564.18	6280	6395.88
1379.08	3915.45	7147.31	7799.11	6562.51	6140
1381.08	3521.55	7016.58	8130.09	6825.82	5859.68
1383.08	3546.36	6852.24	8513.92	7074.68	5584.67
1385.08	3632.87	6660.42	8915.75	7289.41	5377.72
1387.08	3968.75	6460.54	9329.82	7433.36	5289.42
1389.07	4583.98	6275.66	9723.44	7487.73	5350.28
1391.07	5260.81	6092.55	10053.1	7454.32	5564.13
1393.07	5961.81	5872.01	10295.2	7366.44	5941.12
1395.07	6673.75	5602.72	10417.6	7237.18	6297.65
1397.07	7377.85	5289.35	10436.4	7081.76	6598.14
1399.07	8042.46	4943.45	10343.4	6916.89	6843.28
1401.07	8643.93	4591.25	10126.5	6789.86	7033.45
1403.06	9173.42	4269.69	9800.36	6712.24	7163.93
1405.06	9613.38	4018.39	9376.24	6685.73	7240.94
1407.06	9952.24	3865.76	8890.61	6664.1	7274.07
1409.06	10191.6	3789.01	8419.95	6647.56	7276.79
1411.06	10340.9	3795.8	8058.43	6643.96	7263.99
1413.06	10412.1	3903.16	7957.71	6629.88	7267.24
1415.06	10422.1	4114.61	8256.8	6615.39	7326.37
1417.06	10383	4408.46	8341.12	6598.87	7432.27
1419.05	10307.5	4740.33	8290.87	6595.17	7539.65
1421.05	10222	5078.78	8420.93	6623.65	7575.64
1423.05	10156.1	5408.86	8301.03	6715.79	7546
1425.05	10157	5717.45	8145.71	6887.94	7463.8
1427.05	10256.4	6000.76	8059.81	7104.15	7363.76
1429.05	10385.9	6244.89	7828.37	7303.05	7253.27
1431.05	10509.3	6451.3	7689.65	7456.89	7147.1
1433.04	10564.7	6625.12	7464.63	7541.89	7022.54
1435.04	10513.9	6759.35	7306.62	7556.47	6887.87
1437.04	10346.6	6864.05	7156.31	7507.74	6713
1439.04	10057.4	6945.32	7027.78	7412.82	6495.12
1441.04	9656.42	6993.89	6950.17	7299.38	6253.16
1443.04	9144.2	7021.05	6901.7	7197.28	6025.46
1445.04	8568.55	7033.09	6884.42	7150.98	5855.09
1447.04	7991.86	7038.78	6891.72	7243.4	5800.38
1449.03	7574.8	7053.51	6895.32	7460.32	5880
1451.03	7294.93	7044.85	6881.55	7671.4	6109.01
1453.03	7010.48	7018.39	6842.17	7870.48	6487.23
1455.03	6771.57	6988.65	6778.35	8059.75	6951.15
1457.03	6557.38	6956.63	6696.3	8206.76	7422.82
1459.03	6360.15	6934.11	6600.39	8288.23	7866.29
1461.03	6183.34	6922.39	6505.79	8298.29	8237.48
1463.02	6037.77	6915.42	6414.36	8239.48	8516.1
1465.02	5928.43	6897.56	6337.01	8113.29	8681.19
1467.02	5825.18	6856.8	6260.42	7921.99	8728.21
1469.02	5719.06	6804.82	6177.08	7667.71	8662.29
1471.02	5653.2	6756.25	6092.73	7354.96	8500.13
1473.02	5624.54	6720.76	6010.27	6990.55	8262.26
1475.02	5612.67	6717.39	5935.52	6576.34	7960.94
1477.02	5630.68	6767.78	5860.67	6094.72	7611.19
1479.01	5679.98	6872.53	5742.56	5584.9	7250.59
1481.01	5767.13	6972.68	5564.62	5114.15	6938.54
1483.01	5891.41	7063.27	5316.17	4705.45	6709.19
1485.01	6021.02	7131.57	5004.19	4433.39	6629.79
1487.01	6145.86	7168.78	4626.16	4393.96	6610.56
1489.01	6267.73	7170.66	4186.08	4431.53	6571.14
1491.01	6385.15	7145.13	3713.28	4522.77	6493.93
1493	6486.88	7102.65	3255.13	4699.22	6393.88
1495	6548.11	7055.1	2865.68	4989.86	6277.28
1497	6547.7	7009.88	2613.34	5423.5	6158.53
1499	6480.81	6983.82	2566.9	5945.62	6056.75
1501	6351.72	6985.41	2787.34	6455.74	5987.71
1503	6151.33	6995.21	3144.21	6927.45	5965.71
1505	5896.61	7018.6	3517.33	7332.22	6005.07
1507	5600.51	7061.37	3875.11	7671.32	6111.49
1508.99	5288.84	7131.61	4202.09	7938.99	6187.02
1510.99	4980.59	7216.29	4495.45	8140.26	6226.29
1512.99	4710.99	7312.1	4752.08	8269.14	6251.05
1514.99	4529.52	7407.25	4972.29	8335.72	6269.52
1516.99	4496.85	7469.55	5163.02	8358.12	6313.42
1518.99	4654.81	7468.28	5329.69	8348.75	6405.56
1520.99	4830.43	7383.66	5481.49	8320.57	6552.67
1522.98	5008.02	7191.41	5633.5	8294.52	6723.99
1524.98	5173.1	6864.55	5797.21	8243.26	6863.09
1526.98	5291.63	6399.08	5985.11	8197.23	6961.14
1528.98	5355.32	5793.96	6192.97	8207.99	7017.63
1530.98	5364.45	5069.22	6413.53	8316.29	7039.81
1532.98	5344.77	4277.25	6611.26	8541.38	7059.76
1534.98	5321.21	3512.75	6784.28	8961.95	7091.96
1536.98	5302.77	2873.8	6937.97	9525.43	7151.18
1538.97	5301.69	2463.44	7077.67	10040.2	7230.87
1540.97	5303.81	2227.28	7205.4	10474.5	7309.92
1542.97	5313.75	2187.6	7306.44	10811.7	7382.59
1544.97	5369.57	2361.03	7352.43	11041.8	7422.03
1546.97	5467	2696.7	7333.81	11147	7424.1
1548.97	5592.22	3170.92	7256.86	11113.2	7389.49
1550.97	5750.8	3643.54	7139.08	10922.9	7323.04
1552.96	5945.67	4055.63	6994.71	10572	7219.67
1554.96	6172.16	4385.74	6828.73	10045.3	7083.54
1556.96	6421.64	4598.93	6662.12	9362.18	6913.65
1558.96	6632.41	4673.29	6505.15	8558.41	6715.31
1560.96	6797.14	4606.49	6369.37	7723.15	6519.86
1562.96	6915.1	4384.84	6272.02	6992.62	6358.87
1564.96	6991.35	4007.44	6229.49	6535.81	6273.19
1566.96	7016.66	3484.92	6262.9	6192.99	6312.96
1568.95	6928.38	2878.48	6327.87	6060.25	6428.86
1570.95	6732.9	2248.48	6407.84	6124.6	6543.42
1572.95	6447.72	1699.07	6504.6	6244.24	6645.87
1574.95	6107.41	1327.92	6626.42	6345.43	6732.73
1576.95	5755.9	1063.38	6778.72	6413.5	6812.06
1578.95	5438.4	901.398	6954.32	6441.05	6894.75
1580.95	5252.75	794.886	7157.7	6422.72	6976.82
1582.94	5187.32	765.206	7346.71	6370.74	7000.64
1584.94	5155.11	824.247	7500.55	6315.11	6963.4
1586.94	5088.53	989.33	7605.79	6281.24	6891.91
1588.94	4993.77	1273.87	7668.91	6281.84	6817.5
1590.94	4838.94	1683.53	7699.59	6320.7	6756.2
1592.94	4683.95	2215.34	7701.46	6369.3	6721.27
1594.94	4538.28	2781.49	7683.4	6416.49	6711.34
1596.94	4451.35	3300.82	7639.91	6447.22	6709.46
1598.93	4405.54	3770.79	7550.33	6462.99	6726.71
1600.93	4436.56	4177.86	7395.25	6468.21	6766.43
1602.93	4564.36	4492.14	7167.14	6465.27	6820.96
1604.93	4823	4700.08	6861.29	6455.26	6871.68
1606.93	5173.98	4792.09	6473.91	6449.54	6906.97
1608.93	5565.76	4760.2	6019.59	6450.57	6922.7
1610.93	5999.78	4603.31	5521.99	6467.71	6916.35
1612.92	6460.06	4337.69	5011.6	6492.69	6873.07
1614.92	6849.16	3990.93	4550.94	6489.4	6784.75
1616.92	7153.2	3582.65	4202.86	6420.47	6654.81
1618.92	7363.83	3151.68	3988.63	6286.68	6492.61
1620.92	7481.01	2754.63	3925.32	6107.7	6308.81
1622.92	7513.72	2470.98	3956.37	5907.63	6136.43
1624.92	7483.1	2404.02	4085.13	5699.91	5992.98
1626.92	7410.59	2535.82	4267.2	5535.47	5850.19
1628.91	7301.17	2842.98	4468.02	5461.24	5720.79
1630.91	7177.67	3332.38	4645.69	5421.68	5648.75
1632.91	7079.98	3879.61	4802.18	5397.43	5629.79
1634.91	6993.58	4453.42	4946.39	5412.51	5643.24
1636.91	6873.37	5022.18	5094.36	5474.07	5706.06
1638.91	6722.01	5572.04	5249.91	5569.86	5822.29
1640.91	6513.38	6098.45	5423.08	5688.1	6015.46
1642.9	6247.64	6586.87	5601.81	5814.86	6272.63
1644.9	5920.53	7030.07	5779.99	5947.12	6494.17
1646.9	5549.72	7422.42	5963.57	6086.47	6657.94
1648.9	5169.3	7754.72	6138.46	6225.51	6764.87
1650.9	4802.44	8021.2	6310.76	6330.63	6817.1
1652.9	4475.5	8214.51	6469.92	6397.28	6821.77
1654.9	4250.35	8314.61	6601.11	6438.04	6795.59
1656.9	4197.5	8296.32	6699.51	6477.35	6745.33
1658.89	4340.22	8171.11	6760.68	6538.17	6680.5
1660.89	4500.31	7965.48	6776.36	6647.66	6573.17
1662.89	4658.87	7718.91	6740.11	6825.69	6435.58
1664.89	4811.32	7463.55	6657.66	7028.49	6276.6
1666.89	4951.27	7237.37	6523.05	7184.25	6116.97
1668.89	5079.16	7131.16	6342.34	7288.14	5970.98
1670.89	5199.96	7229.74	6135.29	7332.89	5849.4
1672.88	5304.63	7448.14	5918.34	7324.89	5764.13
1674.88	5386.37	7706.32	5712.44	7274.96	5734.14
1676.88	5423.23	7996.15	5537.91	7206.03	5738.81
1678.88	5411.46	8273.58	5414.25	7147.37	5761.41
1680.88	5355.45	8516.06	5373.25	7115.62	5797.32
1682.88	5281.16	8726.71	5418.8	7139.6	5841.88
1684.88	5216.55	8912.64	5534.2	7264.27	5889.83
1686.88	5199.77	9079.72	5709.49	7456.16	5928.74
1688.87	5259.72	9229.76	5936.52	7563.32	5953.82
1690.87	5458.83	9363.96	6211.93	7578.33	5979.58
1692.87	5828.95	9498.51	6538.02	7487.4	6014.98
1694.87	6288.49	9651.5	6920.21	7286.88	6046.88
1696.87	6757.54	9832.42	7328.95	6990.39	6081.94
1698.87	7246.11	10060.9	7711.19	6608.39	6134.92
1700.87	7747.17	10346.9	8035.1	6155.03	6212.13
1702.86	8225.78	10619.5	8285.36	5681.98	6308.34
1704.86	8607.44	10827.6	8446.08	5254	6396.72
1706.86	8887.67	10958.1	8508.18	4955.34	6469.95
1708.86	9066.72	10998.2	8471.42	4813.68	6507
1710.86	9150.93	10942.5	8337.74	4777.97	6500.51
1712.86	9148.16	10773.8	8117.1	4868.41	6472.44
1714.86	9079.45	10479	7813.84	5057.9	6403.38
1716.86	8938.49	10047.8	7458.58	5294.46	6311.26
1718.85	8766.46	9479.96	7098.64	5565.59	6200.97
1720.85	8589.12	8788.55	6788.67	5855.14	6053.07
1722.85	8462.38	8030.24	6569.78	6157.04	5849.28
1724.85	8478.52	7279.44	6470.12	6470.18	5592.39
1726.85	8440.35	6655.32	6451.43	6787.45	5284.83
1728.85	8352.84	6250.6	6424.43	7097.76	4955.39
1730.85	8178.78	6068.66	6373.7	7394.37	4626.8
1732.84	7964.99	6189.15	6291.97	7631.15	4326.69
1734.84	7652.78	6572.86	6156.84	7786.17	4041.98
1736.84	7287.6	6967.11	5958.19	7854.67	3793.24
1738.84	6884.8	7351.27	5678.02	7830.97	3608.15
1740.84	6456.46	7708.22	5304.86	7721.42	3516.53
1742.84	6050.05	8029.09	4841.9	7534.99	3536.08
1744.84	5731.32	8298.05	4320.97	7273.75	3609.14
1746.84	5587.1	8500.42	3799.26	6939.2	3722.38
1748.83	5549.21	8640.09	3377.78	6559.15	3868.26
1750.83	5646.5	8729.76	3159.57	6192.72	4056.6
1752.83	5774.9	8793.42	3254.49	5902.38	4296.13
1754.83	5936.33	8849.9	3621.58	5666.62	4589.36
1756.83	6112.06	8914.76	4037.34	5527.59	4913.94
1758.83	6268.79	8993.39	4450.02	5523.8	5220.19
1760.83	6362.75	9096.77	4840.31	5657.99	5461.45
1762.82	6381.79	9222.29	5199.58	5856.27	5652.26
1764.82	6331.91	9348.17	5526.05	6026.02	5808.75
1766.82	6218.98	9451.92	5825.3	6165.13	5950
1768.82	6055.04	9519.39	6100.78	6280.1	6097.11
1770.82	5848.68	9544.75	6361.4	6371.8	6261.26
1772.82	5641.33	9532.77	6613.56	6451.29	6459.66
1774.82	5489.82	9487.08	6844.62	6527.94	6675.08
1776.82	5414.52	9416.2	7033.14	6610.75	6906.25
1778.81	5373.12	9332.46	7157.51	6709.91	7133.96
1780.81	5324.91	9246.15	7201.33	6821.58	7329.92
1782.81	5283.87	9163.52	7149.79	6933.41	7457.4
1784.81	5280.29	9093.65	6988.62	7017.14	7509.83
1786.81	5332.73	9042.38	6705.99	7043.36	7482.79
1788.81	5450.59	8997.81	6299.46	7016.22	7373.17
1790.81	5604.61	8959.82	5761.25	6954.35	7194.76
1792.8	5749.49	8934.23	5098.5	6890.16	6952.73
1794.8	5879.43	8933.46	4346.61	6849.51	6668.34
1796.8	5985.86	8969.35	3569.45	6843.97	6361.81
1798.8	6074.86	9043.04	2844.62	6877.39	6069.9
1800.8	6161.13	9120.86	2244.16	6909.22	5870.56
1802.8	6268.47	9202.77	1881.36	6930.92	5787.05
1804.8	6402.15	9288.7	1629.14	6945.3	5794.8
1806.8	6534.23	9374.1	1479.09	6960.6	5902.46
1808.79	6667.13	9435.15	1414.56	6973.54	6058.39
1810.79	6810.88	9438.33	1466.59	6963.4	6227.35
1812.79	6949.39	9376.79	1649.45	6918.09	6382.11
1814.79	7038.13	9256	1957.19	6832.54	6492.86
1816.79	7044.77	9087.19	2383.92	6712.56	6550.59
1818.79	6964.5	8882.68	2822.63	6570.29	6555.81
1820.79	6797.69	8657.1	3258.05	6418.63	6519.95
1822.78	6542.95	8444.97	3677.59	6261.46	6466.91
1824.78	6209.48	8294.78	4074.59	6113.23	6408.85
1826.78	5815.11	8228.81	4448.95	5991.96	6371.49
1828.78	5420.83	8215.55	4789.67	5914.47	6387.26
1830.78	5099.09	8229.1	5079.79	5859.1	6469.25
1832.78	4957.78	8266.74	5311.49	5831.77	6599.09
1834.78	5053.48	8334.93	5478.88	5833.97	6768.49
1836.78	5188.53	8446.34	5584.09	5855.86	6956.15
1838.77	5357.29	8607.47	5621.56	5889.47	7103.31
1840.77	5576.64	8814.31	5599.96	5943.02	7178.45
1842.77	5850.81	9053.32	5515.73	6028.48	7176.57
1844.77	6149.36	9280.94	5397.94	6155.92	7098.67
1846.77	6457.56	9471.23	5269.29	6330.44	6950.31
1848.77	6763.69	9624.12	5143.01	6550.91	6748.21
1850.77	7052.49	9739.57	5011.4	6799.12	6507.04
1852.76	7295.72	9822.9	4803.55	7051.35	6258.32
1854.76	7466.9	9888.06	4513.91	7296.21	6053.27
1856.76	7560.79	9944.99	4160.53	7529.32	5926.88
1858.76	7584.98	9998.87	3759.28	7746.36	5864.1
1860.76	7557.97	10056.8	3352.3	7950.09	5818.19
1862.76	7492.64	10096.9	3009.34	8129.05	5746.91
1864.76	7389.47	10078.8	2799.35	8259.79	5657.19
1866.76	7261.32	10012.9	2808.03	8325.28	5559.69
1868.75	7096.12	9922.51	3122.57	8328.68	5447.17
1870.75	6898.63	9822.76	3652.8	8279.45	5309.47
1872.75	6710.79	9708.12	4224.95	8174.28	5168.65
1874.75	6572.17	9560.82	4776.05	8021.23	5029.08
1876.75	6470.25	9354	5277.59	7826.82	4915.88
1878.75	6398.31	9071.55	5725.56	7595.48	4831.8
1880.75	6372.57	8694.35	6116.32	7342.41	4797.63
1882.74	6392.13	8197.87	6448.07	7095.47	4829.17
1884.74	6438.5	7547.89	6719.13	6897.13	4943.95
1886.74	6490.37	6744.81	6937.81	6796.16	5118.03
1888.74	6560.95	5816.93	7111.54	6833.62	5299.25
1890.74	6658.19	4823.31	7232.85	6911.5	5482.66
1892.74	6778.69	3852.71	7302.98	7005.31	5661.04
1894.74	6921.1	3020.84	7327.66	7114.09	5823.08
1896.74	7070	2326.71	7305.52	7225.24	5973.71
1898.73	7173.85	1830.83	7239.48	7321.12	6111.88
1900.73	7226.96	1499.03	7108.33	7401.21	6233.71
1902.73	7236.41	1241.77	6932.02	7474.13	6344.98
1904.73	7209.66	1062.93	6741.26	7548.59	6445.42
1906.73	7170.43	982.425	6563.4	7648.01	6539.63
1908.73	7129.82	1015.81	6424.74	7787.42	6619.95
1910.73	7106.68	1184.65	6371.37	7982.18	6689.01
1912.72	7137.93	1512.32	6438.32	8249.3	6728.75
1914.72	7217.46	2014.17	6578.87	8572.48	6736.38
1916.72	7282.37	2697.7	6744.91	8951.48	6723.77
1918.72	7322.45	3528.97	6905.71	9377.29	6717.36
1920.72	7339.15	4362.67	7035.64	9751.2	6726.58
1922.72	7339.87	5163.28	7127.4	10034	6767.95
1924.72	7324.27	5922.12	7187.56	10191.7	6845.53
1926.72	7292.11	6623.98	7224.78	10184.2	6942.38
1928.71	7254.18	7265.28	7254.41	10015.5	7061.2
1930.71	7208.89	7843.97	7282.98	9668.12	7180.17
1932.71	7135.99	8356.11	7325.46	9129.59	7274.68
1934.71	7031.36	8800.69	7387.99	8412.71	7349.57
1936.71	6891.79	9177.53	7452.75	7512.08	7410.42
1938.71	6722.03	9494.08	7519.99	6478.12	7468.21
1940.71	6545.98	9745.85	7585.69	5423.63	7540.01
1942.7	6373.16	9931.36	7636.84	4484.11	7629.68
1944.7	6215.76	10058.4	7663.28	3851.98	7664.22
1946.7	6082.01	10140.6	7665.1	3620.86	7617.84
1948.7	5982.01	10203.9	7650.29	3216.06	7516.88
1950.7	5932.76	10266.2	7627.13	2968.47	7402.22
1952.7	5941.71	10359.1	7605.46	3042.54	7290.06
1954.7	6042.49	10524.5	7599.1	3103.91	7214.74
1956.7	6250	10775.1	7612.7	3492.77	7205.51
1958.69	6473.39	11053.9	7623.66	3985.25	7181.91
1960.69	6664.37	11324.3	7638.71	4535.8	7111.11
1962.69	6833.8	11551.7	7666.7	5105.49	6999.1
1964.69	7008.66	11702.3	7716.22	5639.29	6856.03
1966.69	7219.92	11768.1	7793.56	6125.31	6694.67
1968.69	7479.49	11757.4	7904.38	6554.46	6532.38
1970.69	7833.52	11677.9	8054.49	6915.93	6383.07
1972.68	8236.5	11536.6	8213.6	7198.78	6262.28
1974.68	8592.37	11342.2	8342.56	7406.04	6186.34
1976.68	8881.7	11108.7	8421.35	7544.94	6158.86
1978.68	9090.41	10880.3	8447.76	7622.86	6152.13
1980.68	9209.52	10713.5	8422.17	7655.54	6139.4
1982.68	9227.04	10596.5	8344.77	7652.11	6113.3
1984.68	9133.55	10490.1	8227.22	7620.93	6011.17
1986.68	8921.64	10362.6	8075.28	7567.58	5823.2
1988.67	8578.35	10214	7901.7	7500.26	5565.79
1990.67	8098.18	10038.8	7724.13	7424.66	5270.65
1992.67	7507.48	9835.94	7569.26	7347.93	4972.91
1994.67	6843.81	9610.15	7477.09	7278.8	4708.55
1996.67	6135.53	9364	7424.67	7223.81	4529.45
1998.67	5397.98	9107.78	7372.57	7167.66	4541.92
2000.67	4673.98	8841.54	7321.38	7107.99	4847.11
2002.66	4017.89	8582.69	7280.32	7043.51	5150.65
2004.66	3520.65	8337.03	7251.78	6974.66	5449.15
2006.66	3252.85	8080.61	7242.16	6901.97	5734.88
2008.66	3290.59	7816.18	7251.16	6798.09	5991.36
2010.66	3551.02	7556.58	7279.61	6667.98	6218.55
2012.66	3879.19	7324.11	7325.53	6531.75	6411.01
2014.66	4259.7	7121.64	7380.93	6411.96	6557.51
2016.66	4679.3	6939.02	7429.84	6327.26	6659.13
2018.65	5116.01	6783.01	7479.42	6298.29	6716.34
2020.65	5553.79	6654.03	7541.9	6358.22	6733.21
2022.65	5979.4	6560.31	7618.61	6520.08	6721.94
2024.65	6380.57	6507.33	7704.81	6698.2	6682.25
2026.65	6728.24	6473.19	7812.71	6878.62	6615.6
2028.65	7016.09	6480.1	7959.42	7055.24	6518.72
2030.65	7244.83	6560.63	8151.02	7219.14	6413.6
2032.64	7414.49	6730.24	8392.4	7368.34	6314.84
2034.64	7531.92	7012.72	8644.58	7482.37	6235.31
2036.64	7613.49	7408.02	8814.33	7559.43	6174.25
2038.64	7675.57	7769.31	8878.16	7597.41	6121.85
2040.64	7733.02	8099.46	8835.97	7600.73	6065.89
2042.64	7814.73	8389.35	8692.37	7576.17	6016.93
2044.64	7955.19	8639.08	8462.51	7529.07	5984.19
2046.64	8187.97	8853.84	8170.51	7469.71	5974.08
2048.63	8510.67	9013.19	7839.86	7418.33	5992.64
2050.63	8780.04	9104.81	7487.22	7393.41	6042.02
2052.63	8970.43	9132.44	7155.52	7369.41	6107.85
2054.63	9080.03	9115	6928.42	7316.28	6171.96
2056.63	9105.73	9062.3	6884.44	7251.14	6234.65
2058.63	9048.59	8983.15	7063.84	7189.49	6283.77
2060.63	8918.28	8901.95	7321.72	7144.08	6327.23
2062.62	8738.95	8820.36	7559.52	7127.42	6366.95
2064.62	8517.92	8722.18	7768.07	7127.58	6411.84
2066.62	8293.64	8616.3	7932.1	7137.35	6466.17
2068.62	8093.01	8520.86	8036.75	7159.26	6526.17
2070.62	7978.08	8454.55	8079.04	7187.99	6594.23
2072.62	7963.9	8426.11	8065.93	7228.15	6671.82
2074.62	8041.45	8426.83	8004.4	7290.28	6766.14
2076.62	8157.92	8402.62	7905.3	7376.19	6882.94
2078.61	8294.38	8352.32	7764.99	7487.01	7033.17
2080.61	8447.65	8269.36	7588.86	7607.49	7217.23
2082.61	8617.18	8157.27	7393.25	7712.48	7420.29
2084.61	8811.83	8016.32	7168.5	7784.36	7559.75
2086.61	9048.89	7849.92	6899.16	7819.79	7623.82
2088.61	9330.27	7671.67	6562.44	7824.82	7609.45
2090.61	9606.95	7495.31	6159.06	7806.21	7521.28
2092.6	9816.5	7345.64	5696.13	7776.77	7377.3
2094.6	9951.19	7262.37	5177.49	7749.89	7190.68
2096.6	10007	7290.05	4626.19	7730.94	6976.27
2098.6	9980.62	7440.12	4081.11	7707.25	6761.61
2100.6	9877.56	7690.63	3558.49	7668.85	6570.96
2102.6	9697.14	7967.59	3019.53	7631.09	6436.23
2104.6	9426.4	8208.79	2472.29	7606.78	6337.62
2106.6	9063.1	8384.78	1952.81	7604.95	6239.33
2108.59	8623	8481.94	1521.34	7640.19	6142.83
2110.59	8120.89	8494.13	1242.95	7692.59	6038.84
2112.59	7518.99	8422.98	1033.77	7751.75	5922.36
2114.59	6806.57	8276.16	856.559	7809.76	5788.75
2116.59	5995.78	8065.19	704.401	7860.12	5640.87
2118.59	5121.38	7809.25	579.4	7888.2	5492.8
2120.59	4248.37	7558.05	480.136	7884.27	5372.78
2122.58	3442.68	7369.78	399.18	7853.12	5294.82
2124.58	2760.97	7293.51	333.272	7800.35	5276.09
2126.58	2244.67	7374.52	280.921	7733.53	5303.14
2128.58	1885.93	7475.57	238.281	7659.69	5348.63
2130.58	1680.32	7549.15	204.149	7581.65	5429.13
2132.58	1576.74	7570.82	176.477	7509.99	5536.74
2134.58	1554.05	7539.41	153.871	7460.78	5655.44
2136.58	1599.01	7462.35	135.638	7439.56	5771.49
2138.57	1721.35	7358.64	121.226	7404.82	5876.64
2140.57	1921.27	7247.2	109.099	7348.48	5971.18
2142.57	2190.48	7155.18	104.528	7250.91	6050.41
2144.57	2522.77	7132.83	115.344	7105.85	6118.64
2146.57	2899.52	7235.36	151.962	6893.73	6183.95
2148.57	3307.48	7514.28	229.072	6602.71	6225.14
2150.57	3742.56	7918.39	367.806	6233.31	6248.05
2152.56	4188.95	8287.57	591.763	5809.58	6259.68
2154.56	4631.79	8616.28	928.474	5366.91	6269.58
2156.56	5062.37	8900.63	1401.96	4962.98	6289.69
2158.56	5473.19	9132.02	2030.81	4687.99	6336.6
2160.56	5858.93	9300.74	2821.65	4637.08	6385.5
2162.56	6214.58	9393.49	3684.73	4877.52	6426.62
2164.56	6524.36	9383.93	4525.68	5142.88	6461.43
2166.56	6770.27	9243.91	5323.75	5439	6492.17
2168.55	6953.86	8934.47	6063.05	5745.02	6508.29
2170.55	7080.4	8450.74	6736.97	6027.99	6508.09
2172.55	7159.39	7799.05	7335.42	6273.39	6493.8
2174.55	7212.24	6979.43	7845.75	6470.24	6457.56
2176.55	7249.62	6038.68	8265.7	6620.18	6412.48
2178.55	7304.54	5069.78	8593.45	6723.41	6373.41
2180.55	7413.09	4217.36	8834.35	6788	6348.8
2182.54	7598.22	3731.55	8998.87	6826.77	6345.45
2184.54	7838.4	3695.1	9098.4	6843.59	6374.39
2186.54	8079.16	3885.31	9149.26	6850.74	6402.39
2188.54	8304	4169.94	9165.06	6851.1	6421.17
2190.54	8508.83	4500.73	9169.45	6821.48	6436.75
2192.54	8671.47	4870.38	9181.02	6730.61	6454.91
2194.54	8777.52	5270.97	9198.65	6561.62	6470.74
2196.54	8827.06	5702.4	9198.22	6307.92	6489.69
2198.53	8827.01	6159.34	9185.94	5962.97	6502.78
2200.53	8783.65	6627.43	9145.24	5528.98	6497.13
2202.53	8702.19	7076.43	9047.53	5023.88	6487.59
2204.53	8582.73	7483.88	8907.25	4468.73	6483.62
2206.53	8439.05	7826.08	8747.87	3901.35	6503.29
2208.53	8263.34	8096.81	8581.33	3328.14	6561.82
2210.53	8013.22	8295.2	8432.32	2806.11	6651.34
2212.52	7669.4	8422.53	8338.67	2403.91	6762.61
2214.52	7233.24	8486.32	8329.11	2195.32	6899.22
2216.52	6716.24	8496.77	8369.9	2198.94	7054.71
2218.52	6161.92	8465.86	8444.59	2405.16	7238.75
2220.52	5623.62	8397.43	8490.24	2748	7449.48
2222.52	5148.84	8286.45	8485.03	3147.54	7613.12
2224.52	4761.03	8124.14	8426.17	3572.2	7706.87
2226.52	4500.04	7928.15	8311.74	4006.89	7724.89
2228.51	4359.83	7718.93	8148.41	4450.72	7668.66
2230.51	4315.75	7525.35	7936.68	4901.39	7554.9
2232.51	4252.86	7399.75	7690.48	5352.98	7399.73
2234.51	4147.52	7398.19	7434.77	5796.45	7222.2
2236.51	3987.13	7564.06	7208.71	6222.79	7060.24
2238.51	3767.51	7761.83	7042.58	6623.09	6963.74
2240.51	3496.46	7943.07	6964.27	6996.61	6920.16
2242.5	3178.42	8093.43	6965.67	7342.3	6875.54
2244.5	2820.09	8214.38	6996.98	7666.19	6809.36
2246.5	2461.12	8307.19	7019.21	7973.47	6711.8
2248.5	2140.2	8375.5	7042.05	8261.6	6585.58
2250.5	1887.87	8400.63	7079.61	8523.04	6441.83
2252.5	1732.66	8369.31	7139.58	8731.65	6290.38
2254.5	1689	8296.33	7223.47	8862.25	6149.45
2256.5	1746.3	8201.48	7326.8	8912.23	6047.17
2258.49	1859.28	8093.41	7423.27	8879.42	6010.23
2260.49	2039.24	7990.84	7487.6	8768.51	6056.64
2262.49	2297.67	7921.77	7501.1	8586.22	6176.08
2264.49	2634.18	7888.56	7469.89	8351.78	6352.78
2266.49	3017.62	7866.28	7411.02	8093.24	6589.19
2268.49	3369.92	7817.08	7345.82	7848.64	6887.1
2270.49	3673.34	7740.84	7286.02	7665.54	7213.26
2272.49	3925.01	7636.78	7243.16	7556.73	7534.6
2274.48	4123.89	7508.3	7221.58	7459.96	7811.56
2276.48	4270.11	7359.43	7197.3	7368.9	8008.44
2278.48	4380.11	7201.46	7165.61	7283.52	8110.09
2280.48	4471.67	7048.54	7129.9	7194.3	8103.64
2282.48	4550.55	6896.7	7066.33	7099.33	7978.82
2284.48	4624.58	6749.28	6969.01	7003.32	7739.29
2286.48	4653.29	6629.8	6854.14	6913.8	7393.21
2288.47	4637.59	6549.41	6728.8	6838.06	6958.76
2290.47	4590.89	6517.25	6597.09	6789.91	6479.38
2292.47	4525.6	6546.44	6480.96	6779.18	6032.5
2294.47	4454.29	6655.42	6403.89	6784.18	5719.26
2296.47	4394.31	6823.62	6396.52	6776.2	5616.67
2298.47	4375.24	6983.25	6464.9	6753.34	5492.25
2300.47	4431.29	7128.08	6534.45	6722.97	5369.33
2302.47	4565.08	7259.03	6600.2	6689.72	5313.22
2304.46	4737.13	7350.68	6668.94	6664.75	5321.65
2306.46	4949.01	7409.82	6745.11	6658.39	5380.22
2308.46	5196.76	7452.91	6829.73	6669.99	5480.07
2310.46	5416.72	7496.36	6920.73	6689.44	5615.65
2312.46	5600.17	7533.27	6994.03	6712.24	5768.48
2314.46	5746.24	7569.54	7039.64	6746.72	5933.68
2316.46	5839.84	7592.67	7060.47	6774.28	6093.31
2318.45	5862.03	7597.89	7065.14	6794.05	6234.56
2320.45	5801.44	7593.58	7058.96	6807.55	6336.42
2322.45	5625.94	7577.78	7047.58	6809	6394.97
2324.45	5333.54	7555.63	7042.94	6803.75	6427.37
2326.45	4929.15	7521.85	7060.12	6790.5	6462.53
2328.45	4419.13	7456.42	7110.98	6762.96	6503.18
2330.45	3833.21	7339.79	7186.49	6722.48	6539.24
2332.45	3201.83	7187.7	7281.36	6669.79	6562.21
2334.44	2602.63	7009.59	7385.25	6611.45	6558.84
2336.44	2042.14	6816.41	7486.9	6556.06	6537.24
2338.44	1587.83	6627.33	7569.72	6507.63	6492.54
2340.44	1329.63	6489.16	7628.57	6471.09	6428.7
2342.44	1143.73	6418.18	7664.23	6452.61	6348.41
2344.44	1049.66	6365.17	7683.06	6462.37	6269.84
2346.44	1055.79	6327.16	7700.46	6501.34	6201.01
2348.43	1171.49	6288.03	7725.73	6536.89	6162.45
2350.43	1405.9	6247.84	7760.11	6553.45	6153.7
2352.43	1764.99	6199.32	7807.6	6550.79	6184.23
2354.43	2239.34	6144.4	7862.24	6526.1	6266.1
2356.43	2746.72	6084.22	7924.55	6476.45	6403.77
2358.43	3261.35	6014.93	7999.37	6403.9	6563.72
2360.43	3750.06	5929.54	8084.38	6312.55	6718.09
2362.43	4199.18	5825.5	8173.5	6206.73	6849.64
2364.42	4582.3	5703.42	8262.54	6092.73	6957.7
2366.42	4902.2	5561.15	8350.8	5982.5	7024.04
2368.42	5159.83	5411.38	8440.01	5893.18	7050.66
2370.42	5357.36	5263.32	8531.32	5845.44	7031.39
2372.42	5504.34	5132.88	8616.7	5855.04	6972.56
2374.42	5617	5045.2	8692.93	5910.44	6891
2376.42	5715.67	5042.26	8753.07	6016.44	6788.01
2378.41	5824.59	5172.89	8778.35	6147.13	6683.17
2380.41	5951.7	5488.91	8758.5	6282.79	6587.7
2382.41	6106.13	5909.73	8699.72	6425.2	6517.12
2384.41	6270.41	6354.89	8598.16	6567.76	6476.38
2386.41	6427.69	6799.31	8457.2	6710.19	6440.92
2388.41	6573.13	7212.33	8271.28	6841.66	6402.08
2390.41	6707.83	7579.7	8025.57	6953.72	6357.51
2392.41	6834.31	7884.89	7713.82	7026.67	6303.75
2394.4	6953.71	8112.24	7352.58	7062.66	6238.25
2396.4	7064.34	8251.3	6966.6	7069.89	6165.32
2398.4	7150.83	8301.9	6606.13	7059.45	6087.65
2400.4	7212.37	8280.62	6337	7039.1	6003.63
2402.4	7250.11	8200.88	6091.14	7026.28	5911.13
2404.4	7269.28	8072.29	5829.4	7032.49	5820.99
2406.4	7267.5	7898.2	5524.08	7042.35	5738.37
2408.39	7250.41	7710.95	5175.19	7025.3	5677.52
2410.39	7216.06	7543.1	4784.75	6976.68	5649.06
2412.39	7146.3	7392.5	4354.29	6902.67	5665.49
2414.39	7033.2	7277.12	3905.83	6808.98	5743.23
2416.39	6873.67	7207.08	3486	6701.08	5886.88
2418.39	6659.48	7195.14	3161.4	6583.56	6067.64
2420.39	6390.11	7258.79	3004	6466.21	6244.97
2422.39	6061.56	7406.1	3064.88	6359.1	6390.71
2424.38	5684.92	7644.23	3237.7	6255.51	6493.29
2426.38	5277.66	7956.12	3555.19	6135.47	6543.54
2428.38	4853.87	8247.82	3983.41	5981.68	6544.58
2430.38	4442.21	8456.46	4410.77	5787.09	6500.39
2432.38	4067.3	8568.68	4824.73	5538.24	6414.02
2434.38	3689.32	8574.39	5218.6	5217.95	6301.7
2436.38	3349.57	8466.84	5582.02	4806.74	6163.22
2438.37	3083.06	8244.91	5904.46	4305.36	6010.28
2440.37	2910.69	7938.83	6163.16	3721.51	5858.16
2442.37	2836.21	7560.54	6349.05	3081.42	5737.5
2444.37	2875.39	7134.4	6462.45	2437.47	5643.05
2446.37	2973.99	6723.3	6510.35	1861.6	5579.77
2448.37	3144.82	6412.75	6519.13	1454.59	5559.3
2450.37	3410.06	6163.64	6508.22	1201	5594.33
2452.37	3774.52	5950.56	6493.13	984.203	5681.66
2454.36	4232.04	5784.18	6481.36	815.559	5810.97
2456.36	4766.09	5682.67	6487.03	693.149	5968.1
2458.36	5288.57	5654.87	6501.29	626.87	6127.35
2460.36	5742.91	5681.23	6518.72	623.919	6277.9
2462.36	6125.6	5762.46	6545.7	700.412	6421.06
2464.36	6431.8	5886.36	6600.81	871.824	6562.31
2466.36	6663.48	6042.32	6688.57	1150.91	6690.44
2468.35	6829.12	6206.94	6776.27	1549.56	6798.42
2470.35	6944.72	6338.47	6820.93	2070.31	6878.85
2472.35	7034.93	6416.87	6816.94	2654.1	6919.59
2474.35	7114.36	6445.64	6756.34	3221.62	6918.05
2476.35	7188.66	6444.65	6632.47	3762.85	6874.15
2478.35	7276.53	6437.32	6431.29	4268.26	6791.04
2480.35	7321.51	6440.82	6139.18	4733.51	6675.03
2482.35	7275.7	6458.67	5755.47	5151.95	6529.28
2484.34	7144.97	6471.5	5279.67	5518.29	6360.29
2486.34	6916.8	6475.59	4726.41	5831.8	6167.57
2488.34	6605.28	6469.76	4117.53	6089.72	5945.19
2490.34	6213.23	6451.01	3494.24	6293.28	5700.64
2492.34	5770.03	6415.06	2907.15	6453.19	5444.34
2494.34	5337.44	6366.98	2413.67	6577.23	5182.77
2496.34	4987.34	6308.7	2059.33	6676.69	4949.52
2498.33	4790.68	6241.4	1873.94	6765.47	4767.82
2500.33	4856.69	6175.41	1891.09	6852	4668.38
2502.33	5226.57	6133.44	2064.43	6945.4	4677.07
2504.33	5515.2	6154.88	2384.93	7054.94	4816.96
2506.33	5824.37	6287.91	2851.16	7156.72	5032.81
2508.33	6034.93	6586.65	3372.37	7217.49	5249.85
2510.33	6218.32	6947.35	3872.32	7233.76	5456.74
2512.33	6343.49	7300.33	4347.05	7207.78	5654.49
2514.32	6393.6	7632	4790.5	7155.61	5839.39
2516.32	6391.56	7939.11	5206.98	7088.09	6016.01
2518.32	6337.13	8223.28	5594.12	7021.38	6184.14
2520.32	6255.95	8491.5	5935.91	6980.69	6343.4
2522.32	6162.11	8722.69	6233.02	6990.83	6503.32
2524.32	6061.32	8855.07	6490.04	7070.03	6660.15
2526.32	5991.94	8875.93	6695.15	7192.38	6825.66
2528.31	5977.66	8780.17	6841.47	7339.97	6989.95
2530.31	5982.21	8572.77	6935.73	7516.9	7138.8
2532.31	5983.21	8264.3	6991.26	7719.41	7263.58
2534.31	5977.43	7857.6	7026.01	7922.02	7351.26
2536.31	5971.83	7380.1	7052.41	8105.3	7389.39
2538.31	5974.28	6882.8	7080.43	8247.85	7365.83
2540.31	5993.33	6374.63	7117.6	8334.37	7269.33
2542.31	6027.38	5949.84	7164.08	8354.03	7106.95
2544.3	6066.1	5719.86	7216.34	8302.51	6883.47
2546.3	6070.55	5723.02	7273.08	8186.33	6601.74
2548.3	6034.48	5809.65	7331.77	8010.71	6277.42
2550.3	5964.21	5934.54	7389.25	7782.88	5937.07
2552.3	5864.63	6055.8	7445.66	7517.34	5609.88
2554.3	5734.93	6149.11	7494.44	7248.9	5315.97
2556.3	5579.89	6207.77	7524.29	7021.64	5068.12
2558.29	5401.15	6225.29	7520.85	6881.81	4867.37
2560.29	5189.98	6207.49	7483.48	6828.1	4725.74
2562.29	4946.73	6172.11	7418.09	6811.02	4657.27
2564.29	4673.99	6134.89	7330.42	6799.14	4679.05
2566.29	4378.05	6104.08	7227.36	6786.07	4777.62
2568.29	4075.03	6094.45	7120.73	6772.62	4930.7
2570.29	3794.84	6134.07	7017.42	6765.3	5077.9
2572.29	3561.15	6197.7	6922.95	6769.11	5205
2574.28	3390.44	6264.47	6814.19	6784.45	5308.6
2576.28	3275.75	6347.84	6679.93	6810.94	5389.45
2578.28	3216.97	6452.31	6517.58	6846.35	5449.7
2580.28	3215.12	6582.07	6322.88	6879.78	5491.56
2582.28	3269.33	6737.01	6092.51	6905.46	5521.12
2584.28	3358.26	6917.89	5831.97	6931.54	5535.24
2586.28	3450.13	7113.23	5554.9	6965.65	5523.87
2588.27	3542.74	7304.87	5295.32	7017.49	5486.29
2590.27	3646.23	7475.76	5104.45	7072.77	5419.97
2592.27	3768.07	7616.63	5027.04	7119.72	5328.73
2594.27	3916.64	7725.8	5117.6	7159.07	5226.48
2596.27	4102.14	7808.03	5335.62	7192.61	5126.04
2598.27	4325.04	7871.18	5645.47	7232.53	5021.38
2600.27	4584.45	7914.95	6016.99	7287.95	4918.22
2602.27	4857.26	7946.71	6374.07	7369.66	4821.28
2604.26	5113.44	7968.79	6706.34	7453.33	4747.56
2606.26	5358.54	7995.49	7008.28	7549.14	4719.49
2608.26	5590.07	8025.89	7274.73	7667.93	4759.84
2610.26	5804.84	8054.72	7514.5	7820.46	4892.75
2612.26	5994.85	8075.22	7722.56	8000.03	5118.01
2614.26	6140.43	8092.9	7895.84	8153.41	5379.86
2616.26	6227.15	8102.54	8043.63	8236.87	5665.15
2618.25	6247.28	8100.46	8179.77	8249.17	5953.03
2620.25	6200.52	8086.52	8315.56	8183.17	6226.67
2622.25	6088.61	8066.02	8454.52	8033.69	6467.35
2624.25	5910.74	8048.52	8599.97	7806.38	6668.59
2626.25	5673.56	8038.86	8739.81	7509.3	6828.02
2628.25	5399.51	8030.58	8864.44	7172.29	6956.16
2630.25	5105.86	8023.32	8950.3	6837.58	7070.73
2632.25	4824.76	8012.76	8975.87	6540.11	7189.14
2634.24	4579.43	7996.53	8943.35	6308.68	7324.03
2636.24	4429.23	7952.76	8854.81	6106.51	7490.25
2638.24	4421.17	7877.62	8720.6	5952.03	7687.91
2640.24	4609.14	7764.3	8545.57	5871.18	7901.19
2642.24	4906.83	7615.17	8340.88	5899.1	8115.74
2644.24	5198.78	7443.18	8120.32	6068.12	8320.58
2646.24	5470.08	7265.79	7894.4	6261.37	8505.59
2648.23	5715.44	7115.83	7643.45	6438.26	8671.08
2650.23	5928.83	7045.13	7353.59	6596.36	8809.66
2652.23	6097.74	7099.36	6997.68	6734.67	8919.87
2654.23	6210.16	7252.77	6554.36	6852.6	8996.1
2656.23	6268.14	7409.99	6021.37	6957.88	9027.5
2658.23	6282.97	7563.59	5409.9	7059.12	9003.83
2660.23	6280.94	7704.1	4768.14	7148.87	8935.7
2662.23	6271.32	7808.34	4175.94	7227.81	8832.63
2664.22	6281.83	7853.92	3738.99	7301.74	8704.81
2666.22	6346.16	7845	3594.37	7381.07	8574.82
2668.22	6485.47	7787.29	3836.77	7476.69	8463.54
2670.22	6655.44	7686.72	4190.92	7599.5	8392.35
2672.22	6813.46	7543.66	4634.41	7750.06	8342.59
2674.22	6942.61	7369.87	5104.3	7910.68	8298.84
2676.22	7024.34	7175.38	5589.09	8073.02	8247.03
2678.21	7058.84	6982.17	6078.4	8217.07	8182.81
2680.21	7049.07	6744.69	6565.91	8327.83	8107.05
2682.21	7006.01	6454.03	7038.69	8402.76	8023.05
2684.21	6944.86	6114.38	7477.86	8446.94	7936.2
2686.21	6876.08	5734.34	7876.39	8454.73	7857.52
2688.21	6813.03	5329.79	8218.86	8438.1	7798.19
2690.21	6781.19	4935.82	8492.8	8416.84	7776.13
2692.21	6803.53	4608.63	8704.57	8403.97	7812.14
2694.2	6850.28	4431.13	8862.92	8399.01	7921.5
2696.2	6927.13	4476.63	8982.35	8401.71	8042.07
2698.2	7025.19	4776.12	9079.1	8388.04	8151.91
2700.2	7137.54	5243.54	9162.59	8323.41	8241.39
2702.2	7255.66	5700.49	9244.95	8195.15	8303.43
2704.2	7343.54	6118.28	9337.63	8010.38	8337.05
2706.2	7364.78	6491.35	9420.39	7796.05	8332.52
2708.19	7302.07	6808.36	9472.48	7569.41	8281.81
2710.19	7150.19	7060.49	9489.58	7341.45	8165.83
2712.19	6910.75	7245.88	9474.21	7129.78	7950.99
2714.19	6589.67	7368.64	9435.95	6959.71	7608.98
2716.19	6188.61	7413.55	9381.67	6843.14	7130.15
2718.19	5734.92	7395.15	9318.2	6714.99	6511.88
2720.19	5279	7337.96	9250.65	6521.71	5774.03
2722.19	4884.34	7248.83	9177.1	6244.09	4969.05
2724.18	4617.5	7147.63	9102.59	5875.79	4185.35
2726.18	4537.09	7064.61	9035.73	5414.06	3552.15
2728.18	4575.26	7004.3	8994.83	4855.05	3234.28
2730.18	4640.99	6952.78	8990.35	4227.01	3335.71
2732.18	4721.14	6908.52	9036.08	3569.56	3664.32
2734.18	4814.03	6878.9	9129.42	2913.53	4174.09
2736.18	4924.38	6876.85	9255.08	2290.25	4712.45
2738.17	5042.45	6915.51	9391.33	1769.78	5244.63
2740.17	5162.34	7012.27	9513.74	1425.96	5772.91
2742.17	5283.62	7178.01	9600.81	1165.3	6273.58
2744.17	5413.9	7346.85	9645.78	955.13	6736.07
2746.17	5553.33	7477.46	9644.98	793.248	7152.91
2748.17	5697.49	7566.64	9599.82	673.723	7512.7
2750.17	5829.1	7617.96	9517.22	603.597	7812.56
2752.17	5945.9	7637.55	9411.38	586.297	8043.24
2754.16	6049.06	7634.86	9300.86	628.541	8205.5
2756.16	6141.73	7615.67	9214.44	739.166	8307.11
2758.16	6227.32	7588.47	9186.34	921.333	8365.09
2760.16	6309.23	7567.01	9238.7	1176.95	8393.93
2762.16	6382.36	7570.68	9335.61	1497.53	8407.23
2764.16	6449.11	7592.51	9449.43	1795.61	8411.57
2766.16	6512.71	7626.86	9533.58	2079.2	8390.69
2768.15	6566.51	7678.09	9566.69	2350.86	8351.04
2770.15	6621.65	7743.06	9548.34	2592.02	8301
2772.15	6686.62	7813.54	9467.67	2783.09	8249.26
2774.15	6764.45	7838.06	9336.55	2906.19	8218.43
2776.15	6856.19	7795.41	9175.31	2940.46	8224.48
2778.15	6942.24	7674.1	8987.62	2875.15	8267.96
2780.15	7019.97	7465.45	8787.2	2707.75	8328.43
2782.15	7062.97	7174.85	8599.92	2448.69	8410.04
2784.14	7062.63	6806.29	8417.68	2119.53	8512.68
2786.14	7019.99	6386.29	8232.52	1748.44	8645.41
2788.14	6938.99	5963.17	8040.44	1396.99	8809.06
2790.14	6821.66	5625.51	7822.86	1150.49	8969.61
2792.14	6675.49	5467.85	7545.25	1032.78	9099.68
2794.14	6518.36	5556.98	7189.92	1031.75	9179.24
2796.14	6373.98	5668.25	6757.53	1121.4	9206.53
2798.13	6264.84	5789.3	6243.92	1303.84	9185.29
2800.13	6208.22	5908.96	5661.24	1586.3	9123.87
2802.13	6167.54	6030.76	5023.83	1948.39	9028.65
2804.13	6115.68	6152.78	4341.56	2337.06	8911.34
2806.13	6057.88	6265.88	3653	2769.3	8792.66
2808.13	6008.16	6365.93	3016.53	3256.99	8687.57
2810.13	5981.06	6441.95	2500.37	3809.57	8605.09
2812.13	5984.95	6490.15	2165.75	4428.01	8547.03
2814.12	6033.31	6497.08	1977.96	5117.21	8508.15
2816.12	6117.96	6463.97	1775.16	5857.04	8498.87
2818.12	6202.65	6403.32	1563.78	6592.54	8501.2
2820.12	6254.31	6316.07	1372.45	7247.74	8503.14
2822.12	6261.9	6204.29	1247.72	7804.66	8503.33
2824.12	6230.34	6075.96	1240.24	8263.55	8505.35
2826.12	6161.52	5933.9	1371.16	8622.39	8516.23
2828.11	6070.89	5774.86	1668.38	8881.07	8530.6
2830.11	5977.15	5592.03	2104.96	9045.82	8559.75
2832.11	5880.04	5367.63	2687.22	9132.51	8606.76
2834.11	5792.45	5084.81	3346.01	9160.66	8669.09
2836.11	5726.14	4734.33	3979.21	9143.27	8717.81
2838.11	5690.06	4328.62	4574.36	9104.55	8733.18
2840.11	5691.7	3906.28	5129.94	9074.93	8720.65
2842.11	5735.88	3507.07	5660.78	9060.61	8672.54
2844.1	5843.07	3195.12	6190.65	8995.98	8582.91
2846.1	6014.24	3019.83	6740.95	8891.98	8453
2848.1	6238.83	3004.44	7332.7	8764.35	8281.92
2850.1	6448	3134.58	7983.89	8634.22	8086.12
2852.1	6605.77	3324.37	8694.14	8521.21	7879.78
2854.1	6691.42	3564	9442.9	8464.04	7669.47
2856.1	6694.04	3850.45	10215.8	8480.34	7480.44
2858.09	6603.22	4193.88	10946.6	8575.71	7332.54
2860.09	6415.1	4590.38	11609	8755.26	7241.39
2862.09	6129.4	5030.02	12204.2	8948.19	7194.87
2864.09	5749.29	5494.13	12736.8	9094.24	7195.99
2866.09	5297.08	5979.53	13185.7	9182.08	7241.27
2868.09	4807.4	6478.82	13519.1	9218.31	7336.61
2870.09	4323.62	6981.77	13722.2	9198.08	7474.76
2872.09	3873.54	7464.64	13775.2	9125.15	7629.35
2874.08	3477.29	7878.8	13670.8	9016.63	7768.48
2876.08	3181.4	8201.34	13409.6	8879.78	7880.54
2878.08	3033.29	8419.8	12989.9	8730.08	7968.28
2880.08	3057.52	8534.62	12432.6	8605.26	8042.44
2882.08	3215.89	8560.43	11783.4	8547.96	8116.12
2884.08	3406.86	8521.05	11123.2	8537.16	8212.88
2886.08	3630.11	8443.35	10551.9	8521.79	8342.75
2888.07	3887.8	8336.49	10246.3	8514.17	8519.12
2890.07	4179.27	8233.05	10058.2	8499.9	8735.32
2892.07	4497.2	8171.87	9910.72	8463.6	8954.06
2894.07	4829.93	8147.6	9778.81	8399.59	9169.74
2896.07	5164.64	8151.31	9691.18	8317.04	9378.38
2898.07	5488.94	8168.13	9618.3	8233.7	9579.53
2900.07	5804.86	8188.21	9559.46	8167.94	9766.99
2902.07	6113.11	8186.76	9515.28	8124.02	9927.26
2904.06	6404.74	8160.66	9476.9	8099.59	10053.9
2906.06	6670.85	8112.94	9438.37	8097.23	10143.6
2908.06	6900.97	8048.85	9394.81	8108.23	10197.2
2910.06	7097.15	7972.09	9345.83	8132.36	10226.7
2912.06	7255.7	7897.22	9305.62	8155.62	10251.7
2914.06	7388.88	7845.18	9277.48	8182.25	10288.7
2916.06	7510.4	7812.85	9261.28	8219.54	10358.5
2918.05	7621.09	7762.32	9264.1	8271.98	10477.9
2920.05	7696.16	7694.08	9277.69	8343.61	10666.7
2922.05	7727.66	7625.26	9265.61	8414.63	10894.4
2924.05	7725.87	7560.82	9218.03	8454.81	11100.9
2926.05	7698.1	7512.87	9113.11	8463.66	11271.9
2928.05	7643.61	7495.88	8919.07	8450.7	11399.1
2930.05	7563.89	7507.32	8639.93	8420.16	11477
2932.05	7458.68	7549.26	8271.23	8380.58	11503
2934.04	7331.3	7592.13	7830.22	8344.37	11483.3
2936.04	7180.47	7621.43	7361.31	8325.79	11427.5
2938.04	7000.59	7622.05	6835.97	8332.78	11336.5
2940.04	6793.87	7599.18	6298.14	8357.58	11217.9
2942.04	6560.61	7552.04	5827.99	8395.28	11083.7
2944.04	6305.68	7491.15	5522.33	8442.14	10898.7
2946.04	6040.57	7412.08	5467.84	8494	10652.8
2948.03	5789.19	7318.65	5718.92	8534.69	10341.6
2950.03	5573.52	7214.24	6035.91	8539.46	9968.72
2952.03	5389.77	7094.54	6406.1	8504.7	9543.6
2954.03	5237.96	6934.3	6794.64	8417.11	9083.31
2956.03	5121.16	6728.77	7196.88	8280.94	8597.52
2958.03	5039.98	6481.59	7618.16	8098.34	8075.24
2960.03	4975.6	6211.89	8049.3	7874.19	7471.68
2962.03	4910.64	5951.7	8476.61	7621.83	6789.39
2964.02	4834.05	5748.28	8884.3	7367.29	6027.89
2966.02	4734.86	5640.71	9256.96	7140.13	5203.59
2968.02	4614.56	5621.02	9563.18	6962.95	4355.28
2970.02	4473.2	5586.81	9794.18	6818.11	3533.17
2972.02	4316.27	5507.46	9947.16	6702.84	2795.81
2974.02	4155.12	5378.1	10027.8	6629.71	2189.91
2976.02	3998.93	5196.31	10049.8	6603.61	1753.92
2978.01	3866.46	4986.17	10034.5	6604.21	1446.46
2980.01	3776.25	4772.97	9996.32	6609.17	1192.31
2982.01	3740.17	4585.72	9946.49	6620.35	994.384
2984.01	3790.58	4451.16	9911.26	6641.28	843.226
2986.01	3965.83	4420.56	9897.26	6666.01	737.171
2988.01	4223.45	4556.57	9851.34	6670.18	667.215
2990.01	4468.31	4773.83	9769.44	6633.13	629.678
2992.01	4705.66	5066.54	9662.36	6545.01	618.28
2994	4936.18	5463.95	9537.64	6418.8	614.176
2996	5160.95	5946.04	9414.84	6278.81	576.688
2998	5382.26	6446.41	9302.47	6127.61	524.42
3000	5607.61	6948.33	9221.21	5985.32	453.188
3002	5837.62	7428.96	9194.24	5867.65	362.961
3004	6068.75	7867.11	9181.77	5711.49	272.823
3006	6294.56	8241.56	9163.56	5514.5	214.772
3007.99	6516.1	8538.95	9129.91	5276.13	185.885
3009.99	6736.39	8758.75	9083.9	5004.86	158.733
3011.99	6955.23	8911.41	9032.99	4715.17	121.003
3013.99	7163.08	9010.14	8982.54	4440.93	97.2022
3015.99	7353.34	9073.38	8936.24	4193.18	79.3935
3017.99	7525.27	9107.6	8890.7	3961.4	64.6874
3019.99	7670.94	9137.94	8831.63	3777.59	51.2529
3021.99	7787.97	9189.15	8735.88	3687.95	42.0368
3023.98	7871.43	9241.76	8590.26	3701.83	33.7997
3025.98	7916.73	9297.08	8379.92	3822.19	26.9026
3027.98	7913.73	9341.82	8104.57	4068.84	21.9448
3029.98	7865.22	9362.16	7771.67	4469.63	17.627
3031.98	7762.55	9363.98	7385.86	5008.09	13.7437
3033.98	7601.26	9361.09	6975.46	5639.11	11.4752
3035.98	7380.37	9357.36	6581.05	6234.44	8.73575
3037.97	7101.51	9349.1	6267.29	6778.48	6.32127
3039.97	6765.36	9308.85	6110.61	7254.16	5.04772
3041.97	6376.88	9217.34	6184.27	7645.11	3.6166
3043.97	5929.2	9069.02	6408.48	7928.73	2.70681
3045.97	5411.72	8860.25	6624.28	8070.1	2.08234
3047.97	4821.82	8579.56	6836.26	8073.08	0.88302
3049.97	4185.03	8227.66	7043.75	7923.62	0.397136
3051.97	3520.88	7814.21	7252.83	7603.2	0.491904
3053.96	2864.03	7376.28	7464.32	7115.21	3.63798e-13
3055.96	2252.9	6969.51	7677.79	6470.65	0.132462
3057.96	1753.74	6658.07	7897	5712.85	-0.3648
3059.96	1432.8	6451.62	8125.6	4909.09	-0.661876
3061.96	1160.86	6363.01	8366.17	4152.77	-0.696084
3063.96	922.743	6412.26	8619.66	3615.54	-0.379887
3065.96	735.085	6583.54	8875.92	3409.6	-0.71142
3067.95	594.47	6787.45	9110.72	2883.49	-0.231366
3069.95	494.488	6941.24	9313.16	2362.64	-0.43552
3071.95	441.256	7029.46	9471.55	2150.04	-0.630157
3073.95	444.496	7048.38	9569.83	1783.58	-0.790608
3075.95	519.35	7003.81	9602.52	1522.71	-0.798647
3077.95	684.101	6910.25	9583.76	1292.33	-1.02459
3079.95	957.528	6796.77	9527.28	1054.44	-0.845108
3081.95	1356.92	6685.46	9452.72	886.254	-1.39941
3083.94	1894.59	6595.62	9373.93	741.159	-1.41781
3085.94	2547.55	6543.04	9316.48	582.185	-1.7382
3087.94	3236.87	6519.26	9285.39	477.508	-1.61698
3089.94	3935.41	6530.87	9271.26	386.907	-1.64879
3091.94	4606.54	6579.58	9272.47	309.789	2.45643
3093.94	5241.89	6648.25	9283.35	247.846	16.4676
3095.94	5824.18	6731.25	9279.92	202.439	53.0944
3097.93	6336.48	6822.68	9256	162.754	127.701
3099.93	6768.91	6913.96	9209.8	131.886	261.351
3101.93	7105.89	7010.31	9135.17	106.551	480.525
3103.93	7336.53	7112.3	9022.36	85.1168	814.653
3105.93	7454.34	7215.84	8868.11	68.9309	1292.78
3107.93	7461.12	7299.05	8674.79	55.7158	1939.42
3109.93	7364.22	7348.64	8455.25	44.3669	2766.86
3111.93	7175.06	7360.27	8223.44	36.2056	3707.64
3113.92	6896.33	7338.67	8007.07	28.922	4692.93
3115.92	6544.81	7298.93	7839.57	22.9413	5621.28
3117.92	6156.22	7242.62	7751.44	18.9912	6464.97
3119.92	5793.32	7173.08	7684.56	14.9643	7217.42
3121.92	5522.77	7098.39	7643.55	11.659	7870.71
3123.92	5370.36	7029.33	7629.91	9.22767	8421.16
3125.92	5341.3	6981.64	7642.56	6.92606	8869.76
3127.91	5344.57	6968.58	7676.6	5.19647	9215.9
3129.91	5349.64	7001.88	7715.87	4.24406	9466.91
3131.91	5370.57	7070.38	7753.31	3.14909	9633.01
3133.91	5414.52	7129.2	7774.9	2.73626	9738.08
3135.91	5494.96	7167.61	7784.97	1.97656	9803.6
3137.91	5616.86	7190.73	7793.2	1.54622	9851.69
3139.91	5781.33	7205.09	7815.23	1.46126	9890.88
3141.91	5973.76	7215.86	7859.59	1.42992	9913.26
3143.9	6183.82	7220.07	7936.82	1.16256	9913.26
3145.9	6401.82	7217.11	8008.79	1.26743	9883.28
3147.9	6616.28	7186.56	8057.65	1.2062	9808.73
3149.9	6821.95	7133.92	8081.03	1.19419	9691.84
3151.9	7010.53	7064.15	8074.39	0.958835	9535.21
3153.9	7173.17	6985.87	8024.21	0.618175	9344.23
3155.9	7305.56	6915.9	7923.93	0.0797916	9123.94
3157.89	7411.31	6875.71	7780.55	0.255001	8887.6
3159.89	7488.2	6883.14	7605.69	0.310933	8656.03
3161.89	7536.61	6947.79	7426.38	0.59623	8435.34
3163.89	7559.98	7084.47	7289.82	0.869785	8228.88
3165.89	7558.35	7269.99	7257.15	0.860263	8059.58
3167.89	7539.28	7459.89	7311.99	0.91784	7946.74
3169.89	7508.09	7646.24	7377.06	1.07693	7915.45
3171.89	7462.77	7824.58	7449.53	1.28132	7980.8
3173.88	7397.54	7981.17	7531.72	1.56435	8080.74
3175.88	7302	8108.73	7622.56	1.50763	8186.03
3177.88	7179.39	8213.18	7717.95	1.48967	8276.43
3179.88	7034.22	8302.88	7818.41	3.69903	8342.06
3181.88	6872.14	8398.14	7927.82	12.9983	8370.43
3183.88	6712.08	8500.83	8038.09	33.7972	8360.48
3185.88	6563.85	8604.89	8142.47	72.1958	8307.9
3187.87	6425.67	8668.21	8237.24	136.744	8227.07
3189.87	6291.81	8622.96	8313.55	233.418	8131.96
3191.87	6176.05	8467.78	8382.11	369.946	8031.35
3193.87	6076.93	8202.07	8443.36	549.968	7937.75
3195.87	5972.87	7833.16	8499.93	775.235	7875.36
3197.87	5862.25	7377.77	8554.41	1041.6	7865.01
3199.87	5751.73	6841.23	8619.25	1299.32	7898.93
3201.87	5640.93	6243.54	8703.03	1502.43	7954.03
3203.86	5537.19	5591.5	8808.23	1650.68	8036.18
3205.86	5444.09	4871.42	8937.54	1767.46	8143.16
3207.86	5363.99	4082.54	9086.6	1869.43	8282.58
3209.86	5279.15	3268.67	9241.86	2025.17	8438.41
3211.86	5190.23	2499.49	9393.64	2259.46	8593.19
3213.86	5103.53	1885.71	9529.37	2554.2	8726.88
3215.86	5020.94	1535.17	9616.94	2878.07	8801.71
3217.85	4958.28	1224.68	9650.32	3202.23	8782.53
3219.85	4925.92	963.349	9635.72	3505.98	8664.11
3221.85	4931.16	751.624	9591.16	3834.73	8443.9
3223.85	4966.49	577.147	9523.31	4220.09	8124.98
3225.85	5031.82	436.716	9448.13	4703.01	7712.36
3227.85	5129.26	322.302	9386.81	5287.16	7218.47
3229.85	5260.06	228.608	9354.24	5925.55	6684.99
3231.85	5409.64	154.981	9328.5	6602.21	6171.51
3233.84	5546.67	94.9744	9302.01	7265.8	5750.98
3235.84	5679.97	45.9781	9281.51	7878.16	5502.65
3237.84	5807.85	7.33749	9268.06	8431.43	5422.24
3239.84	5923.13	-19.0161	9256.96	8917.51	5374.34
3241.84	6015.16	-31.9031	9236.71	9356.8	5312.21
3243.84	6076.83	-25.0422	9169.28	9770.76	5226.32
3245.84	6100.44	5.52229	9036.82	10183.5	5106.41
3247.83	6089.23	70.4958	8824.61	10616.6	4953.77
3249.83	6046.18	179.776	8536.63	11090.1	4775.85
3251.83	5985.41	341.057	8173.01	11588.1	4584.69
3253.83	5919.98	563.459	7744.44	12054.1	4390.64
3255.83	5859.27	849.855	7280.46	12478.9	4205.37
3257.83	5826.69	1190.51	6820.1	12833.4	4037.2
3259.83	5791.28	1503.95	6405.42	13099.2	3898.14
3261.83	5750.92	1808.38	6076.67	13259.3	3795.07
3263.82	5712.38	2095.82	5866.68	13323.4	3723.29
3265.82	5686.39	2366.35	5821.58	13319.8	3710.37
3267.82	5686.37	2597.21	5997.94	13274.6	3790.88
3269.82	5708.88	2812.59	6436.31	13209.5	3993.76
3271.82	5748.51	3037.51	7070	13167.3	4334.72
3273.82	5804.63	3260.67	7633.87	13107.9	4719
3275.82	5877.88	3504.05	8173.22	13008.1	5109.39
3277.81	5966.73	3794.35	8657.59	12864.5	5492.16
3279.81	6039.53	4147.22	9060.83	12682.8	5859.84
3281.81	6096.79	4559.82	9412.28	12470.3	6211.14
3283.81	6130.49	4976.49	9703.41	12233.3	6541.67
3285.81	6133.14	5367.3	9922.27	11996.5	6853.27
3287.81	6104.68	5721.62	10074.6	11767.4	7148.88
3289.81	6047.43	6034.48	10169.7	11547.5	7430.29
3291.81	5969.21	6305.83	10228.3	11327.8	7701.09
3293.8	5872.22	6545.89	10248.8	11119.9	7966.44
3295.8	5762.65	6761.58	10240.8	10949.7	8220.46
3297.8	5655.72	6962.43	10218.2	10837.3	8446.43
3299.8	5577.3	7140.96	10150.1	10774.5	8633.08
3301.8	5520.18	7277.6	10024.7	10728.5	8774.93
3303.8	5475.57	7361.5	9841.23	10695.1	8873.12
3305.8	5441.36	7380.1	9599.61	10665.7	8930.77
3307.79	5416.44	7333.97	9318.01	10619.2	8956.36
3309.79	5407.57	7231.09	9023.79	10555.6	8949.82
3311.79	5423.51	7091.08	8754.91	10482.5	8919.52
3313.79	5449.19	6917.67	8543.7	10406.8	8876.57
3315.79	5465.77	6733.84	8378.17	10336.6	8835.43
3317.79	5470.32	6554.61	8223.09	10267.5	8799.78
3319.79	5452.85	6402.55	8081.89	10200.5	8759.47
3321.79	5408.98	6307.29	7974.23	10118.2	8718.77
3323.78	5333.14	6243.97	7900.18	10012.9	8690.39
3325.78	5223.55	6214.35	7859.39	9896.68	8679.39
3327.78	5082.77	6187.97	7858.66	9769.97	8673.05
3329.78	4919.2	6166.16	7884.82	9638.78	8671.57
3331.78	4733.4	6153.16	7929.79	9511.92	8675.75
3333.78	4534.89	6154.26	7991.46	9396.51	8677.24
3335.78	4337.81	6167.18	8053.88	9298.84	8668.48
3337.77	4148.69	6184.35	8119.3	9224.45	8655.08
3339.77	3975.86	6210.61	8156.5	9186.85	8638.42
3341.77	3788.77	6235.98	8153.88	9175.39	8598.65
3343.77	3574.83	6240.32	8118.5	9179.36	8530.45
3345.77	3329.36	6231.02	8066.28	9203.78	8428.46
3347.77	3048.56	6215.82	8008.44	9240.77	8293.08
3349.77	2726.18	6193.03	7951.82	9277.76	8131.56
3351.77	2365.25	6166.57	7891.05	9312.52	7948.9
3353.76	1971.62	6136.86	7821.58	9329.32	7762.04
3355.76	1569.71	6108.41	7738.08	9322.92	7601.93
3357.76	1197.16	6098.94	7629.09	9274.14	7482.02
3359.76	912.221	6109.04	7465.68	9191.42	7430.71
3361.76	727.935	6120.01	7242.52	9086.21	7457.17
3363.76	587.664	6134.78	6954.93	8974.24	7507.67
3365.76	470.011	6154.72	6615.17	8860.15	7510.83
3367.75	374.125	6180.38	6231.52	8757.01	7456.13
3369.75	303.447	6212.77	5841.29	8671.37	7333.64
3371.75	264.166	6255.27	5499.3	8596.37	7145.5
3373.75	259.326	6294.76	5263.35	8535.72	6889.6
3375.75	298.257	6325.9	5174.98	8463.74	6566.39
3377.75	394.96	6335.43	5235.1	8376.27	6178.56
3379.75	558.14	6326.36	5430.37	8272.63	5744.35
3381.75	800.858	6304.45	5684.37	8154.3	5279.53
3383.74	1130.85	6284.32	5964.59	8026.27	4830.4
3385.74	1547.81	6282.53	6257.85	7890.55	4459.05
3387.74	1986.02	6299.99	6554.85	7733.72	4209.78
3389.74	2411.44	6324.52	6836.79	7558.08	4148.83
3391.74	2822.47	6355.96	7098.73	7372.26	4214.7
3393.74	3219.6	6392.52	7319.98	7201.75	4289.47
3395.74	3603.38	6430.09	7495.28	7058.33	4366.16
3397.73	3970.04	6455.43	7627.12	6956.8	4440.9
3399.73	4311.61	6456.42	7723.78	6910.21	4513.25
3401.73	4609.32	6433.29	7797.7	6894.6	4584.66
3403.73	4852.31	6377.31	7859.34	6905.99	4657.69
3405.73	5033.71	6286.57	7910.35	6937.91	4735.78
3407.73	5146.26	6164.01	7945.15	6989.01	4814.38
3409.73	5179.1	6009.95	7964.94	7057.96	4905.05
3411.73	5124.76	5832.27	7961.84	7109.25	5025.53
3413.72	4985.39	5646.33	7919.14	7111.98	5205.27
3415.72	4768.67	5456.62	7838.48	7077.67	5467.89
3417.72	4490.63	5270.74	7713.51	7016.98	5781.45
3419.72	4163.89	5113.27	7539.45	6929.76	6069.5
3421.72	3802.27	4958.19	7299.2	6823.04	6330.49
3423.72	3427.87	4827.54	6968.31	6711.87	6561.22
3425.72	3077.83	4747.04	6527	6605.07	6759.82
3427.71	2812.82	4745.09	5973.98	6517.76	6921.59
3429.71	2643.05	4840.73	5319.2	6476.98	7046.11
3431.71	2599.34	5014.19	4601.55	6494.14	7140.86
3433.71	2702.54	5221.28	3867.95	6557.41	7212.78
3435.71	2948.81	5432.84	3185.76	6652.39	7261.18
3437.71	3253.72	5636.19	2605.8	6757.56	7292.08
3439.71	3601.5	5824.06	2204.73	6869.17	7306.89
3441.71	3978.82	5991.12	2064.3	6980.64	7299.52
3443.7	4376.51	6142.29	2089.04	7084.41	7257.72
3445.7	4783.14	6279.95	2266.74	7171.5	7178.01
3447.7	5191.63	6397.66	2607.8	7242.79	7063.99
3449.7	5592.66	6503.66	3106.18	7310.04	6928.07
3451.7	5980.5	6613.75	3656.01	7389.82	6781.69
3453.7	6350.35	6733.78	4224.72	7483.69	6638.01
3455.7	6696.29	6854.32	4786.04	7593.99	6526.78
3457.69	7018.81	6967.36	5286.45	7702.76	6467.32
3459.69	7309.5	7062.35	5723.88	7800.19	6458.49
3461.69	7567.66	7120.52	6091.66	7881.38	6499
3463.69	7769.79	7125.39	6384.17	7923.47	6586.02
3465.69	7908.3	7081.36	6604.19	7915.6	6693.03
3467.69	7989.76	7006.62	6762.65	7859.65	6809.84
3469.69	8017.34	6913.4	6870.27	7753.16	6944.4
3471.69	7996.6	6811.16	6943.29	7590.01	7105.62
3473.68	7929.7	6725.65	6992.74	7367	7284.81
3475.68	7815.79	6677.7	7040.97	7087.09	7472.48
3477.68	7664.26	6627.52	7090.68	6764.92	7657.4
3479.68	7493.46	6575.47	7130.1	6402.34	7816.94
3481.68	7314.83	6527.21	7167.05	6000.17	7949.91
3483.68	7144.18	6488.02	7212.19	5553.5	8055.18
3485.68	6979.41	6455.72	7265.2	5095.29	8132.76
3487.67	6833.44	6425.3	7329.54	4689.26	8184.55
3489.67	6710.44	6393.21	7381.95	4358.49	8223.77
3491.67	6616.84	6358.64	7418.01	4162.34	8258.37
3493.67	6528.42	6298.19	7440.8	4177.11	8296.54
3495.67	6449.9	6195.01	7464.44	4466.34	8337.57
3497.67	6388.98	6045.42	7501.5	4812.2	8375.54
3499.67	6346.82	5863.2	7561.95	5203.5	8403.83
3501.67	6320	5652.07	7655.75	5612.29	8428.45
3503.66	6298.12	5437.14	7761.82	6029.93	8444.86
3505.66	6286.6	5256.6	7872.19	6443.24	8436.46
3507.66	6288.99	5114.46	7955.94	6842.63	8400.85
3509.66	6304.67	5029.56	7979.53	7226.98	8348.8
3511.66	6325.82	5034.47	7950.12	7589.11	8297.05
3513.66	6341.47	5137.88	7878.16	7930.15	8256.48
3515.66	6350.12	5263.15	7768.39	8250.96	8237.76
3517.65	6347.37	5399.22	7625.54	8535.14	8251.27
3519.65	6332.81	5536.67	7470.56	8752.14	8297.08
3521.65	6309.56	5676.41	7329.14	8903.4	8368.34
3523.65	6277.66	5816.2	7227.82	8993.12	8445.3
3525.65	6236.74	5954.44	7172.43	9029.53	8519.15
3527.65	6191.87	6090.15	7154.39	9013.61	8580.24
3529.65	6139.83	6220.39	7153.35	8952.33	8625.67
3531.65	6076.37	6341.46	7151.56	8851.82	8649.93
3533.64	6001.43	6461.49	7147.06	8728.13	8649.49
3535.64	5915.89	6581.24	7154.38	8573.71	8624.52
3537.64	5814.29	6702.93	7172.32	8399.46	8573.11
3539.64	5703.4	6817.39	7208.43	8223.46	8500.13
3541.64	5601.7	6908.59	7268.52	8091.05	8412.34
3543.64	5525.45	6966.36	7345.23	8061.12	8316.8
3545.64	5477.61	6967.57	7407.54	8134.86	8223.77
3547.63	5466.27	6908.59	7445.76	8255.04	8136.17
3549.63	5484.75	6772.62	7464.99	8396.49	8049.6
3551.63	5495.37	6550.17	7473.79	8557.59	7952.41
3553.63	5511.71	6229.49	7473.58	8701.81	7844.98
3555.63	5540.82	5816.27	7463.63	8789.14	7729.41
3557.63	5588.35	5308.85	7459.03	8814.92	7613.56
3559.63	5653.8	4711.47	7466.73	8768.55	7501.32
3561.63	5743.44	4072.92	7501.38	8626.98	7392.43
3563.62	5859.68	3476.39	7566.82	8398.47	7289.39
3565.62	5986.72	3017.99	7672.99	8088.36	7196.76
3567.62	6082.57	2808.13	7806.82	7704.46	7118.75
3569.62	6154.07	2855.86	7932.72	7273.11	7054.45
3571.62	6202.92	3151.96	8055	6848.66	7011.31
3573.62	6228.35	3540.99	8172.71	6483.52	6994.24
3575.62	6224.04	3934.58	8283.6	6246.89	7003.87
3577.61	6189.91	4322.44	8375.89	6177.49	7030.86
3579.61	6138.11	4700.84	8442.86	6292.56	7081.51
3581.61	6078.87	5064.45	8483.87	6596.38	7159.56
3583.61	6032.42	5397.9	8503.35	6893.02	7259.32
3585.61	6007.79	5689.19	8506.98	7147.05	7384.66
3587.61	6009.61	5942.61	8493.42	7362.06	7539.84
3589.61	6046.65	6167.12	8481.23	7535.02	7723.93
3591.61	6118.01	6374.67	8475.59	7669.15	7944.22
3593.6	6177.83	6573.17	8482.38	7765.3	8207.92
3595.6	6226.41	6773.04	8487.44	7834.62	8479.05
3597.6	6229.89	6976.76	8464.71	7889.71	8713.52
3599.6	6189.95	7183.31	8416.42	7940.42	8886.7
3601.6	6107.4	7352.65	8355.59	7994.73	8980.4
3603.6	5976.15	7466.35	8295.02	8068.16	8989.76
3605.6	5791.69	7513.73	8252.15	8158.01	8919.01
3607.59	5553.27	7501.86	8253.56	8235.48	8785.43
3609.59	5266.04	7443.28	8313.33	8308.2	8604.32
3611.59	4941.51	7346.1	8358.11	8378.1	8393.26
3613.59	4594.93	7232.74	8386.07	8435.17	8188.84
3615.59	4223.62	7138.58	8406.06	8473.43	8041.35
3617.59	3845.86	7089.53	8433.64	8482.62	7990.34
3619.59	3482.41	7111.07	8492.04	8472.77	8008.66
3621.59	3169.06	7170.13	8584.43	8452.97	8052.82
3623.58	2934.58	7230.47	8719.11	8422.91	8119.05
3625.58	2812.76	7291.96	8839.54	8389.28	8185.19
3627.58	2843.99	7341.81	8933.61	8364.54	8246.22
3629.58	3047.76	7381.81	9000.19	8359.84	8302.67
3631.58	3323.7	7406.54	9043.59	8373.31	8354.21
3633.58	3590.91	7409.71	9051.87	8379.1	8400.45
3635.58	3840.47	7374.66	8997.76	8376.64	8441.64
3637.57	4068.26	7304.05	8857.64	8370.95	8476.58
3639.57	4266.26	7193.72	8611.94	8361.01	8495.92
3641.57	4433.37	7043.65	8252.1	8342.31	8489.27
3643.57	4574.81	6862	7761.95	8310.25	8458.75
3645.57	4692.23	6649.37	7135.9	8268.27	8415.84
3647.57	4780.88	6414.47	6396.39	8197.62	8364.27
3649.57	4846.89	6172.77	5577.96	8080.14	8316.32
3651.57	4904.93	5931.37	4738.56	7897.53	8276.75
3653.56	4965.33	5683.4	3951.26	7638.09	8238.87
3655.56	5028.74	5437.33	3307.96	7289.88	8192.46
3657.56	5081.85	5215.89	2952.74	6838.22	8143.37
3659.56	5118.54	5042.95	2954.06	6267.46	8096.72
3661.56	5148.69	4908.68	3181.94	5572.67	8060.47
3663.56	5173.94	4801.72	3618.76	4768.04	8039.72
3665.56	5194.12	4686.03	4261.98	3904.78	8042.82
3667.55	5215.42	4557.38	4956.91	3074.01	8067.77
3669.55	5237.16	4424.26	5654.98	2382.6	8100.6
3671.55	5242	4293.03	6335.18	1891.63	8130.18
3673.55	5234.67	4173.23	6988.35	1542	8155.68
3675.55	5223.26	4079.64	7604.51	1265.61	8165.11
3677.55	5219.32	4022.94	8184.33	1033.32	8153.33
3679.55	5229.74	4011.25	8720.6	839.603	8120.44
3681.55	5262.75	4036.15	9208.53	681.848	8063.26
3683.54	5309.24	4079.88	9641.86	552.47	7990.22
3685.54	5354.9	4136.79	10014.4	447.519	7912.9
3687.54	5395.74	4191.05	10330.3	369.553	7843.01
3689.54	5430.51	4242.83	10579.4	319.311	7781.94
3691.54	5462.48	4304.02	10758.7	303.645	7736.28
3693.54	5482.08	4393.52	10861.1	332.579	7706.65
3695.54	5500.09	4528.46	10871.3	419.662	7685.57
3697.53	5529.52	4715.98	10772.7	585.543	7661.77
3699.53	5570.59	4946.53	10565.7	850.54	7624.62
3701.53	5621.36	5195.92	10255.2	1233.04	7574.72
3703.53	5677.92	5436.14	9842.36	1748.68	7503.97
3705.53	5729.02	5672.3	9356.76	2402.32	7424.17
3707.53	5745.69	5912.89	8851.78	3103.25	7342.69
3709.53	5698.69	6158.37	8390.04	3790.07	7272.63
3711.53	5586.6	6410.29	7992.27	4474.53	7213.33
3713.52	5427.3	6652.93	7703.78	5153.18	7178.31
3715.52	5245.1	6878.86	7613.08	5813.46	7168.89
3717.52	5044.5	7083.77	7690.48	6435.33	7169.33
3719.52	4857.88	7261.31	7724.42	6996.21	7172.22
3721.52	4714.43	7400.66	7778.86	7493.54	7171.56
3723.52	4632.34	7499.56	7850.09	7915.99	7166.56
3725.52	4601.23	7561	7939.61	8262.1	7157.46
3727.51	4599.42	7582.94	8055.87	8532.75	7142.57
3729.51	4609.01	7572.95	8204.6	8736.54	7120.02
3731.51	4635.86	7528.21	8375.3	8874.02	7092.22
3733.51	4686.65	7454.17	8539.93	8958.25	7057.72
3735.51	4769.42	7338.01	8666.19	9015.21	7020.69
3737.51	4891.33	7173.22	8757.25	9060.33	6988.46
3739.51	5056.66	6950.14	8822.79	9070.34	6980.43
3741.51	5248.64	6661.63	8867.56	9058.29	7009.76
3743.5	5439.25	6307.13	8900.58	9038.48	7069.05
3745.5	5622.98	5900.41	8924.64	9026.44	7137.86
3747.5	5796.4	5479.65	8931.7	9042.55	7205.33
3749.5	5961.44	5107.95	8925.96	9116.69	7271.65
3751.5	6104.99	4861.07	8916.52	9263.11	7340.01
3753.5	6227.71	4823.99	8902.52	9447.42	7415.21
3755.5	6323.64	5063.42	8881.14	9618.59	7505.49
3757.5	6378.32	5317.77	8864.11	9773.54	7618.12
3759.49	6387.71	5569.05	8865.54	9909.78	7737.26
3761.49	6352.02	5801.07	8905.1	10007	7850.83
3763.49	6277.58	6004.83	9005.44	10071.3	7953.36
3765.49	6169.38	6172.7	9181.56	10093	8036.43
3767.49	6028.42	6300.64	9437.81	10086	8107.82
3769.49	5874.32	6400.56	9725.03	10056.4	8158.97
3771.49	5682.97	6482.46	9987.81	10008.8	8195.52
3773.48	5450.58	6540.27	10200.5	9950.76	8217.4
3775.48	5160.68	6553.06	10350.2	9890.09	8227.38
3777.48	4821.73	6526.49	10430.2	9838.51	8232.06
3779.48	4451.06	6477.27	10441	9741.3	8241.4
3781.48	4050.57	6414.78	10386	9579.21	8262.12
3783.48	3604.63	6345.48	10272.9	9359.17	8297.78
3785.48	3147.81	6279.06	10109.1	9072.75	8343.93
3787.48	2694.75	6217.59	9912.43	8705.21	8399.81
3789.47	2251.25	6163.35	9717.53	8232	8448.47
3791.47	1833.7	6118.01	9559.07	7641.51	8471.29
3793.47	1450	6089.73	9447.24	6942.96	8455.26
3795.47	1117.97	6086.99	9330.38	6170.82	8400.93
3797.47	869.462	6120.99	9178.27	5379.72	8311.51
3799.47	703.414	6196.37	8990.19	4638.42	8201.76
3801.47	564.981	6322.45	8772.78	4005.2	8080.15
3803.46	449.739	6503.39	8529.12	3476.76	7961
3805.46	352.915	6696.08	8277.39	3079.72	7854.2
3807.46	275.473	6880.13	8021.81	2887.63	7756.98
3809.46	212.318	7047.13	7728.3	2962.79	7651.81
3811.46	160.518	7183.64	7402.44	3253.73	7545.86
3813.46	119.715	7277.54	7061.52	3647.26	7442.25
3815.46	86.5175	7331.5	6730.5	4033.33	7348.29
3817.46	59.0627	7345.46	6449.39	4396.37	7268
3819.45	37.9697	7332.32	6227.07	4728.62	7208.64
3821.45	20.1916	7296.07	6042.39	5029.74	7159.49
3823.45	5.82004	7253.18	5916.98	5296.99	7119.67
3825.45	-5.12997	7216.09	5873.97	5538.74	7090.51
3827.45	-11.5965	7176.13	5904.41	5771.84	7064.51
3829.45	-12.3863	7116.42	6022.81	6015.27	7039.46
3831.45	-4.06754	7032.87	6243.63	6286.31	7013
3833.44	15.6151	6898.65	6478.71	6579.06	6995.6
3835.44	49.9715	6693.67	6703.52	6889.28	6986.1
3837.44	102.528	6416.08	6929.12	7212.68	6977.79
3839.44	174.173	6066.95	7155.79	7541.42	6970.82
3841.44	268.317	5671.4	7384.24	7879.14	6964.1
3843.44	386.3	5273.3	7617.38	8224.75	6956.4
3845.44	526.11	4913.91	7848.09	8543.46	6942.83
3847.44	647.812	4670.34	8064.87	8834.98	6928.81
3849.43	760.431	4595.64	8265.6	9079.43	6921.79
3851.43	888.649	4752.31	8432.76	9258.7	6928.37
3853.43	1062.65	4990.85	8560.52	9377.47	6945.59
3855.43	1312.94	5260.23	8641.64	9453.52	6965.67
3857.43	1653.91	5537.56	8660.95	9514.21	6987.81
3859.43	2108.48	5797.3	8615.42	9573.99	7007.66
3861.43	2612.44	6028.92	8521.58	9640.26	7006.19
3863.42	3115.59	6231.55	8390.47	9717.08	6979.1
3865.42	3586.99	6413.32	8236.8	9813.62	6931.76
3867.42	4009.81	6586.56	8085.31	9914.82	6866.4
3869.42	4371.65	6761.88	7972.55	9978.32	6787.31
3871.42	4674.81	6927.18	7917.98	9988.84	6703.93
3873.42	4925.66	7085.77	7863.12	9953.21	6621.14
3875.42	5128.74	7236.35	7810.01	9879.93	6527.17
3877.42	5294.03	7359.06	7768.64	9779.28	6415.69
3879.41	5433.12	7436.65	7742.34	9656.15	6273.49
3881.41	5562.24	7470.05	7734.95	9530.56	6068.41
3883.41	5684.83	7464.91	7754.16	9428.14	5786.48
3885.41	5815.1	7433.22	7793.3	9348.09	5417.49
3887.41	5923.15	7379.4	7847.91	9279.68	4958.4
3889.41	6003.35	7325.18	7916.36	9233.03	4419.85
3891.41	6052.54	7281.92	7998.14	9197.88	3825.53
3893.4	6084.71	7240.5	8093.5	9125	3211.56
3895.4	6120.48	7215.42	8209.95	8972.68	2631.8
3897.4	6175.92	7194.02	8338.37	8722.61	2148.62
3899.4	6268.68	7162.16	8472.64	8356.63	1841.15
3901.4	6412.47	7116.06	8598.28	7857.02	1784.04
3903.4	6616.41	7051.52	8709.33	7217.83	1863.2
3905.4	6787.6	6976.53	8818.73	6439.96	2085.26
3907.4	6908.91	6895.69	8935.1	5557.84	2448.81
3909.39	6980.03	6818.49	9058.5	4628.53	2918.67
3911.39	7005	6756.51	9186.95	3736.23	3400.35
3913.39	6990.08	6723.31	9269.71	3018.36	3875.6
3915.39	6931.38	6711.52	9263.14	2581.96	4339.98
3917.39	6828.22	6709.88	9145.85	2343.47	4784.97
3919.39	6679.13	6724.05	8906.2	2329.49	5204.02
3921.39	6486.33	6738.41	8539.8	2505.23	5591.56
3923.38	6243.84	6743.7	8029.76	2865.51	5943.79
3925.38	5933.59	6724.2	7378.64	3409.23	6258.86
3927.38	5560.94	6665.67	6611.2	4040.93	6537.2
3929.38	5145.5	6557.78	5746.52	4648.73	6776.49
3931.38	4708.28	6375.91	4824.06	5231.41	6975.67
3933.38	4297.86	6123.73	3910.71	5790.49	7137.24
3935.38	3955.44	5794.62	3083.68	6325.57	7263.47
3937.38	3730.78	5383.46	2462.89	6834.95	7358.32
3939.37	3666.85	4906.19	2087.74	7316.2	7432.25
3941.37	3795.45	4390.37	1707.66	7754.71	7474.82
3943.37	3987.42	3882.81	1430.12	8139.8	7479.73
3945.37	4195.58	3441.66	1224.54	8460.75	7456.31
3947.37	4401.54	3149.53	1088.18	8708.62	7419.22
3949.37	4608.06	3009.29	1026.31	8867.81	7377.52
3951.37	4816.31	3020.39	1049.33	8952.72	7341.08
3953.36	5023.89	3045.99	1174.07	8972.53	7319.38
3955.36	5225.18	3072.49	1411.07	8936.05	7315.37
3957.36	5399.9	3101.4	1771.88	8863.72	7331.34
3959.36	5547.16	3144.5	2262.49	8762.42	7361.55
3961.36	5662.82	3213	2825	8654.73	7408.46
3963.36	5744.91	3315.38	3396.27	8534.7	7463.56
3965.36	5802.49	3464.41	3970.23	8407.4	7508.52
3967.36	5837.29	3672.49	4532.64	8282.31	7536.34
3969.35	5854.36	3926.37	5075.31	8165.95	7534.5
3971.35	5855.35	4194.28	5589.56	8059.13	7497.3
3973.35	5848.02	4440.34	6065.01	7980.91	7414.86
3975.35	5841.26	4659.24	6489.21	7946.79	7287.06
3977.35	5828.54	4857.75	6850.56	7947.98	7126.65
3979.35	5818.77	5039.32	7149.27	7978.17	6946.33
3981.35	5817.59	5206.15	7386.97	8030.78	6771.23
3983.34	5833.85	5356.51	7573.08	8095.32	6629.77
3985.34	5877.66	5470.01	7712.86	8161.12	6557.11
3987.34	5947.09	5547.47	7817.71	8214.41	6596.15
3989.34	6049.62	5586.86	7903.64	8250.66	6715.31
[truncated: 1,004 more rows]
