# Supplementary material for: Ionogel thin films as a compatibilizing pretreatment for electrospray deposition
Source: Royal Society of Chemistry journal article supplement (doi:10.1039/d5lp00359h), 2026-01-01
Supplement: d5lp00359h1.zip [file Porous B data - aligned.xlsx]

## Sheet: Sheet1
Lateral	Height Data	Height Data	Height Data	Height Data	Height Data
µm	µm	µm	µm	µm	µm
	C1	C2	C3	C4	C5
0	0.00714902	1.50824	1.07916	0.559242	0.0218483
0.499875	0.00693005	1.59667	1.01996	0.599518	0.0216501
0.99975	0.00687728	1.66056	0.967449	0.644617	0.0213449
1.49963	0.00624823	1.70617	0.919277	0.694522	0.0210503
1.9995	0.00631185	1.74044	0.874019	0.74876	0.0208914
2.49938	0.00648213	1.7686	0.834784	0.804971	0.0206143
2.99925	0.00675402	1.79445	0.802737	0.866782	0.0202093
3.49913	0.00686115	1.81864	0.775972	0.936885	0.019929
3.999	0.00690811	1.84109	0.75557	1.00809	0.0196574
4.49888	0.00675738	1.85847	0.739643	1.07864	0.019272
4.99875	0.00715633	1.8704	0.726527	1.14625	0.0187774
5.49863	0.0072235	1.87645	0.71618	1.20967	0.0188157
5.9985	0.00730358	1.87838	0.70715	1.26672	0.0182685
6.49838	0.00701061	1.87748	0.699873	1.31901	0.0182507
6.99825	0.00684398	1.87607	0.692994	1.36586	0.0180229
7.49813	0.00682262	1.8763	0.687994	1.40826	0.0178201
7.998	0.00670044	1.87989	0.683966	1.44724	0.0173893
8.49788	0.00697301	1.88603	0.681904	1.48391	0.0172361
8.99775	0.00662511	1.89246	0.680843	1.51654	0.0168734
9.49763	0.00663314	1.89712	0.681317	1.54568	0.0168055
9.9975	0.00612469	1.89861	0.681892	1.57382	0.0166672
10.4974	0.0059725	1.89522	0.6838	1.59979	0.0165777
10.9973	0.00557254	1.88588	0.687241	1.62416	0.0162826
11.4971	0.00543383	1.86964	0.69229	1.64492	0.0162808
11.997	0.00519977	1.84449	0.698855	1.66259	0.0160743
12.4969	0.00512758	1.80988	0.707026	1.67723	0.0160275
12.9968	0.00472479	1.76518	0.716297	1.68883	0.0158871
13.4966	0.00500205	1.71092	0.726423	1.70084	0.0156413
13.9965	0.00472074	1.64705	0.736938	1.71379	0.0155371
14.4964	0.00474093	1.57495	0.747171	1.72547	0.0151982
14.9963	0.00457076	1.49542	0.756416	1.73852	0.0149958
15.4961	0.00482991	1.40934	0.765244	1.75013	0.014938
15.996	0.00476009	1.31644	0.773039	1.75787	0.0145191
16.4959	0.00483573	1.21878	0.780123	1.76364	0.0142347
16.9958	0.00454732	1.11672	0.786419	1.76337	0.0141007
17.4956	0.00451587	1.01277	0.792073	1.75622	0.0138734
17.9955	0.0041301	0.907375	0.797725	1.73989	0.013679
18.4954	0.00415216	0.802031	0.803753	1.71631	0.0132734
18.9953	0.00410656	0.699328	0.810752	1.69019	0.0131652
19.4951	0.00411943	0.60142	0.818518	1.6659	0.013115
19.995	0.00431849	0.510141	0.827799	1.64565	0.0129831
20.4949	0.00406707	0.427746	0.839068	1.63079	0.0132518
20.9948	0.00422599	0.35475	0.853111	1.62099	0.0126426
21.4946	0.00416798	0.291626	0.86985	1.61768	0.0123766
21.9945	0.00437112	0.23886	0.89041	1.6133	0.0118447
22.4944	0.00406798	0.196882	0.914425	1.60584	0.0114252
22.9943	0.00386614	0.161739	0.941795	1.5962	0.0113867
23.4941	0.00327662	0.132275	0.971878	1.58419	0.0108534
23.994	0.0033191	0.108148	1.00368	1.56885	0.0106902
24.4939	0.00314517	0.0892754	1.0356	1.55395	0.0100293
24.9938	0.00312377	0.0738385	1.06631	1.5407	0.00974436
25.4936	0.00288106	0.0614332	1.09392	1.5306	0.00935309
25.9935	0.00279059	0.0512878	1.11704	1.52169	0.00922909
26.4934	0.00261105	0.0431528	1.13514	1.5203	0.00861734
26.9933	0.00247034	0.0363211	1.14747	1.5219	0.00851192
27.4931	0.00237624	0.0307555	1.15428	1.52189	0.00792245
27.993	0.00245907	0.0262272	1.15744	1.52258	0.00746649
28.4929	0.00221435	0.0225461	1.15812	1.52082	0.00766857
28.9928	0.00238704	0.0195551	1.15751	1.51471	0.0063961
29.4926	0.00235664	0.0169986	1.15911	1.50556	0.00740213
29.9925	0.0023594	0.0150231	1.16272	1.49541	0.00595909
30.4924	0.00189034	0.0130461	1.1662	1.48543	0.0060178
30.9923	0.0019551	0.0118808	1.16702	1.48006	0.00613921
31.4921	0.00219808	0.0106121	1.16452	1.48075	0.00579012
31.992	0.00222328	0.00968971	1.15834	1.48786	0.00557189
32.4919	0.00200109	0.00871266	1.14836	1.49708	0.0047345
32.9918	0.00189749	0.00828565	1.13369	1.50871	0.00504473
33.4916	0.00154136	0.00777068	1.11405	1.52461	0.00414806
33.9915	0.00131344	0.0075156	1.09168	1.54337	0.00453273
34.4914	0.00123413	0.00712981	1.07025	1.56315	0.00422493
34.9913	0.00118901	0.00684701	1.05218	1.58248	0.00381439
35.4911	0.000928017	0.00641308	1.03769	1.59863	0.00368514
35.991	0.000956011	0.00670608	1.02494	1.61143	0.00334259
36.4909	0.000782323	0.00659732	1.01408	1.62245	0.00353196
36.9908	0.000652477	0.00667874	1.00194	1.63024	0.00311938
37.4906	0.000823112	0.0064385	0.988963	1.63639	0.00282973
37.9905	0.000788655	0.0063654	0.975609	1.64166	0.00267405
38.4904	0.000654163	0.00634097	0.963722	1.64473	0.0019005
38.9903	0.000413881	0.00636169	0.952614	1.64274	0.00214591
39.4901	0.000574702	0.00629391	0.941724	1.63381	0.00155493
39.99	0.000390681	0.0063786	0.931923	1.61847	0.00173579
40.4899	0.000226946	0.00623168	0.924277	1.59641	0.000947615
40.9898	-3.1777e-05	0.00609032	0.9182	1.56971	0.00118385
41.4896	0	0.00595549	0.91365	1.54065	0.000845967
41.9895	7.85633e-05	0.00582742	0.910157	1.51794	0.000288741
42.4894	0.000189377	0.0055789	0.907949	1.50195	0.00066517
42.9893	-6.35129e-05	0.00558532	0.906596	1.48541	0.00024203
43.4891	-0.000318111	0.00534553	0.906743	1.46661	0
43.989	-0.00043736	0.00497179	0.907988	1.45224	0.000340541
44.4889	-0.000661223	0.0049714	0.909855	1.44011	0.000260762
44.9888	-0.000860597	0.0045994	0.911714	1.42812	0.000104031
45.4886	-0.000775849	0.00447505	0.913218	1.41503	0.000366462
45.9885	-0.00103546	0.00398248	0.914752	1.40324	0.000287349
46.4884	-0.000901316	0.00375044	0.91671	1.39649	-0.000287951
46.9883	-0.00125197	0.00367243	0.920613	1.39245	-0.000225584
47.4881	-0.00134932	0.00374683	0.925553	1.3899	-0.000122223
47.988	-0.00167994	0.00320388	0.932012	1.38592	-0.000612663
48.4879	-0.00186012	0.00315739	0.939902	1.38031	-0.000688462
48.9878	-0.00199243	0.00274581	0.950295	1.37111	-0.000686603
49.4876	-0.00193657	0.00259068	0.963126	1.35853	-0.000594136
49.9875	-0.00206074	0.00220585	0.978612	1.34153	-0.000910166
50.4874	-0.00199039	0.0023524	0.996583	1.32272	-0.000252484
50.9873	-0.00184629	0.00179138	1.01683	1.30054	7.40708e-06
51.4871	-0.00176456	0.00177359	1.03758	1.27633	-5.4296e-05
51.987	-0.00176059	0.00170393	1.0593	1.25278	-0.000205815
52.4869	-0.00171845	0.00195702	1.08067	1.23071	5.95224e-05
52.9868	-0.00176762	0.0017737	1.10231	1.20899	-0.000260095
53.4866	-0.00178576	0.00188686	1.12267	1.18494	7.4704e-05
53.9865	-0.001769	0.00192382	1.14238	1.15884	6.89122e-05
54.4864	-0.00184071	0.0018722	1.16135	1.13265	-0.00018241
54.9863	-0.00187399	0.00172716	1.18076	1.10452	-0.000309541
55.4861	-0.00173646	0.00174311	1.20012	1.07793	-0.000432373
55.986	-0.00167698	0.00180103	1.22027	1.05384	-0.000427764
56.4859	-0.00182805	0.0018951	1.24131	1.03069	-0.00092865
56.9858	-0.00181009	0.00176267	1.2636	1.0091	-0.00118685
57.4856	-0.00160683	0.00164199	1.28663	0.98808	-0.0014296
57.9855	-0.00159142	0.00178478	1.3106	0.966653	-0.00152384
58.4854	-0.00177085	0.00155792	1.33502	0.943764	-0.00184412
58.9853	-0.00138505	0.00144702	1.36093	0.921661	-0.00201996
59.4851	-0.00130529	0.00108066	1.38886	0.900188	-0.00229913
59.985	-0.00105521	0.000962948	1.41876	0.880928	-0.0024374
60.4849	-0.00101983	0.000857318	1.45037	0.864036	-0.00281663
60.9848	-0.00108723	0.000762559	1.48255	0.848093	-0.0029462
61.4846	-0.00112706	0.000300002	1.51462	0.835993	-0.00345429
61.9845	-0.00125336	0.000354072	1.54534	0.828309	-0.00359614
62.4844	-0.00120663	6.94382e-05	1.57328	0.820458	-0.00423866
62.9843	-0.000854379	-5.39623e-05	1.59761	0.813167	-0.00463021
63.4841	-0.000712451	-0.000248554	1.6179	0.805619	-0.00474139
63.984	-0.0006875	0	1.63346	0.800208	-0.00506432
64.4839	-0.00104683	-0.000175679	1.64581	0.796028	-0.00560441
64.9838	-0.0011616	9.60456e-05	1.65411	0.793236	-0.00547039
65.4836	-0.00138268	-4.8103e-05	1.65898	0.790323	-0.00577661
65.9835	-0.00131873	0.00014057	1.6587	0.788877	-0.00604231
66.4834	-0.00145414	0.000302971	1.65236	0.788616	-0.00600847
66.9833	-0.00141009	0.000812305	1.63769	0.788409	-0.00630076
67.4831	-0.00130062	0.000906222	1.61328	0.788712	-0.00655368
67.983	-0.00125345	0.00106008	1.5782	0.788007	-0.00650536
68.4829	-0.00114947	0.00139813	1.53423	0.786198	-0.00690629
68.9828	-0.00137105	0.00166243	1.4795	0.785099	-0.00663516
69.4826	-0.00104532	0.00171201	1.41642	0.785266	-0.00693657
69.9825	-0.00104717	0.00179407	1.34599	0.785984	-0.00682549
70.4824	-0.000902075	0.00179526	1.27289	0.788254	-0.00729097
70.9823	-0.00112177	0.00197904	1.20092	0.790169	-0.00719996
71.4821	-0.0012163	0.00235924	1.13526	0.792538	-0.0073974
71.982	-0.00130005	0.00242883	1.07727	0.795354	-0.00725352
72.4819	-0.00136866	0.00279903	1.02505	0.799626	-0.00688095
72.9818	-0.00167052	0.00283662	0.97784	0.804348	-0.00692479
73.4816	-0.00169962	0.0031469	0.931171	0.81021	-0.00653457
73.9815	-0.00169448	0.00296822	0.885242	0.816519	-0.00672547
74.4814	-0.00166176	0.0031597	0.842051	0.823809	-0.00690133
74.9813	-0.00186137	0.00284615	0.802251	0.831005	-0.0064279
75.4811	-0.00204633	0.0030189	0.767651	0.838545	-0.00719634
75.981	-0.0023282	0.00281036	0.737468	0.846937	-0.00685324
76.4809	-0.00231297	0.00270945	0.710939	0.856834	-0.00712857
76.9808	-0.0023584	0.00222412	0.687606	0.867333	-0.0076847
77.4806	-0.00234107	0.00237049	0.666479	0.879313	-0.00738702
77.9805	-0.0022644	0.00204578	0.645839	0.891316	-0.00810993
78.4804	-0.00201414	0.00187042	0.625458	0.903882	-0.00850061
78.9803	-0.0022378	0.00186334	0.606577	0.915476	-0.00902525
79.4801	-0.00220385	0.00190367	0.589362	0.925583	-0.00903412
79.98	-0.00240615	0.00185747	0.574041	0.934409	-0.0100109
80.4799	-0.00272099	0.00184091	0.558852	0.944666	-0.00968976
80.9798	-0.00275539	0.0016005	0.543059	0.951854	-0.0100339
81.4796	-0.00274291	0.00151441	0.526202	0.955996	-0.0100707
81.9795	-0.00268874	0.00134583	0.509064	0.956199	-0.0100478
82.4794	-0.00260562	0.0014765	0.491598	0.95448	-0.0104877
82.9793	-0.00288936	0.00153384	0.473915	0.951662	-0.0104023
83.4791	-0.00305385	0.00150222	0.455825	0.948845	-0.0105359
83.979	-0.00309109	0.00162401	0.438967	0.947303	-0.0110324
84.4789	-0.00350227	0.00139289	0.425285	0.947736	-0.011259
84.9788	-0.00365699	0.0011781	0.414851	0.948025	-0.0115669
85.4786	-0.0039057	0.000994488	0.407337	0.946608	-0.011446
85.9785	-0.00398381	0.00135794	0.402995	0.944286	-0.0115202
86.4784	-0.00399921	0.0013931	0.400403	0.942574	-0.011687
86.9783	-0.00407274	0.00132652	0.399488	0.94188	-0.0117034
87.4781	-0.003953	0.000907946	0.399616	0.940163	-0.0120737
87.978	-0.00401712	0.00103242	0.401128	0.937214	-0.0124248
88.4779	-0.0038984	0.000976544	0.40412	0.934292	-0.0126103
88.9778	-0.00346846	0.00123637	0.408043	0.931985	-0.0124868
89.4776	-0.00424598	0.00130348	0.412567	0.92973	-0.0126809
89.9775	-0.00385409	0.00152463	0.41734	0.927907	-0.0125792
90.4774	-0.00349291	0.00137271	0.422994	0.925104	-0.0129344
90.9773	-0.00381038	0.00144585	0.43013	0.923764	-0.0128771
91.4771	-0.00368631	0.000857226	0.437008	0.920834	-0.0131461
91.977	-0.0028418	0.000854716	0.442947	0.916947	-0.0129928
92.4769	-0.00304678	0.000211362	0.447241	0.913728	-0.0132863
92.9768	-0.00283264	0.000185313	0.450391	0.909698	-0.0132837
93.4766	-0.00254289	-0.000194973	0.454188	0.906332	-0.0133495
93.9765	-0.00266389	-0.000179822	0.459678	0.903615	-0.0132398
94.4764	-0.00254107	-0.00026037	0.467674	0.899428	-0.0133382
94.9763	-0.00161542	-0.000450064	0.477808	0.894619	-0.0132829
95.4761	-0.00136726	-0.000879486	0.491245	0.888972	-0.0137057
95.976	-0.000187601	-0.00103843	0.508161	0.882797	-0.0137342
96.4759	-9.74537e-05	-0.00115633	0.529892	0.877311	-0.0139796
96.9758	0.00159297	-0.00122755	0.555092	0.871596	-0.0138201
97.4756	0.00233006	-0.00124763	0.583615	0.863919	-0.0138817
97.9755	0.00146697	-0.00133965	0.615422	0.855974	-0.014309
98.4754	0.00195871	-0.00150291	0.649917	0.847318	-0.0144696
98.9753	0.00220751	-0.00148101	0.68393	0.839163	-0.0148388
99.4751	0.000540225	-0.00139532	0.716326	0.831366	-0.014774
99.975	-0.000268809	-0.00113185	0.746369	0.824617	-0.0147562
100.475	-0.000470352	-0.00108741	0.774335	0.815926	-0.0146672
100.975	-0.000257563	-0.00141649	0.799811	0.807293	-0.0148914
101.475	0	-0.00149854	0.823942	0.799352	-0.0146839
101.975	-0.00123117	-0.00169503	0.846277	0.791867	-0.0149188
102.474	-0.000563519	-0.00162526	0.867673	0.784812	-0.0146059
102.974	-0.00119171	-0.00190748	0.887871	0.777886	-0.0148664
103.474	-0.00176302	-0.00178663	0.907157	0.771769	-0.0148344
103.974	-0.000961006	-0.00212069	0.925082	0.765606	-0.0151153
104.474	-0.00113406	-0.00215176	0.940939	0.759858	-0.0148191
104.974	-0.00119167	-0.00209919	0.953178	0.753832	-0.0148026
105.474	0.000270716	-0.00156961	0.961878	0.748295	-0.0144503
105.974	-0.000146325	-0.00168026	0.967481	0.742506	-0.0145171
106.473	-0.000389228	-0.00141713	0.970299	0.735572	-0.0142677
106.973	0.000964469	-0.00108353	0.971496	0.728417	-0.0139478
107.473	0.00090653	-0.000340503	0.96994	0.720837	-0.0142013
107.973	0.000234213	0.000559482	0.965672	0.713222	-0.0140336
108.473	0.00135219	0.002011	0.959126	0.706197	-0.0137998
108.973	0.00153024	0.00417526	0.95188	0.70009	-0.0138841
109.473	0.00158257	0.00705035	0.944606	0.695764	-0.0137933
109.973	0.00126544	0.0106724	0.93709	0.692693	-0.0133942
110.472	0.00124197	0.0154529	0.929078	0.690915	-0.0134505
110.972	0.00133109	0.0201321	0.921316	0.690797	-0.0136104
111.472	0.00160095	0.0241541	0.913824	0.692388	-0.0134917
111.972	0.00264624	0.0262734	0.906876	0.694858	-0.0135904
112.472	0.00372455	0.0261613	0.900395	0.698492	-0.01354
112.972	0.00505012	0.0237858	0.894578	0.702333	-0.0135918
113.472	0.00768329	0.0197178	0.890022	0.707051	-0.0138814
113.972	0.0113637	0.0148799	0.887953	0.710485	-0.0135282
114.471	0.0182305	0.0114865	0.887517	0.711913	-0.0141568
114.971	0.0296783	0.00953396	0.888087	0.712103	-0.014404
115.471	0.0474243	0.00788673	0.889827	0.710725	-0.0142283
115.971	0.0749287	0.00692055	0.892477	0.708826	-0.014246
116.471	0.113284	0.00557589	0.895481	0.706437	-0.0147224
116.971	0.166003	0.00449655	0.898774	0.703998	-0.0143951
117.471	0.234493	0.00345903	0.902574	0.701711	-0.0146214
117.971	0.316433	0.00322572	0.907273	0.698994	-0.0145423
118.47	0.403887	0.00291486	0.912034	0.696115	-0.0146498
118.97	0.495476	0.00260486	0.917544	0.692861	-0.0144492
119.47	0.591891	0.00201014	0.923533	0.689038	-0.0148222
119.97	0.6908	0.0017373	0.930099	0.685889	-0.0142756
120.47	0.790296	0.00140925	0.938329	0.682199	-0.0145579
120.97	0.891243	0.00138886	0.947501	0.679516	-0.0148268
121.47	0.990863	0.00103801	0.956894	0.677547	-0.0146856
121.97	1.08837	0.000838679	0.965471	0.676955	-0.0149977
122.469	1.18126	0.000417107	0.974211	0.676092	-0.0148841
122.969	1.2682	0.000402723	0.982531	0.676376	-0.0146925
123.469	1.34536	0.000181777	0.990998	0.676717	-0.014918
123.969	1.4141	0	0.999368	0.677584	-0.0149187
124.469	1.47293	-0.000258624	1.00794	0.67854	-0.0145261
124.969	1.52007	-0.000207888	1.01631	0.680235	-0.0142197
125.469	1.555	-0.000215128	1.02565	0.681288	-0.0137543
125.969	1.57823	-0.000165486	1.0353	0.682309	-0.013139
126.468	1.58872	-0.000192988	1.04595	0.682102	-0.0125285
126.968	1.58695	-0.000182453	1.05749	0.681428	-0.0120922
127.468	1.57435	-0.000264274	1.06988	0.681577	-0.0118736
127.968	1.54829	-0.000443533	1.08285	0.682532	-0.0119013
128.468	1.51193	-0.000340052	1.09578	0.68438	-0.0116808
128.968	1.46412	-0.000450391	1.10699	0.687048	-0.0119598
129.468	1.40695	-0.000406323	1.11474	0.690664	-0.0117341
129.968	1.34145	-0.000454166	1.11625	0.694795	-0.0117315
130.467	1.26883	-0.000468975	1.11086	0.699453	-0.0118307
130.967	1.19061	-0.000694275	1.09945	0.704367	-0.0118953
131.467	1.1078	-0.000616462	1.08322	0.709875	-0.0117848
131.967	1.02333	-0.00059099	1.06645	0.715556	-0.0118696
132.467	0.938638	-0.000364234	1.04918	0.720206	-0.0116526
132.967	0.855953	-0.000184627	1.0298	0.725508	-0.0116349
133.467	0.779247	-6.09808e-05	1.00737	0.731543	-0.01158
133.967	0.709388	0.000129745	0.981917	0.737534	-0.0117383
134.466	0.647499	0.000139102	0.955039	0.742846	-0.0118532
134.966	0.594625	0.000347588	0.926174	0.747053	-0.0119034
135.466	0.54988	0.00064437	0.898239	0.750137	-0.0116191
135.966	0.510647	0.000906247	0.874226	0.752055	-0.0116206
136.466	0.476832	0.00125916	0.856408	0.752143	-0.0114188
136.966	0.448287	0.00158454	0.843879	0.751531	-0.0111394
137.466	0.424698	0.00189278	0.836101	0.752042	-0.0110489
137.966	0.405224	0.00233362	0.832171	0.753298	-0.0109127
138.465	0.38839	0.00281809	0.830509	0.756983	-0.0111104
138.965	0.373917	0.00326106	0.827124	0.760788	-0.0110127
139.465	0.361802	0.00434478	0.820614	0.765006	-0.0109768
139.965	0.350686	0.00576337	0.812999	0.76982	-0.0107502
140.465	0.341999	0.00720253	0.807015	0.775354	-0.0105821
140.965	0.334112	0.00876562	0.803263	0.780464	-0.0104816
141.465	0.327393	0.0110292	0.800841	0.786691	-0.0105785
141.965	0.321907	0.014068	0.798652	0.793276	-0.0104927
142.464	0.316994	0.0185985	0.795226	0.803647	-0.0103368
142.964	0.313389	0.0248823	0.790211	0.82027	-0.0101114
143.464	0.310855	0.0338461	0.783512	0.840103	-0.00994819
143.964	0.308997	0.0465695	0.776104	0.86167	-0.00985607
144.464	0.30779	0.0642051	0.76816	0.881859	-0.0100899
144.964	0.307488	0.0868559	0.761623	0.896752	-0.00976431
145.464	0.307276	0.115333	0.756525	0.906392	-0.00961504
145.964	0.307827	0.148942	0.753113	0.910006	-0.00953515
146.463	0.309278	0.18701	0.750088	0.90988	-0.00940798
146.963	0.312894	0.228014	0.74827	0.908899	-0.00936604
147.463	0.319238	0.27111	0.748432	0.907452	-0.00929248
147.963	0.329631	0.314334	0.750895	0.908575	-0.00931468
148.463	0.345358	0.35655	0.754885	0.912919	-0.00930597
148.963	0.367899	0.397693	0.761834	0.918111	-0.00963388
149.463	0.39873	0.436573	0.771693	0.92387	-0.00953111
149.963	0.437964	0.472624	0.784881	0.930806	-0.00921943
150.462	0.484763	0.505346	0.802563	0.938714	-0.00933108
150.962	0.535889	0.534958	0.825481	0.945334	-0.00900056
151.462	0.588407	0.560656	0.854236	0.951601	-0.00897577
151.962	0.640565	0.582866	0.889084	0.959662	-0.00889929
152.462	0.690147	0.601406	0.92962	0.969145	-0.00889758
152.962	0.738397	0.616495	0.975495	0.981005	-0.00872265
153.462	0.784357	0.628923	1.0263	0.995102	-0.00887909
153.962	0.828149	0.640108	1.08108	1.00957	-0.00874848
154.461	0.868962	0.649099	1.13985	1.02595	-0.00857434
154.961	0.906981	0.657229	1.20152	1.04229	-0.00861885
155.461	0.94147	0.665319	1.26553	1.05668	-0.00889226
155.961	0.971938	0.676441	1.33137	1.06869	-0.00901027
156.461	0.997765	0.693606	1.39927	1.07765	-0.00882692
156.961	1.0172	0.71801	1.46779	1.08183	-0.00883894
157.461	1.02906	0.747572	1.53707	1.08011	-0.00880474
157.961	1.03389	0.77855	1.60608	1.07191	-0.00884358
158.46	1.03053	0.807702	1.67556	1.05607	-0.00894574
158.96	1.01988	0.834201	1.74379	1.03543	-0.00896535
159.46	1.00271	0.857112	1.81011	1.00966	-0.00887684
159.96	0.979357	0.875729	1.8729	0.980975	-0.00841063
160.46	0.95135	0.888652	1.93145	0.954144	-0.00819285
160.96	0.91879	0.89523	1.98216	0.929193	-0.00774514
161.46	0.881268	0.895891	2.02122	0.906192	-0.00746056
161.96	0.837433	0.891522	2.04572	0.88649	-0.0072459
162.459	0.788023	0.882154	2.05414	0.867682	-0.00712339
162.959	0.735543	0.867289	2.04799	0.849004	-0.00698281
163.459	0.683288	0.846956	2.0289	0.831064	-0.00708303
163.959	0.629702	0.821321	1.99723	0.814046	-0.00717605
164.459	0.576928	0.791396	1.95766	0.798946	-0.00724837
164.959	0.527536	0.757818	1.91326	0.785375	-0.00716159
165.459	0.482967	0.722904	1.86986	0.775215	-0.00715907
165.959	0.445198	0.688875	1.82713	0.768035	-0.00724405
166.458	0.414446	0.659458	1.78808	0.762068	-0.00716291
166.958	0.389867	0.633186	1.75152	0.756032	-0.00728724
167.458	0.37092	0.606161	1.71536	0.746534	-0.00724166
167.958	0.353911	0.575395	1.68041	0.734531	-0.0072653
168.458	0.339888	0.540609	1.64707	0.721554	-0.00722669
168.958	0.327855	0.501186	1.61393	0.708502	-0.00736445
169.458	0.317495	0.458832	1.58034	0.697159	-0.00703658
169.958	0.307605	0.415658	1.54866	0.685312	-0.0072304
170.457	0.299525	0.374937	1.51775	0.673697	-0.00657139
170.957	0.291648	0.337885	1.48608	0.661848	-0.00655739
171.457	0.284621	0.304397	1.4556	0.650441	-0.00597276
171.957	0.278035	0.274586	1.42992	0.640939	-0.00620997
172.457	0.271517	0.24765	1.40964	0.63164	-0.00592424
172.957	0.26488	0.223147	1.3936	0.622642	-0.00585875
173.457	0.2589	0.201814	1.38066	0.614577	-0.00590512
173.957	0.253419	0.18497	1.37095	0.606721	-0.00606125
174.456	0.248796	0.170297	1.36502	0.600357	-0.00618841
174.956	0.245776	0.158682	1.36122	0.594893	-0.00626743
175.456	0.242424	0.150961	1.35827	0.590669	-0.00590701
175.956	0.239886	0.143187	1.35567	0.586839	-0.00598517
176.456	0.238086	0.137558	1.35473	0.584235	-0.00564508
176.956	0.236663	0.133975	1.35581	0.581887	-0.00614383
177.456	0.235597	0.129393	1.35812	0.578737	-0.00598857
177.956	0.235109	0.127283	1.3587	0.57584	-0.00589983
178.455	0.234648	0.124706	1.35681	0.572523	-0.00613633
178.955	0.234019	0.123546	1.35343	0.568831	-0.00594218
179.455	0.233797	0.123124	1.34809	0.564694	-0.00605476
179.955	0.233323	0.122204	1.34193	0.559815	-0.00572854
180.455	0.233065	0.121934	1.337	0.55395	-0.0058392
180.955	0.232639	0.12252	1.33456	0.547079	-0.00565275
181.455	0.232295	0.121498	1.33464	0.539817	-0.00592018
181.955	0.232052	0.122306	1.3357	0.532781	-0.00552084
182.454	0.232437	0.122199	1.33673	0.526909	-0.00582672
182.954	0.232464	0.122245	1.33792	0.522389	-0.0056034
183.454	0.232505	0.12271	1.33934	0.51921	-0.00583707
183.954	0.232711	0.122989	1.34054	0.516528	-0.00578036
184.454	0.233234	0.123474	1.34246	0.514193	-0.00591518
184.954	0.233708	0.124215	1.34429	0.512947	-0.00573477
185.454	0.234618	0.125136	1.34627	0.511799	-0.00585836
185.954	0.235562	0.126416	1.34823	0.511883	-0.00554342
186.453	0.236102	0.12799	1.35007	0.513485	-0.00554522
186.953	0.236434	0.129793	1.35025	0.515947	-0.00526176
187.453	0.236787	0.132273	1.34925	0.519136	-0.00558029
187.953	0.236911	0.134521	1.34712	0.522954	-0.00563501
188.453	0.236944	0.137791	1.34449	0.527067	-0.00590276
188.953	0.237298	0.141552	1.34031	0.53089	-0.00599348
189.453	0.237897	0.146608	1.33583	0.533986	-0.00563101
189.953	0.238264	0.152692	1.33139	0.535483	-0.00556276
190.452	0.238923	0.161154	1.32676	0.534773	-0.00555676
190.952	0.239655	0.172326	1.32182	0.531989	-0.00548521
191.452	0.240477	0.187928	1.31715	0.5272	-0.00546651
191.952	0.241526	0.20999	1.31263	0.52157	-0.00549599
192.452	0.242685	0.241119	1.30944	0.515216	-0.00518715
192.952	0.243828	0.28253	1.30725	0.508765	-0.00490781
193.452	0.245088	0.33664	1.30657	0.503943	-0.00454246
193.952	0.246243	0.403768	1.30673	0.500717	-0.00472668
194.451	0.247465	0.483307	1.30813	0.499164	-0.00458503
194.951	0.249091	0.571676	1.3105	0.498317	-0.00421653
195.451	0.251619	0.663434	1.31365	0.49843	-0.00374783
195.951	0.254078	0.755164	1.31764	0.498787	-0.00370459
196.451	0.257578	0.84521	1.32265	0.49834	-0.00310956
196.951	0.262053	0.931114	1.32789	0.497545	-0.00323014
197.451	0.267942	1.01133	1.33397	0.496795	-0.00309914
197.951	0.276186	1.08445	1.34133	0.495509	-0.00333931
198.45	0.289717	1.15012	1.35009	0.494867	-0.00307498
198.95	0.309187	1.20632	1.36037	0.493931	-0.00342287
199.45	0.337595	1.25137	1.37181	0.492718	-0.00351422
199.95	0.377164	1.28514	1.38488	0.49063	-0.00357609
200.45	0.43001	1.30807	1.39965	0.488092	-0.00347742
200.95	0.497566	1.32055	1.41671	0.485084	-0.00372158
201.45	0.579999	1.32416	1.43485	0.482623	-0.00356105
201.95	0.672219	1.32141	1.45331	0.47935	-0.0038637
202.449	0.769122	1.31538	1.47158	0.476268	-0.00413391
202.949	0.868215	1.30976	1.48888	0.473178	-0.00409547
203.449	0.967692	1.30801	1.50475	0.470007	-0.00372661
203.949	1.06634	1.3138	1.51975	0.466323	-0.00415966
204.449	1.1624	1.3294	1.5336	0.463109	-0.00389713
204.949	1.25455	1.35656	1.54822	0.460379	-0.00391159
205.449	1.34168	1.39305	1.56393	0.458742	-0.00371197
205.949	1.4221	1.43706	1.58205	0.457252	-0.00355064
206.448	1.49547	1.48469	1.60253	0.455765	-0.00332133
206.948	1.56069	1.53476	1.62688	0.454382	-0.00291837
207.448	1.61859	1.58742	1.65431	0.453221	-0.00324817
207.948	1.66894	1.64318	1.68444	0.451913	-0.00320447
208.448	1.70956	1.70327	1.716	0.450612	-0.00364439
208.948	1.74026	1.76934	1.74811	0.44926	-0.00342744
209.448	1.761	1.84086	1.77933	0.449079	-0.00352281
209.948	1.77011	1.91736	1.80909	0.449785	-0.0034275
210.447	1.76875	1.99688	1.83782	0.45052	-0.00349817
210.947	1.75977	2.07966	1.8653	0.451001	-0.00322024
211.447	1.74366	2.16383	1.89179	0.45134	-0.00320382
211.947	1.7217	2.24939	1.91852	0.452805	-0.00257057
212.447	1.69666	2.33581	1.94627	0.453651	-0.00269807
212.947	1.66863	2.42343	1.97582	0.455466	-0.00210669
213.447	1.63611	2.5105	2.01035	0.456983	-0.00191864
213.947	1.59931	2.59699	2.04998	0.458148	-0.00153983
214.446	1.5588	2.68225	2.09454	0.459077	-0.00110432
214.946	1.51776	2.7666	2.14361	0.460952	-0.00151036
215.446	1.47757	2.84837	2.19627	0.462617	-0.00113041
215.946	1.4419	2.92868	2.25271	0.464301	-0.00130494
216.446	1.41061	3.0065	2.3143	0.466823	-0.000777121
216.946	1.38186	3.08147	2.38162	0.470067	-0.000524247
217.446	1.35366	3.15279	2.45442	0.47444	-0.000434951
217.946	1.32609	3.21998	2.52973	0.48062	0
218.445	1.29936	3.28173	2.60529	0.487884	0.000166098
218.945	1.27682	3.33955	2.67809	0.496576	0.000563392
219.445	1.26108	3.39519	2.74393	0.507002	0.0010838
219.945	1.25383	3.44809	2.79786	0.518892	0.00148603
220.445	1.25254	3.50207	2.83815	0.531481	0.00178578
220.945	1.25763	3.55885	2.86451	0.544639	0.00227335
221.445	1.27021	3.61985	2.87849	0.558008	0.00325828
221.945	1.28835	3.68239	2.87981	0.571973	0.00416458
222.444	1.31081	3.74445	2.87026	0.585137	0.00540015
222.944	1.33663	3.80449	2.85968	0.595908	0.0068776
223.444	1.36512	3.86051	2.8564	0.604354	0.00861396
223.944	1.39538	3.91198	2.86111	0.61004	0.0104831
224.444	1.42375	3.95995	2.87206	0.611023	0.0124693
224.944	1.44708	4.00339	2.8884	0.608828	0.0146801
225.444	1.46444	4.04457	2.9078	0.603823	0.016598
225.944	1.47222	4.08324	2.92962	0.593771	0.0180886
226.443	1.46971	4.12012	2.95221	0.580055	0.0205708
226.943	1.45571	4.15762	2.97709	0.563964	0.022607
227.443	1.42957	4.19865	3.00518	0.551559	0.0256096
227.943	1.39178	4.2446	3.03592	0.536733	0.0282597
228.443	1.34479	4.29589	3.07116	0.520924	0.0313322
228.943	1.28987	4.35413	3.10658	0.510395	0.034756
229.443	1.23218	4.41824	3.13896	0.507285	0.0380666
229.943	1.17501	4.48499	3.16766	0.508301	0.0425573
230.442	1.12199	4.55503	3.18879	0.515306	0.0465197
230.942	1.07727	4.62954	3.20456	0.527833	0.0509654
231.442	1.04224	4.70917	3.21749	0.546605	0.0555766
231.942	1.01818	4.79354	3.23263	0.572428	0.0601442
232.442	1.00787	4.88175	3.25028	0.606924	0.0660907
232.942	1.0131	4.96981	3.27061	0.644135	0.0720563
233.442	1.03097	5.05541	3.29585	0.684572	0.0779636
233.942	1.0562	5.13836	3.32526	0.729073	0.084103
234.441	1.08699	5.22119	3.35744	0.780749	0.0896296
234.941	1.1205	5.3024	3.39446	0.840754	0.0949499
235.441	1.15572	5.38336	3.43681	0.912152	0.100273
235.941	1.19325	5.46611	3.48511	0.996018	0.105088
236.441	1.23162	5.54867	3.53864	1.09219	0.110176
236.941	1.27115	5.6299	3.59706	1.19929	0.115384
237.441	1.3109	5.70886	3.6605	1.3133	0.120463
237.941	1.35189	5.78397	3.72875	1.43191	0.126362
238.44	1.39391	5.85524	3.80063	1.5512	0.133237
238.94	1.43936	5.92332	3.87489	1.66984	0.140797
239.44	1.48651	5.98791	3.94805	1.78673	0.150353
239.94	1.53604	6.05261	4.0196	1.90358	0.161339
240.44	1.58786	6.11781	4.08676	2.02044	0.174175
240.94	1.64179	6.18269	4.14992	2.13697	0.191332
241.44	1.69736	6.24736	4.21038	2.24803	0.211649
241.94	1.75588	6.31253	4.26957	2.351	0.237615
242.439	1.81454	6.37688	4.33273	2.44287	0.269155
242.939	1.87208	6.43962	4.4021	2.52459	0.305496
243.439	1.92759	6.49845	4.47721	2.59638	0.348369
243.939	1.97977	6.55319	4.56024	2.66739	0.397557
244.439	2.02861	6.60473	4.65303	2.73428	0.452093
244.939	2.07379	6.65343	4.75446	2.79577	0.513851
245.439	2.11563	6.70023	4.86086	2.85458	0.583727
245.939	2.1552	6.74628	4.96614	2.91149	0.662174
246.438	2.19274	6.79037	5.06959	2.97335	0.749662
246.938	2.2274	6.83183	5.17381	3.03834	0.846053
247.438	2.26014	6.87091	5.27945	3.10694	0.952478
247.938	2.29287	6.90632	5.38282	3.18733	1.06868
248.438	2.32674	6.9383	5.48065	3.27439	1.19402
248.938	2.36163	6.96882	5.56799	3.37246	1.33012
249.438	2.39992	6.99838	5.64152	3.48179	1.47692
249.938	2.44211	7.02674	5.70503	3.59892	1.63191
250.437	2.48996	7.05416	5.76324	3.72142	1.79276
250.937	2.5452	7.08163	5.82035	3.85222	1.95575
251.437	2.60909	7.11067	5.8758	3.99102	2.11474
251.937	2.68288	7.14146	5.92943	4.13322	2.26312
252.437	2.76761	7.17627	5.97944	4.27379	2.39883
252.937	2.86005	7.21688	6.02657	4.41131	2.52149
253.437	2.95843	7.26302	6.07014	4.54604	2.63354
253.937	3.05932	7.31337	6.10577	4.68403	2.7402
254.436	3.16145	7.36809	6.14016	4.82671	2.8412
254.936	3.26094	7.423	6.17437	4.97211	2.93642
255.436	3.35876	7.47695	6.20414	5.12582	3.02336
255.936	3.455	7.53099	6.23103	5.27908	3.10178
256.436	3.55098	7.58559	6.25961	5.42805	3.17151
256.936	3.64625	7.6405	6.29084	5.57284	3.2322
257.436	3.74083	7.69572	6.32336	5.7158	3.28453
257.936	3.83361	7.75221	6.35689	5.85797	3.33086
258.435	3.92465	7.80773	6.39373	5.99529	3.37353
258.935	4.01197	7.86133	6.43495	6.12673	3.41133
259.435	4.09434	7.91215	6.48106	6.25374	3.44662
259.935	4.17073	7.96219	6.53048	6.37295	3.48345
260.435	4.24086	8.0115	6.58454	6.488	3.52037
260.935	4.30545	8.06073	6.63977	6.60155	3.55356
261.435	4.36758	8.11149	6.69636	6.71497	3.58433
261.935	4.42747	8.16337	6.75516	6.82508	3.61348
262.434	4.48774	8.21376	6.81788	6.93118	3.63907
262.934	4.54882	8.26373	6.88465	7.03272	3.66005
263.434	4.61047	8.31454	6.95344	7.13405	3.67543
263.934	4.67377	8.36809	7.02543	7.23193	3.69059
264.434	4.74191	8.42498	7.10045	7.32277	3.70928
264.934	4.81407	8.4822	7.1811	7.40837	3.74005
265.434	4.89029	8.54172	7.26964	7.48433	3.78493
265.934	4.9688	8.60449	7.36217	7.55217	3.84669
266.433	5.04913	8.67092	7.45633	7.61384	3.92153
266.933	5.12948	8.74064	7.55151	7.66936	4.0043
267.433	5.20823	8.81225	7.64678	7.71994	4.09142
267.933	5.28404	8.88668	7.74276	7.76632	4.18186
268.433	5.35627	8.96321	7.83956	7.81134	4.27134
268.933	5.42421	9.04133	7.93414	7.85379	4.35723
269.433	5.48813	9.11848	8.02883	7.89241	4.4384
269.933	5.55032	9.19748	8.12307	7.92558	4.51704
270.432	5.61287	9.27787	8.22042	7.9574	4.59279
270.932	5.67784	9.35751	8.32194	7.99175	4.66787
271.432	5.74535	9.43765	8.42612	8.03398	4.74981
271.932	5.81589	9.51803	8.53306	8.09417	4.83796
272.432	5.88678	9.59798	8.64151	8.15988	4.92652
272.932	5.96093	9.67461	8.75111	8.23315	5.01606
273.432	6.03855	9.74599	8.86051	8.3153	5.10562
273.932	6.11953	9.81391	8.96817	8.40022	5.19068
274.431	6.20375	9.87786	9.07517	8.48935	5.27181
274.931	6.2921	9.93995	9.18204	8.58233	5.34877
275.431	6.38819	10.0014	9.28865	8.67592	5.42173
275.931	6.49249	10.0612	9.39542	8.77205	5.49191
276.431	6.59852	10.1198	9.49774	8.86556	5.55833
276.931	6.70286	10.1789	9.59378	8.9578	5.62087
277.431	6.80516	10.2371	9.68509	9.04701	5.67978
277.931	6.90305	10.294	9.77116	9.13467	5.73829
278.43	6.99508	10.3496	9.8475	9.21774	5.79189
278.93	7.07835	10.4044	9.91479	9.2995	5.84672
279.43	7.15202	10.4621	9.97041	9.37559	5.90222
279.93	7.2158	10.5225	10.017	9.45099	5.95947
280.43	7.26978	10.5846	10.0584	9.52884	6.01991
280.93	7.31671	10.652	10.0956	9.60852	6.08209
281.43	7.35852	10.7291	10.1313	9.68776	6.14456
281.93	7.39657	10.8141	10.1665	9.76472	6.21119
282.429	7.4324	10.9018	10.1971	9.84345	6.28236
282.929	7.46688	10.9909	10.2231	9.92312	6.35472
283.429	7.50244	11.0807	10.2491	10.0069	6.42723
283.929	7.53963	11.1688	10.2803	10.0903	6.50328
284.429	7.5787	11.255	10.3176	10.1758	6.58105
284.929	7.62043	11.3379	10.3585	10.2647	6.66229
285.429	7.66779	11.4156	10.4026	10.35	6.74772
285.929	7.72189	11.4889	10.4483	10.4245	6.83966
286.428	7.78287	11.5598	10.4952	10.4905	6.94036
286.928	7.84899	11.6284	10.5446	10.5568	7.0415
287.428	7.91828	11.6969	10.5966	10.632	7.14256
287.928	7.99009	11.7654	10.6543	10.7176	7.24239
288.428	8.06355	11.8328	10.7185	10.8132	7.3378
288.928	8.13563	11.9002	10.7852	10.9063	7.42977
289.428	8.20576	11.9688	10.8509	10.9952	7.51834
289.928	8.27496	12.0381	10.9181	11.0773	7.60297
290.427	8.34322	12.1085	10.9857	11.1547	7.68415
290.927	8.41225	12.1792	11.0513	11.2238	7.75939
291.427	8.4804	12.2498	11.117	11.2874	7.82923
291.927	8.54791	12.3189	11.1845	11.3427	7.89321
292.427	8.6145	12.3861	11.2514	11.4003	7.95023
292.927	8.68392	12.4492	11.3159	11.4644	7.99959
293.427	8.75581	12.508	11.3825	11.5282	8.04023
293.927	8.83091	12.5606	11.4481	11.5903	8.07303
294.426	8.90921	12.6057	11.5157	11.659	8.10039
294.926	8.99053	12.642	11.587	11.7338	8.12907
295.426	9.07485	12.6711	11.6615	11.8167	8.16235
295.926	9.16122	12.6946	11.7391	11.9007	8.19738
296.426	9.24863	12.7132	11.8246	11.9875	8.23715
296.926	9.33651	12.7277	11.9166	12.0822	8.28229
297.426	9.42455	12.7407	12.015	12.1795	8.32953
297.926	9.5133	12.7531	12.1222	12.2787	8.37723
298.425	9.60271	12.7688	12.2344	12.3867	8.42473
298.925	9.69446	12.7881	12.3478	12.503	8.46988
299.425	9.78682	12.8119	12.4616	12.6184	8.50806
299.925	9.87982	12.8377	12.5755	12.7297	8.54656
300.425	9.97486	12.8676	12.6913	12.8353	8.58732
300.925	10.0723	12.9008	12.8071	12.9388	8.63011
301.425	10.1732	12.9346	12.9214	13.0405	8.67391
301.925	10.2744	12.971	13.0303	13.1331	8.72512
302.424	10.3725	13.0121	13.1285	13.2162	8.78408
302.924	10.4641	13.0587	13.2138	13.2984	8.84831
303.424	10.546	13.1098	13.286	13.3813	8.91959
303.924	10.6182	13.1643	13.3451	13.4661	8.99803
304.424	10.6813	13.2199	13.3945	13.5537	9.07799
304.924	10.7355	13.2761	13.4391	13.6418	9.15716
305.424	10.783	13.3329	13.4775	13.7305	9.23535
305.924	10.827	13.3921	13.5054	13.8164	9.30907
306.423	10.8712	13.4541	13.5277	13.8963	9.38038
306.923	10.9157	13.5213	13.547	13.977	9.45409
307.423	10.9608	13.5935	13.5628	14.0549	9.52763
307.923	11.0066	13.6714	13.5771	14.1297	9.60236
308.423	11.0532	13.7542	13.5867	14.1981	9.68488
308.923	11.1016	13.8388	13.5977	14.2596	9.77012
309.423	11.1513	13.9226	13.6081	14.3168	9.85307
309.923	11.2027	14.0047	13.6192	14.3737	9.92897
310.422	11.2589	14.0866	13.6317	14.437	10.0019
310.922	11.3199	14.169	13.6465	14.5084	10.0741
311.422	11.3902	14.2486	13.6679	14.5908	10.151
311.922	11.4716	14.3231	13.6997	14.6757	10.2301
312.422	11.5644	14.3937	13.7451	14.7565	10.3179
312.922	11.6732	14.4616	13.8032	14.8314	10.4119
313.422	11.7968	14.5262	13.8711	14.894	10.5045
313.922	11.9325	14.5861	13.9492	14.9468	10.5935
314.421	12.0806	14.6418	14.0348	14.993	10.6821
314.921	12.24	14.6914	14.1257	15.0278	10.7717
315.421	12.4109	14.7339	14.2162	15.0582	10.8639
315.921	12.5915	14.7698	14.3059	15.0856	10.9609
316.421	12.7801	14.8004	14.3982	15.1025	11.06
316.921	12.9755	14.826	14.494	15.1179	11.1583
317.421	13.1799	14.8494	14.5879	15.1304	11.2561
317.921	13.3932	14.8747	14.683	15.1389	11.3516
318.42	13.6141	14.9022	14.7784	15.1566	11.4399
318.92	13.8409	14.9292	14.8754	15.1788	11.5227
319.42	14.0759	14.9571	14.9715	15.2005	11.5987
319.92	14.3169	14.9859	15.0671	15.2214	11.6648
320.42	14.5628	15.0147	15.1599	15.242	11.7213
320.92	14.8145	15.0417	15.2494	15.2581	11.7643
321.42	15.0732	15.0687	15.3353	15.2758	11.7941
321.92	15.336	15.0931	15.418	15.2953	11.8143
322.419	15.602	15.116	15.4989	15.3173	11.8284
322.919	15.8686	15.1396	15.5758	15.3516	11.8344
323.419	16.1343	15.1635	15.6488	15.4003	11.8335
323.919	16.4	15.1864	15.7186	15.4675	11.8273
324.419	16.6646	15.2083	15.7872	15.5366	11.8221
324.919	16.9297	15.2302	15.8529	15.6028	11.819
325.419	17.1952	15.2513	15.9147	15.6653	11.8224
325.919	17.4607	15.2752	15.9763	15.7241	11.8315
326.418	17.7283	15.3012	16.0378	15.7854	11.8431
326.918	17.9987	15.3305	16.0978	15.8474	11.863
327.418	18.2698	15.3621	16.1529	15.9032	11.8898
327.918	18.5387	15.3974	16.2052	15.9598	11.9247
328.418	18.805	15.4353	16.2577	16.0173	11.9661
328.918	19.0665	15.4722	16.3132	16.07	12.0158
329.418	19.3283	15.5083	16.3729	16.1259	12.0744
329.918	19.5931	15.5431	16.4368	16.1811	12.1406
330.417	19.8594	15.5766	16.503	16.2374	12.2112
330.917	20.1242	15.6086	16.5691	16.2921	12.2878
331.417	20.3821	15.6407	16.6302	16.338	12.3671
331.917	20.6346	15.6703	16.6865	16.3799	12.4435
332.417	20.8789	15.6996	16.7394	16.4245	12.5181
332.917	21.1156	15.731	16.7879	16.4706	12.5887
333.417	21.3461	15.7631	16.8328	16.5126	12.6562
333.917	21.5676	15.7939	16.8751	16.5576	12.7258
334.416	21.7862	15.8209	16.9176	16.6092	12.8011
334.916	21.9973	15.8427	16.9629	16.6716	12.8756
335.416	22.2032	15.8597	17.0092	16.7425	12.9522
335.916	22.4023	15.8703	17.056	16.8076	13.0302
336.416	22.5937	15.8751	17.1009	16.8637	13.1052
336.916	22.7776	15.8762	17.1413	16.9166	13.1711
337.416	22.9545	15.8728	17.1778	16.9691	13.2317
337.916	23.1248	15.8653	17.2104	17.0283	13.2876
338.415	23.2905	15.8557	17.2407	17.0925	13.3356
338.915	23.4543	15.847	17.2706	17.1628	13.3773
339.415	23.6179	15.8422	17.3009	17.246	13.4119
339.915	23.7801	15.8467	17.3333	17.3362	13.4454
340.415	23.9392	15.8603	17.369	17.4261	13.4763
340.915	24.0936	15.8822	17.4091	17.5126	13.5096
341.415	24.2416	15.9079	17.4567	17.5959	13.5527
341.915	24.3827	15.9381	17.5147	17.6823	13.6027
342.414	24.5161	15.9708	17.5837	17.7744	13.659
342.914	24.6424	16.0028	17.662	17.865	13.721
343.414	24.7601	16.032	17.745	17.9537	13.7861
343.914	24.8731	16.0583	17.8312	18.0403	13.855
344.414	24.9763	16.0817	17.9223	18.1245	13.9291
344.914	25.0759	16.1021	18.0173	18.2086	14.0114
345.414	25.1717	16.1216	18.1142	18.2873	14.0954
345.914	25.2626	16.1389	18.2111	18.3632	14.18
346.413	25.3485	16.1546	18.3069	18.4391	14.2622
346.913	25.4288	16.1685	18.4037	18.5106	14.3404
347.413	25.5048	16.1831	18.5003	18.5825	14.4166
347.913	25.5759	16.1983	18.5971	18.6525	14.4896
348.413	25.64	16.2128	18.6927	18.7219	14.5588
348.913	25.6987	16.2258	18.7874	18.7914	14.6216
349.413	25.7518	16.2391	18.8812	18.866	14.6779
349.913	25.8007	16.2529	18.9759	18.9449	14.7292
350.412	25.8454	16.2691	19.0704	19.02	14.7806
350.912	25.8863	16.2864	19.1586	19.1006	14.8369
351.412	25.9209	16.3057	19.2373	19.1958	14.8991
351.912	25.9478	16.3228	19.3034	19.2941	14.9724
352.412	25.9681	16.3366	19.3554	19.3924	15.0589
352.912	25.9788	16.3486	19.3993	19.4886	15.1637
353.412	25.9797	16.3588	19.4393	19.5819	15.2758
353.912	25.9718	16.3699	19.4734	19.6747	15.3932
354.411	25.9548	16.3798	19.5037	19.7642	15.5083
354.911	25.9293	16.3875	19.5317	19.8446	15.6225
355.411	25.8945	16.3945	19.5602	19.9218	15.7324
355.911	25.8514	16.4041	19.5869	19.9924	15.8314
356.411	25.8021	16.4151	19.6128	20.0515	15.9162
356.911	25.7473	16.4246	19.6409	20.1047	15.9861
357.411	25.6884	16.4331	19.6705	20.155	16.0428
357.911	25.6274	16.4419	19.7084	20.2004	16.0875
358.41	25.561	16.451	19.7564	20.2369	16.1259
358.91	25.4911	16.4583	19.8053	20.2671	16.157
359.41	25.4196	16.4617	19.8537	20.2938	16.1811
359.91	25.3446	16.4617	19.9019	20.3175	16.2001
360.41	25.2713	16.4581	19.9469	20.3373	16.2138
360.91	25.1919	16.4505	19.9882	20.3558	16.2272
361.41	25.1068	16.4398	20.0257	20.3771	16.2329
361.91	25.0193	16.4284	20.0618	20.4023	16.2307
362.409	24.9307	16.4172	20.0962	20.4325	16.2256
362.909	24.8379	16.4072	20.1271	20.4616	16.2221
363.409	24.7417	16.3993	20.1568	20.4887	16.2174
363.909	24.6449	16.3926	20.185	20.5132	16.2153
364.409	24.5484	16.3859	20.2085	20.5369	16.2144
364.909	24.4555	16.3804	20.2291	20.566	16.216
365.409	24.3612	16.379	20.2503	20.5972	16.2148
365.909	24.2682	16.3842	20.2709	20.627	16.2106
366.408	24.18	16.3935	20.2941	20.6585	16.2069
366.908	24.0939	16.4051	20.3172	20.6919	16.2014
367.408	24.0064	16.4216	20.3363	20.7211	16.1951
367.908	23.9144	16.4391	20.3534	20.7447	16.1851
368.408	23.8197	16.4569	20.372	20.7604	16.1676
368.908	23.721	16.4741	20.394	20.7699	16.1457
369.408	23.6161	16.4899	20.4146	20.7671	16.1214
369.908	23.5099	16.5086	20.4322	20.7536	16.1012
370.407	23.395	16.5333	20.4494	20.734	16.0831
370.907	23.2768	16.5617	20.4672	20.7112	16.0671
371.407	23.1577	16.5959	20.4848	20.692	16.0522
371.907	23.0417	16.6323	20.5044	20.6791	16.0321
372.407	22.925	16.6693	20.5352	20.6694	16.0052
372.907	22.8028	16.7059	20.5739	20.6589	15.9726
373.407	22.6751	16.7427	20.6193	20.6425	15.9347
373.907	22.5396	16.7812	20.6644	20.6251	15.8931
374.406	22.3931	16.8222	20.7107	20.6158	15.8513
374.906	22.2395	16.8647	20.7534	20.6025	15.8139
375.406	22.0837	16.9079	20.7909	20.5829	15.7792
375.906	21.9301	16.9496	20.8234	20.5592	15.7451
376.406	21.7804	16.9892	20.8554	20.5242	15.7239
376.906	21.6357	17.0268	20.8868	20.4849	15.7116
377.406	21.4963	17.0632	20.9173	20.4413	15.7072
377.906	21.3629	17.0999	20.9458	20.3911	15.709
378.405	21.2354	17.1371	20.9748	20.3403	15.7122
378.905	21.1187	17.1729	21.0102	20.2977	15.7171
379.405	21.011	17.2076	21.05	20.2723	15.7241
379.905	20.9166	17.2423	21.089	20.2508	15.7338
380.405	20.8322	17.2797	21.1266	20.2355	15.741
380.905	20.7563	17.3189	21.1663	20.2285	15.745
381.405	20.6848	17.3561	21.21	20.2312	15.7514
381.905	20.6138	17.39	21.2571	20.2384	15.7636
382.404	20.5459	17.4214	21.3049	20.244	15.7844
382.904	20.4748	17.4483	21.3541	20.2527	15.8136
383.404	20.4009	17.4704	21.4006	20.265	15.8517
383.904	20.3268	17.4856	21.4453	20.2836	15.8956
384.404	20.2531	17.4939	21.4837	20.3001	15.9423
384.904	20.1852	17.495	21.5163	20.3133	15.9884
385.404	20.1267	17.4878	21.5404	20.3207	16.0326
385.904	20.0758	17.4761	21.553	20.3221	16.0725
386.403	20.0318	17.4652	21.5525	20.3251	16.1071
386.903	19.9966	17.4513	21.5413	20.3298	16.1377
387.403	19.9648	17.4355	21.516	20.3285	16.1651
387.903	19.9272	17.4184	21.4858	20.3277	16.1905
388.403	19.8849	17.3992	21.4557	20.3293	16.2108
388.903	19.8387	17.3811	21.4227	20.328	16.2326
389.403	19.787	17.3652	21.3873	20.3267	16.2517
389.903	19.7342	17.3523	21.3541	20.323	16.2684
390.402	19.6795	17.3445	21.331	20.3185	16.2829
390.902	19.6232	17.3432	21.3166	20.3145	16.2956
391.402	19.5682	17.3464	21.3108	20.3117	16.3073
391.902	19.5153	17.3532	21.312	20.3088	16.3159
392.402	19.4673	17.3603	21.3211	20.3101	16.3161
392.902	19.4244	17.3647	21.3343	20.3133	16.3116
393.402	19.3851	17.3653	21.352	20.3189	16.3088
393.902	19.3487	17.364	21.3743	20.3298	16.3001
394.401	19.3163	17.3592	21.4005	20.3488	16.2864
394.901	19.2864	17.351	21.4277	20.3795	16.274
395.401	19.259	17.3384	21.4561	20.4173	16.2589
395.901	19.2342	17.3212	21.4873	20.4577	16.2459
396.401	19.2122	17.2987	21.5223	20.4955	16.2386
396.901	19.1917	17.2724	21.5621	20.5306	16.2351
397.401	19.1689	17.2427	21.6052	20.5625	16.2326
397.901	19.1457	17.212	21.6496	20.5907	16.2319
398.4	19.1243	17.1797	21.6914	20.6174	16.2322
398.9	19.1066	17.1527	21.7322	20.6506	16.2335
399.4	19.0876	17.1269	21.7706	20.6761	16.2379
399.9	19.0695	17.0987	21.8066	20.6959	16.2425
400.4	19.0486	17.0676	21.8391	20.7149	16.2446
400.9	19.0253	17.0344	21.8672	20.7329	16.246
401.4	19.0022	17.0031	21.8881	20.7456	16.2457
401.9	18.9793	16.9748	21.8995	20.7566	16.2445
402.399	18.959	16.9504	21.9041	20.7623	16.2436
402.899	18.9402	16.9359	21.9054	20.7657	16.2457
403.399	18.9218	16.928	21.8973	20.7718	16.2486
403.899	18.9014	16.9234	21.8767	20.7734	16.2535
404.399	18.8787	16.9192	21.8449	20.7686	16.2636
404.899	18.8502	16.9137	21.8017	20.7658	16.2758
405.399	18.8216	16.9086	21.7552	20.768	16.2852
405.899	18.7931	16.9039	21.7119	20.7748	16.2982
406.398	18.7712	16.8994	21.6713	20.7781	16.3154
406.898	18.7527	16.8942	21.6325	20.7839	16.3299
407.398	18.7399	16.8902	21.5982	20.7929	16.3421
407.898	18.7269	16.8876	21.5728	20.7996	16.3549
408.398	18.7146	16.8852	21.5532	20.8017	16.3632
408.898	18.6996	16.8857	21.5376	20.8016	16.3633
409.398	18.6878	16.8879	21.5308	20.8	16.3568
409.898	18.6786	16.8875	21.5323	20.7991	16.3466
410.397	18.6743	16.886	21.5405	20.8031	16.3365
410.897	18.6725	16.8824	21.5592	20.8143	16.3245
411.397	18.6752	16.8773	21.5811	20.8243	16.3098
411.897	18.6838	16.8712	21.6074	20.8387	16.2922
412.397	18.6999	16.8655	21.6379	20.8612	16.274
412.897	18.7241	16.8631	21.6715	20.8882	16.2547
413.397	18.7528	16.8634	21.7084	20.915	16.2365
413.897	18.7837	16.8679	21.7506	20.9435	16.2189
414.396	18.8152	16.8754	21.7952	20.97	16.2014
414.896	18.8483	16.8877	21.842	20.9958	16.185
415.396	18.8819	16.9033	21.8926	21.0228	16.1737
415.896	18.9141	16.9232	21.9487	21.0511	16.1639
416.396	18.9445	16.9489	22.0125	21.0804	16.1629
416.896	18.9728	16.9793	22.0805	21.1107	16.1684
417.396	18.9992	17.0101	22.1543	21.1412	16.1797
417.896	19.0216	17.0393	22.2312	21.1696	16.1954
418.395	19.0399	17.0661	22.3105	21.1993	16.2084
418.895	19.0513	17.0888	22.3923	21.2249	16.2206
419.395	19.0589	17.1055	22.4764	21.2507	16.2297
419.895	19.0608	17.1172	22.5635	21.2813	16.2363
420.395	19.0592	17.1231	22.6501	21.3076	16.2394
420.895	19.0565	17.1232	22.7326	21.3281	16.2387
421.395	19.0561	17.1188	22.8112	21.3447	16.2362
421.895	19.0592	17.1115	22.8881	21.3556	16.2285
422.394	19.0631	17.1024	22.9677	21.3637	16.216
422.894	19.0649	17.0918	23.0476	21.3656	16.2056
423.394	19.0639	17.0797	23.1254	21.3698	16.1994
423.894	19.0588	17.0713	23.1978	21.3855	16.1963
424.394	19.0492	17.0627	23.2594	21.4049	16.1989
424.894	19.0337	17.0556	23.3116	21.4248	16.2032
425.394	19.0111	17.0537	23.3572	21.4432	16.2111
425.894	18.9821	17.0572	23.3927	21.4578	16.2227
426.393	18.9461	17.0694	23.4185	21.4676	16.235
426.893	18.9078	17.0872	23.4356	21.473	16.2491
427.393	18.8662	17.1089	23.4552	21.4723	16.2661
427.893	18.8226	17.1332	23.4737	21.4689	16.287
428.393	18.7779	17.159	23.4942	21.4676	16.3087
428.893	18.7314	17.1845	23.5143	21.4661	16.332
429.393	18.688	17.2092	23.5311	21.4725	16.3498
429.893	18.6497	17.233	23.5424	21.4864	16.3682
430.392	18.619	17.2559	23.5489	21.5016	16.3877
430.892	18.5949	17.2775	23.5529	21.5257	16.4036
431.392	18.5757	17.2993	23.5629	21.559	16.4164
431.892	18.5599	17.323	23.5865	21.603	16.4275
432.392	18.5509	17.3437	23.6169	21.6561	16.4419
432.892	18.5513	17.36	23.6528	21.7146	16.4579
433.392	18.5609	17.3721	23.6934	21.7828	16.471
433.892	18.5788	17.3811	23.7362	21.8604	16.4767
434.391	18.6019	17.3872	23.7814	21.9446	16.4716
434.891	18.6287	17.3911	23.8296	22.0274	16.4581
435.391	18.6581	17.3908	23.8794	22.1161	16.4421
435.891	18.6875	17.3859	23.9277	22.2104	16.4274
436.391	18.7174	17.3793	23.9734	22.3128	16.4176
436.891	18.7437	17.3708	24.0171	22.4241	16.4109
437.391	18.7657	17.36	24.0599	22.5365	16.407
437.891	18.7829	17.3484	24.1052	22.6493	16.3975
438.39	18.7992	17.3368	24.1553	22.7571	16.3846
438.89	18.8119	17.3251	24.2087	22.8605	16.37
439.39	18.8203	17.3109	24.2679	22.9578	16.3583
439.89	18.8245	17.2944	24.3302	23.0435	16.349
440.39	18.8294	17.2784	24.3932	23.1195	16.3435
440.89	18.8327	17.2611	24.4557	23.1873	16.3486
441.39	18.8393	17.242	24.5199	23.2526	16.3655
441.89	18.8486	17.2216	24.5868	23.3121	16.3869
442.389	18.8634	17.1998	24.6581	23.3682	16.4082
442.889	18.8811	17.1812	24.7361	23.4217	16.4242
443.389	18.901	17.1719	24.8233	23.4754	16.4306
443.889	18.9203	17.167	24.9213	23.5375	16.431
444.389	18.9402	17.1631	25.0308	23.6048	16.4287
444.889	18.9633	17.1629	25.148	23.677	16.4281
445.389	18.989	17.1672	25.2668	23.7535	16.4294
445.889	19.0163	17.1764	25.3842	23.833	16.4329
446.388	19.0441	17.1915	25.5012	23.9144	16.4427
446.888	19.072	17.2109	25.6284	23.9894	16.4525
447.388	19.0984	17.2303	25.7656	24.0606	16.4645
447.888	19.1264	17.2513	25.9082	24.1319	16.4804
448.388	19.1523	17.2754	26.056	24.2068	16.5011
448.888	19.1755	17.3008	26.2056	24.2923	16.5226
449.388	19.1946	17.3269	26.3574	24.3843	16.544
449.888	19.2098	17.3534	26.5104	24.483	16.5632
450.387	19.2202	17.3826	26.6587	24.5854	16.5842
450.887	19.2256	17.4195	26.798	24.6922	16.6109
451.387	19.2274	17.4653	26.929	24.8005	16.6382
451.887	19.2269	17.523	27.0427	24.911	16.6669
452.387	19.2216	17.5915	27.1482	25.0212	16.6972
452.887	19.2143	17.67	27.2426	25.1307	16.7279
453.387	19.2037	17.7563	27.3266	25.2345	16.7568
453.887	19.1921	17.8478	27.4045	25.3306	16.7836
454.386	19.1817	17.9417	27.4805	25.4176	16.8072
454.886	19.1739	18.0352	27.5579	25.4942	16.8217
455.386	19.1694	18.1273	27.6423	25.5621	16.8262
455.886	19.1675	18.2195	27.7339	25.6238	16.8238
456.386	19.1685	18.3125	27.8304	25.6785	16.8194
456.886	19.1717	18.4053	27.9291	25.725	16.8217
457.386	19.1764	18.4959	28.0307	25.7652	16.8268
457.886	19.1811	18.5828	28.1343	25.8025	16.8366
458.385	19.1851	18.6661	28.2415	25.8268	16.844
458.885	19.1919	18.7462	28.3528	25.8423	16.8465
459.385	19.2022	18.8206	28.4631	25.8588	16.8417
459.885	19.2145	18.8885	28.5688	25.8803	16.8378
460.385	19.2324	18.9502	28.6727	25.905	16.8384
460.885	19.256	19.0049	28.7781	25.9332	16.8407
461.385	19.2803	19.0527	28.8875	25.9624	16.841
461.885	19.301	19.0963	29.0002	25.9923	16.8465
462.384	19.3179	19.1341	29.1161	26.0188	16.8593
462.884	19.3318	19.1668	29.2349	26.0417	16.8756
463.384	19.3431	19.1951	29.3585	26.0602	16.8918
463.884	19.3549	19.2177	29.4813	26.0771	16.9116
464.384	19.3705	19.2353	29.6002	26.0893	16.931
464.884	19.3881	19.2485	29.7135	26.0987	16.9507
465.384	19.406	19.259	29.824	26.1035	16.9633
465.884	19.4235	19.2663	29.9343	26.1023	16.9643
466.383	19.4384	19.27	30.0469	26.0938	16.9556
466.883	19.4499	19.2684	30.1641	26.0775	16.9416
467.383	19.4602	19.2627	30.2856	26.0547	16.926
467.883	19.4707	19.2527	30.4098	26.0288	16.912
468.383	19.4851	19.2372	30.535	25.9962	16.9013
468.883	19.5042	19.2163	30.6591	25.9601	16.8942
469.383	19.5268	19.1927	30.7813	25.9218	16.8934
469.883	19.5548	19.1678	30.9031	25.8808	16.9005
470.382	19.5879	19.141	31.0269	25.8382	16.9127
470.882	19.622	19.1127	31.1521	25.7923	16.9275
471.382	19.6563	19.079	31.276	25.7464	16.9442
471.882	19.6886	19.0429	31.3988	25.7056	16.9644
472.382	19.7194	19.0068	31.5221	25.6701	16.989
472.882	19.7482	18.9687	31.6444	25.6346	17.0206
473.382	19.7757	18.9272	31.7649	25.6037	17.0593
473.882	19.8023	18.8796	31.8845	25.5834	17.1037
474.381	19.8311	18.8293	32.0021	25.5718	17.1573
474.881	19.8634	18.7749	32.1169	25.5716	17.2172
475.381	19.9003	18.7195	32.2293	25.5786	17.2779
475.881	19.9438	18.6585	32.3352	25.5881	17.3388
476.381	19.9898	18.5948	32.4311	25.5939	17.3946
476.881	20.0347	18.5312	32.5167	25.5975	17.4394
477.381	20.0775	18.467	32.5933	25.5968	17.4684
477.881	20.1156	18.4094	32.6593	25.5925	17.4869
478.38	20.1469	18.3594	32.7116	25.5914	17.4983
478.88	20.172	18.3187	32.7491	25.6	17.5111
479.38	20.1901	18.2897	32.7685	25.6235	17.5255
479.88	20.2031	18.2674	32.7736	25.6656	17.5366
480.38	20.2085	18.2559	32.7694	25.7271	17.5402
480.88	20.2088	18.2495	32.7668	25.8106	17.5403
481.38	20.2059	18.2487	32.7612	25.9204	17.5376
481.88	20.199	18.2542	32.7456	26.0438	17.5318
482.379	20.1864	18.2644	32.7224	26.1766	17.5233
482.879	20.1689	18.2768	32.6942	26.3238	17.5137
483.379	20.1458	18.2895	32.6597	26.4836	17.4985
483.879	20.1168	18.2996	32.6208	26.6612	17.4829
484.379	20.0816	18.3075	32.5816	26.852	17.4623
484.879	20.0434	18.3109	32.5379	27.0545	17.4333
485.379	20.0022	18.3092	32.4863	27.2754	17.3979
485.879	19.9621	18.3029	32.4292	27.5149	17.3548
486.378	19.9273	18.2941	32.3682	27.7684	17.3053
486.878	19.9009	18.283	32.3018	28.0345	17.2545
487.378	19.8841	18.2702	32.2294	28.3187	17.1974
487.878	19.8786	18.2576	32.1468	28.623	17.1376
488.378	19.8851	18.2417	32.0529	28.9383	17.0771
488.878	19.9007	18.223	31.9472	29.2621	17.0179
489.378	19.9214	18.201	31.8305	29.5888	16.9661
489.878	19.9418	18.1792	31.6978	29.9125	16.9275
490.377	19.9615	18.157	31.55	30.2272	16.8912
490.877	19.9776	18.1332	31.3929	30.5273	16.8663
491.377	19.9873	18.1074	31.2321	30.8089	16.8505
491.877	19.9921	18.0793	31.0758	31.0697	16.8445
492.377	19.9957	18.0465	30.9223	31.3087	16.8504
492.877	19.9954	18.0113	30.7724	31.5287	16.863
493.377	19.9918	17.9756	30.6241	31.7334	16.878
493.877	19.9876	17.9382	30.4742	31.9421	16.8961
494.376	19.9824	17.9005	30.3278	32.1539	16.9147
494.876	19.9747	17.8639	30.1743	32.3554	16.9329
495.376	19.9627	17.8325	30.013	32.5522	16.9533
495.876	19.9457	17.8059	29.8408	32.761	16.9783
496.376	19.9244	17.7865	29.6573	32.9932	17.0046
496.876	19.8988	17.7751	29.4652	33.2378	17.0396
497.376	19.8696	17.7701	29.271	33.4843	17.0756
497.876	19.8363	17.7731	29.0716	33.7371	17.1111
498.375	19.8033	17.7801	28.8708	33.9933	17.1465
498.875	19.7695	17.7887	28.6682	34.2487	17.178
499.375	19.7357	17.8021	28.4715	34.5016	17.211
499.875	19.7009	17.8187	28.2825	34.7465	17.2491
500.375	19.6632	17.8409	28.0933	34.9763	17.2891
500.875	19.6249	17.8681	27.9089	35.1849	17.3258
501.375	19.5889	17.8989	27.7219	35.3666	17.3605
501.875	19.5554	17.9329	27.5387	35.5181	17.3974
502.374	19.5226	17.9728	27.36	35.6322	17.4315
502.874	19.4955	18.0147	27.1966	35.7126	17.4647
503.374	19.4747	18.0582	27.0445	35.7791	17.5037
503.874	19.46	18.1037	26.9082	35.8342	17.5398
504.374	19.4534	18.1507	26.7835	35.8793	17.5688
504.874	19.4552	18.1984	26.6711	35.9158	17.5926
505.374	19.4695	18.2476	26.5734	35.9452	17.6152
505.874	19.4932	18.2997	26.4907	35.9687	17.6414
506.373	19.527	18.3515	26.4096	35.9874	17.6698
506.873	19.5728	18.4021	26.3232	36.0022	17.6984
507.373	19.628	18.4504	26.2288	36.0139	17.7276
507.873	19.6903	18.5001	26.128	36.0231	17.7493
508.373	19.7557	18.5508	26.0249	36.0302	17.7678
508.873	19.8282	18.6041	25.9225	36.0356	17.7818
509.373	19.9027	18.6575	25.8228	36.0396	17.7944
509.873	19.9802	18.7142	25.7239	36.0425	17.8074
510.372	20.0613	18.7704	25.629	36.0446	17.8227
510.872	20.1422	18.8233	25.5385	36.0459	17.8421
511.372	20.2189	18.8742	25.45	36.0466	17.8633
511.872	20.2898	18.9217	25.3613	36.0468	17.8841
512.372	20.3543	18.9654	25.2798	36.0466	17.9038
512.872	20.4115	19.0061	25.1979	36.0461	17.925
513.372	20.4615	19.043	25.1138	36.0453	17.9423
513.872	20.5038	19.0788	25.0296	36.0443	17.9492
514.371	20.5384	19.112	24.9528	36.0431	17.9472
514.871	20.5685	19.1461	24.8805	36.0418	17.9371
515.371	20.5941	19.1806	24.8194	36.0404	17.9209
515.871	20.6172	19.2175	24.7647	36.0389	17.9007
516.371	20.6373	19.2535	24.7241	36.0373	17.8776
516.871	20.6519	19.2891	24.6994	36.0357	17.8521
517.371	20.6621	19.3239	24.6941	36.034	17.8265
517.871	20.6712	19.358	24.7007	36.0323	17.8036
518.37	20.6771	19.3906	24.7213	36.0305	17.7804
518.87	20.6794	19.4237	24.7539	36.0287	17.7563
519.37	20.679	19.4572	24.795	36.0269	17.7364
519.87	20.6779	19.4924	24.8375	36.0251	17.7192
520.37	20.6774	19.5285	24.8837	36.0232	17.7089
520.87	20.6803	19.5648	24.9276	36.0214	17.6977
521.37	20.6857	19.5988	24.9761	36.0195	17.6866
521.87	20.6892	19.6291	25.0282	36.0176	17.6744
522.369	20.6918	19.6547	25.0875	36.0157	17.6589
522.869	20.6928	19.6736	25.1549	36.0139	17.6388
523.369	20.6941	19.6863	25.2254	36.012	17.6134
523.869	20.6935	19.6925	25.2996	36.0101	17.5845
524.369	20.6907	19.6914	25.3712	36.0082	17.5566
524.869	20.6857	19.6838	25.4384	36.0063	17.5327
525.369	20.6804	19.6701	25.4965	36.0044	17.5134
525.869	20.6733	19.6513	25.5441	36.0025	17.4949
526.368	20.6634	19.6269	25.5809	36.0006	17.4808
526.868	20.6509	19.5948	25.6141	35.9987	17.469
527.368	20.6373	19.5574	25.6432	35.9968	17.4627
527.868	20.6235	19.5177	25.6689	35.9949	17.4611
528.368	20.6083	19.4727	25.6911	35.9929	17.4544
528.868	20.5918	19.4241	25.7037	35.991	17.4434
529.368	20.5734	19.3738	25.7055	35.9891	17.4332
529.868	20.5524	19.3195	25.7042	35.9872	17.4211
530.367	20.5279	19.2581	25.7058	35.9853	17.407
530.867	20.4998	19.1927	25.7049	35.9834	17.3927
531.367	20.4705	19.1291	25.696	35.9815	17.3801
531.867	20.4427	19.068	25.6848	35.9796	17.3732
532.367	20.418	19.0095	25.6755	35.9777	17.3743
532.867	20.3959	18.9569	25.6665	35.9758	17.378
533.367	20.3781	18.9074	25.6613	35.9739	17.3814
533.867	20.3647	18.8609	25.6618	35.972	17.386
534.366	20.3577	18.8206	25.6674	35.9701	17.3909
534.866	20.358	18.7865	25.6735	35.9681	17.3946
535.366	20.3632	18.7565	25.6789	35.9662	17.3951
535.866	20.3737	18.7283	25.6851	35.9643	17.3952
536.366	20.3863	18.6976	25.6906	35.9624	17.3923
536.866	20.3983	18.662	25.695	35.9605	17.3829
537.366	20.4123	18.6196	25.6987	35.9586	17.3678
537.866	20.4275	18.5737	25.7032	35.9567	17.3462
538.365	20.4445	18.5286	25.7074	35.9548	17.3216
538.865	20.4617	18.4855	25.7133	35.9529	17.3035
539.365	20.4758	18.4471	25.7218	35.9509	17.2915
539.865	20.4862	18.4114	25.7284	35.949	17.2824
540.365	20.4927	18.3755	25.7337	35.947	17.2746
540.865	20.4973	18.3396	25.7381	35.9447	17.2688
541.365	20.5013	18.3045	25.7408	35.9421	17.2617
541.865	20.5046	18.2696	25.7385	35.9386	17.2515
542.364	20.5074	18.2334	25.7325	35.9334	17.2382
542.864	20.5083	18.1967	25.7253	35.9251	17.2226
543.364	20.509	18.1615	25.7232	35.9114	17.2026
543.864	20.5084	18.1313	25.7308	35.8893	17.1849
544.364	20.5025	18.1048	25.7468	35.8544	17.169
544.864	20.4923	18.0842	25.7762	35.8017	17.1553
545.364	20.4785	18.0707	25.8214	35.7257	17.1452
545.864	20.4616	18.064	25.8763	35.6211	17.1427
546.363	20.4461	18.0603	25.9411	35.4839	17.1468
546.863	20.4328	18.0564	26.0117	35.3166	17.1576
547.363	20.4197	18.0506	26.0908	35.1368	17.1736
547.863	20.4068	18.0414	26.1753	34.9458	17.1912
548.363	20.4022	18.0272	26.2693	34.7545	17.2076
548.863	20.4047	18.0097	26.3702	34.5718	17.2189
549.363	20.4108	17.9883	26.479	34.3984	17.2262
549.863	20.4199	17.9597	26.595	34.2345	17.233
550.362	20.4359	17.9226	26.7191	34.0771	17.2399
550.862	20.4574	17.875	26.8489	33.9189	17.2451
551.362	20.4812	17.8247	26.9837	33.7553	17.254
551.862	20.5078	17.7768	27.1214	33.5854	17.2711
552.362	20.5379	17.7346	27.2627	33.4007	17.2991
552.862	20.5712	17.7002	27.4073	33.2046	17.3374
553.362	20.6061	17.6731	27.5505	32.9978	17.3804
553.862	20.6421	17.6546	27.6896	32.7822	17.428
554.361	20.6779	17.6455	27.8218	32.5616	17.4792
554.861	20.7132	17.6409	27.9462	32.3473	17.5275
555.361	20.751	17.6413	28.0627	32.1471	17.5736
555.861	20.7904	17.6473	28.175	31.9661	17.611
556.361	20.8321	17.6587	28.2829	31.8003	17.6407
556.861	20.8749	17.6705	28.3882	31.6502	17.6662
557.361	20.9177	17.6815	28.4903	31.5137	17.6946
557.861	20.9596	17.6943	28.5894	31.3892	17.7206
558.36	20.9978	17.7065	28.685	31.2778	17.7441
558.86	21.0315	17.7164	28.7749	31.1785	17.7599
559.36	21.0598	17.724	28.8574	31.088	17.7763
559.86	21.081	17.7326	28.9348	30.9994	17.7979
560.36	21.0988	17.7425	29.0054	30.9132	17.8203
560.86	21.1116	17.7511	29.0666	30.8252	17.8404
561.36	21.1186	17.7589	29.1189	30.7445	17.8642
561.86	21.1185	17.7643	29.1616	30.6793	17.8871
562.359	21.1113	17.7673	29.1971	30.6239	17.9058
562.859	21.0966	17.7668	29.2256	30.5766	17.9206
563.359	21.0735	17.7634	29.2501	30.5382	17.9362
563.859	21.0457	17.7578	29.2699	30.5097	17.9469
564.359	21.0151	17.7505	29.2841	30.487	17.9536
564.859	20.9812	17.742	29.2909	30.47	17.954
565.359	20.944	17.7341	29.2904	30.4582	17.9527
565.859	20.9056	17.7307	29.2858	30.4518	17.9499
566.358	20.8687	17.7288	29.2779	30.4498	17.9401
566.858	20.8321	17.7271	29.2691	30.451	17.9244
567.358	20.7952	17.7307	29.2564	30.4529	17.9006
567.858	20.7594	17.7384	29.2426	30.458	17.8735
568.358	20.7253	17.7526	29.2269	30.4603	17.845
568.858	20.6932	17.7692	29.2074	30.4629	17.8165
569.358	20.6623	17.7867	29.1824	30.4573	17.7905
569.858	20.6306	17.8023	29.1503	30.4415	17.7691
570.357	20.6001	17.817	29.1107	30.4131	17.7578
570.857	20.5704	17.8315	29.0591	30.3761	17.7528
571.357	20.5437	17.8463	28.998	30.33	17.7557
571.857	20.5178	17.8612	28.9246	30.277	17.7594
572.357	20.4903	17.8725	28.8437	30.2191	17.7678
572.857	20.4606	17.8845	28.7625	30.1647	17.7783
573.357	20.4283	17.8961	28.685	30.1116	17.7861
573.857	20.394	17.9084	28.6052	30.0596	17.788
574.356	20.3574	17.9235	28.5212	30.0009	17.7876
574.856	20.3197	17.9384	28.4315	29.9319	17.7853
575.356	20.2843	17.9541	28.3382	29.8553	17.783
575.856	20.2504	17.9714	28.2475	29.7719	17.7809
576.356	20.2179	17.9931	28.1633	29.6805	17.7831
576.856	20.1899	18.0175	28.0821	29.5827	17.7894
577.356	20.1694	18.0417	28.0008	29.4827	17.7979
577.856	20.1541	18.0612	27.9211	29.3737	17.8081
578.355	20.141	18.0793	27.8384	29.2563	17.8136
578.855	20.1261	18.0935	27.7512	29.1323	17.815
579.355	20.1097	18.1027	27.6668	29.0091	17.8154
579.855	20.0936	18.1067	27.5771	28.9003	17.8092
580.355	20.0811	18.1041	27.4819	28.7988	17.7975
580.855	20.0693	18.0974	27.3776	28.7013	17.7787
581.355	20.0584	18.0867	27.2754	28.6081	17.7646
581.855	20.0508	18.0735	27.177	28.5165	17.7535
582.354	20.0478	18.0585	27.0835	28.4273	17.7496
582.854	20.0525	18.0401	26.9936	28.3375	17.7471
583.354	20.0677	18.0184	26.902	28.2469	17.757
583.854	20.0898	17.996	26.8081	28.1575	17.774
584.354	20.1208	17.9719	26.7203	28.062	17.8002
584.854	20.1591	17.9467	26.6344	27.954	17.8355
585.354	20.2068	17.9255	26.5473	27.8372	17.8765
585.854	20.261	17.9048	26.4655	27.7136	17.9171
586.353	20.3168	17.889	26.3953	27.5905	17.9625
586.853	20.3733	17.8758	26.3318	27.466	18.0053
587.353	20.428	17.8672	26.2681	27.3414	18.0475
587.853	20.4805	17.8624	26.2121	27.2124	18.088
588.353	20.5287	17.8616	26.1629	27.0761	18.1263
588.853	20.5698	17.8641	26.1202	26.934	18.1597
589.353	20.6029	17.8716	26.0854	26.7929	18.1901
589.853	20.6291	17.882	26.0564	26.6514	18.2152
590.352	20.6483	17.8966	26.0316	26.5162	18.2355
590.852	20.6632	17.9146	26.005	26.3874	18.2512
591.352	20.6743	17.9345	25.976	26.2672	18.2629
591.852	20.686	17.9546	25.9439	26.1542	18.2732
592.352	20.6946	17.9766	25.9019	26.0373	18.289
592.852	20.7053	18.0006	25.8541	25.9097	18.308
593.352	20.7184	18.0231	25.803	25.786	18.3308
593.852	20.7357	18.0461	25.749	25.6695	18.3574
594.351	20.759	18.0689	25.6964	25.5502	18.383
594.851	20.784	18.0923	25.6476	25.435	18.4064
595.351	20.8114	18.1164	25.6061	25.3226	18.4414
595.851	20.8378	18.1408	25.5625	25.2208	18.488
596.351	20.8593	18.1653	25.5175	25.1254	18.5507
596.851	20.8739	18.1889	25.4723	25.0329	18.6279
597.351	20.8822	18.2101	25.4333	24.9423	18.712
597.851	20.8834	18.226	25.3968	24.8568	18.8103
598.35	20.8782	18.237	25.3571	24.7741	18.9214
598.85	20.8687	18.2445	25.3211	24.6904	19.0395
599.35	20.8578	18.248	25.2812	24.6139	19.1632
599.85	20.846	18.2499	25.2341	24.5397	19.2941
600.35	20.8344	18.2497	25.179	24.4566	19.4295
600.85	20.821	18.2489	25.1204	24.3654	19.5703
601.35	20.8016	18.2477	25.0648	24.2653	19.7125
601.85	20.7742	18.2499	25.0028	24.1564	19.8545
602.349	20.7356	18.252	24.9406	24.0516	19.995
602.849	20.6845	18.2529	24.8755	23.9583	20.1307
603.349	20.6224	18.2506	24.8106	23.8635	20.259
603.849	20.5499	18.2458	24.737	23.7695	20.3811
604.349	20.4697	18.2403	24.6562	23.6764	20.5022
604.849	20.3848	18.2341	24.5672	23.5867	20.6289
605.349	20.2969	18.2255	24.4789	23.4968	20.7622
605.849	20.2116	18.2153	24.3974	23.4089	20.9035
606.348	20.1346	18.2088	24.3273	23.3272	21.0449
606.848	20.0691	18.2088	24.262	23.2511	21.1903
607.348	20.0162	18.2149	24.2018	23.1787	21.342
607.848	19.9735	18.2254	24.1483	23.1137	21.5016
608.348	19.9436	18.2422	24.1013	23.0589	21.669
608.848	19.927	18.2603	24.0606	23.0127	21.843
609.348	19.9188	18.2803	24.026	22.978	22.0157
609.848	19.9193	18.3029	23.9878	22.9563	22.1824
610.347	19.9308	18.3261	23.9489	22.951	22.3409
610.847	19.944	18.3478	23.9084	22.9581	22.4859
611.347	19.9634	18.3687	23.8646	22.9656	22.6103
611.847	19.9862	18.3886	23.817	22.9759	22.7169
612.347	20.0135	18.4082	23.766	22.9878	22.7994
612.847	20.0445	18.4282	23.7113	23.0027	22.8628
613.347	20.0802	18.4474	23.6467	23.0175	22.9178
613.847	20.1221	18.4622	23.5762	23.0305	22.9723
614.346	20.1635	18.4717	23.5089	23.0441	23.0245
614.846	20.2009	18.4757	23.4396	23.0588	23.0711
615.346	20.2338	18.4776	23.3703	23.0783	23.1068
615.846	20.2578	18.4773	23.2983	23.1011	23.1256
616.346	20.2739	18.4734	23.2286	23.1223	23.1237
616.846	20.2829	18.4644	23.1552	23.1432	23.1063
617.346	20.2843	18.4521	23.0853	23.1641	23.0785
617.846	20.2805	18.4362	23.0211	23.1846	23.0422
618.345	20.2747	18.4158	22.9648	23.1956	22.9965
618.845	20.2684	18.3929	22.9126	23.196	22.945
619.345	20.261	18.3699	22.8631	23.185	22.8846
619.845	20.2509	18.3493	22.8155	23.1647	22.8182
620.345	20.2371	18.3289	22.7746	23.1357	22.7482
620.845	20.2215	18.3045	22.7435	23.0973	22.6755
621.345	20.2067	18.2804	22.7219	23.0578	22.6006
621.845	20.1919	18.2523	22.7045	23.0168	22.5132
622.344	20.1785	18.221	22.6901	22.975	22.4165
622.844	20.1645	18.1869	22.6792	22.925	22.3062
623.344	20.147	18.1498	22.6692	22.8701	22.186
623.844	20.1279	18.1118	22.6624	22.8149	22.0571
624.344	20.1104	18.0719	22.6511	22.7612	21.9203
624.844	20.0951	18.0316	22.6362	22.7132	21.7798
625.344	20.0813	17.9928	22.6196	22.6657	21.6367
625.844	20.0692	17.9622	22.6001	22.6295	21.4885
626.343	20.059	17.9352	22.584	22.609	21.3336
626.843	20.0504	17.9151	22.5652	22.5944	21.1744
627.343	20.0476	17.9008	22.5462	22.587	21.0116
627.843	20.0506	17.8927	22.5273	22.5862	20.8461
628.343	20.058	17.8937	22.5057	22.5945	20.6773
628.843	20.0698	17.8987	22.479	22.6004	20.5078
629.343	20.0874	17.9065	22.4527	22.6031	20.3387
629.843	20.1107	17.9162	22.4236	22.6011	20.1673
630.342	20.1372	17.9267	22.3876	22.5936	19.9882
630.842	20.162	17.9392	22.3516	22.5835	19.8144
631.342	20.1826	17.9553	22.3196	22.5755	19.6481
631.842	20.2013	17.9759	22.2939	22.5716	19.4925
632.342	20.2158	18.0029	22.2743	22.5752	19.349
632.842	20.2233	18.0358	22.2518	22.5853	19.2253
633.342	20.2247	18.0711	22.2305	22.5972	19.1105
633.842	20.222	18.1027	22.2105	22.6039	19.0076
634.341	20.218	18.1286	22.1924	22.6039	18.9174
634.841	20.2165	18.1475	22.1747	22.5956	18.8343
635.341	20.2147	18.1584	22.1606	22.5826	18.7653
635.841	20.2113	18.1638	22.15	22.5651	18.7122
636.341	20.2071	18.1671	22.1433	22.5384	18.6712
636.841	20.2051	18.1689	22.1384	22.503	18.6427
637.341	20.2041	18.1673	22.1374	22.463	18.6258
637.841	20.2008	18.1661	22.1377	22.4227	18.6187
638.34	20.1993	18.1642	22.1439	22.3833	18.6172
638.84	20.1996	18.1648	22.1552	22.345	18.6105
639.34	20.2001	18.1689	22.1751	22.3121	18.6033
639.84	20.1978	18.1757	22.2038	22.2755	18.5966
640.34	20.1942	18.1823	22.2353	22.2338	18.5882
640.84	20.1941	18.1872	22.2653	22.192	18.581
641.34	20.1956	18.1888	22.2907	22.1483	18.571
641.84	20.2025	18.1876	22.3082	22.1051	18.5553
642.339	20.2158	18.1882	22.3195	22.0605	18.538
642.839	20.2353	18.1867	22.3281	22.0153	18.5203
643.339	20.2563	18.1807	22.3294	21.9744	18.5067
643.839	20.2781	18.1699	22.3282	21.9439	18.4941
644.339	20.2979	18.1577	22.3222	21.92	18.4845
644.839	20.3158	18.1461	22.3087	21.9055	18.4756
645.339	20.3358	18.1377	22.2924	21.8967	18.4697
645.839	20.3548	18.1294	22.2777	21.8932	18.4664
646.338	20.3726	18.1214	22.2677	21.8961	18.4724
646.838	20.3916	18.1115	22.2525	21.9039	18.4754
647.338	20.4063	18.0972	22.2417	21.9232	18.4767
647.838	20.4189	18.0743	22.2339	21.9491	18.4741
648.338	20.4292	18.0427	22.229	21.9787	18.4704
648.838	20.4411	18.0059	22.2232	22.0072	18.461
649.338	20.4534	17.965	22.2175	22.0298	18.4483
649.838	20.4639	17.9248	22.2099	22.049	18.4395
650.337	20.4745	17.8905	22.2009	22.0595	18.4406
650.837	20.4816	17.8585	22.1941	22.0633	18.4463
651.337	20.4812	17.8294	22.1869	22.0593	18.4553
651.837	20.4773	17.8042	22.1794	22.0453	18.4674
652.337	20.4738	17.7833	22.1744	22.0235	18.4829
652.837	20.4699	17.7678	22.1736	21.9954	18.4996
653.337	20.4597	17.7577	22.1782	21.9668	18.5126
653.837	20.4453	17.7516	22.19	21.9384	18.5207
654.336	20.4331	17.7484	22.2125	21.9104	18.5245
654.836	20.4181	17.7444	22.2432	21.8881	18.522
655.336	20.3973	17.7433	22.2759	21.8731	18.5146
655.836	20.3772	17.747	22.3082	21.8631	18.5006
656.336	20.3616	17.7514	22.3356	21.8558	18.4825
656.836	20.3513	17.756	22.3568	21.8468	18.468
657.336	20.3379	17.7653	22.373	21.8381	18.4565
657.836	20.324	17.7795	22.3844	21.8228	18.4443
658.335	20.3102	17.7982	22.393	21.7984	18.4311
658.835	20.3023	17.8242	22.4024	21.7784	18.4165
659.335	20.3065	17.8571	22.4096	21.7646	18.4003
659.835	20.3186	17.8947	22.4189	21.7575	18.3825
660.335	20.3356	17.9314	22.4264	21.7519	18.3602
660.835	20.3542	17.9652	22.4331	21.7516	18.3348
661.335	20.3762	17.9966	22.4409	21.7624	18.3104
661.835	20.4019	18.0272	22.4458	21.7826	18.2936
662.334	20.4328	18.058	22.4502	21.8057	18.2849
662.834	20.4787	18.0893	22.452	21.8337	18.2782
663.334	20.5316	18.1191	22.4535	21.8674	18.2766
663.834	20.594	18.147	22.4624	21.9089	18.2828
664.334	20.6612	18.1707	22.4787	21.9568	18.2961
664.834	20.7244	18.1879	22.4988	22.0069	18.3164
665.334	20.7796	18.1963	22.5221	22.064	18.3447
665.834	20.826	18.1992	22.5433	22.1256	18.3778
666.333	20.8619	18.2008	22.5733	22.1927	18.416
666.833	20.8863	18.2035	22.6017	22.266	18.4595
667.333	20.9013	18.2076	22.63	22.3446	18.5071
667.833	20.9063	18.2154	22.6571	22.4207	18.5672
668.333	20.9048	18.2273	22.6815	22.4898	18.6357
668.833	20.8967	18.2462	22.6972	22.5525	18.7055
669.333	20.884	18.2731	22.7048	22.6091	18.7733
669.833	20.8748	18.3085	22.7043	22.6573	18.8395
670.332	20.8663	18.355	22.6904	22.7002	18.899
670.832	20.8523	18.4167	22.6673	22.7385	18.9503
671.332	20.834	18.4931	22.6336	22.7711	18.9932
671.832	20.8136	18.5772	22.5924	22.7971	19.0296
672.332	20.7915	18.6686	22.5511	22.8237	19.061
672.832	20.7654	18.7674	22.5117	22.8472	19.0869
673.332	20.7332	18.8787	22.4758	22.8657	19.1096
673.832	20.6976	19.0012	22.4441	22.8771	19.1232
674.331	20.6627	19.1342	22.4066	22.8902	19.1316
674.831	20.6316	19.276	22.3649	22.9075	19.1337
675.331	20.5997	19.4249	22.3198	22.922	19.1391
675.831	20.5575	19.5804	22.2808	22.934	19.1444
676.331	20.5123	19.7427	22.2401	22.9508	19.1501
676.831	20.4616	19.9101	22.2051	22.9708	19.1581
677.331	20.4088	20.0814	22.1713	22.9932	19.1661
677.831	20.3575	20.2547	22.1373	23.0109	19.1722
678.33	20.3059	20.4308	22.0998	23.0249	19.1734
678.83	20.26	20.6097	22.0579	23.0372	19.1693
679.33	20.2246	20.7898	22.0168	23.0458	19.1596
679.83	20.1986	20.9723	21.9789	23.0517	19.1383
680.33	20.1875	21.157	21.9368	23.0517	19.1128
680.83	20.1866	21.342	21.8984	23.052	19.0797
681.33	20.1948	21.5263	21.8681	23.0575	19.0377
681.83	20.2079	21.7105	21.8447	23.0686	18.9893
682.329	20.2231	21.8968	21.8292	23.0894	18.9377
682.829	20.2372	22.0856	21.8221	23.1152	18.8861
683.329	20.2499	22.2759	21.821	23.1441	18.8335
683.829	20.2634	22.4675	21.8273	23.1741	18.7778
684.329	20.2829	22.6621	21.8398	23.2008	18.7173
684.829	20.3109	22.8594	21.8588	23.2261	18.6556
685.329	20.3503	23.059	21.8827	23.2493	18.5995
685.829	20.3991	23.257	21.9123	23.2722	18.5425
686.328	20.4501	23.4493	21.9454	23.2954	18.4895
686.828	20.5012	23.6338	21.9795	23.3185	18.443
687.328	20.5495	23.8072	22.0123	23.3443	18.3939
687.828	20.5957	23.9682	22.0461	23.371	18.345
688.328	20.6379	24.118	22.0847	23.3977	18.2977
688.828	20.6763	24.258	22.1238	23.4255	18.255
689.328	20.7087	24.3897	22.162	23.4504	18.2128
689.828	20.7303	24.5185	22.1961	23.4712	18.1807
690.327	20.7402	24.649	22.2191	23.4872	18.1585
690.827	20.7414	24.7822	22.2309	23.4967	18.14
691.327	20.732	24.9193	22.2347	23.505	18.1222
691.827	20.7225	25.0585	22.234	23.5168	18.1089
692.327	20.7065	25.1977	22.2274	23.5314	18.1051
692.827	20.6862	25.3397	22.2126	23.5518	18.1095
693.327	20.6608	25.4829	22.1951	23.5735	18.1219
693.827	20.6287	25.6305	22.1744	23.5904	18.1388
694.326	20.5893	25.779	22.1578	23.6014	18.1542
694.826	20.5432	25.9269	22.1452	23.6007	18.1652
695.326	20.4891	26.0726	22.1283	23.5863	18.1671
695.826	20.428	26.2142	22.1092	23.5578	18.1601
696.326	20.3655	26.3509	22.0922	23.5208	18.1445
696.826	20.3003	26.481	22.0792	23.4761	18.1254
697.326	20.2355	26.6017	22.0651	23.4212	18.1059
697.826	20.1805	26.7135	22.0509	23.358	18.0905
698.325	20.136	26.8164	22.0459	23.2946	18.0744
698.825	20.1061	26.9084	22.0411	23.2241	18.0631
699.325	20.0902	26.989	22.0444	23.1533	18.0589
699.825	20.0883	27.0578	22.0539	23.0975	18.0649
700.325	20.0965	27.1142	22.0674	23.0555	18.0789
700.825	20.113	27.1606	22.0856	23.0143	18.091
701.325	20.1328	27.1982	22.107	22.9775	18.101
701.825	20.1543	27.2302	22.1331	22.946	18.1111
702.324	20.1761	27.2571	22.1643	22.9161	18.124
702.824	20.2008	27.2782	22.1952	22.8936	18.1423
703.324	20.2263	27.2954	22.2249	22.8772	18.1599
703.824	20.2573	27.3062	22.2484	22.8661	18.1672
704.324	20.2908	27.3105	22.2639	22.8608	18.167
704.824	20.329	27.3076	22.2726	22.8588	18.1656
705.324	20.3776	27.2965	22.2728	22.8513	18.1675
705.824	20.432	27.2765	22.2614	22.8345	18.1712
706.323	20.4924	27.2459	22.2473	22.8122	18.1782
706.823	20.5575	27.2008	22.235	22.7854	18.182
707.323	20.6275	27.1425	22.2236	22.7573	18.1874
707.823	20.7006	27.0737	22.219	22.7328	18.1917
708.323	20.777	26.9966	22.2242	22.706	18.1941
708.823	20.8557	26.9161	22.2358	22.6763	18.1968
709.323	20.9365	26.837	22.2512	22.645	18.2024
709.823	21.0161	26.7578	22.2701	22.6165	18.212
710.322	21.0955	26.6745	22.2875	22.5846	18.2223
710.822	21.1751	26.5849	22.3036	22.5507	18.232
711.322	21.2507	26.489	22.319	22.5191	18.2412
711.822	21.3193	26.3871	22.3326	22.4836	18.253
712.322	21.3778	26.2822	22.3491	22.4489	18.27
712.822	21.4261	26.1712	22.3695	22.4164	18.284
713.322	21.4636	26.0471	22.3938	22.3859	18.2937
713.822	21.4954	25.9084	22.4178	22.3579	18.3047
714.321	21.5211	25.7534	22.4426	22.3336	18.3114
714.821	21.5391	25.5845	22.4643	22.3117	18.3142
715.321	21.5486	25.4041	22.4759	22.2862	18.3204
715.821	21.5491	25.2159	22.4755	22.257	18.3338
716.321	21.5458	25.0193	22.4654	22.2316	18.3423
716.821	21.5385	24.8201	22.4494	22.2064	18.3459
717.321	21.5188	24.608	22.4282	22.1766	18.3514
717.821	21.4876	24.3904	22.4052	22.1452	18.3615
718.32	21.4486	24.1661	22.3859	22.1114	18.3721
718.82	21.4121	23.9375	22.3778	22.0752	18.381
719.32	21.3822	23.6984	22.3773	22.0361	18.3896
719.82	21.3459	23.4424	22.3821	21.9897	18.3975
720.32	21.3018	23.1694	22.3831	21.9458	18.4052
720.82	21.2481	22.8801	22.3815	21.9099	18.413
721.32	21.188	22.5822	22.3744	21.8731	18.4213
721.82	21.1248	22.2832	22.3686	21.8392	18.4398
722.319	21.0537	21.9723	22.3546	21.8121	18.468
722.819	20.9758	21.649	22.3392	21.7973	18.5016
723.319	20.8987	21.3297	22.3197	21.7901	18.5371
723.819	20.8261	21.0213	22.3051	21.7893	18.574
724.319	20.7595	20.7241	22.2967	21.7903	18.6134
724.819	20.7013	20.4508	22.2847	21.7945	18.6519
725.319	20.6505	20.1998	22.2678	21.7969	18.6826
725.819	20.6027	19.9849	22.2445	21.7949	18.7055
726.318	20.5547	19.8063	22.2195	21.7867	18.7233
726.818	20.5094	19.6475	22.192	21.779	18.7353
727.318	20.4662	19.5111	22.1671	21.7707	18.7473
727.818	20.4278	19.3867	22.1421	21.7563	18.748
728.318	20.3907	19.2786	22.1252	21.7338	18.7466
728.818	20.3528	19.1798	22.1136	21.7072	18.7453
729.318	20.3146	19.0907	22.1052	21.6814	18.7431
729.818	20.274	19.0121	22.0993	21.6542	18.7346
730.317	20.2338	18.9405	22.094	21.6326	18.7192
730.817	20.1934	18.877	22.0899	21.6151	18.7053
731.317	20.1539	18.8183	22.0922	21.6118	18.6967
731.817	20.1141	18.766	22.0942	21.6254	18.6944
732.317	20.0801	18.7161	22.0936	21.6456	18.6907
732.817	20.0459	18.6654	22.0884	21.6678	18.6935
733.317	20.01	18.6172	22.0782	21.6944	18.6977
733.817	19.9664	18.5675	22.059	21.721	18.6944
734.316	19.9166	18.5127	22.0368	21.7465	18.687
734.816	19.8648	18.4573	22.0087	21.7653	18.681
735.316	19.8152	18.4009	21.9836	21.7798	18.673
735.816	19.7731	18.343	21.9652	21.7933	18.6576
736.316	19.7364	18.2863	21.9517	21.8147	18.6374
736.816	19.7005	18.2372	21.9415	21.8454	18.6146
737.316	19.6662	18.194	21.9374	21.8788	18.5847
737.816	19.6348	18.1575	21.9424	21.916	18.5523
738.315	19.6066	18.1262	21.95	21.9579	18.5334
738.815	19.5812	18.0965	21.9564	22.0003	18.5116
739.315	19.5571	18.0715	21.9591	22.0417	18.4963
739.815	19.5368	18.0537	21.9559	22.0811	18.4881
740.315	19.5217	18.0419	21.9485	22.1189	18.4897
740.815	19.5104	18.0431	21.9399	22.1585	18.4961
741.315	19.5029	18.0571	21.9329	22.2008	18.507
741.815	19.4975	18.0815	21.932	22.245	18.5182
742.314	19.4902	18.1214	21.9349	22.2878	18.5289
742.814	19.4843	18.1736	21.9383	22.3311	18.5371
743.314	19.4842	18.2336	21.9396	22.3777	18.543
743.814	19.4879	18.3006	21.9377	22.4204	18.5424
744.314	19.5029	18.3729	21.9375	22.461	18.5389
744.814	19.5301	18.4508	21.9445	22.4991	18.5316
745.314	19.5654	18.5366	21.9548	22.5395	18.5086
745.814	19.6037	18.6284	21.9658	22.5817	18.4792
746.313	19.6465	18.7226	21.9763	22.6213	18.4536
746.813	19.6947	18.8215	21.9888	22.6577	18.4302
747.313	19.7461	18.923	22.0017	22.6873	18.412
747.813	19.7997	19.027	22.0151	22.7074	18.405
748.313	19.853	19.1302	22.0308	22.7172	18.4174
748.813	19.904	19.2342	22.0486	22.7162	18.4437
749.313	19.9506	19.3393	22.0681	22.7022	18.4858
749.813	19.9935	19.4448	22.0889	22.68	18.5374
750.312	20.0321	19.5497	22.1122	22.6485	18.5881
750.812	20.0658	19.6539	22.1401	22.6121	18.6424
751.312	20.0956	19.7577	22.1736	22.5754	18.6975
751.812	20.1221	19.8595	22.2046	22.5399	18.7535
752.312	20.1428	19.96	22.2279	22.5054	18.8075
752.812	20.1609	20.0618	22.2435	22.4676	18.8513
753.312	20.1755	20.164	22.2534	22.4318	18.8896
753.812	20.1874	20.266	22.2556	22.3933	18.92
754.311	20.1975	20.3666	22.2511	22.3569	18.9429
754.811	20.205	20.4638	22.2423	22.3211	18.9576
755.311	20.2069	20.5579	22.2285	22.281	18.9661
755.811	20.2022	20.6467	22.2179	22.2338	18.9786
756.311	20.1916	20.7281	22.2096	22.1851	18.9967
756.811	20.1748	20.8011	22.207	22.1388	19.0126
757.311	20.1515	20.8624	22.2067	22.0928	19.0231
757.811	20.1247	20.9125	22.2099	22.0567	19.0308
758.31	20.0954	20.9535	22.2135	22.0356	19.0334
758.81	20.0627	20.9857	22.2113	22.0242	19.0353
759.31	20.0297	21.0083	22.2078	22.0184	19.0354
759.81	19.9981	21.0223	22.2022	22.0143	19.0311
760.31	19.9656	21.0308	22.1912	22.0145	19.0291
760.81	19.9327	21.035	22.1758	22.0152	19.0349
761.31	19.8984	21.0315	22.1535	22.0098	19.0451
761.81	19.8642	21.0201	22.1311	22.0015	19.062
762.309	19.8317	21.0026	22.1078	21.9881	19.0753
762.809	19.7968	20.9796	22.0918	21.979	19.0752
763.309	19.7656	20.9489	22.0719	21.9731	19.0679
763.809	19.7362	20.9095	22.0522	21.9683	19.0584
764.309	19.7114	20.8612	22.031	21.9668	19.0433
764.809	19.6924	20.8048	22.0078	21.9634	19.0216
765.309	19.677	20.7368	21.9886	21.9606	18.9943
765.809	19.6618	20.6519	21.9653	21.9617	18.965
766.308	19.646	20.5561	21.9454	21.9631	18.9332
766.808	19.6287	20.451	21.9249	21.9688	18.8999
767.308	19.6161	20.3391	21.9047	21.9808	18.8584
767.808	19.6116	20.2258	21.8816	22.0015	18.8159
768.308	19.6094	20.1181	21.8564	22.027	18.7744
768.808	19.609	20.0102	21.8352	22.053	18.73
769.308	19.6145	19.9068	21.8135	22.0781	18.6811
769.808	19.6249	19.807	21.7974	22.0978	18.6211
770.307	19.6407	19.714	21.7859	22.11	18.5666
770.807	19.6572	19.6268	21.782	22.11	18.5284
771.307	19.67	19.5436	21.7791	22.0962	18.4884
771.807	19.6798	19.4664	21.7744	22.0713	18.4553
772.307	19.6867	19.396	21.7668	22.0387	18.4334
772.807	19.6924	19.334	21.7625	21.9963	18.4233
773.307	19.6946	19.2756	21.7597	21.9482	18.418
773.807	19.6915	19.2229	21.7553	21.8977	18.4246
774.306	19.6837	19.1767	21.7499	21.8444	18.4383
774.806	19.6734	19.1378	21.747	21.7938	18.4577
775.306	19.6642	19.1037	21.7487	21.7491	18.4804
775.806	19.6606	19.0772	21.7565	21.7118	18.5055
776.306	19.6575	19.0582	21.764	21.6769	18.5299
776.806	19.6568	19.0498	21.7741	21.6448	18.5583
777.306	19.6567	19.0465	21.7843	21.6207	18.5797
777.806	19.6579	19.0456	21.798	21.6006	18.6002
778.305	19.6611	19.044	21.8119	21.5837	18.6177
778.805	19.6659	19.0418	21.8226	21.5636	18.636
779.305	19.6749	19.0379	21.8344	21.5446	18.6551
779.805	19.6908	19.0285	21.8475	21.5255	18.671
780.305	19.7132	19.0121	21.8647	21.5148	18.6855
780.805	19.7367	18.9911	21.8862	21.5171	18.6929
781.305	19.7595	18.9639	21.907	21.526	18.702
781.805	19.7854	18.9332	21.9284	21.5436	18.7105
782.304	19.8142	18.8976	21.9484	21.5729	18.7196
782.804	19.8472	18.8557	21.9641	21.6123	18.7385
783.304	19.8794	18.8043	21.9793	21.659	18.7588
783.804	19.9131	18.7442	21.9955	21.7169	18.7844
784.304	19.9481	18.6786	22.0099	21.7926	18.8183
784.804	19.9831	18.612	22.0237	21.883	18.8466
785.304	20.017	18.5424	22.0307	21.9817	18.8706
785.804	20.0473	18.4711	22.0334	22.0907	18.8868
786.303	20.0711	18.4013	22.036	22.2091	18.8914
786.803	20.0855	18.3334	22.0299	22.34	18.8911
787.303	20.0949	18.2663	22.0186	22.482	18.8859
787.803	20.0974	18.2016	22.0057	22.6377	18.8728
788.303	20.0898	18.1401	21.988	22.8035	18.8601
788.803	20.0713	18.079	21.9669	22.9809	18.8598
789.303	20.0419	18.0217	21.9468	23.1656	18.865
789.803	20.0042	17.9668	21.9291	23.3543	18.8795
790.302	19.961	17.9192	21.9115	23.5481	18.894
790.802	19.915	17.881	21.9016	23.7471	18.9062
791.302	19.8664	17.8519	21.9012	23.9483	18.9149
791.802	19.8209	17.8321	21.907	24.1529	18.918
792.302	19.7766	17.8193	21.9191	24.3602	18.9221
792.802	19.7384	17.8108	21.9315	24.5671	18.9183
793.302	19.7039	17.8042	21.944	24.7746	18.9047
793.802	19.6795	17.7971	21.9522	24.982	18.8855
794.301	19.6711	17.7903	21.9567	25.1887	18.8618
794.801	19.675	17.7836	21.9566	25.3887	18.8431
795.301	19.6896	17.7753	21.9523	25.5797	18.824
795.801	19.7101	17.7659	21.9427	25.7595	18.8018
796.301	19.7302	17.7579	21.927	25.9249	18.7853
796.801	19.7476	17.7494	21.9065	26.0768	18.7644
797.301	19.7613	17.7409	21.8852	26.2119	18.7475
797.801	19.7685	17.7299	21.8732	26.3291	18.7479
798.3	19.7719	17.7136	21.866	26.4287	18.7583
798.8	19.7712	17.6958	21.8625	26.5159	18.7743
799.3	19.7648	17.6811	21.8625	26.5895	18.7931
799.8	19.758	17.6672	21.8668	26.6437	18.8174
800.3	19.7502	17.6557	21.8718	26.6723	18.8419
800.8	19.7426	17.648	21.8788	26.6729	18.8631
801.3	19.736	17.643	21.8866	26.653	18.8767
801.8	19.729	17.6384	21.8949	26.6303	18.8871
802.299	19.7209	17.6316	21.9067	26.6121	18.8927
802.799	19.7139	17.6208	21.921	26.5768	18.8932
803.299	19.7118	17.6105	21.9374	26.5386	18.8902
803.799	19.7104	17.5998	21.9554	26.5001	18.879
804.299	19.7062	17.5887	21.9737	26.4524	18.8678
804.799	19.6953	17.5752	21.9874	26.4062	18.8554
805.299	19.6755	17.5632	21.999	26.3673	18.8517
805.799	19.6496	17.5518	22.0074	26.3232	18.8555
806.298	19.6175	17.5401	22.006	26.2801	18.8706
806.798	19.583	17.5306	21.9991	26.2347	18.8925
807.298	19.5479	17.5242	21.99	26.1855	18.9132
807.798	19.5131	17.5245	21.9821	26.1314	18.9338
808.298	19.4785	17.535	21.9759	26.0724	18.9458
808.798	19.4418	17.5512	21.9761	26.0126	18.9526
809.298	19.4011	17.5745	21.9819	25.9518	18.9499
809.798	19.3545	17.6035	21.9937	25.8801	18.9382
810.297	19.3013	17.6379	22.0127	25.8038	18.9171
810.797	19.2432	17.6779	22.041	25.7267	18.8849
811.297	19.1813	17.7216	22.0693	25.6402	18.8449
811.797	19.1181	17.764	22.0972	25.5508	18.7934
812.297	19.0566	17.8052	22.1304	25.4538	18.7342
812.797	18.9947	17.8455	22.1699	25.3546	18.6685
813.297	18.9347	17.8833	22.2203	25.2562	18.6048
813.797	18.8768	17.9198	22.272	25.1599	18.5515
814.296	18.821	17.9566	22.3212	25.0713	18.5121
814.796	18.7673	17.9924	22.3637	24.9835	18.4842
815.296	18.72	18.0233	22.3996	24.8966	18.4613
815.796	18.6863	18.051	22.4307	24.8089	18.4506
816.296	18.6628	18.0749	22.4597	24.7244	18.453
816.796	18.6486	18.0965	22.4837	24.6378	18.4748
817.296	18.6441	18.1157	22.5047	24.5555	18.4972
817.796	18.6425	18.134	22.5216	24.4776	18.5152
818.295	18.6407	18.1515	22.5375	24.3968	18.5304
818.795	18.6369	18.1685	22.5519	24.3154	18.5395
819.295	18.6303	18.1837	22.5618	24.2359	18.5446
819.795	18.6182	18.1963	22.568	24.1564	18.5444
820.295	18.602	18.2036	22.5742	24.0763	18.54
820.795	18.5829	18.2039	22.5867	23.9948	18.5385
821.295	18.5619	18.1955	22.5973	23.9212	18.5407
821.795	18.5467	18.1777	22.6038	23.8536	18.5451
822.294	18.5411	18.1553	22.6086	23.7919	18.5565
822.794	18.5467	18.1326	22.614	23.7357	18.5851
823.294	18.5635	18.1084	22.6206	23.6857	18.6122
823.794	18.5886	18.0841	22.6284	23.6397	18.6487
824.294	18.6192	18.0635	22.641	23.5962	18.6958
824.794	18.6568	18.047	22.6547	23.5525	18.7474
825.294	18.7006	18.0323	22.6663	23.509	18.8027
825.794	18.7454	18.0189	22.6792	23.462	18.8616
826.293	18.786	18.0091	22.6908	23.4112	18.9113
826.793	18.8205	17.9997	22.7023	23.354	18.9522
827.293	18.8471	17.9914	22.7115	23.2942	18.9832
827.793	18.8672	17.9861	22.7121	23.232	19.0023
828.293	18.8843	17.9835	22.7109	23.1661	19.0202
828.793	18.8997	17.9817	22.7076	23.0979	19.0476
829.293	18.9195	17.9786	22.7001	23.0328	19.0807
829.793	18.9435	17.9731	22.685	22.9697	19.1032
830.292	18.9714	17.9614	22.6653	22.9128	19.1167
830.792	18.9991	17.9461	22.6455	22.8672	19.125
831.292	19.0258	17.925	22.6375	22.8294	19.1283
831.792	19.0531	17.9005	22.6372	22.8034	19.1299
832.292	19.0798	17.873	22.644	22.7875	19.1255
832.792	19.1012	17.8473	22.6621	22.7897	19.1077
833.292	19.1204	17.8258	22.6878	22.8134	19.0758
833.792	19.1353	17.8099	22.7255	22.8562	19.0366
834.291	19.1479	17.7961	22.7757	22.9173	19.0032
834.791	19.1574	17.785	22.8388	22.9952	18.9804
835.291	19.1637	17.7757	22.9087	23.0906	18.9583
835.791	19.1717	17.7652	22.9806	23.1993	18.9356
836.291	19.1846	17.7486	23.0553	23.3202	18.9185
836.791	19.1989	17.7277	23.1305	23.4479	18.9045
837.291	19.213	17.7028	23.2072	23.5792	18.8856
837.791	19.2235	17.6765	23.291	23.7157	18.8666
838.29	19.2302	17.6482	23.3818	23.8562	18.8504
838.79	19.235	17.6206	23.4762	24.0001	18.8309
839.29	19.241	17.5911	23.5692	24.1495	18.8069
839.79	19.2444	17.5593	23.662	24.3107	18.7847
840.29	19.2451	17.5301	23.7558	24.4785	18.7679
840.79	19.2449	17.5046	23.8498	24.6504	18.7486
841.29	19.2436	17.4847	23.9443	24.8269	18.7305
841.79	19.2454	17.4698	24.0449	25.0036	18.7193
842.289	19.2518	17.4551	24.1551	25.1723	18.7104
842.789	19.2638	17.4449	24.2752	25.3336	18.697
843.289	19.2838	17.4359	24.4034	25.4851	18.6759
843.789	19.3072	17.432	24.5417	25.6299	18.6484
844.289	19.3318	17.4325	24.6863	25.7715	18.6106
844.789	19.3561	17.4344	24.8323	25.9161	18.5635
845.289	19.3796	17.4349	24.9771	26.062	18.5142
845.789	19.4039	17.4347	25.1223	26.2091	18.4719
846.288	19.4289	17.4311	25.2663	26.3596	18.4316
846.788	19.456	17.4265	25.4111	26.5169	18.4029
847.288	19.4849	17.4181	25.5577	26.6798	18.3857
847.788	19.5149	17.4064	25.701	26.8469	18.3758
848.288	19.5468	17.3922	25.8433	27.0126	18.3731
848.788	19.5818	17.3777	25.9815	27.1737	18.3774
849.288	19.6218	17.3626	26.1145	27.3314	18.3839
849.788	19.6663	17.3444	26.24	27.4844	18.3991
850.287	19.7146	17.3272	26.3613	27.6324	18.417
850.787	19.7683	17.3103	26.4783	27.7792	18.4278
851.287	19.8253	17.2997	26.5896	27.9242	18.4355
851.787	19.8834	17.2913	26.6979	28.0678	18.4402
852.287	19.9391	17.2852	26.8017	28.2114	18.4414
852.787	19.9917	17.2843	26.9003	28.3543	18.4434
853.287	20.0425	17.2829	26.9906	28.4925	18.4423
853.787	20.0893	17.2798	27.0786	28.6262	18.4343
854.286	20.1309	17.2734	27.1659	28.7541	18.4256
854.786	20.1649	17.2648	27.2491	28.8751	18.4228
855.286	20.1904	17.2548	27.3318	28.9923	18.43
855.786	20.2055	17.2441	27.4117	29.1009	18.4382
856.286	20.2102	17.237	27.4877	29.1965	18.455
856.786	20.2079	17.2305	27.5612	29.2766	18.4773
857.286	20.1986	17.2264	27.6318	29.3438	18.506
857.786	20.1779	17.2231	27.6942	29.4035	18.5382
858.285	20.146	17.219	27.7466	29.4659	18.5743
858.785	20.1063	17.2148	27.7886	29.5267	18.6087
859.285	20.0597	17.2107	27.821	29.5841	18.6465
859.785	20.0069	17.2066	27.8429	29.6414	18.6818
860.285	19.9471	17.2049	27.8547	29.6938	18.7188
860.785	19.8871	17.2065	27.8594	29.741	18.754
861.285	19.8251	17.2124	27.8582	29.7785	18.7869
861.785	19.7684	17.2244	27.8526	29.8015	18.8205
862.284	19.7166	17.2435	27.8436	29.8115	18.8524
862.784	19.6707	17.2706	27.8329	29.809	18.8806
863.284	19.6283	17.3056	27.812	29.7955	18.9084
863.784	19.5896	17.3472	27.7777	29.7707	18.9292
864.284	19.5524	17.3953	27.7332	29.7359	18.9504
864.784	19.5177	17.448	27.6887	29.6926	18.9801
865.284	19.4867	17.5025	27.6449	29.6438	19.0205
865.784	19.4597	17.558	27.6081	29.5962	19.0531
866.283	19.4399	17.6124	27.5853	29.5421	19.0714
866.783	19.4284	17.6639	27.5616	29.4796	19.0757
867.283	19.4249	17.7107	27.5434	29.4136	19.0698
867.783	19.4292	17.7521	27.5264	29.3467	19.0594
868.283	19.4357	17.7887	27.5092	29.2753	19.0511
868.783	19.4408	17.8202	27.4948	29.1994	19.0478
869.283	19.4424	17.8508	27.4852	29.1162	19.0437
869.783	19.4407	17.8811	27.4783	29.0232	19.0364
870.282	19.4384	17.9059	27.4706	28.9179	19.0232
870.782	19.4362	17.921	27.4651	28.807	19.0043
871.282	19.4336	17.9268	27.4645	28.7012	18.9706
871.782	19.4326	17.9268	27.4714	28.6088	18.9317
872.282	19.4302	17.9205	27.4905	28.5268	18.8867
872.782	19.4271	17.9094	27.528	28.449	18.8389
873.282	19.4221	17.8918	27.5771	28.375	18.7893
873.782	19.4146	17.8698	27.6294	28.3054	18.7369
874.281	19.4048	17.8434	27.6877	28.2361	18.6851
874.781	19.3996	17.8173	27.7537	28.1683	18.633
875.281	19.398	17.7923	27.8249	28.0992	18.5851
875.781	19.4017	17.773	27.9023	28.0354	18.5466
876.281	19.4113	17.7598	27.9831	27.9743	18.5205
876.781	19.4248	17.7468	28.0682	27.9151	18.5055
877.281	19.439	17.7336	28.1635	27.8629	18.4998
877.781	19.4539	17.7207	28.2698	27.8261	18.5073
878.28	19.469	17.7093	28.387	27.7955	18.5236
878.78	19.4829	17.7027	28.5134	27.7761	18.5464
879.28	19.4958	17.6977	28.6446	27.7659	18.5763
879.78	19.5086	17.6933	28.7768	27.7711	18.6094
880.28	19.5163	17.687	28.913	27.7871	18.6445
880.78	19.5198	17.6781	29.0548	27.8092	18.6761
881.28	19.5259	17.664	29.2029	27.8381	18.7001
881.78	19.5316	17.6471	29.3533	27.869	18.7185
882.279	19.5363	17.6308	29.5001	27.8975	18.7312
882.779	19.5393	17.6172	29.644	27.9273	18.7469
883.279	19.5412	17.607	29.7852	27.9677	18.7556
883.779	19.5419	17.5992	29.9214	28.0159	18.7623
884.279	19.5366	17.5911	30.0564	28.074	18.7654
884.779	19.5309	17.5861	30.1929	28.1376	18.7554
885.279	19.5217	17.5836	30.3305	28.2053	18.7416
885.779	19.5111	17.5837	30.4759	28.2707	18.7275
886.278	19.5012	17.5876	30.6291	28.3267	18.7094
886.778	19.4919	17.5957	30.792	28.3759	18.682
887.278	19.4833	17.6083	30.9616	28.417	18.6557
887.778	19.4759	17.626	31.1333	28.4542	18.633
888.278	19.4688	17.6514	31.3081	28.4871	18.6073
888.778	19.4634	17.6814	31.4853	28.5218	18.5857
889.278	19.4594	17.7121	31.6597	28.5548	18.5745
889.778	19.4568	17.7412	31.8279	28.5939	18.5614
890.277	19.454	17.7718	31.992	28.6374	18.5499
890.777	19.4516	17.8021	32.1534	28.684	18.536
891.277	19.452	17.8327	32.3092	28.7364	18.523
891.777	19.4559	17.8643	32.4586	28.786	18.5083
892.277	19.465	17.8963	32.5985	28.8349	18.4928
892.777	19.4793	17.9256	32.7305	28.8852	18.4745
893.277	19.4985	17.9508	32.8546	28.9325	18.4653
893.777	19.5206	17.9716	32.9716	28.9727	18.4534
894.276	19.5436	17.9896	33.0823	29.0072	18.4471
894.776	19.5641	18.0064	33.1864	29.0357	18.4431
895.276	19.5836	18.0209	33.2866	29.059	18.4505
895.776	19.5989	18.035	33.3806	29.0785	18.4608
896.276	19.6097	18.0515	33.4703	29.0963	18.4756
896.776	19.614	18.0695	33.5573	29.1065	18.5008
897.276	19.6112	18.0872	33.6416	29.1066	18.5294
897.776	19.6018	18.1048	33.72	29.1018	18.5565
898.275	19.5891	18.119	33.7897	29.094	18.5786
898.775	19.5751	18.1293	33.8504	29.0843	18.5895
899.275	19.5636	18.1426	33.8976	29.0682	18.5977
899.775	19.5517	18.1556	33.9383	29.0348	18.6102
900.275	19.5423	18.1658	33.976	28.9839	18.6129
900.775	19.531	18.1726	34.0113	28.9121	18.6129
901.275	19.5182	18.1768	34.0448	28.8171	18.6101
901.775	19.5027	18.1801	34.0767	28.708	18.6035
902.274	19.4858	18.1834	34.1075	28.5906	18.5902
902.774	19.4678	18.1851	34.1358	28.4625	18.5724
903.274	19.4509	18.1863	34.1607	28.3332	18.5619
903.774	19.4341	18.1879	34.1809	28.2036	18.5592
904.274	19.4148	18.1908	34.1985	28.0602	18.5554
904.774	19.3973	18.1978	34.2141	27.9092	18.5489
905.274	19.3807	18.205	34.2286	27.7559	18.5462
905.774	19.3615	18.2116	34.2427	27.6008	18.5518
906.273	19.3464	18.2166	34.2547	27.4423	18.568
906.773	19.3322	18.2176	34.2594	27.2882	18.5817
907.273	19.3176	18.2179	34.254	27.137	18.5978
907.773	19.3035	18.2178	34.2374	26.9944	18.6154
908.273	19.2891	18.2154	34.2089	26.8639	18.6334
908.773	19.2773	18.2165	34.166	26.7389	18.6582
909.273	19.2639	18.2209	34.1088	26.6181	18.6829
909.773	19.2508	18.2239	34.0409	26.4962	18.7108
910.272	19.2351	18.2236	33.9637	26.3705	18.7419
910.772	19.2192	18.2179	33.8797	26.245	18.7659
911.272	19.2012	18.2076	33.7932	26.1225	18.7961
911.772	19.1832	18.1915	33.7073	26.0111	18.8285
912.272	19.1626	18.1715	33.6197	25.9102	18.8546
912.772	19.1384	18.1516	33.5343	25.819	18.8812
913.272	19.1142	18.1341	33.4488	25.7356	18.9115
913.772	19.0877	18.1202	33.3629	25.6629	18.9404
914.271	19.0626	18.109	33.2762	25.5953	18.962
914.771	19.0409	18.098	33.1845	25.5321	18.9769
915.271	19.0237	18.0876	33.0843	25.4769	18.9952
915.771	19.0113	18.0781	32.9783	25.4374	19.01
916.271	19.0064	18.0713	32.8655	25.4143	19.0208
916.771	19.0088	18.0657	32.7458	25.401	19.0315
917.271	19.0196	18.0616	32.6198	25.4089	19.0318
917.771	19.0318	18.0615	32.4845	25.4379	19.0249
918.27	19.05	18.0667	32.3387	25.4799	19.0096
918.77	19.0744	18.0758	32.1841	25.5275	18.9829
919.27	19.1026	18.0852	32.0193	25.585	18.9508
919.77	19.1352	18.0924	31.8417	25.6496	18.9204
920.27	19.1765	18.0949	31.6527	25.7183	18.8938
920.77	19.2279	18.0878	31.4523	25.7925	18.8672
921.27	19.2927	18.0735	31.2384	25.8684	18.8422
921.77	19.3718	18.0563	31.0156	25.9466	18.8176
922.269	19.4668	18.0393	30.7841	26.0302	18.7935
922.769	19.5779	18.0255	30.5522	26.121	18.7624
923.269	19.7131	18.014	30.3158	26.2168	18.7236
923.769	19.8699	18.0007	30.0745	26.3165	18.6779
924.269	20.0451	17.9851	29.8295	26.4197	18.6292
924.769	20.2318	17.9651	29.5816	26.5294	18.5725
925.269	20.4309	17.9419	29.3376	26.6455	18.5215
925.769	20.6391	17.9225	29.0988	26.7658	18.4752
926.268	20.8544	17.9094	28.8772	26.8925	18.4273
926.768	21.0756	17.9065	28.6624	27.0277	18.3893
927.268	21.2997	17.912	28.4498	27.1671	18.3626
927.768	21.526	17.9215	28.2456	27.3133	18.3283
928.268	21.7552	17.93	28.0487	27.4706	18.2994
928.768	21.9856	17.9349	27.8554	27.6385	18.2696
929.268	22.2154	17.9383	27.6791	27.8156	18.2389
929.768	22.442	17.9413	27.512	27.9967	18.2101
930.267	22.6616	17.9472	27.3577	28.1803	18.1811
930.767	22.8744	17.9571	27.2117	28.3684	18.1534
931.267	23.0835	17.9705	27.0705	28.5608	18.1212
931.767	23.2888	17.9859	26.9318	28.7565	18.0919
932.267	23.4918	18.0032	26.7855	28.9531	18.0706
932.767	23.6884	18.0232	26.6337	29.1476	18.0488
933.267	23.8727	18.0468	26.4815	29.3432	18.0287
933.767	24.0422	18.0727	26.3381	29.5379	18.0059
934.266	24.1968	18.0975	26.2023	29.731	17.9878
934.766	24.3387	18.1261	26.0859	29.9226	17.9717
935.266	24.4686	18.1575	25.9656	30.1111	17.9515
935.766	24.5903	18.1924	25.8557	30.2959	17.9374
936.266	24.7065	18.2308	25.7457	30.4786	17.9236
936.766	24.8143	18.2717	25.6335	30.6591	17.9133
937.266	24.9133	18.3165	25.5227	30.8363	17.901
937.766	25.0057	18.3662	25.4149	31.0141	17.9027
938.265	25.095	18.4122	25.3144	31.1937	17.9154
938.765	25.1819	18.4536	25.2143	31.3764	17.9385
939.265	25.2646	18.4897	25.1178	31.5627	17.9648
939.765	25.3497	18.519	25.0207	31.7523	17.9983
940.265	25.4286	18.5415	24.9249	31.9408	18.0339
940.765	25.5039	18.5572	24.8249	32.1239	18.0679
941.265	25.5756	18.5663	24.7277	32.3006	18.0933
941.765	25.6391	18.5683	24.6344	32.4713	18.1176
942.264	25.6964	18.5628	24.5386	32.634	18.1364
942.764	25.7469	18.5501	24.4493	32.7853	18.1491
943.264	25.7897	18.5312	24.3624	32.9285	18.1642
943.764	25.8246	18.5087	24.2714	33.0653	18.1805
944.264	25.854	18.4817	24.1788	33.2004	18.19
944.764	25.878	18.4487	24.0994	33.3305	18.1912
945.264	25.8985	18.4104	24.031	33.452	18.1777
945.764	25.9164	18.3673	23.9634	33.563	18.1515
946.263	25.9344	18.3222	23.9035	33.6625	18.1141
946.763	25.9518	18.2808	23.8517	33.744	18.0791
947.263	25.9679	18.2433	23.8082	33.8079	18.0517
947.763	25.983	18.213	23.7703	33.8614	18.0217
948.263	25.9988	18.1927	23.7416	33.9098	18.0024
948.763	26.0135	18.1851	23.7173	33.9522	17.9878
949.263	26.0242	18.1899	23.6965	33.9876	17.975
949.763	26.0288	18.2086	23.6783	34.016	17.9635
950.262	26.0265	18.2336	23.6641	34.0425	17.9569
950.762	26.0162	18.2595	23.6536	34.0682	17.9565
951.262	25.9983	18.2877	23.6438	34.0922	17.96
951.762	25.9737	18.3176	23.6347	34.115	17.9641
952.262	25.9441	18.3468	23.6218	34.1315	17.971
952.762	25.9112	18.3768	23.6062	34.1443	17.9742
953.262	25.8779	18.4088	23.5869	34.1575	17.9797
953.762	25.847	18.4423	23.5667	34.1731	17.9874
954.261	25.8158	18.4748	23.5439	34.1892	18.0003
954.761	25.7885	18.5064	23.5196	34.2096	18.0181
955.261	25.7627	18.5362	23.4901	34.2371	18.0399
955.761	25.7357	18.5627	23.4587	34.2632	18.063
956.261	25.7029	18.5872	23.4275	34.2834	18.086
956.761	25.662	18.6092	23.3936	34.297	18.1099
957.261	25.6125	18.6289	23.3551	34.3056	18.1312
957.761	25.5541	18.6433	23.3212	34.3128	18.1587
958.26	25.4837	18.6544	23.2923	34.3182	18.1938
958.76	25.4017	18.6642	23.2688	34.3224	18.2285
959.26	25.3072	18.6701	23.2473	34.3255	18.2607
959.76	25.1982	18.6735	23.2292	34.3277	18.2919
960.26	25.0693	18.6742	23.2114	34.3292	18.3237
960.76	24.9261	18.6741	23.1931	34.33	18.348
961.26	24.7694	18.6726	23.173	34.3303	18.3607
961.76	24.6041	18.6682	23.149	34.3301	18.3626
962.259	24.4269	18.6581	23.1248	34.3297	18.3548
962.759	24.2444	18.6435	23.0978	34.3289	18.3368
963.259	24.0611	18.6227	23.0658	34.3278	18.3212
963.759	23.8814	18.5969	23.0286	34.3264	18.3125
964.259	23.7074	18.5671	22.9832	34.3244	18.301
964.759	23.5451	18.5359	22.9339	34.3217	18.2955
965.259	23.3894	18.5032	22.8832	34.3178	18.2944
965.759	23.2425	18.4734	22.8336	34.312	18.3023
966.258	23.1035	18.4438	22.7862	34.3032	18.3094
966.758	22.9705	18.4179	22.7436	34.2904	18.3245
967.258	22.8454	18.3935	22.7038	34.2721	18.3499
967.758	22.7195	18.3732	22.6687	34.2471	18.3757
968.258	22.5916	18.3559	22.6391	34.2141	18.4052
968.758	22.4614	18.3422	22.6146	34.1721	18.4442
969.258	22.3287	18.3328	22.595	34.1248	18.4896
969.758	22.1935	18.3308	22.5809	34.0768	18.534
970.257	22.0532	18.3347	22.5766	34.0243	18.5835
970.757	21.9062	18.3417	22.5805	33.9731	18.6389
971.257	21.7547	18.3479	22.5937	33.9182	18.6983
971.757	21.6049	18.3565	22.6131	33.866	18.7634
972.257	21.4568	18.3654	22.6377	33.8163	18.8341
972.757	21.3125	18.3761	22.6672	33.7717	18.8986
973.257	21.1763	18.3888	22.6968	33.7302	18.9465
973.757	21.0555	18.4044	22.7207	33.6919	18.976
974.256	20.9428	18.4218	22.7358	33.6542	18.989
974.756	20.8344	18.4371	22.7449	33.6152	18.9885
975.256	20.732	18.4497	22.7495	33.5721	18.9823
975.756	20.6372	18.4586	22.752	33.5217	18.9682
976.256	20.5458	18.4657	22.7564	33.4623	18.9478
976.756	20.4566	18.4679	22.7639	33.3969	18.923
977.256	20.3645	18.4677	22.772	33.325	18.8966
977.756	20.2737	18.4676	22.779	33.2555	18.8722
978.255	20.1844	18.4674	22.7799	33.1826	18.8514
978.755	20.0985	18.4675	22.7748	33.1024	18.8304
979.255	20.0176	18.4645	22.7638	33.0198	18.821
979.755	19.945	18.46	22.7458	32.9354	18.8122
980.255	19.8867	18.4541	22.7203	32.8546	18.8024
980.755	19.842	18.4474	22.6918	32.7832	18.7937
981.255	19.8094	18.4403	22.6617	32.7162	18.7845
981.755	19.7887	18.4352	22.6338	32.6497	18.7707
982.254	19.7786	18.432	22.6093	32.576	18.7638
982.754	19.7764	18.4291	22.593	32.4937	18.7507
983.254	19.7793	18.4286	22.5919	32.4081	18.7338
983.754	19.7833	18.428	22.5955	32.3195	18.7102
984.254	19.786	18.4272	22.6023	32.2265	18.6767
984.754	19.7871	18.4261	22.6092	32.1305	18.6405
985.254	19.7869	18.4233	22.614	32.0285	18.6102
985.754	19.7859	18.4182	22.6168	31.92	18.583
986.253	19.7839	18.4114	22.6165	31.8105	18.5564
986.753	19.7825	18.4042	22.6133	31.6953	18.5364
987.253	19.7797	18.3951	22.6094	31.5772	18.5241
987.753	19.7795	18.3855	22.6069	31.4544	18.5122
988.253	19.7794	18.3708	22.6086	31.3264	18.5028
988.753	19.7782	18.3506	22.6136	31.195	18.5007
989.253	19.7767	18.3254	22.6188	31.0694	18.4957
989.753	19.7757	18.2938	22.6222	30.9556	18.4941
990.252	19.7771	18.2559	22.6266	30.8537	18.5049
990.752	19.7757	18.2108	22.6266	30.7579	18.5256
991.252	19.7717	18.1583	22.6174	30.6614	18.5503
991.752	19.7704	18.1002	22.5997	30.5621	18.5807
992.252	19.7749	18.0396	22.5765	30.457	18.6108
992.752	19.7848	17.9783	22.5525	30.3471	18.6428
993.252	19.8014	17.9144	22.531	30.2284	18.6733
993.752	19.8238	17.8482	22.5092	30.1013	18.698
994.251	19.8492	17.7793	22.4914	29.9649	18.7185
994.751	19.8771	17.7122	22.4697	29.8189	18.7405
995.251	19.9034	17.6492	22.4528	29.6612	18.7513
995.751	19.9278	17.591	22.4422	29.4906	18.7503
996.251	19.9478	17.5418	22.4359	29.3059	18.7411
996.751	19.9656	17.4993	22.4328	29.1085	18.7253
997.251	19.9799	17.4649	22.4321	28.9075	18.7239
997.751	19.9907	17.439	22.4387	28.7063	18.719
[truncated: 6,004 more rows]
