# Supplementary material for: Ionogel thin films as a compatibilizing pretreatment for electrospray deposition
Source: Royal Society of Chemistry journal article supplement (doi:10.1039/d5lp00359h), 2026-01-01
Supplement: d5lp00359h1.zip [file Porous B data.xlsx]

## Sheet: Sheet1
Lateral	Height Data	Height Data	Height Data	Height Data	Height Data
µm	nm	nm	nm	nm	nm
	C1	C2	C3	C4	C5
0	824.369	1508.24	2515.08	2194.54	48.0898
0.499875	797.101	1596.67	2599.25	2089.62	47.9538
0.99975	770.066	1660.56	2614.4	1990.66	47.7313
1.49963	739.858	1706.17	2571.05	1905.64	46.7055
1.9995	707.967	1740.44	2520.87	1835.86	45.8365
2.49938	674.76	1768.6	2462.72	1763.92	45.1939
2.99925	638.886	1794.45	2383.42	1687.86	44.1615
3.49913	597.921	1818.64	2280.36	1614.11	43.1228
3.999	550.053	1841.09	2164.74	1542.01	42.3542
4.49888	493.431	1858.47	2046.94	1467.89	41.5275
4.99875	430.735	1870.4	1922.21	1388.53	41.1618
5.49863	365.558	1876.45	1791.38	1308.33	40.4545
5.9985	301.933	1878.38	1660.27	1227.51	40.0046
6.49838	242.664	1877.48	1531.24	1146.83	38.9093
6.99825	192.198	1876.07	1402.91	1069.06	38.6508
7.49813	153.692	1876.3	1271.61	994.871	37.6046
7.998	128.242	1879.89	1140.61	925.623	36.8698
8.49788	107.203	1886.03	1008.83	861.425	35.9638
8.99775	89.3397	1892.46	881.156	801.564	35.1441
9.49763	74.549	1897.12	761.334	746.262	34.1768
9.9975	63.0007	1898.61	651.25	695.836	33.8304
10.4974	52.7977	1895.22	554.045	649.414	32.9887
10.9973	44.9111	1885.88	470.877	607.442	32.3853
11.4971	38.2646	1869.64	398.857	568.098	31.5245
11.997	32.8103	1844.49	340.877	531.451	31.1552
12.4969	28.1925	1809.88	292.906	496.079	30.2779
12.9968	24.6089	1765.18	252.508	462.991	29.7547
13.4966	21.1703	1710.92	218.519	432.184	29.098
13.9965	18.7667	1647.05	190.343	404.451	28.179
14.4964	16.7017	1574.95	166.658	378.711	27.6383
14.9963	15.2686	1495.42	146.34	355.213	27.1245
15.4961	13.7718	1409.34	129.541	333.825	26.765
15.996	12.5212	1316.44	115.095	314.747	26.1811
16.4959	11.4859	1218.78	102.744	297.133	25.7416
16.9958	10.5193	1116.72	91.6731	280.961	25.2007
17.4956	9.98428	1012.77	82.636	265.583	24.8075
17.9955	9.49491	907.375	74.4445	251.616	24.3132
18.4954	9.2747	802.031	67.6728	238.714	24.2169
18.9953	8.91943	699.328	61.6854	226.903	23.64
19.4951	8.77018	601.42	56.3475	216.098	23.1972
19.995	8.42812	510.141	51.1715	206.211	22.5318
20.4949	8.12071	427.746	47.082	197.779	22.5423
20.9948	7.46653	354.75	43.159	189.816	22.1228
21.4946	7.3489	291.626	39.4741	182.299	22.1395
21.9945	7.16214	238.86	36.1385	175.724	21.7189
22.4944	7.14902	196.882	33.2901	169.846	21.8483
22.9943	6.93005	161.739	30.7001	164.277	21.6501
23.4941	6.87728	132.275	28.7636	159.003	21.3449
23.994	6.24823	108.148	27.1212	153.903	21.0503
24.4939	6.31185	89.2754	25.8909	149.616	20.8914
24.9938	6.48213	73.8385	24.6825	146.016	20.6143
25.4936	6.75402	61.4332	23.473	142.789	20.2093
25.9935	6.86115	51.2878	22.6314	139.446	19.929
26.4934	6.90811	43.1528	22.0324	135.727	19.6574
26.9933	6.75738	36.3211	21.5344	131.526	19.272
27.4931	7.15633	30.7555	20.9869	127.162	18.7774
27.993	7.2235	26.2272	20.743	122.515	18.8157
28.4929	7.30358	22.5461	20.0293	118.253	18.2685
28.9928	7.01061	19.5551	19.9472	114.074	18.2507
29.4926	6.84398	16.9986	19.3602	110.538	18.0229
29.9925	6.82262	15.0231	18.9804	106.687	17.8201
30.4924	6.70044	13.0461	18.4151	103.283	17.3893
30.9923	6.97301	11.8808	18.0082	99.9687	17.2361
31.4921	6.62511	10.6121	17.2256	96.8558	16.8734
31.992	6.63314	9.68971	16.6518	93.6741	16.8055
32.4919	6.12469	8.71266	15.3791	90.2734	16.6672
32.9918	5.9725	8.28565	14.3778	86.7726	16.5777
33.4916	5.57254	7.77068	13.0274	83.5691	16.2826
33.9915	5.43383	7.5156	11.7033	80.5706	16.2808
34.4914	5.19977	7.12981	9.92816	77.5445	16.0743
34.9913	5.12758	6.84701	8.86724	74.7533	16.0275
35.4911	4.72479	6.41308	7.32116	72.0846	15.8871
35.991	5.00205	6.70608	6.31333	69.2846	15.6413
36.4909	4.72074	6.59732	5.13181	66.7204	15.5371
36.9908	4.74093	6.67874	4.28761	64.1329	15.1982
37.4906	4.57076	6.4385	3.41864	61.4947	14.9958
37.9905	4.82991	6.3654	2.39246	59.0287	14.938
38.4904	4.76009	6.34097	1.71007	56.3319	14.5191
38.9903	4.83573	6.36169	0.748696	53.5053	14.2347
39.4901	4.54732	6.29391	0	50.4323	14.1007
39.99	4.51587	6.3786	-0.52693	47.5342	13.8734
40.4899	4.1301	6.23168	-1.20914	44.6429	13.679
40.9898	4.15216	6.09032	-2.17437	42.2305	13.2734
41.4896	4.10656	5.95549	-2.76891	40.2783	13.1652
41.9895	4.11943	5.82742	-3.442	38.8701	13.115
42.4894	4.31849	5.5789	-3.26797	37.8118	12.9831
42.9893	4.06707	5.58532	-3.8273	37.1294	13.2518
43.4891	4.22599	5.34553	-3.46691	36.1978	12.6426
43.989	4.16798	4.97179	-3.25454	35.8779	12.3766
44.4889	4.37112	4.9714	-2.42695	35.5229	11.8447
44.9888	4.06798	4.5994	-1.7278	35.5622	11.4252
45.4886	3.86614	4.47505	-0.559567	35.5263	11.3867
45.9885	3.27662	3.98248	0.164269	34.9071	10.8534
46.4884	3.3191	3.75044	1.13339	33.8322	10.6902
46.9883	3.14517	3.67243	1.80032	32.3519	10.0293
47.4881	3.12377	3.74683	2.60542	30.1849	9.74436
47.988	2.88106	3.20388	2.87023	28.3566	9.35309
48.4879	2.79059	3.15739	3.16558	26.3125	9.22909
48.9878	2.61105	2.74581	3.08495	24.7475	8.61734
49.4876	2.47034	2.59068	2.84373	23.242	8.51192
49.9875	2.37624	2.20585	2.54702	21.4726	7.92245
50.4874	2.45907	2.3524	2.17442	20.1163	7.46649
50.9873	2.21435	1.79138	1.45037	19.3467	7.66857
51.4871	2.38704	1.77359	0.73447	18.7829	6.3961
51.987	2.35664	1.70393	-0.720607	17.8592	7.40213
52.4869	2.3594	1.95702	-1.89	16.9967	5.95909
52.9868	1.89034	1.7737	-3.21038	15.7607	6.0178
53.4866	1.9551	1.88686	-4.00497	14.107	6.13921
53.9865	2.19808	1.92382	-4.72822	11.9138	5.79012
54.4864	2.22328	1.8722	-5.49618	10.4962	5.57189
54.9863	2.00109	1.72716	-6.1782	9.19992	4.7345
55.4861	1.89749	1.74311	-7.26872	8.08155	5.04473
55.986	1.54136	1.80103	-7.75018	7.19108	4.14806
56.4859	1.31344	1.8951	-8.46715	6.9426	4.53273
56.9858	1.23413	1.76267	-8.78889	6.09262	4.22493
57.4856	1.18901	1.64199	-9.32865	5.87733	3.81439
57.9855	0.928017	1.78478	-9.59016	5.42828	3.68514
58.4854	0.956011	1.55792	-9.94635	5.22218	3.34259
58.9853	0.782323	1.44702	-10.1597	4.86964	3.53196
59.4851	0.652477	1.08066	-10.3667	4.851	3.11938
59.985	0.823112	0.962948	-10.5876	4.52738	2.82973
60.4849	0.788655	0.857318	-11.0943	4.13106	2.67405
60.9848	0.654163	0.762559	-11.3986	3.92596	1.9005
61.4846	0.413881	0.300002	-11.8737	3.55786	2.14591
61.9845	0.574702	0.354072	-12.1472	3.16536	1.55493
62.4844	0.390681	0.0694382	-12.7151	3.51944	1.73579
62.9843	0.226946	-0.0539623	-13.075	3.60862	0.947615
63.4841	-0.031777	-0.248554	-13.5864	3.86603	1.18385
63.984	0	0	-13.8669	3.59179	0.845967
64.4839	0.0785633	-0.175679	-14.2828	3.20131	0.288741
64.9838	0.189377	0.0960456	-14.3348	2.13496	0.66517
65.4836	-0.0635129	-0.048103	-14.6502	0.980541	0.24203
65.9835	-0.318111	0.14057	-15.2467	0	0
66.4834	-0.43736	0.302971	-15.4903	-1.53767	0.340541
66.9833	-0.661223	0.812305	-15.7366	-2.97408	0.260762
67.4831	-0.860597	0.906222	-16.2386	-4.35806	0.104031
67.983	-0.775849	1.06008	-16.2398	-5.35807	0.366462
68.4829	-1.03546	1.39813	-16.2286	-6.14572	0.287349
68.9828	-0.901316	1.66243	-16.7235	-6.66524	-0.287951
69.4826	-1.25197	1.71201	-16.8497	-7.25796	-0.225584
69.9825	-1.34932	1.79407	-17.3334	-7.41188	-0.122223
70.4824	-1.67994	1.79526	-17.2828	-7.26012	-0.612663
70.9823	-1.86012	1.97904	-17.1688	-6.98602	-0.688462
71.4821	-1.99243	2.35924	-16.9912	-7.18557	-0.686603
71.982	-1.93657	2.42883	-16.9996	-7.7074	-0.594136
72.4819	-2.06074	2.79903	-16.9347	-8.48387	-0.910166
72.9818	-1.99039	2.83662	-16.8957	-9.6587	-0.252484
73.4816	-1.84629	3.1469	-16.3523	-11.084	0.00740708
73.9815	-1.76456	2.96822	-15.7829	-11.9388	-0.054296
74.4814	-1.76059	3.1597	-15.0717	-13.0213	-0.205815
74.9813	-1.71845	2.84615	-14.7385	-13.2851	0.0595224
75.4811	-1.76762	3.0189	-13.8025	-13.8318	-0.260095
75.981	-1.78576	2.81036	-13.1523	-13.6946	0.074704
76.4809	-1.769	2.70945	-12.58	-14.2999	0.0689122
76.9808	-1.84071	2.22412	-12.3578	-14.9774	-0.18241
77.4806	-1.87399	2.37049	-11.9921	-16.0047	-0.309541
77.9805	-1.73646	2.04578	-11.7236	-17.2562	-0.432373
78.4804	-1.67698	1.87042	-11.1783	-18.4333	-0.427764
78.9803	-1.82805	1.86334	-10.6161	-19.4564	-0.92865
79.4801	-1.81009	1.90367	-10.1965	-19.9892	-1.18685
79.98	-1.60683	1.85747	-10.3359	-20.2122	-1.4296
80.4799	-1.59142	1.84091	-10.1792	-19.9691	-1.52384
80.9798	-1.77085	1.6005	-10.5992	-19.8925	-1.84412
81.4796	-1.38505	1.51441	-10.5958	-19.6475	-2.01996
81.9795	-1.30529	1.34583	-10.6446	-19.6516	-2.29913
82.4794	-1.05521	1.4765	-10.9979	-19.58	-2.4374
82.9793	-1.01983	1.53384	-11.1459	-19.5942	-2.81663
83.4791	-1.08723	1.50222	-11.4395	-19.8537	-2.9462
83.979	-1.12706	1.62401	-11.4833	-20.249	-3.45429
84.4789	-1.25336	1.39289	-11.4974	-20.6428	-3.59614
84.9788	-1.20663	1.1781	-11.5855	-21.2591	-4.23866
85.4786	-0.854379	0.994488	-11.7209	-21.1857	-4.63021
85.9785	-0.712451	1.35794	-11.6191	-21.2675	-4.74139
86.4784	-0.6875	1.3931	-10.9992	-21.2701	-5.06432
86.9783	-1.04683	1.32652	-10.1101	-21.4659	-5.60441
87.4781	-1.1616	0.907946	-9.61985	-21.5165	-5.47039
87.978	-1.38268	1.03242	-9.45554	-21.7174	-5.77661
88.4779	-1.31873	0.976544	-9.13354	-22.1337	-6.04231
88.9778	-1.45414	1.23637	-8.77375	-23.079	-6.00847
89.4776	-1.41009	1.30348	-8.62817	-23.9685	-6.30076
89.9775	-1.30062	1.52463	-8.19188	-25.0578	-6.55368
90.4774	-1.25345	1.37271	-7.9555	-26.5929	-6.50536
90.9773	-1.14947	1.44585	-7.29661	-28.5371	-6.90629
91.4771	-1.37105	0.857226	-7.09613	-29.8019	-6.63516
91.977	-1.04532	0.854716	-6.75084	-30.2742	-6.93657
92.4769	-1.04717	0.211362	-6.38462	-31.0164	-6.82549
92.9768	-0.902075	0.185313	-6.2579	-32.1259	-7.29097
93.4766	-1.12177	-0.194973	-6.1283	-32.2899	-7.19996
93.9765	-1.2163	-0.179822	-5.86498	-32.4464	-7.3974
94.4764	-1.30005	-0.26037	-5.4651	-31.9692	-7.25352
94.9763	-1.36866	-0.450064	-5.43842	-31.8862	-6.88095
95.4761	-1.67052	-0.879486	-5.29081	-31.1321	-6.92479
95.976	-1.69962	-1.03843	-5.38229	-30.7558	-6.53457
96.4759	-1.69448	-1.15633	-5.19622	-30.8178	-6.72547
96.9758	-1.66176	-1.22755	-4.95819	-31.3086	-6.90133
97.4756	-1.86137	-1.24763	-4.53674	-31.7544	-6.4279
97.9755	-2.04633	-1.33965	-4.18437	-31.3405	-7.19634
98.4754	-2.3282	-1.50291	-4.0397	-29.8249	-6.85324
98.9753	-2.31297	-1.48101	-3.85766	-27.5878	-7.12857
99.4751	-2.3584	-1.39532	-3.5064	-24.5072	-7.6847
99.975	-2.34107	-1.13185	-3.23707	-20.0631	-7.38702
100.475	-2.2644	-1.08741	-2.93488	-15.0066	-8.10993
100.975	-2.01414	-1.41649	-2.47917	-8.15014	-8.50061
101.475	-2.2378	-1.49854	-2.37958	0.61123	-9.02525
101.975	-2.20385	-1.69503	-2.39538	11.4485	-9.03412
102.474	-2.40615	-1.62526	-2.13554	22.1912	-10.0109
102.974	-2.72099	-1.90748	-1.96342	30.8617	-9.68976
103.474	-2.75539	-1.78663	-1.5124	37.2325	-10.0339
103.974	-2.74291	-2.12069	-1.1751	43.7184	-10.0707
104.474	-2.68874	-2.15176	-0.987866	49.4498	-10.0478
104.974	-2.60562	-2.09919	-1.10231	54.2703	-10.4877
105.474	-2.88936	-1.56961	-1.39924	57.1643	-10.4023
105.974	-3.05385	-1.68026	-1.47717	59.4359	-10.5359
106.473	-3.09109	-1.41713	-1.54461	58.9882	-11.0324
106.973	-3.50227	-1.08353	-1.56581	57.9357	-11.259
107.473	-3.65699	-0.340503	-1.37555	56.803	-11.5669
107.973	-3.9057	0.559482	-0.936985	56.1261	-11.446
108.473	-3.98381	2.011	-0.354107	55.1388	-11.5202
108.973	-3.99921	4.17526	0	54.1247	-11.687
109.473	-4.07274	7.05035	0.877257	52.5736	-11.7034
109.973	-3.953	10.6724	1.40228	50.6791	-12.0737
110.472	-4.01712	15.4529	2.17399	48.3712	-12.4248
110.972	-3.8984	20.1321	2.92466	45.4415	-12.6103
111.472	-3.46846	24.1541	3.73939	42.1931	-12.4868
111.972	-4.24598	26.2734	4.19247	38.081	-12.6809
112.472	-3.85409	26.1613	4.7324	32.8385	-12.5792
112.972	-3.49291	23.7858	4.82249	28.4073	-12.9344
113.472	-3.81038	19.7178	4.80792	24.0313	-12.8771
113.972	-3.68631	14.8799	4.56737	19.2819	-13.1461
114.471	-2.8418	11.4865	4.49997	14.8716	-12.9928
114.971	-3.04678	9.53396	4.14518	10.5409	-13.2863
115.471	-2.83264	7.88673	4.29849	6.52711	-13.2837
115.971	-2.54289	6.92055	4.26384	2.95111	-13.3495
116.471	-2.66389	5.57589	4.44716	-0.0752643	-13.2398
116.971	-2.54107	4.49655	5.01304	-2.71494	-13.3382
117.471	-1.61542	3.45903	5.60432	-4.663	-13.2829
117.971	-1.36726	3.22572	6.09011	-6.52977	-13.7057
118.47	-0.187601	2.91486	6.7175	-7.72015	-13.7342
118.97	-0.0974537	2.60486	7.36318	-9.04071	-13.9796
119.47	1.59297	2.01014	8.27334	-10.3352	-13.8201
119.97	2.33006	1.7373	9.06281	-12.06	-13.8817
120.47	1.46697	1.40925	9.58256	-13.7723	-14.309
120.97	1.95871	1.38886	10.5752	-16.1136	-14.4696
121.47	2.20751	1.03801	11.2862	-17.8144	-14.8388
121.97	0.540225	0.838679	11.9375	-19.5683	-14.774
122.469	-0.268809	0.417107	12.6425	-20.9668	-14.7562
122.969	-0.470352	0.402723	13.3905	-22.3438	-14.6672
123.469	-0.257563	0.181777	13.7875	-23.4096	-14.8914
123.969	0	0	14.3192	-24.4813	-14.6839
124.469	-1.23117	-0.258624	14.6106	-25.3586	-14.9188
124.969	-0.563519	-0.207888	15.2864	-26.0594	-14.6059
125.469	-1.19171	-0.215128	15.601	-26.2111	-14.8664
125.969	-1.76302	-0.165486	15.7976	-25.1925	-14.8344
126.468	-0.961006	-0.192988	16.0241	-23.4369	-15.1153
126.968	-1.13406	-0.182453	16.5686	-21.4732	-14.8191
127.468	-1.19167	-0.264274	16.8396	-19.7702	-14.8026
127.968	0.270716	-0.443533	17.7422	-17.5634	-14.4503
128.468	-0.146325	-0.340052	18.3103	-16.0986	-14.5171
128.968	-0.389228	-0.450391	19.1766	-14.891	-14.2677
129.468	0.964469	-0.406323	20.1113	-14.035	-13.9478
129.968	0.90653	-0.454166	21.2392	-13.4784	-14.2013
130.467	0.234213	-0.468975	22.5518	-13.2681	-14.0336
130.967	1.35219	-0.694275	23.7766	-12.7952	-13.7998
131.467	1.53024	-0.616462	24.6378	-13.0585	-13.8841
131.967	1.58257	-0.59099	25.6353	-13.2928	-13.7933
132.467	1.26544	-0.364234	26.5491	-13.6751	-13.3942
132.967	1.24197	-0.184627	27.9178	-13.991	-13.4505
133.467	1.33109	-0.0609808	29.4116	-13.8812	-13.6104
133.967	1.60095	0.129745	31.0599	-12.9892	-13.4917
134.466	2.64624	0.139102	32.7745	-11.9945	-13.5904
134.966	3.72455	0.347588	34.6078	-10.7364	-13.54
135.466	5.05012	0.64437	36.8937	-9.67016	-13.5918
135.966	7.68329	0.906247	39.3753	-7.72258	-13.8814
136.466	11.3637	1.25916	42.589	-5.78836	-13.5282
136.966	18.2305	1.58454	46.3969	-3.52371	-14.1568
137.466	29.6783	1.89278	51.6303	-0.437003	-14.404
137.966	47.4243	2.33362	57.7559	3.30346	-14.2283
138.465	74.9287	2.81809	66.1676	8.19308	-14.246
138.965	113.284	3.26106	77.3967	13.3587	-14.7224
139.465	166.003	4.34478	92.8688	18.0286	-14.3951
139.965	234.493	5.76337	113.309	21.4684	-14.6214
140.465	316.433	7.20253	141.354	23.8039	-14.5423
140.965	403.887	8.76562	177.355	25.0813	-14.6498
141.465	495.476	11.0292	222.543	25.1617	-14.4492
141.965	591.891	14.068	278.475	22.74	-14.8222
142.464	690.8	18.5985	346.97	19.4096	-14.2756
142.964	790.296	24.8823	426.703	15.582	-14.5579
143.464	891.243	33.8461	514.002	12.2497	-14.8268
143.964	990.863	46.5695	602.185	10.1766	-14.6856
144.464	1088.37	64.2051	685.592	8.55665	-14.9977
144.964	1181.26	86.8559	760.511	6.60475	-14.8841
145.464	1268.2	115.333	824.978	4.50292	-14.6925
145.964	1345.36	148.942	877.468	2.19335	-14.918
146.463	1414.1	187.01	917.879	1.37864	-14.9187
146.963	1472.93	228.014	948.802	0.60053	-14.5261
147.463	1520.07	271.11	974.725	0.0515072	-14.2197
147.963	1555	314.334	1000.66	-1.09014	-13.7543
148.463	1578.23	356.55	1028.93	-2.26393	-13.139
148.963	1588.72	397.693	1064.37	-3.86058	-12.5285
149.463	1586.95	436.573	1106.03	-4.98589	-12.0922
149.963	1574.35	472.624	1153.56	-6.08492	-11.8736
150.462	1548.29	505.346	1203.54	-7.11194	-11.9013
150.962	1511.93	534.958	1251.72	-7.75734	-11.6808
151.462	1464.12	560.656	1291.14	-8.08792	-11.9598
151.962	1406.95	582.866	1317.94	-8.44668	-11.7341
152.462	1341.45	601.406	1327.16	-8.06455	-11.7315
152.962	1268.83	616.495	1317.56	-7.81469	-11.8307
153.462	1190.61	628.923	1289.83	-7.48645	-11.8953
153.962	1107.8	640.108	1244.83	-7.36366	-11.7848
154.461	1023.33	649.099	1184.92	-7.35305	-11.8696
154.961	938.638	657.229	1109.62	-6.71017	-11.6526
155.461	855.953	665.319	1021.79	-6.43632	-11.6349
155.961	779.247	676.441	927.427	-6.16418	-11.58
156.461	709.388	693.606	827.8	-6.22918	-11.7383
156.961	647.499	718.01	723.51	-6.05822	-11.8532
157.461	594.625	747.572	615.654	-5.17186	-11.9034
157.961	549.88	778.55	508.154	-3.74805	-11.6191
158.46	510.647	807.702	402.969	-2.04082	-11.6206
158.96	476.832	834.201	302.287	0	-11.4188
159.46	448.287	857.112	209.312	1.60981	-11.1394
159.96	424.698	875.729	123.478	2.72848	-11.0489
160.46	405.224	888.652	46.9554	2.80342	-10.9127
160.96	388.39	895.23	-21.8431	2.69789	-11.1104
161.46	373.917	895.891	-83.0791	1.58318	-11.0127
161.96	361.802	891.522	-135.878	0.292567	-10.9768
162.459	350.686	882.154	-179.716	-1.39809	-10.7502
162.959	341.999	867.289	-215.63	-3.18956	-10.5821
163.459	334.112	846.956	-244.855	-5.13247	-10.4816
163.959	327.393	821.321	-269.503	-6.51805	-10.5785
164.459	321.907	791.396	-290.18	-8.02235	-10.4927
164.959	316.994	757.818	-306.865	-9.60672	-10.3368
165.459	313.389	722.904	-319.131	-11.099	-10.1114
165.959	310.855	688.875	-328.212	-11.8142	-9.94819
166.458	308.997	659.458	-334.032	-13.3353	-9.85607
166.958	307.79	633.186	-337.565	-14.3818	-10.0899
167.458	307.488	606.161	-339.099	-14.8683	-9.76431
167.958	307.276	575.395	-339.842	-14.9885	-9.61504
168.458	307.827	540.609	-339.775	-15.3539	-9.53515
168.958	309.278	501.186	-339.225	-15.2278	-9.40798
169.458	312.894	458.832	-338.251	-14.8988	-9.36604
169.958	319.238	415.658	-337.636	-14.3562	-9.29248
170.457	329.631	374.937	-337.373	-14.2836	-9.31468
170.957	345.358	337.885	-337.498	-14.9159	-9.30597
171.457	367.899	304.397	-337.595	-16.7342	-9.63388
171.957	398.73	274.586	-337.687	-19.5474	-9.53111
172.457	437.964	247.65	-337.645	-23.2001	-9.21943
172.957	484.763	223.147	-337.819	-27.3203	-9.33108
173.457	535.889	201.814	-337.672	-32.0801	-9.00056
173.957	588.407	184.97	-337.143	-36.4537	-8.97577
174.456	640.565	170.297	-336.685	-40.6089	-8.89929
174.956	690.147	158.682	-336.004	-44.5982	-8.89758
175.456	738.397	150.961	-335.16	-47.3514	-8.72265
175.956	784.357	143.187	-333.83	-49.8407	-8.87909
176.456	828.149	137.558	-332.182	-51.6292	-8.74848
176.956	868.962	133.975	-330.143	-52.9558	-8.57434
177.456	906.981	129.393	-327.762	-54.0052	-8.61885
177.956	941.47	127.283	-324.715	-55.6391	-8.89226
178.455	971.938	124.706	-321.31	-57.1015	-9.01027
178.955	997.765	123.546	-317.378	-59.3562	-8.82692
179.455	1017.2	123.124	-313.26	-61.7234	-8.83894
179.955	1029.06	122.204	-308.433	-63.9552	-8.80474
180.455	1033.89	121.934	-303.241	-66.0243	-8.84358
180.955	1030.53	122.52	-297.917	-68.6377	-8.94574
181.455	1019.88	121.498	-292.422	-70.9609	-8.96535
181.955	1002.71	122.306	-286.551	-72.8419	-8.87684
182.454	979.357	122.199	-280.324	-74.1164	-8.41063
182.954	951.35	122.245	-272.884	-74.8791	-8.19285
183.454	918.79	122.71	-264.786	-74.6247	-7.74514
183.954	881.268	122.989	-255.928	-73.7694	-7.46056
184.454	837.433	123.474	-247.289	-72.5603	-7.2459
184.954	788.023	124.215	-238.535	-70.8019	-7.12339
185.454	735.543	125.136	-230.221	-68.8503	-6.98281
185.954	683.288	126.416	-222.662	-67.4934	-7.08303
186.453	629.702	127.99	-216.017	-66.5302	-7.17605
186.953	576.928	129.793	-209.639	-66.0976	-7.24837
187.453	527.536	132.273	-203.455	-66.1743	-7.16159
187.953	482.967	134.521	-197.389	-66.1883	-7.15907
188.453	445.198	137.791	-191.994	-66.653	-7.24405
188.953	414.446	141.552	-187.192	-67.1783	-7.16291
189.453	389.867	146.608	-182.734	-68.5752	-7.28724
189.953	370.92	152.692	-178.321	-69.2262	-7.24166
190.452	353.911	161.154	-173.866	-69.4599	-7.2653
190.952	339.888	172.326	-169.881	-69.028	-7.22669
191.452	327.855	187.928	-165.329	-68.6112	-7.36445
191.952	317.495	209.99	-160.247	-67.0728	-7.03658
192.452	307.605	241.119	-154.179	-65.4525	-7.2304
192.952	299.525	282.53	-147.708	-64.6346	-6.57139
193.452	291.648	336.64	-139.845	-64.1238	-6.55739
193.952	284.621	403.768	-131.661	-63.7366	-5.97276
194.451	278.035	483.307	-122.826	-63.7491	-6.20997
194.951	271.517	571.676	-114.052	-64.2719	-5.92424
195.451	264.88	663.434	-105.46	-64.4778	-5.85875
195.951	258.9	755.164	-97.0151	-63.7422	-5.90512
196.451	253.419	845.21	-88.6201	-62.9706	-6.06125
196.951	248.796	931.114	-80.5877	-61.8702	-6.18841
197.451	245.776	1011.33	-71.8457	-60.6587	-6.26743
197.951	242.424	1084.45	-62.5259	-59.3305	-5.90701
198.45	239.886	1150.12	-51.3467	-57.7721	-5.98517
198.95	238.086	1206.32	-38.3387	-56.1421	-5.64508
199.45	236.663	1251.37	-22.2496	-54.3714	-6.14383
199.95	235.597	1285.14	-2.41438	-52.7748	-5.98857
200.45	235.109	1308.07	22.802	-51.7918	-5.89983
200.95	234.648	1320.55	53.8028	-50.9481	-6.13633
201.45	234.019	1324.16	90.7623	-50.0883	-5.94218
201.95	233.797	1321.41	133.818	-49.1649	-6.05476
202.449	233.323	1315.38	182.764	-47.883	-5.72854
202.949	233.065	1309.76	236.224	-46.2227	-5.8392
203.449	232.639	1308.01	295.268	-44.5922	-5.65275
203.949	232.295	1313.8	358.266	-43.1968	-5.92018
204.449	232.052	1329.4	422.669	-42.004	-5.52084
204.949	232.437	1356.56	486.474	-41.7264	-5.82672
205.449	232.464	1393.05	548.747	-41.4165	-5.6034
205.949	232.505	1437.06	609.216	-41.3139	-5.83707
206.448	232.711	1484.69	666.028	-41.5199	-5.78036
206.948	233.234	1534.76	718.782	-41.7326	-5.91518
207.448	233.708	1587.42	766.634	-41.5045	-5.73477
207.948	234.618	1643.18	807.721	-41.2863	-5.85836
208.448	235.562	1703.27	841.896	-40.7025	-5.54342
208.948	236.102	1769.34	870.482	-40.1653	-5.54522
209.448	236.434	1840.86	894.495	-39.6325	-5.26176
209.948	236.787	1917.36	915.91	-39.8249	-5.58029
210.447	236.911	1996.88	933.526	-40.5685	-5.63501
210.947	236.944	2079.66	948.123	-41.8641	-5.90276
211.447	237.298	2163.83	958.89	-42.7573	-5.99348
211.947	237.897	2249.39	967.313	-43.6104	-5.63101
212.447	238.264	2335.81	972.581	-44.0296	-5.56276
212.947	238.923	2423.43	975.936	-43.7359	-5.55676
213.447	239.655	2510.5	977.846	-42.7327	-5.48521
213.947	240.477	2596.99	978.827	-41.2086	-5.46651
214.446	241.526	2682.25	979.043	-39.5446	-5.49599
214.946	242.685	2766.6	979.043	-37.8002	-5.18715
215.446	243.828	2848.37	978.872	-36.0681	-4.90781
215.946	245.088	2928.68	979.17	-33.9639	-4.54246
216.446	246.243	3006.5	979.531	-32.7574	-4.72668
216.946	247.465	3081.47	980.731	-32.1051	-4.58503
217.446	249.091	3152.79	981.735	-31.9744	-4.21653
217.946	251.619	3219.98	983.185	-32.1585	-3.74783
218.445	254.078	3281.73	984.33	-32.4066	-3.70459
218.945	257.578	3339.55	985.391	-32.9488	-3.10956
219.445	262.053	3395.19	986.48	-33.5158	-3.23014
219.945	267.942	3448.09	987.598	-34.3482	-3.09914
220.445	276.186	3502.07	988.877	-34.9692	-3.33931
220.945	289.717	3558.85	990.079	-35.1871	-3.07498
221.445	309.187	3619.85	991.23	-36.256	-3.42287
221.945	337.595	3682.39	992.626	-38.2191	-3.51422
222.444	377.164	3744.45	994.337	-41.315	-3.57609
222.944	430.01	3804.49	996.312	-44.9514	-3.47742
223.444	497.566	3860.51	998.499	-48.8221	-3.72158
223.944	579.999	3911.98	1000.98	-52.4494	-3.56105
224.444	672.219	3959.95	1004.22	-55.8464	-3.8637
224.944	769.122	4003.39	1007.8	-58.6768	-4.13391
225.444	868.215	4044.57	1011.8	-62.1524	-4.09547
225.944	967.692	4083.24	1016.26	-65.4012	-3.72661
226.443	1066.34	4120.12	1021.25	-68.4185	-4.15966
226.943	1162.4	4157.62	1026.6	-71.3679	-3.89713
227.443	1254.55	4198.65	1032.63	-74.8229	-3.91159
227.943	1341.68	4244.6	1038.96	-78.3501	-3.71197
228.443	1422.1	4295.89	1046.11	-82.5944	-3.55064
228.943	1495.47	4354.13	1054.18	-87.1432	-3.32133
229.443	1560.69	4418.24	1063.58	-91.3516	-2.91837
229.943	1618.59	4484.99	1074.09	-94.614	-3.24817
230.442	1668.94	4555.03	1086.44	-97.5325	-3.20447
230.942	1709.56	4629.54	1101.14	-99.4233	-3.64439
231.442	1740.26	4709.17	1119.42	-100.031	-3.42744
231.942	1761	4793.54	1141.28	-98.1701	-3.52281
232.442	1770.11	4881.75	1167.29	-94.8751	-3.4275
232.942	1768.75	4969.81	1197.54	-89.4023	-3.49817
233.442	1759.77	5055.41	1231.41	-81.7751	-3.22024
233.942	1743.66	5138.36	1268.88	-70.4132	-3.20382
234.441	1721.7	5221.19	1308.62	-55.1568	-2.57057
234.941	1696.66	5302.4	1350.23	-36.2687	-2.69807
235.441	1668.63	5383.36	1392.11	-13.2569	-2.10669
235.941	1636.11	5466.11	1431.72	14.2686	-1.91864
236.441	1599.31	5548.67	1467.23	46.9323	-1.53983
236.941	1558.8	5629.9	1499.45	82.4377	-1.10432
237.441	1517.76	5708.86	1528.83	118.147	-1.51036
237.941	1477.57	5783.97	1556.64	150.036	-1.13041
238.44	1441.9	5855.24	1583.7	175.379	-1.30494
238.94	1410.61	5923.32	1611.57	194.157	-0.777121
239.44	1381.86	5987.91	1641.98	210.825	-0.524247
239.94	1353.66	6052.61	1676.13	224.371	-0.434951
240.44	1326.09	6117.81	1713.2	234.43	0
240.94	1299.36	6182.69	1751.69	245.069	0.166098
241.44	1276.82	6247.36	1789.13	258.788	0.563392
241.94	1261.08	6312.53	1822.93	273.403	1.0838
242.439	1253.83	6376.88	1849.34	287.04	1.48603
242.939	1252.54	6439.62	1865.43	300.084	1.78578
243.439	1257.63	6498.45	1869.48	312.449	2.27335
243.939	1270.21	6553.19	1860.4	323.209	3.25828
244.439	1288.35	6604.73	1835.11	335.548	4.16458
244.939	1310.81	6653.43	1793.63	348.106	5.40015
245.439	1336.63	6700.23	1737.53	362.086	6.8776
245.939	1365.12	6746.28	1672.91	377.573	8.61396
246.438	1395.38	6790.37	1606.02	392.739	10.4831
246.938	1423.75	6831.83	1534.15	408.439	12.4693
247.438	1447.08	6870.91	1456.26	425.872	14.6801
247.938	1464.44	6906.32	1374.3	443.546	16.598
248.438	1472.22	6938.3	1291.94	464.525	18.0886
248.938	1469.71	6968.82	1214.83	491.465	20.5708
249.438	1455.71	6998.38	1144.39	521.97	22.607
249.938	1429.57	7026.74	1079.16	559.242	25.6096
250.437	1391.78	7054.16	1019.96	599.518	28.2597
250.937	1344.79	7081.63	967.449	644.617	31.3322
251.437	1289.87	7110.67	919.277	694.522	34.756
251.937	1232.18	7141.46	874.019	748.76	38.0666
252.437	1175.01	7176.27	834.784	804.971	42.5573
252.937	1121.99	7216.88	802.737	866.782	46.5197
253.437	1077.27	7263.02	775.972	936.885	50.9654
253.937	1042.24	7313.37	755.57	1008.09	55.5766
254.436	1018.18	7368.09	739.643	1078.64	60.1442
254.936	1007.87	7423	726.527	1146.25	66.0907
255.436	1013.1	7476.95	716.18	1209.67	72.0563
255.936	1030.97	7530.99	707.15	1266.72	77.9636
256.436	1056.2	7585.59	699.873	1319.01	84.103
256.936	1086.99	7640.5	692.994	1365.86	89.6296
257.436	1120.5	7695.72	687.994	1408.26	94.9499
257.936	1155.72	7752.21	683.966	1447.24	100.273
258.435	1193.25	7807.73	681.904	1483.91	105.088
258.935	1231.62	7861.33	680.843	1516.54	110.176
259.435	1271.15	7912.15	681.317	1545.68	115.384
259.935	1310.9	7962.19	681.892	1573.82	120.463
260.435	1351.89	8011.5	683.8	1599.79	126.362
260.935	1393.91	8060.73	687.241	1624.16	133.237
261.435	1439.36	8111.49	692.29	1644.92	140.797
261.935	1486.51	8163.37	698.855	1662.59	150.353
262.434	1536.04	8213.76	707.026	1677.23	161.339
262.934	1587.86	8263.73	716.297	1688.83	174.175
263.434	1641.79	8314.54	726.423	1700.84	191.332
263.934	1697.36	8368.09	736.938	1713.79	211.649
264.434	1755.88	8424.98	747.171	1725.47	237.615
264.934	1814.54	8482.2	756.416	1738.52	269.155
265.434	1872.08	8541.72	765.244	1750.13	305.496
265.934	1927.59	8604.49	773.039	1757.87	348.369
266.433	1979.77	8670.92	780.123	1763.64	397.557
266.933	2028.61	8740.64	786.419	1763.37	452.093
267.433	2073.79	8812.25	792.073	1756.22	513.851
267.933	2115.63	8886.68	797.725	1739.89	583.727
268.433	2155.2	8963.21	803.753	1716.31	662.174
268.933	2192.74	9041.33	810.752	1690.19	749.662
269.433	2227.4	9118.48	818.518	1665.9	846.053
269.933	2260.14	9197.48	827.799	1645.65	952.478
270.432	2292.87	9277.87	839.068	1630.79	1068.68
270.932	2326.74	9357.51	853.111	1620.99	1194.02
271.432	2361.63	9437.65	869.85	1617.68	1330.12
271.932	2399.92	9518.03	890.41	1613.3	1476.92
272.432	2442.11	9597.98	914.425	1605.84	1631.91
272.932	2489.96	9674.61	941.795	1596.2	1792.76
273.432	2545.2	9745.99	971.878	1584.19	1955.75
273.932	2609.09	9813.91	1003.68	1568.85	2114.74
274.431	2682.88	9877.86	1035.6	1553.95	2263.12
274.931	2767.61	9939.95	1066.31	1540.7	2398.83
275.431	2860.05	10001.4	1093.92	1530.6	2521.49
275.931	2958.43	10061.2	1117.04	1521.69	2633.54
276.431	3059.32	10119.8	1135.14	1520.3	2740.2
276.931	3161.45	10178.9	1147.47	1521.9	2841.2
277.431	3260.94	10237.1	1154.28	1521.89	2936.42
277.931	3358.76	10294	1157.44	1522.58	3023.36
278.43	3455	10349.6	1158.12	1520.82	3101.78
278.93	3550.98	10404.4	1157.51	1514.71	3171.51
279.43	3646.25	10462.1	1159.11	1505.56	3232.2
279.93	3740.83	10522.5	1162.72	1495.41	3284.53
280.43	3833.61	10584.6	1166.2	1485.43	3330.86
280.93	3924.65	10652	1167.02	1480.06	3373.53
281.43	4011.97	10729.1	1164.52	1480.75	3411.33
281.93	4094.34	10814.1	1158.34	1487.86	3446.62
282.429	4170.73	10901.8	1148.36	1497.08	3483.45
282.929	4240.86	10990.9	1133.69	1508.71	3520.37
283.429	4305.45	11080.7	1114.05	1524.61	3553.56
283.929	4367.58	11168.8	1091.68	1543.37	3584.33
284.429	4427.47	11255	1070.25	1563.15	3613.48
284.929	4487.74	11337.9	1052.18	1582.48	3639.07
285.429	4548.82	11415.6	1037.69	1598.63	3660.05
285.929	4610.47	11488.9	1024.94	1611.43	3675.43
286.428	4673.77	11559.8	1014.08	1622.45	3690.59
286.928	4741.91	11628.4	1001.94	1630.24	3709.28
287.428	4814.07	11696.9	988.963	1636.39	3740.05
287.928	4890.29	11765.4	975.609	1641.66	3784.93
288.428	4968.8	11832.8	963.722	1644.73	3846.69
288.928	5049.13	11900.2	952.614	1642.74	3921.53
289.428	5129.48	11968.8	941.724	1633.81	4004.3
289.928	5208.23	12038.1	931.923	1618.47	4091.42
290.427	5284.04	12108.5	924.277	1596.41	4181.86
290.927	5356.27	12179.2	918.2	1569.71	4271.34
291.427	5424.21	12249.8	913.65	1540.65	4357.23
291.927	5488.13	12318.9	910.157	1517.94	4438.4
292.427	5550.32	12386.1	907.949	1501.95	4517.04
292.927	5612.87	12449.2	906.596	1485.41	4592.79
293.427	5677.84	12508	906.743	1466.61	4667.87
293.927	5745.35	12560.6	907.988	1452.24	4749.81
294.426	5815.89	12605.7	909.855	1440.11	4837.96
294.926	5886.78	12642	911.714	1428.12	4926.52
295.426	5960.93	12671.1	913.218	1415.03	5016.06
295.926	6038.55	12694.6	914.752	1403.24	5105.62
296.426	6119.53	12713.2	916.71	1396.49	5190.68
296.926	6203.75	12727.7	920.613	1392.45	5271.81
297.426	6292.1	12740.7	925.553	1389.9	5348.77
297.926	6388.19	12753.1	932.012	1385.92	5421.73
298.425	6492.49	12768.8	939.902	1380.31	5491.91
298.925	6598.52	12788.1	950.295	1371.11	5558.33
299.425	6702.86	12811.9	963.126	1358.53	5620.87
299.925	6805.16	12837.7	978.612	1341.53	5679.78
300.425	6903.05	12867.6	996.583	1322.72	5738.29
300.925	6995.08	12900.8	1016.83	1300.54	5791.89
301.425	7078.35	12934.6	1037.58	1276.33	5846.72
301.925	7152.02	12971	1059.3	1252.78	5902.22
302.424	7215.8	13012.1	1080.67	1230.71	5959.47
302.924	7269.78	13058.7	1102.31	1208.99	6019.91
303.424	7316.71	13109.8	1122.67	1184.94	6082.09
303.924	7358.52	13164.3	1142.38	1158.84	6144.56
304.424	7396.57	13219.9	1161.35	1132.65	6211.19
304.924	7432.4	13276.1	1180.76	1104.52	6282.36
305.424	7466.88	13332.9	1200.12	1077.93	6354.72
305.924	7502.44	13392.1	1220.27	1053.84	6427.23
306.423	7539.63	13454.1	1241.31	1030.69	6503.28
306.923	7578.7	13521.3	1263.6	1009.1	6581.05
307.423	7620.43	13593.5	1286.63	988.08	6662.29
307.923	7667.79	13671.4	1310.6	966.653	6747.72
308.423	7721.89	13754.2	1335.02	943.764	6839.66
308.923	7782.87	13838.8	1360.93	921.661	6940.36
309.423	7848.99	13922.6	1388.86	900.188	7041.5
309.923	7918.28	14004.7	1418.76	880.928	7142.56
310.422	7990.09	14086.6	1450.37	864.036	7242.39
310.922	8063.55	14169	1482.55	848.093	7337.8
311.422	8135.63	14248.6	1514.62	835.993	7429.77
311.922	8205.76	14323.1	1545.34	828.309	7518.34
312.422	8274.96	14393.7	1573.28	820.458	7602.97
312.922	8343.22	14461.6	1597.61	813.167	7684.15
313.422	8412.25	14526.2	1617.9	805.619	7759.39
313.922	8480.4	14586.1	1633.46	800.208	7829.23
314.421	8547.91	14641.8	1645.81	796.028	7893.21
314.921	8614.5	14691.4	1654.11	793.236	7950.23
315.421	8683.92	14733.9	1658.98	790.323	7999.59
315.921	8755.81	14769.8	1658.7	788.877	8040.23
316.421	8830.91	14800.4	1652.36	788.616	8073.03
316.921	8909.21	14826	1637.69	788.409	8100.39
317.421	8990.53	14849.4	1613.28	788.712	8129.07
317.921	9074.85	14874.7	1578.2	788.007	8162.35
318.42	9161.22	14902.2	1534.23	786.198	8197.38
318.92	9248.63	14929.2	1479.5	785.099	8237.15
319.42	9336.51	14957.1	1416.42	785.266	8282.29
319.92	9424.55	14985.9	1345.99	785.984	8329.53
320.42	9513.3	15014.7	1272.89	788.254	8377.23
320.92	9602.71	15041.7	1200.92	790.169	8424.73
321.42	9694.46	15068.7	1135.26	792.538	8469.88
321.92	9786.82	15093.1	1077.27	795.354	8508.06
322.419	9879.82	15116	1025.05	799.626	8546.56
322.919	9974.86	15139.6	977.84	804.348	8587.32
323.419	10072.3	15163.5	931.171	810.21	8630.11
323.919	10173.2	15186.4	885.242	816.519	8673.91
324.419	10274.4	15208.3	842.051	823.809	8725.12
324.919	10372.5	15230.2	802.251	831.005	8784.08
325.419	10464.1	15251.3	767.651	838.545	8848.31
325.919	10546	15275.2	737.468	846.937	8919.59
326.418	10618.2	15301.2	710.939	856.834	8998.03
326.918	10681.3	15330.5	687.606	867.333	9077.99
327.418	10735.5	15362.1	666.479	879.313	9157.16
327.918	10783	15397.4	645.839	891.316	9235.35
328.418	10827	15435.3	625.458	903.882	9309.07
328.918	10871.2	15472.2	606.577	915.476	9380.38
329.418	10915.7	15508.3	589.362	925.583	9454.09
329.918	10960.8	15543.1	574.041	934.409	9527.63
330.417	11006.6	15576.6	558.852	944.666	9602.36
330.917	11053.2	15608.6	543.059	951.854	9684.88
331.417	11101.6	15640.7	526.202	955.996	9770.12
331.917	11151.3	15670.3	509.064	956.199	9853.07
332.417	11202.7	15699.6	491.598	954.48	9928.97
332.917	11258.9	15731	473.915	951.662	10001.9
333.417	11319.9	15763.1	455.825	948.845	10074.1
333.917	11390.2	15793.9	438.967	947.303	10151
334.416	11471.6	15820.9	425.285	947.736	10230.1
334.916	11564.4	15842.7	414.851	948.025	10317.9
335.416	11673.2	15859.7	407.337	946.608	10411.9
335.916	11796.8	15870.3	402.995	944.286	10504.5
336.416	11932.5	15875.1	400.403	942.574	10593.5
336.916	12080.6	15876.2	399.488	941.88	10682.1
337.416	12240	15872.8	399.616	940.163	10771.7
337.916	12410.9	15865.3	401.128	937.214	10863.9
338.415	12591.5	15855.7	404.12	934.292	10960.9
338.915	12780.1	15847	408.043	931.985	11060
339.415	12975.5	15842.2	412.567	929.73	11158.3
339.915	13179.9	15846.7	417.34	927.907	11256.1
340.415	13393.2	15860.3	422.994	925.104	11351.6
340.915	13614.1	15882.2	430.13	923.764	11439.9
341.415	13840.9	15907.9	437.008	920.834	11522.7
341.915	14075.9	15938.1	442.947	916.947	11598.7
342.414	14316.9	15970.8	447.241	913.728	11664.8
342.914	14562.8	16002.8	450.391	909.698	11721.3
343.414	14814.5	16032	454.188	906.332	11764.3
343.914	15073.2	16058.3	459.678	903.615	11794.1
344.414	15336	16081.7	467.674	899.428	11814.3
344.914	15602	16102.1	477.808	894.619	11828.4
345.414	15868.6	16121.6	491.245	888.972	11834.4
345.914	16134.3	16138.9	508.161	882.797	11833.5
346.413	16400	16154.6	529.892	877.311	11827.3
346.913	16664.6	16168.5	555.092	871.596	11822.1
347.413	16929.7	16183.1	583.615	863.919	11819
347.913	17195.2	16198.3	615.422	855.974	11822.4
348.413	17460.7	16212.8	649.917	847.318	11831.5
348.913	17728.3	16225.8	683.93	839.163	11843.1
349.413	17998.7	16239.1	716.326	831.366	11863
349.913	18269.8	16252.9	746.369	824.617	11889.8
350.412	18538.7	16269.1	774.335	815.926	11924.7
350.912	18805	16286.4	799.811	807.293	11966.1
351.412	19066.5	16305.7	823.942	799.352	12015.8
351.912	19328.3	16322.8	846.277	791.867	12074.4
352.412	19593.1	16336.6	867.673	784.812	12140.6
352.912	19859.4	16348.6	887.871	777.886	12211.2
353.412	20124.2	16358.8	907.157	771.769	12287.8
353.912	20382.1	16369.9	925.082	765.606	12367.1
354.411	20634.6	16379.8	940.939	759.858	12443.5
354.911	20878.9	16387.5	953.178	753.832	12518.1
355.411	21115.6	16394.5	961.878	748.295	12588.7
355.911	21346.1	16404.1	967.481	742.506	12656.2
356.411	21567.6	16415.1	970.299	735.572	12725.8
356.911	21786.2	16424.6	971.496	728.417	12801.1
357.411	21997.3	16433.1	969.94	720.837	12875.6
357.911	22203.2	16441.9	965.672	713.222	12952.2
358.41	22402.3	16451	959.126	706.197	13030.2
358.91	22593.7	16458.3	951.88	700.09	13105.2
359.41	22777.6	16461.7	944.606	695.764	13171.1
359.91	22954.5	16461.7	937.09	692.693	13231.7
360.41	23124.8	16458.1	929.078	690.915	13287.6
360.91	23290.5	16450.5	921.316	690.797	13335.6
361.41	23454.3	16439.8	913.824	692.388	13377.3
361.91	23617.9	16428.4	906.876	694.858	13411.9
362.409	23780.1	16417.2	900.395	698.492	13445.4
362.909	23939.2	16407.2	894.578	702.333	13476.3
363.409	24093.6	16399.3	890.022	707.051	13509.6
363.909	24241.6	16392.6	887.953	710.485	13552.7
364.409	24382.7	16385.9	887.517	711.913	13602.7
364.909	24516.1	16380.4	888.087	712.103	13659
365.409	24642.4	16379	889.827	710.725	13721
365.909	24760.1	16384.2	892.477	708.826	13786.1
366.408	24873.1	16393.5	895.481	706.437	13855
366.908	24976.3	16405.1	898.774	703.998	13929.1
367.408	25075.9	16421.6	902.574	701.711	14011.4
367.908	25171.7	16439.1	907.273	698.994	14095.4
368.408	25262.6	16456.9	912.034	696.115	14180
368.908	25348.5	16474.1	917.544	692.861	14262.2
369.408	25428.8	16489.9	923.533	689.038	14340.4
369.908	25504.8	16508.6	930.099	685.889	14416.6
370.407	25575.9	16533.3	938.329	682.199	14489.6
370.907	25640	16561.7	947.501	679.516	14558.8
371.407	25698.7	16595.9	956.894	677.547	14621.6
371.907	25751.8	16632.3	965.471	676.955	14677.9
372.407	25800.7	16669.3	974.211	676.092	14729.2
372.907	25845.4	16705.9	982.531	676.376	14780.6
373.407	25886.3	16742.7	990.998	676.717	14836.9
373.907	25920.9	16781.2	999.368	677.584	14899.1
374.406	25947.8	16822.2	1007.94	678.54	14972.4
374.906	25968.1	16864.7	1016.31	680.235	15058.9
375.406	25978.8	16907.9	1025.65	681.288	15163.7
375.906	25979.7	16949.6	1035.3	682.309	15275.8
376.406	25971.8	16989.2	1045.95	682.102	15393.2
376.906	25954.8	17026.8	1057.49	681.428	15508.3
377.406	25929.3	17063.2	1069.88	681.577	15622.5
377.906	25894.5	17099.9	1082.85	682.532	15732.4
378.405	25851.4	17137.1	1095.78	684.38	15831.4
378.905	25802.1	17172.9	1106.99	687.048	15916.2
379.405	25747.3	17207.6	1114.74	690.664	15986.1
379.905	25688.4	17242.3	1116.25	694.795	16042.8
380.405	25627.4	17279.7	1110.86	699.453	16087.5
380.905	25561	17318.9	1099.45	704.367	16125.9
381.405	25491.1	17356.1	1083.22	709.875	16157
381.905	25419.6	17390	1066.45	715.556	16181.1
382.404	25344.6	17421.4	1049.18	720.206	16200.1
382.904	25271.3	17448.3	1029.8	725.508	16213.8
383.404	25191.9	17470.4	1007.37	731.543	16227.2
383.904	25106.8	17485.6	981.917	737.534	16232.9
384.404	25019.3	17493.9	955.039	742.846	16230.7
384.904	24930.7	17495	926.174	747.053	16225.6
385.404	24837.9	17487.8	898.239	750.137	16222.1
385.904	24741.7	17476.1	874.226	752.055	16217.4
386.403	24644.9	17465.2	856.408	752.143	16215.3
386.903	24548.4	17451.3	843.879	751.531	16214.4
387.403	24455.5	17435.5	836.101	752.042	16216
387.903	24361.2	17418.4	832.171	753.298	16214.8
388.403	24268.2	17399.2	830.509	756.983	16210.6
388.903	24180	17381.1	827.124	760.788	16206.9
389.403	24093.9	17365.2	820.614	765.006	16201.4
389.903	24006.4	17352.3	812.999	769.82	16195.1
390.402	23914.4	17344.5	807.015	775.354	16185.1
390.902	23819.7	17343.2	803.263	780.464	16167.6
391.402	23721	17346.4	800.841	786.691	16145.7
391.902	23616.1	17353.2	798.652	793.276	16121.4
392.402	23509.9	17360.3	795.226	803.647	16101.2
392.902	23395	17364.7	790.211	820.27	16083.1
393.402	23276.8	17365.3	783.512	840.103	16067.1
393.902	23157.7	17364	776.104	861.67	16052.2
394.401	23041.7	17359.2	768.16	881.859	16032.1
394.901	22925	17351	761.623	896.752	16005.2
395.401	22802.8	17338.4	756.525	906.392	15972.6
395.901	22675.1	17321.2	753.113	910.006	15934.7
396.401	22539.6	17298.7	750.088	909.88	15893.1
396.901	22393.1	17272.4	748.27	908.899	15851.3
397.401	22239.5	17242.7	748.432	907.452	15813.9
397.901	22083.7	17212	750.895	908.575	15779.2
398.4	21930.1	17179.7	754.885	912.919	15745.1
398.9	21780.4	17152.7	761.834	918.111	15723.9
399.4	21635.7	17126.9	771.693	923.87	15711.6
399.9	21496.3	17098.7	784.881	930.806	15707.2
400.4	21362.9	17067.6	802.563	938.714	15709
400.9	21235.4	17034.4	825.481	945.334	15712.2
401.4	21118.7	17003.1	854.236	951.601	15717.1
401.9	21011	16974.8	889.084	959.662	15724.1
402.399	20916.6	16950.4	929.62	969.145	15733.8
402.899	20832.2	16935.9	975.495	981.005	15741
403.399	20756.3	16928	1026.3	995.102	15745
403.899	20684.8	16923.4	1081.08	1009.57	15751.4
404.399	20613.8	16919.2	1139.85	1025.95	15763.6
404.899	20545.9	16913.7	1201.52	1042.29	15784.4
405.399	20474.8	16908.6	1265.53	1056.68	15813.6
405.899	20400.9	16903.9	1331.37	1068.69	15851.7
406.398	20326.8	16899.4	1399.27	1077.65	15895.6
406.898	20253.1	16894.2	1467.79	1081.83	15942.3
407.398	20185.2	16890.2	1537.07	1080.11	15988.4
407.898	20126.7	16887.6	1606.08	1071.91	16032.6
408.398	20075.8	16885.2	1675.56	1056.07	16072.5
408.898	20031.8	16885.7	1743.79	1035.43	16107.1
409.398	19996.6	16887.9	1810.11	1009.66	16137.7
409.898	19964.8	16887.5	1872.9	980.975	16165.1
410.397	19927.2	16886	1931.45	954.144	16190.5
410.897	19884.9	16882.4	1982.16	929.193	16210.8
411.397	19838.7	16877.3	2021.22	906.192	16232.6
411.897	19787	16871.2	2045.72	886.49	16251.7
412.397	19734.2	16865.5	2054.14	867.682	16268.4
412.897	19679.5	16863.1	2047.99	849.004	16282.9
413.397	19623.2	16863.4	2028.9	831.064	16295.6
413.897	19568.2	16867.9	1997.23	814.046	16307.3
414.396	19515.3	16875.4	1957.66	798.946	16315.9
414.896	19467.3	16887.7	1913.26	785.375	16316.1
415.396	19424.4	16903.3	1869.86	775.215	16311.6
415.896	19385.1	16923.2	1827.13	768.035	16308.8
416.396	19348.7	16948.9	1788.08	762.068	16300.1
416.896	19316.3	16979.3	1751.52	756.032	16286.4
417.396	19286.4	17010.1	1715.36	746.534	16274
417.896	19259	17039.3	1680.41	734.531	16258.9
418.395	19234.2	17066.1	1647.07	721.554	16245.9
418.895	19212.2	17088.8	1613.93	708.502	16238.6
419.395	19191.7	17105.5	1580.34	697.159	16235.1
419.895	19168.9	17117.2	1548.66	685.312	16232.6
420.395	19145.7	17123.1	1517.75	673.697	16231.9
420.895	19124.3	17123.2	1486.08	661.848	16232.2
421.395	19106.6	17118.8	1455.6	650.441	16233.5
421.895	19087.6	17111.5	1429.92	640.939	16237.9
422.394	19069.5	17102.4	1409.64	631.64	16242.5
422.894	19048.6	17091.8	1393.6	622.642	16244.6
423.394	19025.3	17079.7	1380.66	614.577	16246
423.894	19002.2	17071.3	1370.95	606.721	16245.7
424.394	18979.3	17062.7	1365.02	600.357	16244.5
424.894	18959	17055.6	1361.22	594.893	16243.6
425.394	18940.2	17053.7	1358.27	590.669	16245.7
425.894	18921.8	17057.2	1355.67	586.839	16248.6
426.393	18901.4	17069.4	1354.73	584.235	16253.5
426.893	18878.7	17087.2	1355.81	581.887	16263.6
427.393	18850.2	17108.9	1358.12	578.737	16275.8
427.893	18821.6	17133.2	1358.7	575.84	16285.2
428.393	18793.1	17159	1356.81	572.523	16298.2
428.893	18771.2	17184.5	1353.43	568.831	16315.4
429.393	18752.7	17209.2	1348.09	564.694	16329.9
429.893	18739.9	17233	1341.93	559.815	16342.1
430.392	18726.9	17255.9	1337	553.95	16354.9
430.892	18714.6	17277.5	1334.56	547.079	16363.2
431.392	18699.6	17299.3	1334.64	539.817	16363.3
431.892	18687.8	17323	1335.7	532.781	16356.8
432.392	18678.6	17343.7	1336.73	526.909	16346.6
432.892	18674.3	17360	1337.92	522.389	16336.5
433.392	18672.5	17372.1	1339.34	519.21	16324.5
433.892	18675.2	17381.1	1340.54	516.528	16309.8
434.391	18683.8	17387.2	1342.46	514.193	16292.2
434.891	18699.9	17391.1	1344.29	512.947	16274
435.391	18724.1	17390.8	1346.27	511.799	16254.7
435.891	18752.8	17385.9	1348.23	511.883	16236.5
436.391	18783.7	17379.3	1350.07	513.485	16218.9
436.891	18815.2	17370.8	1350.25	515.947	16201.4
437.391	18848.3	17360	1349.25	519.136	16185
437.891	18881.9	17348.4	1347.12	522.954	16173.7
438.39	18914.1	17336.8	1344.49	527.067	16163.9
438.89	18944.5	17325.1	1340.31	530.89	16162.9
439.39	18972.8	17310.9	1335.83	533.986	16168.4
439.89	18999.2	17294.4	1331.39	535.483	16179.7
440.39	19021.6	17278.4	1326.76	534.773	16195.4
440.89	19039.9	17261.1	1321.82	531.989	16208.4
441.39	19051.3	17242	1317.15	527.2	16220.6
441.89	19058.9	17221.6	1312.63	521.57	16229.7
442.389	19060.8	17199.8	1309.44	515.216	16236.3
442.889	19059.2	17181.2	1307.25	508.765	16239.4
443.389	19056.5	17171.9	1306.57	503.943	16238.7
443.889	19056.1	17167	1306.73	500.717	16236.2
444.389	19059.2	17163.1	1308.13	499.164	16228.5
444.889	19063.1	17162.9	1310.5	498.317	16216
445.389	19064.9	17167.2	1313.65	498.43	16205.6
445.889	19063.9	17176.4	1317.64	498.787	16199.4
446.388	19058.8	17191.5	1322.65	498.34	16196.3
446.888	19049.2	17210.9	1327.89	497.545	16198.9
447.388	19033.7	17230.3	1333.97	496.795	16203.2
447.888	19011.1	17251.3	1341.33	495.509	16211.1
448.388	18982.1	17275.4	1350.09	494.867	16222.7
448.888	18946.1	17300.8	1360.37	493.931	16235
449.388	18907.8	17326.9	1371.81	492.718	16249.1
449.888	18866.2	17353.4	1384.88	490.63	16266.1
450.387	18822.6	17382.6	1399.65	488.092	16287
450.887	18777.9	17419.5	1416.71	485.084	16308.7
451.387	18731.4	17465.3	1434.85	482.623	16332
451.887	18688	17523	1453.31	479.35	16349.8
452.387	18649.7	17591.5	1471.58	476.268	16368.2
452.887	18619	17670	1488.88	473.178	16387.7
453.387	18594.9	17756.3	1504.75	470.007	16403.6
453.887	18575.7	17847.8	1519.75	466.323	16416.4
454.386	18559.9	17941.7	1533.6	463.109	16427.5
454.886	18550.9	18035.2	1548.22	460.379	16441.9
455.386	18551.3	18127.3	1563.93	458.742	16457.9
455.886	18560.9	18219.5	1582.05	457.252	16471
456.386	18578.8	18312.5	1602.53	455.765	16476.7
456.886	18601.9	18405.3	1626.88	454.382	16471.6
457.386	18628.7	18495.9	1654.31	453.221	16458.1
457.886	18658.1	18582.8	1684.44	451.913	16442.1
458.385	18687.5	18666.1	1716	450.612	16427.4
458.885	18717.4	18746.2	1748.11	449.26	16417.6
459.385	18743.7	18820.6	1779.33	449.079	16410.9
459.885	18765.7	18888.5	1809.09	449.785	16407
460.385	18782.9	18950.2	1837.82	450.52	16397.5
460.885	18799.2	19004.9	1865.3	451.001	16384.6
461.385	18811.9	19052.7	1891.79	451.34	16370
461.885	18820.3	19096.3	1918.52	452.805	16358.3
462.384	18824.5	19134.1	1946.27	453.651	16349
462.884	18829.4	19166.8	1975.82	455.466	16343.5
463.384	18832.7	19195.1	2010.35	456.983	16348.6
463.884	18839.3	19217.7	2049.98	458.148	16365.5
464.384	18848.6	19235.3	2094.54	459.077	16386.9
464.884	18863.4	19248.5	2143.61	460.952	16408.2
465.384	18881.1	19259	2196.27	462.617	16424.2
465.884	18901	19266.3	2252.71	464.301	16430.6
466.383	18920.3	19270	2314.3	466.823	16431
466.883	18940.2	19268.4	2381.62	470.067	16428.7
467.383	18963.3	19262.7	2454.42	474.44	16428.1
467.883	18989	19252.7	2529.73	480.62	16429.4
468.383	19016.3	19237.2	2605.29	487.884	16432.9
468.883	19044.1	19216.3	2678.09	496.576	16442.7
469.383	19072	19192.7	2743.93	507.002	16452.5
469.883	19098.4	19167.8	2797.86	518.892	16464.5
470.382	19126.4	19141	2838.15	531.481	16480.4
470.882	19152.3	19112.7	2864.51	544.639	16501.1
471.382	19175.5	19079	2878.49	558.008	16522.6
471.882	19194.6	19042.9	2879.81	571.973	16544
472.382	19209.8	19006.8	2870.26	585.137	16563.2
472.882	19220.2	18968.7	2859.68	595.908	16584.2
473.382	19225.6	18927.2	2856.4	604.354	16610.9
473.882	19227.4	18879.6	2861.11	610.04	16638.2
474.381	19226.9	18829.3	2872.06	611.023	16666.9
474.881	19221.6	18774.9	2888.4	608.828	16697.2
475.381	19214.3	18719.5	2907.8	603.823	16727.9
475.881	19203.7	18658.5	2929.62	593.771	16756.8
476.381	19192.1	18594.8	2952.21	580.055	16783.6
476.881	19181.7	18531.2	2977.09	563.964	16807.2
477.381	19173.9	18467	3005.18	551.559	16821.7
477.881	19169.4	18409.4	3035.92	536.733	16826.2
478.38	19167.5	18359.4	3071.16	520.924	16823.8
478.88	19168.5	18318.7	3106.58	510.395	16819.4
479.38	19171.7	18289.7	3138.96	507.285	16821.7
479.88	19176.4	18267.4	3167.66	508.301	16826.8
480.38	19181.1	18255.9	3188.79	515.306	16836.6
480.88	19185.1	18249.5	3204.56	527.833	16844
481.38	19191.9	18248.7	3217.49	546.605	16846.5
481.88	19202.2	18254.2	3232.63	572.428	16841.7
482.379	19214.5	18264.4	3250.28	606.924	16837.8
482.879	19232.4	18276.8	3270.61	644.135	16838.4
483.379	19256	18289.5	3295.85	684.572	16840.7
483.879	19280.3	18299.6	3325.26	729.073	16841
484.379	19301	18307.5	3357.44	780.749	16846.5
484.879	19317.9	18310.9	3394.46	840.754	16859.3
485.379	19331.8	18309.2	3436.81	912.152	16875.6
485.879	19343.1	18302.9	3485.11	996.018	16891.8
486.378	19354.9	18294.1	3538.64	1092.19	16911.6
486.878	19370.5	18283	3597.06	1199.29	16931
487.378	19388.1	18270.2	3660.5	1313.3	16950.7
487.878	19406	18257.6	3728.75	1431.91	16963.3
488.378	19423.5	18241.7	3800.63	1551.2	16964.3
488.878	19438.4	18223	3874.89	1669.84	16955.6
489.378	19449.9	18201	3948.05	1786.73	16941.6
489.878	19460.2	18179.2	4019.6	1903.58	16926
490.377	19470.7	18157	4086.76	2020.44	16912
490.877	19485.1	18133.2	4149.92	2136.97	16901.3
491.377	19504.2	18107.4	4210.38	2248.03	16894.2
491.877	19526.8	18079.3	4269.57	2351	16893.4
492.377	19554.8	18046.5	4332.73	2442.87	16900.5
492.877	19587.9	18011.3	4402.1	2524.59	16912.7
493.377	19622	17975.6	4477.21	2596.38	16927.5
493.877	19656.3	17938.2	4560.24	2667.39	16944.2
494.376	19688.6	17900.5	4653.03	2734.28	16964.4
494.876	19719.4	17863.9	4754.46	2795.77	16989
495.376	19748.2	17832.5	4860.86	2854.58	17020.6
495.876	19775.7	17805.9	4966.14	2911.49	17059.3
496.376	19802.3	17786.5	5069.59	2973.35	17103.7
496.876	19831.1	17775.1	5173.81	3038.34	17157.3
497.376	19863.4	17770.1	5279.45	3106.94	17217.2
497.876	19900.3	17773.1	5382.82	3187.33	17277.9
498.375	19943.8	17780.1	5480.65	3274.39	17338.8
498.875	19989.8	17788.7	5567.99	3372.46	17394.6
499.375	20034.7	17802.1	5641.52	3481.79	17439.4
499.875	20077.5	17818.7	5705.03	3598.92	17468.4
500.375	20115.6	17840.9	5763.24	3721.42	17486.9
500.875	20146.9	17868.1	5820.35	3852.22	17498.3
501.375	20172	17898.9	5875.8	3991.02	17511.1
501.875	20190.1	17932.9	5929.43	4133.22	17525.5
502.374	20203.1	17972.8	5979.44	4273.79	17536.6
502.874	20208.5	18014.7	6026.57	4411.31	17540.2
503.374	20208.8	18058.2	6070.14	4546.04	17540.3
503.874	20205.9	18103.7	6105.77	4684.03	17537.6
504.374	20199	18150.7	6140.16	4826.71	17531.8
504.874	20186.4	18198.4	6174.37	4972.11	17523.3
505.374	20168.9	18247.6	6204.14	5125.82	17513.7
505.874	20145.8	18299.7	6231.03	5279.08	17498.5
506.373	20116.8	18351.5	6259.61	5428.05	17482.9
506.873	20081.6	18402.1	6290.84	5572.84	17462.3
507.373	20043.4	18450.4	6323.36	5715.8	17433.3
507.873	20002.2	18500.1	6356.89	5857.97	17397.9
508.373	19962.1	18550.8	6393.73	5995.29	17354.8
508.873	19927.3	18604.1	6434.95	6126.73	17305.3
509.373	19900.9	18657.5	6481.06	6253.74	17254.5
509.873	19884.1	18714.2	6530.48	6372.95	17197.4
510.372	19878.6	18770.4	6584.54	6488	17137.6
510.872	19885.1	18823.3	6639.77	6601.55	17077.1
511.372	19900.7	18874.2	6696.36	6714.97	17017.9
511.872	19921.4	18921.7	6755.16	6825.08	16966.1
512.372	19941.8	18965.4	6817.88	6931.18	16927.5
512.872	19961.5	19006.1	6884.65	7032.72	16891.2
513.372	19977.6	19043	6953.44	7134.05	16866.3
513.872	19987.3	19078.8	7025.43	7231.93	16850.5
514.371	19992.1	19112	7100.45	7322.77	16844.5
514.871	19995.7	19146.1	7181.1	7408.37	16850.4
515.371	19995.4	19180.6	7269.64	7484.33	16863
515.871	19991.8	19217.5	7362.17	7552.17	16878
516.371	19987.6	19253.5	7456.33	7613.84	16896.1
516.871	19982.4	19289.1	7551.51	7669.36	16914.7
517.371	19974.7	19323.9	7646.78	7719.94	16932.9
517.871	19962.7	19358	7742.76	7766.32	16953.3
518.37	19945.7	19390.6	7839.56	7811.34	16978.3
518.87	19924.4	19423.7	7934.14	7853.79	17004.6
519.37	19898.8	19457.2	8028.83	7892.41	17039.6
519.87	19869.6	19492.4	8123.07	7925.58	17075.6
520.37	19836.3	19528.5	8220.42	7957.4	17111.1
520.87	19803.3	19564.8	8321.94	7991.75	17146.5
521.37	19769.5	19598.8	8426.12	8033.98	17178
521.87	19735.7	19629.1	8533.06	8094.17	17211
522.369	19700.9	19654.7	8641.51	8159.88	17249.1
522.869	19663.2	19673.6	8751.11	8233.15	17289.1
523.369	19624.9	19686.3	8860.51	8315.3	17325.8
523.869	19588.9	19692.5	8968.17	8400.22	17360.5
524.369	19555.4	19691.4	9075.17	8489.35	17397.4
524.869	19522.6	19683.8	9182.04	8582.33	17431.5
525.369	19495.5	19670.1	9288.65	8675.92	17464.7
525.869	19474.7	19651.3	9395.42	8772.05	17503.7
526.368	19460	19626.9	9497.74	8865.56	17539.8
526.868	19453.4	19594.8	9593.78	8957.8	17568.8
527.368	19455.2	19557.4	9685.09	9047.01	17592.6
527.868	19469.5	19517.7	9771.16	9134.67	17615.2
528.368	19493.2	19472.7	9847.5	9217.74	17641.4
528.868	19527	19424.1	9914.79	9299.5	17669.8
529.368	19572.8	19373.8	9970.41	9375.59	17698.4
529.868	19628	19319.5	10017	9450.99	17727.6
530.367	19690.3	19258.1	10058.4	9528.84	17749.3
530.867	19755.7	19192.7	10095.6	9608.52	17767.8
531.367	19828.2	19129.1	10131.3	9687.76	17781.8
531.867	19902.7	19068	10166.5	9764.72	17794.4
532.367	19980.2	19009.5	10197.1	9843.45	17807.4
532.867	20061.3	18956.9	10223.1	9923.12	17822.7
533.367	20142.2	18907.4	10249.1	10006.9	17842.1
533.867	20218.9	18860.9	10280.3	10090.3	17863.3
534.366	20289.8	18820.6	10317.6	10175.8	17884.1
534.866	20354.3	18786.5	10358.5	10264.7	17903.8
535.366	20411.5	18756.5	10402.6	10350	17925
535.866	20461.5	18728.3	10448.3	10424.5	17942.3
536.366	20503.8	18697.6	10495.2	10490.5	17949.2
536.866	20538.4	18662	10544.6	10556.8	17947.2
537.366	20568.5	18619.6	10596.6	10632	17937.1
537.866	20594.1	18573.7	10654.3	10717.6	17920.9
538.365	20617.2	18528.6	10718.5	10813.2	17900.7
538.865	20637.3	18485.5	10785.2	10906.3	17877.6
539.365	20651.9	18447.1	10850.9	10995.2	17852.1
539.865	20662.1	18411.4	10918.1	11077.3	17826.5
540.365	20671.2	18375.5	10985.7	11154.7	17803.6
540.865	20677.1	18339.6	11051.3	11223.8	17780.4
541.365	20679.4	18304.5	11117	11287.4	17756.3
541.865	20679	18269.6	11184.5	11342.7	17736.4
542.364	20677.9	18233.4	11251.4	11400.3	17719.2
542.864	20677.4	18196.7	11315.9	11464.4	17708.9
543.364	20680.3	18161.5	11382.5	11528.2	17697.7
543.864	20685.7	18131.3	11448.1	11590.3	17686.6
544.364	20689.2	18104.8	11515.7	11659	17674.4
544.864	20691.8	18084.2	11587	11733.8	17658.9
545.364	20692.8	18070.7	11661.5	11816.7	17638.8
545.864	20694.1	18064	11739.1	11900.7	17613.4
546.363	20693.5	18060.3	11824.6	11987.5	17584.5
546.863	20690.7	18056.4	11916.6	12082.2	17556.6
547.363	20685.7	18050.6	12015	12179.5	17532.7
547.863	20680.4	18041.4	12122.2	12278.7	17513.4
548.363	20673.3	18027.2	12234.4	12386.7	17494.9
548.863	20663.4	18009.7	12347.8	12503	17480.8
549.363	20650.9	17988.3	12461.6	12618.4	17469
549.863	20637.3	17959.7	12575.5	12729.7	17462.7
550.362	20623.5	17922.6	12691.3	12835.3	17461.1
550.862	20608.3	17875	12807.1	12938.8	17454.4
551.362	20591.8	17824.7	12921.4	13040.5	17443.4
551.862	20573.4	17776.8	13030.3	13133.1	17433.2
552.362	20552.4	17734.6	13128.5	13216.2	17421.1
552.862	20527.9	17700.2	13213.8	13298.4	17407
553.362	20499.8	17673.1	13286	13381.3	17392.7
553.862	20470.5	17654.6	13345.1	13466.1	17380.1
554.361	20442.7	17645.5	13394.5	13553.7	17373.2
554.861	20418	17640.9	13439.1	13641.8	17374.3
555.361	20395.9	17641.3	13477.5	13730.5	17378
555.861	20378.1	17647.3	13505.4	13816.4	17381.4
556.361	20364.7	17658.7	13527.7	13896.3	17386
556.861	20357.7	17670.5	13547	13977	17390.9
557.361	20358	17681.5	13562.8	14054.9	17394.6
557.861	20363.2	17694.3	13577.1	14129.7	17395.1
558.36	20373.7	17706.5	13586.7	14198.1	17395.2
558.86	20386.3	17716.4	13597.7	14259.6	17392.3
559.36	20398.3	17724	13608.1	14316.8	17382.9
559.86	20412.3	17732.6	13619.2	14373.7	17367.8
560.36	20427.5	17742.5	13631.7	14437	17346.2
560.86	20444.5	17751.1	13646.5	14508.4	17321.6
561.36	20461.7	17758.9	13667.9	14590.8	17303.5
561.86	20475.8	17764.3	13699.7	14675.7	17291.5
562.359	20486.2	17767.3	13745.1	14756.5	17282.4
562.859	20492.7	17766.8	13803.2	14831.4	17274.6
563.359	20497.3	17763.4	13871.1	14894	17268.8
563.859	20501.3	17757.8	13949.2	14946.8	17261.7
564.359	20504.6	17750.5	14034.8	14993	17251.5
564.859	20507.4	17742	14125.7	15027.8	17238.2
565.359	20508.3	17734.1	14216.2	15058.2	17222.6
565.859	20509	17730.7	14305.9	15085.6	17202.6
566.358	20508.4	17728.8	14398.2	15102.5	17184.9
566.858	20502.5	17727.1	14494	15117.9	17169
567.358	20492.3	17730.7	14587.9	15130.4	17155.3
567.858	20478.5	17738.4	14683	15138.9	17145.2
568.358	20461.6	17752.6	14778.4	15156.6	17142.7
568.858	20446.1	17769.2	14875.4	15178.8	17146.8
569.358	20432.8	17786.7	14971.5	15200.5	17157.6
569.858	20419.7	17802.3	15067.1	15221.4	17173.6
570.357	20406.8	17817	15159.9	15242	17191.2
570.857	20402.2	17831.5	15249.4	15258.1	17207.6
571.357	20404.7	17846.3	15335.3	15275.8	17218.9
571.857	20410.8	17861.2	15418	15295.3	17226.2
572.357	20419.9	17872.5	15498.9	15317.3	17233
572.857	20435.9	17884.5	15575.8	15351.6	17239.9
573.357	20457.4	17896.1	15648.8	15400.3	17245.1
573.857	20481.2	17908.4	15718.6	15467.5	17254
574.356	20507.8	17923.5	15787.2	15536.6	17271.1
574.856	20537.9	17938.4	15852.9	15602.8	17299.1
575.356	20571.2	17954.1	15914.7	15665.3	17337.4
575.856	20606.1	17971.4	15976.3	15724.1	17380.4
576.356	20642.1	17993.1	16037.8	15785.4	17428
576.856	20677.9	18017.5	16097.8	15847.4	17479.2
577.356	20713.2	18041.7	16152.9	15903.2	17527.5
577.856	20751	18061.2	16205.2	15959.8	17573.6
578.355	20790.4	18079.3	16257.7	16017.3	17611
578.855	20832.1	18093.5	16313.2	16070	17640.7
579.355	20874.9	18102.7	16372.9	16125.9	17666.2
579.855	20917.7	18106.7	16436.8	16181.1	17694.6
580.355	20959.6	18104.1	16503	16237.4	17720.6
580.855	20997.8	18097.4	16569.1	16292.1	17744.1
581.355	21031.5	18086.7	16630.2	16338	17759.9
581.855	21059.8	18073.5	16686.5	16379.9	17776.3
582.354	21081	18058.5	16739.4	16424.5	17797.9
582.854	21098.8	18040.1	16787.9	16470.6	17820.3
583.354	21111.6	18018.4	16832.8	16512.6	17840.4
583.854	21118.6	17996	16875.1	16557.6	17864.2
584.354	21118.5	17971.9	16917.6	16609.2	17887.1
584.854	21111.3	17946.7	16962.9	16671.6	17905.8
585.354	21096.6	17925.5	17009.2	16742.5	17920.6
585.854	21073.5	17904.8	17056	16807.6	17936.2
586.353	21045.7	17889	17100.9	16863.7	17946.9
586.853	21015.1	17875.8	17141.3	16916.6	17953.6
587.353	20981.2	17867.2	17177.8	16969.1	17954
587.853	20944	17862.4	17210.4	17028.3	17952.7
588.353	20905.6	17861.6	17240.7	17092.5	17949.9
588.853	20868.7	17864.1	17270.6	17162.8	17940.1
589.353	20832.1	17871.6	17300.9	17246	17924.4
589.853	20795.2	17882	17333.3	17336.2	17900.6
590.352	20759.4	17896.6	17369	17426.1	17873.5
590.852	20725.3	17914.6	17409.1	17512.6	17845
591.352	20693.2	17934.5	17456.7	17595.9	17816.5
591.852	20662.3	17954.6	17514.7	17682.3	17790.5
592.352	20630.6	17976.6	17583.7	17774.4	17769.1
592.852	20600.1	18000.6	17662	17865	17757.8
593.352	20570.4	18023.1	17745	17953.7	17752.8
593.852	20543.7	18046.1	17831.2	18040.3	17755.7
594.351	20517.8	18068.9	17922.3	18124.5	17759.4
594.851	20490.3	18092.3	18017.3	18208.6	17767.8
595.351	20460.6	18116.4	18114.2	18287.3	17778.3
595.851	20428.3	18140.8	18211.1	18363.2	17786.1
596.351	20394	18165.3	18306.9	18439.1	17788
596.851	20357.4	18188.9	18403.7	18510.6	17787.6
597.351	20319.7	18210.1	18500.3	18582.5	17785.3
597.851	20284.3	18226	18597.1	18652.5	17783
598.35	20250.4	18237	18692.7	18721.9	17780.9
598.85	20217.9	18244.5	18787.4	18791.4	17783.1
599.35	20189.9	18248	18881.2	18866	17789.4
599.85	20169.4	18249.9	18975.9	18944.9	17797.9
600.35	20154.1	18249.7	19070.4	19020	17808.1
600.85	20141	18248.9	19158.6	19100.6	17813.6
601.35	20126.1	18247.7	19237.3	19195.8	17815
601.85	20109.7	18249.9	19303.4	19294.1	17815.4
602.349	20093.6	18252	19355.4	19392.4	17809.2
602.849	20081.1	18252.9	19399.3	19488.6	17797.5
603.349	20069.3	18250.6	19439.3	19581.9	17778.7
603.849	20058.4	18245.8	19473.4	19674.7	17764.6
604.349	20050.8	18240.3	19503.7	19764.2	17753.5
604.849	20047.8	18234.1	19531.7	19844.6	17749.6
605.349	20052.5	18225.5	19560.2	19921.8	17747.1
605.849	20067.7	18215.3	19586.9	19992.4	17757
606.348	20089.8	18208.8	19612.8	20051.5	17774
606.848	20120.8	18208.8	19640.9	20104.7	17800.2
607.348	20159.1	18214.9	19670.5	20155	17835.5
607.848	20206.8	18225.4	19708.4	20200.4	17876.5
608.348	20261	18242.2	19756.4	20236.9	17917.1
608.848	20316.8	18260.3	19805.3	20267.1	17962.5
609.348	20373.3	18280.3	19853.7	20293.8	18005.3
609.848	20428	18302.9	19901.9	20317.5	18047.5
610.347	20480.5	18326.1	19946.9	20337.3	18088
610.847	20528.7	18347.8	19988.2	20355.8	18126.3
611.347	20569.8	18368.7	20025.7	20377.1	18159.7
611.847	20602.9	18388.6	20061.8	20402.3	18190.1
612.347	20629.1	18408.2	20096.2	20432.5	18215.2
612.847	20648.3	18428.2	20127.1	20461.6	18235.5
613.347	20663.2	18447.4	20156.8	20488.7	18251.2
613.847	20674.3	18462.2	20185	20513.2	18262.9
614.346	20686	18471.7	20208.5	20536.9	18273.2
614.846	20694.6	18475.7	20229.1	20566	18289
615.346	20705.3	18477.6	20250.3	20597.2	18308
615.846	20718.4	18477.3	20270.9	20627	18330.8
616.346	20735.7	18473.4	20294.1	20658.5	18357.4
616.846	20759	18464.4	20317.2	20691.9	18383
617.346	20784	18452.1	20336.3	20721.1	18406.4
617.846	20811.4	18436.2	20353.4	20744.7	18441.4
618.345	20837.8	18415.8	20372	20760.4	18488
618.845	20859.3	18392.9	20394	20769.9	18550.7
619.345	20873.9	18369.9	20414.6	20767.1	18627.9
619.845	20882.2	18349.3	20432.2	20753.6	18712
620.345	20883.4	18328.9	20449.4	20734	18810.3
620.845	20878.2	18304.5	20467.2	20711.2	18921.4
621.345	20868.7	18280.4	20484.8	20692	19039.5
621.845	20857.8	18252.3	20504.4	20679.1	19163.2
622.344	20846	18221	20535.2	20669.4	19294.1
622.844	20834.4	18186.9	20573.9	20658.9	19429.5
623.344	20821	18149.8	20619.3	20642.5	19570.3
623.844	20801.6	18111.8	20664.4	20625.1	19712.5
624.344	20774.2	18071.9	20710.7	20615.8	19854.5
624.844	20735.6	18031.6	20753.4	20602.5	19995
625.344	20684.5	17992.8	20790.9	20582.9	20130.7
625.844	20622.4	17962.2	20823.4	20559.2	20259
626.343	20549.9	17935.2	20855.4	20524.2	20381.1
626.843	20469.7	17915.1	20886.8	20484.9	20502.2
627.343	20384.8	17900.8	20917.3	20441.3	20628.9
627.843	20296.9	17892.7	20945.8	20391.1	20762.2
628.343	20211.6	17893.7	20974.8	20340.3	20903.5
628.843	20134.6	17898.7	21010.2	20297.7	21044.9
629.343	20069.1	17906.5	21050	20272.3	21190.3
629.843	20016.2	17916.2	21089	20250.8	21342
630.342	19973.5	17926.7	21126.6	20235.5	21501.6
630.842	19943.6	17939.2	21166.3	20228.5	21669
631.342	19927	17955.3	21210	20231.2	21843
631.842	19918.8	17975.9	21257.1	20238.4	22015.7
632.342	19919.3	18002.9	21304.9	20244	22182.4
632.842	19930.8	18035.8	21354.1	20252.7	22340.9
633.342	19944	18071.1	21400.6	20265	22485.9
633.842	19963.4	18102.7	21445.3	20283.6	22610.3
634.341	19986.2	18128.6	21483.7	20300.1	22716.9
634.841	20013.5	18147.5	21516.3	20313.3	22799.4
635.341	20044.5	18158.4	21540.4	20320.7	22862.8
635.841	20080.2	18163.8	21553	20322.1	22917.8
636.341	20122.1	18167.1	21552.5	20325.1	22972.3
636.841	20163.5	18168.9	21541.3	20329.8	23024.5
637.341	20200.9	18167.3	21516	20328.5	23071.1
637.841	20233.8	18166.1	21485.8	20327.7	23106.8
638.34	20257.8	18164.2	21455.7	20329.3	23125.6
638.84	20273.9	18164.8	21422.7	20328	23123.7
639.34	20282.9	18168.9	21387.3	20326.7	23106.3
639.84	20284.3	18175.7	21354.1	20323	23078.5
640.34	20280.5	18182.3	21331	20318.5	23042.2
640.84	20274.7	18187.2	21316.6	20314.5	22996.5
641.34	20268.4	18188.8	21310.8	20311.7	22945
641.84	20261	18187.6	21312	20308.8	22884.6
642.339	20250.9	18188.2	21321.1	20310.1	22818.2
642.839	20237.1	18186.7	21334.3	20313.3	22748.2
643.339	20221.5	18180.7	21352	20318.9	22675.5
643.839	20206.7	18169.9	21374.3	20329.8	22600.6
644.339	20191.9	18157.7	21400.5	20348.8	22513.2
644.839	20178.5	18146.1	21427.7	20379.5	22416.5
645.339	20164.5	18137.7	21456.1	20417.3	22306.2
645.839	20147	18129.4	21487.3	20457.7	22186
646.338	20127.9	18121.4	21522.3	20495.5	22057.1
646.838	20110.4	18111.5	21562.1	20530.6	21920.3
647.338	20095.1	18097.2	21605.2	20562.5	21779.8
647.838	20081.3	18074.3	21649.6	20590.7	21636.7
648.338	20069.2	18042.7	21691.4	20617.4	21488.5
648.838	20059	18005.9	21732.2	20650.6	21333.6
649.338	20050.4	17965	21770.6	20676.1	21174.4
649.838	20047.6	17924.8	21806.6	20695.9	21011.6
650.337	20050.6	17890.5	21839.1	20714.9	20846.1
650.837	20058	17858.5	21867.2	20732.9	20677.3
651.337	20069.8	17829.4	21888.1	20745.6	20507.8
651.837	20087.4	17804.2	21899.5	20756.6	20338.7
652.337	20110.7	17783.3	21904.1	20762.3	20167.3
652.837	20137.2	17767.8	21905.4	20765.7	19988.2
653.337	20162	17757.7	21897.3	20771.8	19814.4
653.837	20182.6	17751.6	21876.7	20773.4	19648.1
654.336	20201.3	17748.4	21844.9	20768.6	19492.5
654.836	20215.8	17744.4	21801.7	20765.8	19349
655.336	20223.3	17743.3	21755.2	20768	19225.3
655.836	20224.7	17747	21711.9	20774.8	19110.5
656.336	20222	17751.4	21671.3	20778.1	19007.6
656.836	20218	17756	21632.5	20783.9	18917.4
657.336	20216.5	17765.3	21598.2	20792.9	18834.3
657.836	20214.7	17779.5	21572.8	20799.6	18765.3
658.335	20211.3	17798.2	21553.2	20801.7	18712.2
658.835	20207.1	17824.2	21537.6	20801.6	18671.2
659.335	20205.1	17857.1	21530.8	20800	18642.7
659.835	20204.1	17894.7	21532.3	20799.1	18625.8
660.335	20200.8	17931.4	21540.5	20803.1	18618.7
660.835	20199.3	17965.2	21559.2	20814.3	18617.2
661.335	20199.6	17996.6	21581.1	20824.3	18610.5
661.835	20200.1	18027.2	21607.4	20838.7	18603.3
662.334	20197.8	18058	21637.9	20861.2	18596.6
662.834	20194.2	18089.3	21671.5	20888.2	18588.2
663.334	20194.1	18119.1	21708.4	20915	18581
663.834	20195.6	18147	21750.6	20943.5	18571
664.334	20202.5	18170.7	21795.2	20970	18555.3
664.834	20215.8	18187.9	21842	20995.8	18538
665.334	20235.3	18196.3	21892.6	21022.8	18520.3
665.834	20256.3	18199.2	21948.7	21051.1	18506.7
666.333	20278.1	18200.8	22012.5	21080.4	18494.1
666.833	20297.9	18203.5	22080.5	21110.7	18484.5
667.333	20315.8	18207.6	22154.3	21141.2	18475.6
667.833	20335.8	18215.4	22231.2	21169.6	18469.7
668.333	20354.8	18227.3	22310.5	21199.3	18466.4
668.833	20372.6	18246.2	22392.3	21224.9	18472.4
669.333	20391.6	18273.1	22476.4	21250.7	18475.4
669.833	20406.3	18308.5	22563.5	21281.3	18476.7
670.332	20418.9	18355	22650.1	21307.6	18474.1
670.832	20429.2	18416.7	22732.6	21328.1	18470.4
671.332	20441.1	18493.1	22811.2	21344.7	18461
671.832	20453.4	18577.2	22888.1	21355.6	18448.3
672.332	20463.9	18668.6	22967.7	21363.7	18439.5
672.832	20474.5	18767.4	23047.6	21365.6	18440.6
673.332	20481.6	18878.7	23125.4	21369.8	18446.3
673.832	20481.2	19001.2	23197.8	21385.5	18455.3
674.331	20477.3	19134.2	23259.4	21404.9	18467.4
674.831	20473.8	19276	23311.6	21424.8	18482.9
675.331	20469.9	19424.9	23357.2	21443.2	18499.6
675.831	20459.7	19580.4	23392.7	21457.8	18512.6
676.331	20445.3	19742.7	23418.5	21467.6	18520.7
676.831	20433.1	19910.1	23435.6	21473	18524.5
677.331	20418.1	20081.4	23455.2	21472.3	18522
677.831	20397.3	20254.7	23473.7	21468.9	18514.6
678.33	20377.2	20430.8	23494.2	21467.6	18500.6
678.83	20361.6	20609.7	23514.3	21466.1	18482.5
679.33	20351.3	20789.8	23531.1	21472.5	18468
679.83	20337.9	20972.3	23542.4	21486.4	18456.5
680.33	20324	21157	23548.9	21501.6	18444.3
680.83	20310.2	21342	23552.9	21525.7	18431.1
681.33	20302.3	21526.3	23562.9	21559	18416.5
681.83	20306.5	21710.5	23586.5	21603	18400.3
682.329	20318.6	21896.8	23616.9	21656.1	18382.5
682.829	20335.6	22085.6	23652.8	21714.6	18360.2
683.329	20354.2	22275.9	23693.4	21782.8	18334.8
683.829	20376.2	22467.5	23736.2	21860.4	18310.4
684.329	20401.9	22662.1	23781.4	21944.6	18293.6
684.829	20432.8	22859.4	23829.6	22027.4	18284.9
685.329	20478.7	23059	23879.4	22116.1	18278.2
685.829	20531.6	23257	23927.7	22210.4	18276.6
686.328	20594	23449.3	23973.4	22312.8	18282.8
686.828	20661.2	23633.8	24017.1	22424.1	18296.1
687.328	20724.4	23807.2	24059.9	22536.5	18316.4
687.828	20779.6	23968.2	24105.2	22649.3	18344.7
688.328	20826	24118	24155.3	22757.1	18377.8
688.828	20861.9	24258	24208.7	22860.5	18416
689.328	20886.3	24389.7	24267.9	22957.8	18459.5
689.828	20901.3	24518.5	24330.2	23043.5	18507.1
690.327	20906.3	24649	24393.2	23119.5	18567.2
690.827	20904.8	24782.2	24455.7	23187.3	18635.7
691.327	20896.7	24919.3	24519.9	23252.6	18705.5
691.827	20884	25058.5	24586.8	23312.1	18773.3
692.327	20874.8	25197.7	24658.1	23368.2	18839.5
692.827	20866.3	25339.7	24736.1	23421.7	18899
693.327	20852.3	25482.9	24823.3	23475.4	18950.3
693.827	20834	25630.5	24921.3	23537.5	18993.2
694.326	20813.6	25779	25030.8	23604.8	19029.6
694.826	20791.5	25926.9	25148	23677	19061
695.326	20765.4	26072.6	25266.8	23753.5	19086.9
695.826	20733.2	26214.2	25384.2	23833	19109.6
696.326	20697.6	26350.9	25501.2	23914.4	19123.2
696.826	20662.7	26481	25628.4	23989.4	19131.6
697.326	20631.6	26601.7	25765.6	24060.6	19133.7
697.826	20599.7	26713.5	25908.2	24131.9	19139.1
698.325	20557.5	26816.4	26056	24206.8	19144.4
698.825	20512.3	26908.4	26205.6	24292.3	19150.1
699.325	20461.6	26989	26357.4	24384.3	19158.1
699.825	20408.8	27057.8	26510.4	24483	19166.1
700.325	20357.5	27114.2	26658.7	24585.4	19172.2
700.825	20305.9	27160.6	26798	24692.2	19173.4
701.325	20260	27198.2	26929	24800.5	19169.3
701.825	20224.6	27230.2	27042.7	24911	19159.6
702.324	20198.6	27257.1	27148.2	25021.2	19138.3
702.824	20187.5	27278.2	27242.6	25130.7	19112.8
703.324	20186.6	27295.4	27326.6	25234.5	19079.7
703.824	20194.8	27306.2	27404.5	25330.6	19037.7
704.324	20207.9	27310.5	27480.5	25417.6	18989.3
704.824	20223.1	27307.6	27557.9	25494.2	18937.7
705.324	20237.2	27296.5	27642.3	25562.1	18886.1
705.824	20249.9	27276.5	27733.9	25623.8	18833.5
706.323	20263.4	27245.9	27830.4	25678.5	18777.8
706.823	20282.9	27200.8	27929.1	25725	18717.3
707.323	20310.9	27142.5	28030.7	25765.2	18655.6
707.823	20350.3	27073.7	28134.3	25802.5	18599.5
708.323	20399.1	26996.6	28241.5	25826.8	18542.5
708.823	20450.1	26916.1	28352.8	25842.3	18489.5
709.323	20501.2	26837	28463.1	25858.8	18443
709.823	20549.5	26757.8	28568.8	25880.3	18393.9
710.322	20595.7	26674.5	28672.7	25905	18345
710.822	20637.9	26584.9	28778.1	25933.2	18297.7
711.322	20676.3	26489	28887.5	25962.4	18255
711.822	20708.7	26387.1	29000.2	25992.3	18212.8
712.322	20730.3	26282.2	29116.1	26018.8	18180.7
712.822	20740.2	26171.2	29234.9	26041.7	18158.5
713.322	20741.4	26047.1	29358.5	26060.2	18140
713.822	20732	25908.4	29481.3	26077.1	18122.2
714.321	20722.5	25753.4	29600.2	26089.3	18108.9
714.821	20706.5	25584.5	29713.5	26098.7	18105.1
715.321	20686.2	25404.1	29824	26103.5	18109.5
715.821	20660.8	25215.9	29934.3	26102.3	18121.9
716.321	20628.7	25019.3	30046.9	26093.8	18138.8
716.821	20589.3	24820.1	30164.1	26077.5	18154.2
717.321	20543.2	24608	30285.6	26054.7	18165.2
717.821	20489.1	24390.4	30409.8	26028.8	18167.1
718.32	20428	24166.1	30535	25996.2	18160.1
718.82	20365.5	23937.5	30659.1	25960.1	18144.5
719.32	20300.3	23698.4	30781.3	25921.8	18125.4
719.82	20235.5	23442.4	30903.1	25880.8	18105.9
720.32	20180.5	23169.4	31026.9	25838.2	18090.5
720.82	20136	22880.1	31152.1	25792.3	18074.4
721.32	20106.1	22582.2	31276	25746.4	18063.1
721.82	20090.2	22283.2	31398.8	25705.6	18058.9
722.319	20088.3	21972.3	31522.1	25670.1	18064.9
722.819	20096.5	21649	31644.4	25634.6	18078.9
723.319	20113	21329.7	31764.9	25603.7	18091
723.819	20132.8	21021.3	31884.5	25583.4	18101
724.319	20154.3	20724.1	32002.1	25571.8	18111.1
724.819	20176.1	20450.8	32116.9	25571.6	18124
725.319	20200.8	20199.8	32229.3	25578.6	18142.3
725.819	20226.3	19984.9	32335.2	25588.1	18159.9
726.318	20257.3	19806.3	32431.1	25593.9	18167.2
726.818	20290.8	19647.5	32516.7	25597.5	18167
727.318	20329	19511.1	32593.3	25596.8	18165.6
727.818	20377.6	19386.7	32659.3	25592.5	18167.5
728.318	20432	19278.6	32711.6	25591.4	18171.2
728.818	20492.4	19179.8	32749.1	25600	18178.2
729.318	20557.5	19090.7	32768.5	25623.5	18182
729.818	20627.5	19012.1	32773.6	25665.6	18187.4
730.317	20700.6	18940.5	32769.4	25727.1	18191.7
730.817	20777	18877	32766.8	25810.6	18194.1
731.317	20855.7	18818.3	32761.2	25920.4	18196.8
731.817	20936.5	18766	32745.6	26043.8	18202.4
732.317	21016.1	18716.1	32722.4	26176.6	18212
732.817	21095.5	18665.4	32694.2	26323.8	18222.3
733.317	21175.1	18617.2	32659.7	26483.6	18232
733.817	21250.7	18567.5	32620.8	26661.2	18241.2
734.316	21319.3	18512.7	32581.6	26852	18253
734.816	21377.8	18457.3	32537.9	27054.5	18270
735.316	21426.1	18400.9	32486.3	27275.4	18284
735.816	21463.6	18343	32429.2	27514.9	18293.7
736.316	21495.4	18286.3	32368.2	27768.4	18304.7
736.816	21521.1	18237.2	32301.8	28034.5	18311.4
737.316	21539.1	18194	32229.4	28318.7	18314.2
737.816	21548.6	18157.5	32146.8	28623	18320.4
738.315	21549.1	18126.2	32052.9	28938.3	18333.8
738.815	21545.8	18096.5	31947.2	29262.1	18342.3
739.315	21538.5	18071.5	31830.5	29588.8	18345.9
739.815	21518.8	18053.7	31697.8	29912.5	18351.4
740.315	21487.6	18041.9	31550	30227.2	18361.5
740.815	21448.6	18043.1	31392.9	30527.3	18372.1
741.315	21412.1	18057.1	31232.1	30808.9	18381
741.815	21382.2	18081.5	31075.8	31069.7	18389.6
742.314	21345.9	18121.4	30922.3	31308.7	18397.5
742.814	21301.8	18173.6	30772.4	31528.7	18405.2
743.314	21248.1	18233.6	30624.1	31733.4	18413
743.814	21188	18300.6	30474.2	31942.1	18421.3
744.314	21124.8	18372.9	30327.8	32153.9	18439.8
744.814	21053.7	18450.8	30174.3	32355.4	18468
745.314	20975.8	18536.6	30013	32552.2	18501.6
745.814	20898.7	18628.4	29840.8	32761	18537.1
746.313	20826.1	18722.6	29657.3	32993.2	18574
746.813	20759.5	18821.5	29465.2	33237.8	18613.4
747.313	20701.3	18923	29271	33484.3	18651.9
747.813	20650.5	19027	29071.6	33737.1	18682.6
748.313	20602.7	19130.2	28870.8	33993.3	18705.5
748.813	20554.7	19234.2	28668.2	34248.7	18723.3
749.313	20509.4	19339.3	28471.5	34501.6	18735.3
749.813	20466.2	19444.8	28282.5	34746.5	18747.3
750.312	20427.8	19549.7	28093.3	34976.3	18748
750.812	20390.7	19653.9	27908.9	35184.9	18746.6
751.312	20352.8	19757.7	27721.9	35366.6	18745.3
751.812	20314.6	19859.5	27538.7	35518.1	18743.1
752.312	20274	19960	27360	35632.2	18734.6
752.812	20233.8	20061.8	27196.6	35712.6	18719.2
753.312	20193.4	20164	27044.5	35779.1	18705.3
753.812	20153.9	20266	26908.2	35834.2	18696.7
754.311	20114.1	20366.6	26783.5	35879.3	18694.4
754.811	20080.1	20463.8	26671.1	35915.8	18690.7
755.311	20045.9	20557.9	26573.4	35945.2	18693.5
755.811	20010	20646.7	26490.7	35968.7	18697.7
756.311	19966.4	20728.1	26409.6	35987.4	18694.4
756.811	19916.6	20801.1	26323.2	36002.2	18687
757.311	19864.8	20862.4	26228.8	36013.9	18681
757.811	19815.2	20912.5	26128	36023.1	18673
758.31	19773.1	20953.5	26024.9	36030.2	18657.6
758.81	19736.4	20985.7	25922.5	36035.6	18637.4
759.31	19700.5	21008.3	25822.8	36039.6	18614.6
759.81	19666.2	21022.3	25723.9	36042.5	18584.7
760.31	19634.8	21030.8	25629	36044.6	18552.3
760.81	19606.6	21035	25538.5	36045.9	18533.4
761.31	19581.2	21031.5	25450	36046.6	18511.6
761.81	19557.1	21020.1	25361.3	36046.8	18496.3
762.309	19536.8	21002.6	25279.8	36046.6	18488.1
762.809	19521.7	20979.6	25197.9	36046.1	18489.7
763.309	19510.4	20948.9	25113.8	36045.3	18496.1
763.809	19502.9	20909.5	25029.6	36044.3	18507
764.309	19497.5	20861.2	24952.8	36043.1	18518.2
764.809	19490.2	20804.8	24880.5	36041.8	18528.9
765.309	19484.3	20736.8	24819.4	36040.4	18537.1
765.809	19484.2	20651.9	24764.7	36038.9	18543
766.308	19487.9	20556.1	24724.1	36037.3	18542.4
766.808	19502.9	20451	24699.4	36035.7	18538.9
767.308	19530.1	20339.1	24694.1	36034	18531.6
767.808	19565.4	20225.8	24700.7	36032.3	18508.6
768.308	19603.7	20118.1	24721.3	36030.5	18479.2
768.808	19646.5	20010.2	24753.9	36028.7	18453.6
769.308	19694.7	19906.8	24795	36026.9	18430.2
769.808	19746.1	19807	24837.5	36025.1	18412
770.307	19799.7	19714	24883.7	36023.2	18405
770.807	19853	19626.8	24927.6	36021.4	18417.4
771.307	19904	19543.6	24976.1	36019.5	18443.7
771.807	19950.6	19466.4	25028.2	36017.6	18485.8
772.307	19993.5	19396	25087.5	36015.7	18537.4
772.807	20032.1	19334	25154.9	36013.9	18588.1
773.307	20065.8	19275.6	25225.4	36012	18642.4
773.807	20095.6	19222.9	25299.6	36010.1	18697.5
774.306	20122.1	19176.7	25371.2	36008.2	18753.5
774.806	20142.8	19137.8	25438.4	36006.3	18807.5
775.306	20160.9	19103.7	25496.5	36004.4	18851.3
775.806	20175.5	19077.2	25544.1	36002.5	18889.6
776.306	20187.4	19058.2	25580.9	36000.6	18920
776.806	20197.5	19049.8	25614.1	35998.7	18942.9
777.306	20205	19046.5	25643.2	35996.8	18957.6
777.806	20206.9	19045.6	25668.9	35994.9	18966.1
778.305	20202.2	19044	25691.1	35992.9	18978.6
778.805	20191.6	19041.8	25703.7	35991	18996.7
779.305	20174.8	19037.9	25705.5	35989.1	19012.6
779.805	20151.5	19028.5	25704.2	35987.2	19023.1
780.305	20124.7	19012.1	25705.8	35985.3	19030.8
780.805	20095.4	18991.1	25704.9	35983.4	19033.4
781.305	20062.7	18963.9	25696	35981.5	19035.3
781.805	20029.7	18933.2	25684.8	35979.6	19035.4
782.304	19998.1	18897.6	25675.5	35977.7	19031.1
782.804	19965.6	18855.7	25666.5	35975.8	19029.1
783.304	19932.7	18804.3	25661.3	35973.9	19034.9
783.804	19898.4	18744.2	25661.8	35972	19045.1
784.304	19864.2	18678.6	25667.4	35970.1	19062
784.804	19831.7	18612	25673.5	35968.1	19075.3
785.304	19796.8	18542.4	25678.9	35966.2	19075.2
785.804	19765.6	18471.1	25685.1	35964.3	19067.9
786.303	19736.2	18401.3	25690.6	35962.4	19058.4
786.803	19711.4	18333.4	25695	35960.5	19043.3
787.303	19692.4	18266.3	25698.7	35958.6	19021.6
787.803	19677	18201.6	25703.2	35956.7	18994.3
788.303	19661.8	18140.1	25707.4	35954.8	18965
788.803	19646	18079	25713.3	35952.9	18933.2
789.303	19628.7	18021.7	25721.8	35950.9	18899.9
789.803	19616.1	17966.8	25728.4	35949	18858.4
790.302	19611.6	17919.2	25733.7	35947	18815.9
790.802	19609.4	17881	25738.1	35944.7	18774.4
791.302	19609	17851.9	25740.8	35942.1	18730
791.802	19614.5	17832.1	25738.5	35938.6	18681.1
792.302	19624.9	17819.3	25732.5	35933.4	18621.1
792.802	19640.7	17810.8	25725.3	35925.1	18566.6
793.302	19657.2	17804.2	25723.2	35911.4	18528.4
793.802	19670	17797.1	25730.8	35889.3	18488.4
794.301	19679.8	17790.3	25746.8	35854.4	18455.3
794.801	19686.7	17783.6	25776.2	35801.7	18433.4
795.301	19692.4	17775.3	25821.4	35725.7	18423.3
795.801	19694.6	17765.9	25876.3	35621.1	18418
796.301	19691.5	17757.9	25941.1	35483.9	18424.6
796.801	19683.7	17749.4	26011.7	35316.6	18438.3
797.301	19673.4	17740.9	26090.8	35136.8	18457.7
797.801	19664.2	17729.9	26175.3	34945.8	18480.4
798.3	19660.6	17713.6	26269.3	34754.5	18505.5
798.8	19657.5	17695.8	26370.2	34571.8	18529.9
799.3	19656.8	17681.1	26479	34398.4	18558.3
799.8	19656.7	17667.2	26595	34234.5	18579.7
800.3	19657.9	17655.7	26719.1	34077.1	18600.2
800.8	19661.1	17648	26848.9	33918.9	18617.7
801.3	19665.9	17643	26983.7	33755.3	18636
801.8	19674.9	17638.4	27121.4	33585.4	18655.1
802.299	19690.8	17631.6	27262.7	33400.7	18671
802.799	19713.2	17620.8	27407.3	33204.6	18685.5
803.299	19736.7	17610.5	27550.5	32997.8	18692.9
803.799	19759.5	17599.8	27689.6	32782.2	18702
804.299	19785.4	17588.7	27821.8	32561.6	18710.5
804.799	19814.2	17575.2	27946.2	32347.3	18719.6
805.299	19847.2	17563.2	28062.7	32147.1	18738.5
805.799	19879.4	17551.8	28175	31966.1	18758.8
806.298	19913.1	17540.1	28282.9	31800.3	18784.4
806.798	19948.1	17530.6	28388.2	31650.2	18818.3
807.298	19983.1	17524.2	28490.3	31513.7	18846.6
807.798	20017	17524.5	28589.4	31389.2	18870.6
808.298	20047.3	17535	28685	31277.8	18886.8
808.798	20071.1	17551.2	28774.9	31178.5	18891.4
809.298	20085.5	17574.5	28857.4	31088	18891.1
809.798	20094.9	17603.5	28934.8	30999.4	18885.9
810.297	20097.4	17637.9	29005.4	30913.2	18872.8
810.797	20089.8	17677.9	29066.6	30825.2	18860.1
811.297	20071.3	17721.6	29118.9	30744.5	18859.8
811.797	20041.9	17764	29161.6	30679.3	18865
812.297	20004.2	17805.2	29197.1	30623.9	18879.5
812.797	19961	17845.5	29225.6	30576.6	18894
813.297	19915	17883.3	29250.1	30538.2	18906.2
813.797	19866.4	17919.8	29269.9	30509.7	18914.9
814.296	19820.9	17956.6	29284.1	30487	18918
814.796	19776.6	17992.4	29290.9	30470	18922.1
815.296	19738.4	18023.3	29290.4	30458.2	18918.3
815.796	19703.9	18051	29285.8	30451.8	18904.7
816.296	19679.5	18074.9	29277.9	30449.8	18885.5
816.796	19671.1	18096.5	29269.1	30451	18861.8
817.296	19675	18115.7	29256.4	30452.9	18843.1
817.796	19689.6	18134	29242.6	30458	18824
818.295	19710.1	18151.5	29226.9	30460.3	18801.8
818.795	19730.2	18168.5	29207.4	30462.9	18785.3
819.295	19747.6	18183.7	29182.4	30457.3	18764.4
819.795	19761.3	18196.3	29150.3	30441.5	18747.5
820.295	19768.5	18203.6	29110.7	30413.1	18747.9
820.795	19771.9	18203.9	29059.1	30376.1	18758.3
821.295	19771.2	18195.5	28998	30330	18774.3
821.795	19764.8	18177.7	28924.6	30277	18793.1
822.294	19758	18155.3	28843.7	30219.1	18817.4
822.794	19750.2	18132.6	28762.5	30164.7	18841.9
823.294	19742.6	18108.4	28685	30111.6	18863.1
823.794	19736	18084.1	28605.2	30059.6	18876.7
824.294	19729	18063.5	28521.2	30000.9	18887.1
824.794	19720.9	18047	28431.5	29931.9	18892.7
825.294	19713.9	18032.3	28338.2	29855.3	18893.2
825.794	19711.8	18018.9	28247.5	29771.9	18890.2
826.293	19710.4	18009.1	28163.3	29680.5	18879
826.793	19706.2	17999.7	28082.1	29582.7	18867.8
827.293	19695.3	17991.4	28000.8	29482.7	18855.4
827.793	19675.5	17986.1	27921.1	29373.7	18851.7
828.293	19649.6	17983.5	27838.4	29256.3	18855.5
828.793	19617.5	17981.7	27751.2	29132.3	18870.6
829.293	19583	17978.6	27666.8	29009.1	18892.5
829.793	19547.9	17973.1	27577.1	28900.3	18913.2
830.292	19513.1	17961.4	27481.9	28798.8	18933.8
830.792	19478.5	17946.1	27377.6	28701.3	18945.8
831.292	19441.8	17925	27275.4	28608.1	18952.6
831.792	19401.1	17900.5	27177	28516.5	18949.9
832.292	19354.5	17873	27083.5	28427.3	18938.2
832.792	19301.3	17847.3	26993.6	28337.5	18917.1
833.292	19243.2	17825.8	26902	28246.9	18884.9
833.792	19181.3	17809.9	26808.1	28157.5	18844.9
834.291	19118.1	17796.1	26720.3	28062	18793.4
834.791	19056.6	17785	26634.4	27954	18734.2
835.291	18994.7	17775.7	26547.3	27837.2	18668.5
835.791	18934.7	17765.2	26465.5	27713.6	18604.8
836.291	18876.8	17748.6	26395.3	27590.5	18551.5
836.791	18821	17727.7	26331.8	27466	18512.1
837.291	18767.3	17702.8	26268.1	27341.4	18484.2
837.791	18720	17676.5	26212.1	27212.4	18461.3
838.29	18686.3	17648.2	26162.9	27076.1	18450.6
838.79	18662.8	17620.6	26120.2	26934	18453
839.29	18648.6	17591.1	26085.4	26792.9	18474.8
839.79	18644.1	17559.3	26056.4	26651.4	18497.2
840.29	18642.5	17530.1	26031.6	26516.2	18515.2
840.79	18640.7	17504.6	26005	26387.4	18530.4
841.29	18636.9	17484.7	25976	26267.2	18539.5
841.79	18630.3	17469.8	25943.9	26154.2	18544.6
842.289	18618.2	17455.1	25901.9	26037.3	18544.4
842.789	18602	17444.9	25854.1	25909.7	18540
843.289	18582.9	17435.9	25803	25786	18538.5
843.789	18561.9	17432	25749	25669.5	18540.7
844.289	18546.7	17432.5	25696.4	25550.2	18545.1
844.789	18541.1	17434.4	25647.6	25435	18556.5
845.289	18546.7	17434.9	25606.1	25322.6	18585.1
845.789	18563.5	17434.7	25562.5	25220.8	18612.2
846.288	18588.6	17431.1	25517.5	25125.4	18648.7
846.788	18619.2	17426.5	25472.3	25032.9	18695.8
847.288	18656.8	17418.1	25433.3	24942.3	18747.4
847.788	18700.6	17406.4	25396.8	24856.8	18802.7
848.288	18745.4	17392.2	25357.1	24774.1	18861.6
848.788	18786	17377.7	25321.1	24690.4	18911.3
849.288	18820.5	17362.6	25281.2	24613.9	18952.2
849.788	18847.1	17344.4	25234.1	24539.7	18983.2
850.287	18867.2	17327.2	25179	24456.6	19002.3
850.787	18884.3	17310.3	25120.4	24365.4	19020.2
851.287	18899.7	17299.7	25064.8	24265.3	19047.6
851.787	18919.5	17291.3	25002.8	24156.4	19080.7
852.287	18943.5	17285.2	24940.6	24051.6	19103.2
852.787	18971.4	17284.3	24875.5	23958.3	19116.7
853.287	18999.1	17282.9	24810.6	23863.5	19125
853.787	19025.8	17279.8	24737	23769.5	19128.3
854.286	19053.1	17273.4	24656.2	23676.4	19129.9
854.786	19079.8	17264.8	24567.2	23586.7	19125.5
855.286	19101.2	17254.8	24478.9	23496.8	19107.7
855.786	19120.4	17244.1	24397.4	23408.9	19075.8
856.286	19135.3	17237	24327.3	23327.2	19036.6
856.786	19147.9	17230.5	24262	23251.1	19003.2
857.286	19157.4	17226.4	24201.8	23178.7	18980.4
857.786	19163.7	17223.1	24148.3	23113.7	18958.3
858.285	19171.7	17219	24101.3	23058.9	18935.6
858.785	19184.6	17214.8	24060.6	23012.7	18918.5
859.285	19198.9	17210.7	24026	22978	18904.5
859.785	19213	17206.6	23987.8	22956.3	18885.6
860.285	19223.5	17204.9	23948.9	22951	18866.6
860.785	19230.2	17206.5	23908.4	22958.1	18850.4
861.285	19235	17212.4	23864.6	22965.6	18830.9
861.785	19241	17224.4	23817	22975.9	18806.9
862.284	19244.4	17243.5	23766	22987.8	18784.7
862.784	19245.1	17270.6	23711.3	23002.7	18767.9
863.284	19244.9	17305.6	23646.7	23017.5	18748.6
863.784	19243.6	17347.2	23576.2	23030.5	18730.5
864.284	19245.4	17395.3	23508.9	23044.1	18719.3
864.784	19251.8	17448	23439.6	23058.8	18710.4
865.284	19263.8	17502.5	23370.3	23078.3	18697
865.784	19283.8	17558	23298.3	23101.1	18675.9
866.283	19307.2	17612.4	23228.6	23122.3	18648.4
866.783	19331.8	17663.9	23155.2	23143.2	18610.6
867.283	19356.1	17710.7	23085.3	23164.1	18563.5
867.783	19379.6	17752.1	23021.1	23184.6	18514.2
868.283	19403.9	17788.7	22964.8	23195.6	18471.9
868.783	19428.9	17820.2	22912.6	23196	18431.6
869.283	19456	17850.8	22863.1	23185	18402.9
869.783	19484.9	17881.1	22815.5	23164.7	18385.7
870.282	19514.9	17905.9	22774.6	23135.7	18375.8
870.782	19546.8	17921	22743.5	23097.3	18373.1
871.282	19581.8	17926.8	22721.9	23057.8	18377.4
871.782	19621.8	17926.8	22704.5	23016.8	18383.9
872.282	19666.3	17920.5	22690.1	22975	18399.1
872.782	19714.6	17909.4	22679.2	22925	18417
873.282	19768.3	17891.8	22669.2	22870.1	18427.8
873.782	19825.3	17869.8	22662.4	22814.9	18435.5
874.281	19883.4	17843.4	22651.1	22761.2	18440.2
874.781	19939.1	17817.3	22636.2	22713.2	18441.4
875.281	19991.7	17792.3	22619.6	22665.7	18443.4
875.781	20042.5	17773	22600.1	22629.5	18442.3
876.281	20089.3	17759.8	22584	22609	18434.3
876.781	20130.9	17746.8	22565.2	22594.4	18425.6
877.281	20164.9	17733.6	22546.2	22587	18422.8
877.781	20190.4	17720.7	22527.3	22586.2	18430
878.28	20205.5	17709.3	22505.7	22594.5	18438.2
878.78	20210.2	17702.7	22479	22600.4	18455
879.28	20207.9	17697.7	22452.7	22603.1	18477.3
879.78	20198.6	17693.3	22423.6	22601.1	18506
880.28	20177.9	17687	22387.6	22593.6	18538.2
880.78	20146	17678.1	22351.6	22583.5	18574.3
881.28	20106.3	17664	22319.6	22575.5	18608.7
881.78	20059.7	17647.1	22293.9	22571.6	18646.5
882.279	20006.9	17630.8	22274.3	22575.2	18681.8
882.779	19947.1	17617.2	22251.8	22585.3	18718.8
883.279	19887.1	17607	22230.5	22597.2	18754
883.779	19825.1	17599.2	22210.5	22603.9	18786.9
884.279	19768.4	17591.1	22192.4	22603.9	18820.5
884.779	19716.6	17586.1	22174.7	22595.6	18852.4
885.279	19670.7	17583.6	22160.6	22582.6	18880.6
885.779	19628.3	17583.7	22150	22565.1	18908.4
886.278	19589.6	17587.6	22143.3	22538.4	18929.2
886.778	19552.4	17595.7	22138.4	22503	18950.4
887.278	19517.7	17608.3	22137.4	22463	18980.1
887.778	19486.7	17626	22137.7	22422.7	19020.5
888.278	19459.7	17651.4	22143.9	22383.3	19053.1
888.778	19439.9	17681.4	22155.2	22345	19071.4
889.278	19428.4	17712.1	22175.1	22312.1	19075.7
889.778	19424.9	17741.2	22203.8	22275.5	19069.8
890.277	19429.2	17771.8	22235.3	22233.8	19059.4
890.777	19435.7	17802.1	22265.3	22192	19051.1
891.277	19440.8	17832.7	22290.7	22148.3	19047.8
891.777	19442.4	17864.3	22308.2	22105.1	19043.7
892.277	19440.7	17896.3	22319.5	22060.5	19036.4
892.777	19438.4	17925.6	22328.1	22015.3	19023.2
893.277	19436.2	17950.8	22329.4	21974.4	19004.3
893.777	19433.6	17971.6	22328.2	21943.9	18970.6
894.276	19432.6	17989.6	22322.2	21920	18931.7
894.776	19430.2	18006.4	22308.7	21905.5	18886.7
895.276	19427.1	18020.9	22292.4	21896.7	18838.9
895.776	19422.1	18035	22277.7	21893.2	18789.3
896.276	19414.6	18051.5	22267.7	21896.1	18736.9
896.776	19404.8	18069.5	22252.5	21903.9	18685.1
897.276	19399.6	18087.2	22241.7	21923.2	18633
897.776	19398	18104.8	22233.9	21949.1	18585.1
898.275	19401.7	18119	22229	21978.7	18546.6
898.775	19411.3	18129.3	22223.2	22007.2	18520.5
899.275	19424.8	18142.6	22217.5	22029.8	18505.5
899.775	19439	18155.6	22209.9	22049	18499.8
900.275	19453.9	18165.8	22200.9	22059.5	18507.3
900.775	19469	18172.6	22194.1	22063.3	18523.6
901.275	19482.9	18176.8	22186.9	22059.3	18546.4
901.775	19495.8	18180.1	22179.4	22045.3	18576.3
902.274	19508.6	18183.4	22174.4	22023.5	18609.4
902.774	19516.3	18185.1	22173.6	21995.4	18644.5
903.274	19519.8	18186.3	22178.2	21966.8	18676.1
903.774	19525.9	18187.9	22190	21938.4	18700.1
904.274	19531.6	18190.8	22212.5	21910.4	18718.5
904.774	19536.3	18197.8	22243.2	21888.1	18731.2
905.274	19539.3	18205	22275.9	21873.1	18746.9
905.774	19541.2	18211.6	22308.2	21863.1	18755.6
906.273	19541.9	18216.6	22335.6	21855.8	18762.3
906.773	19536.6	18217.6	22356.8	21846.8	18765.4
907.273	19530.9	18217.9	22373	21838.1	18755.4
907.773	19521.7	18217.8	22384.4	21822.8	18741.6
908.273	19511.1	18215.4	22393	21798.4	18727.5
908.773	19501.2	18216.5	22402.4	21778.4	18709.4
909.273	19491.9	18220.9	22409.6	21764.6	18682
909.773	19483.3	18223.9	22418.9	21757.5	18655.7
910.272	19475.9	18223.6	22426.4	21751.9	18633
910.772	19468.8	18217.9	22433.1	21751.6	18607.3
911.272	19463.4	18207.6	22440.9	21762.4	18585.7
911.772	19459.4	18191.5	22445.8	21782.6	18574.5
912.272	19456.8	18171.5	22450.2	21805.7	18561.4
912.772	19454	18151.6	22452	21833.7	18549.9
913.272	19451.6	18134.1	22453.5	21867.4	18536
913.772	19452	18120.2	22462.4	21908.9	18523
914.271	19455.9	18109	22478.7	21956.8	18508.3
914.771	19465	18098	22498.8	22006.9	18492.8
915.271	19479.3	18087.6	22522.1	22064	18474.5
915.771	19498.5	18078.1	22543.3	22125.6	18465.3
916.271	19520.6	18071.3	22573.3	22192.7	18453.4
916.771	19543.6	18065.7	22601.7	22266	18447.1
917.271	19564.1	18061.6	22630	22344.6	18443.1
917.771	19583.6	18061.5	22657.1	22420.7	18450.5
918.27	19598.9	18066.7	22681.5	22489.8	18460.8
918.77	19609.7	18075.8	22697.2	22552.5	18475.6
919.27	19614	18085.2	22704.8	22609.1	18500.8
919.77	19611.2	18092.4	22704.3	22657.3	18529.4
920.27	19601.8	18094.9	22690.4	22700.2	18556.5
920.77	19589.1	18087.8	22667.3	22738.5	18578.6
921.27	19575.1	18073.5	22633.6	22771.1	18589.5
921.77	19563.6	18056.3	22592.4	22797.1	18597.7
922.269	19551.7	18039.3	22551.1	22823.7	18610.2
922.769	19542.3	18025.5	22511.7	22847.2	18612.9
923.269	19531	18014	22475.8	22865.7	18612.9
923.769	19518.2	18000.7	22444.1	22877.1	18610.1
924.269	19502.7	17985.1	22406.6	22890.2	18603.5
924.769	19485.8	17965.1	22364.9	22907.5	18590.2
925.269	19467.8	17941.9	22319.8	22922	18572.4
925.769	19450.9	17922.5	22280.8	22934	18561.9
926.268	19434.1	17909.4	22240.1	22950.8	18559.2
926.768	19414.8	17906.5	22205.1	22970.8	18555.4
927.268	19397.3	17912	22171.3	22993.2	18548.9
927.768	19380.7	17921.5	22137.3	23010.9	18546.2
928.268	19361.5	17930	22099.8	23024.9	18551.8
928.768	19346.4	17934.9	22057.9	23037.2	18568
929.268	19332.2	17938.3	22016.8	23045.8	18581.7
929.768	19317.6	17941.3	21978.9	23051.7	18597.8
930.267	19303.5	17947.2	21936.8	23051.7	18615.4
930.767	19289.1	17957.1	21898.4	23052	18633.4
931.267	19277.3	17970.5	21868.1	23057.5	18658.2
931.767	19263.9	17985.9	21844.7	23068.6	18682.9
932.267	19250.8	18003.2	21829.2	23089.4	18710.8
932.767	19235.1	18023.2	21822.1	23115.2	18741.9
933.267	19219.2	18046.8	21821	23144.1	18765.9
933.767	19201.2	18072.7	21827.3	23174.1	18796.1
934.266	19183.2	18097.5	21839.8	23200.8	18828.5
934.766	19162.6	18126.1	21858.8	23226.1	18854.6
935.266	19138.4	18157.5	21882.7	23249.3	18881.2
935.766	19114.2	18192.4	21912.3	23272.2	18911.5
936.266	19087.7	18230.8	21945.4	23295.4	18940.4
936.766	19062.6	18271.7	21979.5	23318.5	18962
937.266	19040.9	18316.5	22012.3	23344.3	18976.9
937.766	19023.7	18366.2	22046.1	23371	18995.2
938.265	19011.3	18412.2	22084.7	23397.7	19010
938.765	19006.4	18453.6	22123.8	23425.5	19020.8
939.265	19008.8	18489.7	22162	23450.4	19031.5
939.765	19019.6	18519	22196.1	23471.2	19031.8
940.265	19031.8	18541.5	22219.1	23487.2	19024.9
940.765	19050	18557.2	22230.9	23496.7	19009.6
941.265	19074.4	18566.3	22234.7	23505	18982.9
941.765	19102.6	18568.3	22234	23516.8	18950.8
942.264	19135.2	18562.8	22227.4	23531.4	18920.4
942.764	19176.5	18550.1	22212.6	23551.8	18893.8
943.264	19227.9	18531.2	22195.1	23573.5	18867.2
943.764	19292.7	18508.7	22174.4	23590.4	18842.2
944.264	19371.8	18481.7	22157.8	23601.4	18817.6
944.764	19466.8	18448.7	22145.2	23600.7	18793.5
945.264	19577.9	18410.4	22128.3	23586.3	18762.4
945.764	19713.1	18367.3	22109.2	23557.8	18723.6
946.263	19869.9	18322.2	22092.2	23520.8	18677.9
946.763	20045.1	18280.8	22079.2	23476.1	18629.2
947.263	20231.8	18243.3	22065.1	23421.2	18572.5
947.763	20430.9	18213	22050.9	23358	18521.5
948.263	20639.1	18192.7	22045.9	23294.6	18475.2
948.763	20854.4	18185.1	22041.1	23224.1	18427.3
949.263	21075.6	18189.9	22044.4	23153.3	18389.3
949.763	21299.7	18208.6	22053.9	23097.5	18362.6
950.262	21526	18233.6	22067.4	23055.5	18328.3
950.762	21755.2	18259.5	22085.6	23014.3	18299.4
951.262	21985.6	18287.7	22107	22977.5	18269.6
951.762	22215.4	18317.6	22133.1	22946	18238.9
952.262	22442	18346.8	22164.3	22916.1	18210.1
952.762	22661.6	18376.8	22195.2	22893.6	18181.1
953.262	22874.4	18408.8	22224.9	22877.2	18153.4
953.762	23083.5	18442.3	22248.4	22866.1	18121.2
954.261	23288.8	18474.8	22263.9	22860.8	18091.9
954.761	23491.8	18506.4	22272.6	22858.8	18070.6
955.261	23688.4	18536.2	22272.8	22851.3	18048.8
955.761	23872.7	18562.7	22261.4	22834.5	18028.7
956.261	24042.2	18587.2	22247.3	22812.2	18005.9
956.761	24196.8	18609.2	22235	22785.4	17987.8
957.261	24338.7	18628.9	22223.6	22757.3	17971.7
957.761	24468.6	18643.3	22219	22732.8	17951.5
958.26	24590.3	18654.4	22224.2	22706	17937.4
958.76	24706.5	18664.2	22235.8	22676.3	17923.6
959.26	24814.3	18670.1	22251.2	22645	17913.3
959.76	24913.3	18673.5	22270.1	22616.5	17901
960.26	25005.7	18674.2	22287.5	22584.6	17902.7
960.76	25095	18674.1	22303.6	22550.7	17915.4
961.26	25181.9	18672.6	22319	22519.1	17938.5
961.76	25264.6	18668.2	22332.6	22483.6	17964.8
962.259	25349.7	18658.1	22349.1	22448.9	17998.3
962.759	25428.6	18643.5	22369.5	22416.4	18033.9
963.259	25503.9	18622.7	22393.8	22385.9	18067.9
963.759	25575.6	18596.9	22417.8	22357.9	18093.3
964.259	25639.1	18567.1	22442.6	22333.6	18117.6
964.759	25696.4	18535.9	22464.3	22311.7	18136.4
965.259	25746.9	18503.2	22475.9	22286.2	18149.1
965.759	25789.7	18473.4	22475.5	22257	18164.2
966.258	25824.6	18443.8	22465.4	22231.6	18180.5
966.758	25854	18417.9	22449.4	22206.4	18190
967.258	25878	18393.5	22428.2	22176.6	18191.2
967.758	25898.5	18373.2	22405.2	22145.2	18177.7
968.258	25916.4	18355.9	22385.9	22111.4	18151.5
968.758	25934.4	18342.2	22377.8	22075.2	18114.1
969.258	25951.8	18332.8	22377.3	22036.1	18079.1
969.758	25967.9	18330.8	22382.1	21989.7	18051.7
970.257	25983	18334.7	22383.1	21945.8	18021.7
970.757	25998.8	18341.7	22381.5	21909.9	18002.4
971.257	26013.5	18347.9	22374.4	21873.1	17987.8
971.757	26024.2	18356.5	22368.6	21839.2	17975
972.257	26028.8	18365.4	22354.6	21812.1	17963.5
972.757	26026.5	18376.1	22339.2	21797.3	17956.9
973.257	26016.2	18388.8	22319.7	21790.1	17956.5
973.757	25998.3	18404.4	22305.1	21789.3	17960
974.256	25973.7	18421.8	22296.7	21790.3	17964.1
974.756	25944.1	18437.1	22284.7	21794.5	17971
975.256	25911.2	18449.7	22267.8	21796.9	17974.2
975.756	25877.9	18458.6	22244.5	21794.9	17979.7
976.256	25847	18465.7	22219.5	21786.7	17987.4
976.756	25815.8	18467.9	22192	21779	18000.3
977.256	25788.5	18467.7	22167.1	21770.7	18018.1
977.756	25762.7	18467.6	22142.1	21756.3	18039.9
978.255	25735.7	18467.4	22125.2	21733.8	18063
978.755	25702.9	18467.5	22113.6	21707.2	18086
979.255	25662	18464.5	22105.2	21681.4	18109.9
979.755	25612.5	18460	22099.3	21654.2	18131.2
980.255	25554.1	18454.1	22094	21632.6	18158.7
980.755	25483.7	18447.4	22089.9	21615.1	18193.8
981.255	25401.7	18440.3	22092.2	21611.8	18228.5
981.755	25307.2	18435.2	22094.2	21625.4	18260.7
982.254	25198.2	18432	22093.6	21645.6	18291.9
982.754	25069.3	18429.1	22088.4	21667.8	18323.7
983.254	24926.1	18428.6	22078.2	21694.4	18348
983.754	24769.4	18428	22059	21721	18360.7
984.254	24604.1	18427.2	22036.8	21746.5	18362.6
984.754	24426.9	18426.1	22008.7	21765.3	18354.8
985.254	24244.4	18423.3	21983.6	21779.8	18336.8
985.754	24061.1	18418.2	21965.2	21793.3	18321.2
986.253	23881.4	18411.4	21951.7	21814.7	18312.5
986.753	23707.4	18404.2	21941.5	21845.4	18301
987.253	23545.1	18395.1	21937.4	21878.8	18295.5
987.753	23389.4	18385.5	21942.4	21916	18294.4
988.253	23242.5	18370.8	21950	21957.9	18302.3
988.753	23103.5	18350.6	21956.4	22000.3	18309.4
989.253	22970.5	18325.4	21959.1	22041.7	18324.5
989.753	22845.4	18293.8	21955.9	22081.1	18349.9
990.252	22719.5	18255.9	21948.5	22118.9	18375.7
990.752	22591.6	18210.8	21939.9	22158.5	18405.2
991.252	22461.4	18158.3	21932.9	22200.8	18444.2
991.752	22328.7	18100.2	21932	22245	18489.6
992.252	22193.5	18039.6	21934.9	22287.8	18534
992.752	22053.2	17978.3	21938.3	22331.1	18583.5
993.252	21906.2	17914.4	21939.6	22377.7	18638.9
993.752	21754.7	17848.2	21937.7	22420.4	18698.3
994.251	21604.9	17779.3	21937.5	22461	18763.4
994.751	21456.8	17712.2	21944.5	22499.1	18834.1
995.251	21312.5	17649.2	21954.8	22539.5	18898.6
995.751	21176.3	17591	21965.8	22581.7	18946.5
996.251	21055.5	17541.8	21976.3	22621.3	18976
996.751	20942.8	17499.3	21988.8	22657.7	18989
997.251	20834.4	17464.9	22001.7	22687.3	18988.5
997.751	20732	17439	22015.1	22707.4	18982.3
[truncated: 6,004 more rows]
