# Supplementary material for: Ionogel thin films as a compatibilizing pretreatment for electrospray deposition
Source: Royal Society of Chemistry journal article supplement (doi:10.1039/d5lp00359h), 2026-01-01
Supplement: d5lp00359h1.zip [file Porous F data - aligned.xlsx]

## Sheet: Sheet1
Lateral	Height Data	Height Data	Height Data	Height Data	Height Data
µm	µm	µm	µm	µm	µm
	F1	F2	F3	F4	F5
0	0.00282307	-0.0171957	0.0172524	-0.004448	0.0180692
0.499875	0.00274099	-0.0174124	0.0163916	-0.00541503	0.0185043
0.99975	0.00297041	-0.0173555	0.0152226	-0.00628016	0.018128
1.49963	0.00288645	-0.0176503	0.0142389	-0.00698189	0.0178776
1.9995	0.00310181	-0.0178004	0.0131999	-0.00746663	0.0167324
2.49938	0.00336454	-0.0180394	0.0122336	-0.00769782	0.0156833
2.99925	0.00340343	-0.0179792	0.0109688	-0.0076616	0.0157798
3.49913	0.00307532	-0.0181097	0.0104156	-0.0083745	0.0160469
3.999	0.00288803	-0.0180597	0.00958281	-0.00784796	0.0154423
4.49888	0.00274456	-0.018078	0.00881799	-0.00706247	0.0139406
4.99875	0.00316665	-0.017922	0.00773275	-0.00807261	0.0136062
5.49863	0.00303062	-0.0182271	0.00694615	-0.00889589	0.0135403
5.9985	0.00319376	-0.0181249	0.00596499	-0.00843012	0.013765
6.49838	0.00303926	-0.0182296	0.00490666	-0.00761253	0.0142715
6.99825	0.00319472	-0.0183001	0.00402445	-0.00647523	0.0140118
7.49813	0.00305027	-0.0183347	0.00344406	-0.00710174	0.0149335
7.998	0.00336442	-0.0183367	0.00239069	-0.00555727	0.0139907
8.49788	0.00327581	-0.018441	0.00158132	-0.00585752	0.014107
8.99775	0.00390956	-0.0184085	0	-0.00611161	0.0132945
9.49763	0.00389324	-0.0187512	-0.00111173	-0.00631474	0.0135343
9.9975	0.00420217	-0.018981	-0.00209843	-0.00747206	0.0128524
10.4974	0.0042134	-0.019089	-0.00345906	-0.00656509	0.0122475
10.9973	0.00466589	-0.0193243	-0.00456061	-0.0075738	0.0107801
11.4971	0.00480048	-0.0196877	-0.00612926	-0.0075598	0.0105279
11.997	0.00496182	-0.0200413	-0.00701664	-0.00849004	0.0115902
12.4969	0.00501226	-0.0203623	-0.00781386	-0.00936802	0.0119444
12.9968	0.00494187	-0.0203774	-0.00890991	-0.0101369	0.0124929
13.4966	0.00475281	-0.0203227	-0.00969275	-0.0107456	0.0121741
13.9965	0.00471089	-0.0204573	-0.0106666	-0.0101504	0.0109357
14.4964	0.00458531	-0.020541	-0.0121031	-0.0103485	0.0108122
14.9963	0.00476305	-0.0207006	-0.0126206	-0.0114004	0.0108771
15.4961	0.0046228	-0.0205634	-0.0138347	-0.0112956	0.0111338
15.996	0.00490666	-0.0207616	-0.0147723	-0.0120012	0.0105626
16.4959	0.00498904	-0.0206845	-0.0158003	-0.0115334	0.0111519
16.9958	0.00485017	-0.0209578	-0.017052	-0.0118837	0.0109093
17.4956	0.00461638	-0.0210859	-0.0180263	-0.012088	0.00977865
17.9955	0.00443323	-0.0213043	-0.0188423	-0.0121194	0.0107775
18.4954	0.00457829	-0.0212259	-0.0200201	-0.0129548	0.00991775
18.9953	0.00481665	-0.0214675	-0.0212088	-0.0135619	0.010122
19.4951	0.00513899	-0.0212788	-0.0225383	-0.0128665	0.00940187
19.995	0.00502335	-0.0212767	-0.023633	-0.0118467	0.00873116
20.4949	0.00533076	-0.0213498	-0.0248632	-0.0105701	0.00814986
20.9948	0.00506183	-0.0213719	-0.0263584	-0.0111293	0.00770208
21.4946	0.00521072	-0.0213372	-0.0276034	-0.0115724	0.00742588
21.9945	0.00529845	-0.0213685	-0.0289453	-0.0128221	0.00633322
22.4944	0.00532353	-0.0212132	-0.0302438	-0.0117702	0.00642965
22.9943	0.00541433	-0.0212447	-0.0311032	-0.010306	0.00773619
23.4941	0.00557456	-0.021091	-0.032271	-0.00948095	0.00816994
23.994	0.00567325	-0.0209971	-0.0332664	-0.00937554	0.0055871
24.4939	0.00594931	-0.0209674	-0.0343457	-0.00802254	0.00498703
24.9938	0.00588685	-0.0208769	-0.0353975	-0.00745099	0.00352003
25.4936	0.00596815	-0.0208509	-0.036679	-0.00776484	0.00424771
25.9935	0.00581778	-0.0206455	-0.0380669	-0.00700537	0.00423201
26.4934	0.0058111	-0.0203951	-0.0390423	-0.00719319	0.00441523
26.9933	0.00545891	-0.0202472	-0.0400903	-0.00739848	0.0037774
27.4931	0.0057769	-0.0206006	-0.040969	-0.00763254	0.00330603
27.993	0.00553147	-0.0207057	-0.0423161	-0.00890609	0.00303395
28.4929	0.00571266	-0.0209107	-0.043394	-0.0102016	0.00297256
28.9928	0.0057053	-0.0208226	-0.0445717	-0.00941698	0.00411365
29.4926	0.00574607	-0.0209262	-0.0453562	-0.010487	0.00339559
29.9925	0.00583079	-0.0205937	-0.0468885	-0.0114196	0.00272157
30.4924	0.00570025	-0.0208275	-0.0479377	-0.0121021	0.0031209
30.9923	0.00559915	-0.0206429	-0.049492	-0.0114273	0.0015999
31.4921	0.00566301	-0.0206599	-0.0505524	-0.0113455	0.00115531
31.992	0.00552357	-0.0205184	-0.0518512	-0.00988538	0.00088729
32.4919	0.0055618	-0.0208538	-0.0531415	-0.00908205	0.00083195
32.9918	0.00541806	-0.0206715	-0.0544087	-0.00904751	0.00101349
33.4916	0.00560499	-0.0209628	-0.0556348	-0.00882939	0.00043559
33.9915	0.00588989	-0.0208609	-0.0569272	-0.00841516	0.00111185
34.4914	0.00576483	-0.0209788	-0.0578919	-0.00879269	0.00107449
34.9913	0.00610189	-0.0211965	-0.0587653	-0.00791924	0.00129423
35.4911	0.00628404	-0.0212501	-0.0598106	-0.00771454	0.00177521
35.991	0.00667021	-0.0213721	-0.0607968	-0.00714308	0.00148316
36.4909	0.0067464	-0.0213013	-0.0616108	-0.00511305	0.00237201
36.9908	0.00686909	-0.0211501	-0.062648	-0.00457834	0.00340496
37.4906	0.00678536	-0.0209168	-0.063806	-0.00353712	0.00245372
37.9905	0.00699456	-0.0211082	-0.0650858	-0.00088749	0.00142563
38.4904	0.00724986	-0.0211007	-0.0664754	0.0014195	0.00137134
38.9903	0.00728302	-0.0207515	-0.0674494	0.00436152	0.00034376
39.4901	0.00707612	-0.0203161	-0.0684895	0.00593303	-0.00062149
39.99	0.00713264	-0.0202023	-0.0692293	0.00812988	-0.00141718
40.4899	0.00696456	-0.0200646	-0.0703116	0.012026	-0.0019459
40.9898	0.00707748	-0.0202879	-0.0715167	0.0156118	-0.00113952
41.4896	0.00685888	-0.0203702	-0.0727246	0.0187697	0
41.9895	0.00681428	-0.0204142	-0.0739292	0.0224131	0.00035313
42.4894	0.00683974	-0.0201551	-0.0753722	0.0244758	-0.00022453
42.9893	0.00706868	-0.0202169	-0.076409	0.0269164	-0.00081523
43.4891	0.00712168	-0.0201122	-0.0773873	0.0298065	-0.00144097
43.989	0.00723375	-0.0199657	-0.0784278	0.0321974	-0.00211426
44.4889	0.00727097	-0.0199149	-0.0796521	0.0351276	-0.00384136
44.9888	0.00721996	-0.0202257	-0.080545	0.0386456	-0.0045899
45.4886	0.00719782	-0.0201479	-0.0814636	0.0427356	-0.00527207
45.9885	0.00745419	-0.0204225	-0.082286	0.0452971	-0.00584541
46.4884	0.00723117	-0.0203055	-0.0830192	0.0481959	-0.00726143
46.9883	0.00689414	-0.0202931	-0.0839328	0.051356	-0.0074397
47.4881	0.00684542	-0.02053	-0.0845472	0.0536473	-0.00827254
47.988	0.00673853	-0.0210256	-0.0856315	0.0539096	-0.00771523
48.4879	0.00696221	-0.0208885	-0.086835	0.0560711	-0.00672726
48.9878	0.00714889	-0.021228	-0.0878981	0.056119	-0.00537709
49.4876	0.00728525	-0.0213016	-0.0886785	0.0559513	-0.00578663
49.9875	0.00723385	-0.021972	-0.0899264	0.0555794	-0.00505541
50.4874	0.0072379	-0.0210915	-0.090897	0.0560183	-0.00518957
50.9873	0.00729742	-0.0225268	-0.0918255	0.0542467	-0.00623348
51.4871	0.00752978	-0.0212904	-0.0928417	0.053221	-0.00613862
51.987	0.00766625	-0.0222076	-0.093954	0.0519942	-0.00581424
52.4869	0.00755254	-0.0218308	-0.0949147	0.0505552	-0.00524175
52.9868	0.00716999	-0.0216156	-0.0961015	0.0488907	-0.00543314
53.4866	0.00702413	-0.02197	-0.0970202	0.0469913	-0.00541196
53.9865	0.00675616	-0.0212716	-0.0982949	0.0438503	-0.00416574
54.4864	0.00662179	-0.022273	-0.0991756	0.0425041	-0.00372957
54.9863	0.00637996	-0.0212361	-0.100523	0.0400172	-0.00419664
55.4861	0.00641199	-0.0218776	-0.101702	0.0373602	-0.00457838
55.986	0.00597377	-0.0216158	-0.102804	0.0345655	-0.00481564
56.4859	0.00594666	-0.0215405	-0.103551	0.0326722	-0.00484344
56.9858	0.0054798	-0.0216665	-0.104184	0.0307017	-0.00460278
57.4856	0.00571227	-0.0211119	-0.105096	0.028625	-0.00405212
57.9855	0.00566374	-0.0220069	-0.105682	0.025429	-0.00317492
58.4854	0.00581601	-0.0208488	-0.106833	0.0221487	-0.00298858
58.9853	0.00590948	-0.0217331	-0.107569	0.0209172	-0.00151066
59.4851	0.00579659	-0.0209446	-0.108765	0.017827	-0.00175141
59.985	0.00596684	-0.0211927	-0.109183	0.0168887	-0.00075663
60.4849	0.00566624	-0.0207595	-0.110454	0.0161688	-0.00049729
60.9848	0.00551412	-0.0207618	-0.11161	0.0145767	-7.1e-06
61.4846	0.00527971	-0.0208514	-0.11263	0.0130136	0.00172316
61.9845	0.00547632	-0.0204027	-0.113755	0.011431	0.0016515
62.4844	0.00560902	-0.0204285	-0.1146	0.00978995	0.00169548
62.9843	0.00565651	-0.0205898	-0.116164	0.00807918	0.00187673
63.4841	0.0054771	-0.0205137	-0.116817	0.00532017	0.00220198
63.984	0.00518989	-0.0214538	-0.117912	0.00258971	0.00266221
64.4839	0.00493035	-0.0202616	-0.118855	0.00205836	0.00323818
64.9838	0.00521776	-0.0220433	-0.119776	0.00085188	0.00290144
65.4836	0.00505386	-0.0208168	-0.121196	0.00098086	0.00163457
65.9835	0.00517137	-0.0221341	-0.122245	0.0004649	0.00149623
66.4834	0.00482328	-0.0210284	-0.123531	0.0002635	0.0025716
66.9833	0.00463519	-0.021701	-0.124799	0.00038721	0.00283087
67.4831	0.00450739	-0.021074	-0.125648	-0.00015923	0.00216862
67.983	0.00482993	-0.0212478	-0.127062	-0.00035209	0.00255207
68.4829	0.00472186	-0.0216329	-0.127782	-0.00011542	0.00199041
68.9828	0.00490799	-0.0212089	-0.129033	0.00161294	0.0004626
69.4826	0.0047522	-0.021344	-0.129819	0.00283863	4.911e-05
69.9825	0.00473474	-0.0210692	-0.130496	0.00348292	-0.0001223
70.4824	0.00447936	-0.0208962	-0.131331	0.00451023	1.76e-06
70.9823	0.00448897	-0.0213628	-0.131961	0.00591646	0.00044118
71.4821	0.00415293	-0.0213553	-0.133014	0.00767863	0.00117409
71.982	0.00385638	-0.0217302	-0.133988	0.00876088	0.0011323
72.4819	0.0038811	-0.0221085	-0.134719	0.00914314	0.00224446
72.9818	0.00412269	-0.0223347	-0.135297	0.00988609	0.00145636
73.4816	0.0043238	-0.0220028	-0.135704	0.0110968	0.00069275
73.9815	0.00433659	-0.0226119	-0.136181	0.0138514	4.49e-06
74.4814	0.00426904	-0.0222959	-0.136229	0.0161439	0.00045368
74.9813	0.00411713	-0.022159	-0.136605	0.0188644	7.488e-05
75.4811	0.00426118	-0.0224871	-0.13683	0.0198923	-0.00014601
75.981	0.00420374	-0.0222928	-0.13703	0.0210969	-0.0001726
76.4809	0.00431092	-0.0227017	-0.13758	0.0224269	2.048e-05
76.9808	0.00420627	-0.0227278	-0.137719	0.0237985	-0.00056498
77.4806	0.00413391	-0.0227305	-0.137791	0.0240972	7.357e-05
77.9805	0.00397357	-0.0233451	-0.137665	0.0232084	-5.653e-05
78.4804	0.00410549	-0.0228097	-0.137844	0.023103	0.00098568
78.9803	0.00403053	-0.0237373	-0.137584	0.022805	0.00014376
79.4801	0.00411241	-0.0233946	-0.137382	0.0202818	0.00033274
79.98	0.00397302	-0.0236218	-0.137381	0.0195665	-0.00043477
80.4799	0.00360462	-0.0235721	-0.137462	0.0177822	-0.00016538
80.9798	0.00364606	-0.0234949	-0.137099	0.017971	-0.00182087
81.4796	0.00374062	-0.0240332	-0.137145	0.0151785	-0.0033811
81.9795	0.00350257	-0.0244387	-0.136962	0.0143952	-0.00271142
82.4794	0.00355093	-0.0242998	-0.136649	0.013747	-0.00175135
82.9793	0.00338996	-0.0244775	-0.135703	0.0132318	-0.00161086
83.4791	0.00351223	-0.0243567	-0.135039	0.0118306	-0.00141128
83.979	0.00316207	-0.0243088	-0.134491	0.0105344	-0.00323015
84.4789	0.00320488	-0.0248473	-0.13464	0.0103912	-0.00408488
84.9788	0.00289815	-0.0244583	-0.1348	0.00941174	-0.00486816
85.4786	0.00298838	-0.0249929	-0.135249	0.00855211	-0.00551452
85.9785	0.00260887	-0.0245807	-0.135755	0.00882585	-0.00595552
86.4784	0.00263713	-0.0244458	-0.136443	0.00721429	-0.00613435
86.9783	0.00234608	-0.0243648	-0.137302	0.00668541	-0.00601933
87.4781	0.00224436	-0.0240959	-0.13817	0.00530512	-0.0056117
87.978	0.00222877	-0.0242759	-0.138991	0.005103	-0.00494484
88.4779	0.0025558	-0.0240392	-0.139571	0.00514134	-0.0050827
88.9778	0.0025873	-0.0242562	-0.14021	0.00440647	-0.00609171
89.4776	0.00304735	-0.0239348	-0.140076	0.00490281	-0.00495371
89.9775	0.0024109	-0.0240736	-0.140214	0.00466837	-0.00564323
90.4774	0.00266006	-0.0239427	-0.139566	0.00368979	-0.00622196
90.9773	0.0023191	-0.0239164	-0.138942	0.00402151	-0.00664002
91.4771	0.00224902	-0.024006	-0.137687	0.00472436	-0.00484353
91.977	0.0024652	-0.0243368	-0.136157	0.00574718	-0.00584712
92.4769	0.00233313	-0.024645	-0.134236	0.00597662	-0.00674455
92.9768	0.00208563	-0.0243988	-0.132822	0.00728591	-0.00646163
93.4766	0.00198426	-0.0242067	-0.13092	0.00656937	-0.0059629
93.9765	0.00179828	-0.0245886	-0.129105	0.00471629	-0.00529542
94.4764	0.00129006	-0.0240409	-0.127058	0.00380452	-0.00552729
94.9763	0.00173972	-0.024426	-0.124415	0.00299918	-0.00772523
95.4761	0.00192008	-0.0242604	-0.121048	0.00243137	-0.00683936
95.976	0.00204952	-0.0246465	-0.117481	0.00222798	-0.00676139
96.4759	0.00185846	-0.0238255	-0.112895	0.00349023	-0.00755358
96.9758	0.00196205	-0.0237883	-0.107637	0.00424247	-0.00820589
97.4756	0.00198497	-0.0238284	-0.102021	0.00641755	-0.00764534
97.9755	0.00216113	-0.0233063	-0.096558	0.00693024	-0.00782903
98.4754	0.00184787	-0.0242211	-0.0916815	0.00663452	-0.00776371
98.9753	0.00178325	-0.0233086	-0.0873271	0.00750689	-0.00740711
99.4751	0.0016059	-0.0232683	-0.0831507	0.00753968	-0.00773967
99.975	0.00131872	-0.022764	-0.079781	0.00766014	-0.00674364
100.475	0.00118557	-0.0224233	-0.0766727	0.00883909	-0.00539472
100.975	0.00122388	-0.022276	-0.0741697	0.00800439	-0.00578018
101.475	0.00106006	-0.0220888	-0.0717242	0.00706383	-0.00397417
101.975	0.0010644	-0.0221207	-0.0694586	0.00707026	-0.00400756
102.474	0.0008629	-0.0220049	-0.0660108	0.00507331	-0.00501719
102.974	0.00095319	-0.021742	-0.0596385	0.00412866	-0.00399662
103.474	0.00083804	-0.0215985	-0.0500797	0.00440967	-0.00492508
103.974	0.00063277	-0.0222291	-0.0358012	0.00399882	-0.00484696
104.474	0.00046685	-0.0220096	-0.0173574	0.00391416	-0.0056956
104.974	0.00047377	-0.0220401	0.00671269	0.0052114	-0.00642961
105.474	0.00052934	-0.0224661	0.035673	0.00589663	-0.00694546
105.974	0.0006236	-0.023034	0.0683264	0.0059109	-0.00614819
106.473	0.0003684	-0.0229578	0.102424	0.00626577	-0.00599981
106.973	9.45e-06	-0.0229581	0.136296	0.00703146	-0.00453507
107.473	-5.486e-05	-0.0231675	0.168444	0.00827739	-0.00479097
107.973	-5.158e-05	-0.0235846	0.19759	0.0100712	-0.00383605
108.473	2.053e-05	-0.0233096	0.224567	0.0114716	-0.00364481
108.973	2.756e-05	-0.0230684	0.251743	0.0135476	-0.00423353
109.473	0.00020679	-0.0237571	0.278198	0.0153999	-0.00454198
109.973	4.408e-05	-0.0233662	0.304381	0.019111	-0.00245117
110.472	2.821e-05	-0.0228557	0.330313	0.0227333	-0.00090994
110.972	-0.00033129	-0.0228829	0.35501	0.0272007	-9.09495e-17
111.472	-0.00051996	-0.0229793	0.375151	0.0314259	0.00025326
111.972	-0.0003779	-0.022391	0.389815	0.0352733	0.00190698
112.472	-0.00013845	-0.0226352	0.398715	0.0376272	0.00305716
112.972	-6.111e-05	-0.0225013	0.402888	0.0414367	0.00476267
113.472	8.929e-05	-0.0223641	0.405398	0.0447039	0.00714277
113.972	0.00017707	-0.0227489	0.411339	0.0473322	0.00930292
114.471	0.00031153	-0.0229161	0.42197	0.0502444	0.0123423
114.971	0.00022692	-0.023099	0.436135	0.0543769	0.0163724
115.471	0.00028628	-0.0236717	0.454872	0.0555887	0.0214332
115.971	0.00011358	-0.0236232	0.475351	0.0567105	0.0254588
116.471	0.00021106	-0.0240661	0.496193	0.0567319	0.0303141
116.971	-3.32e-05	-0.0237617	0.516633	0.057651	0.0358776
117.471	-0.00023559	-0.0244641	0.534718	0.0584779	0.0399213
117.971	-0.00024242	-0.0246905	0.54903	0.0581213	0.0431781
118.47	-0.00016164	-0.0255314	0.55897	0.058487	0.0454787
118.97	0.00025504	-0.0253288	0.563413	0.0575105	0.0477366
119.47	0.00048645	-0.0259149	0.562591	0.0550989	0.0489622
119.97	0.00049362	-0.0254097	0.556125	0.0522737	0.0502638
120.47	0.00025638	-0.0256691	0.544623	0.0501625	0.0509142
120.97	-9.634e-05	-0.0253465	0.529775	0.047902	0.0533405
121.47	-0.00028835	-0.0256962	0.515073	0.0465868	0.0571371
121.97	-3.665e-05	-0.0248597	0.503015	0.0452925	0.0629344
122.469	0.00016973	-0.0254729	0.495039	0.0430218	0.0703877
122.969	0.00018674	-0.0253238	0.49089	0.0417897	0.0821188
123.469	-3.07e-06	-0.0255024	0.491464	0.0396268	0.0976261
123.969	0.00022267	-0.0256308	0.494969	0.0384997	0.116085
124.469	0.00010878	-0.0253067	0.501618	0.0373831	0.135358
124.969	0.00013271	-0.0253935	0.509189	0.0361679	0.156095
125.469	3.95e-05	-0.0251466	0.514917	0.033736	0.176875
125.969	-0.00017868	-0.024807	0.517163	0.0310129	0.195225
126.468	-0.00051729	-0.0247673	0.51687	0.028033	0.212801
126.968	-0.00083525	-0.0245446	0.513105	0.0248889	0.23052
127.468	-0.00098544	-0.02414	0.505418	0.0217248	0.248424
127.968	-0.00057447	-0.0244472	0.492565	0.0207364	0.267575
128.468	-0.00061019	-0.0243488	0.473787	0.019101	0.286967
128.968	-0.00099938	-0.0240661	0.44876	0.0189196	0.305395
129.468	-0.00136228	-0.0242259	0.41875	0.0183467	0.325498
129.968	-0.00142212	-0.0240799	0.386142	0.0185138	0.343744
130.467	-0.00128724	-0.0233564	0.355417	0.0196165	0.359349
130.967	-0.0010911	-0.023696	0.331215	0.0218309	0.371573
131.467	-0.00110707	-0.0237456	0.311738	0.0252801	0.378833
131.967	-0.00135629	-0.02334	0.293575	0.0300056	0.38184
132.467	-0.00183984	-0.0230887	0.274754	0.0349457	0.385716
132.967	-0.00178304	-0.0229968	0.25578	0.0399575	0.387817
133.467	-0.00178343	-0.0224236	0.236149	0.0448926	0.392462
133.967	-0.00159211	-0.0224808	0.217742	0.0496186	0.395959
134.466	-0.00183806	-0.0222941	0.199808	0.053026	0.398396
134.966	-0.00177336	-0.021332	0.182263	0.057061	0.40187
135.466	-0.00175539	-0.0204761	0.16349	0.062748	0.404431
135.966	-0.00165753	-0.0202849	0.143905	0.0670241	0.407014
136.466	-0.00147586	-0.0199191	0.122946	0.070736	0.408546
136.966	-0.00133722	-0.0197529	0.102081	0.0748103	0.408929
137.466	-0.00124678	-0.0194114	0.0818137	0.0781727	0.410128
137.966	-0.0012063	-0.0190078	0.0633454	0.0807057	0.410139
138.465	-0.00096329	-0.01879	0.0456281	0.0833141	0.408907
138.965	-0.00076897	-0.0186308	0.0285663	0.0859091	0.409471
139.465	-0.00038515	-0.018393	0.0128339	0.0873475	0.407879
139.965	-0.00045284	-0.0178161	-0.00088255	0.0874596	0.407097
140.465	-0.00048819	-0.017283	-0.0131953	0.0871272	0.40619
140.965	-0.00035503	-0.0169496	-0.0237896	0.0862781	0.405171
141.465	-0.00029982	-0.0169656	-0.0333999	0.0848402	0.404069
141.965	-7.836e-05	-0.0168313	-0.0419392	0.0827609	0.401948
142.464	-0.00032644	-0.0167771	-0.0492129	0.0800289	0.400943
142.964	-5.239e-05	-0.0166655	-0.0549339	0.0756828	0.39927
143.464	-1.81899e-16	-0.0163575	-0.0597493	0.0718407	0.400148
143.964	-0.00044164	-0.0158503	-0.06412	0.0687034	0.400822
144.464	-0.00049734	-0.0156631	-0.0686483	0.0653975	0.402428
144.964	-0.00051705	-0.0155719	-0.0726578	0.0639785	0.406148
145.464	-0.00050133	-0.0157071	-0.0763049	0.0614244	0.409102
145.964	-0.00070772	-0.0155607	-0.0794988	0.0575773	0.413342
146.463	-0.00076674	-0.0153655	-0.0822799	0.0543552	0.417979
146.963	-0.00079898	-0.0152459	-0.084831	0.0507339	0.425064
147.463	-0.00080741	-0.0153263	-0.0873485	0.0466675	0.430563
147.963	-0.00142419	-0.0150928	-0.0904048	0.0411573	0.438306
148.463	-0.00151534	-0.0150264	-0.093293	0.0372968	0.445123
148.963	-0.00142356	-0.0147461	-0.0962613	0.0332594	0.451668
149.463	-0.0014063	-0.0144912	-0.0989256	0.0291427	0.457597
149.963	-0.00173669	-0.0141384	-0.101391	0.0260775	0.461536
150.462	-0.00142319	-0.0139416	-0.103774	0.0231886	0.464151
150.962	-0.00209939	-0.0135303	-0.106444	0.0215453	0.465224
151.462	-0.00203189	-0.0131536	-0.108759	0.0191802	0.465627
151.962	-0.00257001	-0.0129486	-0.11118	0.017065	0.465322
152.462	-0.00258507	-0.0127979	-0.113178	0.0162133	0.463294
152.962	-0.00292207	-0.0124507	-0.114716	0.0145885	0.461577
153.462	-0.00294479	-0.012038	-0.11654	0.0140978	0.459251
153.962	-0.00287838	-0.011584	-0.118413	0.0116664	0.457337
154.461	-0.00309713	-0.0116233	-0.119822	0.0102068	0.454823
154.961	-0.00284947	-0.011554	-0.12126	0.00874708	0.450613
155.461	-0.00263104	-0.0117442	-0.12237	0.00627058	0.446629
155.961	-0.00234006	-0.0119336	-0.123925	0.00480594	0.441831
156.461	-0.00250062	-0.0119686	-0.125202	0.00344133	0.437133
156.961	-0.00262649	-0.0119507	-0.126828	0.00121022	0.430435
157.461	-0.00257515	-0.0116181	-0.128057	0.00118177	0.423619
157.961	-0.00258366	-0.0114733	-0.129375	0.000443	0.416629
158.46	-0.00239776	-0.0116601	-0.13091	-0.00102934	0.408349
158.96	-0.00226733	-0.0115481	-0.132028	-0.00118306	0.399609
159.46	-0.00220687	-0.0113607	-0.133339	-0.00094096	0.389216
159.96	-0.00185218	-0.0113314	-0.134341	-0.00132092	0.377908
160.46	-0.00234968	-0.0114359	-0.135402	-0.00035426	0.366396
160.96	-0.00196385	-0.0108752	-0.13677	-7.651e-05	0.35229
161.46	-0.00230797	-0.0102277	-0.1378	0.00040178	0.336119
161.96	-0.00227689	-0.00948623	-0.138699	9.09495e-17	0.316481
162.459	-0.00260559	-0.00877693	-0.139567	-0.00035386	0.295088
162.959	-0.00278992	-0.00785539	-0.140262	-0.00067165	0.271856
163.459	-0.00255301	-0.00672748	-0.140524	-0.00095721	0.246858
163.959	-0.00301568	-0.00578687	-0.140868	-0.00221008	0.221385
164.459	-0.00293158	-0.00505006	-0.14134	-0.00340229	0.194957
164.959	-0.00290511	-0.00412315	-0.141853	-0.00242857	0.169283
165.459	-0.00307926	-0.00320311	-0.142686	-0.00323504	0.146268
165.959	-0.0024629	-0.00183167	-0.143479	-0.00386027	0.127855
166.458	-0.00320573	3.63798e-16	-0.14422	-0.00424027	0.11184
166.958	-0.00296344	0.00184725	-0.144888	-0.00332785	0.0997783
167.458	-0.00345688	0.00486203	-0.145453	-0.00313085	0.0890589
167.958	-0.00394323	0.00882632	-0.146246	-0.00272785	0.0828752
168.458	-0.00388021	0.0146239	-0.1467	-0.00316666	0.0772969
168.958	-0.00399136	0.0223746	-0.146708	-0.00349103	0.073166
169.458	-0.00365571	0.0332583	-0.146538	-0.00369409	0.0703272
169.958	-0.0038868	0.0477086	-0.145835	-0.00276584	0.0685886
170.457	-0.00396656	0.065921	-0.144362	-0.00372662	0.0657274
170.957	-0.00389949	0.0877803	-0.142411	-0.00461808	0.0645618
171.457	-0.00420582	0.113068	-0.140189	-0.00536733	0.0630117
171.957	-0.00415058	0.140073	-0.137174	-0.00491102	0.0619638
172.457	-0.00485898	0.167758	-0.133984	-0.00422837	0.0613702
172.957	-0.00520151	0.195627	-0.130646	-0.00438223	0.0611866
173.457	-0.0052546	0.223542	-0.127167	-0.00441561	0.060365
173.957	-0.00574922	0.251608	-0.123524	-0.0052973	0.0598775
174.456	-0.00529305	0.279399	-0.119652	-0.00595213	0.0597578
174.956	-0.00587407	0.306823	-0.11518	-0.00623519	0.06105
175.456	-0.00513224	0.33251	-0.110194	-0.00501402	0.060774
175.956	-0.00568661	0.356246	-0.104373	-0.00322382	0.060938
176.456	-0.00545079	0.377839	-0.097247	-0.00092613	0.0616816
176.956	-0.00553072	0.397673	-0.0892409	-0.00026199	0.0641601
177.456	-0.00557048	0.416476	-0.0800932	0.00061141	0.0665057
177.956	-0.00556978	0.435666	-0.069866	0.00162312	0.0687967
178.455	-0.00578278	0.455112	-0.0586161	0.00168339	0.0721723
178.955	-0.00583645	0.476018	-0.047044	0.00172728	0.0767948
179.455	-0.00572457	0.498096	-0.0352329	0.00177396	0.082761
179.955	-0.00570623	0.521354	-0.0251123	0.00086982	0.0880576
180.455	-0.00592506	0.543708	-0.0170223	0.00010858	0.094586
180.955	-0.0062642	0.56531	-0.0101975	0.00066248	0.101224
181.455	-0.00633798	0.584693	-0.00438047	0.0016735	0.108738
181.955	-0.00651071	0.602832	0	0.00318772	0.113831
182.454	-0.00653458	0.619355	0.00344738	0.00419198	0.118197
182.954	-0.0069114	0.635625	0.00603184	0.00563079	0.122712
183.454	-0.00688977	0.652099	0.00785545	0.00744638	0.124308
183.954	-0.00708051	0.669495	0.00866715	0.00851817	0.12598
184.454	-0.00748812	0.685992	0.00924353	0.0096997	0.129912
184.954	-0.00759765	0.701372	0.00926158	0.00987175	0.133211
185.454	-0.00738714	0.716016	0.0086362	0.00891886	0.137858
185.954	-0.00748823	0.731533	0.00779375	0.00881617	0.139848
186.453	-0.00767086	0.748541	0.00691643	0.00859821	0.142189
186.953	-0.00743056	0.766891	0.00578397	0.00725848	0.144106
187.453	-0.00789509	0.785464	0.00477167	0.00583593	0.146861
187.953	-0.00782055	0.803438	0.00323305	0.00445149	0.151762
188.453	-0.0079332	0.819864	0.00138147	0.00424135	0.158011
188.953	-0.0077347	0.834381	-0.00103744	0.0043168	0.165619
189.453	-0.00797703	0.846797	-0.00361069	0.00471416	0.172423
189.953	-0.00779539	0.857392	-0.00636807	0.00444592	0.179141
190.452	-0.00793928	0.866699	-0.00842138	0.004525	0.184492
190.952	-0.00767665	0.873981	-0.0103637	0.00500024	0.189203
191.452	-0.00802175	0.880363	-0.0116869	0.0058857	0.194106
191.952	-0.00799709	0.88584	-0.0125173	0.00714945	0.197089
192.452	-0.00834866	0.89095	-0.0125253	0.00770284	0.19911
192.952	-0.00845656	0.896233	-0.0121853	0.00843045	0.201316
193.452	-0.00893378	0.902032	-0.0119167	0.00924597	0.203936
193.952	-0.00901939	0.907162	-0.0114212	0.009046	0.207172
194.451	-0.00931394	0.912284	-0.0109149	0.00774647	0.212147
194.951	-0.00930742	0.915318	-0.0107659	0.00736735	0.217837
195.451	-0.00935637	0.916856	-0.0110952	0.00598419	0.220988
195.951	-0.00945505	0.916563	-0.0114942	0.00565012	0.225281
196.451	-0.00971569	0.914447	-0.0125275	0.00546206	0.227452
196.951	-0.00936281	0.909675	-0.0136115	0.00545283	0.22818
197.451	-0.00925265	0.903868	-0.0151201	0.00463769	0.227293
197.951	-0.00889908	0.897737	-0.016656	0.00403322	0.225766
198.45	-0.00856194	0.893187	-0.018035	0.00469808	0.223719
198.95	-0.00839665	0.890439	-0.0194362	0.00463758	0.22136
199.45	-0.00818322	0.888746	-0.0207802	0.00579647	0.220993
199.95	-0.0080713	0.886757	-0.0218387	0.00513341	0.220968
200.45	-0.00783516	0.882973	-0.0226158	0.00458111	0.220596
200.95	-0.00849955	0.877768	-0.0223538	0.00419204	0.221326
201.45	-0.00818984	0.87226	-0.0223083	0.00401485	0.225824
201.95	-0.00887591	0.866537	-0.0216388	0.00509169	0.231878
202.449	-0.00880136	0.860246	-0.0201104	0.00542309	0.240316
202.949	-0.00891103	0.853616	-0.0175309	0.00494531	0.252119
203.449	-0.00892959	0.846871	-0.0149062	0.0046564	0.270293
203.949	-0.00880855	0.840852	-0.0119275	0.00560165	0.293621
204.449	-0.00861723	0.836225	-0.00942016	0.00577531	0.324394
204.949	-0.00791601	0.833407	-0.00633226	0.00609812	0.357315
205.449	-0.00739399	0.831979	-0.00358666	0.00551078	0.392438
205.949	-0.00612643	0.832908	-0.00099731	0.00594983	0.422478
206.448	-0.00443269	0.835025	0.00152532	0.00536677	0.449043
206.948	-0.00292519	0.837359	0.00407438	0.0046686	0.473125
207.448	-0.00046002	0.83999	0.00697687	0.00384068	0.49304
207.948	0.00112327	0.842623	0.00938784	0.00190044	0.509426
208.448	0.00375164	0.845113	0.0117875	-7.245e-05	0.526331
208.948	0.00593572	0.847518	0.0132665	-0.00089959	0.542022
209.448	0.00958781	0.849741	0.0138998	-0.00141455	0.559722
209.948	0.0136981	0.852172	0.013683	-0.00153676	0.577572
210.447	0.0195219	0.85556	0.0129113	-0.00023001	0.592417
210.947	0.0257533	0.861098	0.0114256	0.00045678	0.607985
211.447	0.0338966	0.867957	0.00985339	0.00037103	0.621993
211.947	0.0438388	0.875728	0.00785021	0.000398	0.632992
212.447	0.0562887	0.884209	0.00557014	0.00046357	0.641566
212.947	0.0715252	0.894543	0.00293143	-0.00051353	0.647449
213.447	0.090341	0.906415	0.00086816	-0.00158306	0.653537
213.947	0.113235	0.918823	-0.00156117	-0.00271409	0.655849
214.446	0.139817	0.931335	-0.00432474	-0.00385553	0.658467
214.946	0.17065	0.944269	-0.00722935	-0.00494435	0.6607
215.446	0.204113	0.955462	-0.00941652	-0.00490796	0.662851
215.946	0.239421	0.96458	-0.0112687	-0.00670977	0.66525
216.446	0.275368	0.970788	-0.0130773	-0.00633246	0.669228
216.946	0.313036	0.974819	-0.0145113	-0.00669205	0.673053
217.446	0.352198	0.978016	-0.0151034	-0.00681355	0.677875
217.946	0.393976	0.980988	-0.0156617	-0.00767855	0.683808
218.445	0.437531	0.984108	-0.0157772	-0.00725656	0.689848
218.945	0.481976	0.987428	-0.0156621	-0.00750468	0.695897
219.445	0.525916	0.990388	-0.0149181	-0.00644594	0.701852
219.945	0.569037	0.992194	-0.0136573	-0.00610142	0.707647
220.445	0.611319	0.992009	-0.0127792	-0.00555739	0.713299
220.945	0.652315	0.990543	-0.0118179	-0.00585587	0.718948
221.445	0.692789	0.988361	-0.0106535	-0.00601214	0.72285
221.945	0.732593	0.985455	-0.00879431	-0.00596202	0.731421
222.444	0.771338	0.982216	-0.00715126	-0.00561702	0.741173
222.944	0.809249	0.978292	-0.00528696	-0.00587581	0.753375
223.444	0.846751	0.973816	-0.00399036	-0.00460454	0.766225
223.944	0.884146	0.96942	-0.00302428	-0.00263525	0.781832
224.444	0.919527	0.965091	-0.0020818	-0.00088826	0.796285
224.944	0.951544	0.958994	-0.00031227	0.00270832	0.811626
225.444	0.98045	0.952151	0.00174329	0.00521795	0.829049
225.944	1.00574	0.945277	0.00447001	0.00863953	0.84774
226.443	1.02697	0.938346	0.00718066	0.0130433	0.868806
226.943	1.04399	0.930933	0.00972345	0.0174372	0.891309
227.443	1.05841	0.92276	0.0117757	0.0217742	0.913226
227.943	1.07368	0.91325	0.0129928	0.0270099	0.936597
228.443	1.09041	0.902571	0.0130471	0.032073	0.959628
228.943	1.10839	0.89343	0.0122962	0.0368228	0.985626
229.443	1.12854	0.887628	0.0108029	0.0411137	1.01099
229.943	1.1491	0.882588	0.00894431	0.0458116	1.04002
230.442	1.1687	0.877056	0.00690272	0.0487736	1.07298
230.942	1.18565	0.872052	0.00514576	0.0518471	1.10974
231.442	1.19885	0.868047	0.00290514	0.053955	1.14466
231.942	1.21025	0.865254	0.00067423	0.0560089	1.17477
232.442	1.22029	0.865709	-0.00137985	0.0579601	1.20415
232.942	1.22872	0.866434	-0.00244498	0.058747	1.2311
233.442	1.23464	0.866996	-0.00284546	0.0583257	1.256
233.942	1.23575	0.867454	-0.00258071	0.0587489	1.27545
234.441	1.23305	0.867884	-0.00180139	0.0581105	1.29344
234.941	1.22698	0.867758	-0.00080233	0.058461	1.31055
235.441	1.22074	0.867586	0.00049462	0.0588675	1.32768
235.941	1.21382	0.868097	0.00305905	0.0582958	1.35001
236.441	1.20691	0.868719	0.00608841	0.0586979	1.37681
236.941	1.20007	0.868583	0.00984046	0.0580284	1.40602
237.441	1.19323	0.867336	0.0139236	0.0571791	1.44034
237.941	1.18626	0.867815	0.0181727	0.0550865	1.47927
238.44	1.17847	0.872081	0.0224407	0.0537158	1.52094
238.94	1.17002	0.88	0.0266289	0.0520877	1.56424
239.44	1.16248	0.889438	0.03185	0.0491781	1.60598
239.94	1.15405	0.898425	0.0371682	0.0470145	1.64605
240.44	1.14588	0.906486	0.043443	0.0446931	1.69367
240.94	1.13819	0.912698	0.0506146	0.042271	1.74423
241.44	1.13051	0.916803	0.0601584	0.0398133	1.79582
241.94	1.12251	0.921196	0.0716713	0.03738	1.84562
242.439	1.11499	0.92577	0.0847891	0.0370302	1.89714
242.939	1.10755	0.931638	0.0989621	0.0357682	1.95439
243.439	1.09979	0.939836	0.114734	0.0334892	2.01758
243.939	1.09372	0.949685	0.13186	0.0301678	2.08479
244.439	1.08764	0.959822	0.150743	0.0288794	2.16007
244.939	1.0823	0.971379	0.171018	0.0277222	2.24032
245.439	1.07875	0.98415	0.191979	0.026664	2.32719
245.939	1.07487	0.996396	0.211959	0.0246516	2.41907
246.438	1.07119	1.0073	0.230772	0.0236468	2.51508
246.938	1.07035	1.01827	0.247065	0.0216401	2.613
247.438	1.07199	1.02862	0.260887	0.019577	2.71328
247.938	1.0752	1.03769	0.271041	0.0174611	2.81804
248.438	1.084	1.04761	0.278497	0.0173153	2.92393
248.938	1.09631	1.05954	0.284072	0.0151305	3.02195
249.438	1.10969	1.07353	0.288214	0.0118366	3.1139
249.938	1.12708	1.09041	0.291798	0.00953604	3.19595
250.437	1.1464	1.11241	0.294068	0.00839616	3.27371
250.937	1.16712	1.13863	0.295124	0.00750009	3.34348
251.437	1.19094	1.16737	0.294758	0.00684887	3.41009
251.937	1.2162	1.19759	0.29302	0.00641884	3.47315
252.437	1.2405	1.22782	0.290551	0.00516203	3.5328
252.937	1.26572	1.25432	0.289249	0.00403995	3.59262
253.437	1.29144	1.27556	0.289326	0.0030728	3.66239
253.937	1.31808	1.29166	0.292181	0.00329263	3.73734
254.436	1.34484	1.30459	0.299567	0.00171008	3.81735
254.936	1.37185	1.31475	0.312556	0.0013326	3.90214
255.436	1.40245	1.32554	0.327876	0.00128271	3.97821
255.936	1.43768	1.33636	0.344538	0.00062645	4.0394
256.436	1.4752	1.34661	0.361433	0.00145512	4.08711
256.936	1.51556	1.35762	0.379422	0.00289647	4.12099
257.436	1.55954	1.3714	0.398977	0.00400278	4.14904
257.936	1.60676	1.38814	0.420201	0.00583002	4.17762
258.435	1.65823	1.41046	0.441358	0.00847131	4.20976
258.935	1.71326	1.43718	0.461612	0.00996538	4.24766
259.435	1.76834	1.46695	0.479627	0.0143316	4.2883
259.935	1.82059	1.49843	0.494262	0.0185719	4.33628
260.435	1.87079	1.5283	0.505203	0.0214644	4.38671
260.935	1.91942	1.55544	0.513069	0.0257829	4.44699
261.435	1.9647	1.57999	0.518207	0.0283068	4.50878
261.935	2.00456	1.6014	0.520443	0.030745	4.56975
262.434	2.04058	1.62054	0.519209	0.0298966	4.62616
262.934	2.07339	1.64072	0.517978	0.029642	4.6773
263.434	2.10259	1.66027	0.517335	0.0290547	4.72185
263.934	2.13007	1.6819	0.51774	0.0281803	4.75917
264.434	2.16006	1.70813	0.518827	0.0280967	4.79244
264.934	2.19254	1.73814	0.521369	0.0268796	4.82977
265.434	2.22629	1.77246	0.525775	0.0245724	4.8697
265.934	2.25766	1.81004	0.530661	0.0243121	4.9157
266.433	2.28703	1.84676	0.534992	0.0242453	4.96718
266.933	2.31573	1.88134	0.539592	0.0233621	5.02321
267.433	2.34481	1.91424	0.54483	0.0236388	5.08161
267.933	2.37525	1.94534	0.549556	0.0230537	5.14403
268.433	2.40589	1.97353	0.555223	0.0225228	5.20902
268.933	2.43404	2.00193	0.561022	0.0220152	5.28085
269.433	2.46006	2.03381	0.566401	0.0205031	5.35949
269.933	2.48509	2.06912	0.571979	0.0189922	5.44028
270.432	2.50921	2.10431	0.577061	0.0185681	5.51403
270.932	2.5347	2.13967	0.57975	0.0172959	5.58864
271.432	2.56207	2.17554	0.581841	0.017199	5.65956
271.932	2.59228	2.2098	0.581441	0.0173266	5.72531
272.432	2.62659	2.23841	0.578709	0.0156363	5.79185
272.932	2.6675	2.26313	0.576264	0.0161119	5.86331
273.432	2.71299	2.28543	0.575992	0.0157916	5.93756
273.932	2.7579	2.30529	0.577575	0.0155931	6.0109
274.431	2.79965	2.32538	0.581983	0.0144727	6.07537
274.931	2.83968	2.3462	0.588316	0.0144068	6.13229
275.431	2.87774	2.36949	0.597263	0.0134072	6.1878
275.931	2.91223	2.39571	0.607388	0.0124477	6.24469
276.431	2.94578	2.4233	0.618133	0.0115652	6.30587
276.931	2.97854	2.45612	0.630045	0.0108003	6.37002
277.431	3.00907	2.49327	0.643416	0.0112064	6.43627
277.931	3.04033	2.53347	0.658085	0.00982261	6.5012
278.43	3.07175	2.58015	0.67414	0.00970775	6.56595
278.93	3.10382	2.63141	0.689877	0.00908391	6.62948
279.43	3.13563	2.68999	0.704933	0.0112599	6.6836
279.93	3.17051	2.75467	0.718996	0.0127299	6.72929
280.43	3.20974	2.82324	0.731585	0.0161485	6.77329
280.93	3.25155	2.89403	0.741184	0.0225802	6.81792
281.43	3.29504	2.9663	0.747294	0.0343859	6.86356
281.93	3.34046	3.03674	0.751136	0.0500976	6.90848
282.429	3.38967	3.09777	0.753375	0.0742551	6.9498
282.929	3.44116	3.15212	0.753491	0.106267	6.99367
283.429	3.49164	3.20367	0.750233	0.148014	7.0343
283.929	3.54212	3.25695	0.742049	0.19774	7.07571
284.429	3.5928	3.30787	0.728586	0.254981	7.11593
284.929	3.64347	3.35461	0.712846	0.304679	7.15882
285.429	3.69289	3.40205	0.694436	0.35166	7.20015
285.929	3.74218	3.4493	0.673093	0.400542	7.23743
286.428	3.79033	3.49739	0.648659	0.450359	7.27232
286.928	3.83425	3.54227	0.622289	0.504279	7.30476
287.428	3.87185	3.58412	0.595077	0.561555	7.33591
287.928	3.90173	3.62823	0.572723	0.618304	7.3721
288.428	3.9208	3.67425	0.554412	0.677648	7.40767
288.928	3.9315	3.72057	0.538949	0.737892	7.4406
289.428	3.93827	3.76646	0.524806	0.798348	7.47198
289.928	3.94323	3.81132	0.511723	0.861424	7.50706
290.427	3.95025	3.85607	0.499563	0.930561	7.54312
290.927	3.96049	3.89978	0.488846	1.00193	7.57913
291.427	3.97238	3.94241	0.479004	1.07424	7.61298
291.927	3.98548	3.98158	0.468758	1.14805	7.6486
292.427	4.00283	4.01761	0.457328	1.21988	7.68401
292.927	4.02512	4.05517	0.446062	1.28932	7.71812
293.427	4.05318	4.09866	0.434227	1.35739	7.75286
293.927	4.0864	4.14413	0.4231	1.42658	7.78725
294.426	4.12532	4.19272	0.413506	1.49874	7.82227
294.926	4.16967	4.24492	0.404488	1.57583	7.85695
295.426	4.21805	4.29803	0.396409	1.65771	7.89235
295.926	4.26858	4.35191	0.391651	1.74298	7.9257
296.426	4.32001	4.40534	0.390792	1.83189	7.96039
296.926	4.36767	4.45398	0.392587	1.92354	7.99713
297.426	4.41121	4.49809	0.397358	2.0158	8.03671
297.926	4.45192	4.53877	0.404953	2.10852	8.07887
298.425	4.48996	4.57787	0.416499	2.20169	8.12817
298.925	4.52457	4.62041	0.432366	2.29848	8.17983
299.425	4.55581	4.6689	0.452422	2.39516	8.22938
299.925	4.58477	4.72398	0.476062	2.49497	8.281
300.425	4.61177	4.7789	0.503638	2.59824	8.33372
300.925	4.63711	4.83625	0.53362	2.7032	8.3832
301.425	4.6623	4.89858	0.563626	2.81204	8.42502
301.925	4.68849	4.96591	0.59235	2.92103	8.45925
302.424	4.71595	5.03161	0.618182	3.0285	8.48785
302.924	4.74383	5.10251	0.638155	3.14021	8.51677
303.424	4.77222	5.17502	0.650485	3.25932	8.55269
303.924	4.80009	5.24565	0.654317	3.38189	8.59244
304.424	4.82761	5.31742	0.651679	3.51171	8.6385
304.924	4.8547	5.38682	0.642572	3.64735	8.69003
305.424	4.88154	5.45363	0.626343	3.78788	8.74752
305.924	4.90719	5.51704	0.604188	3.92888	8.80668
306.423	4.93244	5.57966	0.578758	4.07158	8.87136
306.923	4.96001	5.63652	0.552914	4.21302	8.92766
307.423	4.98767	5.69021	0.531973	4.35411	8.97793
307.923	5.01317	5.73623	0.518191	4.49274	9.02265
308.423	5.03415	5.77914	0.509279	4.62586	9.05641
308.923	5.05652	5.82109	0.503748	4.75571	9.07713
309.423	5.08	5.86689	0.499316	4.88398	9.08662
309.923	5.10639	5.9133	0.494197	5.00866	9.0888
310.422	5.13721	5.95946	0.487969	5.13091	9.08763
310.922	5.17098	6.00416	0.481514	5.25816	9.08878
311.422	5.20698	6.04675	0.474714	5.38581	9.0943
311.922	5.24634	6.09249	0.465681	5.51387	9.10021
312.422	5.28926	6.13992	0.455584	5.63511	9.11245
312.922	5.33405	6.18588	0.445977	5.75626	9.13299
313.422	5.37991	6.22949	0.438422	5.88024	9.15838
313.922	5.42489	6.27009	0.432815	6.00563	9.18957
314.421	5.46727	6.30901	0.427267	6.12551	9.22802
314.921	5.50686	6.34966	0.421011	6.23978	9.27246
315.421	5.54243	6.38893	0.415305	6.34861	9.31778
315.921	5.57379	6.4265	0.411363	6.45254	9.36125
316.421	5.60059	6.46605	0.406905	6.55346	9.40099
316.921	5.62581	6.51109	0.401928	6.65348	9.43037
317.421	5.65107	6.56135	0.397372	6.75473	9.4514
317.921	5.6785	6.6186	0.395598	6.85515	9.47119
318.42	5.70673	6.67612	0.395989	6.95039	9.49572
318.92	5.73523	6.73365	0.399392	7.04415	9.52422
319.42	5.76543	6.78945	0.405065	7.13453	9.55262
319.92	5.79655	6.84462	0.412088	7.22198	9.5847
320.42	5.82935	6.8971	0.419005	7.30952	9.62115
320.92	5.86339	6.94776	0.42388	7.39869	9.66136
321.42	5.89908	6.99813	0.427311	7.49726	9.70141
321.92	5.93371	7.04901	0.429306	7.60178	9.74128
322.419	5.96994	7.10634	0.428418	7.71396	9.78112
322.919	6.00752	7.16716	0.42372	7.82963	9.82332
323.419	6.04963	7.22661	0.414962	7.94764	9.87038
323.919	6.09405	7.28572	0.404796	8.06413	9.91959
324.419	6.1412	7.34178	0.394447	8.17076	9.97081
324.919	6.19209	7.39139	0.386099	8.26626	10.0255
325.419	6.24318	7.43344	0.380704	8.35316	10.0798
325.919	6.29409	7.47039	0.377052	8.43586	10.1293
326.418	6.34739	7.50477	0.371759	8.51538	10.1725
326.918	6.39686	7.53744	0.363995	8.59706	10.2095
327.418	6.44275	7.56862	0.354307	8.67629	10.2436
327.918	6.48843	7.5987	0.344367	8.75225	10.2749
328.418	6.52779	7.6285	0.337702	8.82414	10.3026
328.918	6.55649	7.65965	0.33528	8.9002	10.3353
329.418	6.58221	7.69275	0.336633	8.9725	10.3685
329.918	6.61034	7.72869	0.341553	9.04547	10.3995
330.417	6.64163	7.76813	0.34935	9.11528	10.4302
330.917	6.67512	7.81164	0.360474	9.18263	10.4608
331.417	6.71004	7.86177	0.376375	9.24104	10.4915
331.917	6.7512	7.91075	0.397	9.28797	10.5221
332.417	6.80352	7.95821	0.420132	9.32949	10.5514
332.917	6.86614	8.00769	0.443013	9.36628	10.5814
333.417	6.93851	8.05961	0.465652	9.39842	10.6106
333.917	7.01661	8.10309	0.487394	9.42929	10.638
334.416	7.10192	8.13816	0.50648	9.45657	10.6604
334.916	7.19311	8.16472	0.52182	9.48514	10.682
335.416	7.2811	8.18475	0.533924	9.51418	10.7083
335.916	7.36039	8.20165	0.543467	9.54485	10.7388
336.416	7.43182	8.22182	0.555607	9.57943	10.7676
336.916	7.49453	8.24607	0.570124	9.61605	10.7934
337.416	7.54556	8.2704	0.586176	9.65963	10.8201
337.916	7.58858	8.29715	0.601903	9.70768	10.8491
338.415	7.61736	8.32526	0.616251	9.75798	10.8762
338.915	7.63835	8.35259	0.630262	9.80865	10.9026
339.415	7.65703	8.38101	0.643757	9.85934	10.9316
339.915	7.68118	8.41006	0.655564	9.9043	10.9627
340.415	7.70182	8.44038	0.666587	9.94274	10.9943
340.915	7.71706	8.47375	0.678148	9.97322	11.0268
341.415	7.72798	8.50548	0.688794	9.99699	11.0619
341.915	7.73693	8.5361	0.69966	10.015	11.1021
342.414	7.74573	8.56486	0.711676	10.033	11.1439
342.914	7.75971	8.59095	0.725505	10.0571	11.1894
343.414	7.77394	8.61632	0.741363	10.0817	11.2364
343.914	7.78515	8.64186	0.759226	10.1075	11.2823
344.414	7.79291	8.66572	0.779677	10.1337	11.3302
344.914	7.80074	8.68847	0.802853	10.1671	11.3759
345.414	7.81173	8.71455	0.829839	10.2028	11.4179
345.914	7.82235	8.7472	0.860052	10.2422	11.4511
346.413	7.83537	8.78612	0.890717	10.2844	11.4767
346.913	7.85349	8.82826	0.922181	10.3312	11.4989
347.413	7.87841	8.87305	0.95142	10.3772	11.5225
347.913	7.90698	8.91617	0.976747	10.42	11.5507
348.413	7.93701	8.95799	0.997853	10.4625	11.586
348.913	7.96519	8.99745	1.01525	10.5024	11.6198
349.413	7.98871	9.03112	1.02744	10.5355	11.6484
349.913	8.00779	9.05825	1.03748	10.5627	11.6772
350.412	8.02403	9.081	1.04807	10.5818	11.7047
350.912	8.03894	9.09778	1.06134	10.6032	11.7284
351.412	8.05206	9.11493	1.07553	10.6249	11.7497
351.912	8.06627	9.13245	1.08889	10.6479	11.7654
352.412	8.08391	9.1462	1.10154	10.6753	11.7826
352.912	8.10036	9.16104	1.11403	10.7029	11.8019
353.412	8.11607	9.17493	1.12829	10.7372	11.8165
353.912	8.12796	9.19399	1.1435	10.7732	11.8339
354.411	8.1345	9.2161	1.15636	10.8085	11.8527
354.911	8.13516	9.23996	1.16495	10.8402	11.8731
355.411	8.13294	9.26201	1.16945	10.8696	11.8971
355.911	8.13262	9.28291	1.17007	10.8972	11.9181
356.411	8.13626	9.30296	1.16796	10.9235	11.9384
356.911	8.14753	9.32116	1.1636	10.9463	11.954
357.411	8.17301	9.33721	1.1573	10.9724	11.965
357.911	8.20624	9.34975	1.14955	10.9948	11.9718
358.41	8.24386	9.35835	1.14134	11.0135	11.9781
358.91	8.2896	9.36695	1.13396	11.0316	11.98
359.41	8.34022	9.37977	1.12868	11.0528	11.9825
359.91	8.39346	9.39371	1.1225	11.0753	11.9831
360.41	8.44912	9.40947	1.12185	11.0981	11.9834
360.91	8.5049	9.42946	1.12647	11.1195	11.986
361.41	8.55618	9.45179	1.13807	11.1428	11.9897
361.91	8.5998	9.47772	1.15365	11.1589	11.997
362.409	8.64102	9.50278	1.17453	11.1694	12.0054
362.909	8.67816	9.52803	1.20157	11.1736	12.0152
363.409	8.70945	9.55421	1.23257	11.1721	12.0256
363.909	8.73343	9.5808	1.26795	11.1692	12.0388
364.409	8.75389	9.60588	1.30968	11.1669	12.0541
364.909	8.7733	9.63072	1.35718	11.1663	12.0707
365.409	8.78883	9.65497	1.40942	11.1695	12.086
365.909	8.79776	9.67894	1.46604	11.1748	12.1054
366.408	8.7999	9.70327	1.52628	11.1851	12.1297
366.908	8.79507	9.72821	1.58875	11.1984	12.1576
367.408	8.78699	9.75253	1.65341	11.2139	12.1884
367.908	8.77476	9.77544	1.71978	11.235	12.2215
368.408	8.7585	9.79262	1.78601	11.2563	12.2579
368.908	8.74251	9.80536	1.8495	11.28	12.2983
369.408	8.72951	9.81525	1.90687	11.3041	12.3389
369.908	8.71719	9.81989	1.95638	11.3199	12.3775
370.407	8.70689	9.82217	1.99813	11.3331	12.4115
370.907	8.6961	9.82199	2.03439	11.3379	12.4404
371.407	8.6859	9.82098	2.06992	11.3386	12.4656
371.907	8.67602	9.82069	2.10449	11.3386	12.482
372.407	8.6625	9.82269	2.13816	11.3416	12.4917
372.907	8.64974	9.82646	2.17252	11.3442	12.4976
373.407	8.63611	9.83123	2.20771	11.3461	12.501
373.907	8.61958	9.83678	2.24258	11.3493	12.5009
374.406	8.6027	9.84065	2.27935	11.3565	12.5052
374.906	8.5847	9.84166	2.321	11.3676	12.5142
375.406	8.5627	9.84544	2.36724	11.383	12.5248
375.906	8.53941	9.85077	2.41886	11.3975	12.5345
376.406	8.51595	9.85734	2.47481	11.4147	12.546
376.906	8.49344	9.86617	2.53989	11.4302	12.5588
377.406	8.46847	9.87758	2.6104	11.4449	12.5767
377.906	8.44433	9.89301	2.68695	11.4552	12.601
378.405	8.42092	9.91294	2.77245	11.4633	12.6256
378.905	8.40176	9.93586	2.86512	11.4698	12.649
379.405	8.38661	9.96062	2.95889	11.4746	12.6737
379.905	8.37662	9.98648	3.05089	11.4757	12.6953
380.405	8.37418	10.01	3.13737	11.4772	12.7164
380.905	8.37745	10.0298	3.2216	11.4814	12.738
381.405	8.38318	10.0494	3.30256	11.4836	12.7595
381.905	8.38965	10.0658	3.38079	11.4888	12.7809
382.404	8.39897	10.0799	3.45353	11.4898	12.8055
382.904	8.41265	10.095	3.52285	11.4905	12.8323
383.404	8.42706	10.1136	3.58856	11.4897	12.8597
383.904	8.44135	10.132	3.64842	11.4907	12.8846
384.404	8.45398	10.1485	3.70281	11.4895	12.9044
384.904	8.46245	10.1631	3.75258	11.4884	12.9186
385.404	8.46999	10.1762	3.79876	11.4877	12.9237
385.904	8.47352	10.185	3.84214	11.489	12.9227
386.403	8.47569	10.1904	3.88407	11.4939	12.915
386.903	8.48066	10.1928	3.92967	11.4999	12.9057
387.403	8.48695	10.1941	3.97902	11.5064	12.8953
387.903	8.49364	10.1963	4.03044	11.5166	12.8787
388.403	8.50281	10.2031	4.08346	11.5299	12.865
388.903	8.51419	10.2116	4.13727	11.544	12.855
389.403	8.52974	10.2214	4.1907	11.5586	12.8511
389.903	8.54631	10.2325	4.24383	11.573	12.8515
390.402	8.56163	10.2418	4.29428	11.5855	12.8562
390.902	8.57873	10.2502	4.34073	11.5962	12.8654
391.402	8.59651	10.2613	4.39113	11.6025	12.8753
391.902	8.61395	10.2716	4.44	11.6048	12.8867
392.402	8.63346	10.2838	4.48874	11.6073	12.8993
392.902	8.65904	10.2949	4.53952	11.6082	12.9135
393.402	8.69028	10.3056	4.59265	11.6099	12.9277
393.902	8.72769	10.3118	4.64491	11.6141	12.9402
394.401	8.7692	10.3146	4.69711	11.6172	12.9491
394.901	8.80917	10.3165	4.74976	11.6226	12.9547
395.401	8.843	10.3164	4.80517	11.6304	12.9598
395.901	8.87129	10.3168	4.86248	11.6413	12.9634
396.401	8.89197	10.3177	4.91824	11.6487	12.9664
396.901	8.9077	10.323	4.97432	11.6518	12.9672
397.401	8.91651	10.331	5.03227	11.6522	12.9691
397.901	8.91733	10.342	5.0913	11.6508	12.9727
398.4	8.91176	10.3536	5.15252	11.6489	12.9783
398.9	8.90178	10.3657	5.21828	11.6464	12.987
399.4	8.88914	10.377	5.28987	11.6479	12.9936
399.9	8.87657	10.3862	5.36253	11.6553	12.9977
400.4	8.86698	10.3946	5.43554	11.6661	13.0011
400.9	8.85932	10.4027	5.50665	11.6771	13.0045
401.4	8.84489	10.4096	5.57225	11.686	13.006
401.9	8.82933	10.4156	5.6318	11.6941	13.0085
402.399	8.81723	10.4249	5.68888	11.7023	13.011
402.899	8.81534	10.4316	5.74369	11.7092	13.0135
403.399	8.81913	10.436	5.79682	11.7146	13.0138
403.899	8.82941	10.4399	5.85225	11.7204	13.0148
404.399	8.84283	10.445	5.9083	11.7268	13.0134
404.899	8.85936	10.4498	5.96321	11.7328	13.0126
405.399	8.8777	10.4544	6.01514	11.7365	13.0123
405.899	8.89384	10.4573	6.06218	11.742	13.0104
406.398	8.90767	10.4599	6.10471	11.7504	13.008
406.898	8.91981	10.4622	6.14767	11.7597	13.0031
407.398	8.92592	10.466	6.19194	11.7654	13
407.898	8.92565	10.4726	6.23871	11.7691	12.9972
408.398	8.92051	10.4799	6.2839	11.7699	12.9962
408.898	8.91276	10.4857	6.32607	11.7738	12.999
409.398	8.90582	10.4921	6.36968	11.7772	13.0029
409.898	8.89521	10.4962	6.41405	11.7811	13.0032
410.397	8.88703	10.4984	6.46029	11.7869	13.0056
410.897	8.87998	10.5017	6.50995	11.7915	13.0057
411.397	8.88264	10.5068	6.5638	11.795	13.003
411.897	8.90926	10.5125	6.62384	11.8015	12.9976
412.397	8.95279	10.5189	6.68976	11.8099	12.9926
412.897	9.0028	10.5253	6.76012	11.8149	12.9907
413.397	9.06001	10.5301	6.83531	11.8164	12.9895
413.897	9.12032	10.5355	6.91313	11.8221	12.9898
414.396	9.18374	10.5407	6.9913	11.8262	12.9932
414.896	9.25002	10.5453	7.0718	11.8296	13.0013
415.396	9.32234	10.5475	7.15363	11.8322	13.0114
415.896	9.39382	10.5495	7.23312	11.8372	13.0246
416.396	9.45961	10.5518	7.31119	11.8377	13.0364
416.896	9.51537	10.5546	7.38723	11.8411	13.0494
417.396	9.56213	10.5554	7.46076	11.8461	13.0629
417.896	9.59933	10.5552	7.53316	11.8563	13.0711
418.395	9.63	10.5546	7.60412	11.864	13.0782
418.895	9.65826	10.5526	7.67593	11.8746	13.0825
419.395	9.68209	10.5494	7.74766	11.8902	13.0862
419.895	9.70107	10.5446	7.81776	11.9077	13.0856
420.395	9.71547	10.5414	7.88664	11.9256	13.0818
420.895	9.72486	10.5383	7.95602	11.941	13.0714
421.395	9.734	10.5328	8.02548	11.9503	13.0573
421.895	9.74134	10.5246	8.09228	11.957	13.0402
422.394	9.74441	10.5148	8.15729	11.9631	13.0253
422.894	9.7416	10.5054	8.2227	11.9758	13.0132
423.394	9.73474	10.4977	8.29018	11.9872	13.0087
423.894	9.72671	10.4921	8.35723	11.9956	13.0093
424.394	9.72094	10.4881	8.41975	12.0016	13.0171
424.894	9.71585	10.4858	8.48384	12.0038	13.0305
425.394	9.71241	10.4858	8.55247	12.0052	13.0445
425.894	9.71117	10.4869	8.62	12.0037	13.0606
426.393	9.7104	10.4888	8.68795	12.0057	13.0773
426.893	9.70838	10.4926	8.75592	12.0072	13.0929
427.393	9.70607	10.4976	8.82589	12.0071	13.1067
427.893	9.70424	10.5009	8.89129	12.0064	13.1208
428.393	9.69938	10.5053	8.95087	12.0036	13.1333
428.893	9.6901	10.5125	9.00188	12.0005	13.1427
429.393	9.67507	10.5202	9.04585	11.9957	13.1473
429.893	9.65621	10.5292	9.08648	11.9869	13.1451
430.392	9.63384	10.5392	9.12422	11.9778	13.1354
430.892	9.60588	10.551	9.1605	11.9673	13.115
431.392	9.57528	10.5616	9.19448	11.9523	13.081
431.892	9.54429	10.5711	9.22673	11.938	13.0421
432.392	9.51694	10.5783	9.255	11.9237	13.0049
432.892	9.49339	10.5848	9.28155	11.9107	12.9881
433.392	9.47666	10.5902	9.30436	11.8985	12.9941
433.892	9.46405	10.5932	9.32492	11.8862	13.0146
434.391	9.44946	10.5945	9.3449	11.8712	13.0427
434.891	9.43351	10.5956	9.36561	11.86	13.0804
435.391	9.41531	10.5978	9.38553	11.8503	13.1192
435.891	9.39719	10.6035	9.40296	11.8465	13.148
436.391	9.38274	10.6086	9.41775	11.8428	13.171
436.891	9.37411	10.6123	9.43263	11.8398	13.1898
437.391	9.3662	10.6171	9.45105	11.8374	13.2002
437.891	9.36043	10.6198	9.4708	11.8341	13.2026
438.39	9.35885	10.6202	9.4911	11.8276	13.1984
438.89	9.36132	10.62	9.51037	11.8218	13.1897
439.39	9.36674	10.6225	9.53292	11.8178	13.1763
439.89	9.37214	10.6291	9.55868	11.8127	13.1639
440.39	9.37628	10.6371	9.58396	11.8096	13.1584
440.89	9.37795	10.6485	9.61119	11.8063	13.1628
441.39	9.37908	10.6621	9.63725	11.8009	13.1724
441.89	9.3784	10.6735	9.66149	11.7983	13.1825
442.389	9.3799	10.6828	9.68325	11.7955	13.1934
442.889	9.38244	10.6899	9.70158	11.7912	13.205
443.389	9.3816	10.6986	9.71836	11.7853	13.2212
443.889	9.37713	10.7095	9.73548	11.778	13.2395
444.389	9.37013	10.7199	9.75081	11.7745	13.2589
444.889	9.36145	10.7317	9.76286	11.7711	13.2734
445.389	9.35369	10.7458	9.77471	11.7669	13.2825
445.889	9.34883	10.7615	9.78909	11.765	13.2835
446.388	9.34798	10.7756	9.80617	11.7626	13.2839
446.888	9.3536	10.7875	9.82518	11.7627	13.287
447.388	9.36507	10.7961	9.85068	11.7624	13.2888
447.888	9.38221	10.8027	9.87914	11.7615	13.2882
448.388	9.40048	10.8077	9.9078	11.7592	13.2848
448.888	9.41542	10.8143	9.93628	11.7606	13.2808
449.388	9.42652	10.8215	9.96698	11.7601	13.2762
449.888	9.43069	10.8256	9.99729	11.7639	13.2675
450.387	9.42731	10.8216	10.0283	11.7693	13.2611
450.887	9.42005	10.8172	10.0577	11.7744	13.2559
451.387	9.40969	10.8125	10.0847	11.7823	13.2547
451.887	9.40179	10.8092	10.1087	11.788	13.2559
452.387	9.39526	10.8076	10.1307	11.7945	13.2599
452.887	9.39177	10.8083	10.1515	11.8049	13.2651
453.387	9.39236	10.8096	10.1701	11.8164	13.2702
453.887	9.40172	10.8121	10.185	11.8265	13.2731
454.386	9.42003	10.8167	10.1965	11.838	13.2701
454.886	9.44086	10.8218	10.2054	11.8454	13.2645
455.386	9.46744	10.8262	10.2118	11.8544	13.2571
455.886	9.49724	10.8296	10.2159	11.8595	13.2502
456.386	9.53124	10.8322	10.2189	11.8676	13.2409
456.886	9.56847	10.8367	10.2202	11.87	13.2358
457.386	9.60386	10.8418	10.2222	11.8735	13.2321
457.886	9.63728	10.8484	10.2235	11.8736	13.2241
458.385	9.66711	10.8577	10.2251	11.8711	13.2158
458.885	9.69693	10.8681	10.2264	11.864	13.2145
459.385	9.72473	10.8773	10.228	11.8595	13.212
459.885	9.74865	10.8833	10.2284	11.855	13.2068
460.385	9.77187	10.8872	10.2273	11.851	13.2014
460.885	9.79236	10.8904	10.2238	11.8487	13.1925
461.385	9.81218	10.8934	10.2187	11.8436	13.1799
461.885	9.83477	10.895	10.2107	11.8419	13.1668
462.384	9.85749	10.8951	10.201	11.8423	13.1568
462.884	9.88168	10.8961	10.1938	11.8432	13.1485
463.384	9.90235	10.8944	10.1902	11.8458	13.1441
463.884	9.92156	10.8922	10.19	11.8506	13.1388
464.384	9.94142	10.8933	10.1925	11.8597	13.1322
464.884	9.95929	10.8946	10.1982	11.8671	13.1263
465.384	9.98197	10.8972	10.2034	11.8771	13.1197
465.884	10.0089	10.8987	10.2092	11.8861	13.1105
466.383	10.0396	10.8989	10.2145	11.8951	13.1024
466.883	10.0751	10.8974	10.2176	11.897	13.0948
467.383	10.1129	10.8941	10.2186	11.8938	13.0876
467.883	10.1511	10.8879	10.22	11.887	13.082
468.383	10.1881	10.8818	10.2211	11.8788	13.075
468.883	10.2196	10.8753	10.2236	11.8688	13.0669
469.383	10.2427	10.869	10.2281	11.861	13.06
469.883	10.2555	10.8595	10.2325	11.8564	13.057
470.382	10.2623	10.848	10.2358	11.8541	13.0555
470.882	10.2675	10.8351	10.241	11.8577	13.0568
471.382	10.2705	10.8213	10.2465	11.8643	13.0602
471.882	10.2701	10.8089	10.2503	11.8705	13.0668
472.382	10.2671	10.7979	10.2538	11.8764	13.0735
472.882	10.2612	10.7928	10.2578	11.8791	13.0808
473.382	10.2546	10.7914	10.2624	11.8757	13.0875
473.882	10.2435	10.7893	10.2695	11.869	13.0923
474.381	10.2317	10.7873	10.2799	11.8623	13.0961
474.881	10.2175	10.7868	10.2924	11.8575	13.1019
475.381	10.2044	10.7838	10.3078	11.8555	13.11
475.881	10.188	10.7796	10.3224	11.8593	13.1171
476.381	10.171	10.7756	10.3355	11.8654	13.1251
476.881	10.1535	10.7723	10.347	11.8739	13.1328
477.381	10.134	10.7701	10.359	11.8845	13.1381
477.881	10.1167	10.7686	10.3709	11.8925	13.1409
478.38	10.1012	10.7647	10.3795	11.8992	13.1443
478.88	10.09	10.7619	10.3892	11.9028	13.1508
479.38	10.0848	10.7586	10.4001	11.9025	13.1596
479.88	10.0797	10.7558	10.4133	11.9029	13.1696
480.38	10.0728	10.7535	10.4271	11.9011	13.1776
480.88	10.0663	10.7519	10.4395	11.8969	13.1833
481.38	10.0564	10.7499	10.4511	11.8927	13.1887
481.88	10.0408	10.7461	10.4638	11.8864	13.1939
482.379	10.0213	10.7392	10.4778	11.8841	13.1993
482.879	9.99185	10.7313	10.4902	11.886	13.2074
483.379	9.95785	10.7214	10.5039	11.8942	13.2185
483.879	9.92377	10.7122	10.5201	11.9084	13.2319
484.379	9.89633	10.7026	10.5384	11.9266	13.2445
484.879	9.88058	10.6934	10.5611	11.943	13.2561
485.379	9.86498	10.6853	10.5872	11.9569	13.2676
485.879	9.8579	10.6815	10.6161	11.97	13.2799
486.378	9.85622	10.6782	10.648	11.9786	13.2956
486.878	9.85795	10.6776	10.6812	11.9876	13.3084
487.378	9.86173	10.6782	10.7115	11.9932	13.3185
487.878	9.85882	10.679	10.7379	11.9919	13.3254
488.378	9.85042	10.6812	10.7577	11.989	13.3278
488.878	9.84087	10.685	10.7734	11.983	13.3316
489.378	9.82539	10.687	10.7869	11.9751	13.3371
489.878	9.80945	10.6854	10.8039	11.9702	13.342
490.377	9.79086	10.6816	10.8254	11.9651	13.3442
490.877	9.77429	10.6767	10.8495	11.9657	13.3436
491.377	9.75439	10.6694	10.8742	11.9665	13.3401
491.877	9.73374	10.6622	10.9028	11.9707	13.3383
492.377	9.71246	10.6563	10.9302	11.9736	13.3385
492.877	9.69663	10.6515	10.9537	11.9789	13.34
493.377	9.67972	10.6479	10.9779	11.9837	13.343
493.877	9.66199	10.6473	11.0056	11.9877	13.3441
494.376	9.6389	10.6503	11.0344	11.9918	13.3462
494.876	9.61047	10.6556	11.0589	11.9987	13.3448
495.376	9.58569	10.6625	11.0761	12.0049	13.3397
495.876	9.56977	10.6686	11.0831	12.0076	13.3359
496.376	9.55903	10.6748	11.0804	12.0091	13.3357
496.876	9.55529	10.6818	11.0705	12.0039	13.3329
497.376	9.55875	10.6908	11.0533	11.9975	13.3285
497.876	9.57006	10.6992	11.0349	11.9891	13.3245
498.375	9.58849	10.7078	11.0157	11.981	13.3192
498.875	9.6116	10.7179	10.9971	11.9727	13.3157
499.375	9.64047	10.7297	10.9784	11.9668	13.3124
499.875	9.67379	10.7433	10.9618	11.9607	13.3114
500.375	9.71018	10.7569	10.9453	11.9567	13.3097
500.875	9.75106	10.7693	10.9318	11.9528	13.3102
501.375	9.79795	10.783	10.9217	11.9519	13.3079
501.875	9.84347	10.7981	10.9129	11.9477	13.3056
502.374	9.88303	10.8145	10.9017	11.9415	13.3014
502.874	9.91397	10.8344	10.893	11.9352	13.3002
503.374	9.93903	10.8575	10.8878	11.9265	13.3013
503.874	9.95753	10.8836	10.8838	11.9168	13.3013
504.374	9.96952	10.9101	10.8825	11.9064	13.297
504.874	9.97737	10.9321	10.8843	11.8982	13.294
505.374	9.9813	10.9486	10.8865	11.8941	13.2904
505.874	9.98134	10.9619	10.8853	11.8958	13.2861
506.373	9.97864	10.9771	10.8787	11.8997	13.2809
506.873	9.97057	10.9913	10.8682	11.9067	13.2759
507.373	9.95535	11.0058	10.8564	11.9095	13.2692
507.873	9.93565	11.0177	10.8441	11.9136	13.2643
508.373	9.92254	11.0275	10.8301	11.917	13.2586
508.873	9.9099	11.0386	10.8154	11.9236	13.2558
509.373	9.90097	11.0438	10.8001	11.9275	13.2556
509.873	9.89273	11.0493	10.7814	11.9327	13.2575
510.372	9.88385	11.0519	10.7619	11.9396	13.2648
510.872	9.87354	11.0501	10.7412	11.9475	13.2734
511.372	9.86263	11.043	10.7218	11.9577	13.2838
511.872	9.85119	11.0312	10.7031	11.9693	13.2914
512.372	9.84188	11.0191	10.6861	11.9829	13.2944
512.872	9.83603	11.0092	10.6705	11.9972	13.2947
513.372	9.833	11.002	10.6542	12.0091	13.2975
513.872	9.82671	10.9984	10.6391	12.0156	13.3013
514.371	9.81793	10.9988	10.628	12.0188	13.3078
514.871	9.80577	11.0018	10.6173	12.018	13.3186
515.371	9.79145	11.0069	10.6085	12.0148	13.3289
515.871	9.77345	11.0121	10.5997	12.01	13.3408
516.371	9.75276	11.018	10.5898	12.0007	13.3555
516.871	9.73131	11.0233	10.5772	11.9902	13.3706
517.371	9.70887	11.0252	10.5623	11.9839	13.3856
517.871	9.683	11.0216	10.5459	11.9753	13.3976
518.37	9.6548	11.013	10.5324	11.9678	13.4088
518.87	9.62828	11.0038	10.5194	11.9586	13.4185
519.37	9.60376	10.9963	10.5082	11.9521	13.4209
519.87	9.58116	10.9908	10.4985	11.9466	13.4194
520.37	9.56504	10.985	10.4888	11.9411	13.416
520.87	9.55362	10.9781	10.4758	11.9365	13.4141
521.37	9.54424	10.9717	10.4612	11.9344	13.4131
521.87	9.53859	10.9671	10.4476	11.9275	13.4101
522.369	9.53318	10.964	10.4327	11.9171	13.4065
522.869	9.52871	10.9649	10.4176	11.9069	13.4038
523.369	9.52156	10.9693	10.4035	11.8969	13.4025
523.869	9.51711	10.9762	10.3896	11.885	13.4019
524.369	9.51474	10.9875	10.3766	11.8713	13.4025
524.869	9.51375	11.0003	10.3651	11.8571	13.4074
525.369	9.50946	11.0134	10.3555	11.8437	13.4124
525.869	9.50475	11.0252	10.3504	11.8337	13.4172
526.368	9.4965	11.0357	10.3509	11.8254	13.419
526.868	9.48285	11.0462	10.3572	11.8167	13.4193
527.368	9.46776	11.0563	10.3653	11.8076	13.4166
527.868	9.45772	11.0631	10.3743	11.799	13.4114
528.368	9.44895	11.068	10.3852	11.7887	13.4068
528.868	9.44536	11.0729	10.4005	11.7798	13.4005
529.368	9.44722	11.075	10.4157	11.7722	13.3943
529.868	9.45167	11.076	10.4282	11.7613	13.3851
530.367	9.45908	11.074	10.4422	11.752	13.3736
530.867	9.47092	11.0681	10.4577	11.7448	13.3619
531.367	9.47737	11.0605	10.4745	11.7412	13.347
531.867	9.47851	11.0522	10.4928	11.7376	13.3343
532.367	9.47984	11.0442	10.5137	11.7352	13.3212
532.867	9.48059	11.0364	10.5435	11.7325	13.3094
533.367	9.48552	11.0271	10.5738	11.7361	13.2953
533.867	9.48892	11.0179	10.6031	11.7417	13.2864
534.366	9.49185	11.0073	10.6308	11.7517	13.2833
534.866	9.49864	10.9962	10.6532	11.7623	13.2819
535.366	9.50595	10.9826	10.6733	11.7758	13.2785
535.866	9.51427	10.9677	10.6939	11.7932	13.2717
536.366	9.52496	10.9537	10.7129	11.8121	13.2609
536.866	9.53344	10.9434	10.7311	11.8312	13.2494
537.366	9.542	10.94	10.7466	11.8506	13.2417
537.866	9.55247	10.9431	10.7591	11.8646	13.2386
538.365	9.56504	10.949	10.7656	11.8786	13.2354
538.865	9.57982	10.9553	10.7722	11.8893	13.2345
539.365	9.59576	10.9623	10.7768	11.9003	13.235
539.865	9.60776	10.9642	10.7789	11.9114	13.2359
540.365	9.61305	10.9659	10.7778	11.9201	13.2399
540.865	9.61357	10.9677	10.7781	11.927	13.2426
541.365	9.60944	10.9712	10.7739	11.9314	13.2454
541.865	9.60382	10.9719	10.7693	11.9311	13.2428
542.364	9.59904	10.9705	10.7643	11.9267	13.2384
542.864	9.59397	10.9668	10.7588	11.9213	13.2341
543.364	9.59127	10.9595	10.7597	11.9173	13.2301
543.864	9.5924	10.9529	10.7662	11.9129	13.2265
544.364	9.60087	10.9475	10.7743	11.9074	13.2245
544.864	9.61396	10.944	10.7809	11.9008	13.221
545.364	9.62703	10.9417	10.7856	11.8961	13.218
545.864	9.63999	10.9433	10.7855	11.8902	13.2116
546.363	9.65388	10.9472	10.7893	11.883	13.205
546.863	9.66523	10.9516	10.7991	11.8743	13.2017
547.363	9.67494	10.9548	10.808	11.8632	13.2012
547.863	9.68318	10.9569	10.8138	11.849	13.2036
548.363	9.69653	10.9598	10.8188	11.8402	13.2047
548.863	9.71704	10.9593	10.8229	11.8354	13.2041
549.363	9.73896	10.9565	10.8235	11.8317	13.2035
549.863	9.76216	10.9512	10.8222	11.8268	13.2008
550.362	9.78647	10.943	10.82	11.8204	13.1985
550.862	9.80925	10.9354	10.8239	11.8114	13.1965
551.362	9.82877	10.9284	10.8251	11.8018	13.1925
551.862	9.85113	10.9226	10.8254	11.7957	13.1862
552.362	9.87152	10.9175	10.826	11.7905	13.1805
552.862	9.88983	10.9134	10.8274	11.7832	13.1725
553.362	9.90339	10.9111	10.8282	11.7788	13.1622
553.862	9.91634	10.9102	10.8277	11.7744	13.1523
554.361	9.9243	10.9076	10.8313	11.7699	13.1454
554.861	9.93755	10.9067	10.8338	11.7661	13.145
555.361	9.95208	10.909	10.8383	11.7589	13.1437
555.861	9.96483	10.9126	10.848	11.7533	13.1413
556.361	9.97092	10.9156	10.8626	11.7486	13.1423
556.861	9.9717	10.9176	10.8848	11.7431	13.1398
557.361	9.96849	10.9182	10.9104	11.7402	13.1431
557.861	9.96715	10.9178	10.9405	11.7375	13.1517
558.36	9.96885	10.915	10.9736	11.7386	13.1594
558.86	9.97309	10.9112	11.002	11.7431	13.1661
559.36	9.97719	10.9071	11.0257	11.7512	13.1755
559.86	9.98487	10.905	11.0412	11.761	13.1825
560.36	9.99356	10.9059	11.0485	11.7692	13.1879
560.86	10.0004	10.9067	11.0496	11.7805	13.197
561.36	10.0047	10.9089	11.0467	11.7885	13.2067
561.86	10.0039	10.9081	11.0455	11.7991	13.2189
562.359	9.99492	10.9049	11.0489	11.8092	13.2293
562.859	9.98778	10.8999	11.0487	11.8177	13.2383
563.359	9.97853	10.8931	11.0443	11.8249	13.2435
563.859	9.96081	10.886	11.0345	11.8373	13.2474
564.359	9.94437	10.8779	11.0319	11.8495	13.2521
564.859	9.92947	10.8674	11.0374	11.8659	13.2563
565.359	9.91445	10.8554	11.0446	11.8844	13.2578
565.859	9.91267	10.845	11.0535	11.9066	13.2574
566.358	9.92014	10.8366	11.065	11.9243	13.2561
566.858	9.93484	10.8294	11.0787	11.939	13.2559
567.358	9.95211	10.8241	11.0897	11.949	13.2528
567.858	9.97866	10.8207	11.0997	11.9486	13.2488
568.358	10.0126	10.8191	11.1112	11.9408	13.246
568.858	10.0645	10.8189	11.1181	11.9288	13.2427
569.358	10.1293	10.8173	11.1264	11.9138	13.2381
569.858	10.2006	10.8168	11.1304	11.896	13.2344
570.357	10.273	10.8214	11.1361	11.8771	13.2318
570.857	10.3438	10.8297	11.139	11.8579	13.2314
571.357	10.4117	10.8411	11.1411	11.8386	13.231
571.857	10.4751	10.8557	11.1447	11.8226	13.2302
572.357	10.5344	10.8726	11.1466	11.8104	13.2257
572.857	10.596	10.8891	11.15	11.8056	13.2192
573.357	10.6638	10.9036	11.1553	11.8054	13.212
573.857	10.7281	10.9175	11.1575	11.8099	13.2044
574.356	10.7866	10.9281	11.1623	11.8208	13.2019
574.856	10.8341	10.9432	11.1686	11.8385	13.2
575.356	10.8714	10.9561	11.1726	11.8587	13.201
575.856	10.8978	10.9651	11.1767	11.8806	13.1998
576.356	10.9208	10.9726	11.1809	11.9031	13.2003
576.856	10.942	10.9837	11.186	11.9208	13.2023
577.356	10.9609	10.9965	11.1947	11.9354	13.2018
577.856	10.9784	11.0103	11.2006	11.9479	13.2003
578.355	10.9878	11.0219	11.2029	11.9551	13.1998
578.855	10.9916	11.0312	11.2038	11.9579	13.1993
579.355	10.9896	11.0392	11.2021	11.9634	13.1975
579.855	10.9821	11.0458	11.199	11.9743	13.1955
580.355	10.97	11.0483	11.1922	11.9891	13.1942
580.855	10.9577	11.0483	11.184	12.0129	13.1917
581.355	10.9451	11.0482	11.176	12.0415	13.1889
581.855	10.9301	11.0474	11.171	12.0789	13.186
582.354	10.9154	11.0482	11.1697	12.1254	13.1842
582.854	10.9028	11.0521	11.1689	12.1842	13.1825
583.354	10.8923	11.0564	11.1729	12.2529	13.1821
583.854	10.8818	11.0594	11.1779	12.3369	13.182
584.354	10.8688	11.0608	11.1844	12.4367	13.1799
584.854	10.8507	11.0617	11.1939	12.5533	13.1778
585.354	10.8318	11.0638	11.201	12.6832	13.1787
585.854	10.8132	11.065	11.209	12.825	13.1764
586.353	10.7843	11.0667	11.2151	12.9789	13.1738
586.853	10.7515	11.0702	11.2269	13.1423	13.1709
587.353	10.7117	11.0753	11.2377	13.3089	13.1668
587.853	10.6739	11.0824	11.2527	13.4791	13.164
588.353	10.6365	11.0918	11.2702	13.6472	13.1636
588.853	10.6029	11.1023	11.2859	13.8136	13.1638
589.353	10.5741	11.1172	11.3	13.9769	13.1668
589.853	10.5479	11.133	11.3115	14.1392	13.1672
590.352	10.5211	11.146	11.3153	14.3038	13.166
590.852	10.4942	11.1549	11.3138	14.466	13.1659
591.352	10.4731	11.1587	11.3104	14.625	13.1671
591.852	10.4514	11.1551	11.3038	14.7801	13.1685
592.352	10.4305	11.1471	11.2914	14.9324	13.1662
592.852	10.4121	11.1394	11.2745	15.0822	13.1655
593.352	10.3994	11.1374	11.2518	15.2308	13.1667
593.852	10.3897	11.1401	11.2251	15.385	13.1705
594.351	10.3832	11.1445	11.1965	15.548	13.1779
594.851	10.3755	11.1491	11.1722	15.7177	13.1849
595.351	10.3665	11.1527	11.1495	15.8975	13.19
595.851	10.3579	11.1526	11.1314	16.0859	13.1968
596.351	10.3497	11.1482	11.1154	16.2762	13.2026
596.851	10.3413	11.1391	11.1024	16.4697	13.2047
597.351	10.3337	11.1276	11.0976	16.6559	13.2014
597.851	10.326	11.1145	11.092	16.8349	13.1966
598.35	10.3146	11.1017	11.0911	17.0032	13.1914
598.85	10.3054	11.0924	11.0856	17.1567	13.1881
599.35	10.2977	11.0878	11.0814	17.3067	13.1844
599.85	10.2871	11.087	11.0743	17.4535	13.1788
600.35	10.2751	11.0914	11.064	17.5981	13.1771
600.85	10.2602	11.0996	11.0533	17.7392	13.1802
601.35	10.2407	11.1109	11.0435	17.8851	13.1848
601.85	10.2154	11.1249	11.0364	18.0437	13.1923
602.349	10.182	11.1363	11.0314	18.2096	13.2038
602.849	10.1491	11.1461	11.0324	18.3858	13.217
603.349	10.1242	11.1516	11.0317	18.5698	13.2303
603.849	10.1066	11.1576	11.0316	18.7627	13.2406
604.349	10.0974	11.1594	11.0275	18.96	13.2472
604.849	10.0896	11.162	11.0248	19.1611	13.2503
605.349	10.0818	11.1665	11.0204	19.3687	13.2505
605.849	10.0707	11.172	11.0172	19.5856	13.2515
606.348	10.0621	11.1777	11.0139	19.804	13.2532
606.848	10.0557	11.1858	11.0096	20.0222	13.2533
607.348	10.0549	11.1942	11.0116	20.2328	13.2482
607.848	10.0632	11.2007	11.0122	20.438	13.2398
608.348	10.0719	11.2052	11.0106	20.6455	13.2276
608.848	10.0861	11.2099	11.0075	20.8521	13.2174
609.348	10.1071	11.2167	11.0027	21.0624	13.2124
609.848	10.1355	11.221	10.9928	21.277	13.2108
610.347	10.1667	11.2258	10.9805	21.4981	13.2134
610.847	10.1969	11.2287	10.9623	21.7198	13.2205
611.347	10.2172	11.2299	10.9386	21.9362	13.2284
611.847	10.2313	11.2307	10.9091	22.1456	13.236
612.347	10.2408	11.2299	10.8824	22.3427	13.2442
612.847	10.2504	11.2274	10.8554	22.5296	13.2545
613.347	10.2583	11.2257	10.8283	22.7044	13.2682
613.847	10.2643	11.2227	10.7999	22.861	13.283
614.346	10.2754	11.2231	10.7758	23.003	13.302
614.846	10.2937	11.2241	10.7533	23.1307	13.3251
615.346	10.3176	11.2279	10.7341	23.2564	13.3578
615.846	10.3466	11.2323	10.7185	23.393	13.3978
616.346	10.3833	11.2358	10.7069	23.5263	13.4425
616.846	10.4249	11.2355	10.7006	23.6628	13.4939
617.346	10.4661	11.2336	10.6962	23.7978	13.5574
617.846	10.5041	11.232	10.6897	23.924	13.636
618.345	10.5362	11.2286	10.6804	24.0486	13.73
618.845	10.5631	11.2247	10.6701	24.1713	13.8388
619.345	10.5838	11.2209	10.6573	24.2973	13.9637
619.845	10.6022	11.2171	10.6438	24.4251	14.1035
620.345	10.6201	11.2156	10.6264	24.5592	14.2523
620.845	10.6338	11.2163	10.616	24.7041	14.4054
621.345	10.6449	11.2188	10.6056	24.8508	14.5574
621.845	10.6501	11.2214	10.6029	25.0038	14.7214
622.344	10.6507	11.2236	10.5985	25.1602	14.8909
622.844	10.6536	11.2242	10.5979	25.3175	15.0684
623.344	10.6562	11.2239	10.6013	25.4774	15.2573
623.844	10.6527	11.223	10.6051	25.6361	15.4468
624.344	10.6423	11.2206	10.6068	25.7946	15.6448
624.844	10.6311	11.2171	10.6065	25.9509	15.845
625.344	10.6253	11.2122	10.6027	26.1059	16.052
625.844	10.6203	11.206	10.6002	26.2551	16.2582
626.343	10.6158	11.1958	10.6026	26.4011	16.464
626.843	10.6108	11.1857	10.6054	26.5403	16.6711
627.343	10.6051	11.1757	10.6064	26.6721	16.8774
627.843	10.5999	11.1659	10.6024	26.7951	17.0885
628.343	10.5961	11.1555	10.5947	26.9091	17.3029
628.843	10.5953	11.1439	10.588	27.0165	17.5185
629.343	10.5971	11.1319	10.5836	27.1178	17.7427
629.843	10.6007	11.1223	10.5813	27.2151	17.9668
630.342	10.6102	11.1127	10.5821	27.3073	18.1963
630.842	10.6226	11.1047	10.5866	27.3983	18.428
631.342	10.6351	11.1015	10.5927	27.484	18.6567
631.842	10.647	11.097	10.6068	27.5641	18.8754
632.342	10.6568	11.0915	10.623	27.6402	19.0848
632.842	10.6641	11.0804	10.6403	27.7141	19.2801
633.342	10.6699	11.07	10.654	27.7823	19.4571
633.842	10.6694	11.06	10.6676	27.8451	19.6201
634.341	10.6616	11.0497	10.6756	27.907	19.7867
634.841	10.6532	11.0395	10.6777	27.9614	19.9469
635.341	10.6476	11.0296	10.6744	28.0087	20.1096
635.841	10.6357	11.0223	10.6676	28.0524	20.2782
636.341	10.6286	11.0153	10.663	28.0909	20.4548
636.841	10.6271	11.0107	10.6653	28.1274	20.6349
637.341	10.6335	11.0086	10.6681	28.1648	20.8197
637.841	10.6404	11.0095	10.6724	28.2045	21.0086
638.34	10.6416	11.0116	10.6774	28.2418	21.1992
638.84	10.6404	11.0145	10.6851	28.2807	21.3882
639.34	10.6406	11.0227	10.6966	28.3317	21.5835
639.84	10.6412	11.0368	10.7077	28.3912	21.7867
640.34	10.6344	11.0536	10.721	28.4635	21.9846
640.84	10.625	11.0761	10.7343	28.5459	22.1791
641.34	10.6151	11.1005	10.7458	28.6373	22.3647
641.84	10.6013	11.1297	10.7518	28.7328	22.5428
642.339	10.5809	11.1668	10.7572	28.8331	22.7184
642.839	10.5599	11.2163	10.7597	28.936	22.887
643.339	10.5367	11.2755	10.7607	29.0419	23.0536
643.839	10.5161	11.3461	10.7634	29.1497	23.2186
644.339	10.502	11.426	10.7651	29.2617	23.3778
644.839	10.4935	11.5227	10.7703	29.3755	23.5267
645.339	10.4837	11.6372	10.7787	29.49	23.6658
645.839	10.4792	11.7673	10.7921	29.6021	23.7962
646.338	10.4717	11.9058	10.8059	29.7106	23.9162
646.838	10.4651	12.056	10.8274	29.8144	24.0367
647.338	10.4567	12.2198	10.8495	29.9145	24.1511
647.838	10.4486	12.3965	10.8761	30.0125	24.2625
648.338	10.4419	12.5851	10.8985	30.1059	24.3686
648.838	10.4355	12.7819	10.9147	30.1987	24.4747
649.338	10.4305	12.9804	10.932	30.2876	24.5786
649.838	10.4286	13.1784	10.9417	30.3756	24.6884
650.337	10.4298	13.3738	10.9494	30.4624	24.8096
650.837	10.4358	13.568	10.9502	30.5485	24.9395
651.337	10.4473	13.7609	10.9518	30.6302	25.0774
651.837	10.4621	13.9488	10.9562	30.7053	25.2223
652.337	10.4793	14.1248	10.9584	30.7751	25.3693
652.837	10.4939	14.2889	10.9655	30.8379	25.5218
653.337	10.5046	14.4471	10.9712	30.8977	25.6782
653.837	10.5108	14.6084	10.9813	30.9555	25.8347
654.336	10.5099	14.7622	10.9984	31.0118	25.9864
654.836	10.4984	14.9121	11.0236	31.0679	26.1289
655.336	10.4736	15.0556	11.0552	31.1213	26.2643
655.836	10.4444	15.1955	11.0868	31.1762	26.395
656.336	10.4202	15.3352	11.1211	31.23	26.5202
656.836	10.3934	15.4715	11.1539	31.2857	26.6363
657.336	10.3718	15.602	11.1838	31.3383	26.7502
657.836	10.3644	15.7322	11.2129	31.3896	26.861
658.335	10.3645	15.8616	11.2407	31.4413	26.9732
658.835	10.3686	15.9886	11.2743	31.4921	27.084
659.335	10.3771	16.1083	11.3165	31.54	27.2073
659.835	10.3847	16.2255	11.3674	31.5835	27.3423
660.335	10.3945	16.3369	11.4273	31.6267	27.4851
660.835	10.4007	16.4411	11.4957	31.6728	27.6374
661.335	10.4019	16.5342	11.5836	31.7201	27.8099
661.835	10.3996	16.6199	11.6854	31.7633	27.9976
662.334	10.3949	16.7009	11.7951	31.8036	28.1962
662.834	10.3908	16.7856	11.9177	31.8483	28.4065
663.334	10.38	16.8776	12.0572	31.8909	28.6173
663.834	10.366	16.9732	12.2084	31.9348	28.8269
664.334	10.349	17.0744	12.3817	31.9827	29.0396
664.834	10.3318	17.1759	12.5759	32.0329	29.2521
665.334	10.3125	17.2758	12.7864	32.0859	29.4627
665.834	10.2882	17.3813	13.0206	32.1391	29.6662
666.333	10.2632	17.4894	13.2736	32.193	29.8694
666.833	10.237	17.6043	13.5394	32.2487	30.0716
667.333	10.2092	17.7234	13.815	32.3088	30.268
667.833	10.1765	17.8453	14.0941	32.3797	30.4601
668.333	10.1359	17.9709	14.3754	32.46	30.6515
668.833	10.0984	18.1025	14.6608	32.5502	30.839
669.333	10.0553	18.2392	14.9527	32.643	31.013
669.833	10.013	18.3798	15.2437	32.7366	31.1688
670.332	9.96614	18.5283	15.5306	32.8285	31.3052
670.832	9.91893	18.6774	15.8148	32.9152	31.4323
671.332	9.87127	18.8318	16.0898	33.0042	31.5564
671.832	9.83016	18.9896	16.3614	33.089	31.6787
672.332	9.79643	19.1499	16.6306	33.1661	31.7964
672.832	9.76718	19.312	16.8921	33.2373	31.9054
673.332	9.73717	19.4809	17.137	33.301	32.0036
673.832	9.70606	19.6544	17.3668	33.3624	32.1001
674.331	9.66969	19.8359	17.5829	33.4245	32.1966
674.831	9.63268	20.0318	17.7891	33.4845	32.2954
675.331	9.59104	20.2422	17.9857	33.5506	32.3846
675.831	9.54759	20.4644	18.1615	33.6223	32.4715
676.331	9.50522	20.697	18.3119	33.6979	32.5547
676.831	9.46676	20.9346	18.439	33.7765	32.6405
677.331	9.44094	21.1755	18.5452	33.8523	32.7292
677.831	9.43067	21.4152	18.6426	33.9241	32.8248
678.33	9.43127	21.6554	18.7422	33.9915	32.9269
678.83	9.43386	21.8885	18.8527	34.0575	33.0293
679.33	9.43704	22.114	18.9751	34.1178	33.1262
679.83	9.43432	22.3325	19.1072	34.1722	33.2207
680.33	9.42831	22.544	19.2461	34.2201	33.3133
680.83	9.41607	22.7464	19.3889	34.2648	33.4026
681.33	9.39998	22.941	19.531	34.3035	33.4953
681.83	9.38185	23.1251	19.67	34.3406	33.586
682.329	9.36195	23.3037	19.8028	34.3782	33.6728
682.829	9.34098	23.4758	19.9313	34.4173	33.7577
683.329	9.32052	23.6455	20.0536	34.4587	33.8367
683.829	9.29933	23.8177	20.1681	34.5048	33.9125
684.329	9.27738	23.992	20.2749	34.5564	33.9753
684.829	9.25079	24.1644	20.3762	34.6163	34.032
685.329	9.22254	24.3342	20.476	34.6801	34.0902
685.829	9.19268	24.4986	20.5767	34.7529	34.1466
686.328	9.16398	24.662	20.6814	34.836	34.1972
686.828	9.13584	24.8248	20.796	34.9236	34.235
687.328	9.10888	24.9852	20.9191	35.0216	34.2644
687.828	9.08202	25.1456	21.0514	35.1204	34.2912
688.328	9.05901	25.3068	21.1959	35.214	34.3151
688.828	9.04175	25.4643	21.3451	35.3048	34.3415
689.328	9.0342	25.6154	21.4976	35.401	34.3668
689.828	9.02676	25.7576	21.6563	35.5029	34.3862
690.327	9.01819	25.8885	21.8224	35.6107	34.4041
690.827	9.01123	26.0082	21.9963	35.7132	34.4225
691.327	9.00425	26.1273	22.177	35.8194	34.4395
691.827	9.00033	26.2376	22.3595	35.9255	34.4657
692.327	8.9979	26.3463	22.5487	36.0306	34.4956
692.827	9.00126	26.4589	22.7421	36.1293	34.5303
693.327	9.01657	26.5667	22.9437	36.2176	34.5716
693.827	9.04131	26.6685	23.1552	36.2916	34.6166
694.326	9.0753	26.7669	23.378	36.3475	34.6649
694.826	9.11578	26.8603	23.6094	36.3938	34.7137
695.326	9.15617	26.9449	23.8483	36.4358	34.7587
695.826	9.19518	27.024	24.0908	36.4654	34.8005
696.326	9.234	27.0984	24.3394	36.4861	34.8403
696.826	9.27144	27.1719	24.5903	36.505	34.8732
697.326	9.31145	27.2507	24.8448	36.5263	34.9049
697.826	9.35157	27.3194	25.0973	36.5487	34.9325
698.325	9.38824	27.3846	25.3503	36.5781	34.9642
698.825	9.42109	27.4499	25.6058	36.6097	34.999
699.325	9.44769	27.5049	25.8607	36.6461	35.0304
699.825	9.47031	27.5464	26.1135	36.6797	35.0556
700.325	9.49086	27.5748	26.3547	36.7173	35.0764
700.825	9.51825	27.5947	26.5772	36.7548	35.0943
701.325	9.55024	27.608	26.7806	36.7906	35.1087
701.825	9.58746	27.6214	26.9641	36.8261	35.1162
702.324	9.62827	27.639	27.1343	36.8618	35.1197
702.824	9.67066	27.6577	27.2844	36.8969	35.1257
703.324	9.70923	27.6792	27.417	36.9251	35.1308
703.824	9.74408	27.6996	27.54	36.9492	35.1333
704.324	9.77452	27.7217	27.6572	36.976	35.1368
704.824	9.8048	27.7419	27.7676	37.0061	35.1428
705.324	9.83839	27.7609	27.8694	37.0393	35.1496
705.824	9.87021	27.7788	27.9676	37.0786	35.1572
706.323	9.90184	27.8021	28.0612	37.1282	35.1635
706.823	9.92826	27.8256	28.1498	37.1876	35.1693
707.323	9.95055	27.8438	28.2284	37.2604	35.1713
707.823	9.97125	27.8619	28.3042	37.337	35.1736
708.323	9.988	27.8783	28.3833	37.4112	35.1801
708.823	9.99837	27.8924	28.4744	37.4803	35.1848
709.323	10.0017	27.9028	28.5745	37.5403	35.1886
709.823	10.0011	27.9079	28.6857	37.5884	35.1884
710.322	9.99654	27.9122	28.8042	37.6272	35.1863
710.822	9.99178	27.9152	28.9287	37.6587	35.1899
711.322	9.98726	27.9151	29.0596	37.6803	35.1966
711.822	9.98468	27.9123	29.1938	37.6925	35.2038
712.322	9.97922	27.9099	29.3251	37.6948	35.2093
712.822	9.97978	27.905	29.4517	37.6878	35.2141
713.322	9.98565	27.8956	29.5746	37.6702	35.2205
713.822	9.99522	27.8787	29.6968	37.6413	35.2296
714.321	10.0107	27.8554	29.8197	37.6001	35.2405
714.821	10.0359	27.8328	29.9426	37.5481	35.2501
715.321	10.0684	27.8095	30.0599	37.4856	35.258
715.821	10.1084	27.7821	30.1693	37.4125	35.2683
716.321	10.1578	27.7548	30.2703	37.3302	35.2776
716.821	10.2106	27.7286	30.3624	37.2397	35.2868
717.321	10.2673	27.7023	30.4439	37.1403	35.2946
717.821	10.3283	27.6789	30.5172	37.0293	35.3
718.32	10.3899	27.6558	30.5853	36.9102	35.3069
718.82	10.4465	27.635	30.6497	36.7814	35.3148
719.32	10.4989	27.6129	30.7091	36.6476	35.3232
719.82	10.545	27.5878	30.7636	36.5107	35.3319
720.32	10.5848	27.5613	30.8088	36.3778	35.3412
720.82	10.6174	27.5326	30.844	36.2509	35.3579
721.32	10.6474	27.5005	30.8689	36.1336	35.3854
721.82	10.6784	27.4668	30.8872	36.022	35.4227
722.319	10.7129	27.4291	30.9013	35.9214	35.469
722.819	10.7481	27.3888	30.9131	35.8344	35.5242
723.319	10.7869	27.347	30.9236	35.7603	35.5912
723.819	10.8285	27.3046	30.9336	35.7075	35.673
724.319	10.8685	27.2626	30.9398	35.6791	35.7653
724.819	10.9075	27.2218	30.9404	35.6805	35.8675
725.319	10.9452	27.1812	30.9361	35.7034	35.9831
725.819	10.9791	27.1397	30.9257	35.7424	36.1112
726.318	11.0063	27.0951	30.9071	35.7856	36.2513
726.818	11.0257	27.0462	30.8815	35.8319	36.4015
727.318	11.0382	26.9918	30.8513	35.8781	36.5585
727.818	11.0521	26.9339	30.8155	35.9208	36.7184
728.318	11.0588	26.872	30.7799	35.9509	36.8802
728.818	11.055	26.8075	30.7435	35.977	37.043
729.318	11.0432	26.7471	30.7055	35.9956	37.2102
729.818	11.0221	26.6953	30.6669	36.0121	37.381
730.317	10.991	26.657	30.6295	36.0271	37.5506
730.817	10.9576	26.6359	30.5968	36.0425	37.7152
731.317	10.9259	26.636	30.5694	36.0482	37.8806
731.817	10.8916	26.6594	30.5437	36.0533	38.0479
732.317	10.8558	26.7023	30.5165	36.0571	38.2155
732.817	10.8218	26.7625	30.4846	36.0644	38.3881
733.317	10.7952	26.8292	30.4464	36.0664	38.5592
733.817	10.7766	26.9009	30.3977	36.0742	38.734
734.316	10.7634	26.9722	30.337	36.0769	38.9145
734.816	10.7537	27.0528	30.2646	36.0841	39.0974
735.316	10.7517	27.136	30.1788	36.0847	39.2772
735.816	10.7545	27.2163	30.0794	36.0833	39.4509
736.316	10.7612	27.3012	29.9666	36.0787	39.6182
736.816	10.7708	27.389	29.839	36.0754	39.7727
737.316	10.7834	27.4787	29.6955	36.0744	39.9209
737.816	10.7975	27.5629	29.5391	36.073	40.0594
738.315	10.8089	27.6386	29.3674	36.0721	40.1845
738.815	10.8202	27.7067	29.1797	36.0694	40.3008
739.315	10.8342	27.7699	28.9765	36.0649	40.3931
739.815	10.8448	27.8256	28.7632	36.0554	40.4645
740.315	10.852	27.8719	28.5454	36.0511	40.5325
740.815	10.8544	27.9135	28.3328	36.0476	40.5973
741.315	10.8548	27.9523	28.14	36.0441	40.6541
741.815	10.8538	27.9892	27.9669	36.0402	40.7007
742.314	10.8511	28.0237	27.8217	36.0374	40.7397
742.814	10.8463	28.049	27.7077	36.0365	40.7676
743.314	10.8376	28.0649	27.6254	36.0424	40.7959
743.814	10.8259	28.0791	27.5677	36.0525	40.8339
744.314	10.8143	28.0965	27.5419	36.0646	40.8887
744.814	10.8017	28.1151	27.5235	36.0792	40.9502
745.314	10.7953	28.127	27.5171	36.0901	41.0197
745.814	10.7909	28.1373	27.5245	36.0974	41.0885
746.313	10.7847	28.1476	27.5442	36.1001	41.1547
746.813	10.7774	28.1554	27.5698	36.0989	41.2145
747.313	10.7628	28.1598	27.5989	36.0976	41.269
747.813	10.7413	28.1589	27.6341	36.0986	41.3108
748.313	10.7161	28.1563	27.6794	36.098	41.3491
748.813	10.6877	28.1552	27.7318	36.0987	41.3948
749.313	10.6629	28.1533	27.7877	36.0984	41.4325
749.813	10.6397	28.151	27.8458	36.0946	41.4692
750.312	10.617	28.153	27.9054	36.0886	41.5
750.812	10.5908	28.1576	27.9679	36.0795	41.5209
751.312	10.5605	28.1638	28.0303	36.0664	41.5373
751.812	10.5311	28.1678	28.0941	36.0481	41.5459
752.312	10.5044	28.1697	28.157	36.0236	41.5507
752.812	10.4819	28.1726	28.217	35.9947	41.5605
753.312	10.4634	28.1772	28.2733	35.9584	41.5678
753.812	10.446	28.1813	28.3256	35.9155	41.5731
754.311	10.4295	28.1844	28.381	35.8654	41.5729
754.811	10.4135	28.1884	28.4393	35.8094	41.5751
755.311	10.4026	28.1926	28.4992	35.7466	41.5817
755.811	10.3974	28.1934	28.5609	35.6811	41.5954
756.311	10.3946	28.1924	28.628	35.6114	41.6102
756.811	10.3952	28.1917	28.7003	35.5411	41.6233
757.311	10.3936	28.1886	28.7789	35.4736	41.6335
757.811	10.3931	28.1846	28.864	35.4039	41.636
758.31	10.3962	28.1766	28.9498	35.3326	41.635
758.81	10.4021	28.169	29.0336	35.2545	41.6314
759.31	10.4082	28.1586	29.1129	35.1736	41.6295
759.81	10.4172	28.1492	29.1869	35.0837	41.6287
760.31	10.4298	28.1394	29.2526	34.9888	41.6273
760.81	10.4408	28.1288	29.3091	34.8884	41.6256
761.31	10.451	28.1178	29.3551	34.7817	41.6251
761.81	10.4566	28.1064	29.3925	34.6715	41.6244
762.309	10.4589	28.0957	29.4245	34.5608	41.6241
762.809	10.4529	28.0817	29.4501	34.4571	41.6287
763.309	10.4397	28.0683	29.4736	34.3646	41.6369
763.809	10.426	28.0537	29.5019	34.2805	41.6486
764.309	10.4104	28.038	29.5318	34.2115	41.6583
764.809	10.3963	28.0198	29.5619	34.1547	41.6702
765.309	10.3866	28.0018	29.5899	34.1058	41.6782
765.809	10.3863	27.9835	29.6151	34.0693	41.6803
766.308	10.3916	27.963	29.6366	34.0405	41.6767
766.808	10.3986	27.9416	29.6515	34.0197	41.6729
767.308	10.4117	27.9196	29.6616	33.9998	41.667
767.808	10.4259	27.8949	29.6659	33.9763	41.6611
768.308	10.4363	27.8676	29.6703	33.9538	41.6543
768.808	10.4418	27.8349	29.6739	33.9317	41.6457
769.308	10.4424	27.7945	29.6752	33.9084	41.6374
769.808	10.4414	27.7515	29.6706	33.8845	41.6267
770.307	10.4407	27.7093	29.6615	33.8625	41.6175
770.807	10.4393	27.6667	29.6481	33.8419	41.6088
771.307	10.4317	27.6305	29.63	33.8226	41.5982
771.807	10.4198	27.5981	29.611	33.8109	41.5859
772.307	10.4067	27.569	29.5911	33.8009	41.5688
772.807	10.3929	27.543	29.5751	33.7998	41.5486
773.307	10.3783	27.5218	29.5605	33.8052	41.5212
773.807	10.3634	27.512	29.5442	33.8152	41.4852
774.306	10.3476	27.5117	29.5254	33.8283	41.4394
774.806	10.3299	27.5211	29.5055	33.8412	41.3789
775.306	10.3136	27.5311	29.4916	33.8516	41.2983
775.806	10.2966	27.543	29.4782	33.8541	41.1983
776.306	10.2809	27.5674	29.4643	33.8547	41.0718
776.806	10.2649	27.5865	29.4501	33.852	40.9188
777.306	10.2469	27.5971	29.4373	33.8498	40.7422
777.806	10.2248	27.6006	29.4242	33.847	40.5476
778.305	10.2041	27.5964	29.4097	33.8438	40.3477
778.805	10.185	27.5902	29.3916	33.8371	40.146
779.305	10.1715	27.5837	29.3722	33.8299	39.93
779.805	10.1655	27.5791	29.3487	33.8235	39.7074
780.305	10.163	27.5748	29.3225	33.817	39.4806
780.805	10.1651	27.5781	29.298	33.8094	39.2589
781.305	10.1643	27.59	29.2781	33.8014	39.0535
781.805	10.1624	27.6076	29.2602	33.7949	38.8682
782.304	10.1558	27.625	29.2468	33.7844	38.6991
782.804	10.1417	27.6477	29.2417	33.7714	38.5535
783.304	10.1216	27.6701	29.2497	33.7546	38.424
783.804	10.0993	27.693	29.2705	33.7382	38.321
784.304	10.0807	27.7159	29.2965	33.7202	38.2378
784.804	10.0662	27.7368	29.3293	33.7009	38.1653
785.304	10.0562	27.7536	29.3704	33.6856	38.0973
785.804	10.0528	27.7684	29.4176	33.669	38.0336
786.303	10.0549	27.7799	29.4661	33.6517	37.9736
786.803	10.0623	27.7921	29.5133	33.6326	37.9241
787.303	10.0725	27.8084	29.5646	33.6073	37.879
787.803	10.0847	27.8204	29.6168	33.5764	37.8394
788.303	10.0957	27.8307	29.6701	33.5373	37.8102
788.803	10.1066	27.84	29.722	33.4918	37.783
789.303	10.1129	27.8454	29.7767	33.4389	37.7618
789.803	10.122	27.8446	29.8355	33.3789	37.7376
790.302	10.1286	27.838	29.8996	33.3131	37.7116
790.802	10.1375	27.8273	29.9684	33.2435	37.6807
791.302	10.1421	27.817	30.0452	33.1698	37.6477
791.802	10.1464	27.8065	30.1298	33.0927	37.6118
792.302	10.1498	27.7975	30.2146	33.01	37.5744
792.802	10.1507	27.7859	30.3074	32.9206	37.5356
793.302	10.1504	27.7751	30.4037	32.8297	37.4924
793.802	10.1502	27.7648	30.5023	32.7348	37.4395
794.301	10.1504	27.7568	30.6018	32.6396	37.3838
794.801	10.15	27.7535	30.6966	32.5472	37.324
795.301	10.1458	27.7485	30.7884	32.4564	37.2558
795.801	10.1442	27.745	30.8823	32.3702	37.1806
796.301	10.1397	27.7429	30.9781	32.279	37.0916
796.801	10.1356	27.7397	31.0755	32.1944	36.9942
797.301	10.134	27.7379	31.1783	32.118	36.8908
797.801	10.1369	27.737	31.2834	32.052	36.7925
798.3	10.1464	27.741	31.3926	31.9979	36.6932
798.8	10.1598	27.7492	31.5006	31.9668	36.5895
799.3	10.1785	27.754	31.6108	31.9484	36.4888
799.8	10.1983	27.7559	31.7219	31.9501	36.3883
800.3	10.2193	27.7547	31.8326	31.977	36.284
800.8	10.2364	27.7545	31.9419	32.0241	36.1778
801.3	10.2501	27.7539	32.0509	32.087	36.0691
801.8	10.2546	27.7472	32.1603	32.1621	35.9621
802.299	10.2514	27.739	32.2666	32.245	35.8575
802.799	10.2402	27.7273	32.3671	32.3323	35.7569
803.299	10.2213	27.7125	32.4623	32.4196	35.6663
803.799	10.1962	27.6963	32.5471	32.5054	35.592
804.299	10.1734	27.6828	32.6169	32.5946	35.5361
804.799	10.1621	27.6726	32.6735	32.6992	35.4951
805.299	10.1581	27.6655	32.7196	32.8158	35.4639
805.799	10.1592	27.6593	32.7602	32.9505	35.4369
806.298	10.156	27.6528	32.7923	33.1029	35.4141
806.798	10.152	27.6453	32.8198	33.2594	35.3943
807.298	10.1461	27.6383	32.8409	33.4236	35.3754
807.798	10.1361	27.6357	32.8562	33.5905	35.3561
808.298	10.1232	27.6334	32.868	33.7638	35.3358
808.798	10.1077	27.6378	32.8742	33.9361	35.3128
809.298	10.0957	27.6435	32.8802	34.1085	35.2923
809.798	10.0946	27.6527	32.8828	34.2745	35.2775
810.297	10.1042	27.6625	32.8799	34.4368	35.2638
810.797	10.1192	27.6783	32.87	34.5972	35.2511
811.297	10.1391	27.6932	32.8552	34.7552	35.2383
811.797	10.1596	27.7132	32.8371	34.9197	35.2264
812.297	10.1812	27.733	32.8166	35.0831	35.2162
812.797	10.2015	27.7556	32.7948	35.2574	35.2035
813.297	10.2247	27.7771	32.774	35.4375	35.194
813.797	10.2455	27.7953	32.7487	35.6203	35.1824
814.296	10.268	27.8091	32.7194	35.801	35.1702
814.796	10.2916	27.818	32.6864	35.9805	35.1548
815.296	10.3111	27.8218	32.6491	36.1574	35.1387
815.796	10.3298	27.822	32.6082	36.3292	35.1215
816.296	10.3546	27.8184	32.5658	36.4962	35.1
816.796	10.3894	27.8067	32.5237	36.658	35.0759
817.296	10.4364	27.7881	32.4814	36.8132	35.0514
817.796	10.4946	27.7615	32.4389	36.9588	35.0279
818.295	10.5652	27.7262	32.3946	37.0979	35.0046
818.795	10.642	27.682	32.3449	37.2305	34.9807
819.295	10.7242	27.6282	32.2894	37.3635	34.957
819.795	10.8087	27.5683	32.2264	37.4951	34.9331
820.295	10.8899	27.5011	32.1556	37.6228	34.9094
820.795	10.9665	27.4273	32.0763	37.7437	34.8807
821.295	11.0393	27.3467	31.9844	37.8587	34.8456
821.795	11.103	27.2623	31.8798	37.9678	34.8041
822.294	11.1563	27.1744	31.7636	38.0685	34.7573
822.794	11.1952	27.0854	31.6365	38.1638	34.7035
823.294	11.221	26.9928	31.4981	38.2463	34.6485
823.794	11.233	26.8946	31.3527	38.3203	34.5909
824.294	11.2439	26.7925	31.2005	38.3892	34.5303
824.794	11.2514	26.6872	31.0426	38.4549	34.464
825.294	11.2597	26.5773	30.8776	38.5145	34.3903
825.794	11.263	26.4609	30.7052	38.5657	34.3114
826.293	11.2608	26.3348	30.5244	38.6147	34.2288
826.793	11.2565	26.1976	30.3354	38.6596	34.142
827.293	11.2518	26.049	30.1381	38.7034	34.0485
827.793	11.2536	25.8923	29.9331	38.7464	33.951
828.293	11.2652	25.7312	29.7216	38.7859	33.8482
828.793	11.2857	25.5686	29.5075	38.8143	33.7447
829.293	11.3128	25.4029	29.2892	38.8306	33.6373
829.793	11.3465	25.2464	29.0698	38.8392	33.5263
830.292	11.3802	25.0994	28.8529	38.8465	33.4171
830.792	11.4186	24.9687	28.6421	38.8527	33.3231
831.292	11.4612	24.8481	28.4392	38.8608	33.2398
831.792	11.5126	24.7377	28.2541	38.869	33.1637
832.292	11.5763	24.6385	28.0858	38.8772	33.0944
832.792	11.6588	24.5474	27.9368	38.8926	33.0291
833.292	11.7575	24.4637	27.8088	38.9089	32.9664
833.792	11.8762	24.3827	27.7052	38.9243	32.9031
834.291	12.0094	24.3052	27.6213	38.9433	32.8421
834.791	12.1596	24.23	27.5571	38.9672	32.7836
835.291	12.3235	24.1561	27.5067	38.9889	32.7309
835.791	12.5	24.0829	27.4726	39.0095	32.6841
836.291	12.6897	24.0108	27.459	39.0332	32.6394
836.791	12.893	23.939	27.4677	39.0622	32.5946
837.291	13.1078	23.8702	27.4951	39.0915	32.5467
837.791	13.3289	23.8052	27.5383	39.1198	32.5064
838.29	13.5585	23.7454	27.5942	39.1496	32.4714
838.79	13.7963	23.6902	27.6622	39.1763	32.4388
839.29	14.0388	23.6361	27.742	39.2033	32.4093
839.79	14.2823	23.5839	27.826	39.2278	32.386
840.29	14.5284	23.5359	27.9193	39.2499	32.3718
840.79	14.7805	23.4913	28.0222	39.2677	32.3651
841.29	15.0372	23.4542	28.1344	39.2802	32.3608
841.79	15.2899	23.4234	28.2528	39.2895	32.3591
842.289	15.5365	23.3979	28.3792	39.2927	32.3565
842.789	15.7719	23.3771	28.5111	39.2921	32.3514
843.289	15.9969	23.3596	28.6464	39.2868	32.3445
843.789	16.2092	23.3489	28.779	39.2759	32.3414
844.289	16.4067	23.3463	28.9093	39.2588	32.345
844.789	16.5903	23.3497	29.0346	39.2347	32.3541
845.289	16.758	23.3595	29.1561	39.2053	32.3635
845.789	16.9135	23.377	29.2713	39.1713	32.3753
846.288	17.0591	23.4039	29.3804	39.1347	32.3965
846.788	17.1972	23.4377	29.484	39.0952	32.4233
847.288	17.3238	23.4803	29.5797	39.0503	32.4595
847.788	17.4418	23.5365	29.6642	39.0011	32.4985
848.288	17.5537	23.6066	29.7361	38.9482	32.5427
848.788	17.6584	23.6871	29.7938	38.8869	32.5907
849.288	17.7592	23.7726	29.8397	38.8139	32.6352
849.788	17.8532	23.8593	29.8787	38.7269	32.6776
850.287	17.9414	23.9476	29.9101	38.6271	32.7198
850.787	18.0248	24.0404	29.9322	38.5168	32.7566
851.287	18.11	24.1355	29.9553	38.3957	32.7899
851.787	18.1932	24.2264	29.9759	38.2638	32.8142
852.287	18.2754	24.3048	29.9905	38.1212	32.8409
852.787	18.3545	24.3743	30.0002	37.9695	32.8696
853.287	18.4375	24.4335	30.0099	37.8101	32.8953
853.787	18.5237	24.4851	30.0165	37.6408	32.9228
854.286	18.6122	24.5227	30.0219	37.4632	32.964
854.786	18.7045	24.5492	30.0244	37.2799	33.0036
855.286	18.7937	24.5753	30.0241	37.092	33.0404
855.786	18.8807	24.6038	30.0241	36.8981	33.0745
856.286	18.9595	24.634	30.0208	36.6906	33.1139
856.786	19.0343	24.6601	30.0204	36.4665	33.1568
857.286	19.11	24.691	30.0254	36.2237	33.2007
857.786	19.1857	24.7203	30.0331	35.9621	33.2442
858.285	19.2646	24.7503	30.0367	35.6818	33.2809
858.785	19.3488	24.7836	30.0374	35.3868	33.3137
859.285	19.4338	24.816	30.0313	35.0742	33.3381
859.785	19.5165	24.8436	30.0211	34.7387	33.3519
860.285	19.5888	24.8667	30.0043	34.3752	33.3567
860.785	19.6545	24.8865	29.9853	33.9927	33.3607
861.285	19.713	24.9025	29.9637	33.5868	33.3669
861.785	19.7611	24.9109	29.9386	33.1726	33.3762
862.284	19.8022	24.9159	29.9123	32.7439	33.3838
862.784	19.8358	24.9248	29.8836	32.3264	33.3914
863.284	19.8732	24.9332	29.8512	31.9309	33.3956
863.784	19.9078	24.9418	29.8149	31.5598	33.3959
864.284	19.9349	24.9524	29.7764	31.2407	33.3889
864.784	19.9608	24.9642	29.7388	31.0124	33.3805
865.284	19.9853	24.9769	29.7	30.8597	33.3735
865.784	20.0094	24.9887	29.6637	30.7407	33.3675
866.283	20.0314	24.9987	29.634	30.6596	33.3634
866.783	20.0525	25.0074	29.6102	30.62	33.3621
867.283	20.0755	25.0178	29.5908	30.6118	33.3623
867.783	20.0954	25.0301	29.5743	30.6222	33.3637
868.283	20.1152	25.0454	29.5638	30.6467	33.368
868.783	20.1329	25.0624	29.5543	30.6778	33.3807
869.283	20.1441	25.0823	29.5454	30.7123	33.3948
869.783	20.151	25.1005	29.5335	30.7567	33.41
870.282	20.1545	25.1174	29.5162	30.8178	33.4223
870.782	20.1583	25.1323	29.4979	30.8905	33.4332
871.282	20.1689	25.1451	29.4795	30.9722	33.4422
871.782	20.1856	25.1541	29.4638	31.0575	33.4518
872.282	20.2061	25.1589	29.4495	31.1457	33.459
872.782	20.2296	25.1618	29.4332	31.2327	33.4688
873.282	20.2527	25.1626	29.4144	31.3208	33.4732
873.782	20.2728	25.1616	29.3913	31.3978	33.4794
874.281	20.2876	25.163	29.3641	31.4665	33.4908
874.781	20.2973	25.1632	29.3355	31.524	33.5015
875.281	20.3066	25.1592	29.3072	31.5689	33.5094
875.781	20.3149	25.1532	29.276	31.5967	33.5162
876.281	20.3264	25.1449	29.2413	31.6177	33.527
876.781	20.3415	25.1327	29.2022	31.6382	33.5363
877.281	20.3585	25.1161	29.1575	31.6539	33.5436
877.781	20.3795	25.0969	29.1063	31.666	33.5471
878.28	20.403	25.0732	29.0495	31.6726	33.547
878.78	20.4243	25.0443	28.9867	31.6797	33.5445
879.28	20.4442	25.012	28.9188	31.6809	33.5409
879.78	20.4617	24.9749	28.8424	31.6806	33.5302
880.28	20.4783	24.9308	28.7595	31.6693	33.5155
880.78	20.5007	24.8801	28.6704	31.6506	33.4959
881.28	20.5305	24.8247	28.5735	31.6299	33.4688
881.78	20.5652	24.7657	28.4655	31.6089	33.4358
882.279	20.6036	24.7035	28.3472	31.5887	33.4009
882.779	20.6497	24.6343	28.2191	31.5752	33.3643
883.279	20.6958	24.5592	28.0857	31.5603	33.3279
883.779	20.7446	24.4782	27.947	31.5423	33.2864
884.279	20.7926	24.3905	27.8015	31.5272	33.2414
884.779	20.8423	24.2956	27.6509	31.5159	33.1927
885.279	20.8901	24.1923	27.4997	31.5093	33.1402
885.779	20.9387	24.0817	27.3555	31.5051	33.083
886.278	20.987	23.965	27.2195	31.5071	33.0267
886.778	21.0335	23.8435	27.089	31.5129	32.9721
887.278	21.072	23.7187	26.9672	31.5161	32.9193
887.778	21.1056	23.5906	26.8597	31.5128	32.8671
888.278	21.1332	23.4598	26.7653	31.5011	32.8195
888.778	21.1565	23.3275	26.6794	31.4828	32.7717
889.278	21.175	23.1976	26.6073	31.4608	32.7307
889.778	21.1899	23.0718	26.5487	31.4348	32.6985
890.277	21.2003	22.9503	26.5016	31.4056	32.6678
890.777	21.2128	22.8346	26.4629	31.3723	32.6398
891.277	21.2198	22.7234	26.4283	31.3363	32.6168
891.777	21.2279	22.6193	26.397	31.3017	32.5971
892.277	21.2361	22.5282	26.3742	31.268	32.581
892.777	21.2411	22.4464	26.3574	31.2321	32.5648
893.277	21.249	22.3724	26.3464	31.1936	32.5499
893.777	21.2584	22.3045	26.3457	31.1524	32.5438
894.276	21.2695	22.2461	26.3546	31.1073	32.5467
894.776	21.2815	22.1965	26.3739	31.0604	32.5493
895.276	21.2956	22.1577	26.4026	31.0141	32.5504
895.776	21.3166	22.1281	26.436	30.9709	32.549
896.276	21.3405	22.1045	26.4687	30.927	32.5451
896.776	21.3664	22.0864	26.496	30.8826	32.5382
897.276	21.3856	22.071	26.5206	30.8375	32.5274
897.776	21.3978	22.0589	26.5409	30.7926	32.5191
898.275	21.3978	22.051	26.5554	30.7466	32.5153
898.775	21.3853	22.0448	26.5648	30.7007	32.5157
899.275	21.3623	22.0421	26.5723	30.6521	32.5187
899.775	21.3343	22.0423	26.5786	30.5972	32.5208
900.275	21.3003	22.0456	26.5834	30.5376	32.5252
900.775	21.2627	22.0559	26.5866	30.47	32.5322
901.275	21.2242	22.0668	26.591	30.3952	32.5409
901.775	21.1904	22.0819	26.6008	30.3123	32.5537
902.274	21.1625	22.0985	26.6124	30.2248	32.5654
902.774	21.1358	22.1089	26.6266	30.1334	32.5767
903.274	21.1221	22.1141	26.6458	30.0377	32.5933
903.774	21.1239	22.1178	26.6689	29.9394	32.6088
904.274	21.1376	22.1208	26.6969	29.8358	32.62
904.774	21.164	22.1209	26.7316	29.7243	32.6291
905.274	21.2017	22.121	26.7756	29.6046	32.6352
905.774	21.2456	22.1221	26.8262	29.4805	32.6346
906.273	21.296	22.1271	26.8835	29.3552	32.6336
906.773	21.3548	22.1349	26.9423	29.2305	32.6306
907.273	21.4201	22.1468	27.0048	29.1042	32.6241
907.773	21.4911	22.1649	27.0623	28.9701	32.6123
908.273	21.5628	22.1878	27.1169	28.8291	32.5966
908.773	21.631	22.2133	27.16	28.6787	32.5737
909.273	21.6959	22.2402	27.1879	28.5229	32.5486
909.773	21.7617	22.2664	27.2001	28.3654	32.5205
910.272	21.8332	22.2909	27.201	28.208	32.4946
910.772	21.9098	22.313	27.2008	28.0549	32.469
911.272	21.9939	22.3314	27.2113	27.9114	32.4399
911.772	22.084	22.3441	27.2274	27.7718	32.4065
912.272	22.1775	22.3516	27.2586	27.6423	32.3657
912.772	22.2739	22.3538	27.2982	27.5264	32.3192
913.272	22.3711	22.3516	27.349	27.4163	32.2673
913.772	22.4689	22.3444	27.4106	27.3092	32.2091
914.271	22.5693	22.3318	27.4909	27.2074	32.1459
914.771	22.6705	22.3106	27.584	27.112	32.077
915.271	22.7724	22.2813	27.6811	27.0211	32.0025
915.771	22.8716	22.2501	27.7778	26.9327	31.9234
916.271	22.9666	22.2184	27.8733	26.8476	31.8375
916.771	23.0548	22.1848	27.9618	26.7666	31.7421
917.271	23.1348	22.1517	28.0379	26.6874	31.6351
917.771	23.2105	22.124	28.1004	26.6116	31.5174
918.27	23.2806	22.1027	28.151	26.5345	31.3959
918.77	23.3448	22.0854	28.1872	26.4581	31.265
919.27	23.4051	22.0725	28.2111	26.3761	31.1324
919.77	23.4623	22.0622	28.2317	26.2934	30.9999
920.27	23.5086	22.0574	28.249	26.2074	30.8691
920.77	23.5471	22.0597	28.2637	26.1155	30.744
921.27	23.5814	22.0643	28.2757	26.0159	30.6214
921.77	23.6084	22.0705	28.2827	25.9079	30.508
922.269	23.6341	22.0737	28.2802	25.7884	30.3968
922.769	23.6563	22.073	28.2743	25.6615	30.2926
923.269	23.6783	22.0676	28.2638	25.5305	30.2006
923.769	23.6881	22.0626	28.2495	25.3987	30.1163
924.269	23.6953	22.0588	28.2292	25.2643	30.0426
924.769	23.6933	22.0569	28.2021	25.1272	29.9877
925.269	23.6791	22.0582	28.1668	24.9898	29.9462
925.769	23.6519	22.0611	28.1338	24.8578	29.9135
926.268	23.6182	22.0649	28.1075	24.7337	29.8875
926.768	23.5861	22.0682	28.0866	24.6155	29.8657
927.268	23.5576	22.0698	28.0673	24.4979	29.8513
927.768	23.5321	22.0664	28.0507	24.3818	29.8383
928.268	23.5116	22.0533	28.0319	24.2655	29.827
928.768	23.4954	22.0381	28.009	24.152	29.8137
929.268	23.4796	22.0214	27.976	24.0437	29.7967
929.768	23.4629	22.0117	27.9283	23.94	29.7761
930.267	23.4455	22.0075	27.865	23.8349	29.7492
930.767	23.4176	22.0082	27.788	23.7289	29.7145
931.267	23.3776	22.0092	27.7034	23.6269	29.6745
931.767	23.3239	22.0079	27.6121	23.5325	29.6304
932.267	23.2566	22.007	27.5147	23.4494	29.5779
932.767	23.1814	22.004	27.4133	23.3715	29.5201
933.267	23.1006	21.9984	27.3087	23.3026	29.4551
933.767	23.0169	21.987	27.1989	23.2407	29.382
934.266	22.9375	21.9728	27.0872	23.1923	29.3024
934.766	22.8614	21.9599	26.9755	23.1608	29.2181
935.266	22.7831	21.9496	26.8724	23.1444	29.1284
935.766	22.7086	21.9386	26.7792	23.1395	29.0337
936.266	22.6377	21.9296	26.6978	23.1472	28.9389
936.766	22.5695	21.9218	26.633	23.1644	28.8461
937.266	22.5052	21.913	26.5831	23.1925	28.7562
937.766	22.4424	21.9028	26.5459	23.2319	28.6646
938.265	22.3844	21.8897	26.5202	23.2784	28.576
938.765	22.332	21.8734	26.5036	23.3299	28.4848
939.265	22.2886	21.8552	26.4927	23.3881	28.397
939.765	22.2508	21.8328	26.487	23.4517	28.3112
940.265	22.219	21.8055	26.495	23.5187	28.2296
940.765	22.1921	21.777	26.5144	23.5904	28.1575
941.265	22.1684	21.7474	26.544	23.6675	28.0988
941.765	22.1483	21.7146	26.5764	23.748	28.0604
942.264	22.1322	21.6786	26.6125	23.839	28.0465
942.764	22.1153	21.6404	26.6497	23.939	28.0489
943.264	22.1037	21.6014	26.6899	24.0518	28.0705
943.764	22.0978	21.56	26.7319	24.1708	28.1065
944.264	22.099	21.5159	26.7756	24.2916	28.1543
944.764	22.1025	21.4669	26.8209	24.4153	28.2127
945.264	22.1066	21.4124	26.8653	24.5411	28.2791
945.764	22.1133	21.3522	26.9057	24.6667	28.3527
946.263	22.1197	21.2868	26.9405	24.7925	28.4312
946.763	22.1203	21.2184	26.9698	24.9146	28.5143
947.263	22.1157	21.1478	26.9931	25.0279	28.596
947.763	22.105	21.0747	27.0148	25.1365	28.6773
948.263	22.0911	20.9973	27.031	25.2369	28.754
948.763	22.0763	20.9135	27.043	25.3269	28.8248
949.263	22.0653	20.8229	27.0538	25.4111	28.8875
949.763	22.0633	20.724	27.0609	25.495	28.942
950.262	22.0642	20.6176	27.0645	25.5725	28.986
950.762	22.0705	20.5047	27.0634	25.653	29.0222
951.262	22.08	20.3825	27.0562	25.738	29.0487
951.762	22.0959	20.2479	27.0446	25.8267	29.0645
952.262	22.1208	20.1019	27.0319	25.9192	29.0602
952.762	22.1487	19.9504	27.0174	26.0147	29.0318
953.262	22.1792	19.8	27.0026	26.1093	28.9808
953.762	22.2068	19.66	26.9837	26.2044	28.9124
954.261	22.2335	19.5363	26.9612	26.2983	28.8429
954.761	22.2543	19.4258	26.9366	26.3922	28.7792
955.261	22.267	19.3325	26.9095	26.4816	28.7248
955.761	22.2717	19.2522	26.8832	26.5662	28.6702
956.261	22.2668	19.1855	26.8547	26.6456	28.6125
956.761	22.2503	19.1364	26.8228	26.7196	28.5481
957.261	22.2257	19.0974	26.7866	26.7855	28.4821
957.761	22.193	19.0676	26.7451	26.8429	28.4112
958.26	22.1466	19.0436	26.6998	26.8983	28.3339
958.76	22.0804	19.0262	26.652	26.9545	28.2464
959.26	21.9948	19.0137	26.6032	27.017	28.1502
959.76	21.9018	19.0042	26.5562	27.078	28.0447
960.26	21.814	18.9991	26.5123	27.1376	27.9327
960.76	21.711	18.9958	26.4663	27.1887	27.8171
961.26	21.6159	18.9954	26.4156	27.232	27.7023
961.76	21.5293	18.9976	26.3578	27.2706	27.5862
962.259	21.4507	19.0042	26.2918	27.3039	27.477
962.759	21.3792	19.018	26.2188	27.3325	27.3767
963.259	21.32	19.0355	26.1377	27.3589	27.2829
963.759	21.2648	19.0607	26.0469	27.382	27.1956
964.259	21.2149	19.0913	25.947	27.4021	27.1096
964.759	21.1648	19.1208	25.8373	27.4148	27.0273
965.259	21.116	19.1478	25.7211	27.4219	26.9487
965.759	21.0713	19.1744	25.6	27.4256	26.8747
966.258	21.0315	19.1956	25.4773	27.4286	26.8099
966.758	20.9954	19.2142	25.3529	27.4318	26.7546
967.258	20.9666	19.2322	25.2284	27.436	26.707
967.758	20.9455	19.2505	25.099	27.4432	26.6678
968.258	20.9305	19.2735	24.9676	27.454	26.6363
968.758	20.9165	19.3028	24.8367	27.4655	26.6104
969.258	20.8972	19.3331	24.7083	27.4764	26.5863
969.758	20.8725	19.3689	24.5893	27.4852	26.5625
970.257	20.8417	19.4133	24.4833	27.4934	26.5412
970.757	20.8054	19.4623	24.3906	27.4993	26.5204
971.257	20.7578	19.5098	24.3112	27.5025	26.4981
971.757	20.7034	19.5521	24.2463	27.5026	26.478
972.257	20.6448	19.5878	24.1973	27.5039	26.4672
972.757	20.5877	19.6177	24.1591	27.5007	26.4628
973.257	20.5336	19.6387	24.1294	27.5001	26.4655
973.757	20.479	19.656	24.1106	27.5015	26.4704
974.256	20.4276	19.6717	24.102	27.5103	26.4794
974.756	20.3695	19.6877	24.1006	27.5258	26.4882
975.256	20.3094	19.6959	24.1019	27.5475	26.4975
975.756	20.2483	19.6943	24.1087	27.573	26.5102
976.256	20.1913	19.6868	24.1211	27.5983	26.5231
976.756	20.1336	19.6767	24.1392	27.6175	26.5383
977.256	20.0726	19.6668	24.1582	27.6336	26.5507
977.756	20.0138	19.6576	24.1817	27.6427	26.5696
978.255	19.9516	19.6483	24.2088	27.6425	26.5908
978.755	19.8942	19.6467	24.2397	27.6336	26.6142
979.255	19.8349	19.6525	24.2739	27.6178	26.6343
979.755	19.7731	19.6642	24.3117	27.5951	26.6516
980.255	19.7056	19.6782	24.351	27.5671	26.6661
980.755	19.6362	19.696	24.392	27.5332	26.6834
981.255	19.5612	19.7168	24.4335	27.4919	26.7069
981.755	19.4787	19.7356	24.4748	27.4475	26.7322
982.254	19.3926	19.7494	24.519	27.3991	26.7582
982.754	19.3061	19.7597	24.561	27.3396	26.7826
983.254	19.2164	19.766	24.6006	27.2712	26.8079
983.754	19.1264	19.7728	24.6418	27.1936	26.834
984.254	19.0347	19.7793	24.68	27.1046	26.8584
984.754	18.9439	19.7825	24.7138	27.007	26.8797
985.254	18.858	19.7807	24.7425	26.901	26.8977
985.754	18.7751	19.7765	24.7647	26.787	26.9177
986.253	18.6925	19.7709	24.784	26.6663	26.938
986.753	18.6147	19.7609	24.7953	26.5362	26.9628
987.253	18.5504	19.7456	24.8021	26.3972	26.9863
987.753	18.4937	19.7261	24.8077	26.2548	27.0102
988.253	18.4417	19.7022	24.8132	26.1033	27.0323
988.753	18.3936	19.6752	24.8153	25.9428	27.0517
989.253	18.3497	19.6463	24.8107	25.7754	27.0705
989.753	18.3113	19.6169	24.8023	25.6031	27.0946
990.252	18.2799	19.5876	24.7963	25.4207	27.1186
990.752	18.2554	19.5603	24.7823	25.2267	27.1463
991.252	18.2418	19.5373	24.761	25.0214	27.1782
991.752	18.241	19.5139	24.7371	24.8073	27.2127
992.252	18.2502	19.4878	24.7135	24.5884	27.2507
992.752	18.2714	19.4583	24.6888	24.3662	27.2878
993.252	18.3029	19.4283	24.6617	24.1461	27.3236
993.752	18.3486	19.3973	24.6342	23.9317	27.3592
994.251	18.4026	19.3672	24.6072	23.7242	27.3941
994.751	18.4642	19.3405	24.5786	23.5342	27.4255
995.251	18.5323	19.318	24.5481	23.3617	27.4568
995.751	18.6011	19.2964	24.5152	23.2135	27.4845
996.251	18.6744	19.271	24.4817	23.0867	27.5065
996.751	18.7495	19.2433	24.458	22.9804	27.5292
997.251	18.8254	19.2141	24.4347	22.8948	27.5526
997.751	18.9033	19.1867	24.4082	22.8302	27.5787
[truncated: 6,004 more rows]
