# Supplementary material for: Ionogel thin films as a compatibilizing pretreatment for electrospray deposition
Source: Royal Society of Chemistry journal article supplement (doi:10.1039/d5lp00359h), 2026-01-01
Supplement: d5lp00359h1.zip [file Porous F data.xlsx]

## Sheet: Sheet1
Lateral	Height Data	Height Data	Height Data	Height Data	Height Data
µm	nm	nm	nm	nm	nm
	F1	F2	F3	F4	F5
0	45.4257	36.5699	153.578	40.8022	55.9142
0.499875	45.4718	36.2464	152.896	40.8418	56.3687
0.99975	44.5245	35.823	151.449	40.325	54.0065
1.49963	43.8471	35.2595	149.879	40.2231	52.3052
1.9995	42.6822	34.6834	147.914	38.3898	51.3706
2.49938	41.6833	33.9294	146.214	38.3349	48.5381
2.99925	40.7608	33.3709	144.011	37.3019	47.0565
3.49913	39.9638	33.0222	142.03	37.2974	45.6008
3.999	39.1243	32.4234	139.854	36.7028	45.2896
4.49888	38.5274	32.1629	138.23	35.2878	44.1208
4.99875	37.8553	31.4865	136.419	35.0719	43.1273
5.49863	37.6283	31.0892	135.157	35.0691	41.1925
5.9985	36.8252	30.6019	133.571	34.2702	40.3646
6.49838	36.2948	30.3861	131.881	34.6335	39.6941
6.99825	35.6749	29.8048	130.22	34.1545	39.162
7.49813	35.3445	29.4704	128.734	32.7836	37.7514
7.998	34.9315	28.8901	127.323	32.5498	36.4678
8.49788	34.4208	28.568	126.131	32.5155	36.3837
8.99775	34.3056	27.8919	125.046	32.6695	35.5393
9.49763	33.9503	27.7463	123.938	31.9778	34.9149
9.9975	33.3282	27.3978	123.043	31.4126	35.5332
10.4974	32.688	27.4639	121.968	32.0036	35.3699
10.9973	32.1754	26.9386	120.93	30.7444	34.3348
11.4971	31.6861	26.685	119.653	30.6083	34.4129
11.997	31.4839	26.222	118.744	30.6668	33.6216
12.4969	31.1975	26.1851	117.187	29.9223	32.9371
12.9968	31.067	25.959	115.967	30.3931	33.4027
13.4966	30.458	26.0298	114.352	30.1186	32.0322
13.9965	30.1188	26.0087	113.105	30.0747	31.819
14.4964	29.8246	25.7388	111.756	30.2645	31.8481
14.9963	29.5875	25.1984	110.562	30.6541	32.1283
15.4961	29.2907	24.8914	109.029	31.1751	31.6375
15.996	29.4436	24.8389	108.662	30.7317	32.3521
16.4959	29.2963	24.2943	106.951	30.2451	32.2587
16.9958	29.2043	24.0132	105.851	28.7067	31.2745
17.4956	29.0395	23.5249	104.259	28.1584	32.3909
17.9955	29.0488	23.5994	102.926	26.6977	31.6026
18.4954	28.8534	23.6271	101.876	26.3938	30.8195
18.9953	28.8199	23.7123	100.737	26.3442	30.0711
19.4951	28.6978	23.3297	99.4959	26.5588	29.3839
19.995	28.7309	23.3385	98.2718	26.0039	28.7713
20.4949	28.4136	22.9903	96.8158	26.6365	28.2283
20.9948	28.2415	22.9001	95.8887	26.4257	28.7429
21.4946	28.1039	22.7003	94.3761	26.2937	27.2726
21.9945	28.0061	22.387	93.4007	25.2238	25.7681
22.4944	27.9507	22.0916	92.3592	24.2323	24.3239
22.9943	27.9379	21.9524	90.9927	23.4005	24.0605
23.4941	27.5874	21.8513	90.184	23.8061	23.0747
23.994	27.5254	21.9096	88.9463	24.4855	23.4109
24.4939	27.5154	21.4891	88.0223	24.3826	24.1246
24.9938	27.552	21.3302	87.0481	24.4398	24.1702
25.4936	27.3738	21.0711	86.1431	23.6409	24.4876
25.9935	27.2236	20.9636	85.1777	22.9767	25.0511
26.4934	27.2357	20.7624	84.2705	23.4896	24.8083
26.9933	27.0407	20.7174	83.1663	24.1872	23.7008
27.4931	26.7638	20.329	82.489	22.9929	25.7523
27.993	26.6672	20.2226	81.236	22.871	24.9612
28.4929	26.8835	20.162	80.5213	22.8949	25.2051
28.9928	27.1465	20.1415	79.353	22.0791	23.5112
29.4926	27.0399	20.0253	78.596	21.4528	22.8915
29.9925	26.5273	19.6744	77.3797	21.0839	24.4608
30.4924	26.1088	19.5872	76.4453	23.0154	23.1978
30.9923	25.8118	19.3931	75.4267	23.195	22.9965
31.4921	25.5318	19.3342	74.5656	22.4432	22.89
31.992	25.4069	18.9046	73.475	22.7053	22.8398
32.4919	25.1912	18.853	72.385	21.9646	21.799
32.9918	25.0032	18.3148	71.1604	21.1785	20.7474
33.4916	24.9647	18.1671	70.1682	19.3756	19.7373
33.9915	24.6913	17.93	68.6483	18.62	18.8273
34.4914	24.2959	18.1038	67.3389	18.0129	18.0693
34.9913	23.7844	17.554	66.131	18.5873	18.5043
35.4911	23.6748	17.5163	64.7768	18.336	18.128
35.991	23.6073	17.2568	63.2777	17.1986	17.8776
36.4909	23.4454	17.0167	61.6485	17.2015	16.7324
36.9908	23.0506	16.6742	60.5453	15.3971	15.6833
37.4906	22.9237	16.8621	59.3693	14.7998	15.7798
37.9905	22.5738	16.454	58.2422	16.4971	16.0469
38.4904	22.2507	16.1815	56.7861	17.4278	15.4423
38.9903	21.9672	15.9338	55.8813	16.384	13.9406
39.4901	22.2381	15.9683	54.6633	15.2501	13.6062
39.99	21.9357	15.6564	53.6184	14.0521	13.5403
40.4899	21.6653	15.4862	52.3718	12.8478	13.765
40.9898	21.4421	15.2124	51.5461	11.7194	14.2715
41.4896	21.2778	15.2108	50.2627	10.7604	14.0118
41.9895	21.4277	14.7294	49.1272	11.0649	14.9335
42.4894	21.5062	14.6386	47.8884	11.6892	13.9908
42.9893	21.3543	14.5797	47.1626	10.5899	14.107
43.4891	21.0686	14.1678	45.8029	10.7349	13.2945
43.989	20.761	14.0262	44.5217	11.1627	13.5343
44.4889	20.5534	13.7918	42.9429	11.8254	12.8524
44.9888	20.1936	13.8389	41.573	11.651	12.2476
45.4886	19.5543	13.4126	39.9327	11.5815	10.7801
45.9885	19.2797	13.3798	38.6651	10.614	10.5279
46.4884	18.7733	13.1262	37.4209	9.76047	11.5902
46.9883	18.5483	13.0206	36.0767	10.0816	11.9444
47.4881	18.2464	12.5634	34.7593	10.594	12.4929
47.988	18.2415	12.6306	33.603	11.2327	12.1741
48.4879	18.0247	12.3511	32.2374	10.9213	10.9357
48.9878	17.8222	12.3291	31.0418	8.60037	10.8122
49.4876	17.2441	11.9302	30.0336	7.32403	10.8771
49.9875	17.1629	11.894	28.7165	8.25359	11.1338
50.4874	16.7123	11.226	27.5898	7.41065	10.5626
50.9873	16.3831	10.9341	26.664	8.70484	11.1519
51.4871	15.8106	10.5597	25.8025	8.08524	10.9093
51.987	15.6313	10.5012	24.8499	7.41343	9.77865
52.4869	15.361	10.2735	23.8985	5.6817	10.7775
52.9868	15.244	10.6222	22.2957	3.93048	9.91775
53.4866	14.7734	10.5288	21.0378	3.28748	10.122
53.9865	14.4413	10.698	19.532	2.86454	9.40187
54.4864	14.1314	10.2265	18.4271	2.69639	8.73116
54.9863	14.0948	9.84106	17.2524	2.79073	8.14986
55.4861	13.6989	9.30969	16.3916	3.13085	7.70208
55.986	13.3053	9.03093	15.2226	2.67763	7.42588
56.4859	12.9256	8.91053	14.2389	2.402	6.33322
56.9858	12.6989	8.71136	13.1999	1.31945	6.42965
57.4856	12.3846	8.56378	12.2336	1.45223	7.73619
57.9855	11.981	8.3495	10.9688	2.8416	8.16994
58.4854	11.9918	8.44806	10.4156	2.40622	5.5871
58.9853	12.0393	8.23019	9.58281	2.01797	4.98703
59.4851	11.72	8.43003	8.81799	1.6615	3.52003
59.985	11.2673	8.16133	7.73275	1.33159	4.24771
60.4849	10.6972	8.15075	6.94615	0.03457	4.23201
60.9848	10.2927	7.77135	5.96499	-1.1867	4.41523
61.4846	10.2174	7.64359	4.90666	-1.2142	3.7774
61.9845	10.4903	7.27982	4.02445	-0.95399	3.30603
62.4844	10.4701	7.31202	3.44406	-1.39933	3.03395
62.9843	10.4979	6.87437	2.39069	-0.54806	2.97256
63.4841	10.304	6.96593	1.58132	-0.39377	4.11365
63.984	10.1237	6.59692	0	0	3.39559
64.4839	9.83324	6.63252	-1.11173	-0.40144	2.72157
64.9838	9.4374	6.45375	-2.09843	0.37512	3.1209
65.4836	9.57961	6.42451	-3.45906	0.32732	1.5999
65.9835	9.52094	6.04325	-4.56061	0.40729	1.15531
66.4834	9.24279	5.93771	-6.12926	-0.38133	0.887286
66.9833	9.11847	5.62651	-7.01664	-0.01366	0.831952
67.4831	9.02959	5.74566	-7.81386	-0.44209	1.01349
67.983	8.7191	5.68214	-8.90991	0.32543	0.435591
68.4829	8.80855	5.67528	-9.69275	0.29134	1.11185
68.9828	8.54576	5.46954	-10.6665	0.39633	1.07449
69.4826	8.41534	5.6849	-12.1031	0.62832	1.29423
69.9825	8.04668	5.56364	-12.6206	-0.03448	1.77521
70.4824	7.82116	5.70728	-13.8347	-0.5965	1.48316
70.9823	7.50681	5.35551	-14.7723	-1.00757	2.37201
71.4821	7.36417	4.99708	-15.8003	-0.22524	3.40496
71.982	7.27523	4.90499	-17.052	-0.25566	2.45372
72.4819	7.48197	4.59579	-18.0263	-1.18198	1.42563
72.9818	7.33597	4.70181	-18.8423	-1.0319	1.37134
73.4816	6.92786	4.73219	-20.0201	-0.81395	0.343758
73.9815	6.50314	4.54637	-21.2088	-1.61399	-0.621489
74.4814	6.20299	4.26265	-22.5383	-2.49512	-1.41718
74.9813	5.92007	4.26627	-23.633	-4.448	-1.9459
75.4811	5.66634	4.06414	-24.8632	-5.41503	-1.13952
75.981	5.57912	4.15086	-26.3584	-6.28016	0
76.4809	5.28888	4.14974	-27.6034	-6.98189	0.353132
76.9808	5.17102	3.91711	-28.9453	-7.46663	-0.224532
77.4806	4.8557	3.69521	-30.2438	-7.69782	-0.815234
77.9805	5.094	3.6164	-31.1032	-7.6616	-1.44097
78.4804	4.88213	3.3075	-32.271	-8.3745	-2.11426
78.9803	4.8204	3.39406	-33.2663	-7.84796	-3.84136
79.4801	4.28082	3.00199	-34.3457	-7.06247	-4.5899
79.98	4.39368	2.99604	-35.3975	-8.07261	-5.27207
80.4799	4.17741	2.63256	-36.679	-8.89589	-5.84541
80.9798	4.12177	2.53014	-38.0669	-8.43012	-7.26143
81.4796	3.85721	2.44993	-39.0423	-7.61253	-7.4397
81.9795	3.76114	2.13898	-40.0903	-6.47523	-8.27254
82.4794	3.5938	1.59971	-40.969	-7.10174	-7.71523
82.9793	3.85988	1.73479	-42.3161	-5.55727	-6.72726
83.4791	3.68092	1.56859	-43.394	-5.85752	-5.37709
83.979	3.41247	1.71943	-44.5717	-6.11161	-5.78663
84.4789	3.31405	1.69084	-45.3562	-6.31474	-5.05541
84.9788	3.52239	1.59711	-46.8885	-7.47206	-5.18957
85.4786	3.40385	1.4389	-47.9377	-6.56509	-6.23348
85.9785	3.44021	1.47099	-49.492	-7.5738	-6.13862
86.4784	3.2542	1.94725	-50.5524	-7.5598	-5.81424
86.9783	2.96476	1.84359	-51.8512	-8.49004	-5.24175
87.4781	2.8315	1.7466	-53.1415	-9.36802	-5.43314
87.978	2.86473	1.52682	-54.4087	-10.1369	-5.41196
88.4779	2.93337	1.4343	-55.6348	-10.7456	-4.16574
88.9778	2.76682	1.22431	-56.9272	-10.1504	-3.72957
89.4776	2.47159	1.27652	-57.8919	-10.3485	-4.19664
89.9775	2.17248	0.84625	-58.7653	-11.4004	-4.57838
90.4774	2.00482	0.81452	-59.8106	-11.2956	-4.81564
90.9773	1.60087	0.45579	-60.7968	-12.0012	-4.84344
91.4771	1.46743	0.65616	-61.6108	-11.5334	-4.60278
91.977	1.24299	0.55423	-62.6481	-11.8837	-4.05212
92.4769	1.17768	0.76195	-63.806	-12.088	-3.17492
92.9768	0.897181	0.64806	-65.0858	-12.1194	-2.98858
93.4766	0.774774	0.56878	-66.4754	-12.9548	-1.51066
93.9765	0.442656	0.39599	-67.4493	-13.5619	-1.75141
94.4764	0.406054	0.62771	-68.4895	-12.8665	-0.756632
94.9763	0.174604	0.50542	-69.2293	-11.8467	-0.497287
95.4761	0.373008	0.25434	-70.3116	-10.5701	-0.00709727
95.976	0	0	-71.5167	-11.1293	1.72316
96.4759	0.172654	-0.24832	-72.7246	-11.5724	1.6515
96.9758	-0.0957	-0.35509	-73.9292	-12.8221	1.69548
97.4756	-0.186503	-0.43814	-75.3722	-11.7702	1.87673
97.9755	-0.209409	-0.62462	-76.409	-10.306	2.20198
98.4754	-0.0377325	-1.04205	-77.3873	-9.48095	2.66221
98.9753	-0.0584538	-1.05383	-78.4279	-9.37554	3.23818
99.4751	0.0823825	-1.14412	-79.6521	-8.02254	2.90144
99.975	-0.131771	-1.31922	-80.545	-7.45099	1.63457
100.475	-0.216753	-1.32582	-81.4636	-7.76484	1.49623
100.975	-0.418041	-1.53319	-82.286	-7.00537	2.5716
101.475	-0.73386	-1.68898	-83.0192	-7.19319	2.83087
101.975	-0.900012	-1.65365	-83.9328	-7.39848	2.16862
102.474	-0.897119	-1.67194	-84.5472	-7.63254	2.55207
102.974	-0.969347	-1.37348	-85.6315	-8.90609	1.99041
103.474	-1.12056	-1.52091	-86.835	-10.2016	0.462596
103.974	-1.22402	-1.50906	-87.8981	-9.41698	0.0491073
104.474	-1.27493	-1.58368	-88.6785	-10.487	-0.122302
104.974	-1.14643	-1.49434	-89.9264	-11.4197	0.00176183
105.474	-1.34528	-1.73941	-90.897	-12.1021	0.441176
105.974	-1.37895	-1.69153	-91.8255	-11.4273	1.17409
106.473	-1.61449	-1.71093	-92.8417	-11.3455	1.1323
106.973	-1.42097	-1.42221	-93.954	-9.88538	2.24446
107.473	-1.54267	-1.58118	-94.9146	-9.08205	1.45636
107.973	-1.36573	-1.44936	-96.1015	-9.04751	0.692748
108.473	-1.64306	-1.6454	-97.0202	-8.82939	0.00448696
108.973	-1.63403	-1.54709	-98.2948	-8.41516	0.45368
109.473	-1.57785	-1.52252	-99.1756	-8.79269	0.0748783
109.973	-1.48097	-1.33228	-100.523	-7.91924	-0.146008
110.472	-1.72924	-1.36438	-101.702	-7.71454	-0.172598
110.972	-1.95097	-1.5122	-102.804	-7.14308	0.0204844
111.472	-1.87628	-1.65167	-103.551	-5.11305	-0.564975
111.972	-1.86875	-1.77499	-104.184	-4.57834	0.073572
112.472	-2.06032	-1.99971	-105.096	-3.53712	-0.0565343
112.972	-1.82249	-1.93962	-105.682	-0.88749	0.985678
113.472	-1.90224	-1.95904	-106.833	1.4195	0.143764
113.972	-1.93969	-2.18843	-107.569	4.36152	0.33274
114.471	-1.93196	-2.12104	-108.765	5.93303	-0.434769
114.971	-2.13238	-2.119	-109.183	8.12988	-0.165379
115.471	-2.04292	-2.1857	-110.454	12.0259	-1.82087
115.971	-2.03828	-2.3204	-111.61	15.6118	-3.3811
116.471	-1.88395	-2.01517	-112.63	18.7697	-2.71142
116.971	-2.2213	-2.02157	-113.755	22.4131	-1.75135
117.471	-2.56223	-1.85987	-114.6	24.4758	-1.61086
117.971	-2.63469	-2.03811	-116.164	26.9164	-1.41128
118.47	-2.66948	-2.19244	-116.817	29.8065	-3.23015
118.97	-3.03972	-2.06438	-117.912	32.1974	-4.08488
119.47	-2.98444	-2.03106	-118.855	35.1276	-4.86816
119.97	-2.98252	-2.11117	-119.776	38.6456	-5.51452
120.47	-3.03781	-2.18949	-121.196	42.7356	-5.95552
120.97	-3.02519	-2.64492	-122.245	45.2971	-6.13435
121.47	-2.94323	-2.71874	-123.531	48.1959	-6.01933
121.97	-3.04859	-2.88822	-124.799	51.356	-5.6117
122.469	-2.72046	-2.89964	-125.648	53.6473	-4.94484
122.969	-2.96539	-3.12325	-127.062	53.9096	-5.0827
123.469	-2.79912	-3.18194	-127.782	56.0711	-6.09171
123.969	-2.96404	-3.31389	-129.033	56.119	-4.95371
124.469	-2.96837	-3.26248	-129.819	55.9513	-5.64323
124.969	-3.05593	-3.3956	-130.496	55.5794	-6.22196
125.469	-2.85245	-3.20977	-131.331	56.0183	-6.64002
125.969	-2.98803	-3.45138	-131.961	54.2467	-4.84353
126.468	-3.10159	-3.25036	-133.014	53.221	-5.84712
126.968	-3.18577	-2.97295	-133.988	51.9941	-6.74455
127.468	-3.2336	-2.764	-134.719	50.5552	-6.46163
127.968	-3.49219	-3.02208	-135.297	48.8907	-5.9629
128.468	-3.45568	-3.00024	-135.704	46.9913	-5.29542
128.968	-3.36409	-3.05193	-136.181	43.8503	-5.52729
129.468	-3.35273	-3.04359	-136.229	42.5041	-7.72523
129.968	-3.43289	-2.83786	-136.605	40.0172	-6.83936
130.467	-3.60692	-2.55639	-136.83	37.3602	-6.76139
130.967	-3.86764	-2.58804	-137.03	34.5655	-7.55358
131.467	-3.82236	-2.44407	-137.58	32.6722	-8.20589
131.967	-3.70525	-2.37206	-137.719	30.7017	-7.64534
132.467	-3.64677	-2.253	-137.791	28.625	-7.82903
132.967	-3.65628	-2.21473	-137.665	25.429	-7.76371
133.467	-3.6122	-2.13505	-137.844	22.1487	-7.40711
133.967	-3.63949	-2.13809	-137.584	20.9172	-7.73967
134.466	-3.73945	-2.0988	-137.382	17.827	-6.74364
134.966	-3.65629	-2.01419	-137.381	16.8887	-5.39472
135.466	-3.50887	-2.01217	-137.462	16.1688	-5.78018
135.966	-3.30272	-1.72067	-137.099	14.5767	-3.97417
136.466	-3.55097	-2.02351	-137.145	13.0136	-4.00756
136.966	-3.5078	-1.93001	-136.962	11.431	-5.01719
137.466	-3.53354	-2.04844	-136.649	9.78995	-3.99662
137.966	-3.25387	-1.8772	-135.703	8.07918	-4.92508
138.465	-3.30066	-2.03421	-135.039	5.32017	-4.84696
138.965	-3.18979	-2.01985	-134.491	2.58971	-5.6956
139.465	-3.54719	-2.06936	-134.64	2.05836	-6.42961
139.965	-3.36538	-1.80063	-134.8	0.85188	-6.94546
140.465	-3.36818	-1.83856	-135.249	0.98086	-6.14819
140.965	-3.30242	-1.56867	-135.755	0.4649	-5.99981
141.465	-3.52949	-1.61695	-136.443	0.2635	-4.53507
141.965	-3.15288	-1.49285	-137.302	0.38721	-4.79097
142.464	-2.7722	-1.56585	-138.17	-0.15923	-3.83605
142.964	-2.52398	-1.45957	-138.991	-0.35209	-3.64481
143.464	-2.16578	-1.29034	-139.571	-0.11542	-4.23353
143.964	-1.95013	-1.18847	-140.21	1.61294	-4.54198
144.464	-1.63281	-1.03773	-140.076	2.83863	-2.45117
144.964	-1.21509	-0.97074	-140.214	3.48292	-0.909937
145.464	-0.835575	-1.12393	-139.566	4.51023	-9.09495e-14
145.964	-0.51726	-0.99838	-138.942	5.91646	0.253263
146.463	-0.156804	-0.83908	-137.687	7.67863	1.90698
146.963	-0.0252959	-1.03589	-136.157	8.76088	3.05716
147.463	-0.142179	-1.09588	-134.236	9.14314	4.76267
147.963	-0.257194	-1.13127	-132.822	9.88609	7.14277
148.463	0.0222951	-1.26192	-130.92	11.0968	9.30292
148.963	-0.0478284	-1.35553	-129.105	13.8514	12.3423
149.463	-0.102564	-1.2729	-127.058	16.1439	16.3724
149.963	-0.131954	-1.38182	-124.415	18.8644	21.4332
150.462	-0.254892	-1.30438	-121.048	19.8923	25.4588
150.962	-0.343157	-1.15372	-117.481	21.0968	30.3141
151.462	-0.141802	-1.05394	-112.895	22.4269	35.8776
151.962	-0.287042	-1.13179	-107.637	23.7985	39.9213
152.462	-0.302453	-1.00516	-102.021	24.0972	43.1781
152.962	-0.572181	-0.78686	-96.558	23.2084	45.4787
153.462	-0.730472	-0.35461	-91.6815	23.103	47.7366
153.962	-1.02191	-0.22507	-87.3271	22.805	48.9622
154.461	-1.44239	-0.04572	-83.1507	20.2818	50.2638
154.961	-1.85052	-0.07334	-79.781	19.5665	50.9142
155.461	-1.84536	0.06271	-76.6727	17.7822	53.3405
155.961	-1.91297	0.11446	-74.1697	17.971	57.1371
156.461	-2.18949	0.32492	-71.7242	15.1785	62.9343
156.961	-2.17364	0.31026	-69.4586	14.3952	70.3877
157.461	-2.35631	0.43328	-66.0108	13.747	82.1187
157.961	-2.73938	0.19124	-59.6385	13.2317	97.6261
158.46	-2.80487	0.08456	-50.0797	11.8306	116.085
158.96	-2.65433	0.00901	-35.8012	10.5344	135.358
159.46	-2.41376	-0.023	-17.3574	10.3912	156.095
159.96	-2.35046	-0.00253	6.71269	9.41174	176.875
160.46	-2.48332	0.20096	35.673	8.55211	195.225
160.96	-2.56476	0.08339	68.3264	8.82585	212.801
161.46	-2.46038	0.13876	102.424	7.21429	230.52
161.96	-2.41969	0.000290981	136.296	6.68541	248.424
162.459	-2.20157	0.17245	168.444	5.30512	267.575
162.959	-2.19074	0.41495	197.59	5.103	286.967
163.459	-2.40155	0.34113	224.567	5.14134	305.395
163.959	-2.32514	0.44476	251.743	4.40647	325.498
164.459	-2.44353	0.48483	278.198	4.90281	343.744
164.959	-2.49925	0.58631	304.381	4.66837	359.349
165.459	-2.34904	0.62408	330.313	3.68979	371.573
165.959	-1.98377	0.97034	355.01	4.02151	378.833
166.458	-2.04226	0.99	375.151	4.72436	381.84
166.958	-1.79189	1.0369	389.815	5.74718	385.716
167.458	-1.73458	0.98438	398.715	5.97662	387.817
167.958	-1.63644	1.0849	402.888	7.28591	392.462
168.458	-1.75471	0.8428	405.398	6.56937	395.959
168.958	-1.5921	0.88771	411.339	4.71629	398.396
169.458	-1.77196	0.98579	421.97	3.80452	401.87
169.958	-1.54787	1.00496	436.135	2.99918	404.431
170.457	-1.78847	1.18352	454.872	2.43137	407.014
170.957	-1.74623	1.13199	475.351	2.22798	408.546
171.457	-1.90116	0.95584	496.193	3.49023	408.929
171.957	-1.74166	0.77897	516.633	4.24247	410.128
172.457	-1.87858	0.4844	534.718	6.41755	410.139
172.957	-1.55839	0.46208	549.03	6.93024	408.907
173.457	-1.39922	0.35452	558.97	6.63452	409.471
173.957	-1.29634	0.29279	563.413	7.50689	407.879
174.456	-1.26266	0.16395	562.591	7.53968	407.097
174.956	-0.930732	0.23219	556.125	7.66014	406.19
175.456	-1.06368	0.13556	544.623	8.83909	405.171
175.956	-1.05409	0.38029	529.775	8.00439	404.069
176.456	-1.1433	0.59729	515.073	7.06383	401.948
176.956	-1.20182	0.77033	503.015	7.07026	400.943
177.456	-1.21934	1.00997	495.039	5.07331	399.27
177.956	-1.31519	0.92549	490.89	4.12866	400.148
178.455	-1.10913	1.13232	491.464	4.40967	400.822
178.955	-1.10034	1.13382	494.969	3.99882	402.428
179.455	-1.05016	1.29943	501.618	3.91416	406.148
179.955	-1.20811	1.25891	509.189	5.2114	409.102
180.455	-1.44488	1.26524	514.917	5.89663	413.342
180.955	-1.23807	1.33479	517.163	5.9109	417.979
181.455	-1.07042	1.4805	516.87	6.26577	425.064
181.955	-0.823316	1.70939	513.105	7.03146	430.563
182.454	-0.87705	2.02164	505.418	8.27739	438.306
182.954	-0.856511	2.15883	492.565	10.0712	445.123
183.454	-0.743558	2.23573	473.787	11.4716	451.668
183.954	-0.274982	2.37841	448.76	13.5476	457.597
184.454	-0.206511	2.84102	418.75	15.3999	461.536
184.954	0.319232	2.86225	386.142	19.111	464.151
185.454	0.418235	3.04645	355.417	22.7333	465.224
185.954	0.689683	3.01747	331.215	27.2007	465.627
186.453	0.627223	3.26962	311.738	31.4259	465.322
186.953	0.848875	3.30096	293.575	35.2733	463.294
187.453	0.732522	3.3479	274.754	37.6272	461.577
187.953	1.14819	3.15866	255.78	41.4367	459.251
188.453	0.841146	3.23851	236.149	44.7039	457.337
188.953	1.04254	3.09939	217.742	47.3321	454.823
189.453	1.01303	3.11772	199.808	50.2444	450.613
189.953	0.864532	3.05287	182.263	54.3769	446.629
190.452	0.729134	3.28366	163.49	55.5887	441.831
190.952	0.372593	3.06001	143.905	56.7105	437.133
191.452	0.570319	3.12841	122.946	56.7319	430.435
191.952	0.218511	3.00609	102.081	57.651	423.619
192.452	0.821968	3.19997	81.8137	58.4779	416.629
192.952	0.891246	3.2189	63.3454	58.1213	408.349
193.452	0.639316	3.30485	45.6281	58.487	399.609
193.952	0.821057	3.5822	28.5663	57.5105	389.216
194.451	0.950631	3.66399	12.8339	55.0989	377.908
194.951	1.01732	3.7818	-0.882549	52.2737	366.396
195.451	1.14052	3.55247	-13.1953	50.1625	352.29
195.951	1.06579	3.72876	-23.7896	47.902	336.119
196.451	1.29164	3.57455	-33.3999	46.5868	316.481
196.951	1.3197	3.71489	-41.9392	45.2925	295.088
197.451	1.26151	3.66111	-49.2129	43.0218	271.856
197.951	1.36685	3.91287	-54.9339	41.7897	246.858
198.45	1.25892	3.8468	-59.7493	39.6268	221.385
198.95	1.43227	4.08087	-64.12	38.4997	194.957
199.45	1.51353	3.86741	-68.6483	37.3831	169.283
199.95	1.11405	4.07888	-72.6578	36.1679	146.268
200.45	0.990146	4.10284	-76.3049	33.736	127.855
200.95	1.17259	4.30659	-79.4988	31.0129	111.84
201.45	0.913284	4.3133	-82.2799	28.033	99.7783
201.95	1.20623	4.6183	-84.831	24.8889	89.0589
202.449	1.30617	4.21855	-87.3485	21.7248	82.8752
202.949	1.18921	4.36343	-90.4048	20.7364	77.2969
203.449	1.10193	4.70831	-93.293	19.101	73.166
203.949	0.932125	4.87112	-96.2613	18.9196	70.3272
204.449	0.568565	4.83702	-98.9256	18.3468	68.5886
204.949	1.16542	4.85847	-101.391	18.5138	65.7274
205.449	1.23668	4.94933	-103.774	19.6165	64.5618
205.949	1.24988	5.24418	-106.444	21.8309	63.0117
206.448	1.45733	5.49233	-108.759	25.2801	61.9638
206.948	1.61282	5.68097	-111.18	30.0056	61.3702
207.448	1.33411	5.80109	-113.178	34.9457	61.1866
207.948	1.63133	5.84856	-114.716	39.9575	60.365
208.448	2.15309	5.94991	-116.54	44.8926	59.8775
208.948	2.00183	6.23515	-118.413	49.6186	59.7578
209.448	2.28173	6.45114	-119.822	53.026	61.05
209.948	2.75142	6.45967	-121.26	57.061	60.774
210.447	2.50836	6.50815	-122.37	62.748	60.938
210.947	2.4046	6.60731	-123.925	67.0241	61.6816
211.447	2.96099	6.76549	-125.202	70.736	64.1602
211.947	2.67083	6.73421	-126.828	74.8103	66.5057
212.447	2.38423	7.14104	-128.057	78.1727	68.7967
212.947	2.63265	7.10777	-129.375	80.7057	72.1723
213.447	2.56083	7.36248	-130.91	83.3141	76.7948
213.947	2.41542	7.39746	-132.028	85.9091	82.761
214.446	2.71798	7.44083	-133.339	87.3475	88.0576
214.946	2.47994	7.35782	-134.341	87.4596	94.586
215.446	2.82444	7.2684	-135.402	87.1272	101.224
215.946	3.13983	6.92687	-136.77	86.2781	108.738
216.446	3.15048	6.8485	-137.8	84.8402	113.831
216.946	3.46553	6.68392	-138.699	82.7609	118.197
217.446	3.58099	6.82285	-139.567	80.0289	122.712
217.946	3.22918	6.6509	-140.262	75.6828	124.308
218.445	3.54725	6.79413	-140.524	71.8407	125.98
218.945	3.55935	6.76281	-140.868	68.7034	129.912
219.445	3.63172	6.92805	-141.34	65.3975	133.211
219.945	3.77115	7.04146	-141.853	63.9785	137.858
220.445	4.10429	7.09436	-142.686	61.4244	139.848
220.945	4.1221	7.20878	-143.479	57.5773	142.189
221.445	4.18755	7.2589	-144.22	54.3552	144.106
221.945	4.05618	7.36633	-144.888	50.7339	146.861
222.444	4.48971	7.40269	-145.453	46.6675	151.762
222.944	4.36932	7.73753	-146.246	41.1573	158.011
223.444	4.68074	7.73422	-146.7	37.2968	165.619
223.944	4.67677	7.62027	-146.708	33.2593	172.423
224.444	4.83778	7.5223	-146.538	29.1427	179.141
224.944	4.90368	7.70321	-145.835	26.0775	184.492
225.444	4.97906	7.54583	-144.362	23.1886	189.203
225.944	4.92375	7.4292	-142.411	21.5453	194.106
226.443	4.6021	7.38077	-140.189	19.1802	197.089
226.943	4.27214	7.67807	-137.174	17.065	199.11
227.443	4.08776	7.70916	-133.984	16.2133	201.316
227.943	3.95133	8.22337	-130.646	14.5885	203.936
228.443	4.00517	8.34409	-127.167	14.0978	207.172
228.943	4.13219	8.6731	-123.525	11.6664	212.147
229.443	4.07381	9.07905	-119.652	10.2068	217.837
229.943	4.07063	9.16305	-115.18	8.74708	220.988
230.442	3.99787	9.15225	-110.194	6.27058	225.281
230.942	4.10653	9.42127	-104.373	4.80594	227.452
231.442	4.02292	9.59317	-97.247	3.44133	228.18
231.942	4.11953	9.52539	-89.241	1.21022	227.293
232.442	3.89918	9.33626	-80.0932	1.18177	225.766
232.942	4.23916	9.41344	-69.866	0.443	223.719
233.442	4.26962	9.39556	-58.6161	-1.02934	221.36
233.942	4.21777	9.40864	-47.044	-1.18306	220.993
234.441	4.20543	9.3344	-35.2329	-0.94096	220.968
234.941	4.35925	9.3063	-25.1124	-1.32092	220.596
235.441	4.17246	9.21169	-17.0223	-0.35426	221.326
235.941	4.13749	9.43787	-10.1975	-0.07651	225.824
236.441	4.13995	9.491	-4.38047	0.40178	231.878
236.941	4.18312	9.7373	0	9.09495e-14	240.316
237.441	4.0189	9.79766	3.44738	-0.35386	252.119
237.941	3.9049	9.91195	6.03184	-0.67165	270.293
238.44	3.98811	9.82888	7.85545	-0.95721	293.621
238.94	4.03243	9.79728	8.66715	-2.21008	324.394
239.44	4.28949	10.3278	9.24353	-3.40229	357.315
239.94	4.37739	10.2844	9.26158	-2.42857	392.438
240.44	4.5244	10.3858	8.6362	-3.23504	422.478
240.94	4.58531	10.2559	7.79375	-3.86027	449.043
241.44	4.78448	10.1416	6.91643	-4.24027	473.125
241.94	4.594	10.0538	5.78397	-3.32785	493.04
242.439	4.36324	10.2536	4.77167	-3.13085	509.426
242.939	3.96881	10.1174	3.23305	-2.72785	526.331
243.439	3.54744	10.1397	1.38147	-3.16666	542.022
243.939	3.12337	10.0837	-1.03744	-3.49103	559.722
244.439	3.10028	10.0836	-3.61069	-3.69409	577.572
244.939	2.99684	9.90218	-6.36807	-2.76584	592.417
245.439	2.80932	10.3061	-8.42138	-3.72662	607.985
245.939	2.41541	10.3038	-10.3637	-4.61808	621.993
246.438	2.45726	10.626	-11.6868	-5.36733	632.992
246.938	2.33001	10.7661	-12.5173	-4.91102	641.566
247.438	2.40934	11.0783	-12.5253	-4.22837	647.449
247.938	2.32565	10.9234	-12.1853	-4.38223	653.537
248.438	2.45203	10.9173	-11.9167	-4.41561	655.849
248.938	2.54086	10.827	-11.4212	-5.2973	658.467
249.438	2.8347	10.7867	-10.9149	-5.95213	660.7
249.938	2.82307	11.1838	-10.7659	-6.23519	662.851
250.437	2.74099	11.3873	-11.0952	-5.01402	665.25
250.937	2.97041	11.3662	-11.4942	-3.22382	669.228
251.437	2.88645	11.3576	-12.5275	-0.92613	673.053
251.937	3.10181	10.9866	-13.6115	-0.26199	677.875
252.437	3.36454	11.0154	-15.1201	0.61141	683.808
252.937	3.40343	11.0948	-16.656	1.62312	689.848
253.437	3.07532	11.0991	-18.035	1.68339	695.897
253.937	2.88803	11.1507	-19.4362	1.72728	701.852
254.436	2.74456	11.1247	-20.7802	1.77396	707.647
254.936	3.16665	11.1453	-21.8387	0.86982	713.299
255.436	3.03062	11.0904	-22.6158	0.10858	718.948
255.936	3.19376	11.3393	-22.3538	0.66248	722.85
256.436	3.03926	11.0151	-22.3082	1.6735	731.421
256.936	3.19472	11.2377	-21.6388	3.18772	741.173
257.436	3.05027	11.2707	-20.1104	4.19198	753.375
257.936	3.36442	11.6004	-17.5309	5.63079	766.225
258.435	3.27581	11.3391	-14.9062	7.44638	781.832
258.935	3.90956	11.348	-11.9275	8.51817	796.285
259.435	3.89324	11.1419	-9.42016	9.6997	811.626
259.935	4.20217	11.3519	-6.33226	9.87175	829.049
260.435	4.2134	11.234	-3.58666	8.91886	847.74
260.935	4.66589	11.4023	-0.997311	8.81617	868.806
261.435	4.80048	11.2302	1.52532	8.59821	891.309
261.935	4.96182	11.3329	4.07438	7.25848	913.226
262.434	5.01226	11.0866	6.97687	5.83593	936.597
262.934	4.94187	10.9831	9.38784	4.45149	959.628
263.434	4.75281	11.0311	11.7875	4.24135	985.626
263.934	4.71089	10.9755	13.2665	4.3168	1010.99
264.434	4.58531	10.8042	13.8998	4.71416	1040.02
264.934	4.76305	10.641	13.683	4.44592	1072.98
265.434	4.6228	10.2421	12.9113	4.525	1109.74
265.934	4.90666	10.2472	11.4256	5.00024	1144.66
266.433	4.98904	10.0491	9.85339	5.8857	1174.77
266.933	4.85017	10.147	7.85021	7.14945	1204.15
267.433	4.61638	10.0431	5.57014	7.70284	1231.1
267.933	4.43323	9.85022	2.93143	8.43045	1256
268.433	4.57829	9.94788	0.86816	9.24597	1275.45
268.933	4.81665	9.58783	-1.56117	9.046	1293.44
269.433	5.13899	9.89747	-4.32474	7.74647	1310.55
269.933	5.02335	9.51527	-7.22935	7.36735	1327.68
270.432	5.33076	9.68789	-9.41652	5.98419	1350.01
270.932	5.06183	9.5655	-11.2687	5.65012	1376.81
271.432	5.21072	9.64766	-13.0774	5.46206	1406.02
271.932	5.29845	9.81915	-14.5113	5.45283	1440.34
272.432	5.32353	10.198	-15.1034	4.63769	1479.27
272.932	5.41433	10.3882	-15.6617	4.03322	1520.94
273.432	5.57456	10.233	-15.7772	4.69808	1564.24
273.932	5.67325	10.0964	-15.6621	4.63758	1605.98
274.431	5.94931	10.6208	-14.9181	5.79647	1646.05
274.931	5.88685	9.80295	-13.6573	5.13341	1693.67
275.431	5.96815	10.6476	-12.7792	4.58111	1744.23
275.931	5.81778	9.81979	-11.8179	4.19204	1795.82
276.431	5.8111	10.8142	-10.6535	4.01485	1845.62
276.931	5.45891	9.9203	-8.79431	5.09169	1897.14
277.431	5.7769	11.2485	-7.15126	5.42309	1954.39
277.931	5.53147	10.9545	-5.28696	4.94531	2017.58
278.43	5.71266	11.5996	-3.99036	4.6564	2084.79
278.93	5.7053	11.6871	-3.02428	5.60165	2160.07
279.43	5.74607	12.0529	-2.0818	5.77531	2240.32
279.93	5.83079	11.6808	-0.312269	6.09812	2327.19
280.43	5.70025	12.1876	1.74329	5.51078	2419.07
280.93	5.59915	11.5831	4.47001	5.94983	2515.08
281.43	5.66301	11.9806	7.18066	5.36677	2613
281.93	5.52357	11.4007	9.72345	4.6686	2713.28
282.429	5.5618	12.0809	11.7757	3.84068	2818.04
282.929	5.41806	11.6532	12.9928	1.90044	2923.93
283.429	5.60499	11.705	13.0471	-0.07245	3021.95
283.929	5.88989	11.3819	12.2962	-0.89959	3113.9
284.429	5.76483	10.688	10.8029	-1.41455	3195.95
284.929	6.10189	10.7902	8.94431	-1.53676	3273.71
285.429	6.28404	10.7315	6.90272	-0.23001	3343.48
285.929	6.67021	11.259	5.14576	0.45678	3410.09
286.428	6.7464	10.8539	2.90514	0.37103	3473.15
286.928	6.86909	11.3603	0.674231	0.398	3532.8
287.428	6.78536	10.8993	-1.37985	0.46357	3592.62
287.928	6.99456	11.1917	-2.44498	-0.51353	3662.39
288.428	7.24986	10.4952	-2.84546	-1.58306	3737.34
288.928	7.28302	10.6794	-2.58071	-2.71409	3817.35
289.428	7.07612	10.2758	-1.80139	-3.85553	3902.14
289.928	7.13264	10.5332	-0.802328	-4.94435	3978.21
290.427	6.96456	10.3438	0.494624	-4.90796	4039.4
290.927	7.07748	10.1976	3.05905	-6.70977	4087.11
291.427	6.85888	10.2375	6.08841	-6.33246	4120.99
291.927	6.81428	10.0968	9.84046	-6.69205	4149.04
292.427	6.83974	10.2762	13.9236	-6.81355	4177.62
292.927	7.06868	10.5265	18.1727	-7.67855	4209.76
293.427	7.12168	10.4478	22.4407	-7.25656	4247.66
293.927	7.23375	10.5188	26.6289	-7.50468	4288.3
294.426	7.27097	10.4852	31.85	-6.44594	4336.28
294.926	7.21996	10.2117	37.1682	-6.10142	4386.71
295.426	7.19782	9.95121	43.443	-5.55739	4446.99
295.926	7.45419	10.0991	50.6146	-5.85587	4508.78
296.426	7.23117	10.1657	60.1584	-6.01214	4569.75
296.926	6.89414	9.8886	71.6713	-5.96202	4626.16
297.426	6.84542	10.0232	84.7891	-5.61702	4677.3
297.926	6.73853	9.58434	98.9621	-5.87581	4721.85
298.425	6.96221	9.7043	114.734	-4.60454	4759.17
298.925	7.14889	9.91033	131.86	-2.63525	4792.44
299.425	7.28525	10.0667	150.743	-0.88826	4829.77
299.925	7.23385	10.0307	171.018	2.70832	4869.7
300.425	7.2379	10.2943	191.979	5.21795	4915.7
300.925	7.29742	10.1033	211.959	8.63953	4967.18
301.425	7.52978	10.074	230.772	13.0433	5023.21
301.925	7.66625	10.0983	247.065	17.4372	5081.61
302.424	7.55254	10.3084	260.887	21.7742	5144.03
302.924	7.16999	10.3276	271.041	27.0099	5209.02
303.424	7.02413	10.5221	278.497	32.073	5280.85
303.924	6.75616	10.2618	284.072	36.8228	5359.49
304.424	6.62179	10.5438	288.214	41.1137	5440.28
304.924	6.37996	10.7551	291.798	45.8116	5514.03
305.424	6.41199	10.6267	294.068	48.7736	5588.64
305.924	5.97377	10.4033	295.124	51.8471	5659.56
306.423	5.94666	10.6061	294.758	53.955	5725.31
306.923	5.4798	10.6263	293.02	56.0089	5791.85
307.423	5.71227	10.8335	290.551	57.9601	5863.31
307.923	5.66374	10.8504	289.249	58.747	5937.56
308.423	5.81601	10.9153	289.326	58.3257	6010.9
308.923	5.90948	11.1507	292.181	58.7489	6075.37
309.423	5.79659	11.0427	299.567	58.1105	6132.29
309.923	5.96684	10.9488	312.556	58.461	6187.8
310.422	5.66624	11.1227	327.876	58.8675	6244.69
310.922	5.51412	10.9347	344.538	58.2958	6305.87
311.422	5.27971	10.7478	361.433	58.6979	6370.02
311.922	5.47632	10.5733	379.422	58.0284	6436.27
312.422	5.60902	10.5487	398.977	57.1791	6501.2
312.922	5.65651	10.4324	420.201	55.0865	6565.95
313.422	5.4771	10.3516	441.358	53.7158	6629.48
313.922	5.18989	10.1872	461.612	52.0877	6683.6
314.421	4.93035	10.1951	479.627	49.1781	6729.29
314.921	5.21776	10.1302	494.262	47.0145	6773.29
315.421	5.05386	10.2385	505.203	44.6931	6817.92
315.921	5.17137	10.1389	513.069	42.271	6863.56
316.421	4.82328	10.0695	518.207	39.8133	6908.48
316.921	4.63519	9.90361	520.443	37.38	6949.8
317.421	4.50739	9.89065	519.209	37.0302	6993.67
317.921	4.82993	9.90744	517.978	35.7682	7034.3
318.42	4.72186	9.69525	517.335	33.4892	7075.71
318.92	4.90799	9.62594	517.74	30.1678	7115.93
319.42	4.7522	9.33077	518.828	28.8794	7158.82
319.92	4.73474	9.31353	521.369	27.7222	7200.15
320.42	4.47936	9.08087	525.775	26.664	7237.43
320.92	4.48897	9.25225	530.661	24.6516	7272.32
321.42	4.15293	9.07125	534.992	23.6468	7304.76
321.92	3.85638	8.89066	539.592	21.6401	7335.91
322.419	3.8811	8.45977	544.83	19.577	7372.1
322.919	4.12269	8.41499	549.556	17.4611	7407.67
323.419	4.3238	8.15157	555.223	17.3153	7440.6
323.919	4.33659	7.9251	561.022	15.1305	7471.98
324.419	4.26904	7.75454	566.401	11.8366	7507.06
324.919	4.11713	7.78022	571.979	9.53604	7543.12
325.419	4.26118	7.88273	577.061	8.39616	7579.13
325.919	4.20374	7.92762	579.75	7.50009	7612.98
326.418	4.31092	8.02939	581.841	6.84887	7648.6
326.918	4.20627	7.93334	581.441	6.41884	7684.01
327.418	4.13391	7.76627	578.709	5.16203	7718.12
327.918	3.97357	7.67257	576.264	4.03995	7752.86
328.418	4.10549	7.92649	575.992	3.0728	7787.25
328.918	4.03053	8.28765	577.575	3.29263	7822.27
329.418	4.11241	8.61344	581.983	1.71008	7856.95
329.918	3.97302	8.75191	588.316	1.3326	7892.35
330.417	3.60462	8.80641	597.263	1.28271	7925.7
330.917	3.64606	8.7683	607.388	0.62645	7960.39
331.417	3.74062	9.01366	618.133	1.45512	7997.13
331.917	3.50257	8.91486	630.045	2.89647	8036.71
332.417	3.55093	8.83301	643.416	4.00278	8078.87
332.917	3.38996	8.89658	658.085	5.83002	8128.17
333.417	3.51223	9.10255	674.14	8.47131	8179.83
333.917	3.16207	9.05866	689.877	9.96538	8229.38
334.416	3.20488	8.36676	704.933	14.3316	8281
334.916	2.89815	8.54189	718.996	18.5719	8333.72
335.416	2.98838	8.1168	731.585	21.4644	8383.2
335.916	2.60887	8.09096	741.184	25.7829	8425.02
336.416	2.63713	7.99122	747.294	28.3068	8459.25
336.916	2.34608	7.69634	751.136	30.745	8487.85
337.416	2.24436	8.22474	753.375	29.8966	8516.77
337.916	2.22877	7.70569	753.491	29.6421	8552.69
338.415	2.5558	8.25013	750.233	29.0546	8592.44
338.915	2.5873	7.62225	742.049	28.1803	8638.5
339.415	3.04735	8.43147	728.586	28.0967	8690.03
339.915	2.4109	8.06347	712.846	26.8796	8747.52
340.415	2.66006	8.60061	694.436	24.5724	8806.68
340.915	2.3191	8.29602	673.093	24.3121	8871.36
341.415	2.24902	8.24857	648.659	24.2453	8927.67
341.915	2.4652	7.97749	622.289	23.3621	8977.93
342.414	2.33313	7.99365	595.077	23.6388	9022.65
342.914	2.08563	8.06206	572.723	23.0537	9056.41
343.414	1.98426	8.30196	554.412	22.5228	9077.13
343.914	1.79828	8.19627	538.949	22.0152	9086.62
344.414	1.29006	8.10145	524.806	20.5031	9088.8
344.914	1.73972	7.89664	511.723	18.9922	9087.63
345.414	1.92008	7.71673	499.563	18.5681	9088.78
345.914	2.04952	7.58043	488.846	17.2959	9094.3
346.413	1.85846	7.6311	479.004	17.199	9100.21
346.913	1.96205	8.00755	468.758	17.3266	9112.45
347.413	1.98497	7.44762	457.328	15.6363	9132.99
347.913	2.16113	8.07252	446.062	16.1119	9158.38
348.413	1.84787	7.7741	434.227	15.7916	9189.57
348.913	1.78325	8.14721	423.1	15.5931	9228.02
349.413	1.6059	7.94556	413.506	14.4727	9272.46
349.913	1.31872	8.14753	404.488	14.4068	9317.78
350.412	1.18557	8.12995	396.409	13.4072	9361.25
350.912	1.22388	7.87486	391.651	12.4477	9400.99
351.412	1.06006	8.13807	390.792	11.5652	9430.37
351.912	1.0644	7.67477	392.587	10.8003	9451.4
352.412	0.8629	7.60433	397.358	11.2065	9471.19
352.912	0.953192	7.83264	404.953	9.82261	9495.72
353.412	0.83804	7.48118	416.499	9.70775	9524.22
353.912	0.632768	7.7962	432.366	9.08391	9552.62
354.411	0.466855	7.41384	452.422	11.2599	9584.7
354.911	0.47377	7.82744	476.062	12.7299	9621.15
355.411	0.529343	7.29702	503.638	16.1485	9661.36
355.911	0.623603	7.68637	533.62	22.5802	9701.41
356.411	0.368404	7.51356	563.626	34.3859	9741.28
356.911	0.00945472	7.63041	592.35	50.0976	9781.12
357.411	-0.0548573	7.9189	618.182	74.2551	9823.32
357.911	-0.0515766	7.61714	638.155	106.267	9870.38
358.41	0.0205259	7.728	650.485	148.014	9919.59
358.91	0.0275577	6.90568	654.317	197.74	9970.81
359.41	0.206792	7.81568	651.679	254.981	10025.5
359.91	0.044076	7.88303	642.572	304.679	10079.8
360.41	0.0282079	8.57517	626.343	351.66	10129.3
360.91	-0.33129	8.63851	604.188	400.542	10172.5
361.41	-0.51996	9.17354	578.758	450.359	10209.5
361.91	-0.377898	9.43076	552.914	504.279	10243.6
362.409	-0.138448	9.76567	531.973	561.555	10274.9
362.909	-0.061107	10.1758	518.191	618.304	10302.6
363.409	0.0892854	9.89859	509.279	677.648	10335.3
363.909	0.177073	11.0689	503.748	737.892	10368.5
364.409	0.311535	10.696	499.316	798.348	10399.5
364.909	0.226919	11.4988	494.197	861.424	10430.2
365.409	0.286284	11.1306	487.969	930.561	10460.8
365.909	0.113582	11.9595	481.514	1001.93	10491.5
366.408	0.211058	11.6341	474.714	1074.24	10522.1
366.908	-0.0332032	12.7615	465.681	1148.05	10551.4
367.408	-0.235588	12.7191	455.584	1219.88	10581.4
367.908	-0.242424	13.4499	445.977	1289.32	10610.6
368.408	-0.161644	12.9373	438.422	1357.39	10638
368.908	0.255041	13.5288	432.815	1426.58	10660.4
369.408	0.486446	12.7353	427.267	1498.74	10682
369.908	0.493623	13.2915	421.011	1575.83	10708.3
370.407	0.256379	12.851	415.305	1657.71	10738.8
370.907	-0.0963436	13.1408	411.363	1742.98	10767.6
371.407	-0.288349	12.3003	406.905	1831.89	10793.4
371.907	-0.0366485	12.7138	401.928	1923.54	10820.1
372.407	0.169727	11.9237	397.372	2015.8	10849.1
372.907	0.186743	12.3089	395.598	2108.52	10876.2
373.407	-0.0030736	12.036	395.989	2201.69	10902.6
373.907	0.222665	12.467	399.392	2298.48	10931.6
374.406	0.108785	12.3528	405.065	2395.16	10962.7
374.906	0.132709	12.6638	412.088	2494.97	10994.3
375.406	0.0395043	12.5133	419.005	2598.24	11026.8
375.906	-0.178683	12.5013	423.88	2703.2	11061.9
376.406	-0.517295	12.3789	427.311	2812.04	11102.1
376.906	-0.835252	12.2701	429.306	2921.03	11143.9
377.406	-0.985438	11.931	428.418	3028.5	11189.4
377.906	-0.574467	12.2531	423.72	3140.21	11236.4
378.405	-0.610186	11.7461	414.962	3259.32	11282.3
378.905	-0.999375	12.0284	404.796	3381.89	11330.2
379.405	-1.36228	11.9966	394.447	3511.71	11375.9
379.905	-1.42212	12.0065	386.099	3647.35	11417.9
380.405	-1.28724	11.6774	380.704	3787.88	11451.1
380.905	-1.0911	11.8849	377.052	3928.88	11476.7
381.405	-1.10707	11.758	371.759	4071.58	11498.9
381.905	-1.35629	12.0274	363.995	4213.02	11522.5
382.404	-1.83984	11.5555	354.307	4354.11	11550.7
382.904	-1.78304	11.3255	344.367	4492.74	11586
383.404	-1.78343	11.2371	337.702	4625.86	11619.8
383.904	-1.59211	11.1743	335.28	4755.71	11648.4
384.404	-1.83806	10.8868	336.633	4883.98	11677.2
384.904	-1.77336	10.8813	341.553	5008.66	11704.7
385.404	-1.75539	10.5439	349.35	5130.91	11728.4
385.904	-1.65753	10.6274	360.474	5258.16	11749.7
386.403	-1.47586	10.5146	376.375	5385.81	11765.4
386.903	-1.33722	10.5648	397	5513.87	11782.6
387.403	-1.24678	10.5167	420.132	5635.11	11801.9
387.903	-1.2063	10.3505	443.013	5756.26	11816.5
388.403	-0.963295	10.0552	465.652	5880.24	11833.9
388.903	-0.768969	9.88299	487.394	6005.63	11852.7
389.403	-0.38515	9.46544	506.48	6125.51	11873.1
389.903	-0.452844	9.18255	521.82	6239.78	11897.1
390.402	-0.488189	9.30118	533.924	6348.61	11918.1
390.902	-0.355034	9.19208	543.467	6452.54	11938.4
391.402	-0.299818	8.57662	555.607	6553.46	11954
391.902	-0.0783625	8.32685	570.124	6653.48	11965
392.402	-0.326442	8.33825	586.176	6754.73	11971.8
392.902	-0.0523865	7.85238	601.903	6855.15	11978.1
393.402	-1.81899e-13	7.61295	616.251	6950.39	11980
393.902	-0.441643	7.26888	630.262	7044.15	11982.5
394.401	-0.497341	6.71173	643.757	7134.53	11983.1
394.901	-0.517054	6.60075	655.564	7221.98	11983.4
395.401	-0.501326	6.97723	666.587	7309.52	11986
395.901	-0.707725	6.71449	678.148	7398.69	11989.7
396.401	-0.76674	6.92236	688.794	7497.26	11997
396.901	-0.798983	7.23742	699.66	7601.78	12005.4
397.401	-0.807413	7.26428	711.676	7713.96	12015.2
397.901	-1.42419	7.36055	725.505	7829.63	12025.6
398.4	-1.51534	7.65534	741.363	7947.64	12038.8
398.9	-1.42356	7.39538	759.226	8064.13	12054.1
399.4	-1.4063	7.96298	779.677	8170.76	12070.7
399.9	-1.73669	7.75121	802.853	8266.26	12086
400.4	-1.42319	8.25035	829.839	8353.16	12105.4
400.9	-2.09939	8.60181	860.052	8435.86	12129.7
401.4	-2.03189	8.77806	890.717	8515.38	12157.6
401.9	-2.57001	9.26325	922.181	8597.06	12188.4
402.399	-2.58507	9.29016	951.42	8676.29	12221.5
402.899	-2.92207	9.33279	976.747	8752.25	12257.9
403.399	-2.94479	9.13903	997.853	8824.14	12298.3
403.899	-2.87838	9.71514	1015.25	8900.2	12338.9
404.399	-3.09713	9.55799	1027.44	8972.5	12377.5
404.899	-2.84947	9.25771	1037.48	9045.47	12411.5
405.399	-2.63104	9.19992	1048.07	9115.28	12440.4
405.899	-2.34006	8.89173	1061.34	9182.63	12465.6
406.398	-2.50062	9.33192	1075.53	9241.04	12482
406.898	-2.62649	8.75788	1088.89	9287.97	12491.7
407.398	-2.57515	8.51355	1101.54	9329.49	12497.6
407.898	-2.58366	8.24905	1114.03	9366.28	12501
408.398	-2.39776	7.47016	1128.29	9398.42	12500.9
408.898	-2.26733	7.45145	1143.5	9429.29	12505.2
409.398	-2.20687	7.10104	1156.36	9456.57	12514.2
409.898	-1.85218	7.16201	1164.95	9485.14	12524.8
410.397	-2.34968	6.87929	1169.45	9514.18	12534.5
410.897	-1.96385	6.72646	1170.07	9544.85	12546
411.397	-2.30797	6.43968	1167.96	9579.43	12558.8
411.897	-2.27689	5.99695	1163.6	9616.05	12576.7
412.397	-2.60559	5.6372	1157.3	9659.63	12601
412.897	-2.78992	4.97946	1149.55	9707.68	12625.6
413.397	-2.55301	4.64756	1141.34	9757.98	12649
413.897	-3.01568	3.89993	1133.96	9808.65	12673.7
414.396	-2.93158	3.61731	1128.68	9859.34	12695.3
414.896	-2.90511	2.82165	1122.5	9904.3	12716.4
415.396	-3.07926	2.2757	1121.85	9942.74	12738
415.896	-2.4629	1.77003	1126.47	9973.22	12759.5
416.396	-3.20573	1.58082	1138.07	9996.99	12780.9
416.896	-2.96344	1.47154	1153.65	10015	12805.5
417.396	-3.45688	1.30463	1174.53	10033	12832.3
417.896	-3.94323	1.18484	1201.57	10057.1	12859.7
418.395	-3.88021	1.09198	1232.57	10081.7	12884.6
418.895	-3.99136	0.49845	1267.95	10107.5	12904.4
419.395	-3.65571	0.39134	1309.68	10133.7	12918.6
419.895	-3.8868	-0.09718	1357.18	10167.1	12923.7
420.395	-3.96656	-0.34721	1409.42	10202.8	12922.7
420.895	-3.89949	-0.83974	1466.04	10242.2	12915
421.395	-4.20582	-1.17894	1526.28	10284.4	12905.7
421.895	-4.15058	-1.57518	1588.75	10331.2	12895.3
422.394	-4.85898	-1.48776	1653.41	10377.2	12878.7
422.894	-5.20151	-1.5072	1719.78	10420	12865
423.394	-5.2546	-1.12339	1786.01	10462.5	12855
423.894	-5.74922	-0.95797	1849.5	10502.4	12851.1
424.394	-5.29305	-0.40137	1906.87	10535.5	12851.5
424.894	-5.87407	0.03359	1956.38	10562.7	12856.2
425.394	-5.13224	0.18778	1998.13	10581.8	12865.4
425.894	-5.68661	0.41799	2034.39	10603.2	12875.3
426.393	-5.45079	0.72297	2069.92	10624.9	12886.7
426.893	-5.53072	0.97004	2104.49	10647.9	12899.3
427.393	-5.57048	1.39903	2138.16	10675.3	12913.5
427.893	-5.56978	1.4958	2172.52	10702.9	12927.7
428.393	-5.78278	1.61648	2207.71	10737.2	12940.2
428.893	-5.83645	1.63327	2242.58	10773.2	12949.1
429.393	-5.72457	1.79248	2279.35	10808.5	12954.7
429.893	-5.70623	1.96644	2321	10840.2	12959.8
430.392	-5.92506	1.89205	2367.24	10869.6	12963.4
430.892	-6.2642	1.56087	2418.86	10897.2	12966.4
431.392	-6.33798	1.74155	2474.81	10923.5	12967.2
431.892	-6.51071	1.33008	2539.89	10946.3	12969.1
432.392	-6.53458	1.58628	2610.4	10972.4	12972.7
432.892	-6.9114	1.41118	2686.95	10994.8	12978.3
433.392	-6.88977	1.42308	2772.45	11013.5	12987
433.892	-7.08051	2.00954	2865.12	11031.6	12993.6
434.391	-7.48812	1.39318	2958.89	11052.8	12997.7
434.891	-7.59765	2.04131	3050.89	11075.3	13001.1
435.391	-7.38714	1.82968	3137.37	11098.1	13004.5
435.891	-7.48823	1.57901	3221.6	11119.5	13006
436.391	-7.67086	1.41821	3302.56	11142.8	13008.5
436.891	-7.43056	0.85722	3380.79	11158.9	13011
437.391	-7.89509	0.16591	3453.53	11169.4	13013.5
437.891	-7.82055	0.77931	3522.85	11173.6	13013.8
438.39	-7.9332	0.10229	3588.56	11172.1	13014.8
438.89	-7.7347	0.11647	3648.42	11169.2	13013.4
439.39	-7.97703	0.73669	3702.81	11166.9	13012.6
439.89	-7.79539	0.56054	3752.58	11166.3	13012.3
440.39	-7.93928	0.28635	3798.76	11169.5	13010.4
440.89	-7.67665	1.04384	3842.14	11174.8	13008
441.39	-8.02175	0.56755	3884.07	11185.1	13003.1
441.89	-7.99709	-0.18509	3929.67	11198.4	13000
442.389	-8.34866	-0.03827	3979.02	11213.9	12997.2
442.889	-8.45656	-0.06687	4030.44	11235	12996.2
443.389	-8.93378	-0.27226	4083.46	11256.3	12999
443.889	-9.01939	-0.01791	4137.27	11280	13002.9
444.389	-9.31394	0.45405	4190.7	11304.1	13003.2
444.889	-9.30742	0.36142	4243.83	11319.9	13005.6
445.389	-9.35637	0.29524	4294.28	11333.1	13005.7
445.889	-9.45505	0.38082	4340.73	11337.9	13003
446.388	-9.71569	0.11213	4391.13	11338.6	12997.6
446.888	-9.36281	0.10975	4440	11338.6	12992.6
447.388	-9.25265	0.38784	4488.74	11341.6	12990.7
447.888	-8.89908	-0.19088	4539.52	11344.2	12989.5
448.388	-8.56194	-0.0048	4592.65	11346.1	12989.8
448.888	-8.39665	-0.27729	4644.91	11349.3	12993.2
449.388	-8.18322	-0.26767	4697.11	11356.5	13001.3
449.888	-8.0713	-0.34463	4749.76	11367.6	13011.4
450.387	-7.83516	-0.27037	4805.17	11383	13024.6
450.887	-8.49955	-0.43534	4862.48	11397.5	13036.4
451.387	-8.18984	-0.48329	4918.24	11414.7	13049.4
451.887	-8.87591	-0.92235	4974.32	11430.2	13062.9
452.387	-8.80136	-1.3818	5032.27	11444.9	13071.1
452.887	-8.91103	-1.58961	5091.3	11455.2	13078.2
453.387	-8.92959	-1.65246	5152.52	11463.3	13082.5
453.887	-8.80855	-2.07382	5218.28	11469.8	13086.2
454.386	-8.61723	-1.97947	5289.87	11474.6	13085.6
454.886	-7.91601	-2.61503	5362.53	11475.7	13081.8
455.386	-7.39399	-2.86186	5435.54	11477.2	13071.4
455.886	-6.12643	-2.56124	5506.65	11481.4	13057.3
456.386	-4.43269	-3.21935	5572.25	11483.6	13040.2
456.886	-2.92519	-3.6007	5631.8	11488.8	13025.3
457.386	-0.460023	-2.91192	5688.88	11489.8	13013.2
457.886	1.12327	-3.53607	5743.69	11490.5	13008.7
458.385	3.75164	-4.01942	5796.82	11489.7	13009.3
458.885	5.93572	-3.20587	5852.25	11490.7	13017.1
459.385	9.58781	-3.48971	5908.3	11489.5	13030.5
459.885	13.6981	-4.32543	5963.21	11488.4	13044.5
460.385	19.5219	-4.20987	6015.14	11487.7	13060.6
460.885	25.7533	-4.37857	6062.18	11489	13077.3
461.385	33.8966	-5.62152	6104.71	11493.9	13092.9
461.885	43.8388	-5.92844	6147.67	11499.9	13106.7
462.384	56.2888	-6.24432	6191.94	11506.4	13120.8
462.884	71.5252	-6.9465	6238.71	11516.6	13133.3
463.384	90.341	-7.27568	6283.9	11529.9	13142.7
463.884	113.235	-7.45655	6326.07	11544	13147.3
464.384	139.817	-8.24318	6369.68	11558.6	13145.1
464.884	170.65	-8.50633	6414.05	11573	13135.4
465.384	204.113	-8.71685	6460.29	11585.5	13115
465.884	239.421	-8.74936	6509.95	11596.2	13081
466.383	275.368	-9.10778	6563.8	11602.5	13042.1
466.883	313.036	-9.41721	6623.84	11604.8	13004.9
467.383	352.198	-9.77926	6689.76	11607.3	12988.1
467.883	393.976	-9.66691	6760.12	11608.2	12994.1
468.383	437.531	-9.56268	6835.31	11609.9	13014.6
468.883	481.976	-9.23005	6913.13	11614.1	13042.7
469.383	525.916	-9.19451	6991.3	11617.2	13080.4
469.883	569.037	-9.24384	7071.8	11622.6	13119.2
470.382	611.319	-9.14833	7153.63	11630.4	13148
470.882	652.315	-9.17767	7233.12	11641.3	13171
471.382	692.789	-9.35573	7311.19	11648.7	13189.8
471.882	732.593	-9.81821	7387.23	11651.8	13200.2
472.382	771.338	-10.3072	7460.76	11652.2	13202.6
472.882	809.249	-10.4178	7533.16	11650.8	13198.4
473.382	846.751	-10.502	7604.12	11648.9	13189.7
473.882	884.146	-10.6856	7675.93	11646.4	13176.3
474.381	919.527	-10.9693	7747.66	11647.9	13163.9
474.881	951.544	-11.2208	7817.76	11655.3	13158.4
475.381	980.45	-11.4291	7886.64	11666.1	13162.8
475.881	1005.74	-11.4627	7956.02	11677.1	13172.4
476.381	1026.97	-11.3223	8025.48	11686	13182.5
476.881	1043.99	-11.5247	8092.28	11694.1	13193.4
477.381	1058.41	-11.8375	8157.29	11702.3	13205
477.881	1073.68	-12.0011	8222.7	11709.2	13221.2
478.38	1090.41	-12.2513	8290.18	11714.6	13239.5
478.88	1108.39	-12.3302	8357.23	11720.4	13258.9
479.38	1128.54	-12.2301	8419.75	11726.8	13273.4
479.88	1149.1	-12.3357	8483.84	11732.8	13282.5
480.38	1168.7	-12.2876	8552.47	11736.5	13283.5
480.88	1185.65	-12.594	8620	11742	13283.9
481.38	1198.85	-12.7612	8687.95	11750.4	13287
481.88	1210.25	-13.0274	8755.92	11759.7	13288.8
482.379	1220.29	-13.0107	8825.89	11765.4	13288.2
482.879	1228.72	-13.2087	8891.29	11769.1	13284.8
483.379	1234.64	-13.1315	8950.87	11769.9	13280.8
483.879	1235.75	-13.2851	9001.88	11773.8	13276.2
484.379	1233.05	-13.5624	9045.85	11777.2	13267.5
484.879	1226.98	-13.9649	9086.48	11781.1	13261.1
485.379	1220.74	-14.1075	9124.22	11786.9	13255.9
485.879	1213.82	-14.2289	9160.5	11791.5	13254.7
486.378	1206.91	-14.4601	9194.48	11795	13255.9
486.878	1200.07	-14.6797	9226.73	11801.5	13259.9
487.378	1193.23	-14.8813	9255	11809.9	13265.1
487.878	1186.26	-15.1804	9281.55	11814.9	13270.2
488.378	1178.47	-15.4366	9304.36	11816.4	13273.1
488.878	1170.02	-15.6274	9324.92	11822.1	13270.1
489.378	1162.48	-15.6095	9344.9	11826.2	13264.5
489.878	1154.05	-15.5013	9365.61	11829.6	13257.1
490.377	1145.88	-15.1882	9385.53	11832.2	13250.2
490.877	1138.19	-15.1927	9402.96	11837.2	13240.9
491.377	1130.51	-15.2908	9417.75	11837.7	13235.8
491.877	1122.51	-15.6098	9432.63	11841.1	13232.1
492.377	1114.99	-15.6377	9451.05	11846.1	13224.1
492.877	1107.55	-15.4804	9470.8	11856.3	13215.8
493.377	1099.79	-15.3948	9491.1	11864	13214.5
493.877	1093.72	-15.4021	9510.37	11874.6	13212
494.376	1087.64	-15.3958	9532.92	11890.2	13206.8
494.876	1082.3	-15.6435	9558.68	11907.7	13201.4
495.376	1078.75	-15.7822	9583.96	11925.6	13192.5
495.876	1074.87	-15.934	9611.19	11941	13179.9
496.376	1071.19	-16.35	9637.25	11950.3	13166.8
496.876	1070.35	-16.7707	9661.49	11957	13156.8
497.376	1071.99	-16.7896	9683.25	11963.1	13148.5
497.876	1075.2	-17.1357	9701.58	11975.8	13144.1
498.375	1084	-17.1791	9718.36	11987.2	13138.8
498.875	1096.31	-17.1551	9735.48	11995.6	13132.2
499.375	1109.69	-17.1977	9750.81	12001.6	13126.3
499.875	1127.08	-17.1957	9762.86	12003.8	13119.7
500.375	1146.4	-17.4124	9774.71	12005.2	13110.5
500.875	1167.12	-17.3555	9789.09	12003.7	13102.4
501.375	1190.94	-17.6503	9806.17	12005.7	13094.8
501.875	1216.2	-17.8004	9825.18	12007.2	13087.6
502.374	1240.5	-18.0394	9850.68	12007.1	13082
502.874	1265.72	-17.9792	9879.14	12006.4	13075
503.374	1291.44	-18.1097	9907.8	12003.6	13066.9
503.874	1318.08	-18.0597	9936.28	12000.5	13060
504.374	1344.84	-18.078	9966.98	11995.7	13057
504.874	1371.85	-17.922	9997.29	11986.9	13055.5
505.374	1402.45	-18.227	10028.3	11977.8	13056.8
505.874	1437.68	-18.1248	10057.7	11967.3	13060.2
506.373	1475.2	-18.2296	10084.7	11952.3	13066.8
506.873	1515.56	-18.3001	10108.7	11938	13073.5
507.373	1559.54	-18.3346	10130.7	11923.7	13080.8
507.873	1606.76	-18.3367	10151.5	11910.7	13087.5
508.373	1658.23	-18.441	10170.1	11898.5	13092.3
508.873	1713.26	-18.4085	10185	11886.2	13096.1
509.373	1768.34	-18.7512	10196.5	11871.2	13101.9
509.873	1820.59	-18.981	10205.4	11860	13110
510.372	1870.79	-19.089	10211.8	11850.3	13117.1
510.872	1919.42	-19.3243	10215.9	11846.5	13125.1
511.372	1964.7	-19.6877	10218.9	11842.8	13132.8
511.872	2004.56	-20.0413	10220.2	11839.8	13138.1
512.372	2040.58	-20.3623	10222.2	11837.4	13140.9
512.872	2073.39	-20.3774	10223.5	11834.1	13144.3
513.372	2102.59	-20.3227	10225.1	11827.6	13150.8
513.872	2130.07	-20.4573	10226.4	11821.8	13159.6
514.371	2160.06	-20.541	10228	11817.8	13169.6
514.871	2192.54	-20.7006	10228.4	11812.7	13177.6
515.371	2226.29	-20.5634	10227.3	11809.6	13183.3
515.871	2257.66	-20.7616	10223.8	11806.3	13188.7
516.371	2287.03	-20.6845	10218.7	11800.9	13193.9
516.871	2315.73	-20.9578	10210.7	11798.3	13199.3
517.371	2344.81	-21.0859	10201	11795.5	13207.4
517.871	2375.25	-21.3042	10193.8	11791.2	13218.5
518.37	2405.89	-21.2259	10190.2	11785.3	13231.9
518.87	2434.04	-21.4675	10190	11778	13244.5
519.37	2460.06	-21.2788	10192.5	11774.5	13256.1
519.87	2485.09	-21.2767	10198.2	11771.1	13267.6
520.37	2509.21	-21.3498	10203.4	11766.9	13279.9
520.87	2534.7	-21.3719	10209.2	11765	13295.6
521.37	2562.07	-21.3372	10214.5	11762.6	13308.4
521.87	2592.28	-21.3685	10217.6	11762.7	13318.5
522.369	2626.59	-21.2132	10218.6	11762.4	13325.4
522.869	2667.5	-21.2447	10220	11761.5	13327.8
523.369	2712.99	-21.091	10221.1	11759.2	13331.6
523.869	2757.9	-20.9971	10223.6	11760.6	13337.1
524.369	2799.65	-20.9674	10228.1	11760.1	13342
524.869	2839.68	-20.8769	10232.5	11763.9	13344.2
525.369	2877.74	-20.8509	10235.8	11769.3	13343.6
525.869	2912.23	-20.6455	10241	11774.4	13340.1
526.368	2945.78	-20.3951	10246.5	11782.3	13338.3
526.868	2978.54	-20.2472	10250.3	11788	13338.5
527.368	3009.07	-20.6006	10253.8	11794.5	13340
527.868	3040.33	-20.7057	10257.8	11804.9	13343
528.368	3071.75	-20.9108	10262.4	11816.4	13344.1
528.868	3103.82	-20.8226	10269.5	11826.5	13346.2
529.368	3135.63	-20.9262	10279.9	11838	13344.8
529.868	3170.51	-20.5937	10292.4	11845.4	13339.7
530.367	3209.74	-20.8275	10307.8	11854.4	13335.9
530.867	3251.55	-20.6429	10322.4	11859.5	13335.7
531.367	3295.04	-20.6599	10335.5	11867.6	13332.9
531.867	3340.46	-20.5184	10347	11870	13328.5
532.367	3389.67	-20.8538	10359	11873.5	13324.5
532.867	3441.16	-20.6715	10370.9	11873.6	13319.2
533.367	3491.64	-20.9628	10379.5	11871.1	13315.7
533.867	3542.12	-20.8609	10389.2	11864	13312.4
534.366	3592.8	-20.9788	10400.1	11859.5	13311.4
534.866	3643.47	-21.1965	10413.3	11855	13309.7
535.366	3692.89	-21.2501	10427.1	11851	13310.2
535.866	3742.18	-21.3721	10439.5	11848.7	13307.9
536.366	3790.33	-21.3013	10451.1	11843.6	13305.6
536.866	3834.25	-21.1501	10463.8	11841.9	13301.4
537.366	3871.85	-20.9168	10477.8	11842.3	13300.2
537.866	3901.73	-21.1082	10490.2	11843.2	13301.3
538.365	3920.8	-21.1007	10503.9	11845.8	13301.3
538.865	3931.5	-20.7515	10520.1	11850.6	13297
539.365	3938.27	-20.3161	10538.4	11859.7	13294
539.865	3943.23	-20.2023	10561.1	11867.1	13290.4
540.365	3950.25	-20.0646	10587.2	11877.1	13286.1
540.865	3960.49	-20.2879	10616.1	11886.1	13280.9
541.365	3972.38	-20.3702	10648	11895.1	13275.9
541.865	3985.48	-20.4142	10681.2	11897	13269.2
542.364	4002.83	-20.1551	10711.5	11893.8	13264.3
542.864	4025.12	-20.2169	10737.9	11887	13258.6
543.364	4053.18	-20.1122	10757.7	11878.8	13255.8
543.864	4086.4	-19.9657	10773.4	11868.8	13255.6
544.364	4125.32	-19.9149	10786.9	11861	13257.5
544.864	4169.67	-20.2257	10803.9	11856.4	13264.8
545.364	4218.05	-20.1479	10825.4	11854.1	13273.4
545.864	4268.58	-20.4225	10849.5	11857.7	13283.8
546.363	4320.01	-20.3055	10874.2	11864.3	13291.4
546.863	4367.67	-20.2931	10902.8	11870.5	13294.4
547.363	4411.21	-20.53	10930.2	11876.4	13294.7
547.863	4451.92	-21.0256	10953.7	11879.1	13297.5
548.363	4489.96	-20.8885	10977.9	11875.7	13301.3
548.863	4524.57	-21.228	11005.6	11869	13307.8
549.363	4555.81	-21.3016	11034.4	11862.3	13318.6
549.863	4584.77	-21.972	11058.9	11857.5	13328.9
550.362	4611.77	-21.0915	11076.1	11855.5	13340.8
550.862	4637.11	-22.5268	11083.1	11859.3	13355.5
551.362	4662.3	-21.2904	11080.4	11865.4	13370.6
551.862	4688.49	-22.2076	11070.5	11873.9	13385.6
552.362	4715.95	-21.8308	11053.3	11884.5	13397.6
552.862	4743.83	-21.6156	11034.9	11892.5	13408.8
553.362	4772.22	-21.97	11015.7	11899.2	13418.5
553.862	4800.09	-21.2716	10997.1	11902.8	13420.9
554.361	4827.61	-22.2731	10978.4	11902.5	13419.4
554.861	4854.7	-21.2361	10961.8	11902.9	13416
555.361	4881.54	-21.8776	10945.3	11901.1	13414.1
555.861	4907.19	-21.6158	10931.8	11896.9	13413.1
556.361	4932.44	-21.5405	10921.7	11892.7	13410.1
556.861	4960.01	-21.6665	10912.9	11886.4	13406.5
557.361	4987.67	-21.1119	10901.7	11884.1	13403.8
557.861	5013.17	-22.0069	10893	11886	13402.5
558.36	5034.15	-20.8488	10887.8	11894.2	13401.9
558.86	5056.52	-21.7331	10883.8	11908.4	13402.5
559.36	5080	-20.9446	10882.5	11926.6	13407.4
559.86	5106.39	-21.1927	10884.3	11943	13412.4
560.36	5137.21	-20.7595	10886.5	11956.9	13417.2
560.86	5170.98	-20.7618	10885.3	11970	13419
561.36	5206.98	-20.8514	10878.7	11978.6	13419.3
561.86	5246.34	-20.4027	10868.2	11987.6	13416.6
562.359	5289.26	-20.4285	10856.4	11993.2	13411.4
562.859	5334.05	-20.5898	10844.1	11991.9	13406.8
563.359	5379.91	-20.5137	10830.1	11989	13400.5
563.859	5424.89	-21.4538	10815.4	11983	13394.3
564.359	5467.27	-20.2616	10800.1	11975.1	13385.1
564.859	5506.86	-22.0433	10781.4	11970.2	13373.6
565.359	5542.43	-20.8168	10761.9	11965.1	13361.9
565.859	5573.79	-22.1341	10741.2	11965.7	13347
566.358	5600.59	-21.0284	10721.8	11966.5	13334.3
566.858	5625.81	-21.701	10703.1	11970.7	13321.2
567.358	5651.07	-21.074	10686.1	11973.6	13309.4
567.858	5678.5	-21.2478	10670.5	11978.9	13295.3
568.358	5706.73	-21.6329	10654.2	11983.7	13286.4
568.858	5735.23	-21.2089	10639.1	11987.7	13283.3
569.358	5765.43	-21.3439	10628	11991.8	13281.9
569.858	5796.55	-21.0692	10617.3	11998.7	13278.5
570.357	5829.35	-20.8962	10608.5	12004.9	13271.7
570.857	5863.39	-21.3628	10599.7	12007.6	13260.9
571.357	5899.08	-21.3553	10589.8	12009.1	13249.4
571.857	5933.71	-21.7302	10577.2	12003.9	13241.7
572.357	5969.94	-22.1085	10562.3	11997.5	13238.6
572.857	6007.52	-22.3347	10545.9	11989.1	13235.4
573.357	6049.63	-22.0028	10532.4	11981	13234.5
573.857	6094.05	-22.6119	10519.4	11972.7	13235
574.356	6141.2	-22.2959	10508.2	11966.8	13235.9
574.856	6192.09	-22.159	10498.5	11960.7	13239.9
575.356	6243.18	-22.4871	10488.8	11956.7	13242.6
575.856	6294.09	-22.2928	10475.8	11952.8	13245.4
576.356	6347.39	-22.7017	10461.2	11951.9	13242.8
576.856	6396.86	-22.7278	10447.6	11947.7	13238.4
577.356	6442.75	-22.7305	10432.7	11941.5	13234.1
577.856	6488.43	-23.3451	10417.6	11935.2	13230.1
578.355	6527.79	-22.8097	10403.5	11926.5	13226.5
578.855	6556.49	-23.7373	10389.6	11916.8	13224.5
579.355	6582.21	-23.3946	10376.6	11906.4	13221
579.855	6610.34	-23.6218	10365.1	11898.2	13218
580.355	6641.63	-23.5721	10355.5	11894.1	13211.6
580.855	6675.12	-23.4949	10350.4	11895.8	13205
581.355	6710.04	-24.0332	10350.9	11899.7	13201.7
581.855	6751.2	-24.4387	10357.2	11906.7	13201.2
582.354	6803.52	-24.2998	10365.3	11909.5	13203.6
582.854	6866.14	-24.4775	10374.3	11913.6	13204.7
583.354	6938.51	-24.3567	10385.2	11917	13204.1
583.854	7016.61	-24.3088	10400.5	11923.6	13203.5
584.354	7101.92	-24.8473	10415.7	11927.5	13200.8
584.854	7193.11	-24.4583	10428.2	11932.7	13198.5
585.354	7281.1	-24.993	10442.2	11939.6	13196.5
585.854	7360.39	-24.5807	10457.7	11947.5	13192.5
586.353	7431.82	-24.4458	10474.5	11957.7	13186.2
586.853	7494.53	-24.3648	10492.8	11969.3	13180.5
587.353	7545.56	-24.0959	10513.7	11982.9	13172.5
587.853	7588.58	-24.2759	10543.5	11997.2	13162.2
588.353	7617.36	-24.0392	10573.8	12009.1	13152.3
588.853	7638.35	-24.2562	10603.1	12015.6	13145.4
589.353	7657.03	-23.9348	10630.8	12018.8	13145
589.853	7681.18	-24.0736	10653.2	12018	13143.7
590.352	7701.82	-23.9427	10673.3	12014.8	13141.3
590.852	7717.06	-23.9164	10693.9	12010	13142.3
591.352	7727.98	-24.006	10712.9	12000.7	13139.8
591.852	7736.93	-24.3368	10731.1	11990.2	13143.1
592.352	7745.73	-24.645	10746.6	11983.9	13151.7
592.852	7759.71	-24.3988	10759.1	11975.3	13159.4
593.352	7773.94	-24.2067	10765.6	11967.8	13166.1
593.852	7785.15	-24.5886	10772.2	11958.6	13175.5
594.351	7792.91	-24.0409	10776.8	11952.1	13182.5
594.851	7800.74	-24.426	10778.9	11946.6	13187.9
595.351	7811.73	-24.2604	10777.8	11941.1	13197
595.851	7822.35	-24.6465	10778.1	11936.5	13206.7
596.351	7835.37	-23.8255	10773.9	11934.4	13218.9
596.851	7853.49	-23.7884	10769.3	11927.5	13229.3
597.351	7878.41	-23.8284	10764.3	11917.1	13238.3
597.851	7906.98	-23.3063	10758.8	11906.9	13243.5
598.35	7937.01	-24.2211	10759.7	11896.9	13247.4
598.85	7965.19	-23.3086	10766.2	11885	13252.1
599.35	7988.71	-23.2683	10774.3	11871.3	13256.3
599.85	8007.79	-22.764	10780.9	11857.1	13257.8
600.35	8024.03	-22.4233	10785.6	11843.7	13257.4
600.85	8038.94	-22.276	10785.5	11833.7	13256.1
601.35	8052.06	-22.0888	10789.3	11825.4	13255.9
601.85	8066.27	-22.1207	10799.1	11816.7	13252.8
602.349	8083.91	-22.0049	10808	11807.6	13248.8
602.849	8100.36	-21.742	10813.8	11799	13246
603.349	8116.07	-21.5984	10818.8	11788.7	13242.7
603.849	8127.96	-22.2291	10822.9	11779.8	13238.1
604.349	8134.5	-22.0096	10823.5	11772.2	13234.4
604.849	8135.16	-22.0401	10822.2	11761.3	13231.8
605.349	8132.94	-22.4661	10820	11752	13231.4
605.849	8132.62	-23.034	10823.9	11744.8	13231
606.348	8136.26	-22.9578	10825.1	11741.2	13230.2
606.848	8147.53	-22.9581	10825.4	11737.6	13225.7
607.348	8173.01	-23.1675	10826	11735.2	13219.2
607.848	8206.24	-23.5846	10827.4	11732.5	13212
608.348	8243.86	-23.3096	10828.2	11736.1	13204.4
608.848	8289.6	-23.0684	10827.7	11741.7	13201.9
609.348	8340.22	-23.7571	10831.3	11751.7	13200
609.848	8393.46	-23.3662	10833.8	11762.3	13201
610.347	8449.12	-22.8557	10838.3	11775.8	13199.8
610.847	8504.9	-22.8829	10848	11793.2	13200.3
611.347	8556.18	-22.9793	10862.6	11812.1	13202.3
611.847	8599.8	-22.391	10884.8	11831.2	13201.8
612.347	8641.02	-22.6352	10910.4	11850.6	13200.3
612.847	8678.16	-22.5013	10940.5	11864.6	13199.8
613.347	8709.45	-22.3641	10973.6	11878.6	13199.3
613.847	8733.43	-22.7489	11002	11889.3	13197.5
614.346	8753.89	-22.9161	11025.7	11900.3	13195.5
614.846	8773.3	-23.0989	11041.2	11911.4	13194.2
615.346	8788.83	-23.6717	11048.5	11920.1	13191.7
615.846	8797.76	-23.6232	11049.6	11927	13188.9
616.346	8799.9	-24.0661	11046.7	11931.4	13186
616.846	8795.07	-23.7617	11045.5	11931.1	13184.2
617.346	8786.99	-24.4641	11048.9	11926.7	13182.5
617.846	8774.76	-24.6905	11048.7	11921.3	13182.1
618.345	8758.5	-25.5314	11044.3	11917.3	13182
618.845	8742.51	-25.3288	11034.5	11912.9	13179.9
619.345	8729.51	-25.9149	11031.9	11907.4	13177.8
619.845	8717.19	-25.4097	11037.4	11900.8	13178.7
620.345	8706.89	-25.6691	11044.6	11896.1	13176.4
620.845	8696.1	-25.3465	11053.5	11890.2	13173.8
621.345	8685.9	-25.6962	11065	11883	13170.9
621.845	8676.02	-24.8597	11078.7	11874.3	13166.8
622.344	8662.5	-25.4729	11089.7	11863.2	13164
622.844	8649.74	-25.3238	11099.7	11849	13163.6
623.344	8636.11	-25.5024	11111.2	11840.2	13163.8
623.844	8619.58	-25.6308	11118.1	11835.4	13166.8
624.344	8602.7	-25.3067	11126.4	11831.7	13167.2
624.844	8584.7	-25.3935	11130.4	11826.8	13166
625.344	8562.7	-25.1467	11136.1	11820.4	13165.9
625.844	8539.41	-24.807	11139	11811.4	13167.1
626.343	8515.95	-24.7673	11141.1	11801.8	13168.5
626.843	8493.44	-24.5446	11144.7	11795.7	13166.2
627.343	8468.47	-24.14	11146.6	11790.5	13165.5
627.843	8444.33	-24.4472	11150	11783.2	13166.7
628.343	8420.92	-24.3488	11155.3	11778.8	13170.5
628.843	8401.76	-24.0661	11157.5	11774.4	13177.9
629.343	8386.61	-24.2259	11162.3	11769.9	13184.9
629.843	8376.62	-24.0799	11168.6	11766.1	13190
630.342	8374.18	-23.3564	11172.6	11758.9	13196.8
630.842	8377.45	-23.696	11176.7	11753.3	13202.6
631.342	8383.18	-23.7456	11180.9	11748.6	13204.7
631.842	8389.65	-23.34	11186	11743.1	13201.4
632.342	8398.97	-23.0887	11194.7	11740.2	13196.6
632.842	8412.65	-22.9968	11200.6	11737.5	13191.4
633.342	8427.06	-22.4236	11202.9	11738.6	13188.1
633.842	8441.35	-22.4808	11203.8	11743.1	13184.4
634.341	8453.98	-22.2941	11202.1	11751.2	13178.8
634.841	8462.45	-21.332	11199	11761	13177.1
635.341	8469.99	-20.4762	11192.2	11769.2	13180.2
635.841	8473.52	-20.2849	11184	11780.5	13184.8
636.341	8475.69	-19.9191	11176	11788.5	13192.3
636.841	8480.66	-19.7529	11171	11799.1	13203.8
637.341	8486.95	-19.4114	11169.7	11809.2	13217
637.841	8493.64	-19.0078	11168.9	11817.7	13230.3
638.34	8502.81	-18.79	11172.9	11824.9	13240.6
638.84	8514.19	-18.6308	11177.9	11837.3	13247.2
639.34	8529.74	-18.393	11184.4	11849.5	13250.3
639.84	8546.31	-17.8161	11193.9	11865.9	13250.5
640.34	8561.63	-17.283	11201	11884.4	13251.5
640.84	8578.73	-16.9496	11209	11906.6	13253.2
641.34	8596.51	-16.9656	11215.1	11924.3	13253.3
641.84	8613.95	-16.8313	11226.9	11939	13248.2
642.339	8633.46	-16.7771	11237.7	11949	13239.8
642.839	8659.04	-16.6655	11252.7	11948.6	13227.6
643.339	8690.28	-16.3575	11270.2	11940.8	13217.4
643.839	8727.69	-15.8503	11285.9	11928.8	13212.4
644.339	8769.2	-15.6631	11300	11913.8	13210.8
644.839	8809.17	-15.5719	11311.5	11896	13213.4
645.339	8843	-15.7071	11315.3	11877.1	13220.5
645.839	8871.29	-15.5607	11313.8	11857.9	13228.4
646.338	8891.97	-15.3655	11310.4	11838.6	13236
646.838	8907.7	-15.2459	11303.8	11822.6	13244.2
647.338	8916.51	-15.3263	11291.4	11810.4	13254.5
647.838	8917.33	-15.0928	11274.5	11805.6	13268.2
648.338	8911.76	-15.0264	11251.8	11805.4	13283
648.838	8901.78	-14.7461	11225.1	11809.9	13302
649.338	8889.14	-14.4912	11196.5	11820.8	13325.1
649.838	8876.57	-14.1384	11172.2	11838.5	13357.8
650.337	8866.98	-13.9416	11149.5	11858.7	13397.8
650.837	8859.32	-13.5303	11131.4	11880.6	13442.5
651.337	8844.89	-13.1536	11115.4	11903.1	13493.9
651.837	8829.33	-12.9486	11102.4	11920.8	13557.4
652.337	8817.23	-12.7979	11097.6	11935.4	13636
652.837	8815.34	-12.4507	11092	11947.9	13730
653.337	8819.13	-12.038	11091.1	11955.1	13838.8
653.837	8829.41	-11.584	11085.6	11957.9	13963.7
654.336	8842.83	-11.6234	11081.4	11963.4	14103.5
654.836	8859.36	-11.554	11074.3	11974.3	14252.3
655.336	8877.7	-11.7442	11064	11989.1	14405.4
655.836	8893.84	-11.9336	11053.3	12012.9	14557.4
656.336	8907.67	-11.9686	11043.5	12041.5	14721.4
656.836	8919.81	-11.9507	11036.4	12078.9	14890.9
657.336	8925.92	-11.6181	11031.4	12125.4	15068.4
657.836	8925.65	-11.4733	11032.4	12184.2	15257.3
658.335	8920.51	-11.6601	11031.7	12252.9	15446.8
658.835	8912.76	-11.5481	11031.6	12336.9	15644.8
659.335	8905.82	-11.3607	11027.5	12436.7	15845
659.835	8895.21	-11.3314	11024.8	12553.3	16052
660.335	8887.03	-11.4359	11020.4	12683.2	16258.2
660.835	8879.98	-10.8752	11017.2	12825	16464
661.335	8882.64	-10.2277	11013.9	12978.9	16671.1
661.835	8909.26	-9.48623	11009.6	13142.3	16877.4
662.334	8952.79	-8.77693	11011.6	13308.9	17088.5
662.834	9002.8	-7.85539	11012.2	13479.1	17302.9
663.334	9060.01	-6.72748	11010.6	13647.2	17518.5
663.834	9120.32	-5.78687	11007.5	13813.6	17742.7
664.334	9183.74	-5.05006	11002.7	13976.9	17966.8
664.834	9250.02	-4.12315	10992.8	14139.2	18196.3
665.334	9322.34	-3.20311	10980.5	14303.8	18428
665.834	9393.82	-1.83167	10962.3	14466	18656.7
666.333	9459.61	3.63798e-13	10938.6	14625	18875.4
666.833	9515.37	1.84725	10909.1	14780.1	19084.8
667.333	9562.13	4.86203	10882.4	14932.4	19280.1
667.833	9599.33	8.82632	10855.4	15082.2	19457.1
668.333	9630	14.6239	10828.3	15230.8	19620.1
668.833	9658.26	22.3746	10799.9	15385	19786.7
669.333	9682.09	33.2583	10775.8	15548	19946.9
669.833	9701.07	47.7086	10753.3	15717.7	20109.6
670.332	9715.47	65.921	10734.1	15897.5	20278.2
670.832	9724.86	87.7803	10718.5	16085.9	20454.8
671.332	9734	113.068	10706.9	16276.2	20634.9
671.832	9741.34	140.073	10700.6	16469.7	20819.7
672.332	9744.41	167.758	10696.2	16655.9	21008.6
672.832	9741.6	195.627	10689.7	16834.9	21199.2
673.332	9734.74	223.542	10680.4	17003.2	21388.2
673.832	9726.71	251.608	10670.1	17156.7	21583.5
674.331	9720.94	279.399	10657.3	17306.7	21786.7
674.831	9715.85	306.823	10643.8	17453.5	21984.6
675.331	9712.41	332.51	10626.4	17598.1	22179.1
675.831	9711.17	356.246	10616	17739.2	22364.7
676.331	9710.4	377.839	10605.6	17885.1	22542.8
676.831	9708.38	397.673	10602.9	18043.7	22718.4
677.331	9706.07	416.476	10598.5	18209.6	22887
677.831	9704.24	435.666	10597.9	18385.8	23053.6
678.33	9699.38	455.112	10601.3	18569.8	23218.6
678.83	9690.1	476.018	10605.1	18762.7	23377.8
679.33	9675.07	498.096	10606.8	18960	23526.7
679.83	9656.21	521.354	10606.5	19161.1	23665.8
680.33	9633.84	543.708	10602.7	19368.7	23796.2
680.83	9605.88	565.31	10600.2	19585.6	23916.2
681.33	9575.28	584.693	10602.6	19804	24036.7
681.83	9544.29	602.832	10605.4	20022.2	24151.1
682.329	9516.94	619.355	10606.4	20232.8	24262.5
682.829	9493.39	635.625	10602.4	20438	24368.6
683.329	9476.66	652.099	10594.7	20645.5	24474.7
683.829	9464.05	669.495	10588	20852.1	24578.6
684.329	9449.46	685.992	10583.6	21062.4	24688.4
684.829	9433.51	701.372	10581.3	21277	24809.6
685.329	9415.31	716.016	10582.1	21498.1	24939.5
685.829	9397.19	731.534	10586.6	21719.8	25077.4
686.328	9382.74	748.541	10592.7	21936.2	25222.3
686.828	9374.11	766.891	10606.8	22145.6	25369.3
687.328	9366.2	785.464	10623	22342.7	25521.8
687.828	9360.43	803.438	10640.3	22529.6	25678.2
688.328	9358.85	819.864	10654	22704.4	25834.7
688.828	9361.32	834.381	10667.6	22861	25986.4
689.328	9366.74	846.797	10675.6	23003	26128.9
689.828	9372.14	857.392	10677.7	23130.7	26264.3
690.327	9376.28	866.699	10674.4	23256.4	26395
690.827	9377.95	873.981	10667.6	23393	26520.2
691.327	9379.08	880.363	10663	23526.3	26636.3
691.827	9378.4	885.84	10665.3	23662.8	26750.2
692.327	9379.9	890.95	10668.1	23797.8	26861
692.827	9382.44	896.233	10672.4	23924	26973.2
693.327	9381.6	902.032	10677.4	24048.6	27084
693.827	9377.13	907.162	10685.1	24171.3	27207.3
694.326	9370.13	912.284	10696.6	24297.3	27342.3
694.826	9361.45	915.318	10707.7	24425.1	27485.1
695.326	9353.69	916.856	10721	24559.2	27637.4
695.826	9348.83	916.563	10734.3	24704.1	27809.9
696.326	9347.98	914.447	10745.8	24850.8	27997.6
696.826	9353.6	909.675	10751.8	25003.8	28196.2
697.326	9365.07	903.868	10757.2	25160.2	28406.5
697.826	9382.21	897.737	10759.7	25317.5	28617.3
698.325	9400.48	893.187	10760.7	25477.4	28826.9
698.825	9415.42	890.439	10763.4	25636.1	29039.6
699.325	9426.52	888.746	10765.1	25794.6	29252.1
699.825	9430.69	886.757	10770.3	25950.9	29462.7
700.325	9427.31	882.973	10778.7	26105.9	29666.2
700.825	9420.05	877.768	10792.1	26255.1	29869.4
701.325	9409.69	872.26	10805.9	26401.1	30071.6
701.825	9401.79	866.537	10827.4	26540.3	30268
702.324	9395.26	860.246	10849.5	26672.1	30460.1
702.824	9391.77	853.616	10876.1	26795.1	30651.5
703.324	9392.36	846.871	10898.5	26909.1	30839
703.824	9401.72	840.852	10914.7	27016.5	31013
704.324	9420.03	836.225	10932	27117.8	31168.8
704.824	9440.86	833.407	10941.7	27215.1	31305.2
705.324	9467.44	831.979	10949.4	27307.3	31432.3
705.824	9497.24	832.908	10950.2	27398.3	31556.4
706.323	9531.24	835.025	10951.8	27484	31678.7
706.823	9568.47	837.359	10956.2	27564.1	31796.4
707.323	9603.86	839.99	10958.4	27640.2	31905.4
707.823	9637.28	842.623	10965.5	27714.1	32003.6
708.323	9667.11	845.113	10971.2	27782.3	32100.1
708.823	9696.93	847.518	10981.3	27845.1	32196.6
709.323	9724.73	849.741	10998.4	27907	32295.4
709.823	9748.65	852.172	11023.6	27961.4	32384.6
710.322	9771.87	855.56	11055.2	28008.7	32471.5
710.822	9792.36	861.098	11086.8	28052.4	32554.7
711.322	9812.18	867.957	11121.1	28090.9	32640.5
711.822	9834.77	875.728	11153.9	28127.4	32729.2
712.322	9857.49	884.209	11183.8	28164.8	32824.8
712.822	9881.68	894.543	11212.9	28204.5	32926.9
713.322	9902.35	906.415	11240.7	28241.8	33029.3
713.822	9921.56	918.823	11274.3	28280.7	33126.2
714.321	9941.42	931.335	11316.5	28331.7	33220.7
714.821	9959.29	944.269	11367.4	28391.2	33313.3
715.321	9981.97	955.462	11427.3	28463.5	33402.6
715.821	10008.9	964.58	11495.7	28545.9	33495.3
716.321	10039.6	970.788	11583.6	28637.3	33586
716.821	10075.1	974.819	11685.4	28732.8	33672.8
717.321	10112.9	978.016	11795.1	28833.1	33757.7
717.821	10151.1	980.988	11917.7	28936	33836.7
718.32	10188.1	984.108	12057.2	29041.9	33912.5
718.82	10219.6	987.428	12208.4	29149.7	33975.3
719.32	10242.7	990.388	12381.7	29261.7	34032
719.82	10255.5	992.194	12575.9	29375.5	34090.2
720.32	10262.3	992.009	12786.4	29490	34146.6
720.82	10267.5	990.543	13020.6	29602.1	34197.2
721.32	10270.5	988.361	13273.6	29710.6	34235
721.82	10270.1	985.455	13539.4	29814.4	34264.4
722.319	10267.1	982.216	13815	29914.5	34291.2
722.819	10261.2	978.292	14094.1	30012.5	34315.1
723.319	10254.6	973.816	14375.4	30105.9	34341.5
723.819	10243.5	969.42	14660.8	30198.7	34366.8
724.319	10231.7	965.091	14952.7	30287.6	34386.2
724.819	10217.5	958.994	15243.7	30375.6	34404.1
725.319	10204.4	952.151	15530.6	30462.4	34422.5
725.819	10188	945.277	15814.8	30548.5	34439.5
726.318	10171	938.346	16089.8	30630.2	34465.7
726.818	10153.5	930.933	16361.4	30705.3	34495.6
727.318	10134	922.76	16630.6	30775.1	34530.3
727.818	10116.7	913.25	16892.1	30837.9	34571.6
728.318	10101.2	902.571	17137	30897.7	34616.6
728.818	10090	893.43	17366.8	30955.5	34664.9
729.318	10084.8	887.628	17582.9	31011.8	34713.7
729.818	10079.7	882.588	17789.1	31067.9	34758.7
730.317	10072.8	877.056	17985.7	31121.3	34800.5
730.817	10066.3	872.052	18161.5	31176.2	34840.3
731.317	10056.4	868.047	18311.9	31230	34873.2
731.817	10040.8	865.254	18439	31285.7	34904.9
732.317	10021.3	865.709	18545.2	31338.3	34932.5
732.817	9991.85	866.434	18642.6	31389.6	34964.2
733.317	9957.85	866.996	18742.2	31441.3	34999
733.817	9923.77	867.454	18852.7	31492.1	35030.4
734.316	9896.33	867.884	18975.1	31540	35055.6
734.816	9880.58	867.758	19107.2	31583.5	35076.4
735.316	9864.98	867.586	19246.1	31626.7	35094.3
735.816	9857.9	868.097	19388.9	31672.8	35108.7
736.316	9856.22	868.719	19531	31720.1	35116.2
736.816	9857.95	868.583	19670	31763.3	35119.7
737.316	9861.73	867.336	19802.8	31803.6	35125.7
737.816	9858.82	867.815	19931.3	31848.3	35130.8
738.315	9850.42	872.081	20053.6	31890.9	35133.3
738.815	9840.87	880	20168.1	31934.8	35136.8
739.315	9825.39	889.438	20274.9	31982.7	35142.8
739.815	9809.45	898.425	20376.2	32032.9	35149.6
740.315	9790.86	906.486	20476	32085.9	35157.2
740.815	9774.29	912.698	20576.7	32139.1	35163.5
741.315	9754.39	916.803	20681.4	32193	35169.3
741.815	9733.74	921.196	20796	32248.7	35171.3
742.314	9712.46	925.77	20919.1	32308.8	35173.6
742.814	9696.63	931.638	21051.4	32379.7	35180.1
743.314	9679.72	939.836	21195.9	32460	35184.8
743.814	9661.99	949.685	21345.1	32550.2	35188.6
744.314	9638.9	959.822	21497.6	32643	35188.4
744.814	9610.47	971.379	21656.3	32736.6	35186.3
745.314	9585.69	984.15	21822.4	32828.5	35189.9
745.814	9569.77	996.396	21996.3	32915.2	35196.6
746.313	9559.03	1007.3	22177	33004.2	35203.8
746.813	9555.29	1018.27	22359.5	33089	35209.3
747.313	9558.75	1028.62	22548.7	33166.1	35214.1
747.813	9570.06	1037.69	22742.1	33237.3	35220.5
748.313	9588.49	1047.61	22943.7	33301	35229.6
748.813	9611.6	1059.54	23155.2	33362.4	35240.5
749.313	9640.47	1073.53	23378	33424.5	35250.1
749.813	9673.79	1090.41	23609.4	33484.5	35258
750.312	9710.18	1112.41	23848.3	33550.6	35268.3
750.812	9751.06	1138.63	24090.8	33622.3	35277.6
751.312	9797.95	1167.37	24339.4	33697.9	35286.8
751.812	9843.47	1197.59	24590.3	33776.5	35294.6
752.312	9883.03	1227.82	24844.8	33852.3	35300
752.812	9913.97	1254.32	25097.3	33924.1	35306.9
753.312	9939.03	1275.56	25350.3	33991.5	35314.8
753.812	9957.53	1291.66	25605.8	34057.5	35323.2
754.311	9969.52	1304.59	25860.7	34117.8	35331.9
754.811	9977.37	1314.75	26113.5	34172.2	35341.2
755.311	9981.3	1325.54	26354.7	34220.1	35357.9
755.811	9981.34	1336.36	26577.2	34264.8	35385.4
756.311	9978.64	1346.61	26780.6	34303.5	35422.7
756.811	9970.57	1357.62	26964.1	34340.6	35469
757.311	9955.35	1371.4	27134.3	34378.2	35524.2
757.811	9935.65	1388.14	27284.4	34417.3	35591.2
758.31	9922.54	1410.46	27417	34458.7	35673
758.81	9909.9	1437.18	27540	34504.8	35765.3
759.31	9900.97	1466.95	27657.2	34556.4	35867.5
759.81	9892.73	1498.43	27767.6	34616.3	35983.1
760.31	9883.85	1528.3	27869.4	34680.1	36111.2
760.81	9873.54	1555.44	27967.6	34752.9	36251.3
761.31	9862.63	1579.99	28061.2	34836	36401.5
761.81	9851.19	1601.4	28149.8	34923.6	36558.5
762.309	9841.88	1620.54	28228.4	35021.6	36718.4
762.809	9836.03	1640.72	28304.2	35120.4	36880.2
763.309	9833	1660.27	28383.3	35214	37043
763.809	9826.71	1681.9	28474.4	35304.8	37210.2
764.309	9817.93	1708.13	28574.5	35401	37381
764.809	9805.77	1738.14	28685.7	35502.9	37550.6
765.309	9791.45	1772.46	28804.2	35610.7	37715.2
765.809	9773.45	1810.04	28928.7	35713.2	37880.6
766.308	9752.76	1846.76	29059.6	35819.4	38047.9
766.808	9731.31	1881.34	29193.8	35925.5	38215.5
767.308	9708.87	1914.24	29325.1	36030.6	38388.1
767.808	9683	1945.34	29451.7	36129.3	38559.2
768.308	9654.8	1973.53	29574.6	36217.6	38734
768.808	9628.28	2001.93	29696.8	36291.6	38914.5
769.308	9603.76	2033.81	29819.7	36347.5	39097.4
769.808	9581.16	2069.12	29942.6	36393.8	39277.2
770.307	9565.04	2104.31	30059.9	36435.8	39450.9
770.807	9553.62	2139.67	30169.3	36465.4	39618.2
771.307	9544.24	2175.54	30270.3	36486.1	39772.7
771.807	9538.59	2209.8	30362.4	36505	39920.9
772.307	9533.18	2238.41	30443.9	36526.3	40059.4
772.807	9528.71	2263.13	30517.2	36548.7	40184.5
773.307	9521.56	2285.43	30585.3	36578.1	40300.8
773.807	9517.11	2305.29	30649.7	36609.7	40393.1
774.306	9514.74	2325.38	30709.1	36646.1	40464.5
774.806	9513.75	2346.2	30763.6	36679.7	40532.5
775.306	9509.46	2369.49	30808.8	36717.3	40597.3
775.806	9504.75	2395.71	30844	36754.8	40654.1
776.306	9496.5	2423.3	30868.9	36790.6	40700.7
776.806	9482.85	2456.12	30887.2	36826.1	40739.7
777.306	9467.76	2493.27	30901.3	36861.8	40767.6
777.806	9457.72	2533.47	30913.1	36896.9	40795.9
778.305	9448.95	2580.15	30923.6	36925.1	40833.9
778.805	9445.36	2631.41	30933.6	36949.2	40888.7
779.305	9447.22	2689.99	30939.8	36976	40950.2
779.805	9451.67	2754.67	30940.4	37006.1	41019.7
780.305	9459.08	2823.24	30936.1	37039.3	41088.5
780.805	9470.92	2894.03	30925.7	37078.6	41154.7
781.305	9477.37	2966.3	30907.1	37128.2	41214.5
781.805	9478.51	3036.74	30881.5	37187.6	41269
782.304	9479.84	3097.77	30851.3	37260.4	41310.8
782.804	9480.59	3152.12	30815.5	37337	41349.1
783.304	9485.52	3203.67	30779.9	37411.2	41394.8
783.804	9488.92	3256.95	30743.5	37480.3	41432.5
784.304	9491.85	3307.87	30705.5	37540.3	41469.2
784.804	9498.64	3354.61	30666.9	37588.4	41500
785.304	9505.95	3402.05	30629.5	37627.2	41520.9
785.804	9514.27	3449.3	30596.8	37658.7	41537.3
786.303	9524.96	3497.39	30569.4	37680.3	41545.9
786.803	9533.44	3542.27	30543.7	37692.5	41550.7
787.303	9542	3584.12	30516.5	37694.8	41560.5
787.803	9552.47	3628.23	30484.6	37687.8	41567.8
788.303	9565.04	3674.25	30446.4	37670.2	41573.1
788.803	9579.82	3720.57	30397.7	37641.3	41572.9
789.303	9595.76	3766.46	30337	37600.1	41575.1
789.803	9607.76	3811.32	30264.6	37548.1	41581.7
790.302	9613.05	3856.07	30178.8	37485.6	41595.4
790.802	9613.57	3899.78	30079.4	37412.5	41610.2
791.302	9609.44	3942.41	29966.6	37330.2	41623.3
791.802	9603.82	3981.58	29839	37239.7	41633.5
792.302	9599.04	4017.61	29695.5	37140.3	41636
792.802	9593.97	4055.17	29539.1	37029.3	41635
793.302	9591.27	4098.66	29367.4	36910.2	41631.4
793.802	9592.4	4144.13	29179.7	36781.4	41629.5
794.301	9600.87	4192.72	28976.5	36647.6	41628.7
794.801	9613.96	4244.92	28763.2	36510.7	41627.3
795.301	9627.03	4298.03	28545.4	36377.8	41625.6
795.801	9639.99	4351.91	28332.8	36250.9	41625.1
796.301	9653.88	4405.34	28140	36133.6	41624.4
796.801	9665.23	4453.98	27966.9	36022	41624.1
797.301	9674.94	4498.09	27821.7	35921.4	41628.7
797.801	9683.18	4538.77	27707.7	35834.4	41636.9
798.3	9696.53	4577.87	27625.4	35760.3	41648.6
798.8	9717.04	4620.41	27567.7	35707.5	41658.3
799.3	9738.96	4668.9	27541.9	35679.1	41670.2
799.8	9762.16	4723.98	27523.5	35680.5	41678.2
800.3	9786.47	4778.9	27517.1	35703.4	41680.3
800.8	9809.25	4836.25	27524.5	35742.4	41676.7
801.3	9828.77	4898.58	27544.2	35785.6	41672.9
801.8	9851.13	4965.91	27569.8	35831.9	41667
802.299	9871.52	5031.61	27598.9	35878.1	41661.1
802.799	9889.83	5102.51	27634.1	35920.8	41654.3
803.299	9903.39	5175.02	27679.4	35950.9	41645.7
803.799	9916.34	5245.65	27731.8	35977	41637.4
804.299	9924.3	5317.42	27787.7	35995.6	41626.7
804.799	9937.55	5386.82	27845.8	36012.1	41617.5
805.299	9952.08	5453.63	27905.4	36027.1	41608.8
805.799	9964.83	5517.04	27967.9	36042.5	41598.2
806.298	9970.92	5579.66	28030.3	36048.2	41585.9
806.798	9971.7	5636.52	28094.1	36053.3	41568.8
807.298	9968.49	5690.21	28157	36057.1	41548.6
807.798	9967.15	5736.23	28217	36064.4	41521.2
808.298	9968.85	5779.14	28273.3	36066.4	41485.2
808.798	9973.09	5821.09	28325.6	36074.2	41439.4
809.298	9977.19	5866.89	28381	36076.9	41378.9
809.798	9984.87	5913.3	28439.3	36084.1	41298.3
810.297	9993.56	5959.46	28499.2	36084.7	41198.3
810.797	10000.4	6004.16	28560.9	36083.3	41071.8
811.297	10004.7	6046.75	28628	36078.7	40918.8
811.797	10003.9	6092.49	28700.3	36075.4	40742.2
812.297	9994.92	6139.92	28778.9	36074.4	40547.6
812.797	9987.78	6185.88	28864	36073	40347.7
813.297	9978.53	6229.49	28949.8	36072.1	40146
813.797	9960.81	6270.09	29033.6	36069.4	39930
814.296	9944.37	6309.01	29112.9	36064.9	39707.4
814.796	9929.47	6349.66	29186.9	36055.4	39480.6
815.296	9914.45	6388.93	29252.6	36051.1	39258.9
815.796	9912.67	6426.5	29309.1	36047.6	39053.5
816.296	9920.14	6466.05	29355.1	36044.1	38868.2
816.796	9934.84	6511.09	29392.5	36040.2	38699.1
817.296	9952.11	6561.35	29424.5	36037.4	38553.5
817.796	9978.66	6618.6	29450.1	36036.5	38424
818.295	10012.6	6676.12	29473.6	36042.4	38321
818.795	10064.5	6733.65	29501.9	36052.5	38237.8
819.295	10129.3	6789.45	29531.8	36064.6	38165.3
819.795	10200.6	6844.62	29561.9	36079.2	38097.3
820.295	10273	6897.1	29589.9	36090.1	38033.6
820.795	10343.8	6947.76	29615.1	36097.4	37973.6
821.295	10411.7	6998.13	29636.6	36100.1	37924.1
821.795	10475.1	7049.01	29651.5	36098.9	37879
822.294	10534.4	7106.34	29661.6	36097.6	37839.4
822.794	10596	7167.16	29665.9	36098.6	37810.2
823.294	10663.8	7226.61	29670.3	36098	37783
823.794	10728.1	7285.72	29673.9	36098.7	37761.8
824.294	10786.6	7341.78	29675.2	36098.4	37737.6
824.794	10834.1	7391.39	29670.6	36094.6	37711.6
825.294	10871.4	7433.44	29661.5	36088.6	37680.7
825.794	10897.8	7470.39	29648.1	36079.5	37647.7
826.293	10920.8	7504.77	29630	36066.4	37611.8
826.793	10942	7537.44	29611	36048.1	37574.4
827.293	10960.9	7568.62	29591.1	36023.6	37535.6
827.793	10978.4	7598.7	29575.1	35994.7	37492.4
828.293	10987.8	7628.5	29560.5	35958.4	37439.5
828.793	10991.6	7659.65	29544.2	35915.5	37383.8
829.293	10989.6	7692.75	29525.4	35865.4	37324
829.793	10982.1	7728.69	29505.5	35809.4	37255.8
830.292	10970	7768.13	29491.6	35746.6	37180.6
830.792	10957.7	7811.64	29478.2	35681.1	37091.6
831.292	10945.1	7861.77	29464.3	35611.4	36994.2
831.792	10930.1	7910.75	29450.1	35541.1	36890.8
832.292	10915.4	7958.21	29437.3	35473.6	36792.5
832.792	10902.8	8007.69	29424.2	35403.9	36693.2
833.292	10892.3	8059.61	29409.7	35332.6	36589.5
833.792	10881.8	8103.09	29391.6	35254.5	36488.8
834.291	10868.8	8138.16	29372.2	35173.6	36388.3
834.791	10850.7	8164.72	29348.7	35083.7	36284
835.291	10831.8	8184.75	29322.5	34988.8	36177.8
835.791	10813.2	8201.65	29298	34888.4	36069.1
836.291	10784.3	8221.82	29278.1	34781.7	35962.1
836.791	10751.5	8246.07	29260.2	34671.5	35857.5
837.291	10711.7	8270.4	29246.8	34560.8	35756.9
837.791	10673.9	8297.15	29241.7	34457.1	35666.3
838.29	10636.5	8325.26	29249.7	34364.6	35592
838.79	10602.9	8352.59	29270.5	34280.5	35536.1
839.29	10574.1	8381.01	29296.5	34211.5	35495.1
839.79	10547.9	8410.06	29329.3	34154.7	35463.9
840.29	10521.1	8440.38	29370.4	34105.8	35436.9
840.79	10494.2	8473.75	29417.6	34069.3	35414.1
841.29	10473.1	8505.48	29466.1	34040.5	35394.3
841.79	10451.4	8536.1	29513.3	34019.7	35375.4
842.289	10430.5	8564.86	29564.6	33999.8	35356.1
842.789	10412.1	8590.95	29616.8	33976.3	35335.8
843.289	10399.4	8616.32	29670.1	33953.8	35312.8
843.789	10389.7	8641.86	29722	33931.7	35292.3
844.289	10383.2	8665.72	29776.7	33908.4	35277.5
844.789	10375.5	8688.47	29835.5	33884.5	35263.8
845.289	10366.5	8714.55	29899.6	33862.5	35251.1
845.789	10357.9	8747.2	29968.4	33841.9	35238.3
846.288	10349.7	8786.12	30045.2	33822.6	35226.4
846.788	10341.3	8828.26	30129.8	33810.9	35216.2
847.288	10333.7	8873.05	30214.6	33800.9	35203.5
847.788	10326	8916.17	30307.4	33799.8	35194
848.288	10314.6	8957.99	30403.7	33805.2	35182.4
848.788	10305.4	8997.45	30502.3	33815.2	35170.2
849.288	10297.7	9031.12	30601.8	33828.3	35154.8
849.788	10287.1	9058.25	30696.6	33841.2	35138.7
850.287	10275.1	9081	30788.4	33851.6	35121.5
850.787	10260.2	9097.78	30882.3	33854.1	35100
851.287	10240.7	9114.93	30978.1	33854.7	35075.9
851.787	10215.4	9132.45	31075.5	33852	35051.4
852.287	10182	9146.2	31178.3	33849.8	35027.9
852.787	10149.1	9161.04	31283.4	33847	35004.6
853.287	10124.2	9174.93	31392.6	33843.8	34980.7
853.787	10106.6	9193.99	31500.6	33837.1	34957
854.286	10097.4	9216.1	31610.8	33829.9	34933.1
854.786	10089.6	9239.96	31721.9	33823.5	34909.4
855.286	10081.8	9262.01	31832.6	33817	34880.7
855.786	10070.7	9282.91	31941.9	33809.4	34845.6
856.286	10062.1	9302.96	32050.9	33801.4	34804.1
856.786	10055.7	9321.16	32160.3	33794.9	34757.3
857.286	10054.9	9337.21	32266.6	33784.4	34703.5
857.786	10063.2	9349.75	32367.1	33771.4	34648.5
858.285	10071.9	9358.35	32462.3	33754.6	34590.9
858.785	10086.1	9366.95	32547.1	33738.2	34530.3
859.285	10107.1	9379.77	32616.9	33720.2	34464
859.785	10135.5	9393.71	32673.5	33700.9	34390.3
860.285	10166.7	9409.47	32719.6	33685.6	34311.4
860.785	10196.9	9429.46	32760.2	33669	34228.8
861.285	10217.2	9451.79	32792.3	33651.7	34142
861.785	10231.3	9477.72	32819.8	33632.6	34048.5
862.284	10240.8	9502.78	32840.9	33607.3	33951
862.784	10250.4	9528.03	32856.2	33576.4	33848.2
863.284	10258.3	9554.21	32868	33537.3	33744.7
863.784	10264.3	9580.8	32874.2	33491.8	33637.3
864.284	10275.4	9605.88	32880.2	33438.9	33526.3
864.784	10293.7	9630.72	32882.8	33378.9	33417.1
865.284	10317.6	9654.97	32879.9	33313.1	33323.1
865.784	10346.6	9678.94	32870	33243.5	33239.8
866.283	10383.3	9703.27	32855.2	33169.8	33163.7
866.783	10424.9	9728.21	32837.1	33092.7	33094.4
867.283	10466.1	9752.53	32816.6	33010	33029.1
867.783	10504.1	9775.44	32794.8	32920.6	32966.4
868.283	10536.2	9792.62	32774	32829.7	32903.1
868.783	10563.1	9805.36	32748.7	32734.8	32842.1
869.283	10583.8	9815.25	32719.4	32639.6	32783.6
869.783	10602.2	9819.89	32686.4	32547.2	32730.9
870.282	10620.1	9822.17	32649.1	32456.4	32684.1
870.782	10633.8	9821.99	32608.2	32370.2	32639.4
871.282	10644.9	9820.98	32565.8	32279	32594.6
871.782	10650.1	9820.69	32523.7	32194.4	32546.7
872.282	10650.7	9822.69	32481.4	32118	32506.4
872.782	10653.6	9826.46	32438.9	32052	32471.4
873.282	10656.2	9831.23	32394.6	31997.9	32438.8
873.782	10652.7	9836.78	32344.9	31966.8	32409.3
874.281	10642.3	9840.65	32289.4	31948.4	32386
874.781	10631.1	9841.66	32226.4	31950.1	32371.8
875.281	10625.3	9845.44	32155.6	31977	32365.1
875.781	10620.3	9850.77	32076.3	32024.1	32360.8
876.281	10615.8	9857.34	31984.4	32087	32359.1
876.781	10610.8	9866.17	31879.8	32162.1	32356.5
877.281	10605.1	9877.58	31763.6	32245	32351.4
877.781	10599.9	9893.01	31636.5	32332.3	32344.5
878.28	10596.1	9912.94	31498.1	32419.6	32341.4
878.78	10595.3	9935.86	31352.7	32505.4	32345
879.28	10597.1	9960.62	31200.5	32594.6	32354.1
879.78	10600.7	9986.48	31042.6	32699.2	32363.5
880.28	10610.2	10010	30877.6	32815.8	32375.3
880.78	10622.6	10029.8	30705.2	32950.5	32396.5
881.28	10635.1	10049.4	30524.4	33102.9	32423.3
881.78	10647	10065.8	30335.4	33259.4	32459.5
882.279	10656.8	10079.9	30138.1	33423.6	32498.5
882.779	10664.1	10095	29933.1	33590.5	32542.7
883.279	10669.9	10113.6	29721.6	33763.8	32590.7
883.779	10669.4	10132	29507.5	33936.1	32635.2
884.279	10661.6	10148.5	29289.2	34108.5	32677.6
884.779	10653.2	10163.1	29069.8	34274.5	32719.8
885.279	10647.6	10176.2	28852.9	34436.8	32756.6
885.779	10635.7	10185	28642.1	34597.2	32789.9
886.278	10628.6	10190.4	28439.2	34755.2	32814.2
886.778	10627.1	10192.8	28254.1	34919.7	32840.9
887.278	10633.5	10194.1	28085.8	35083.1	32869.6
887.778	10640.4	10196.3	27936.8	35257.4	32895.3
888.278	10641.6	10203.1	27808.8	35437.5	32922.8
888.778	10640.4	10211.6	27705.2	35620.3	32964
889.278	10640.6	10221.4	27621.3	35801	33003.6
889.778	10641.2	10232.5	27557.1	35980.5	33040.4
890.277	10634.4	10241.8	27506.7	36157.4	33074.5
890.777	10625	10250.2	27472.6	36329.2	33113.9
891.277	10615.1	10261.3	27459	36496.2	33156.8
891.777	10601.3	10271.6	27467.7	36658	33200.7
892.277	10580.9	10283.8	27495.1	36813.2	33244.2
892.777	10559.9	10294.9	27538.3	36958.8	33280.9
893.277	10536.7	10305.6	27594.2	37097.9	33313.7
893.777	10516.1	10311.8	27662.2	37230.5	33338.1
894.276	10502	10314.6	27742	37363.5	33351.9
894.776	10493.5	10316.5	27826	37495.1	33356.7
895.276	10483.7	10316.4	27919.3	37622.8	33360.7
895.776	10479.2	10316.8	28022.2	37743.7	33366.9
896.276	10471.7	10317.7	28134.4	37858.7	33376.2
896.776	10465.1	10323	28252.8	37967.8	33383.8
897.276	10456.7	10331	28379.2	38068.5	33391.4
897.776	10448.6	10342	28511.1	38163.8	33395.6
898.275	10441.9	10353.6	28646.4	38246.3	33395.9
898.775	10435.5	10365.7	28779	38320.3	33388.9
899.275	10430.5	10377	28909.3	38389.2	33380.5
899.775	10428.6	10386.2	29034.6	38454.9	33373.5
900.275	10429.8	10394.6	29156.1	38514.5	33367.5
900.775	10435.8	10402.7	29271.3	38565.7	33363.4
901.275	10447.3	10409.6	29380.4	38614.7	33362.1
901.775	10462.1	10415.6	29484	38659.6	33362.3
902.274	10479.3	10424.9	29579.7	38703.4	33363.7
902.774	10493.9	10431.6	29664.2	38746.4	33368
903.274	10504.6	10436	29736.1	38785.9	33380.7
903.774	10510.8	10439.9	29793.8	38814.3	33394.8
904.274	10509.9	10445	29839.7	38830.6	33410
904.774	10498.4	10449.8	29878.7	38839.2	33422.3
905.274	10473.6	10454.4	29910.1	38846.5	33433.2
905.774	10444.4	10457.3	29932.2	38852.7	33442.2
906.273	10420.2	10459.9	29955.3	38860.8	33451.8
906.773	10393.4	10462.2	29975.9	38869	33459
907.273	10371.8	10466	29990.5	38877.2	33468.8
907.773	10364.4	10472.6	30000.2	38892.6	33473.2
908.273	10364.5	10479.9	30009.9	38908.9	33479.4
908.773	10368.6	10485.7	30016.5	38924.3	33490.8
909.273	10377.1	10492.1	30021.9	38943.3	33501.5
909.773	10384.7	10496.2	30024.4	38967.2	33509.4
910.272	10394.5	10498.4	30024.1	38988.9	33516.2
910.772	10400.7	10501.7	30024.1	39009.5	33527
911.272	10401.9	10506.8	30020.8	39033.2	33536.3
911.772	10399.6	10512.5	30020.4	39062.2	33543.6
912.272	10394.9	10518.9	30025.4	39091.5	33547.1
912.772	10390.8	10525.3	30033.1	39119.8	33547
913.272	10380	10530.1	30036.7	39149.6	33544.5
913.772	10366	10535.5	30037.4	39176.3	33540.9
914.271	10349	10540.7	30031.3	39203.3	33530.2
914.771	10331.8	10545.3	30021.1	39227.8	33515.5
915.271	10312.5	10547.5	30004.3	39249.9	33495.9
915.771	10288.2	10549.5	29985.3	39267.7	33468.8
916.271	10263.2	10551.8	29963.7	39280.2	33435.8
916.771	10237	10554.6	29938.6	39289.5	33400.9
917.271	10209.2	10555.4	29912.3	39292.7	33364.3
917.771	10176.5	10555.2	29883.6	39292.1	33327.9
918.27	10135.9	10554.6	29851.2	39286.8	33286.4
918.77	10098.4	10552.6	29814.9	39275.9	33241.4
919.27	10055.3	10549.4	29776.4	39258.8	33192.7
919.77	10013	10544.6	29738.8	39234.7	33140.2
920.27	9966.14	10541.4	29700	39205.3	33083
920.77	9918.93	10538.3	29663.7	39171.3	33026.7
921.27	9871.27	10532.8	29634	39134.7	32972.1
921.77	9830.16	10524.6	29610.2	39095.2	32919.3
922.269	9796.43	10514.8	29590.8	39050.3	32867.1
922.769	9767.18	10505.4	29574.3	39001.1	32819.5
923.269	9737.17	10497.7	29563.8	38948.2	32771.7
923.769	9706.06	10492.1	29554.3	38886.9	32730.7
924.269	9669.69	10488.1	29545.4	38813.9	32698.5
924.769	9632.68	10485.8	29533.5	38726.9	32667.8
925.269	9591.04	10485.8	29516.2	38627.1	32639.8
925.769	9547.59	10486.9	29497.9	38516.8	32616.8
926.268	9505.22	10488.8	29479.5	38395.7	32597.1
926.768	9466.76	10492.6	29463.8	38263.8	32581
927.268	9440.94	10497.6	29449.5	38121.2	32564.8
927.768	9430.67	10500.9	29433.2	37969.5	32549.9
928.268	9431.27	10505.3	29414.4	37810.1	32543.8
928.768	9433.86	10512.5	29391.3	37640.8	32546.7
929.268	9437.04	10520.2	29364.1	37463.2	32549.3
929.768	9434.32	10529.2	29335.5	37279.9	32550.4
930.267	9428.31	10539.2	29307.2	37092	32549
930.767	9416.07	10551	29276	36898.1	32545.1
931.267	9399.98	10561.6	29241.3	36690.6	32538.2
931.767	9381.85	10571.1	29202.2	36466.5	32527.4
932.267	9361.95	10578.3	29157.5	36223.7	32519.1
932.767	9340.98	10584.8	29106.3	35962.1	32515.3
933.267	9320.52	10590.2	29049.5	35681.8	32515.7
933.767	9299.33	10593.2	28986.7	35386.8	32518.7
934.266	9277.38	10594.5	28918.8	35074.2	32520.8
934.766	9250.79	10595.6	28842.4	34738.7	32525.2
935.266	9222.54	10597.8	28759.5	34375.2	32532.2
935.766	9192.68	10603.5	28670.4	33992.7	32540.9
936.266	9163.98	10608.6	28573.5	33586.8	32553.7
936.766	9135.84	10612.3	28465.5	33172.6	32565.4
937.266	9108.88	10617.1	28347.2	32743.9	32576.7
937.766	9082.02	10619.8	28219.1	32326.4	32593.3
938.265	9059.01	10620.2	28085.7	31930.9	32608.8
938.765	9041.75	10620	27947	31559.8	32620
939.265	9034.2	10622.5	27801.5	31240.7	32629.1
939.765	9026.76	10629.1	27650.9	31012.4	32635.2
940.265	9018.19	10637.1	27499.7	30859.7	32634.6
940.765	9011.23	10648.5	27355.5	30740.7	32633.6
941.265	9004.25	10662.1	27219.5	30659.6	32630.6
941.765	9000.33	10673.5	27089	30620	32624.1
942.264	8997.9	10682.8	26967.2	30611.8	32612.3
942.764	9001.26	10689.9	26859.7	30622.2	32596.6
943.264	9016.57	10698.6	26765.3	30646.7	32573.7
943.764	9041.31	10709.5	26679.4	30677.8	32548.6
944.264	9075.3	10719.9	26607.3	30712.3	32520.5
944.764	9115.78	10731.7	26548.7	30756.7	32494.6
945.264	9156.17	10745.8	26501.6	30817.8	32469
945.764	9195.18	10761.5	26462.9	30890.5	32439.9
946.263	9234	10775.6	26428.3	30972.2	32406.5
946.763	9271.44	10787.5	26397	31057.5	32365.7
947.263	9311.45	10796.1	26374.2	31145.7	32319.2
947.763	9351.57	10802.7	26357.4	31232.7	32267.3
948.263	9388.24	10807.7	26346.4	31320.8	32209.1
948.763	9421.09	10814.3	26345.7	31397.8	32145.9
949.263	9447.69	10821.5	26354.6	31466.5	32077
949.763	9470.31	10825.6	26373.9	31524	32002.5
950.262	9490.86	10821.6	26402.6	31568.9	31923.4
950.762	9518.25	10817.2	26436	31596.7	31837.5
951.262	9550.24	10812.5	26468.7	31617.7	31742.1
951.762	9587.46	10809.2	26496	31638.2	31635.1
952.262	9628.27	10807.6	26520.6	31653.9	31517.4
952.762	9670.66	10808.3	26540.9	31666	31395.9
953.262	9709.23	10809.6	26555.4	31672.6	31265
953.762	9744.08	10812.1	26564.8	31679.7	31132.4
954.261	9774.52	10816.7	26572.3	31680.9	30999.9
954.761	9804.8	10821.8	26578.6	31680.6	30869.1
955.261	9838.39	10826.2	26583.4	31669.3	30744
955.761	9870.21	10829.6	26586.6	31650.6	30621.4
956.261	9901.84	10832.2	26591	31629.9	30508
956.761	9928.26	10836.7	26600.8	31608.9	30396.8
957.261	9950.55	10841.8	26612.4	31588.7	30292.6
957.761	9971.25	10848.4	26626.6	31575.2	30200.6
958.26	9988	10857.7	26645.8	31560.3	30116.3
958.76	9998.37	10868.1	26668.9	31542.3	30042.6
959.26	10001.7	10877.3	26696.9	31527.2	29987.7
959.76	10001.1	10883.3	26731.6	31515.9	29946.2
960.26	9996.54	10887.2	26775.6	31509.3	29913.5
960.76	9991.78	10890.4	26826.2	31505.1	29887.5
961.26	9987.26	10893.4	26883.5	31507.1	29865.7
961.76	9984.68	10895	26942.3	31512.9	29851.3
962.259	9979.22	10895.1	27004.8	31516.1	29838.3
962.759	9979.78	10896.1	27062.3	31512.8	29827
963.259	9985.65	10894.4	27116.9	31501.1	29813.7
963.759	9995.22	10892.2	27160	31482.8	29796.7
964.259	10010.7	10893.3	27187.9	31460.8	29776.1
964.759	10035.9	10894.6	27200.1	31434.8	29749.2
965.259	10068.4	10897.2	27201	31405.6	29714.5
965.759	10108.4	10898.7	27200.8	31372.3	29674.5
966.258	10157.8	10898.9	27211.3	31336.3	29630.4
966.758	10210.6	10897.4	27227.4	31301.7	29577.9
967.258	10267.3	10894.1	27258.6	31268	29520.1
967.758	10328.3	10887.9	27298.2	31232.1	29455.1
968.258	10389.9	10881.8	27349	31193.6	29382
968.758	10446.5	10875.3	27410.6	31152.4	29302.4
969.258	10498.9	10869	27490.9	31107.3	29218.1
969.758	10545	10859.5	27584	31060.4	29128.4
970.257	10584.8	10848	27681.1	31014.1	29033.7
970.757	10617.4	10835.1	27777.8	30970.9	28938.9
971.257	10647.4	10821.3	27873.3	30927	28846.1
971.757	10678.4	10808.9	27961.8	30882.6	28756.2
972.257	10712.9	10797.9	28037.9	30837.5	28664.6
972.757	10748.1	10792.8	28100.4	30792.6	28576
973.257	10786.9	10791.4	28151	30746.6	28484.8
973.757	10828.5	10789.3	28187.2	30700.7	28397
974.256	10868.5	10787.3	28211.1	30652.1	28311.2
974.756	10907.5	10786.8	28231.7	30597.2	28229.6
975.256	10945.2	10783.8	28249	30537.6	28157.5
975.756	10979.1	10779.6	28263.7	30470	28098.8
976.256	11006.3	10775.6	28275.7	30395.2	28060.4
976.756	11025.7	10772.3	28282.7	30312.3	28046.5
977.256	11038.2	10770.1	28280.2	30224.8	28048.9
977.756	11052.1	10768.6	28274.3	30133.4	28070.5
978.255	11058.8	10764.7	28263.8	30037.7	28106.5
978.755	11055	10761.9	28249.5	29939.4	28154.3
979.255	11043.2	10758.6	28229.2	29835.8	28212.7
979.755	11022.1	10755.8	28202.1	29724.3	28279.1
980.255	10991	10753.5	28166.8	29604.6	28352.7
980.755	10957.6	10751.9	28133.8	29480.5	28431.2
981.255	10925.9	10749.9	28107.5	29355.2	28514.3
981.755	10891.6	10746.1	28086.6	29230.5	28596
982.254	10855.8	10739.2	28067.3	29104.2	28677.3
982.754	10821.8	10731.3	28050.7	28970.1	28754
983.254	10795.2	10721.4	28031.9	28829.1	28824.8
983.754	10776.6	10712.2	28009	28678.7	28887.5
984.254	10763.4	10702.6	27976	28522.9	28942
984.754	10753.7	10693.4	27928.3	28365.4	28986
985.254	10751.7	10685.3	27865	28208	29022.2
985.754	10754.5	10681.5	27788	28054.9	29048.7
986.253	10761.2	10678.2	27703.4	27911.4	29064.5
986.753	10770.8	10677.6	27612.1	27771.8	29060.2
987.253	10783.4	10678.2	27514.7	27642.3	29031.8
987.753	10797.5	10679	27413.3	27526.4	28980.8
988.253	10808.9	10681.2	27308.7	27416.3	28912.4
988.753	10820.2	10685	27198.9	27309.2	28842.9
989.253	10834.2	10687	27087.2	27207.4	28779.2
989.753	10844.8	10685.4	26975.5	27112	28724.8
990.252	10852	10681.6	26872.4	27021.1	28670.2
990.752	10854.4	10676.7	26779.2	26932.7	28612.5
991.252	10854.8	10669.4	26697.8	26847.6	28548.1
991.752	10853.8	10662.2	26633	26766.6	28482.1
992.252	10851.1	10656.3	26583.1	26687.4	28411.2
992.752	10846.3	10651.5	26545.9	26611.6	28333.9
993.252	10837.6	10647.9	26520.2	26534.5	28246.4
993.752	10825.9	10647.3	26503.6	26458.1	28150.2
994.251	10814.3	10650.3	26492.7	26376.1	28044.7
994.751	10801.7	10655.6	26487	26293.4	27932.7
995.251	10795.3	10662.5	26495	26207.4	27817.1
995.751	10790.9	10668.6	26514.4	26115.5	27702.3
996.251	10784.7	10674.8	26544	26015.9	27586.2
996.751	10777.4	10681.8	26576.4	25907.9	27477
997.251	10762.8	10690.8	26612.5	25788.4	27376.7
997.751	10741.3	10699.2	26649.7	25661.5	27282.9
[truncated: 6,004 more rows]
